# Supplementary material for: Synthetic Data Generation for Classifying Electrophysiological and Morpho- Electrophysiological Neurons from Mouse Visual Cortex
Source: Research Square preprint supplement (doi:10.21203/rs.3.rs-7545694/v1), 2025-09-17
Supplement: Supplementary file 1 [file 11f9b445a927d8b4626db77a.xlsx]

## Sheet: Feuil1
mean_fit_time	mean_score_time	mean_test_score	std_test_score	mean_train_score	std_train_score	params	rank_test_score	scaler	classifier	consistency
0.0178795	0.00626614	0.65	0.0283279	0.670679	0.00884355	{'classifier__C': 0.1, 'classifier__gamma': 'scale'}	5	minmax	svm_linear	-0.020679
0.0219376	0.00450277	0.65	0.0283279	0.670679	0.00884355	{'classifier__C': 0.1, 'classifier__gamma': 'auto'}	5	minmax	svm_linear	-0.020679
0.0169281	0.00305238	0.416667	0	0.416667	0	{'classifier__C': 0.1, 'classifier__gamma': 'scale'}	5	minmax	svm_rbf	0
0.0144979	0.0033998	0.416667	0	0.416667	0	{'classifier__C': 0.1, 'classifier__gamma': 'auto'}	5	minmax	svm_rbf	0
0.0192871	0.00333555	0.425	0.0177865	0.426852	0.00828748	{'classifier__C': 1, 'classifier__gamma': 'auto'}	4	minmax	svm_rbf	-0.00185185
0.0144411	0.00309396	0.416667	0	0.416667	0	{'classifier__C': 0.1, 'classifier__gamma': 'scale'}	3	minmax	svm_sigmoid	0
0.0154004	0.00351641	0.416667	0	0.416667	0	{'classifier__C': 0.1, 'classifier__gamma': 'auto'}	3	minmax	svm_sigmoid	0
0.0211311	0.00318453	0.416667	0	0.416667	0	{'classifier__C': 1, 'classifier__gamma': 'scale'}	3	minmax	svm_sigmoid	0
0.0162276	0.00383542	0.416667	0	0.416667	0	{'classifier__C': 1, 'classifier__gamma': 'auto'}	3	minmax	svm_sigmoid	0
0.0171278	0.00232315	0.494444	0.0368514	0.507099	0.0210262	{'classifier__C': 10, 'classifier__gamma': 'scale'}	2	minmax	svm_sigmoid	-0.0126543
0.0111337	0.00404212	0.416667	0	0.416667	0	{'classifier__C': 0.1, 'classifier__gamma': 'auto'}	4	minmax	svm_poly	0
0.0143841	0.00279155	0.416667	0	0.416667	0	{'classifier__C': 1, 'classifier__gamma': 'auto'}	4	minmax	svm_poly	0
0.0131474	0.00218709	0.416667	0	0.416667	0	{'classifier__C': 10, 'classifier__gamma': 'auto'}	4	minmax	svm_poly	0
0.029059	0.00246875	0.436111	0.0329843	0.448765	0.0399378	{'classifier__C': 0.1, 'classifier__penalty': 'l1', 'classifier__solver': 'liblinear'}	6	minmax	logistic_regression	-0.0126543
0.0230053	0.00296237	0.519444	0.0329843	0.532099	0.0202484	{'classifier__C': 0.1, 'classifier__penalty': 'l2', 'classifier__solver': 'liblinear'}	5	minmax	logistic_regression	-0.0126543
0.00930829	0.00141237	0.458333	0.0377819	0.458951	0.0092644	{'classifier__alpha': 10}	3	minmax	multinomial_nb	-0.000617284
0.0199206	0.00503013	0.416667	0	0.416667	0	{'classifier__C': 0.1, 'classifier__gamma': 'scale'}	5	standard	svm_rbf	0
0.0252773	0.00612664	0.416667	0	0.416667	0	{'classifier__C': 0.1, 'classifier__gamma': 'auto'}	5	standard	svm_rbf	0
0.0209852	0.00335298	0.469444	0.0262055	0.480864	0.0133682	{'classifier__C': 0.1, 'classifier__gamma': 'scale'}	5	standard	svm_sigmoid	-0.0114198
0.0178089	0.0026062	0.466667	0.0242161	0.469444	0.0129077	{'classifier__C': 0.1, 'classifier__gamma': 'auto'}	6	standard	svm_sigmoid	-0.00277778
0.0232892	0.00446544	0.741667	0.0448764	0.769444	0.00995819	{'classifier__C': 1, 'classifier__gamma': 'scale'}	3	standard	svm_sigmoid	-0.0277778
0.0255706	0.00429676	0.45	0.0166667	0.47963	0.0094829	{'classifier__C': 0.1, 'classifier__gamma': 'scale'}	5	standard	svm_poly	-0.0296296
0.0173305	0.00358236	0.45	0.0166667	0.467901	0.00572446	{'classifier__C': 0.1, 'classifier__gamma': 'auto'}	5	standard	svm_poly	-0.0179012
0.0280726	0.00546448	0.416667	0	0.416667	0	{'classifier__C': 0.1, 'classifier__gamma': 'scale'}	5	robust	svm_rbf	0
0.0345026	0.00478785	0.416667	0	0.416667	0	{'classifier__C': 0.1, 'classifier__gamma': 'auto'}	5	robust	svm_rbf	0
0.0227275	0.00305433	0.416667	0	0.416667	0	{'classifier__C': 0.1, 'classifier__gamma': 'scale'}	5	robust	svm_sigmoid	0
0.0222175	0.00371072	0.416667	0	0.417284	0.00123457	{'classifier__C': 0.1, 'classifier__gamma': 'auto'}	5	robust	svm_sigmoid	-0.000617284
0.0278342	0.00363455	0.633333	0.0552771	0.65463	0.0537152	{'classifier__C': 1, 'classifier__gamma': 'scale'}	2	robust	svm_sigmoid	-0.0212963
0.0254448	0.00415914	0.597222	0.0705468	0.621296	0.052922	{'classifier__C': 1, 'classifier__gamma': 'auto'}	3	robust	svm_sigmoid	-0.0240741
0.0283309	0.0039969	0.422222	0.0166667	0.436111	0.0228916	{'classifier__C': 0.1, 'classifier__gamma': 'scale'}	6	robust	svm_poly	-0.0138889
0.0229417	0.00363116	0.605556	0.0272166	0.61142	0.00810148	{'classifier__C': 0.1, 'classifier__gamma': 'scale'}	5	maxabs	svm_linear	-0.0058642
0.0182693	0.00390701	0.605556	0.0272166	0.61142	0.00810148	{'classifier__C': 0.1, 'classifier__gamma': 'auto'}	5	maxabs	svm_linear	-0.0058642
0.016238	0.00295827	0.416667	0	0.416667	0	{'classifier__C': 0.1, 'classifier__gamma': 'scale'}	4	maxabs	svm_rbf	0
0.0210646	0.00375907	0.416667	0	0.416667	0	{'classifier__C': 0.1, 'classifier__gamma': 'auto'}	4	maxabs	svm_rbf	0
0.0225461	0.00632901	0.55	0.0323942	0.564506	0.0136955	{'classifier__C': 1, 'classifier__gamma': 'scale'}	3	maxabs	svm_rbf	-0.0145062
0.0172213	0.00347123	0.416667	0	0.416667	0	{'classifier__C': 1, 'classifier__gamma': 'auto'}	4	maxabs	svm_rbf	0
0.0193439	0.00375388	0.416667	0	0.416667	0	{'classifier__C': 0.1, 'classifier__gamma': 'scale'}	3	maxabs	svm_sigmoid	0
0.0203517	0.00388434	0.416667	0	0.416667	0	{'classifier__C': 0.1, 'classifier__gamma': 'auto'}	3	maxabs	svm_sigmoid	0
0.0195587	0.00341668	0.416667	0	0.416667	0	{'classifier__C': 1, 'classifier__gamma': 'scale'}	3	maxabs	svm_sigmoid	0
0.0218853	0.00477431	0.416667	0	0.416667	0	{'classifier__C': 1, 'classifier__gamma': 'auto'}	3	maxabs	svm_sigmoid	0
0.0169973	0.00421312	0.613889	0.0262055	0.625926	0.00802469	{'classifier__C': 10, 'classifier__gamma': 'scale'}	2	maxabs	svm_sigmoid	-0.012037
0.0173567	0.00564051	0.616667	0.0272166	0.632716	0.012112	{'classifier__C': 10, 'classifier__gamma': 'auto'}	1	maxabs	svm_sigmoid	-0.0160494
0.0171143	0.00451002	0.416667	0	0.416667	0	{'classifier__C': 0.1, 'classifier__gamma': 'scale'}	4	maxabs	svm_poly	0
0.0142386	0.00371444	0.416667	0	0.416667	0	{'classifier__C': 0.1, 'classifier__gamma': 'auto'}	4	maxabs	svm_poly	0
0.0144237	0.00298693	0.652778	0.0284638	0.680247	0.00917659	{'classifier__C': 1, 'classifier__gamma': 'scale'}	2	maxabs	svm_poly	-0.0274691
0.0159211	0.00380392	0.416667	0	0.416667	0	{'classifier__C': 1, 'classifier__gamma': 'auto'}	4	maxabs	svm_poly	0
0.0155326	0.00296721	0.438889	0.0346944	0.45216	0.0263794	{'classifier__C': 10, 'classifier__gamma': 'auto'}	3	maxabs	svm_poly	-0.0132716
0.0455479	0.00367866	0.430556	0.0334489	0.442284	0.0415017	{'classifier__C': 0.1, 'classifier__penalty': 'l1', 'classifier__solver': 'liblinear'}	6	maxabs	logistic_regression	-0.0117284
0.0320561	0.00552845	0.486111	0.0334489	0.489198	0.0174731	{'classifier__C': 0.1, 'classifier__penalty': 'l2', 'classifier__solver': 'liblinear'}	5	maxabs	logistic_regression	-0.00308642
0.035454	0.00532691	0.416667	0	0.416667	0	{'classifier__C': 0.1, 'classifier__gamma': 'scale'}	3	normalizer	svm_linear	0
0.0145084	0.00383804	0.416667	0	0.416667	0	{'classifier__C': 0.1, 'classifier__gamma': 'auto'}	3	normalizer	svm_linear	0
0.015404	0.0057394	0.416667	0	0.416667	0	{'classifier__C': 1, 'classifier__gamma': 'scale'}	3	normalizer	svm_linear	0
0.0161865	0.00478063	0.416667	0	0.416667	0	{'classifier__C': 1, 'classifier__gamma': 'auto'}	3	normalizer	svm_linear	0
0.017467	0.00346074	0.441667	0.0262055	0.45679	0.0045779	{'classifier__C': 10, 'classifier__gamma': 'scale'}	1	normalizer	svm_linear	-0.0151235
0.0167914	0.00291927	0.441667	0.0262055	0.45679	0.0045779	{'classifier__C': 10, 'classifier__gamma': 'auto'}	1	normalizer	svm_linear	-0.0151235
0.0171365	0.00609887	0.416667	0	0.416667	0	{'classifier__C': 0.1, 'classifier__gamma': 'scale'}	2	normalizer	svm_rbf	0
0.0142334	0.00323927	0.416667	0	0.416667	0	{'classifier__C': 0.1, 'classifier__gamma': 'auto'}	2	normalizer	svm_rbf	0
0.0173051	0.00495503	0.416667	0	0.416667	0	{'classifier__C': 1, 'classifier__gamma': 'scale'}	2	normalizer	svm_rbf	0
0.0185741	0.00625663	0.416667	0	0.416667	0	{'classifier__C': 1, 'classifier__gamma': 'auto'}	2	normalizer	svm_rbf	0
0.0181879	0.00348868	0.416667	0	0.416667	0	{'classifier__C': 10, 'classifier__gamma': 'auto'}	2	normalizer	svm_rbf	0
0.0136771	0.00461543	0.416667	0	0.416667	0	{'classifier__C': 0.1, 'classifier__gamma': 'scale'}	2	normalizer	svm_sigmoid	0
0.0207837	0.00334246	0.416667	0	0.416667	0	{'classifier__C': 0.1, 'classifier__gamma': 'auto'}	2	normalizer	svm_sigmoid	0
0.0151386	0.00350955	0.416667	0	0.416667	0	{'classifier__C': 1, 'classifier__gamma': 'scale'}	2	normalizer	svm_sigmoid	0
0.0149019	0.00481484	0.416667	0	0.416667	0	{'classifier__C': 1, 'classifier__gamma': 'auto'}	2	normalizer	svm_sigmoid	0
0.0174296	0.00389543	0.444444	0.030429	0.440123	0.00440829	{'classifier__C': 10, 'classifier__gamma': 'scale'}	1	normalizer	svm_sigmoid	0.00432099
0.0153582	0.00389595	0.416667	0	0.416667	0	{'classifier__C': 10, 'classifier__gamma': 'auto'}	2	normalizer	svm_sigmoid	0
0.0171235	0.00337436	0.416667	0	0.416667	0	{'classifier__C': 0.1, 'classifier__gamma': 'scale'}	3	normalizer	svm_poly	0
0.0124335	0.00208669	0.416667	0	0.416667	0	{'classifier__C': 0.1, 'classifier__gamma': 'auto'}	3	normalizer	svm_poly	0
0.0167621	0.00332348	0.427778	0.0184257	0.427778	0.0020473	{'classifier__C': 1, 'classifier__gamma': 'scale'}	2	normalizer	svm_poly	0
0.0125316	0.00363102	0.416667	0	0.416667	0	{'classifier__C': 1, 'classifier__gamma': 'auto'}	3	normalizer	svm_poly	0
0.0151617	0.0047781	0.561111	0.0493789	0.583333	0.00478146	{'classifier__C': 10, 'classifier__gamma': 'scale'}	1	normalizer	svm_poly	-0.0222222
0.0127882	0.00222735	0.416667	0	0.416667	0	{'classifier__C': 10, 'classifier__gamma': 'auto'}	3	normalizer	svm_poly	0
0.0147765	0.0021112	0.416667	0	0.416667	0	{'classifier__C': 0.1, 'classifier__penalty': 'l1', 'classifier__solver': 'liblinear'}	3	normalizer	logistic_regression	0
0.0186314	0.00220494	0.416667	0	0.416667	0	{'classifier__C': 0.1, 'classifier__penalty': 'l2', 'classifier__solver': 'liblinear'}	3	normalizer	logistic_regression	0
0.0326618	0.00279975	0.416667	0	0.418827	0.00339506	{'classifier__C': 1, 'classifier__penalty': 'l1', 'classifier__solver': 'liblinear'}	3	normalizer	logistic_regression	-0.00216049
0.0278621	0.00386508	0.416667	0	0.416667	0	{'classifier__C': 1, 'classifier__penalty': 'l2', 'classifier__solver': 'liblinear'}	3	normalizer	logistic_regression	0
0.0366384	0.00310085	0.438889	0.0299176	0.445988	0.00521048	{'classifier__C': 10, 'classifier__penalty': 'l2', 'classifier__solver': 'liblinear'}	2	normalizer	logistic_regression	-0.00709877
0.105687	0.00752282	0.416667	0	0.416667	0	{'classifier__C': 0.1, 'classifier__gamma': 'scale'}	5	yeo-johnson	svm_rbf	0
0.101126	0.0067096	0.416667	0	0.416667	0	{'classifier__C': 0.1, 'classifier__gamma': 'auto'}	5	yeo-johnson	svm_rbf	0
0.0993572	0.0059927	0.488889	0.0184257	0.495988	0.00676905	{'classifier__C': 0.1, 'classifier__gamma': 'scale'}	5	yeo-johnson	svm_sigmoid	-0.00709877
0.103243	0.00696831	0.486111	0.0186339	0.484877	0.0050621	{'classifier__C': 0.1, 'classifier__gamma': 'auto'}	6	yeo-johnson	svm_sigmoid	0.00123457
0.108967	0.00532262	0.430556	0.0186339	0.457099	0.0050621	{'classifier__C': 0.1, 'classifier__gamma': 'auto'}	6	yeo-johnson	svm_poly	-0.0265432
0.0761184	0.0259306	0.425	0.025	0.425309	0.0259259	{'classifier__C': 0.1, 'classifier__gamma': 'scale'}	5	quantile-normal	svm_rbf	-0.000308642
0.0890744	0.0224484	0.416667	0	0.418827	0.00648148	{'classifier__C': 0.1, 'classifier__gamma': 'auto'}	6	quantile-normal	svm_rbf	-0.00216049
0.0735371	0.0224796	0.425	0.025	0.424691	0.0240741	{'classifier__C': 0.1, 'classifier__gamma': 'scale'}	5	quantile-normal	svm_sigmoid	0.000308642
0.0800125	0.0235253	0.419444	0.00833333	0.417593	0.00277778	{'classifier__C': 0.1, 'classifier__gamma': 'auto'}	6	quantile-normal	svm_sigmoid	0.00185185
0.0792028	0.0209717	0.630556	0.0279163	0.654321	0.0145422	{'classifier__C': 1, 'classifier__gamma': 'scale'}	3	quantile-normal	svm_sigmoid	-0.0237654
0.0776026	0.0220959	0.588889	0.0444444	0.588272	0.0250818	{'classifier__C': 1, 'classifier__gamma': 'auto'}	4	quantile-normal	svm_sigmoid	0.000617284
0.0690806	0.0200804	0.666667	0.0755637	0.672222	0.0198493	{'classifier__C': 10, 'classifier__gamma': 'auto'}	2	quantile-normal	svm_sigmoid	-0.00555556
0.077637	0.0233515	0.458333	0.0468943	0.480864	0.0230471	{'classifier__C': 0.1, 'classifier__gamma': 'scale'}	6	quantile-normal	svm_poly	-0.0225309
0.0586078	0.0061651	0.416667	0	0.416667	0	{'classifier__C': 0.1, 'classifier__gamma': 'scale'}	5	quantile-uniform	svm_rbf	0
0.0593906	0.0099973	0.416667	0	0.416667	0	{'classifier__C': 0.1, 'classifier__gamma': 'auto'}	5	quantile-uniform	svm_rbf	0
0.0713867	0.0118276	0.602778	0.0279163	0.616358	0.00479141	{'classifier__C': 1, 'classifier__gamma': 'auto'}	4	quantile-uniform	svm_rbf	-0.0135802
0.0625369	0.00574808	0.416667	0	0.416667	0	{'classifier__C': 0.1, 'classifier__gamma': 'scale'}	4	quantile-uniform	svm_sigmoid	0
0.0598187	0.00397279	0.416667	0	0.416667	0	{'classifier__C': 0.1, 'classifier__gamma': 'auto'}	4	quantile-uniform	svm_sigmoid	0
0.0668121	0.00628502	0.416667	0	0.416667	0	{'classifier__C': 1, 'classifier__gamma': 'scale'}	4	quantile-uniform	svm_sigmoid	0
0.0720509	0.00670714	0.469444	0.023074	0.475617	0.00542543	{'classifier__C': 1, 'classifier__gamma': 'auto'}	3	quantile-uniform	svm_sigmoid	-0.00617284
0.0851805	0.00592375	0.513889	0.0356812	0.525926	0.0162851	{'classifier__C': 10, 'classifier__gamma': 'scale'}	2	quantile-uniform	svm_sigmoid	-0.012037
0.0644384	0.0038913	0.416667	0	0.416667	0	{'classifier__C': 0.1, 'classifier__gamma': 'auto'}	5	quantile-uniform	svm_poly	0
0.0655703	0.00439136	0.416667	0	0.416667	0	{'classifier__C': 1, 'classifier__gamma': 'auto'}	5	quantile-uniform	svm_poly	0
0.070174	0.00619249	0.577778	0.0272166	0.580864	0.00474145	{'classifier__C': 0.1, 'classifier__penalty': 'l1', 'classifier__solver': 'liblinear'}	6	quantile-uniform	logistic_regression	-0.00308642
0.0421617	0.00363038	0.611111	0.0277778	0.626235	0.0046706	{'classifier__alpha': 10}	3	quantile-uniform	multinomial_nb	-0.0151235
