# Supplementary material for: Synthetic Data Generation for Classifying Electrophysiological and Morpho- Electrophysiological Neurons from Mouse Visual Cortex
Source: Research Square preprint supplement (doi:10.21203/rs.3.rs-7545694/v1), 2025-09-17
Supplement: Supplementary file 2 [file 2d35d6724e62ab766aa39438.xlsx]

## Sheet: mee-type_with_reducer
mean_fit_time	mean_score_time	mean_test_score	std_test_score	mean_train_score	std_train_score	params	rank_test_score	scaler	reducer	classifier	consistency
2.02	0.01	0.62	0.02	0.63	0.01	{'classifier__C': 1, 'classifier__penalty': 'l2', 'classifier__solver': 'liblinear'}	1	quantile-uniform	lda	logistic_regression	0.01
8.94	0.04	0.61	0.02	0.63	0.01	{'classifier__alpha': 0.01, 'classifier__hidden_layer_sizes': (50, 50)}	1	quantile-uniform	lle	mlp	0.03
0.05	0	0.62	0.02	0.63	0.01	{'classifier__C': 1, 'classifier__penalty': 'l2', 'classifier__solver': 'liblinear'}	1	quantile-uniform	lda	logistic_regression	0.01
0.02	0.01	0.6	0.02	0.62	0.01	{'classifier__C': 1, 'classifier__gamma': 'scale'}	1	minmax	pca	svm_linear	0.02
0.02	0.01	0.6	0.02	0.62	0.01	{'classifier__C': 1, 'classifier__gamma': 'auto'}	1	minmax	pca	svm_linear	0.02
0.08	0	0.59	0.02	0.62	0.01	{'classifier__C': 1, 'classifier__penalty': 'l2', 'classifier__solver': 'liblinear'}	1	normalizer	lda	logistic_regression	0.03
0.36	0.05	0.58	0.02	0.59	0.02	{'classifier__C': 1, 'classifier__gamma': 'scale'}	2	maxabs	modified_lle	svm_rbf	0.01
0.27	0.02	0.57	0.02	0.58	0.02	{}	1	maxabs	modified_lle	lda	0.01
0.02	0	0.54	0.02	0.57	0.01	{'classifier__C': 1, 'classifier__gamma': 'scale'}	1	minmax	lda	svm_sigmoid	0.02
0.04	0.02	0.54	0.02	0.57	0.01	{'classifier__C': 1, 'classifier__gamma': 'scale'}	1	standard	lda	svm_sigmoid	0.02
0.05	0.01	0.54	0.02	0.57	0.01	{'classifier__C': 1, 'classifier__gamma': 'scale'}	1	robust	lda	svm_sigmoid	0.02
0.02	0.01	0.54	0.02	0.57	0.01	{'classifier__C': 1, 'classifier__gamma': 'scale'}	1	maxabs	lda	svm_sigmoid	0.02
9.51	0.06	0.55	0.02	0.55	0.01	{'classifier__C': 1, 'classifier__gamma': 'scale'}	1	quantile-normal	isomap	svm_sigmoid	0
0.08	0.02	0.55	0.02	0.55	0.01	{'classifier__C': 1, 'classifier__gamma': 'scale'}	1	quantile-normal	isomap	svm_sigmoid	0
0.08	0.01	0.54	0.02	0.53	0.01	{'classifier__C': 1, 'classifier__gamma': 'scale'}	1	normalizer	lda	svm_sigmoid	-0.01
0.09	0.02	0.52	0.02	0.53	0.03	{'classifier__C': 1, 'classifier__penalty': 'l1', 'classifier__solver': 'liblinear'}	2	quantile-normal	modified_lle	logistic_regression	0.01
0.36	0.03	0.51	0.02	0.51	0.02	{'classifier__C': 10, 'classifier__gamma': 'scale'}	1	maxabs	modified_lle	svm_linear	0.01
0.3	0.07	0.51	0.02	0.51	0.02	{'classifier__C': 10, 'classifier__gamma': 'auto'}	1	maxabs	modified_lle	svm_linear	0.01
0.39	0.02	0.49	0.02	0.5	0.01	{'classifier__C': 0.1, 'classifier__gamma': 'scale'}	2	quantile-normal	pca	svm_sigmoid	0.01
1.07	0.01	0.5	0.02	0.5	0.01	{'classifier__C': 1, 'classifier__penalty': 'l1', 'classifier__solver': 'liblinear'}	2	quantile-uniform	modified_lle	logistic_regression	0
0.09	0.03	0.49	0.02	0.5	0.01	{'classifier__C': 0.1, 'classifier__gamma': 'scale'}	2	quantile-normal	pca	svm_sigmoid	0.01
0.07	0.01	0.5	0.02	0.5	0.01	{'classifier__C': 1, 'classifier__penalty': 'l1', 'classifier__solver': 'liblinear'}	2	quantile-uniform	modified_lle	logistic_regression	0
3.61	0.01	0.44	0.02	0.46	0.02	{'classifier__alpha': 0.0001, 'classifier__hidden_layer_sizes': (50, 50)}	2	normalizer	random_projection	mlp	0.02
7.06	0.01	0.44	0.02	0.46	0.01	{'classifier__alpha': 0.001, 'classifier__hidden_layer_sizes': (50, 50)}	1	normalizer	lle	mlp	0.02
0.46	0.02	0.48	0.02	0.46	0.02	{'classifier__C': 10, 'classifier__gamma': 'auto'}	2	yeo-johnson	nca	svm_sigmoid	-0.02
0.16	0	0.48	0.02	0.46	0.02	{'classifier__C': 10, 'classifier__gamma': 'auto'}	2	yeo-johnson	nca	svm_sigmoid	-0.02
0.14	0.02	0.44	0.02	0.45	0.02	{'classifier__C': 10, 'classifier__gamma': 'scale'}	1	standard	modified_lle	svm_linear	0.01
0.12	0.01	0.44	0.02	0.45	0.02	{'classifier__C': 10, 'classifier__gamma': 'auto'}	2	standard	modified_lle	svm_linear	0.01
0.06	0.01	0.43	0.02	0.45	0	{'classifier__C': 1, 'classifier__gamma': 'scale'}	1	normalizer	ica	svm_rbf	0.02
0.07	0.02	0.43	0.02	0.45	0	{'classifier__C': 1, 'classifier__gamma': 'auto'}	1	normalizer	ica	svm_rbf	0.02
0.26	0.02	0.42	0.02	0.45	0.02	{'classifier__C': 10, 'classifier__gamma': 'scale'}	1	normalizer	modified_lle	svm_rbf	0.03
0.4	0.01	0.43	0.02	0.44	0.01	{'classifier__C': 1, 'classifier__penalty': 'l1', 'classifier__solver': 'liblinear'}	2	standard	modified_lle	logistic_regression	0.01
0.21	0.02	0.42	0.01	0.44	0.02	{'classifier__C': 1, 'classifier__gamma': 'scale'}	2	robust	modified_lle	svm_rbf	0.02
0.09	0.01	0.43	0.02	0.44	0	{'classifier__C': 1, 'classifier__gamma': 'scale'}	1	normalizer	pca	svm_rbf	0.02
3.82	0.01	0.44	0.02	0.44	0.01	{'classifier__alpha': 0.01, 'classifier__hidden_layer_sizes': (50,)}	2	normalizer	pca	mlp	0.01
0.09	0.01	0.43	0.02	0.44	0.02	{'classifier__C': 10, 'classifier__penalty': 'l1', 'classifier__solver': 'liblinear'}	1	normalizer	random_projection	logistic_regression	0.01
0.14	0.02	0.43	0.02	0.44	0.01	{'classifier__C': 10, 'classifier__gamma': 'scale'}	1	normalizer	isomap	svm_linear	0
0.13	0.02	0.43	0.02	0.44	0.01	{'classifier__C': 10, 'classifier__gamma': 'auto'}	1	normalizer	isomap	svm_linear	0
0.17	0.02	0.44	0.02	0.44	0.01	{'classifier__C': 10, 'classifier__gamma': 'auto'}	2	normalizer	isomap	svm_rbf	0
0.14	0.02	0.43	0.02	0.44	0.01	{'classifier__C': 10, 'classifier__penalty': 'l1', 'classifier__solver': 'liblinear'}	1	normalizer	isomap	logistic_regression	0
0.13	0.03	0.43	0.01	0.44	0.01	{'classifier__C': 10, 'classifier__penalty': 'l1', 'classifier__solver': 'liblinear'}	1	normalizer	lle	logistic_regression	0.01
5.02	0.02	0.42	0.02	0.44	0.01	{'classifier__alpha': 0.01, 'classifier__hidden_layer_sizes': (50, 50)}	1	normalizer	modified_lle	mlp	0.01
4.23	0.01	0.42	0.02	0.44	0.01	{'classifier__alpha': 0.0001, 'classifier__hidden_layer_sizes': (50, 50)}	1	normalizer	modified_lle	mlp	0.01
4.01	0.01	0.42	0.02	0.44	0.01	{'classifier__alpha': 0.001, 'classifier__hidden_layer_sizes': (50, 50)}	1	normalizer	modified_lle	mlp	0.01
3.53	0.01	0.42	0.02	0.44	0.01	{'classifier__alpha': 0.01, 'classifier__hidden_layer_sizes': (50, 50)}	1	normalizer	modified_lle	mlp	0.01
0.04	0	0.43	0.02	0.43	0.01	{'classifier__C': 0.1, 'classifier__gamma': 'auto'}	2	standard	pca	svm_sigmoid	0
0.04	0.02	0.43	0.02	0.43	0.01	{'classifier__C': 0.1, 'classifier__gamma': 'auto'}	2	standard	truncatedsvd	svm_sigmoid	0
0.09	0.01	0.42	0.01	0.43	0.01	{'classifier__C': 0.1, 'classifier__gamma': 'scale'}	1	robust	pca	svm_linear	0.01
0.07	0.02	0.42	0.01	0.43	0.01	{'classifier__C': 0.1, 'classifier__gamma': 'auto'}	1	robust	pca	svm_linear	0.01
0.22	0.03	0.41	0.01	0.43	0.01	{'classifier__C': 10, 'classifier__gamma': 'scale'}	1	robust	ica	svm_linear	0.01
0.19	0.04	0.41	0.01	0.43	0.01	{'classifier__C': 10, 'classifier__gamma': 'auto'}	1	robust	ica	svm_linear	0.01
0.09	0.01	0.42	0.01	0.43	0.01	{'classifier__C': 1, 'classifier__gamma': 'scale'}	1	robust	ica	svm_rbf	0.01
0.09	0.01	0.42	0.01	0.43	0.01	{'classifier__C': 1, 'classifier__gamma': 'auto'}	1	robust	ica	svm_rbf	0.01
0.1	0.01	0.42	0.02	0.43	0.01	{'classifier__C': 10, 'classifier__gamma': 'scale'}	1	robust	ica	svm_rbf	0.02
0.11	0.01	0.42	0.02	0.43	0.01	{'classifier__C': 10, 'classifier__gamma': 'auto'}	1	robust	ica	svm_rbf	0.02
0.09	0.01	0.41	0.01	0.43	0.01	{'classifier__C': 1, 'classifier__gamma': 'scale'}	1	robust	truncatedsvd	svm_linear	0.01
0.09	0.02	0.41	0.01	0.43	0.01	{'classifier__C': 1, 'classifier__gamma': 'auto'}	1	robust	truncatedsvd	svm_linear	0.01
1.17	0.02	0.41	0.01	0.43	0.01	{'classifier__C': 10, 'classifier__gamma': 'scale'}	1	robust	truncatedsvd	svm_linear	0.01
1.24	0.01	0.41	0.01	0.43	0.01	{'classifier__C': 10, 'classifier__gamma': 'auto'}	1	robust	truncatedsvd	svm_linear	0.01
0.16	0.02	0.42	0	0.43	0	{'classifier__C': 10, 'classifier__gamma': 'scale'}	1	robust	modified_lle	svm_linear	0.01
0.19	0.02	0.42	0	0.43	0	{'classifier__C': 10, 'classifier__gamma': 'auto'}	1	robust	modified_lle	svm_linear	0.01
0.2	0.02	0.42	0	0.43	0	{'classifier__C': 10, 'classifier__gamma': 'auto'}	2	robust	modified_lle	svm_sigmoid	0.01
0.22	0.01	0.42	0.01	0.43	0.01	{'classifier__C': 10, 'classifier__penalty': 'l1', 'classifier__solver': 'liblinear'}	1	robust	modified_lle	logistic_regression	0.01
0.18	0.01	0.42	0	0.43	0	{'classifier__C': 10, 'classifier__penalty': 'l2', 'classifier__solver': 'liblinear'}	2	robust	modified_lle	logistic_regression	0.01
0.13	0.01	0.42	0.01	0.43	0.01	{}	1	robust	modified_lle	lda	0.01
0.06	0.02	0.42	0.01	0.43	0	{'classifier__C': 10, 'classifier__gamma': 'scale'}	1	normalizer	pca	svm_linear	0.01
0.06	0.02	0.42	0.01	0.43	0	{'classifier__C': 10, 'classifier__gamma': 'auto'}	1	normalizer	pca	svm_linear	0.01
0.05	0	0.43	0.02	0.43	0	{'classifier__C': 10, 'classifier__penalty': 'l1', 'classifier__solver': 'liblinear'}	1	normalizer	pca	logistic_regression	0
0.06	0	0.43	0.02	0.43	0	{'classifier__C': 10, 'classifier__penalty': 'l2', 'classifier__solver': 'liblinear'}	2	normalizer	pca	logistic_regression	0
0.06	0.01	0.43	0.02	0.43	0	{'classifier__C': 0.1, 'classifier__gamma': 'scale'}	1	normalizer	ica	svm_linear	0
0.05	0.02	0.43	0.02	0.43	0	{'classifier__C': 0.1, 'classifier__gamma': 'auto'}	1	normalizer	ica	svm_linear	0
0.04	0.01	0.43	0.02	0.43	0	{'classifier__C': 1, 'classifier__penalty': 'l1', 'classifier__solver': 'liblinear'}	1	normalizer	ica	logistic_regression	0
0.05	0.01	0.43	0.02	0.43	0	{'classifier__C': 1, 'classifier__penalty': 'l2', 'classifier__solver': 'liblinear'}	1	normalizer	ica	logistic_regression	0
0.05	0.01	0.43	0.02	0.43	0	{'classifier__C': 10, 'classifier__penalty': 'l1', 'classifier__solver': 'liblinear'}	1	normalizer	ica	logistic_regression	0
0.06	0.01	0.43	0.02	0.43	0	{'classifier__C': 10, 'classifier__penalty': 'l2', 'classifier__solver': 'liblinear'}	1	normalizer	ica	logistic_regression	0
0.05	0.01	0.43	0.02	0.43	0.02	{'classifier__C': 1, 'classifier__gamma': 'scale'}	1	normalizer	random_projection	svm_rbf	0
0.05	0.01	0.43	0.02	0.43	0.01	{'classifier__C': 10, 'classifier__gamma': 'auto'}	2	normalizer	random_projection	svm_rbf	0
0.14	0.02	0.43	0.01	0.43	0.01	{'classifier__C': 10, 'classifier__gamma': 'auto'}	1	normalizer	isomap	svm_sigmoid	0
0.14	0.02	0.43	0.02	0.43	0	{'classifier__C': 1, 'classifier__penalty': 'l1', 'classifier__solver': 'liblinear'}	2	normalizer	isomap	logistic_regression	0
0.13	0.01	0.43	0.02	0.43	0.01	{'classifier__C': 10, 'classifier__penalty': 'l2', 'classifier__solver': 'liblinear'}	2	normalizer	isomap	logistic_regression	0
0.13	0.03	0.42	0.01	0.43	0.01	{'classifier__C': 10, 'classifier__gamma': 'scale'}	1	normalizer	lle	svm_linear	0.01
0.13	0.03	0.42	0.01	0.43	0.01	{'classifier__C': 10, 'classifier__gamma': 'auto'}	1	normalizer	lle	svm_linear	0.01
0.15	0.03	0.42	0.01	0.43	0.01	{'classifier__C': 0.1, 'classifier__gamma': 'scale'}	2	normalizer	lle	svm_sigmoid	0.01
0.16	0.02	0.43	0.02	0.43	0.01	{'classifier__C': 1, 'classifier__gamma': 'scale'}	1	normalizer	lle	svm_sigmoid	0
0.13	0.03	0.42	0.01	0.43	0.01	{'classifier__C': 10, 'classifier__penalty': 'l2', 'classifier__solver': 'liblinear'}	2	normalizer	lle	logistic_regression	0.01
0.09	0.01	0.42	0.02	0.43	0.01	{}	1	normalizer	lle	lda	0.01
0.19	0.01	0.42	0.02	0.43	0	{'classifier__C': 10, 'classifier__gamma': 'scale'}	1	normalizer	modified_lle	svm_linear	0
0.2	0.03	0.42	0.02	0.43	0.01	{'classifier__C': 10, 'classifier__gamma': 'auto'}	1	normalizer	modified_lle	svm_linear	0
0.24	0.03	0.42	0.02	0.43	0.01	{'classifier__C': 1, 'classifier__gamma': 'scale'}	1	normalizer	modified_lle	svm_rbf	0.01
0.21	0.03	0.42	0.02	0.43	0	{'classifier__C': 10, 'classifier__gamma': 'auto'}	1	normalizer	modified_lle	svm_rbf	0
0.19	0.02	0.42	0.02	0.43	0	{'classifier__C': 10, 'classifier__gamma': 'auto'}	1	normalizer	modified_lle	svm_sigmoid	0
0.2	0.02	0.42	0.02	0.43	0.01	{'classifier__C': 10, 'classifier__penalty': 'l1', 'classifier__solver': 'liblinear'}	1	normalizer	modified_lle	logistic_regression	0.01
0.19	0.02	0.42	0.02	0.43	0	{'classifier__C': 10, 'classifier__penalty': 'l2', 'classifier__solver': 'liblinear'}	1	normalizer	modified_lle	logistic_regression	0
0.17	0.01	0.42	0.02	0.43	0.01	{}	1	normalizer	modified_lle	lda	0.01
2.64	0.02	0.42	0.02	0.43	0.01	{'classifier__alpha': 0.0001, 'classifier__hidden_layer_sizes': (50,)}	1	normalizer	modified_lle	mlp	0.01
3.41	0.02	0.42	0.02	0.43	0.01	{'classifier__alpha': 0.0001, 'classifier__hidden_layer_sizes': (100,)}	1	normalizer	modified_lle	mlp	0.01
2.35	0.02	0.42	0.02	0.43	0.01	{'classifier__alpha': 0.001, 'classifier__hidden_layer_sizes': (50,)}	1	normalizer	modified_lle	mlp	0.01
3.27	0.03	0.42	0.02	0.43	0.01	{'classifier__alpha': 0.001, 'classifier__hidden_layer_sizes': (100,)}	1	normalizer	modified_lle	mlp	0.01
2.26	0.02	0.42	0.02	0.43	0.01	{'classifier__alpha': 0.01, 'classifier__hidden_layer_sizes': (50,)}	1	normalizer	modified_lle	mlp	0.01
3.13	0.03	0.42	0.02	0.43	0.01	{'classifier__alpha': 0.01, 'classifier__hidden_layer_sizes': (100,)}	1	normalizer	modified_lle	mlp	0.01
1.61	0.02	0.42	0.02	0.43	0.01	{'classifier__alpha': 0.0001, 'classifier__hidden_layer_sizes': (50,)}	1	normalizer	modified_lle	mlp	0.01
2.58	0.01	0.42	0.02	0.43	0.01	{'classifier__alpha': 0.0001, 'classifier__hidden_layer_sizes': (100,)}	1	normalizer	modified_lle	mlp	0.01
1.5	0.01	0.42	0.02	0.43	0.01	{'classifier__alpha': 0.001, 'classifier__hidden_layer_sizes': (50,)}	1	normalizer	modified_lle	mlp	0.01
3.69	0.01	0.42	0.02	0.43	0.01	{'classifier__alpha': 0.001, 'classifier__hidden_layer_sizes': (100,)}	1	normalizer	modified_lle	mlp	0.01
1.58	0.01	0.42	0.02	0.43	0.01	{'classifier__alpha': 0.01, 'classifier__hidden_layer_sizes': (50,)}	1	normalizer	modified_lle	mlp	0.01
2.13	0.02	0.42	0.02	0.43	0.01	{'classifier__alpha': 0.01, 'classifier__hidden_layer_sizes': (100,)}	1	normalizer	modified_lle	mlp	0.01
0.15	0.01	0.43	0.02	0.43	0.02	{'classifier__C': 0.1, 'classifier__gamma': 'scale'}	1	yeo-johnson	random_projection	svm_sigmoid	0
0.05	0.02	0.43	0.02	0.43	0.02	{'classifier__C': 0.1, 'classifier__gamma': 'scale'}	1	quantile-normal	random_projection	svm_sigmoid	0
0.04	0	0.43	0.02	0.43	0.02	{'classifier__C': 0.1, 'classifier__gamma': 'scale'}	1	quantile-uniform	random_projection	svm_sigmoid	0
0.01	0	0.42	0	0.42	0	{'classifier__C': 0.1, 'classifier__gamma': 'scale'}	2	minmax	random_projection	svm_sigmoid	0
0.01	0	0.43	0.01	0.42	0.01	{'classifier__C': 0.1, 'classifier__gamma': 'auto'}	1	minmax	random_projection	svm_sigmoid	0
0.01	0	0.42	0	0.42	0	{'classifier__C': 0.1, 'classifier__gamma': 'scale'}	1	minmax	truncatedsvd	svm_sigmoid	0
0.02	0.01	0.42	0	0.42	0	{'classifier__C': 0.1, 'classifier__gamma': 'auto'}	1	minmax	truncatedsvd	svm_sigmoid	0
0.02	0.01	0.42	0	0.42	0	{'classifier__C': 1, 'classifier__gamma': 'scale'}	1	minmax	truncatedsvd	svm_sigmoid	0
0.02	0.01	0.42	0	0.42	0	{'classifier__C': 1, 'classifier__gamma': 'auto'}	1	minmax	truncatedsvd	svm_sigmoid	0
0.02	0	0.42	0	0.42	0	{'classifier__C': 10, 'classifier__gamma': 'auto'}	1	minmax	truncatedsvd	svm_sigmoid	0
0.41	0.05	0.42	0	0.42	0	{'classifier__max_depth': None, 'classifier__min_samples_leaf': 1, 'classifier__min_samples_split': 2, 'classifier__n_estimators': 50}	1	minmax	ltsa_lle	random_forest	0
0.72	0.04	0.42	0	0.42	0	{'classifier__max_depth': None, 'classifier__min_samples_leaf': 1, 'classifier__min_samples_split': 2, 'classifier__n_estimators': 100}	1	minmax	ltsa_lle	random_forest	0
1	0.06	0.42	0	0.42	0	{'classifier__max_depth': None, 'classifier__min_samples_leaf': 1, 'classifier__min_samples_split': 2, 'classifier__n_estimators': 200}	1	minmax	ltsa_lle	random_forest	0
0.46	0.03	0.42	0	0.42	0	{'classifier__max_depth': None, 'classifier__min_samples_leaf': 1, 'classifier__min_samples_split': 10, 'classifier__n_estimators': 50}	1	minmax	ltsa_lle	random_forest	0
0.73	0.05	0.42	0	0.42	0	{'classifier__max_depth': None, 'classifier__min_samples_leaf': 1, 'classifier__min_samples_split': 10, 'classifier__n_estimators': 100}	1	minmax	ltsa_lle	random_forest	0
1.11	0.06	0.42	0	0.42	0	{'classifier__max_depth': None, 'classifier__min_samples_leaf': 1, 'classifier__min_samples_split': 10, 'classifier__n_estimators': 200}	1	minmax	ltsa_lle	random_forest	0
0.38	0.03	0.42	0	0.42	0	{'classifier__max_depth': None, 'classifier__min_samples_leaf': 1, 'classifier__min_samples_split': 20, 'classifier__n_estimators': 50}	1	minmax	ltsa_lle	random_forest	0
0.68	0.04	0.42	0	0.42	0	{'classifier__max_depth': None, 'classifier__min_samples_leaf': 1, 'classifier__min_samples_split': 20, 'classifier__n_estimators': 100}	1	minmax	ltsa_lle	random_forest	0
0.95	0.04	0.42	0	0.42	0	{'classifier__max_depth': None, 'classifier__min_samples_leaf': 1, 'classifier__min_samples_split': 20, 'classifier__n_estimators': 200}	1	minmax	ltsa_lle	random_forest	0
0.39	0.03	0.42	0	0.42	0	{'classifier__max_depth': None, 'classifier__min_samples_leaf': 5, 'classifier__min_samples_split': 2, 'classifier__n_estimators': 50}	1	minmax	ltsa_lle	random_forest	0
0.64	0.03	0.42	0	0.42	0	{'classifier__max_depth': None, 'classifier__min_samples_leaf': 5, 'classifier__min_samples_split': 2, 'classifier__n_estimators': 100}	1	minmax	ltsa_lle	random_forest	0
1.01	0.06	0.42	0	0.42	0	{'classifier__max_depth': None, 'classifier__min_samples_leaf': 5, 'classifier__min_samples_split': 2, 'classifier__n_estimators': 200}	1	minmax	ltsa_lle	random_forest	0
0.39	0.03	0.42	0	0.42	0	{'classifier__max_depth': None, 'classifier__min_samples_leaf': 5, 'classifier__min_samples_split': 10, 'classifier__n_estimators': 50}	1	minmax	ltsa_lle	random_forest	0
0.58	0.05	0.42	0	0.42	0	{'classifier__max_depth': None, 'classifier__min_samples_leaf': 5, 'classifier__min_samples_split': 10, 'classifier__n_estimators': 100}	1	minmax	ltsa_lle	random_forest	0
0.96	0.06	0.42	0	0.42	0	{'classifier__max_depth': None, 'classifier__min_samples_leaf': 5, 'classifier__min_samples_split': 10, 'classifier__n_estimators': 200}	1	minmax	ltsa_lle	random_forest	0
0.46	0.03	0.42	0	0.42	0	{'classifier__max_depth': None, 'classifier__min_samples_leaf': 5, 'classifier__min_samples_split': 20, 'classifier__n_estimators': 50}	1	minmax	ltsa_lle	random_forest	0
0.57	0.04	0.42	0	0.42	0	{'classifier__max_depth': None, 'classifier__min_samples_leaf': 5, 'classifier__min_samples_split': 20, 'classifier__n_estimators': 100}	1	minmax	ltsa_lle	random_forest	0
1.04	0.06	0.42	0	0.42	0	{'classifier__max_depth': None, 'classifier__min_samples_leaf': 5, 'classifier__min_samples_split': 20, 'classifier__n_estimators': 200}	1	minmax	ltsa_lle	random_forest	0
0.44	0.04	0.42	0	0.42	0	{'classifier__max_depth': None, 'classifier__min_samples_leaf': 10, 'classifier__min_samples_split': 2, 'classifier__n_estimators': 50}	1	minmax	ltsa_lle	random_forest	0
0.56	0.04	0.42	0	0.42	0	{'classifier__max_depth': None, 'classifier__min_samples_leaf': 10, 'classifier__min_samples_split': 2, 'classifier__n_estimators': 100}	1	minmax	ltsa_lle	random_forest	0
1.04	0.06	0.42	0	0.42	0	{'classifier__max_depth': None, 'classifier__min_samples_leaf': 10, 'classifier__min_samples_split': 2, 'classifier__n_estimators': 200}	1	minmax	ltsa_lle	random_forest	0
0.39	0.02	0.42	0	0.42	0	{'classifier__max_depth': None, 'classifier__min_samples_leaf': 10, 'classifier__min_samples_split': 10, 'classifier__n_estimators': 50}	1	minmax	ltsa_lle	random_forest	0
0.59	0.04	0.42	0	0.42	0	{'classifier__max_depth': None, 'classifier__min_samples_leaf': 10, 'classifier__min_samples_split': 10, 'classifier__n_estimators': 100}	1	minmax	ltsa_lle	random_forest	0
1.05	0.06	0.42	0	0.42	0	{'classifier__max_depth': None, 'classifier__min_samples_leaf': 10, 'classifier__min_samples_split': 10, 'classifier__n_estimators': 200}	1	minmax	ltsa_lle	random_forest	0
0.37	0.02	0.42	0	0.42	0	{'classifier__max_depth': None, 'classifier__min_samples_leaf': 10, 'classifier__min_samples_split': 20, 'classifier__n_estimators': 50}	1	minmax	ltsa_lle	random_forest	0
0.55	0.04	0.42	0	0.42	0	{'classifier__max_depth': None, 'classifier__min_samples_leaf': 10, 'classifier__min_samples_split': 20, 'classifier__n_estimators': 100}	1	minmax	ltsa_lle	random_forest	0
0.91	0.06	0.42	0	0.42	0	{'classifier__max_depth': None, 'classifier__min_samples_leaf': 10, 'classifier__min_samples_split': 20, 'classifier__n_estimators': 200}	1	minmax	ltsa_lle	random_forest	0
0.4	0.04	0.42	0	0.42	0	{'classifier__max_depth': 10, 'classifier__min_samples_leaf': 1, 'classifier__min_samples_split': 2, 'classifier__n_estimators': 50}	1	minmax	ltsa_lle	random_forest	0
0.67	0.05	0.42	0	0.42	0	{'classifier__max_depth': 10, 'classifier__min_samples_leaf': 1, 'classifier__min_samples_split': 2, 'classifier__n_estimators': 100}	1	minmax	ltsa_lle	random_forest	0
0.94	0.05	0.42	0	0.42	0	{'classifier__max_depth': 10, 'classifier__min_samples_leaf': 1, 'classifier__min_samples_split': 2, 'classifier__n_estimators': 200}	1	minmax	ltsa_lle	random_forest	0
0.4	0.02	0.42	0	0.42	0	{'classifier__max_depth': 10, 'classifier__min_samples_leaf': 1, 'classifier__min_samples_split': 10, 'classifier__n_estimators': 50}	1	minmax	ltsa_lle	random_forest	0
0.53	0.05	0.42	0	0.42	0	{'classifier__max_depth': 10, 'classifier__min_samples_leaf': 1, 'classifier__min_samples_split': 10, 'classifier__n_estimators': 100}	1	minmax	ltsa_lle	random_forest	0
1.03	0.06	0.42	0	0.42	0	{'classifier__max_depth': 10, 'classifier__min_samples_leaf': 1, 'classifier__min_samples_split': 10, 'classifier__n_estimators': 200}	1	minmax	ltsa_lle	random_forest	0
0.37	0.03	0.42	0	0.42	0	{'classifier__max_depth': 10, 'classifier__min_samples_leaf': 1, 'classifier__min_samples_split': 20, 'classifier__n_estimators': 50}	1	minmax	ltsa_lle	random_forest	0
0.58	0.04	0.42	0	0.42	0	{'classifier__max_depth': 10, 'classifier__min_samples_leaf': 1, 'classifier__min_samples_split': 20, 'classifier__n_estimators': 100}	1	minmax	ltsa_lle	random_forest	0
0.98	0.06	0.42	0	0.42	0	{'classifier__max_depth': 10, 'classifier__min_samples_leaf': 1, 'classifier__min_samples_split': 20, 'classifier__n_estimators': 200}	1	minmax	ltsa_lle	random_forest	0
0.43	0.03	0.42	0	0.42	0	{'classifier__max_depth': 10, 'classifier__min_samples_leaf': 5, 'classifier__min_samples_split': 2, 'classifier__n_estimators': 50}	1	minmax	ltsa_lle	random_forest	0
0.58	0.04	0.42	0	0.42	0	{'classifier__max_depth': 10, 'classifier__min_samples_leaf': 5, 'classifier__min_samples_split': 2, 'classifier__n_estimators': 100}	1	minmax	ltsa_lle	random_forest	0
0.99	0.05	0.42	0	0.42	0	{'classifier__max_depth': 10, 'classifier__min_samples_leaf': 5, 'classifier__min_samples_split': 2, 'classifier__n_estimators': 200}	1	minmax	ltsa_lle	random_forest	0
0.47	0.03	0.42	0	0.42	0	{'classifier__max_depth': 10, 'classifier__min_samples_leaf': 5, 'classifier__min_samples_split': 10, 'classifier__n_estimators': 50}	1	minmax	ltsa_lle	random_forest	0
0.57	0.03	0.42	0	0.42	0	{'classifier__max_depth': 10, 'classifier__min_samples_leaf': 5, 'classifier__min_samples_split': 10, 'classifier__n_estimators': 100}	1	minmax	ltsa_lle	random_forest	0
1.01	0.05	0.42	0	0.42	0	{'classifier__max_depth': 10, 'classifier__min_samples_leaf': 5, 'classifier__min_samples_split': 10, 'classifier__n_estimators': 200}	1	minmax	ltsa_lle	random_forest	0
0.43	0.04	0.42	0	0.42	0	{'classifier__max_depth': 10, 'classifier__min_samples_leaf': 5, 'classifier__min_samples_split': 20, 'classifier__n_estimators': 50}	1	minmax	ltsa_lle	random_forest	0
0.67	0.04	0.42	0	0.42	0	{'classifier__max_depth': 10, 'classifier__min_samples_leaf': 5, 'classifier__min_samples_split': 20, 'classifier__n_estimators': 100}	1	minmax	ltsa_lle	random_forest	0
1	0.05	0.42	0	0.42	0	{'classifier__max_depth': 10, 'classifier__min_samples_leaf': 5, 'classifier__min_samples_split': 20, 'classifier__n_estimators': 200}	1	minmax	ltsa_lle	random_forest	0
0.4	0.03	0.42	0	0.42	0	{'classifier__max_depth': 10, 'classifier__min_samples_leaf': 10, 'classifier__min_samples_split': 2, 'classifier__n_estimators': 50}	1	minmax	ltsa_lle	random_forest	0
0.63	0.05	0.42	0	0.42	0	{'classifier__max_depth': 10, 'classifier__min_samples_leaf': 10, 'classifier__min_samples_split': 2, 'classifier__n_estimators': 100}	1	minmax	ltsa_lle	random_forest	0
1.04	0.06	0.42	0	0.42	0	{'classifier__max_depth': 10, 'classifier__min_samples_leaf': 10, 'classifier__min_samples_split': 2, 'classifier__n_estimators': 200}	1	minmax	ltsa_lle	random_forest	0
0.34	0.03	0.42	0	0.42	0	{'classifier__max_depth': 10, 'classifier__min_samples_leaf': 10, 'classifier__min_samples_split': 10, 'classifier__n_estimators': 50}	1	minmax	ltsa_lle	random_forest	0
0.65	0.05	0.42	0	0.42	0	{'classifier__max_depth': 10, 'classifier__min_samples_leaf': 10, 'classifier__min_samples_split': 10, 'classifier__n_estimators': 100}	1	minmax	ltsa_lle	random_forest	0
1.08	0.06	0.42	0	0.42	0	{'classifier__max_depth': 10, 'classifier__min_samples_leaf': 10, 'classifier__min_samples_split': 10, 'classifier__n_estimators': 200}	1	minmax	ltsa_lle	random_forest	0
0.4	0.04	0.42	0	0.42	0	{'classifier__max_depth': 10, 'classifier__min_samples_leaf': 10, 'classifier__min_samples_split': 20, 'classifier__n_estimators': 50}	1	minmax	ltsa_lle	random_forest	0
0.62	0.04	0.42	0	0.42	0	{'classifier__max_depth': 10, 'classifier__min_samples_leaf': 10, 'classifier__min_samples_split': 20, 'classifier__n_estimators': 100}	1	minmax	ltsa_lle	random_forest	0
1	0.05	0.42	0	0.42	0	{'classifier__max_depth': 10, 'classifier__min_samples_leaf': 10, 'classifier__min_samples_split': 20, 'classifier__n_estimators': 200}	1	minmax	ltsa_lle	random_forest	0
0.46	0.03	0.42	0	0.42	0	{'classifier__max_depth': 20, 'classifier__min_samples_leaf': 1, 'classifier__min_samples_split': 2, 'classifier__n_estimators': 50}	1	minmax	ltsa_lle	random_forest	0
0.54	0.03	0.42	0	0.42	0	{'classifier__max_depth': 20, 'classifier__min_samples_leaf': 1, 'classifier__min_samples_split': 2, 'classifier__n_estimators': 100}	1	minmax	ltsa_lle	random_forest	0
0.97	0.06	0.42	0	0.42	0	{'classifier__max_depth': 20, 'classifier__min_samples_leaf': 1, 'classifier__min_samples_split': 2, 'classifier__n_estimators': 200}	1	minmax	ltsa_lle	random_forest	0
0.37	0.04	0.42	0	0.42	0	{'classifier__max_depth': 20, 'classifier__min_samples_leaf': 1, 'classifier__min_samples_split': 10, 'classifier__n_estimators': 50}	1	minmax	ltsa_lle	random_forest	0
0.54	0.04	0.42	0	0.42	0	{'classifier__max_depth': 20, 'classifier__min_samples_leaf': 1, 'classifier__min_samples_split': 10, 'classifier__n_estimators': 100}	1	minmax	ltsa_lle	random_forest	0
0.94	0.04	0.42	0	0.42	0	{'classifier__max_depth': 20, 'classifier__min_samples_leaf': 1, 'classifier__min_samples_split': 10, 'classifier__n_estimators': 200}	1	minmax	ltsa_lle	random_forest	0
0.39	0.03	0.42	0	0.42	0	{'classifier__max_depth': 20, 'classifier__min_samples_leaf': 1, 'classifier__min_samples_split': 20, 'classifier__n_estimators': 50}	1	minmax	ltsa_lle	random_forest	0
0.62	0.06	0.42	0	0.42	0	{'classifier__max_depth': 20, 'classifier__min_samples_leaf': 1, 'classifier__min_samples_split': 20, 'classifier__n_estimators': 100}	1	minmax	ltsa_lle	random_forest	0
1.01	0.06	0.42	0	0.42	0	{'classifier__max_depth': 20, 'classifier__min_samples_leaf': 1, 'classifier__min_samples_split': 20, 'classifier__n_estimators': 200}	1	minmax	ltsa_lle	random_forest	0
0.42	0.03	0.42	0	0.42	0	{'classifier__max_depth': 20, 'classifier__min_samples_leaf': 5, 'classifier__min_samples_split': 2, 'classifier__n_estimators': 50}	1	minmax	ltsa_lle	random_forest	0
0.62	0.04	0.42	0	0.42	0	{'classifier__max_depth': 20, 'classifier__min_samples_leaf': 5, 'classifier__min_samples_split': 2, 'classifier__n_estimators': 100}	1	minmax	ltsa_lle	random_forest	0
0.95	0.05	0.42	0	0.42	0	{'classifier__max_depth': 20, 'classifier__min_samples_leaf': 5, 'classifier__min_samples_split': 2, 'classifier__n_estimators': 200}	1	minmax	ltsa_lle	random_forest	0
0.43	0.03	0.42	0	0.42	0	{'classifier__max_depth': 20, 'classifier__min_samples_leaf': 5, 'classifier__min_samples_split': 10, 'classifier__n_estimators': 50}	1	minmax	ltsa_lle	random_forest	0
0.55	0.03	0.42	0	0.42	0	{'classifier__max_depth': 20, 'classifier__min_samples_leaf': 5, 'classifier__min_samples_split': 10, 'classifier__n_estimators': 100}	1	minmax	ltsa_lle	random_forest	0
1.06	0.06	0.42	0	0.42	0	{'classifier__max_depth': 20, 'classifier__min_samples_leaf': 5, 'classifier__min_samples_split': 10, 'classifier__n_estimators': 200}	1	minmax	ltsa_lle	random_forest	0
0.39	0.03	0.42	0	0.42	0	{'classifier__max_depth': 20, 'classifier__min_samples_leaf': 5, 'classifier__min_samples_split': 20, 'classifier__n_estimators': 50}	1	minmax	ltsa_lle	random_forest	0
0.61	0.03	0.42	0	0.42	0	{'classifier__max_depth': 20, 'classifier__min_samples_leaf': 5, 'classifier__min_samples_split': 20, 'classifier__n_estimators': 100}	1	minmax	ltsa_lle	random_forest	0
1.1	0.07	0.42	0	0.42	0	{'classifier__max_depth': 20, 'classifier__min_samples_leaf': 5, 'classifier__min_samples_split': 20, 'classifier__n_estimators': 200}	1	minmax	ltsa_lle	random_forest	0
0.44	0.04	0.42	0	0.42	0	{'classifier__max_depth': 20, 'classifier__min_samples_leaf': 10, 'classifier__min_samples_split': 2, 'classifier__n_estimators': 50}	1	minmax	ltsa_lle	random_forest	0
0.57	0.02	0.42	0	0.42	0	{'classifier__max_depth': 20, 'classifier__min_samples_leaf': 10, 'classifier__min_samples_split': 2, 'classifier__n_estimators': 100}	1	minmax	ltsa_lle	random_forest	0
1.16	0.07	0.42	0	0.42	0	{'classifier__max_depth': 20, 'classifier__min_samples_leaf': 10, 'classifier__min_samples_split': 2, 'classifier__n_estimators': 200}	1	minmax	ltsa_lle	random_forest	0
0.42	0.03	0.42	0	0.42	0	{'classifier__max_depth': 20, 'classifier__min_samples_leaf': 10, 'classifier__min_samples_split': 10, 'classifier__n_estimators': 50}	1	minmax	ltsa_lle	random_forest	0
0.61	0.04	0.42	0	0.42	0	{'classifier__max_depth': 20, 'classifier__min_samples_leaf': 10, 'classifier__min_samples_split': 10, 'classifier__n_estimators': 100}	1	minmax	ltsa_lle	random_forest	0
1.11	0.07	0.42	0	0.42	0	{'classifier__max_depth': 20, 'classifier__min_samples_leaf': 10, 'classifier__min_samples_split': 10, 'classifier__n_estimators': 200}	1	minmax	ltsa_lle	random_forest	0
0.48	0.06	0.42	0	0.42	0	{'classifier__max_depth': 20, 'classifier__min_samples_leaf': 10, 'classifier__min_samples_split': 20, 'classifier__n_estimators': 50}	1	minmax	ltsa_lle	random_forest	0
0.58	0.04	0.42	0	0.42	0	{'classifier__max_depth': 20, 'classifier__min_samples_leaf': 10, 'classifier__min_samples_split': 20, 'classifier__n_estimators': 100}	1	minmax	ltsa_lle	random_forest	0
0.83	0.03	0.42	0	0.42	0	{'classifier__max_depth': 20, 'classifier__min_samples_leaf': 10, 'classifier__min_samples_split': 20, 'classifier__n_estimators': 200}	1	minmax	ltsa_lle	random_forest	0
0.18	0.03	0.42	0	0.42	0	{'classifier__max_depth': 5, 'classifier__min_samples_leaf': 1, 'classifier__min_samples_split': 2}	1	minmax	ltsa_lle	decision_tree	0
0.18	0.05	0.42	0	0.42	0	{'classifier__max_depth': 5, 'classifier__min_samples_leaf': 1, 'classifier__min_samples_split': 10}	1	minmax	ltsa_lle	decision_tree	0
0.21	0.03	0.42	0	0.42	0	{'classifier__max_depth': 5, 'classifier__min_samples_leaf': 1, 'classifier__min_samples_split': 20}	1	minmax	ltsa_lle	decision_tree	0
0.19	0.04	0.42	0	0.42	0	{'classifier__max_depth': 5, 'classifier__min_samples_leaf': 5, 'classifier__min_samples_split': 2}	1	minmax	ltsa_lle	decision_tree	0
0.24	0.03	0.42	0	0.42	0	{'classifier__max_depth': 5, 'classifier__min_samples_leaf': 5, 'classifier__min_samples_split': 10}	1	minmax	ltsa_lle	decision_tree	0
0.2	0.03	0.42	0	0.42	0	{'classifier__max_depth': 5, 'classifier__min_samples_leaf': 5, 'classifier__min_samples_split': 20}	1	minmax	ltsa_lle	decision_tree	0
0.19	0.03	0.42	0	0.42	0	{'classifier__max_depth': 5, 'classifier__min_samples_leaf': 10, 'classifier__min_samples_split': 2}	1	minmax	ltsa_lle	decision_tree	0
0.2	0.02	0.42	0	0.42	0	{'classifier__max_depth': 5, 'classifier__min_samples_leaf': 10, 'classifier__min_samples_split': 10}	1	minmax	ltsa_lle	decision_tree	0
0.16	0.03	0.42	0	0.42	0	{'classifier__max_depth': 5, 'classifier__min_samples_leaf': 10, 'classifier__min_samples_split': 20}	1	minmax	ltsa_lle	decision_tree	0
0.14	0.02	0.42	0	0.42	0	{'classifier__max_depth': 10, 'classifier__min_samples_leaf': 1, 'classifier__min_samples_split': 2}	1	minmax	ltsa_lle	decision_tree	0
0.14	0.01	0.42	0	0.42	0	{'classifier__max_depth': 10, 'classifier__min_samples_leaf': 1, 'classifier__min_samples_split': 10}	1	minmax	ltsa_lle	decision_tree	0
0.15	0.02	0.42	0	0.42	0	{'classifier__max_depth': 10, 'classifier__min_samples_leaf': 1, 'classifier__min_samples_split': 20}	1	minmax	ltsa_lle	decision_tree	0
0.12	0.01	0.42	0	0.42	0	{'classifier__max_depth': 10, 'classifier__min_samples_leaf': 5, 'classifier__min_samples_split': 2}	1	minmax	ltsa_lle	decision_tree	0
0.1	0.02	0.42	0	0.42	0	{'classifier__max_depth': 10, 'classifier__min_samples_leaf': 5, 'classifier__min_samples_split': 10}	1	minmax	ltsa_lle	decision_tree	0
0.13	0.01	0.42	0	0.42	0	{'classifier__max_depth': 10, 'classifier__min_samples_leaf': 5, 'classifier__min_samples_split': 20}	1	minmax	ltsa_lle	decision_tree	0
0.12	0.02	0.42	0	0.42	0	{'classifier__max_depth': 10, 'classifier__min_samples_leaf': 10, 'classifier__min_samples_split': 2}	1	minmax	ltsa_lle	decision_tree	0
0.11	0.02	0.42	0	0.42	0	{'classifier__max_depth': 10, 'classifier__min_samples_leaf': 10, 'classifier__min_samples_split': 10}	1	minmax	ltsa_lle	decision_tree	0
0.1	0.01	0.42	0	0.42	0	{'classifier__max_depth': 10, 'classifier__min_samples_leaf': 10, 'classifier__min_samples_split': 20}	1	minmax	ltsa_lle	decision_tree	0
0.1	0.01	0.42	0	0.42	0	{'classifier__max_depth': 20, 'classifier__min_samples_leaf': 1, 'classifier__min_samples_split': 2}	1	minmax	ltsa_lle	decision_tree	0
0.11	0.01	0.42	0	0.42	0	{'classifier__max_depth': 20, 'classifier__min_samples_leaf': 1, 'classifier__min_samples_split': 10}	1	minmax	ltsa_lle	decision_tree	0
0.1	0.01	0.42	0	0.42	0	{'classifier__max_depth': 20, 'classifier__min_samples_leaf': 1, 'classifier__min_samples_split': 20}	1	minmax	ltsa_lle	decision_tree	0
0.1	0.01	0.42	0	0.42	0	{'classifier__max_depth': 20, 'classifier__min_samples_leaf': 5, 'classifier__min_samples_split': 2}	1	minmax	ltsa_lle	decision_tree	0
0.1	0.01	0.42	0	0.42	0	{'classifier__max_depth': 20, 'classifier__min_samples_leaf': 5, 'classifier__min_samples_split': 10}	1	minmax	ltsa_lle	decision_tree	0
0.11	0.01	0.42	0	0.42	0	{'classifier__max_depth': 20, 'classifier__min_samples_leaf': 5, 'classifier__min_samples_split': 20}	1	minmax	ltsa_lle	decision_tree	0
0.1	0.01	0.42	0	0.42	0	{'classifier__max_depth': 20, 'classifier__min_samples_leaf': 10, 'classifier__min_samples_split': 2}	1	minmax	ltsa_lle	decision_tree	0
0.1	0.01	0.42	0	0.42	0	{'classifier__max_depth': 20, 'classifier__min_samples_leaf': 10, 'classifier__min_samples_split': 10}	1	minmax	ltsa_lle	decision_tree	0
0.1	0.01	0.42	0	0.42	0	{'classifier__max_depth': 20, 'classifier__min_samples_leaf': 10, 'classifier__min_samples_split': 20}	1	minmax	ltsa_lle	decision_tree	0
0.03	0.01	0.42	0	0.42	0	{'classifier__C': 0.1, 'classifier__gamma': 'scale'}	2	standard	random_projection	svm_sigmoid	0
0.25	0.02	0.42	0	0.42	0	{'classifier__max_depth': None, 'classifier__min_samples_leaf': 1, 'classifier__min_samples_split': 2, 'classifier__n_estimators': 50}	1	standard	ltsa_lle	random_forest	0
0.47	0.02	0.42	0	0.42	0	{'classifier__max_depth': None, 'classifier__min_samples_leaf': 1, 'classifier__min_samples_split': 2, 'classifier__n_estimators': 100}	1	standard	ltsa_lle	random_forest	0
0.7	0.04	0.42	0	0.42	0	{'classifier__max_depth': None, 'classifier__min_samples_leaf': 1, 'classifier__min_samples_split': 2, 'classifier__n_estimators': 200}	1	standard	ltsa_lle	random_forest	0
0.28	0.02	0.42	0	0.42	0	{'classifier__max_depth': None, 'classifier__min_samples_leaf': 1, 'classifier__min_samples_split': 10, 'classifier__n_estimators': 50}	1	standard	ltsa_lle	random_forest	0
0.43	0.02	0.42	0	0.42	0	{'classifier__max_depth': None, 'classifier__min_samples_leaf': 1, 'classifier__min_samples_split': 10, 'classifier__n_estimators': 100}	1	standard	ltsa_lle	random_forest	0
0.71	0.04	0.42	0	0.42	0	{'classifier__max_depth': None, 'classifier__min_samples_leaf': 1, 'classifier__min_samples_split': 10, 'classifier__n_estimators': 200}	1	standard	ltsa_lle	random_forest	0
0.34	0.02	0.42	0	0.42	0	{'classifier__max_depth': None, 'classifier__min_samples_leaf': 1, 'classifier__min_samples_split': 20, 'classifier__n_estimators': 50}	1	standard	ltsa_lle	random_forest	0
0.47	0.03	0.42	0	0.42	0	{'classifier__max_depth': None, 'classifier__min_samples_leaf': 1, 'classifier__min_samples_split': 20, 'classifier__n_estimators': 100}	1	standard	ltsa_lle	random_forest	0
0.75	0.04	0.42	0	0.42	0	{'classifier__max_depth': None, 'classifier__min_samples_leaf': 1, 'classifier__min_samples_split': 20, 'classifier__n_estimators': 200}	1	standard	ltsa_lle	random_forest	0
0.29	0.02	0.42	0	0.42	0	{'classifier__max_depth': None, 'classifier__min_samples_leaf': 5, 'classifier__min_samples_split': 2, 'classifier__n_estimators': 50}	1	standard	ltsa_lle	random_forest	0
0.46	0.03	0.42	0	0.42	0	{'classifier__max_depth': None, 'classifier__min_samples_leaf': 5, 'classifier__min_samples_split': 2, 'classifier__n_estimators': 100}	1	standard	ltsa_lle	random_forest	0
0.81	0.04	0.42	0	0.42	0	{'classifier__max_depth': None, 'classifier__min_samples_leaf': 5, 'classifier__min_samples_split': 2, 'classifier__n_estimators': 200}	1	standard	ltsa_lle	random_forest	0
0.31	0.02	0.42	0	0.42	0	{'classifier__max_depth': None, 'classifier__min_samples_leaf': 5, 'classifier__min_samples_split': 10, 'classifier__n_estimators': 50}	1	standard	ltsa_lle	random_forest	0
0.59	0.03	0.42	0	0.42	0	{'classifier__max_depth': None, 'classifier__min_samples_leaf': 5, 'classifier__min_samples_split': 10, 'classifier__n_estimators': 100}	1	standard	ltsa_lle	random_forest	0
0.77	0.03	0.42	0	0.42	0	{'classifier__max_depth': None, 'classifier__min_samples_leaf': 5, 'classifier__min_samples_split': 10, 'classifier__n_estimators': 200}	1	standard	ltsa_lle	random_forest	0
0.31	0.02	0.42	0	0.42	0	{'classifier__max_depth': None, 'classifier__min_samples_leaf': 5, 'classifier__min_samples_split': 20, 'classifier__n_estimators': 50}	1	standard	ltsa_lle	random_forest	0
0.52	0.03	0.42	0	0.42	0	{'classifier__max_depth': None, 'classifier__min_samples_leaf': 5, 'classifier__min_samples_split': 20, 'classifier__n_estimators': 100}	1	standard	ltsa_lle	random_forest	0
0.86	0.05	0.42	0	0.42	0	{'classifier__max_depth': None, 'classifier__min_samples_leaf': 5, 'classifier__min_samples_split': 20, 'classifier__n_estimators': 200}	1	standard	ltsa_lle	random_forest	0
0.34	0.03	0.42	0	0.42	0	{'classifier__max_depth': None, 'classifier__min_samples_leaf': 10, 'classifier__min_samples_split': 2, 'classifier__n_estimators': 50}	1	standard	ltsa_lle	random_forest	0
0.53	0.05	0.42	0	0.42	0	{'classifier__max_depth': None, 'classifier__min_samples_leaf': 10, 'classifier__min_samples_split': 2, 'classifier__n_estimators': 100}	1	standard	ltsa_lle	random_forest	0
0.84	0.04	0.42	0	0.42	0	{'classifier__max_depth': None, 'classifier__min_samples_leaf': 10, 'classifier__min_samples_split': 2, 'classifier__n_estimators': 200}	1	standard	ltsa_lle	random_forest	0
0.31	0.03	0.42	0	0.42	0	{'classifier__max_depth': None, 'classifier__min_samples_leaf': 10, 'classifier__min_samples_split': 10, 'classifier__n_estimators': 50}	1	standard	ltsa_lle	random_forest	0
0.45	0.03	0.42	0	0.42	0	{'classifier__max_depth': None, 'classifier__min_samples_leaf': 10, 'classifier__min_samples_split': 10, 'classifier__n_estimators': 100}	1	standard	ltsa_lle	random_forest	0
0.81	0.03	0.42	0	0.42	0	{'classifier__max_depth': None, 'classifier__min_samples_leaf': 10, 'classifier__min_samples_split': 10, 'classifier__n_estimators': 200}	1	standard	ltsa_lle	random_forest	0
0.3	0.02	0.42	0	0.42	0	{'classifier__max_depth': None, 'classifier__min_samples_leaf': 10, 'classifier__min_samples_split': 20, 'classifier__n_estimators': 50}	1	standard	ltsa_lle	random_forest	0
0.46	0.04	0.42	0	0.42	0	{'classifier__max_depth': None, 'classifier__min_samples_leaf': 10, 'classifier__min_samples_split': 20, 'classifier__n_estimators': 100}	1	standard	ltsa_lle	random_forest	0
0.79	0.04	0.42	0	0.42	0	{'classifier__max_depth': None, 'classifier__min_samples_leaf': 10, 'classifier__min_samples_split': 20, 'classifier__n_estimators': 200}	1	standard	ltsa_lle	random_forest	0
0.3	0.02	0.42	0	0.42	0	{'classifier__max_depth': 10, 'classifier__min_samples_leaf': 1, 'classifier__min_samples_split': 2, 'classifier__n_estimators': 50}	1	standard	ltsa_lle	random_forest	0
0.44	0.03	0.42	0	0.42	0	{'classifier__max_depth': 10, 'classifier__min_samples_leaf': 1, 'classifier__min_samples_split': 2, 'classifier__n_estimators': 100}	1	standard	ltsa_lle	random_forest	0
0.76	0.03	0.42	0	0.42	0	{'classifier__max_depth': 10, 'classifier__min_samples_leaf': 1, 'classifier__min_samples_split': 2, 'classifier__n_estimators': 200}	1	standard	ltsa_lle	random_forest	0
0.31	0.02	0.42	0	0.42	0	{'classifier__max_depth': 10, 'classifier__min_samples_leaf': 1, 'classifier__min_samples_split': 10, 'classifier__n_estimators': 50}	1	standard	ltsa_lle	random_forest	0
0.45	0.03	0.42	0	0.42	0	{'classifier__max_depth': 10, 'classifier__min_samples_leaf': 1, 'classifier__min_samples_split': 10, 'classifier__n_estimators': 100}	1	standard	ltsa_lle	random_forest	0
0.76	0.03	0.42	0	0.42	0	{'classifier__max_depth': 10, 'classifier__min_samples_leaf': 1, 'classifier__min_samples_split': 10, 'classifier__n_estimators': 200}	1	standard	ltsa_lle	random_forest	0
0.32	0.03	0.42	0	0.42	0	{'classifier__max_depth': 10, 'classifier__min_samples_leaf': 1, 'classifier__min_samples_split': 20, 'classifier__n_estimators': 50}	1	standard	ltsa_lle	random_forest	0
0.58	0.04	0.42	0	0.42	0	{'classifier__max_depth': 10, 'classifier__min_samples_leaf': 1, 'classifier__min_samples_split': 20, 'classifier__n_estimators': 100}	1	standard	ltsa_lle	random_forest	0
0.87	0.04	0.42	0	0.42	0	{'classifier__max_depth': 10, 'classifier__min_samples_leaf': 1, 'classifier__min_samples_split': 20, 'classifier__n_estimators': 200}	1	standard	ltsa_lle	random_forest	0
0.35	0.03	0.42	0	0.42	0	{'classifier__max_depth': 10, 'classifier__min_samples_leaf': 5, 'classifier__min_samples_split': 2, 'classifier__n_estimators': 50}	1	standard	ltsa_lle	random_forest	0
0.63	0.03	0.42	0	0.42	0	{'classifier__max_depth': 10, 'classifier__min_samples_leaf': 5, 'classifier__min_samples_split': 2, 'classifier__n_estimators': 100}	1	standard	ltsa_lle	random_forest	0
1.09	0.03	0.42	0	0.42	0	{'classifier__max_depth': 10, 'classifier__min_samples_leaf': 5, 'classifier__min_samples_split': 2, 'classifier__n_estimators': 200}	1	standard	ltsa_lle	random_forest	0
0.32	0.03	0.42	0	0.42	0	{'classifier__max_depth': 10, 'classifier__min_samples_leaf': 5, 'classifier__min_samples_split': 10, 'classifier__n_estimators': 50}	1	standard	ltsa_lle	random_forest	0
0.46	0.02	0.42	0	0.42	0	{'classifier__max_depth': 10, 'classifier__min_samples_leaf': 5, 'classifier__min_samples_split': 10, 'classifier__n_estimators': 100}	1	standard	ltsa_lle	random_forest	0
0.78	0.04	0.42	0	0.42	0	{'classifier__max_depth': 10, 'classifier__min_samples_leaf': 5, 'classifier__min_samples_split': 10, 'classifier__n_estimators': 200}	1	standard	ltsa_lle	random_forest	0
0.35	0.03	0.42	0	0.42	0	{'classifier__max_depth': 10, 'classifier__min_samples_leaf': 5, 'classifier__min_samples_split': 20, 'classifier__n_estimators': 50}	1	standard	ltsa_lle	random_forest	0
0.47	0.03	0.42	0	0.42	0	{'classifier__max_depth': 10, 'classifier__min_samples_leaf': 5, 'classifier__min_samples_split': 20, 'classifier__n_estimators': 100}	1	standard	ltsa_lle	random_forest	0
0.86	0.04	0.42	0	0.42	0	{'classifier__max_depth': 10, 'classifier__min_samples_leaf': 5, 'classifier__min_samples_split': 20, 'classifier__n_estimators': 200}	1	standard	ltsa_lle	random_forest	0
0.36	0.02	0.42	0	0.42	0	{'classifier__max_depth': 10, 'classifier__min_samples_leaf': 10, 'classifier__min_samples_split': 2, 'classifier__n_estimators': 50}	1	standard	ltsa_lle	random_forest	0
0.57	0.03	0.42	0	0.42	0	{'classifier__max_depth': 10, 'classifier__min_samples_leaf': 10, 'classifier__min_samples_split': 2, 'classifier__n_estimators': 100}	1	standard	ltsa_lle	random_forest	0
0.91	0.04	0.42	0	0.42	0	{'classifier__max_depth': 10, 'classifier__min_samples_leaf': 10, 'classifier__min_samples_split': 2, 'classifier__n_estimators': 200}	1	standard	ltsa_lle	random_forest	0
0.36	0.03	0.42	0	0.42	0	{'classifier__max_depth': 10, 'classifier__min_samples_leaf': 10, 'classifier__min_samples_split': 10, 'classifier__n_estimators': 50}	1	standard	ltsa_lle	random_forest	0
0.53	0.04	0.42	0	0.42	0	{'classifier__max_depth': 10, 'classifier__min_samples_leaf': 10, 'classifier__min_samples_split': 10, 'classifier__n_estimators': 100}	1	standard	ltsa_lle	random_forest	0
0.91	0.02	0.42	0	0.42	0	{'classifier__max_depth': 10, 'classifier__min_samples_leaf': 10, 'classifier__min_samples_split': 10, 'classifier__n_estimators': 200}	1	standard	ltsa_lle	random_forest	0
0.34	0.03	0.42	0	0.42	0	{'classifier__max_depth': 10, 'classifier__min_samples_leaf': 10, 'classifier__min_samples_split': 20, 'classifier__n_estimators': 50}	1	standard	ltsa_lle	random_forest	0
0.53	0.03	0.42	0	0.42	0	{'classifier__max_depth': 10, 'classifier__min_samples_leaf': 10, 'classifier__min_samples_split': 20, 'classifier__n_estimators': 100}	1	standard	ltsa_lle	random_forest	0
0.87	0.05	0.42	0	0.42	0	{'classifier__max_depth': 10, 'classifier__min_samples_leaf': 10, 'classifier__min_samples_split': 20, 'classifier__n_estimators': 200}	1	standard	ltsa_lle	random_forest	0
0.36	0.03	0.42	0	0.42	0	{'classifier__max_depth': 20, 'classifier__min_samples_leaf': 1, 'classifier__min_samples_split': 2, 'classifier__n_estimators': 50}	1	standard	ltsa_lle	random_forest	0
0.52	0.04	0.42	0	0.42	0	{'classifier__max_depth': 20, 'classifier__min_samples_leaf': 1, 'classifier__min_samples_split': 2, 'classifier__n_estimators': 100}	1	standard	ltsa_lle	random_forest	0
0.83	0.04	0.42	0	0.42	0	{'classifier__max_depth': 20, 'classifier__min_samples_leaf': 1, 'classifier__min_samples_split': 2, 'classifier__n_estimators': 200}	1	standard	ltsa_lle	random_forest	0
0.31	0.03	0.42	0	0.42	0	{'classifier__max_depth': 20, 'classifier__min_samples_leaf': 1, 'classifier__min_samples_split': 10, 'classifier__n_estimators': 50}	1	standard	ltsa_lle	random_forest	0
0.46	0.03	0.42	0	0.42	0	{'classifier__max_depth': 20, 'classifier__min_samples_leaf': 1, 'classifier__min_samples_split': 10, 'classifier__n_estimators': 100}	1	standard	ltsa_lle	random_forest	0
0.77	0.04	0.42	0	0.42	0	{'classifier__max_depth': 20, 'classifier__min_samples_leaf': 1, 'classifier__min_samples_split': 10, 'classifier__n_estimators': 200}	1	standard	ltsa_lle	random_forest	0
0.3	0.03	0.42	0	0.42	0	{'classifier__max_depth': 20, 'classifier__min_samples_leaf': 1, 'classifier__min_samples_split': 20, 'classifier__n_estimators': 50}	1	standard	ltsa_lle	random_forest	0
0.46	0.03	0.42	0	0.42	0	{'classifier__max_depth': 20, 'classifier__min_samples_leaf': 1, 'classifier__min_samples_split': 20, 'classifier__n_estimators': 100}	1	standard	ltsa_lle	random_forest	0
0.78	0.04	0.42	0	0.42	0	{'classifier__max_depth': 20, 'classifier__min_samples_leaf': 1, 'classifier__min_samples_split': 20, 'classifier__n_estimators': 200}	1	standard	ltsa_lle	random_forest	0
0.29	0.03	0.42	0	0.42	0	{'classifier__max_depth': 20, 'classifier__min_samples_leaf': 5, 'classifier__min_samples_split': 2, 'classifier__n_estimators': 50}	1	standard	ltsa_lle	random_forest	0
0.44	0.03	0.42	0	0.42	0	{'classifier__max_depth': 20, 'classifier__min_samples_leaf': 5, 'classifier__min_samples_split': 2, 'classifier__n_estimators': 100}	1	standard	ltsa_lle	random_forest	0
0.73	0.05	0.42	0	0.42	0	{'classifier__max_depth': 20, 'classifier__min_samples_leaf': 5, 'classifier__min_samples_split': 2, 'classifier__n_estimators': 200}	1	standard	ltsa_lle	random_forest	0
0.31	0.02	0.42	0	0.42	0	{'classifier__max_depth': 20, 'classifier__min_samples_leaf': 5, 'classifier__min_samples_split': 10, 'classifier__n_estimators': 50}	1	standard	ltsa_lle	random_forest	0
0.43	0.03	0.42	0	0.42	0	{'classifier__max_depth': 20, 'classifier__min_samples_leaf': 5, 'classifier__min_samples_split': 10, 'classifier__n_estimators': 100}	1	standard	ltsa_lle	random_forest	0
0.74	0.04	0.42	0	0.42	0	{'classifier__max_depth': 20, 'classifier__min_samples_leaf': 5, 'classifier__min_samples_split': 10, 'classifier__n_estimators': 200}	1	standard	ltsa_lle	random_forest	0
0.29	0.04	0.42	0	0.42	0	{'classifier__max_depth': 20, 'classifier__min_samples_leaf': 5, 'classifier__min_samples_split': 20, 'classifier__n_estimators': 50}	1	standard	ltsa_lle	random_forest	0
0.45	0.03	0.42	0	0.42	0	{'classifier__max_depth': 20, 'classifier__min_samples_leaf': 5, 'classifier__min_samples_split': 20, 'classifier__n_estimators': 100}	1	standard	ltsa_lle	random_forest	0
0.74	0.04	0.42	0	0.42	0	{'classifier__max_depth': 20, 'classifier__min_samples_leaf': 5, 'classifier__min_samples_split': 20, 'classifier__n_estimators': 200}	1	standard	ltsa_lle	random_forest	0
0.3	0.02	0.42	0	0.42	0	{'classifier__max_depth': 20, 'classifier__min_samples_leaf': 10, 'classifier__min_samples_split': 2, 'classifier__n_estimators': 50}	1	standard	ltsa_lle	random_forest	0
0.45	0.02	0.42	0	0.42	0	{'classifier__max_depth': 20, 'classifier__min_samples_leaf': 10, 'classifier__min_samples_split': 2, 'classifier__n_estimators': 100}	1	standard	ltsa_lle	random_forest	0
0.74	0.03	0.42	0	0.42	0	{'classifier__max_depth': 20, 'classifier__min_samples_leaf': 10, 'classifier__min_samples_split': 2, 'classifier__n_estimators': 200}	1	standard	ltsa_lle	random_forest	0
0.29	0.02	0.42	0	0.42	0	{'classifier__max_depth': 20, 'classifier__min_samples_leaf': 10, 'classifier__min_samples_split': 10, 'classifier__n_estimators': 50}	1	standard	ltsa_lle	random_forest	0
0.43	0.03	0.42	0	0.42	0	{'classifier__max_depth': 20, 'classifier__min_samples_leaf': 10, 'classifier__min_samples_split': 10, 'classifier__n_estimators': 100}	1	standard	ltsa_lle	random_forest	0
0.71	0.04	0.42	0	0.42	0	{'classifier__max_depth': 20, 'classifier__min_samples_leaf': 10, 'classifier__min_samples_split': 10, 'classifier__n_estimators': 200}	1	standard	ltsa_lle	random_forest	0
0.29	0.02	0.42	0	0.42	0	{'classifier__max_depth': 20, 'classifier__min_samples_leaf': 10, 'classifier__min_samples_split': 20, 'classifier__n_estimators': 50}	1	standard	ltsa_lle	random_forest	0
0.44	0.03	0.42	0	0.42	0	{'classifier__max_depth': 20, 'classifier__min_samples_leaf': 10, 'classifier__min_samples_split': 20, 'classifier__n_estimators': 100}	1	standard	ltsa_lle	random_forest	0
0.65	0.02	0.42	0	0.42	0	{'classifier__max_depth': 20, 'classifier__min_samples_leaf': 10, 'classifier__min_samples_split': 20, 'classifier__n_estimators': 200}	1	standard	ltsa_lle	random_forest	0
0.1	0.01	0.42	0	0.42	0	{'classifier__max_depth': 5, 'classifier__min_samples_leaf': 1, 'classifier__min_samples_split': 2}	1	standard	ltsa_lle	decision_tree	0
0.13	0.01	0.42	0	0.42	0	{'classifier__max_depth': 5, 'classifier__min_samples_leaf': 1, 'classifier__min_samples_split': 10}	1	standard	ltsa_lle	decision_tree	0
0.14	0.01	0.42	0	0.42	0	{'classifier__max_depth': 5, 'classifier__min_samples_leaf': 1, 'classifier__min_samples_split': 20}	1	standard	ltsa_lle	decision_tree	0
0.13	0.01	0.42	0	0.42	0	{'classifier__max_depth': 5, 'classifier__min_samples_leaf': 5, 'classifier__min_samples_split': 2}	1	standard	ltsa_lle	decision_tree	0
0.13	0.01	0.42	0	0.42	0	{'classifier__max_depth': 5, 'classifier__min_samples_leaf': 5, 'classifier__min_samples_split': 10}	1	standard	ltsa_lle	decision_tree	0
0.14	0.01	0.42	0	0.42	0	{'classifier__max_depth': 5, 'classifier__min_samples_leaf': 5, 'classifier__min_samples_split': 20}	1	standard	ltsa_lle	decision_tree	0
0.12	0.02	0.42	0	0.42	0	{'classifier__max_depth': 5, 'classifier__min_samples_leaf': 10, 'classifier__min_samples_split': 2}	1	standard	ltsa_lle	decision_tree	0
0.13	0.01	0.42	0	0.42	0	{'classifier__max_depth': 5, 'classifier__min_samples_leaf': 10, 'classifier__min_samples_split': 10}	1	standard	ltsa_lle	decision_tree	0
0.13	0.02	0.42	0	0.42	0	{'classifier__max_depth': 5, 'classifier__min_samples_leaf': 10, 'classifier__min_samples_split': 20}	1	standard	ltsa_lle	decision_tree	0
0.17	0.01	0.42	0	0.42	0	{'classifier__max_depth': 10, 'classifier__min_samples_leaf': 1, 'classifier__min_samples_split': 2}	1	standard	ltsa_lle	decision_tree	0
0.14	0.02	0.42	0	0.42	0	{'classifier__max_depth': 10, 'classifier__min_samples_leaf': 1, 'classifier__min_samples_split': 10}	1	standard	ltsa_lle	decision_tree	0
0.13	0.02	0.42	0	0.42	0	{'classifier__max_depth': 10, 'classifier__min_samples_leaf': 1, 'classifier__min_samples_split': 20}	1	standard	ltsa_lle	decision_tree	0
0.15	0.02	0.42	0	0.42	0	{'classifier__max_depth': 10, 'classifier__min_samples_leaf': 5, 'classifier__min_samples_split': 2}	1	standard	ltsa_lle	decision_tree	0
0.17	0.01	0.42	0	0.42	0	{'classifier__max_depth': 10, 'classifier__min_samples_leaf': 5, 'classifier__min_samples_split': 10}	1	standard	ltsa_lle	decision_tree	0
0.16	0.02	0.42	0	0.42	0	{'classifier__max_depth': 10, 'classifier__min_samples_leaf': 5, 'classifier__min_samples_split': 20}	1	standard	ltsa_lle	decision_tree	0
0.14	0.01	0.42	0	0.42	0	{'classifier__max_depth': 10, 'classifier__min_samples_leaf': 10, 'classifier__min_samples_split': 2}	1	standard	ltsa_lle	decision_tree	0
0.15	0.02	0.42	0	0.42	0	{'classifier__max_depth': 10, 'classifier__min_samples_leaf': 10, 'classifier__min_samples_split': 10}	1	standard	ltsa_lle	decision_tree	0
0.14	0.02	0.42	0	0.42	0	{'classifier__max_depth': 10, 'classifier__min_samples_leaf': 10, 'classifier__min_samples_split': 20}	1	standard	ltsa_lle	decision_tree	0
0.13	0.02	0.42	0	0.42	0	{'classifier__max_depth': 20, 'classifier__min_samples_leaf': 1, 'classifier__min_samples_split': 2}	1	standard	ltsa_lle	decision_tree	0
0.14	0.01	0.42	0	0.42	0	{'classifier__max_depth': 20, 'classifier__min_samples_leaf': 1, 'classifier__min_samples_split': 10}	1	standard	ltsa_lle	decision_tree	0
0.14	0.01	0.42	0	0.42	0	{'classifier__max_depth': 20, 'classifier__min_samples_leaf': 1, 'classifier__min_samples_split': 20}	1	standard	ltsa_lle	decision_tree	0
0.14	0.01	0.42	0	0.42	0	{'classifier__max_depth': 20, 'classifier__min_samples_leaf': 5, 'classifier__min_samples_split': 2}	1	standard	ltsa_lle	decision_tree	0
0.14	0.02	0.42	0	0.42	0	{'classifier__max_depth': 20, 'classifier__min_samples_leaf': 5, 'classifier__min_samples_split': 10}	1	standard	ltsa_lle	decision_tree	0
0.14	0.01	0.42	0	0.42	0	{'classifier__max_depth': 20, 'classifier__min_samples_leaf': 5, 'classifier__min_samples_split': 20}	1	standard	ltsa_lle	decision_tree	0
0.15	0.02	0.42	0	0.42	0	{'classifier__max_depth': 20, 'classifier__min_samples_leaf': 10, 'classifier__min_samples_split': 2}	1	standard	ltsa_lle	decision_tree	0
0.14	0.01	0.42	0	0.42	0	{'classifier__max_depth': 20, 'classifier__min_samples_leaf': 10, 'classifier__min_samples_split': 10}	1	standard	ltsa_lle	decision_tree	0
0.14	0.02	0.42	0	0.42	0	{'classifier__max_depth': 20, 'classifier__min_samples_leaf': 10, 'classifier__min_samples_split': 20}	1	standard	ltsa_lle	decision_tree	0
0.07	0.01	0.42	0	0.42	0	{'classifier__C': 0.1, 'classifier__gamma': 'scale'}	1	robust	pca	svm_sigmoid	0
0.06	0.01	0.41	0.02	0.42	0.01	{'classifier__C': 0.1, 'classifier__penalty': 'l1', 'classifier__solver': 'liblinear'}	1	robust	pca	logistic_regression	0.01
0.16	0.01	0.41	0.01	0.42	0.01	{'classifier__C': 1, 'classifier__gamma': 'scale'}	1	robust	ica	svm_linear	0.01
0.21	0.01	0.41	0.01	0.42	0.01	{'classifier__C': 1, 'classifier__gamma': 'auto'}	1	robust	ica	svm_linear	0.01
0.08	0.01	0.42	0	0.42	0	{'classifier__C': 0.1, 'classifier__gamma': 'scale'}	1	robust	ica	svm_sigmoid	0
0.06	0.01	0.42	0	0.42	0	{'classifier__C': 0.1, 'classifier__gamma': 'auto'}	1	robust	ica	svm_sigmoid	0
0.08	0.01	0.42	0.01	0.42	0	{'classifier__C': 0.1, 'classifier__penalty': 'l1', 'classifier__solver': 'liblinear'}	1	robust	ica	logistic_regression	0
0.11	0	0.41	0.02	0.42	0.01	{'classifier__C': 0.1, 'classifier__penalty': 'l2', 'classifier__solver': 'liblinear'}	2	robust	ica	logistic_regression	0.01
0.05	0.01	0.42	0	0.42	0	{'classifier__C': 0.1, 'classifier__gamma': 'scale'}	1	robust	random_projection	svm_sigmoid	0
0.08	0.02	0.41	0.01	0.42	0.01	{'classifier__C': 0.1, 'classifier__gamma': 'scale'}	1	robust	truncatedsvd	svm_linear	0.01
0.07	0.01	0.41	0.01	0.42	0.01	{'classifier__C': 0.1, 'classifier__gamma': 'auto'}	1	robust	truncatedsvd	svm_linear	0.01
0.08	0.02	0.42	0	0.42	0	{'classifier__C': 0.1, 'classifier__gamma': 'scale'}	1	robust	truncatedsvd	svm_sigmoid	0
0.07	0.01	0.42	0	0.42	0	{'classifier__C': 0.1, 'classifier__gamma': 'auto'}	1	robust	truncatedsvd	svm_sigmoid	0
0.04	0.01	0.41	0.02	0.42	0.01	{'classifier__C': 0.1, 'classifier__penalty': 'l1', 'classifier__solver': 'liblinear'}	1	robust	truncatedsvd	logistic_regression	0.01
0.18	0.01	0.42	0	0.42	0	{'classifier__C': 0.1, 'classifier__gamma': 'scale'}	1	robust	modified_lle	svm_linear	0
0.16	0.01	0.42	0	0.42	0	{'classifier__C': 0.1, 'classifier__gamma': 'auto'}	1	robust	modified_lle	svm_linear	0
0.16	0.02	0.42	0	0.42	0	{'classifier__C': 1, 'classifier__gamma': 'scale'}	1	robust	modified_lle	svm_linear	0
0.18	0.01	0.42	0	0.42	0	{'classifier__C': 1, 'classifier__gamma': 'auto'}	1	robust	modified_lle	svm_linear	0
0.17	0.02	0.42	0	0.42	0	{'classifier__C': 0.1, 'classifier__gamma': 'scale'}	2	robust	modified_lle	svm_sigmoid	0
0.17	0.03	0.42	0	0.42	0	{'classifier__C': 0.1, 'classifier__gamma': 'auto'}	2	robust	modified_lle	svm_sigmoid	0
0.21	0.03	0.42	0.01	0.42	0.02	{'classifier__C': 1, 'classifier__gamma': 'scale'}	1	robust	modified_lle	svm_sigmoid	0
0.2	0.02	0.42	0	0.42	0	{'classifier__C': 1, 'classifier__gamma': 'auto'}	2	robust	modified_lle	svm_sigmoid	0
0.21	0.02	0.42	0	0.42	0	{'classifier__C': 0.1, 'classifier__penalty': 'l1', 'classifier__solver': 'liblinear'}	2	robust	modified_lle	logistic_regression	0
0.17	0.02	0.42	0	0.42	0	{'classifier__C': 0.1, 'classifier__penalty': 'l2', 'classifier__solver': 'liblinear'}	2	robust	modified_lle	logistic_regression	0
0.19	0.01	0.42	0	0.42	0	{'classifier__C': 1, 'classifier__penalty': 'l1', 'classifier__solver': 'liblinear'}	2	robust	modified_lle	logistic_regression	0
0.19	0.01	0.42	0	0.42	0	{'classifier__C': 1, 'classifier__penalty': 'l2', 'classifier__solver': 'liblinear'}	2	robust	modified_lle	logistic_regression	0
0.31	0.01	0.42	0	0.42	0	{'classifier__max_depth': None, 'classifier__min_samples_leaf': 1, 'classifier__min_samples_split': 2, 'classifier__n_estimators': 50}	1	robust	ltsa_lle	random_forest	0
0.54	0.03	0.42	0	0.42	0	{'classifier__max_depth': None, 'classifier__min_samples_leaf': 1, 'classifier__min_samples_split': 2, 'classifier__n_estimators': 100}	1	robust	ltsa_lle	random_forest	0
0.82	0.04	0.42	0	0.42	0	{'classifier__max_depth': None, 'classifier__min_samples_leaf': 1, 'classifier__min_samples_split': 2, 'classifier__n_estimators': 200}	1	robust	ltsa_lle	random_forest	0
0.4	0.02	0.42	0	0.42	0	{'classifier__max_depth': None, 'classifier__min_samples_leaf': 1, 'classifier__min_samples_split': 10, 'classifier__n_estimators': 50}	1	robust	ltsa_lle	random_forest	0
0.49	0.02	0.42	0	0.42	0	{'classifier__max_depth': None, 'classifier__min_samples_leaf': 1, 'classifier__min_samples_split': 10, 'classifier__n_estimators': 100}	1	robust	ltsa_lle	random_forest	0
0.85	0.05	0.42	0	0.42	0	{'classifier__max_depth': None, 'classifier__min_samples_leaf': 1, 'classifier__min_samples_split': 10, 'classifier__n_estimators': 200}	1	robust	ltsa_lle	random_forest	0
0.34	0.03	0.42	0	0.42	0	{'classifier__max_depth': None, 'classifier__min_samples_leaf': 1, 'classifier__min_samples_split': 20, 'classifier__n_estimators': 50}	1	robust	ltsa_lle	random_forest	0
0.5	0.04	0.42	0	0.42	0	{'classifier__max_depth': None, 'classifier__min_samples_leaf': 1, 'classifier__min_samples_split': 20, 'classifier__n_estimators': 100}	1	robust	ltsa_lle	random_forest	0
0.84	0.04	0.42	0	0.42	0	{'classifier__max_depth': None, 'classifier__min_samples_leaf': 1, 'classifier__min_samples_split': 20, 'classifier__n_estimators': 200}	1	robust	ltsa_lle	random_forest	0
0.35	0.03	0.42	0	0.42	0	{'classifier__max_depth': None, 'classifier__min_samples_leaf': 5, 'classifier__min_samples_split': 2, 'classifier__n_estimators': 50}	1	robust	ltsa_lle	random_forest	0
0.46	0.03	0.42	0	0.42	0	{'classifier__max_depth': None, 'classifier__min_samples_leaf': 5, 'classifier__min_samples_split': 2, 'classifier__n_estimators': 100}	1	robust	ltsa_lle	random_forest	0
0.76	0.04	0.42	0	0.42	0	{'classifier__max_depth': None, 'classifier__min_samples_leaf': 5, 'classifier__min_samples_split': 2, 'classifier__n_estimators': 200}	1	robust	ltsa_lle	random_forest	0
0.32	0.02	0.42	0	0.42	0	{'classifier__max_depth': None, 'classifier__min_samples_leaf': 5, 'classifier__min_samples_split': 10, 'classifier__n_estimators': 50}	1	robust	ltsa_lle	random_forest	0
0.46	0.03	0.42	0	0.42	0	{'classifier__max_depth': None, 'classifier__min_samples_leaf': 5, 'classifier__min_samples_split': 10, 'classifier__n_estimators': 100}	1	robust	ltsa_lle	random_forest	0
0.78	0.03	0.42	0	0.42	0	{'classifier__max_depth': None, 'classifier__min_samples_leaf': 5, 'classifier__min_samples_split': 10, 'classifier__n_estimators': 200}	1	robust	ltsa_lle	random_forest	0
0.32	0.02	0.42	0	0.42	0	{'classifier__max_depth': None, 'classifier__min_samples_leaf': 5, 'classifier__min_samples_split': 20, 'classifier__n_estimators': 50}	1	robust	ltsa_lle	random_forest	0
0.49	0.03	0.42	0	0.42	0	{'classifier__max_depth': None, 'classifier__min_samples_leaf': 5, 'classifier__min_samples_split': 20, 'classifier__n_estimators': 100}	1	robust	ltsa_lle	random_forest	0
0.82	0.04	0.42	0	0.42	0	{'classifier__max_depth': None, 'classifier__min_samples_leaf': 5, 'classifier__min_samples_split': 20, 'classifier__n_estimators': 200}	1	robust	ltsa_lle	random_forest	0
0.34	0.03	0.42	0	0.42	0	{'classifier__max_depth': None, 'classifier__min_samples_leaf': 10, 'classifier__min_samples_split': 2, 'classifier__n_estimators': 50}	1	robust	ltsa_lle	random_forest	0
0.49	0.02	0.42	0	0.42	0	{'classifier__max_depth': None, 'classifier__min_samples_leaf': 10, 'classifier__min_samples_split': 2, 'classifier__n_estimators': 100}	1	robust	ltsa_lle	random_forest	0
0.8	0.04	0.42	0	0.42	0	{'classifier__max_depth': None, 'classifier__min_samples_leaf': 10, 'classifier__min_samples_split': 2, 'classifier__n_estimators': 200}	1	robust	ltsa_lle	random_forest	0
0.34	0.02	0.42	0	0.42	0	{'classifier__max_depth': None, 'classifier__min_samples_leaf': 10, 'classifier__min_samples_split': 10, 'classifier__n_estimators': 50}	1	robust	ltsa_lle	random_forest	0
0.49	0.03	0.42	0	0.42	0	{'classifier__max_depth': None, 'classifier__min_samples_leaf': 10, 'classifier__min_samples_split': 10, 'classifier__n_estimators': 100}	1	robust	ltsa_lle	random_forest	0
0.8	0.05	0.42	0	0.42	0	{'classifier__max_depth': None, 'classifier__min_samples_leaf': 10, 'classifier__min_samples_split': 10, 'classifier__n_estimators': 200}	1	robust	ltsa_lle	random_forest	0
0.33	0.03	0.42	0	0.42	0	{'classifier__max_depth': None, 'classifier__min_samples_leaf': 10, 'classifier__min_samples_split': 20, 'classifier__n_estimators': 50}	1	robust	ltsa_lle	random_forest	0
0.49	0.03	0.42	0	0.42	0	{'classifier__max_depth': None, 'classifier__min_samples_leaf': 10, 'classifier__min_samples_split': 20, 'classifier__n_estimators': 100}	1	robust	ltsa_lle	random_forest	0
0.87	0.03	0.42	0	0.42	0	{'classifier__max_depth': None, 'classifier__min_samples_leaf': 10, 'classifier__min_samples_split': 20, 'classifier__n_estimators': 200}	1	robust	ltsa_lle	random_forest	0
0.35	0.03	0.42	0	0.42	0	{'classifier__max_depth': 10, 'classifier__min_samples_leaf': 1, 'classifier__min_samples_split': 2, 'classifier__n_estimators': 50}	1	robust	ltsa_lle	random_forest	0
0.52	0.03	0.42	0	0.42	0	{'classifier__max_depth': 10, 'classifier__min_samples_leaf': 1, 'classifier__min_samples_split': 2, 'classifier__n_estimators': 100}	1	robust	ltsa_lle	random_forest	0
0.84	0.04	0.42	0	0.42	0	{'classifier__max_depth': 10, 'classifier__min_samples_leaf': 1, 'classifier__min_samples_split': 2, 'classifier__n_estimators': 200}	1	robust	ltsa_lle	random_forest	0
0.36	0.02	0.42	0	0.42	0	{'classifier__max_depth': 10, 'classifier__min_samples_leaf': 1, 'classifier__min_samples_split': 10, 'classifier__n_estimators': 50}	1	robust	ltsa_lle	random_forest	0
0.53	0.03	0.42	0	0.42	0	{'classifier__max_depth': 10, 'classifier__min_samples_leaf': 1, 'classifier__min_samples_split': 10, 'classifier__n_estimators': 100}	1	robust	ltsa_lle	random_forest	0
0.88	0.03	0.42	0	0.42	0	{'classifier__max_depth': 10, 'classifier__min_samples_leaf': 1, 'classifier__min_samples_split': 10, 'classifier__n_estimators': 200}	1	robust	ltsa_lle	random_forest	0
0.36	0.02	0.42	0	0.42	0	{'classifier__max_depth': 10, 'classifier__min_samples_leaf': 1, 'classifier__min_samples_split': 20, 'classifier__n_estimators': 50}	1	robust	ltsa_lle	random_forest	0
0.53	0.03	0.42	0	0.42	0	{'classifier__max_depth': 10, 'classifier__min_samples_leaf': 1, 'classifier__min_samples_split': 20, 'classifier__n_estimators': 100}	1	robust	ltsa_lle	random_forest	0
0.87	0.05	0.42	0	0.42	0	{'classifier__max_depth': 10, 'classifier__min_samples_leaf': 1, 'classifier__min_samples_split': 20, 'classifier__n_estimators': 200}	1	robust	ltsa_lle	random_forest	0
0.37	0.04	0.42	0	0.42	0	{'classifier__max_depth': 10, 'classifier__min_samples_leaf': 5, 'classifier__min_samples_split': 2, 'classifier__n_estimators': 50}	1	robust	ltsa_lle	random_forest	0
0.56	0.04	0.42	0	0.42	0	{'classifier__max_depth': 10, 'classifier__min_samples_leaf': 5, 'classifier__min_samples_split': 2, 'classifier__n_estimators': 100}	1	robust	ltsa_lle	random_forest	0
0.89	0.03	0.42	0	0.42	0	{'classifier__max_depth': 10, 'classifier__min_samples_leaf': 5, 'classifier__min_samples_split': 2, 'classifier__n_estimators': 200}	1	robust	ltsa_lle	random_forest	0
0.37	0.03	0.42	0	0.42	0	{'classifier__max_depth': 10, 'classifier__min_samples_leaf': 5, 'classifier__min_samples_split': 10, 'classifier__n_estimators': 50}	1	robust	ltsa_lle	random_forest	0
0.63	0.03	0.42	0	0.42	0	{'classifier__max_depth': 10, 'classifier__min_samples_leaf': 5, 'classifier__min_samples_split': 10, 'classifier__n_estimators': 100}	1	robust	ltsa_lle	random_forest	0
0.9	0.03	0.42	0	0.42	0	{'classifier__max_depth': 10, 'classifier__min_samples_leaf': 5, 'classifier__min_samples_split': 10, 'classifier__n_estimators': 200}	1	robust	ltsa_lle	random_forest	0
0.37	0.03	0.42	0	0.42	0	{'classifier__max_depth': 10, 'classifier__min_samples_leaf': 5, 'classifier__min_samples_split': 20, 'classifier__n_estimators': 50}	1	robust	ltsa_lle	random_forest	0
0.56	0.04	0.42	0	0.42	0	{'classifier__max_depth': 10, 'classifier__min_samples_leaf': 5, 'classifier__min_samples_split': 20, 'classifier__n_estimators': 100}	1	robust	ltsa_lle	random_forest	0
0.92	0.04	0.42	0	0.42	0	{'classifier__max_depth': 10, 'classifier__min_samples_leaf': 5, 'classifier__min_samples_split': 20, 'classifier__n_estimators': 200}	1	robust	ltsa_lle	random_forest	0
0.36	0.03	0.42	0	0.42	0	{'classifier__max_depth': 10, 'classifier__min_samples_leaf': 10, 'classifier__min_samples_split': 2, 'classifier__n_estimators': 50}	1	robust	ltsa_lle	random_forest	0
0.55	0.03	0.42	0	0.42	0	{'classifier__max_depth': 10, 'classifier__min_samples_leaf': 10, 'classifier__min_samples_split': 2, 'classifier__n_estimators': 100}	1	robust	ltsa_lle	random_forest	0
0.88	0.04	0.42	0	0.42	0	{'classifier__max_depth': 10, 'classifier__min_samples_leaf': 10, 'classifier__min_samples_split': 2, 'classifier__n_estimators': 200}	1	robust	ltsa_lle	random_forest	0
0.36	0.03	0.42	0	0.42	0	{'classifier__max_depth': 10, 'classifier__min_samples_leaf': 10, 'classifier__min_samples_split': 10, 'classifier__n_estimators': 50}	1	robust	ltsa_lle	random_forest	0
0.56	0.02	0.42	0	0.42	0	{'classifier__max_depth': 10, 'classifier__min_samples_leaf': 10, 'classifier__min_samples_split': 10, 'classifier__n_estimators': 100}	1	robust	ltsa_lle	random_forest	0
0.93	0.05	0.42	0	0.42	0	{'classifier__max_depth': 10, 'classifier__min_samples_leaf': 10, 'classifier__min_samples_split': 10, 'classifier__n_estimators': 200}	1	robust	ltsa_lle	random_forest	0
0.39	0.02	0.42	0	0.42	0	{'classifier__max_depth': 10, 'classifier__min_samples_leaf': 10, 'classifier__min_samples_split': 20, 'classifier__n_estimators': 50}	1	robust	ltsa_lle	random_forest	0
0.57	0.03	0.42	0	0.42	0	{'classifier__max_depth': 10, 'classifier__min_samples_leaf': 10, 'classifier__min_samples_split': 20, 'classifier__n_estimators': 100}	1	robust	ltsa_lle	random_forest	0
0.93	0.05	0.42	0	0.42	0	{'classifier__max_depth': 10, 'classifier__min_samples_leaf': 10, 'classifier__min_samples_split': 20, 'classifier__n_estimators': 200}	1	robust	ltsa_lle	random_forest	0
0.39	0.03	0.42	0	0.42	0	{'classifier__max_depth': 20, 'classifier__min_samples_leaf': 1, 'classifier__min_samples_split': 2, 'classifier__n_estimators': 50}	1	robust	ltsa_lle	random_forest	0
0.58	0.04	0.42	0	0.42	0	{'classifier__max_depth': 20, 'classifier__min_samples_leaf': 1, 'classifier__min_samples_split': 2, 'classifier__n_estimators': 100}	1	robust	ltsa_lle	random_forest	0
0.92	0.05	0.42	0	0.42	0	{'classifier__max_depth': 20, 'classifier__min_samples_leaf': 1, 'classifier__min_samples_split': 2, 'classifier__n_estimators': 200}	1	robust	ltsa_lle	random_forest	0
0.39	0.03	0.42	0	0.42	0	{'classifier__max_depth': 20, 'classifier__min_samples_leaf': 1, 'classifier__min_samples_split': 10, 'classifier__n_estimators': 50}	1	robust	ltsa_lle	random_forest	0
0.56	0.03	0.42	0	0.42	0	{'classifier__max_depth': 20, 'classifier__min_samples_leaf': 1, 'classifier__min_samples_split': 10, 'classifier__n_estimators': 100}	1	robust	ltsa_lle	random_forest	0
0.91	0.04	0.42	0	0.42	0	{'classifier__max_depth': 20, 'classifier__min_samples_leaf': 1, 'classifier__min_samples_split': 10, 'classifier__n_estimators': 200}	1	robust	ltsa_lle	random_forest	0
0.37	0.03	0.42	0	0.42	0	{'classifier__max_depth': 20, 'classifier__min_samples_leaf': 1, 'classifier__min_samples_split': 20, 'classifier__n_estimators': 50}	1	robust	ltsa_lle	random_forest	0
0.55	0.02	0.42	0	0.42	0	{'classifier__max_depth': 20, 'classifier__min_samples_leaf': 1, 'classifier__min_samples_split': 20, 'classifier__n_estimators': 100}	1	robust	ltsa_lle	random_forest	0
0.88	0.04	0.42	0	0.42	0	{'classifier__max_depth': 20, 'classifier__min_samples_leaf': 1, 'classifier__min_samples_split': 20, 'classifier__n_estimators': 200}	1	robust	ltsa_lle	random_forest	0
0.39	0.03	0.42	0	0.42	0	{'classifier__max_depth': 20, 'classifier__min_samples_leaf': 5, 'classifier__min_samples_split': 2, 'classifier__n_estimators': 50}	1	robust	ltsa_lle	random_forest	0
0.55	0.03	0.42	0	0.42	0	{'classifier__max_depth': 20, 'classifier__min_samples_leaf': 5, 'classifier__min_samples_split': 2, 'classifier__n_estimators': 100}	1	robust	ltsa_lle	random_forest	0
0.89	0.04	0.42	0	0.42	0	{'classifier__max_depth': 20, 'classifier__min_samples_leaf': 5, 'classifier__min_samples_split': 2, 'classifier__n_estimators': 200}	1	robust	ltsa_lle	random_forest	0
0.37	0.03	0.42	0	0.42	0	{'classifier__max_depth': 20, 'classifier__min_samples_leaf': 5, 'classifier__min_samples_split': 10, 'classifier__n_estimators': 50}	1	robust	ltsa_lle	random_forest	0
0.52	0.03	0.42	0	0.42	0	{'classifier__max_depth': 20, 'classifier__min_samples_leaf': 5, 'classifier__min_samples_split': 10, 'classifier__n_estimators': 100}	1	robust	ltsa_lle	random_forest	0
0.86	0.04	0.42	0	0.42	0	{'classifier__max_depth': 20, 'classifier__min_samples_leaf': 5, 'classifier__min_samples_split': 10, 'classifier__n_estimators': 200}	1	robust	ltsa_lle	random_forest	0
0.35	0.03	0.42	0	0.42	0	{'classifier__max_depth': 20, 'classifier__min_samples_leaf': 5, 'classifier__min_samples_split': 20, 'classifier__n_estimators': 50}	1	robust	ltsa_lle	random_forest	0
0.53	0.03	0.42	0	0.42	0	{'classifier__max_depth': 20, 'classifier__min_samples_leaf': 5, 'classifier__min_samples_split': 20, 'classifier__n_estimators': 100}	1	robust	ltsa_lle	random_forest	0
0.84	0.05	0.42	0	0.42	0	{'classifier__max_depth': 20, 'classifier__min_samples_leaf': 5, 'classifier__min_samples_split': 20, 'classifier__n_estimators': 200}	1	robust	ltsa_lle	random_forest	0
0.36	0.03	0.42	0	0.42	0	{'classifier__max_depth': 20, 'classifier__min_samples_leaf': 10, 'classifier__min_samples_split': 2, 'classifier__n_estimators': 50}	1	robust	ltsa_lle	random_forest	0
0.52	0.03	0.42	0	0.42	0	{'classifier__max_depth': 20, 'classifier__min_samples_leaf': 10, 'classifier__min_samples_split': 2, 'classifier__n_estimators': 100}	1	robust	ltsa_lle	random_forest	0
0.89	0.04	0.42	0	0.42	0	{'classifier__max_depth': 20, 'classifier__min_samples_leaf': 10, 'classifier__min_samples_split': 2, 'classifier__n_estimators': 200}	1	robust	ltsa_lle	random_forest	0
0.37	0.02	0.42	0	0.42	0	{'classifier__max_depth': 20, 'classifier__min_samples_leaf': 10, 'classifier__min_samples_split': 10, 'classifier__n_estimators': 50}	1	robust	ltsa_lle	random_forest	0
0.53	0.03	0.42	0	0.42	0	{'classifier__max_depth': 20, 'classifier__min_samples_leaf': 10, 'classifier__min_samples_split': 10, 'classifier__n_estimators': 100}	1	robust	ltsa_lle	random_forest	0
0.85	0.05	0.42	0	0.42	0	{'classifier__max_depth': 20, 'classifier__min_samples_leaf': 10, 'classifier__min_samples_split': 10, 'classifier__n_estimators': 200}	1	robust	ltsa_lle	random_forest	0
0.35	0.03	0.42	0	0.42	0	{'classifier__max_depth': 20, 'classifier__min_samples_leaf': 10, 'classifier__min_samples_split': 20, 'classifier__n_estimators': 50}	1	robust	ltsa_lle	random_forest	0
0.53	0.03	0.42	0	0.42	0	{'classifier__max_depth': 20, 'classifier__min_samples_leaf': 10, 'classifier__min_samples_split': 20, 'classifier__n_estimators': 100}	1	robust	ltsa_lle	random_forest	0
0.85	0.04	0.42	0	0.42	0	{'classifier__max_depth': 20, 'classifier__min_samples_leaf': 10, 'classifier__min_samples_split': 20, 'classifier__n_estimators': 200}	1	robust	ltsa_lle	random_forest	0
0.16	0.02	0.42	0	0.42	0	{'classifier__max_depth': 5, 'classifier__min_samples_leaf': 1, 'classifier__min_samples_split': 2}	1	robust	ltsa_lle	decision_tree	0
0.19	0.02	0.42	0	0.42	0	{'classifier__max_depth': 5, 'classifier__min_samples_leaf': 1, 'classifier__min_samples_split': 10}	1	robust	ltsa_lle	decision_tree	0
0.26	0.02	0.42	0	0.42	0	{'classifier__max_depth': 5, 'classifier__min_samples_leaf': 1, 'classifier__min_samples_split': 20}	1	robust	ltsa_lle	decision_tree	0
0.23	0.02	0.42	0	0.42	0	{'classifier__max_depth': 5, 'classifier__min_samples_leaf': 5, 'classifier__min_samples_split': 2}	1	robust	ltsa_lle	decision_tree	0
0.23	0.03	0.42	0	0.42	0	{'classifier__max_depth': 5, 'classifier__min_samples_leaf': 5, 'classifier__min_samples_split': 10}	1	robust	ltsa_lle	decision_tree	0
0.21	0.03	0.42	0	0.42	0	{'classifier__max_depth': 5, 'classifier__min_samples_leaf': 5, 'classifier__min_samples_split': 20}	1	robust	ltsa_lle	decision_tree	0
0.21	0.03	0.42	0	0.42	0	{'classifier__max_depth': 5, 'classifier__min_samples_leaf': 10, 'classifier__min_samples_split': 2}	1	robust	ltsa_lle	decision_tree	0
0.23	0.02	0.42	0	0.42	0	{'classifier__max_depth': 5, 'classifier__min_samples_leaf': 10, 'classifier__min_samples_split': 10}	1	robust	ltsa_lle	decision_tree	0
0.23	0.03	0.42	0	0.42	0	{'classifier__max_depth': 5, 'classifier__min_samples_leaf': 10, 'classifier__min_samples_split': 20}	1	robust	ltsa_lle	decision_tree	0
0.24	0.03	0.42	0	0.42	0	{'classifier__max_depth': 10, 'classifier__min_samples_leaf': 1, 'classifier__min_samples_split': 2}	1	robust	ltsa_lle	decision_tree	0
0.24	0.03	0.42	0	0.42	0	{'classifier__max_depth': 10, 'classifier__min_samples_leaf': 1, 'classifier__min_samples_split': 10}	1	robust	ltsa_lle	decision_tree	0
0.22	0.04	0.42	0	0.42	0	{'classifier__max_depth': 10, 'classifier__min_samples_leaf': 1, 'classifier__min_samples_split': 20}	1	robust	ltsa_lle	decision_tree	0
0.22	0.03	0.42	0	0.42	0	{'classifier__max_depth': 10, 'classifier__min_samples_leaf': 5, 'classifier__min_samples_split': 2}	1	robust	ltsa_lle	decision_tree	0
0.25	0.02	0.42	0	0.42	0	{'classifier__max_depth': 10, 'classifier__min_samples_leaf': 5, 'classifier__min_samples_split': 10}	1	robust	ltsa_lle	decision_tree	0
0.23	0.02	0.42	0	0.42	0	{'classifier__max_depth': 10, 'classifier__min_samples_leaf': 5, 'classifier__min_samples_split': 20}	1	robust	ltsa_lle	decision_tree	0
0.23	0.02	0.42	0	0.42	0	{'classifier__max_depth': 10, 'classifier__min_samples_leaf': 10, 'classifier__min_samples_split': 2}	1	robust	ltsa_lle	decision_tree	0
0.21	0.02	0.42	0	0.42	0	{'classifier__max_depth': 10, 'classifier__min_samples_leaf': 10, 'classifier__min_samples_split': 10}	1	robust	ltsa_lle	decision_tree	0
0.21	0.03	0.42	0	0.42	0	{'classifier__max_depth': 10, 'classifier__min_samples_leaf': 10, 'classifier__min_samples_split': 20}	1	robust	ltsa_lle	decision_tree	0
0.24	0.02	0.42	0	0.42	0	{'classifier__max_depth': 20, 'classifier__min_samples_leaf': 1, 'classifier__min_samples_split': 2}	1	robust	ltsa_lle	decision_tree	0
0.22	0.01	0.42	0	0.42	0	{'classifier__max_depth': 20, 'classifier__min_samples_leaf': 1, 'classifier__min_samples_split': 10}	1	robust	ltsa_lle	decision_tree	0
0.23	0.02	0.42	0	0.42	0	{'classifier__max_depth': 20, 'classifier__min_samples_leaf': 1, 'classifier__min_samples_split': 20}	1	robust	ltsa_lle	decision_tree	0
0.21	0.03	0.42	0	0.42	0	{'classifier__max_depth': 20, 'classifier__min_samples_leaf': 5, 'classifier__min_samples_split': 2}	1	robust	ltsa_lle	decision_tree	0
0.25	0.03	0.42	0	0.42	0	{'classifier__max_depth': 20, 'classifier__min_samples_leaf': 5, 'classifier__min_samples_split': 10}	1	robust	ltsa_lle	decision_tree	0
0.27	0.02	0.42	0	0.42	0	{'classifier__max_depth': 20, 'classifier__min_samples_leaf': 5, 'classifier__min_samples_split': 20}	1	robust	ltsa_lle	decision_tree	0
0.24	0.02	0.42	0	0.42	0	{'classifier__max_depth': 20, 'classifier__min_samples_leaf': 10, 'classifier__min_samples_split': 2}	1	robust	ltsa_lle	decision_tree	0
0.24	0.02	0.42	0	0.42	0	{'classifier__max_depth': 20, 'classifier__min_samples_leaf': 10, 'classifier__min_samples_split': 10}	1	robust	ltsa_lle	decision_tree	0
0.2	0.02	0.42	0	0.42	0	{'classifier__max_depth': 20, 'classifier__min_samples_leaf': 10, 'classifier__min_samples_split': 20}	1	robust	ltsa_lle	decision_tree	0
0.02	0.01	0.42	0	0.42	0	{'classifier__C': 0.1, 'classifier__gamma': 'scale'}	1	maxabs	random_projection	svm_sigmoid	0
0.02	0.01	0.42	0	0.42	0	{'classifier__C': 0.1, 'classifier__gamma': 'auto'}	1	maxabs	random_projection	svm_sigmoid	0
0.02	0.01	0.42	0	0.42	0	{'classifier__C': 0.1, 'classifier__gamma': 'scale'}	2	maxabs	truncatedsvd	svm_sigmoid	0
0.02	0	0.42	0	0.42	0	{'classifier__C': 0.1, 'classifier__gamma': 'auto'}	2	maxabs	truncatedsvd	svm_sigmoid	0
0.02	0.01	0.42	0	0.42	0	{'classifier__C': 1, 'classifier__gamma': 'scale'}	2	maxabs	truncatedsvd	svm_sigmoid	0
0.03	0.01	0.42	0	0.42	0	{'classifier__C': 1, 'classifier__gamma': 'auto'}	2	maxabs	truncatedsvd	svm_sigmoid	0
0.03	0.01	0.42	0.02	0.42	0.01	{'classifier__C': 10, 'classifier__gamma': 'scale'}	1	maxabs	truncatedsvd	svm_sigmoid	0
0.02	0.02	0.42	0	0.42	0	{'classifier__C': 10, 'classifier__gamma': 'auto'}	2	maxabs	truncatedsvd	svm_sigmoid	0
1.84	0.01	0.42	0	0.42	0	{'classifier__max_depth': None, 'classifier__min_samples_leaf': 1, 'classifier__min_samples_split': 2, 'classifier__n_estimators': 50}	1	maxabs	ltsa_lle	random_forest	0
1.64	0.06	0.42	0	0.42	0	{'classifier__max_depth': None, 'classifier__min_samples_leaf': 1, 'classifier__min_samples_split': 2, 'classifier__n_estimators': 100}	1	maxabs	ltsa_lle	random_forest	0
3.39	0.07	0.42	0	0.42	0	{'classifier__max_depth': None, 'classifier__min_samples_leaf': 1, 'classifier__min_samples_split': 2, 'classifier__n_estimators': 200}	1	maxabs	ltsa_lle	random_forest	0
2.61	0.02	0.42	0	0.42	0	{'classifier__max_depth': None, 'classifier__min_samples_leaf': 1, 'classifier__min_samples_split': 10, 'classifier__n_estimators': 50}	1	maxabs	ltsa_lle	random_forest	0
12.64	0.05	0.42	0	0.42	0	{'classifier__max_depth': None, 'classifier__min_samples_leaf': 1, 'classifier__min_samples_split': 10, 'classifier__n_estimators': 100}	1	maxabs	ltsa_lle	random_forest	0
12.93	0.09	0.42	0	0.42	0	{'classifier__max_depth': None, 'classifier__min_samples_leaf': 1, 'classifier__min_samples_split': 10, 'classifier__n_estimators': 200}	1	maxabs	ltsa_lle	random_forest	0
2.17	0.04	0.42	0	0.42	0	{'classifier__max_depth': None, 'classifier__min_samples_leaf': 1, 'classifier__min_samples_split': 20, 'classifier__n_estimators': 50}	1	maxabs	ltsa_lle	random_forest	0
2.23	0.06	0.42	0	0.42	0	{'classifier__max_depth': None, 'classifier__min_samples_leaf': 1, 'classifier__min_samples_split': 20, 'classifier__n_estimators': 100}	1	maxabs	ltsa_lle	random_forest	0
1.67	0.08	0.42	0	0.42	0	{'classifier__max_depth': None, 'classifier__min_samples_leaf': 1, 'classifier__min_samples_split': 20, 'classifier__n_estimators': 200}	1	maxabs	ltsa_lle	random_forest	0
0.91	0.05	0.42	0	0.42	0	{'classifier__max_depth': None, 'classifier__min_samples_leaf': 5, 'classifier__min_samples_split': 2, 'classifier__n_estimators': 50}	1	maxabs	ltsa_lle	random_forest	0
2.34	0.06	0.42	0	0.42	0	{'classifier__max_depth': None, 'classifier__min_samples_leaf': 5, 'classifier__min_samples_split': 2, 'classifier__n_estimators': 100}	1	maxabs	ltsa_lle	random_forest	0
26.59	0.08	0.42	0	0.42	0	{'classifier__max_depth': None, 'classifier__min_samples_leaf': 5, 'classifier__min_samples_split': 2, 'classifier__n_estimators': 200}	1	maxabs	ltsa_lle	random_forest	0
0.8	0.05	0.42	0	0.42	0	{'classifier__max_depth': None, 'classifier__min_samples_leaf': 5, 'classifier__min_samples_split': 10, 'classifier__n_estimators': 50}	1	maxabs	ltsa_lle	random_forest	0
2.08	0.05	0.42	0	0.42	0	{'classifier__max_depth': None, 'classifier__min_samples_leaf': 5, 'classifier__min_samples_split': 10, 'classifier__n_estimators': 100}	1	maxabs	ltsa_lle	random_forest	0
3.24	0.06	0.42	0	0.42	0	{'classifier__max_depth': None, 'classifier__min_samples_leaf': 5, 'classifier__min_samples_split': 10, 'classifier__n_estimators': 200}	1	maxabs	ltsa_lle	random_forest	0
1	0.04	0.42	0	0.42	0	{'classifier__max_depth': None, 'classifier__min_samples_leaf': 5, 'classifier__min_samples_split': 20, 'classifier__n_estimators': 50}	1	maxabs	ltsa_lle	random_forest	0
1.59	0.06	0.42	0	0.42	0	{'classifier__max_depth': None, 'classifier__min_samples_leaf': 5, 'classifier__min_samples_split': 20, 'classifier__n_estimators': 100}	1	maxabs	ltsa_lle	random_forest	0
2.16	0.08	0.42	0	0.42	0	{'classifier__max_depth': None, 'classifier__min_samples_leaf': 5, 'classifier__min_samples_split': 20, 'classifier__n_estimators': 200}	1	maxabs	ltsa_lle	random_forest	0
2.79	0.02	0.42	0	0.42	0	{'classifier__max_depth': None, 'classifier__min_samples_leaf': 10, 'classifier__min_samples_split': 2, 'classifier__n_estimators': 50}	1	maxabs	ltsa_lle	random_forest	0
26.92	0.07	0.42	0	0.42	0	{'classifier__max_depth': None, 'classifier__min_samples_leaf': 10, 'classifier__min_samples_split': 2, 'classifier__n_estimators': 100}	1	maxabs	ltsa_lle	random_forest	0
7.2	0.09	0.42	0	0.42	0	{'classifier__max_depth': None, 'classifier__min_samples_leaf': 10, 'classifier__min_samples_split': 2, 'classifier__n_estimators': 200}	1	maxabs	ltsa_lle	random_forest	0
2.08	0.03	0.42	0	0.42	0	{'classifier__max_depth': None, 'classifier__min_samples_leaf': 10, 'classifier__min_samples_split': 10, 'classifier__n_estimators': 50}	1	maxabs	ltsa_lle	random_forest	0
2.37	0.05	0.42	0	0.42	0	{'classifier__max_depth': None, 'classifier__min_samples_leaf': 10, 'classifier__min_samples_split': 10, 'classifier__n_estimators': 100}	1	maxabs	ltsa_lle	random_forest	0
2.65	0.07	0.42	0	0.42	0	{'classifier__max_depth': None, 'classifier__min_samples_leaf': 10, 'classifier__min_samples_split': 10, 'classifier__n_estimators': 200}	1	maxabs	ltsa_lle	random_forest	0
2.42	0.02	0.42	0	0.42	0	{'classifier__max_depth': None, 'classifier__min_samples_leaf': 10, 'classifier__min_samples_split': 20, 'classifier__n_estimators': 50}	1	maxabs	ltsa_lle	random_forest	0
3.6	0.05	0.42	0	0.42	0	{'classifier__max_depth': None, 'classifier__min_samples_leaf': 10, 'classifier__min_samples_split': 20, 'classifier__n_estimators': 100}	1	maxabs	ltsa_lle	random_forest	0
7.38	0.07	0.42	0	0.42	0	{'classifier__max_depth': None, 'classifier__min_samples_leaf': 10, 'classifier__min_samples_split': 20, 'classifier__n_estimators': 200}	1	maxabs	ltsa_lle	random_forest	0
1.27	0.03	0.42	0	0.42	0	{'classifier__max_depth': 10, 'classifier__min_samples_leaf': 1, 'classifier__min_samples_split': 2, 'classifier__n_estimators': 50}	1	maxabs	ltsa_lle	random_forest	0
2.46	0.05	0.42	0	0.42	0	{'classifier__max_depth': 10, 'classifier__min_samples_leaf': 1, 'classifier__min_samples_split': 2, 'classifier__n_estimators': 100}	1	maxabs	ltsa_lle	random_forest	0
1.76	0.09	0.42	0	0.42	0	{'classifier__max_depth': 10, 'classifier__min_samples_leaf': 1, 'classifier__min_samples_split': 2, 'classifier__n_estimators': 200}	1	maxabs	ltsa_lle	random_forest	0
1.26	0.03	0.42	0	0.42	0	{'classifier__max_depth': 10, 'classifier__min_samples_leaf': 1, 'classifier__min_samples_split': 10, 'classifier__n_estimators': 50}	1	maxabs	ltsa_lle	random_forest	0
12.97	0.05	0.42	0	0.42	0	{'classifier__max_depth': 10, 'classifier__min_samples_leaf': 1, 'classifier__min_samples_split': 10, 'classifier__n_estimators': 100}	1	maxabs	ltsa_lle	random_forest	0
33.13	0.1	0.42	0	0.42	0	{'classifier__max_depth': 10, 'classifier__min_samples_leaf': 1, 'classifier__min_samples_split': 10, 'classifier__n_estimators': 200}	1	maxabs	ltsa_lle	random_forest	0
3.89	0.03	0.42	0	0.42	0	{'classifier__max_depth': 10, 'classifier__min_samples_leaf': 1, 'classifier__min_samples_split': 20, 'classifier__n_estimators': 50}	1	maxabs	ltsa_lle	random_forest	0
3.6	0.05	0.42	0	0.42	0	{'classifier__max_depth': 10, 'classifier__min_samples_leaf': 1, 'classifier__min_samples_split': 20, 'classifier__n_estimators': 100}	1	maxabs	ltsa_lle	random_forest	0
6.66	0.08	0.42	0	0.42	0	{'classifier__max_depth': 10, 'classifier__min_samples_leaf': 1, 'classifier__min_samples_split': 20, 'classifier__n_estimators': 200}	1	maxabs	ltsa_lle	random_forest	0
3.49	0.02	0.42	0	0.42	0	{'classifier__max_depth': 10, 'classifier__min_samples_leaf': 5, 'classifier__min_samples_split': 2, 'classifier__n_estimators': 50}	1	maxabs	ltsa_lle	random_forest	0
11.65	0.06	0.42	0	0.42	0	{'classifier__max_depth': 10, 'classifier__min_samples_leaf': 5, 'classifier__min_samples_split': 2, 'classifier__n_estimators': 100}	1	maxabs	ltsa_lle	random_forest	0
26.48	0.12	0.42	0	0.42	0	{'classifier__max_depth': 10, 'classifier__min_samples_leaf': 5, 'classifier__min_samples_split': 2, 'classifier__n_estimators': 200}	1	maxabs	ltsa_lle	random_forest	0
1.3	0.04	0.42	0	0.42	0	{'classifier__max_depth': 10, 'classifier__min_samples_leaf': 5, 'classifier__min_samples_split': 10, 'classifier__n_estimators': 50}	1	maxabs	ltsa_lle	random_forest	0
2.2	0.05	0.42	0	0.42	0	{'classifier__max_depth': 10, 'classifier__min_samples_leaf': 5, 'classifier__min_samples_split': 10, 'classifier__n_estimators': 100}	1	maxabs	ltsa_lle	random_forest	0
9.3	0.07	0.42	0	0.42	0	{'classifier__max_depth': 10, 'classifier__min_samples_leaf': 5, 'classifier__min_samples_split': 10, 'classifier__n_estimators': 200}	1	maxabs	ltsa_lle	random_forest	0
6.29	0.02	0.42	0	0.42	0	{'classifier__max_depth': 10, 'classifier__min_samples_leaf': 5, 'classifier__min_samples_split': 20, 'classifier__n_estimators': 50}	1	maxabs	ltsa_lle	random_forest	0
1.94	0.04	0.42	0	0.42	0	{'classifier__max_depth': 10, 'classifier__min_samples_leaf': 5, 'classifier__min_samples_split': 20, 'classifier__n_estimators': 100}	1	maxabs	ltsa_lle	random_forest	0
4.45	0.09	0.42	0	0.42	0	{'classifier__max_depth': 10, 'classifier__min_samples_leaf': 5, 'classifier__min_samples_split': 20, 'classifier__n_estimators': 200}	1	maxabs	ltsa_lle	random_forest	0
3.51	0.03	0.42	0	0.42	0	{'classifier__max_depth': 10, 'classifier__min_samples_leaf': 10, 'classifier__min_samples_split': 2, 'classifier__n_estimators': 50}	1	maxabs	ltsa_lle	random_forest	0
1.89	0.06	0.42	0	0.42	0	{'classifier__max_depth': 10, 'classifier__min_samples_leaf': 10, 'classifier__min_samples_split': 2, 'classifier__n_estimators': 100}	1	maxabs	ltsa_lle	random_forest	0
4.17	0.07	0.42	0	0.42	0	{'classifier__max_depth': 10, 'classifier__min_samples_leaf': 10, 'classifier__min_samples_split': 2, 'classifier__n_estimators': 200}	1	maxabs	ltsa_lle	random_forest	0
2.47	0.04	0.42	0	0.42	0	{'classifier__max_depth': 10, 'classifier__min_samples_leaf': 10, 'classifier__min_samples_split': 10, 'classifier__n_estimators': 50}	1	maxabs	ltsa_lle	random_forest	0
6.96	0.05	0.42	0	0.42	0	{'classifier__max_depth': 10, 'classifier__min_samples_leaf': 10, 'classifier__min_samples_split': 10, 'classifier__n_estimators': 100}	1	maxabs	ltsa_lle	random_forest	0
6.3	0.08	0.42	0	0.42	0	{'classifier__max_depth': 10, 'classifier__min_samples_leaf': 10, 'classifier__min_samples_split': 10, 'classifier__n_estimators': 200}	1	maxabs	ltsa_lle	random_forest	0
3.88	0.02	0.42	0	0.42	0	{'classifier__max_depth': 10, 'classifier__min_samples_leaf': 10, 'classifier__min_samples_split': 20, 'classifier__n_estimators': 50}	1	maxabs	ltsa_lle	random_forest	0
15.32	0.05	0.42	0	0.42	0	{'classifier__max_depth': 10, 'classifier__min_samples_leaf': 10, 'classifier__min_samples_split': 20, 'classifier__n_estimators': 100}	1	maxabs	ltsa_lle	random_forest	0
2.91	0.09	0.42	0	0.42	0	{'classifier__max_depth': 10, 'classifier__min_samples_leaf': 10, 'classifier__min_samples_split': 20, 'classifier__n_estimators': 200}	1	maxabs	ltsa_lle	random_forest	0
1.58	0.03	0.42	0	0.42	0	{'classifier__max_depth': 20, 'classifier__min_samples_leaf': 1, 'classifier__min_samples_split': 2, 'classifier__n_estimators': 50}	1	maxabs	ltsa_lle	random_forest	0
2.85	0.05	0.42	0	0.42	0	{'classifier__max_depth': 20, 'classifier__min_samples_leaf': 1, 'classifier__min_samples_split': 2, 'classifier__n_estimators': 100}	1	maxabs	ltsa_lle	random_forest	0
11.3	0.06	0.42	0	0.42	0	{'classifier__max_depth': 20, 'classifier__min_samples_leaf': 1, 'classifier__min_samples_split': 2, 'classifier__n_estimators': 200}	1	maxabs	ltsa_lle	random_forest	0
3.81	0.03	0.42	0	0.42	0	{'classifier__max_depth': 20, 'classifier__min_samples_leaf': 1, 'classifier__min_samples_split': 10, 'classifier__n_estimators': 50}	1	maxabs	ltsa_lle	random_forest	0
2.12	0.03	0.42	0	0.42	0	{'classifier__max_depth': 20, 'classifier__min_samples_leaf': 1, 'classifier__min_samples_split': 10, 'classifier__n_estimators': 100}	1	maxabs	ltsa_lle	random_forest	0
2.79	0.05	0.42	0	0.42	0	{'classifier__max_depth': 20, 'classifier__min_samples_leaf': 1, 'classifier__min_samples_split': 10, 'classifier__n_estimators': 200}	1	maxabs	ltsa_lle	random_forest	0
2.63	0.04	0.42	0	0.42	0	{'classifier__max_depth': 20, 'classifier__min_samples_leaf': 1, 'classifier__min_samples_split': 20, 'classifier__n_estimators': 50}	1	maxabs	ltsa_lle	random_forest	0
3.28	0.05	0.42	0	0.42	0	{'classifier__max_depth': 20, 'classifier__min_samples_leaf': 1, 'classifier__min_samples_split': 20, 'classifier__n_estimators': 100}	1	maxabs	ltsa_lle	random_forest	0
2.6	0.04	0.42	0	0.42	0	{'classifier__max_depth': 20, 'classifier__min_samples_leaf': 1, 'classifier__min_samples_split': 20, 'classifier__n_estimators': 200}	1	maxabs	ltsa_lle	random_forest	0
4.49	0.03	0.42	0	0.42	0	{'classifier__max_depth': 20, 'classifier__min_samples_leaf': 5, 'classifier__min_samples_split': 2, 'classifier__n_estimators': 50}	1	maxabs	ltsa_lle	random_forest	0
3.28	0.03	0.42	0	0.42	0	{'classifier__max_depth': 20, 'classifier__min_samples_leaf': 5, 'classifier__min_samples_split': 2, 'classifier__n_estimators': 100}	1	maxabs	ltsa_lle	random_forest	0
7.46	0.06	0.42	0	0.42	0	{'classifier__max_depth': 20, 'classifier__min_samples_leaf': 5, 'classifier__min_samples_split': 2, 'classifier__n_estimators': 200}	1	maxabs	ltsa_lle	random_forest	0
11.22	0.03	0.42	0	0.42	0	{'classifier__max_depth': 20, 'classifier__min_samples_leaf': 5, 'classifier__min_samples_split': 10, 'classifier__n_estimators': 50}	1	maxabs	ltsa_lle	random_forest	0
4	0.03	0.42	0	0.42	0	{'classifier__max_depth': 20, 'classifier__min_samples_leaf': 5, 'classifier__min_samples_split': 10, 'classifier__n_estimators': 100}	1	maxabs	ltsa_lle	random_forest	0
4.75	0.05	0.42	0	0.42	0	{'classifier__max_depth': 20, 'classifier__min_samples_leaf': 5, 'classifier__min_samples_split': 10, 'classifier__n_estimators': 200}	1	maxabs	ltsa_lle	random_forest	0
2.85	0.03	0.42	0	0.42	0	{'classifier__max_depth': 20, 'classifier__min_samples_leaf': 5, 'classifier__min_samples_split': 20, 'classifier__n_estimators': 50}	1	maxabs	ltsa_lle	random_forest	0
18.77	0.04	0.42	0	0.42	0	{'classifier__max_depth': 20, 'classifier__min_samples_leaf': 5, 'classifier__min_samples_split': 20, 'classifier__n_estimators': 100}	1	maxabs	ltsa_lle	random_forest	0
30.47	0.05	0.42	0	0.42	0	{'classifier__max_depth': 20, 'classifier__min_samples_leaf': 5, 'classifier__min_samples_split': 20, 'classifier__n_estimators': 200}	1	maxabs	ltsa_lle	random_forest	0
3.51	0.02	0.42	0	0.42	0	{'classifier__max_depth': 20, 'classifier__min_samples_leaf': 10, 'classifier__min_samples_split': 2, 'classifier__n_estimators': 50}	1	maxabs	ltsa_lle	random_forest	0
7.01	0.06	0.42	0	0.42	0	{'classifier__max_depth': 20, 'classifier__min_samples_leaf': 10, 'classifier__min_samples_split': 2, 'classifier__n_estimators': 100}	1	maxabs	ltsa_lle	random_forest	0
2.41	0.09	0.42	0	0.42	0	{'classifier__max_depth': 20, 'classifier__min_samples_leaf': 10, 'classifier__min_samples_split': 2, 'classifier__n_estimators': 200}	1	maxabs	ltsa_lle	random_forest	0
1.81	0.03	0.42	0	0.42	0	{'classifier__max_depth': 20, 'classifier__min_samples_leaf': 10, 'classifier__min_samples_split': 10, 'classifier__n_estimators': 50}	1	maxabs	ltsa_lle	random_forest	0
3.27	0.05	0.42	0	0.42	0	{'classifier__max_depth': 20, 'classifier__min_samples_leaf': 10, 'classifier__min_samples_split': 10, 'classifier__n_estimators': 100}	1	maxabs	ltsa_lle	random_forest	0
4.02	0.07	0.42	0	0.42	0	{'classifier__max_depth': 20, 'classifier__min_samples_leaf': 10, 'classifier__min_samples_split': 10, 'classifier__n_estimators': 200}	1	maxabs	ltsa_lle	random_forest	0
4.23	0.04	0.42	0	0.42	0	{'classifier__max_depth': 20, 'classifier__min_samples_leaf': 10, 'classifier__min_samples_split': 20, 'classifier__n_estimators': 50}	1	maxabs	ltsa_lle	random_forest	0
6.35	0.04	0.42	0	0.42	0	{'classifier__max_depth': 20, 'classifier__min_samples_leaf': 10, 'classifier__min_samples_split': 20, 'classifier__n_estimators': 100}	1	maxabs	ltsa_lle	random_forest	0
2.06	0.04	0.42	0	0.42	0	{'classifier__max_depth': 20, 'classifier__min_samples_leaf': 10, 'classifier__min_samples_split': 20, 'classifier__n_estimators': 200}	1	maxabs	ltsa_lle	random_forest	0
6.89	0.01	0.42	0	0.42	0	{'classifier__max_depth': 5, 'classifier__min_samples_leaf': 1, 'classifier__min_samples_split': 2}	1	maxabs	ltsa_lle	decision_tree	0
40.46	0.02	0.42	0	0.42	0	{'classifier__max_depth': 5, 'classifier__min_samples_leaf': 1, 'classifier__min_samples_split': 10}	1	maxabs	ltsa_lle	decision_tree	0
4.74	0.01	0.42	0	0.42	0	{'classifier__max_depth': 5, 'classifier__min_samples_leaf': 1, 'classifier__min_samples_split': 20}	1	maxabs	ltsa_lle	decision_tree	0
3.26	0.01	0.42	0	0.42	0	{'classifier__max_depth': 5, 'classifier__min_samples_leaf': 5, 'classifier__min_samples_split': 2}	1	maxabs	ltsa_lle	decision_tree	0
3.69	0.01	0.42	0	0.42	0	{'classifier__max_depth': 5, 'classifier__min_samples_leaf': 5, 'classifier__min_samples_split': 10}	1	maxabs	ltsa_lle	decision_tree	0
5.35	0.01	0.42	0	0.42	0	{'classifier__max_depth': 5, 'classifier__min_samples_leaf': 5, 'classifier__min_samples_split': 20}	1	maxabs	ltsa_lle	decision_tree	0
1.79	0.01	0.42	0	0.42	0	{'classifier__max_depth': 5, 'classifier__min_samples_leaf': 10, 'classifier__min_samples_split': 2}	1	maxabs	ltsa_lle	decision_tree	0
1.65	0.01	0.42	0	0.42	0	{'classifier__max_depth': 5, 'classifier__min_samples_leaf': 10, 'classifier__min_samples_split': 10}	1	maxabs	ltsa_lle	decision_tree	0
1.45	0.01	0.42	0	0.42	0	{'classifier__max_depth': 5, 'classifier__min_samples_leaf': 10, 'classifier__min_samples_split': 20}	1	maxabs	ltsa_lle	decision_tree	0
1.65	0.01	0.42	0	0.42	0	{'classifier__max_depth': 10, 'classifier__min_samples_leaf': 1, 'classifier__min_samples_split': 2}	1	maxabs	ltsa_lle	decision_tree	0
6.24	0.01	0.42	0	0.42	0	{'classifier__max_depth': 10, 'classifier__min_samples_leaf': 1, 'classifier__min_samples_split': 10}	1	maxabs	ltsa_lle	decision_tree	0
4.11	0.01	0.42	0	0.42	0	{'classifier__max_depth': 10, 'classifier__min_samples_leaf': 1, 'classifier__min_samples_split': 20}	1	maxabs	ltsa_lle	decision_tree	0
1.9	0.01	0.42	0	0.42	0	{'classifier__max_depth': 10, 'classifier__min_samples_leaf': 5, 'classifier__min_samples_split': 2}	1	maxabs	ltsa_lle	decision_tree	0
2.38	0.01	0.42	0	0.42	0	{'classifier__max_depth': 10, 'classifier__min_samples_leaf': 5, 'classifier__min_samples_split': 10}	1	maxabs	ltsa_lle	decision_tree	0
2.13	0.01	0.42	0	0.42	0	{'classifier__max_depth': 10, 'classifier__min_samples_leaf': 5, 'classifier__min_samples_split': 20}	1	maxabs	ltsa_lle	decision_tree	0
18.78	0.01	0.42	0	0.42	0	{'classifier__max_depth': 10, 'classifier__min_samples_leaf': 10, 'classifier__min_samples_split': 2}	1	maxabs	ltsa_lle	decision_tree	0
4.29	0.01	0.42	0	0.42	0	{'classifier__max_depth': 10, 'classifier__min_samples_leaf': 10, 'classifier__min_samples_split': 10}	1	maxabs	ltsa_lle	decision_tree	0
1.95	0.01	0.42	0	0.42	0	{'classifier__max_depth': 10, 'classifier__min_samples_leaf': 10, 'classifier__min_samples_split': 20}	1	maxabs	ltsa_lle	decision_tree	0
5.63	0.01	0.42	0	0.42	0	{'classifier__max_depth': 20, 'classifier__min_samples_leaf': 1, 'classifier__min_samples_split': 2}	1	maxabs	ltsa_lle	decision_tree	0
2.84	0.01	0.42	0	0.42	0	{'classifier__max_depth': 20, 'classifier__min_samples_leaf': 1, 'classifier__min_samples_split': 10}	1	maxabs	ltsa_lle	decision_tree	0
1.99	0.02	0.42	0	0.42	0	{'classifier__max_depth': 20, 'classifier__min_samples_leaf': 1, 'classifier__min_samples_split': 20}	1	maxabs	ltsa_lle	decision_tree	0
1.72	0.01	0.42	0	0.42	0	{'classifier__max_depth': 20, 'classifier__min_samples_leaf': 5, 'classifier__min_samples_split': 2}	1	maxabs	ltsa_lle	decision_tree	0
2.01	0.02	0.42	0	0.42	0	{'classifier__max_depth': 20, 'classifier__min_samples_leaf': 5, 'classifier__min_samples_split': 10}	1	maxabs	ltsa_lle	decision_tree	0
12.46	0.01	0.42	0	0.42	0	{'classifier__max_depth': 20, 'classifier__min_samples_leaf': 5, 'classifier__min_samples_split': 20}	1	maxabs	ltsa_lle	decision_tree	0
3.12	0.01	0.42	0	0.42	0	{'classifier__max_depth': 20, 'classifier__min_samples_leaf': 10, 'classifier__min_samples_split': 2}	1	maxabs	ltsa_lle	decision_tree	0
2.71	0.01	0.42	0	0.42	0	{'classifier__max_depth': 20, 'classifier__min_samples_leaf': 10, 'classifier__min_samples_split': 10}	1	maxabs	ltsa_lle	decision_tree	0
1.62	0.01	0.42	0	0.42	0	{'classifier__max_depth': 20, 'classifier__min_samples_leaf': 10, 'classifier__min_samples_split': 20}	1	maxabs	ltsa_lle	decision_tree	0
0.04	0	0.42	0	0.42	0	{'classifier__C': 0.1, 'classifier__gamma': 'scale'}	2	normalizer	pca	svm_sigmoid	0
0.06	0.01	0.42	0	0.42	0	{'classifier__C': 0.1, 'classifier__gamma': 'auto'}	2	normalizer	pca	svm_sigmoid	0
0.05	0.03	0.42	0	0.42	0	{'classifier__C': 1, 'classifier__gamma': 'auto'}	2	normalizer	pca	svm_sigmoid	0
0.08	0	0.42	0.01	0.42	0	{'classifier__C': 10, 'classifier__gamma': 'auto'}	1	normalizer	pca	svm_sigmoid	0
0.04	0.01	0.42	0	0.42	0	{'classifier__C': 0.1, 'classifier__gamma': 'scale'}	1	normalizer	ica	svm_sigmoid	0
0.05	0.01	0.42	0	0.42	0	{'classifier__C': 0.1, 'classifier__gamma': 'auto'}	1	normalizer	ica	svm_sigmoid	0
0.03	0.01	0.42	0.02	0.42	0.01	{'classifier__C': 10, 'classifier__gamma': 'scale'}	2	normalizer	random_projection	svm_linear	0
0.02	0.02	0.42	0.02	0.42	0.01	{'classifier__C': 0.1, 'classifier__gamma': 'scale'}	1	normalizer	random_projection	svm_sigmoid	0
0.04	0.01	0.42	0.01	0.42	0.02	{'classifier__C': 10, 'classifier__gamma': 'auto'}	2	normalizer	random_projection	svm_sigmoid	0
0.08	0.01	0.42	0	0.42	0	{'classifier__C': 0.1, 'classifier__gamma': 'scale'}	1	normalizer	truncatedsvd	svm_linear	0
0.04	0.02	0.42	0	0.42	0	{'classifier__C': 0.1, 'classifier__gamma': 'auto'}	1	normalizer	truncatedsvd	svm_linear	0
0.04	0.03	0.42	0	0.42	0	{'classifier__C': 1, 'classifier__gamma': 'scale'}	1	normalizer	truncatedsvd	svm_linear	0
0.04	0.03	0.42	0	0.42	0	{'classifier__C': 1, 'classifier__gamma': 'auto'}	1	normalizer	truncatedsvd	svm_linear	0
0.06	0.02	0.42	0	0.42	0	{'classifier__C': 10, 'classifier__gamma': 'scale'}	1	normalizer	truncatedsvd	svm_linear	0
0.04	0.03	0.42	0	0.42	0	{'classifier__C': 10, 'classifier__gamma': 'auto'}	1	normalizer	truncatedsvd	svm_linear	0
0.02	0.01	0.42	0	0.42	0	{'classifier__C': 0.1, 'classifier__gamma': 'scale'}	1	normalizer	truncatedsvd	svm_rbf	0
0.03	0.01	0.42	0	0.42	0	{'classifier__C': 0.1, 'classifier__gamma': 'auto'}	1	normalizer	truncatedsvd	svm_rbf	0
0.04	0.02	0.42	0	0.42	0	{'classifier__C': 1, 'classifier__gamma': 'scale'}	1	normalizer	truncatedsvd	svm_rbf	0
0.06	0.01	0.42	0	0.42	0	{'classifier__C': 1, 'classifier__gamma': 'auto'}	1	normalizer	truncatedsvd	svm_rbf	0
0.07	0.03	0.42	0	0.42	0	{'classifier__C': 10, 'classifier__gamma': 'scale'}	1	normalizer	truncatedsvd	svm_rbf	0
0.05	0.01	0.42	0	0.42	0	{'classifier__C': 10, 'classifier__gamma': 'auto'}	1	normalizer	truncatedsvd	svm_rbf	0
0.02	0.01	0.42	0	0.42	0	{'classifier__C': 0.1, 'classifier__gamma': 'scale'}	1	normalizer	truncatedsvd	svm_sigmoid	0
0.03	0.01	0.42	0	0.42	0	{'classifier__C': 0.1, 'classifier__gamma': 'auto'}	1	normalizer	truncatedsvd	svm_sigmoid	0
0.03	0.02	0.42	0	0.42	0	{'classifier__C': 1, 'classifier__gamma': 'scale'}	1	normalizer	truncatedsvd	svm_sigmoid	0
0.05	0.01	0.42	0	0.42	0	{'classifier__C': 1, 'classifier__gamma': 'auto'}	1	normalizer	truncatedsvd	svm_sigmoid	0
0.04	0.02	0.42	0	0.42	0	{'classifier__C': 10, 'classifier__gamma': 'auto'}	1	normalizer	truncatedsvd	svm_sigmoid	0
0.11	0	0.42	0	0.42	0	{'classifier__C': 0.1, 'classifier__penalty': 'l1', 'classifier__solver': 'liblinear'}	1	normalizer	truncatedsvd	logistic_regression	0
0.03	0	0.42	0	0.42	0	{'classifier__C': 0.1, 'classifier__penalty': 'l2', 'classifier__solver': 'liblinear'}	1	normalizer	truncatedsvd	logistic_regression	0
0.11	0.02	0.42	0	0.42	0	{'classifier__C': 1, 'classifier__penalty': 'l1', 'classifier__solver': 'liblinear'}	1	normalizer	truncatedsvd	logistic_regression	0
0.03	0	0.42	0	0.42	0	{'classifier__C': 1, 'classifier__penalty': 'l2', 'classifier__solver': 'liblinear'}	1	normalizer	truncatedsvd	logistic_regression	0
0.26	0.01	0.42	0	0.42	0	{'classifier__C': 10, 'classifier__penalty': 'l1', 'classifier__solver': 'liblinear'}	1	normalizer	truncatedsvd	logistic_regression	0
0.04	0	0.42	0	0.42	0	{'classifier__C': 10, 'classifier__penalty': 'l2', 'classifier__solver': 'liblinear'}	1	normalizer	truncatedsvd	logistic_regression	0
1.9	0.02	0.42	0	0.42	0	{'classifier__alpha': 0.0001, 'classifier__hidden_layer_sizes': (50,)}	1	normalizer	truncatedsvd	mlp	0
3.54	0.01	0.42	0	0.42	0	{'classifier__alpha': 0.0001, 'classifier__hidden_layer_sizes': (100,)}	1	normalizer	truncatedsvd	mlp	0
1.53	0.01	0.42	0	0.42	0	{'classifier__alpha': 0.001, 'classifier__hidden_layer_sizes': (50,)}	1	normalizer	truncatedsvd	mlp	0
1.5	0.02	0.42	0	0.42	0	{'classifier__alpha': 0.01, 'classifier__hidden_layer_sizes': (50,)}	1	normalizer	truncatedsvd	mlp	0
3.22	0	0.42	0	0.42	0	{'classifier__alpha': 0.01, 'classifier__hidden_layer_sizes': (100,)}	1	normalizer	truncatedsvd	mlp	0
0.1	0.01	0.42	0	0.42	0	{'classifier__C': 0.1, 'classifier__gamma': 'scale'}	2	normalizer	isomap	svm_sigmoid	0
0.14	0.02	0.42	0	0.42	0	{'classifier__C': 0.1, 'classifier__gamma': 'auto'}	2	normalizer	isomap	svm_sigmoid	0
0.15	0.02	0.42	0	0.42	0	{'classifier__C': 1, 'classifier__gamma': 'auto'}	2	normalizer	isomap	svm_sigmoid	0
0.16	0.02	0.42	0.01	0.42	0.01	{'classifier__C': 10, 'classifier__gamma': 'auto'}	2	normalizer	lle	svm_sigmoid	0
0.19	0.03	0.42	0.02	0.42	0.01	{'classifier__C': 0.1, 'classifier__gamma': 'scale'}	1	normalizer	modified_lle	svm_sigmoid	0
0.21	0.02	0.42	0.02	0.42	0.01	{'classifier__C': 1, 'classifier__penalty': 'l1', 'classifier__solver': 'liblinear'}	1	normalizer	modified_lle	logistic_regression	0
0.31	0.03	0.42	0	0.42	0	{'classifier__max_depth': None, 'classifier__min_samples_leaf': 1, 'classifier__min_samples_split': 2, 'classifier__n_estimators': 50}	1	normalizer	ltsa_lle	random_forest	0
0.54	0.02	0.42	0	0.42	0	{'classifier__max_depth': None, 'classifier__min_samples_leaf': 1, 'classifier__min_samples_split': 2, 'classifier__n_estimators': 100}	1	normalizer	ltsa_lle	random_forest	0
0.86	0.04	0.42	0	0.42	0	{'classifier__max_depth': None, 'classifier__min_samples_leaf': 1, 'classifier__min_samples_split': 2, 'classifier__n_estimators': 200}	1	normalizer	ltsa_lle	random_forest	0
0.34	0.03	0.42	0	0.42	0	{'classifier__max_depth': None, 'classifier__min_samples_leaf': 1, 'classifier__min_samples_split': 10, 'classifier__n_estimators': 50}	1	normalizer	ltsa_lle	random_forest	0
0.48	0.03	0.42	0	0.42	0	{'classifier__max_depth': None, 'classifier__min_samples_leaf': 1, 'classifier__min_samples_split': 10, 'classifier__n_estimators': 100}	1	normalizer	ltsa_lle	random_forest	0
0.78	0.04	0.42	0	0.42	0	{'classifier__max_depth': None, 'classifier__min_samples_leaf': 1, 'classifier__min_samples_split': 10, 'classifier__n_estimators': 200}	1	normalizer	ltsa_lle	random_forest	0
0.32	0.03	0.42	0	0.42	0	{'classifier__max_depth': None, 'classifier__min_samples_leaf': 1, 'classifier__min_samples_split': 20, 'classifier__n_estimators': 50}	1	normalizer	ltsa_lle	random_forest	0
0.53	0.03	0.42	0	0.42	0	{'classifier__max_depth': None, 'classifier__min_samples_leaf': 1, 'classifier__min_samples_split': 20, 'classifier__n_estimators': 100}	1	normalizer	ltsa_lle	random_forest	0
0.81	0.04	0.42	0	0.42	0	{'classifier__max_depth': None, 'classifier__min_samples_leaf': 1, 'classifier__min_samples_split': 20, 'classifier__n_estimators': 200}	1	normalizer	ltsa_lle	random_forest	0
0.33	0.02	0.42	0	0.42	0	{'classifier__max_depth': None, 'classifier__min_samples_leaf': 5, 'classifier__min_samples_split': 2, 'classifier__n_estimators': 50}	1	normalizer	ltsa_lle	random_forest	0
0.48	0.03	0.42	0	0.42	0	{'classifier__max_depth': None, 'classifier__min_samples_leaf': 5, 'classifier__min_samples_split': 2, 'classifier__n_estimators': 100}	1	normalizer	ltsa_lle	random_forest	0
0.78	0.04	0.42	0	0.42	0	{'classifier__max_depth': None, 'classifier__min_samples_leaf': 5, 'classifier__min_samples_split': 2, 'classifier__n_estimators': 200}	1	normalizer	ltsa_lle	random_forest	0
0.31	0.03	0.42	0	0.42	0	{'classifier__max_depth': None, 'classifier__min_samples_leaf': 5, 'classifier__min_samples_split': 10, 'classifier__n_estimators': 50}	1	normalizer	ltsa_lle	random_forest	0
0.49	0.03	0.42	0	0.42	0	{'classifier__max_depth': None, 'classifier__min_samples_leaf': 5, 'classifier__min_samples_split': 10, 'classifier__n_estimators': 100}	1	normalizer	ltsa_lle	random_forest	0
0.79	0.03	0.42	0	0.42	0	{'classifier__max_depth': None, 'classifier__min_samples_leaf': 5, 'classifier__min_samples_split': 10, 'classifier__n_estimators': 200}	1	normalizer	ltsa_lle	random_forest	0
0.32	0.03	0.42	0	0.42	0	{'classifier__max_depth': None, 'classifier__min_samples_leaf': 5, 'classifier__min_samples_split': 20, 'classifier__n_estimators': 50}	1	normalizer	ltsa_lle	random_forest	0
0.48	0.04	0.42	0	0.42	0	{'classifier__max_depth': None, 'classifier__min_samples_leaf': 5, 'classifier__min_samples_split': 20, 'classifier__n_estimators': 100}	1	normalizer	ltsa_lle	random_forest	0
0.8	0.04	0.42	0	0.42	0	{'classifier__max_depth': None, 'classifier__min_samples_leaf': 5, 'classifier__min_samples_split': 20, 'classifier__n_estimators': 200}	1	normalizer	ltsa_lle	random_forest	0
0.33	0.03	0.42	0	0.42	0	{'classifier__max_depth': None, 'classifier__min_samples_leaf': 10, 'classifier__min_samples_split': 2, 'classifier__n_estimators': 50}	1	normalizer	ltsa_lle	random_forest	0
0.48	0.03	0.42	0	0.42	0	{'classifier__max_depth': None, 'classifier__min_samples_leaf': 10, 'classifier__min_samples_split': 2, 'classifier__n_estimators': 100}	1	normalizer	ltsa_lle	random_forest	0
0.8	0.03	0.42	0	0.42	0	{'classifier__max_depth': None, 'classifier__min_samples_leaf': 10, 'classifier__min_samples_split': 2, 'classifier__n_estimators': 200}	1	normalizer	ltsa_lle	random_forest	0
0.31	0.02	0.42	0	0.42	0	{'classifier__max_depth': None, 'classifier__min_samples_leaf': 10, 'classifier__min_samples_split': 10, 'classifier__n_estimators': 50}	1	normalizer	ltsa_lle	random_forest	0
0.48	0.03	0.42	0	0.42	0	{'classifier__max_depth': None, 'classifier__min_samples_leaf': 10, 'classifier__min_samples_split': 10, 'classifier__n_estimators': 100}	1	normalizer	ltsa_lle	random_forest	0
0.79	0.04	0.42	0	0.42	0	{'classifier__max_depth': None, 'classifier__min_samples_leaf': 10, 'classifier__min_samples_split': 10, 'classifier__n_estimators': 200}	1	normalizer	ltsa_lle	random_forest	0
0.32	0.02	0.42	0	0.42	0	{'classifier__max_depth': None, 'classifier__min_samples_leaf': 10, 'classifier__min_samples_split': 20, 'classifier__n_estimators': 50}	1	normalizer	ltsa_lle	random_forest	0
0.48	0.03	0.42	0	0.42	0	{'classifier__max_depth': None, 'classifier__min_samples_leaf': 10, 'classifier__min_samples_split': 20, 'classifier__n_estimators': 100}	1	normalizer	ltsa_lle	random_forest	0
0.79	0.04	0.42	0	0.42	0	{'classifier__max_depth': None, 'classifier__min_samples_leaf': 10, 'classifier__min_samples_split': 20, 'classifier__n_estimators': 200}	1	normalizer	ltsa_lle	random_forest	0
0.31	0.02	0.42	0	0.42	0	{'classifier__max_depth': 10, 'classifier__min_samples_leaf': 1, 'classifier__min_samples_split': 2, 'classifier__n_estimators': 50}	1	normalizer	ltsa_lle	random_forest	0
0.48	0.03	0.42	0	0.42	0	{'classifier__max_depth': 10, 'classifier__min_samples_leaf': 1, 'classifier__min_samples_split': 2, 'classifier__n_estimators': 100}	1	normalizer	ltsa_lle	random_forest	0
0.8	0.05	0.42	0	0.42	0	{'classifier__max_depth': 10, 'classifier__min_samples_leaf': 1, 'classifier__min_samples_split': 2, 'classifier__n_estimators': 200}	1	normalizer	ltsa_lle	random_forest	0
0.32	0.02	0.42	0	0.42	0	{'classifier__max_depth': 10, 'classifier__min_samples_leaf': 1, 'classifier__min_samples_split': 10, 'classifier__n_estimators': 50}	1	normalizer	ltsa_lle	random_forest	0
0.5	0.02	0.42	0	0.42	0	{'classifier__max_depth': 10, 'classifier__min_samples_leaf': 1, 'classifier__min_samples_split': 10, 'classifier__n_estimators': 100}	1	normalizer	ltsa_lle	random_forest	0
0.8	0.05	0.42	0	0.42	0	{'classifier__max_depth': 10, 'classifier__min_samples_leaf': 1, 'classifier__min_samples_split': 10, 'classifier__n_estimators': 200}	1	normalizer	ltsa_lle	random_forest	0
0.33	0.03	0.42	0	0.42	0	{'classifier__max_depth': 10, 'classifier__min_samples_leaf': 1, 'classifier__min_samples_split': 20, 'classifier__n_estimators': 50}	1	normalizer	ltsa_lle	random_forest	0
0.48	0.02	0.42	0	0.42	0	{'classifier__max_depth': 10, 'classifier__min_samples_leaf': 1, 'classifier__min_samples_split': 20, 'classifier__n_estimators': 100}	1	normalizer	ltsa_lle	random_forest	0
0.8	0.05	0.42	0	0.42	0	{'classifier__max_depth': 10, 'classifier__min_samples_leaf': 1, 'classifier__min_samples_split': 20, 'classifier__n_estimators': 200}	1	normalizer	ltsa_lle	random_forest	0
0.32	0.03	0.42	0	0.42	0	{'classifier__max_depth': 10, 'classifier__min_samples_leaf': 5, 'classifier__min_samples_split': 2, 'classifier__n_estimators': 50}	1	normalizer	ltsa_lle	random_forest	0
0.5	0.03	0.42	0	0.42	0	{'classifier__max_depth': 10, 'classifier__min_samples_leaf': 5, 'classifier__min_samples_split': 2, 'classifier__n_estimators': 100}	1	normalizer	ltsa_lle	random_forest	0
0.8	0.04	0.42	0	0.42	0	{'classifier__max_depth': 10, 'classifier__min_samples_leaf': 5, 'classifier__min_samples_split': 2, 'classifier__n_estimators': 200}	1	normalizer	ltsa_lle	random_forest	0
0.32	0.03	0.42	0	0.42	0	{'classifier__max_depth': 10, 'classifier__min_samples_leaf': 5, 'classifier__min_samples_split': 10, 'classifier__n_estimators': 50}	1	normalizer	ltsa_lle	random_forest	0
0.49	0.03	0.42	0	0.42	0	{'classifier__max_depth': 10, 'classifier__min_samples_leaf': 5, 'classifier__min_samples_split': 10, 'classifier__n_estimators': 100}	1	normalizer	ltsa_lle	random_forest	0
0.78	0.05	0.42	0	0.42	0	{'classifier__max_depth': 10, 'classifier__min_samples_leaf': 5, 'classifier__min_samples_split': 10, 'classifier__n_estimators': 200}	1	normalizer	ltsa_lle	random_forest	0
0.33	0.03	0.42	0	0.42	0	{'classifier__max_depth': 10, 'classifier__min_samples_leaf': 5, 'classifier__min_samples_split': 20, 'classifier__n_estimators': 50}	1	normalizer	ltsa_lle	random_forest	0
0.5	0.02	0.42	0	0.42	0	{'classifier__max_depth': 10, 'classifier__min_samples_leaf': 5, 'classifier__min_samples_split': 20, 'classifier__n_estimators': 100}	1	normalizer	ltsa_lle	random_forest	0
0.82	0.04	0.42	0	0.42	0	{'classifier__max_depth': 10, 'classifier__min_samples_leaf': 5, 'classifier__min_samples_split': 20, 'classifier__n_estimators': 200}	1	normalizer	ltsa_lle	random_forest	0
0.32	0.03	0.42	0	0.42	0	{'classifier__max_depth': 10, 'classifier__min_samples_leaf': 10, 'classifier__min_samples_split': 2, 'classifier__n_estimators': 50}	1	normalizer	ltsa_lle	random_forest	0
0.47	0.03	0.42	0	0.42	0	{'classifier__max_depth': 10, 'classifier__min_samples_leaf': 10, 'classifier__min_samples_split': 2, 'classifier__n_estimators': 100}	1	normalizer	ltsa_lle	random_forest	0
0.8	0.04	0.42	0	0.42	0	{'classifier__max_depth': 10, 'classifier__min_samples_leaf': 10, 'classifier__min_samples_split': 2, 'classifier__n_estimators': 200}	1	normalizer	ltsa_lle	random_forest	0
0.32	0.02	0.42	0	0.42	0	{'classifier__max_depth': 10, 'classifier__min_samples_leaf': 10, 'classifier__min_samples_split': 10, 'classifier__n_estimators': 50}	1	normalizer	ltsa_lle	random_forest	0
0.48	0.03	0.42	0	0.42	0	{'classifier__max_depth': 10, 'classifier__min_samples_leaf': 10, 'classifier__min_samples_split': 10, 'classifier__n_estimators': 100}	1	normalizer	ltsa_lle	random_forest	0
0.8	0.04	0.42	0	0.42	0	{'classifier__max_depth': 10, 'classifier__min_samples_leaf': 10, 'classifier__min_samples_split': 10, 'classifier__n_estimators': 200}	1	normalizer	ltsa_lle	random_forest	0
0.32	0.02	0.42	0	0.42	0	{'classifier__max_depth': 10, 'classifier__min_samples_leaf': 10, 'classifier__min_samples_split': 20, 'classifier__n_estimators': 50}	1	normalizer	ltsa_lle	random_forest	0
0.48	0.03	0.42	0	0.42	0	{'classifier__max_depth': 10, 'classifier__min_samples_leaf': 10, 'classifier__min_samples_split': 20, 'classifier__n_estimators': 100}	1	normalizer	ltsa_lle	random_forest	0
0.82	0.04	0.42	0	0.42	0	{'classifier__max_depth': 10, 'classifier__min_samples_leaf': 10, 'classifier__min_samples_split': 20, 'classifier__n_estimators': 200}	1	normalizer	ltsa_lle	random_forest	0
0.33	0.03	0.42	0	0.42	0	{'classifier__max_depth': 20, 'classifier__min_samples_leaf': 1, 'classifier__min_samples_split': 2, 'classifier__n_estimators': 50}	1	normalizer	ltsa_lle	random_forest	0
0.5	0.03	0.42	0	0.42	0	{'classifier__max_depth': 20, 'classifier__min_samples_leaf': 1, 'classifier__min_samples_split': 2, 'classifier__n_estimators': 100}	1	normalizer	ltsa_lle	random_forest	0
0.81	0.05	0.42	0	0.42	0	{'classifier__max_depth': 20, 'classifier__min_samples_leaf': 1, 'classifier__min_samples_split': 2, 'classifier__n_estimators': 200}	1	normalizer	ltsa_lle	random_forest	0
0.34	0.03	0.42	0	0.42	0	{'classifier__max_depth': 20, 'classifier__min_samples_leaf': 1, 'classifier__min_samples_split': 10, 'classifier__n_estimators': 50}	1	normalizer	ltsa_lle	random_forest	0
0.51	0.04	0.42	0	0.42	0	{'classifier__max_depth': 20, 'classifier__min_samples_leaf': 1, 'classifier__min_samples_split': 10, 'classifier__n_estimators': 100}	1	normalizer	ltsa_lle	random_forest	0
0.88	0.05	0.42	0	0.42	0	{'classifier__max_depth': 20, 'classifier__min_samples_leaf': 1, 'classifier__min_samples_split': 10, 'classifier__n_estimators': 200}	1	normalizer	ltsa_lle	random_forest	0
0.38	0.02	0.42	0	0.42	0	{'classifier__max_depth': 20, 'classifier__min_samples_leaf': 1, 'classifier__min_samples_split': 20, 'classifier__n_estimators': 50}	1	normalizer	ltsa_lle	random_forest	0
0.58	0.04	0.42	0	0.42	0	{'classifier__max_depth': 20, 'classifier__min_samples_leaf': 1, 'classifier__min_samples_split': 20, 'classifier__n_estimators': 100}	1	normalizer	ltsa_lle	random_forest	0
0.98	0.06	0.42	0	0.42	0	{'classifier__max_depth': 20, 'classifier__min_samples_leaf': 1, 'classifier__min_samples_split': 20, 'classifier__n_estimators': 200}	1	normalizer	ltsa_lle	random_forest	0
0.4	0.03	0.42	0	0.42	0	{'classifier__max_depth': 20, 'classifier__min_samples_leaf': 5, 'classifier__min_samples_split': 2, 'classifier__n_estimators': 50}	1	normalizer	ltsa_lle	random_forest	0
0.66	0.04	0.42	0	0.42	0	{'classifier__max_depth': 20, 'classifier__min_samples_leaf': 5, 'classifier__min_samples_split': 2, 'classifier__n_estimators': 100}	1	normalizer	ltsa_lle	random_forest	0
1.04	0.06	0.42	0	0.42	0	{'classifier__max_depth': 20, 'classifier__min_samples_leaf': 5, 'classifier__min_samples_split': 2, 'classifier__n_estimators': 200}	1	normalizer	ltsa_lle	random_forest	0
0.36	0.03	0.42	0	0.42	0	{'classifier__max_depth': 20, 'classifier__min_samples_leaf': 5, 'classifier__min_samples_split': 10, 'classifier__n_estimators': 50}	1	normalizer	ltsa_lle	random_forest	0
0.59	0.03	0.42	0	0.42	0	{'classifier__max_depth': 20, 'classifier__min_samples_leaf': 5, 'classifier__min_samples_split': 10, 'classifier__n_estimators': 100}	1	normalizer	ltsa_lle	random_forest	0
0.94	0.04	0.42	0	0.42	0	{'classifier__max_depth': 20, 'classifier__min_samples_leaf': 5, 'classifier__min_samples_split': 10, 'classifier__n_estimators': 200}	1	normalizer	ltsa_lle	random_forest	0
0.4	0.03	0.42	0	0.42	0	{'classifier__max_depth': 20, 'classifier__min_samples_leaf': 5, 'classifier__min_samples_split': 20, 'classifier__n_estimators': 50}	1	normalizer	ltsa_lle	random_forest	0
0.67	0.06	0.42	0	0.42	0	{'classifier__max_depth': 20, 'classifier__min_samples_leaf': 5, 'classifier__min_samples_split': 20, 'classifier__n_estimators': 100}	1	normalizer	ltsa_lle	random_forest	0
0.98	0.05	0.42	0	0.42	0	{'classifier__max_depth': 20, 'classifier__min_samples_leaf': 5, 'classifier__min_samples_split': 20, 'classifier__n_estimators': 200}	1	normalizer	ltsa_lle	random_forest	0
0.34	0.03	0.42	0	0.42	0	{'classifier__max_depth': 20, 'classifier__min_samples_leaf': 10, 'classifier__min_samples_split': 2, 'classifier__n_estimators': 50}	1	normalizer	ltsa_lle	random_forest	0
0.51	0.03	0.42	0	0.42	0	{'classifier__max_depth': 20, 'classifier__min_samples_leaf': 10, 'classifier__min_samples_split': 2, 'classifier__n_estimators': 100}	1	normalizer	ltsa_lle	random_forest	0
0.87	0.04	0.42	0	0.42	0	{'classifier__max_depth': 20, 'classifier__min_samples_leaf': 10, 'classifier__min_samples_split': 2, 'classifier__n_estimators': 200}	1	normalizer	ltsa_lle	random_forest	0
0.33	0.04	0.42	0	0.42	0	{'classifier__max_depth': 20, 'classifier__min_samples_leaf': 10, 'classifier__min_samples_split': 10, 'classifier__n_estimators': 50}	1	normalizer	ltsa_lle	random_forest	0
0.51	0.03	0.42	0	0.42	0	{'classifier__max_depth': 20, 'classifier__min_samples_leaf': 10, 'classifier__min_samples_split': 10, 'classifier__n_estimators': 100}	1	normalizer	ltsa_lle	random_forest	0
0.83	0.04	0.42	0	0.42	0	{'classifier__max_depth': 20, 'classifier__min_samples_leaf': 10, 'classifier__min_samples_split': 10, 'classifier__n_estimators': 200}	1	normalizer	ltsa_lle	random_forest	0
0.34	0.03	0.42	0	0.42	0	{'classifier__max_depth': 20, 'classifier__min_samples_leaf': 10, 'classifier__min_samples_split': 20, 'classifier__n_estimators': 50}	1	normalizer	ltsa_lle	random_forest	0
0.51	0.02	0.42	0	0.42	0	{'classifier__max_depth': 20, 'classifier__min_samples_leaf': 10, 'classifier__min_samples_split': 20, 'classifier__n_estimators': 100}	1	normalizer	ltsa_lle	random_forest	0
0.74	0.04	0.42	0	0.42	0	{'classifier__max_depth': 20, 'classifier__min_samples_leaf': 10, 'classifier__min_samples_split': 20, 'classifier__n_estimators': 200}	1	normalizer	ltsa_lle	random_forest	0
0.14	0.01	0.42	0	0.42	0	{'classifier__max_depth': 5, 'classifier__min_samples_leaf': 1, 'classifier__min_samples_split': 2}	1	normalizer	ltsa_lle	decision_tree	0
0.16	0.01	0.42	0	0.42	0	{'classifier__max_depth': 5, 'classifier__min_samples_leaf': 1, 'classifier__min_samples_split': 10}	1	normalizer	ltsa_lle	decision_tree	0
0.16	0.02	0.42	0	0.42	0	{'classifier__max_depth': 5, 'classifier__min_samples_leaf': 1, 'classifier__min_samples_split': 20}	1	normalizer	ltsa_lle	decision_tree	0
0.17	0.02	0.42	0	0.42	0	{'classifier__max_depth': 5, 'classifier__min_samples_leaf': 5, 'classifier__min_samples_split': 2}	1	normalizer	ltsa_lle	decision_tree	0
0.18	0.02	0.42	0	0.42	0	{'classifier__max_depth': 5, 'classifier__min_samples_leaf': 5, 'classifier__min_samples_split': 10}	1	normalizer	ltsa_lle	decision_tree	0
0.16	0.03	0.42	0	0.42	0	{'classifier__max_depth': 5, 'classifier__min_samples_leaf': 5, 'classifier__min_samples_split': 20}	1	normalizer	ltsa_lle	decision_tree	0
0.18	0.02	0.42	0	0.42	0	{'classifier__max_depth': 5, 'classifier__min_samples_leaf': 10, 'classifier__min_samples_split': 2}	1	normalizer	ltsa_lle	decision_tree	0
0.18	0.02	0.42	0	0.42	0	{'classifier__max_depth': 5, 'classifier__min_samples_leaf': 10, 'classifier__min_samples_split': 10}	1	normalizer	ltsa_lle	decision_tree	0
0.16	0.02	0.42	0	0.42	0	{'classifier__max_depth': 5, 'classifier__min_samples_leaf': 10, 'classifier__min_samples_split': 20}	1	normalizer	ltsa_lle	decision_tree	0
0.16	0.02	0.42	0	0.42	0	{'classifier__max_depth': 10, 'classifier__min_samples_leaf': 1, 'classifier__min_samples_split': 2}	1	normalizer	ltsa_lle	decision_tree	0
0.16	0.03	0.42	0	0.42	0	{'classifier__max_depth': 10, 'classifier__min_samples_leaf': 1, 'classifier__min_samples_split': 10}	1	normalizer	ltsa_lle	decision_tree	0
0.18	0.02	0.42	0	0.42	0	{'classifier__max_depth': 10, 'classifier__min_samples_leaf': 1, 'classifier__min_samples_split': 20}	1	normalizer	ltsa_lle	decision_tree	0
0.17	0.01	0.42	0	0.42	0	{'classifier__max_depth': 10, 'classifier__min_samples_leaf': 5, 'classifier__min_samples_split': 2}	1	normalizer	ltsa_lle	decision_tree	0
0.18	0.02	0.42	0	0.42	0	{'classifier__max_depth': 10, 'classifier__min_samples_leaf': 5, 'classifier__min_samples_split': 10}	1	normalizer	ltsa_lle	decision_tree	0
0.19	0.02	0.42	0	0.42	0	{'classifier__max_depth': 10, 'classifier__min_samples_leaf': 5, 'classifier__min_samples_split': 20}	1	normalizer	ltsa_lle	decision_tree	0
0.16	0.01	0.42	0	0.42	0	{'classifier__max_depth': 10, 'classifier__min_samples_leaf': 10, 'classifier__min_samples_split': 2}	1	normalizer	ltsa_lle	decision_tree	0
0.16	0.03	0.42	0	0.42	0	{'classifier__max_depth': 10, 'classifier__min_samples_leaf': 10, 'classifier__min_samples_split': 10}	1	normalizer	ltsa_lle	decision_tree	0
0.19	0.02	0.42	0	0.42	0	{'classifier__max_depth': 10, 'classifier__min_samples_leaf': 10, 'classifier__min_samples_split': 20}	1	normalizer	ltsa_lle	decision_tree	0
0.19	0.02	0.42	0	0.42	0	{'classifier__max_depth': 20, 'classifier__min_samples_leaf': 1, 'classifier__min_samples_split': 2}	1	normalizer	ltsa_lle	decision_tree	0
0.15	0.02	0.42	0	0.42	0	{'classifier__max_depth': 20, 'classifier__min_samples_leaf': 1, 'classifier__min_samples_split': 10}	1	normalizer	ltsa_lle	decision_tree	0
0.17	0.03	0.42	0	0.42	0	{'classifier__max_depth': 20, 'classifier__min_samples_leaf': 1, 'classifier__min_samples_split': 20}	1	normalizer	ltsa_lle	decision_tree	0
0.19	0.01	0.42	0	0.42	0	{'classifier__max_depth': 20, 'classifier__min_samples_leaf': 5, 'classifier__min_samples_split': 2}	1	normalizer	ltsa_lle	decision_tree	0
0.17	0.02	0.42	0	0.42	0	{'classifier__max_depth': 20, 'classifier__min_samples_leaf': 5, 'classifier__min_samples_split': 10}	1	normalizer	ltsa_lle	decision_tree	0
0.18	0.02	0.42	0	0.42	0	{'classifier__max_depth': 20, 'classifier__min_samples_leaf': 5, 'classifier__min_samples_split': 20}	1	normalizer	ltsa_lle	decision_tree	0
0.17	0.02	0.42	0	0.42	0	{'classifier__max_depth': 20, 'classifier__min_samples_leaf': 10, 'classifier__min_samples_split': 2}	1	normalizer	ltsa_lle	decision_tree	0
0.17	0.02	0.42	0	0.42	0	{'classifier__max_depth': 20, 'classifier__min_samples_leaf': 10, 'classifier__min_samples_split': 10}	1	normalizer	ltsa_lle	decision_tree	0
0.17	0.02	0.42	0	0.42	0	{'classifier__max_depth': 20, 'classifier__min_samples_leaf': 10, 'classifier__min_samples_split': 20}	1	normalizer	ltsa_lle	decision_tree	0
0.89	0.01	0.42	0	0.42	0	{'classifier__alpha': 0.0001, 'classifier__hidden_layer_sizes': (50,)}	1	normalizer	truncatedsvd	mlp	0
1.22	0	0.42	0	0.42	0	{'classifier__alpha': 0.001, 'classifier__hidden_layer_sizes': (50,)}	1	normalizer	truncatedsvd	mlp	0
5.57	0.01	0.42	0	0.42	0	{'classifier__alpha': 0.001, 'classifier__hidden_layer_sizes': (100,)}	1	normalizer	truncatedsvd	mlp	0
0.99	0	0.42	0	0.42	0	{'classifier__alpha': 0.01, 'classifier__hidden_layer_sizes': (50,)}	1	normalizer	truncatedsvd	mlp	0
0.66	0.02	0.42	0	0.42	0	{'classifier__max_depth': None, 'classifier__min_samples_leaf': 1, 'classifier__min_samples_split': 2, 'classifier__n_estimators': 50}	1	yeo-johnson	ltsa_lle	random_forest	0
0.89	0.02	0.42	0	0.42	0	{'classifier__max_depth': None, 'classifier__min_samples_leaf': 1, 'classifier__min_samples_split': 2, 'classifier__n_estimators': 100}	1	yeo-johnson	ltsa_lle	random_forest	0
1.08	0.03	0.42	0	0.42	0	{'classifier__max_depth': None, 'classifier__min_samples_leaf': 1, 'classifier__min_samples_split': 2, 'classifier__n_estimators': 200}	1	yeo-johnson	ltsa_lle	random_forest	0
0.57	0.02	0.42	0	0.42	0	{'classifier__max_depth': None, 'classifier__min_samples_leaf': 1, 'classifier__min_samples_split': 10, 'classifier__n_estimators': 50}	1	yeo-johnson	ltsa_lle	random_forest	0
2.65	0.01	0.42	0	0.42	0	{'classifier__max_depth': None, 'classifier__min_samples_leaf': 1, 'classifier__min_samples_split': 10, 'classifier__n_estimators': 100}	1	yeo-johnson	ltsa_lle	random_forest	0
1.3	0.03	0.42	0	0.42	0	{'classifier__max_depth': None, 'classifier__min_samples_leaf': 1, 'classifier__min_samples_split': 10, 'classifier__n_estimators': 200}	1	yeo-johnson	ltsa_lle	random_forest	0
0.89	0.01	0.42	0	0.42	0	{'classifier__max_depth': None, 'classifier__min_samples_leaf': 1, 'classifier__min_samples_split': 20, 'classifier__n_estimators': 50}	1	yeo-johnson	ltsa_lle	random_forest	0
0.92	0.02	0.42	0	0.42	0	{'classifier__max_depth': None, 'classifier__min_samples_leaf': 1, 'classifier__min_samples_split': 20, 'classifier__n_estimators': 100}	1	yeo-johnson	ltsa_lle	random_forest	0
1.21	0.03	0.42	0	0.42	0	{'classifier__max_depth': None, 'classifier__min_samples_leaf': 1, 'classifier__min_samples_split': 20, 'classifier__n_estimators': 200}	1	yeo-johnson	ltsa_lle	random_forest	0
0.93	0.01	0.42	0	0.42	0	{'classifier__max_depth': None, 'classifier__min_samples_leaf': 5, 'classifier__min_samples_split': 2, 'classifier__n_estimators': 50}	1	yeo-johnson	ltsa_lle	random_forest	0
1.31	0.01	0.42	0	0.42	0	{'classifier__max_depth': None, 'classifier__min_samples_leaf': 5, 'classifier__min_samples_split': 2, 'classifier__n_estimators': 100}	1	yeo-johnson	ltsa_lle	random_forest	0
1.03	0.04	0.42	0	0.42	0	{'classifier__max_depth': None, 'classifier__min_samples_leaf': 5, 'classifier__min_samples_split': 2, 'classifier__n_estimators': 200}	1	yeo-johnson	ltsa_lle	random_forest	0
0.89	0.01	0.42	0	0.42	0	{'classifier__max_depth': None, 'classifier__min_samples_leaf': 5, 'classifier__min_samples_split': 10, 'classifier__n_estimators': 50}	1	yeo-johnson	ltsa_lle	random_forest	0
0.81	0.02	0.42	0	0.42	0	{'classifier__max_depth': None, 'classifier__min_samples_leaf': 5, 'classifier__min_samples_split': 10, 'classifier__n_estimators': 100}	1	yeo-johnson	ltsa_lle	random_forest	0
1.06	0.04	0.42	0	0.42	0	{'classifier__max_depth': None, 'classifier__min_samples_leaf': 5, 'classifier__min_samples_split': 10, 'classifier__n_estimators': 200}	1	yeo-johnson	ltsa_lle	random_forest	0
0.7	0.02	0.42	0	0.42	0	{'classifier__max_depth': None, 'classifier__min_samples_leaf': 5, 'classifier__min_samples_split': 20, 'classifier__n_estimators': 50}	1	yeo-johnson	ltsa_lle	random_forest	0
1.69	0.02	0.42	0	0.42	0	{'classifier__max_depth': None, 'classifier__min_samples_leaf': 5, 'classifier__min_samples_split': 20, 'classifier__n_estimators': 100}	1	yeo-johnson	ltsa_lle	random_forest	0
1.07	0.03	0.42	0	0.42	0	{'classifier__max_depth': None, 'classifier__min_samples_leaf': 5, 'classifier__min_samples_split': 20, 'classifier__n_estimators': 200}	1	yeo-johnson	ltsa_lle	random_forest	0
0.86	0.01	0.42	0	0.42	0	{'classifier__max_depth': None, 'classifier__min_samples_leaf': 10, 'classifier__min_samples_split': 2, 'classifier__n_estimators': 50}	1	yeo-johnson	ltsa_lle	random_forest	0
0.85	0.02	0.42	0	0.42	0	{'classifier__max_depth': None, 'classifier__min_samples_leaf': 10, 'classifier__min_samples_split': 2, 'classifier__n_estimators': 100}	1	yeo-johnson	ltsa_lle	random_forest	0
1.2	0.03	0.42	0	0.42	0	{'classifier__max_depth': None, 'classifier__min_samples_leaf': 10, 'classifier__min_samples_split': 2, 'classifier__n_estimators': 200}	1	yeo-johnson	ltsa_lle	random_forest	0
6.01	0.01	0.42	0	0.42	0	{'classifier__max_depth': None, 'classifier__min_samples_leaf': 10, 'classifier__min_samples_split': 10, 'classifier__n_estimators': 50}	1	yeo-johnson	ltsa_lle	random_forest	0
1.08	0.02	0.42	0	0.42	0	{'classifier__max_depth': None, 'classifier__min_samples_leaf': 10, 'classifier__min_samples_split': 10, 'classifier__n_estimators': 100}	1	yeo-johnson	ltsa_lle	random_forest	0
1.51	0.04	0.42	0	0.42	0	{'classifier__max_depth': None, 'classifier__min_samples_leaf': 10, 'classifier__min_samples_split': 10, 'classifier__n_estimators': 200}	1	yeo-johnson	ltsa_lle	random_forest	0
1.37	0.01	0.42	0	0.42	0	{'classifier__max_depth': None, 'classifier__min_samples_leaf': 10, 'classifier__min_samples_split': 20, 'classifier__n_estimators': 50}	1	yeo-johnson	ltsa_lle	random_forest	0
1.3	0.02	0.42	0	0.42	0	{'classifier__max_depth': None, 'classifier__min_samples_leaf': 10, 'classifier__min_samples_split': 20, 'classifier__n_estimators': 100}	1	yeo-johnson	ltsa_lle	random_forest	0
1.34	0.03	0.42	0	0.42	0	{'classifier__max_depth': None, 'classifier__min_samples_leaf': 10, 'classifier__min_samples_split': 20, 'classifier__n_estimators': 200}	1	yeo-johnson	ltsa_lle	random_forest	0
1.51	0.01	0.42	0	0.42	0	{'classifier__max_depth': 10, 'classifier__min_samples_leaf': 1, 'classifier__min_samples_split': 2, 'classifier__n_estimators': 50}	1	yeo-johnson	ltsa_lle	random_forest	0
0.87	0.02	0.42	0	0.42	0	{'classifier__max_depth': 10, 'classifier__min_samples_leaf': 1, 'classifier__min_samples_split': 2, 'classifier__n_estimators': 100}	1	yeo-johnson	ltsa_lle	random_forest	0
1.49	0.03	0.42	0	0.42	0	{'classifier__max_depth': 10, 'classifier__min_samples_leaf': 1, 'classifier__min_samples_split': 2, 'classifier__n_estimators': 200}	1	yeo-johnson	ltsa_lle	random_forest	0
1.49	0.01	0.42	0	0.42	0	{'classifier__max_depth': 10, 'classifier__min_samples_leaf': 1, 'classifier__min_samples_split': 10, 'classifier__n_estimators': 50}	1	yeo-johnson	ltsa_lle	random_forest	0
1.2	0.01	0.42	0	0.42	0	{'classifier__max_depth': 10, 'classifier__min_samples_leaf': 1, 'classifier__min_samples_split': 10, 'classifier__n_estimators': 100}	1	yeo-johnson	ltsa_lle	random_forest	0
1.72	0.03	0.42	0	0.42	0	{'classifier__max_depth': 10, 'classifier__min_samples_leaf': 1, 'classifier__min_samples_split': 10, 'classifier__n_estimators': 200}	1	yeo-johnson	ltsa_lle	random_forest	0
1.07	0.01	0.42	0	0.42	0	{'classifier__max_depth': 10, 'classifier__min_samples_leaf': 1, 'classifier__min_samples_split': 20, 'classifier__n_estimators': 50}	1	yeo-johnson	ltsa_lle	random_forest	0
1.77	0.01	0.42	0	0.42	0	{'classifier__max_depth': 10, 'classifier__min_samples_leaf': 1, 'classifier__min_samples_split': 20, 'classifier__n_estimators': 100}	1	yeo-johnson	ltsa_lle	random_forest	0
1.05	0.03	0.42	0	0.42	0	{'classifier__max_depth': 10, 'classifier__min_samples_leaf': 1, 'classifier__min_samples_split': 20, 'classifier__n_estimators': 200}	1	yeo-johnson	ltsa_lle	random_forest	0
1.21	0.01	0.42	0	0.42	0	{'classifier__max_depth': 10, 'classifier__min_samples_leaf': 5, 'classifier__min_samples_split': 2, 'classifier__n_estimators': 50}	1	yeo-johnson	ltsa_lle	random_forest	0
1.63	0.02	0.42	0	0.42	0	{'classifier__max_depth': 10, 'classifier__min_samples_leaf': 5, 'classifier__min_samples_split': 2, 'classifier__n_estimators': 100}	1	yeo-johnson	ltsa_lle	random_forest	0
1.05	0.05	0.42	0	0.42	0	{'classifier__max_depth': 10, 'classifier__min_samples_leaf': 5, 'classifier__min_samples_split': 2, 'classifier__n_estimators': 200}	1	yeo-johnson	ltsa_lle	random_forest	0
4.76	0.01	0.42	0	0.42	0	{'classifier__max_depth': 10, 'classifier__min_samples_leaf': 5, 'classifier__min_samples_split': 10, 'classifier__n_estimators': 50}	1	yeo-johnson	ltsa_lle	random_forest	0
1.42	0.01	0.42	0	0.42	0	{'classifier__max_depth': 10, 'classifier__min_samples_leaf': 5, 'classifier__min_samples_split': 10, 'classifier__n_estimators': 100}	1	yeo-johnson	ltsa_lle	random_forest	0
1.25	0.04	0.42	0	0.42	0	{'classifier__max_depth': 10, 'classifier__min_samples_leaf': 5, 'classifier__min_samples_split': 10, 'classifier__n_estimators': 200}	1	yeo-johnson	ltsa_lle	random_forest	0
1.71	0.01	0.42	0	0.42	0	{'classifier__max_depth': 10, 'classifier__min_samples_leaf': 5, 'classifier__min_samples_split': 20, 'classifier__n_estimators': 50}	1	yeo-johnson	ltsa_lle	random_forest	0
1.1	0.01	0.42	0	0.42	0	{'classifier__max_depth': 10, 'classifier__min_samples_leaf': 5, 'classifier__min_samples_split': 20, 'classifier__n_estimators': 100}	1	yeo-johnson	ltsa_lle	random_forest	0
1.35	0.04	0.42	0	0.42	0	{'classifier__max_depth': 10, 'classifier__min_samples_leaf': 5, 'classifier__min_samples_split': 20, 'classifier__n_estimators': 200}	1	yeo-johnson	ltsa_lle	random_forest	0
1.9	0.01	0.42	0	0.42	0	{'classifier__max_depth': 10, 'classifier__min_samples_leaf': 10, 'classifier__min_samples_split': 2, 'classifier__n_estimators': 50}	1	yeo-johnson	ltsa_lle	random_forest	0
1.06	0.01	0.42	0	0.42	0	{'classifier__max_depth': 10, 'classifier__min_samples_leaf': 10, 'classifier__min_samples_split': 2, 'classifier__n_estimators': 100}	1	yeo-johnson	ltsa_lle	random_forest	0
1.09	0.03	0.42	0	0.42	0	{'classifier__max_depth': 10, 'classifier__min_samples_leaf': 10, 'classifier__min_samples_split': 2, 'classifier__n_estimators': 200}	1	yeo-johnson	ltsa_lle	random_forest	0
0.9	0.01	0.42	0	0.42	0	{'classifier__max_depth': 10, 'classifier__min_samples_leaf': 10, 'classifier__min_samples_split': 10, 'classifier__n_estimators': 50}	1	yeo-johnson	ltsa_lle	random_forest	0
0.72	0.02	0.42	0	0.42	0	{'classifier__max_depth': 10, 'classifier__min_samples_leaf': 10, 'classifier__min_samples_split': 10, 'classifier__n_estimators': 100}	1	yeo-johnson	ltsa_lle	random_forest	0
1.98	0.04	0.42	0	0.42	0	{'classifier__max_depth': 10, 'classifier__min_samples_leaf': 10, 'classifier__min_samples_split': 10, 'classifier__n_estimators': 200}	1	yeo-johnson	ltsa_lle	random_forest	0
0.83	0.01	0.42	0	0.42	0	{'classifier__max_depth': 10, 'classifier__min_samples_leaf': 10, 'classifier__min_samples_split': 20, 'classifier__n_estimators': 50}	1	yeo-johnson	ltsa_lle	random_forest	0
0.77	0.02	0.42	0	0.42	0	{'classifier__max_depth': 10, 'classifier__min_samples_leaf': 10, 'classifier__min_samples_split': 20, 'classifier__n_estimators': 100}	1	yeo-johnson	ltsa_lle	random_forest	0
1.18	0.05	0.42	0	0.42	0	{'classifier__max_depth': 10, 'classifier__min_samples_leaf': 10, 'classifier__min_samples_split': 20, 'classifier__n_estimators': 200}	1	yeo-johnson	ltsa_lle	random_forest	0
1.12	0.01	0.42	0	0.42	0	{'classifier__max_depth': 20, 'classifier__min_samples_leaf': 1, 'classifier__min_samples_split': 2, 'classifier__n_estimators': 50}	1	yeo-johnson	ltsa_lle	random_forest	0
0.79	0.02	0.42	0	0.42	0	{'classifier__max_depth': 20, 'classifier__min_samples_leaf': 1, 'classifier__min_samples_split': 2, 'classifier__n_estimators': 100}	1	yeo-johnson	ltsa_lle	random_forest	0
1.15	0.03	0.42	0	0.42	0	{'classifier__max_depth': 20, 'classifier__min_samples_leaf': 1, 'classifier__min_samples_split': 2, 'classifier__n_estimators': 200}	1	yeo-johnson	ltsa_lle	random_forest	0
1.35	0.01	0.42	0	0.42	0	{'classifier__max_depth': 20, 'classifier__min_samples_leaf': 1, 'classifier__min_samples_split': 10, 'classifier__n_estimators': 50}	1	yeo-johnson	ltsa_lle	random_forest	0
1.05	0.02	0.42	0	0.42	0	{'classifier__max_depth': 20, 'classifier__min_samples_leaf': 1, 'classifier__min_samples_split': 10, 'classifier__n_estimators': 100}	1	yeo-johnson	ltsa_lle	random_forest	0
0.83	0.03	0.42	0	0.42	0	{'classifier__max_depth': 20, 'classifier__min_samples_leaf': 1, 'classifier__min_samples_split': 10, 'classifier__n_estimators': 200}	1	yeo-johnson	ltsa_lle	random_forest	0
0.85	0.01	0.42	0	0.42	0	{'classifier__max_depth': 20, 'classifier__min_samples_leaf': 1, 'classifier__min_samples_split': 20, 'classifier__n_estimators': 50}	1	yeo-johnson	ltsa_lle	random_forest	0
2.1	0.02	0.42	0	0.42	0	{'classifier__max_depth': 20, 'classifier__min_samples_leaf': 1, 'classifier__min_samples_split': 20, 'classifier__n_estimators': 100}	1	yeo-johnson	ltsa_lle	random_forest	0
3.28	0.03	0.42	0	0.42	0	{'classifier__max_depth': 20, 'classifier__min_samples_leaf': 1, 'classifier__min_samples_split': 20, 'classifier__n_estimators': 200}	1	yeo-johnson	ltsa_lle	random_forest	0
0.95	0.01	0.42	0	0.42	0	{'classifier__max_depth': 20, 'classifier__min_samples_leaf': 5, 'classifier__min_samples_split': 2, 'classifier__n_estimators': 50}	1	yeo-johnson	ltsa_lle	random_forest	0
0.97	0.02	0.42	0	0.42	0	{'classifier__max_depth': 20, 'classifier__min_samples_leaf': 5, 'classifier__min_samples_split': 2, 'classifier__n_estimators': 100}	1	yeo-johnson	ltsa_lle	random_forest	0
1.58	0.03	0.42	0	0.42	0	{'classifier__max_depth': 20, 'classifier__min_samples_leaf': 5, 'classifier__min_samples_split': 2, 'classifier__n_estimators': 200}	1	yeo-johnson	ltsa_lle	random_forest	0
0.57	0.02	0.42	0	0.42	0	{'classifier__max_depth': 20, 'classifier__min_samples_leaf': 5, 'classifier__min_samples_split': 10, 'classifier__n_estimators': 50}	1	yeo-johnson	ltsa_lle	random_forest	0
1.06	0.01	0.42	0	0.42	0	{'classifier__max_depth': 20, 'classifier__min_samples_leaf': 5, 'classifier__min_samples_split': 10, 'classifier__n_estimators': 100}	1	yeo-johnson	ltsa_lle	random_forest	0
1.33	0.03	0.42	0	0.42	0	{'classifier__max_depth': 20, 'classifier__min_samples_leaf': 5, 'classifier__min_samples_split': 10, 'classifier__n_estimators': 200}	1	yeo-johnson	ltsa_lle	random_forest	0
0.9	0.01	0.42	0	0.42	0	{'classifier__max_depth': 20, 'classifier__min_samples_leaf': 5, 'classifier__min_samples_split': 20, 'classifier__n_estimators': 50}	1	yeo-johnson	ltsa_lle	random_forest	0
0.75	0.02	0.42	0	0.42	0	{'classifier__max_depth': 20, 'classifier__min_samples_leaf': 5, 'classifier__min_samples_split': 20, 'classifier__n_estimators': 100}	1	yeo-johnson	ltsa_lle	random_forest	0
1.1	0.03	0.42	0	0.42	0	{'classifier__max_depth': 20, 'classifier__min_samples_leaf': 5, 'classifier__min_samples_split': 20, 'classifier__n_estimators': 200}	1	yeo-johnson	ltsa_lle	random_forest	0
1.92	0.01	0.42	0	0.42	0	{'classifier__max_depth': 20, 'classifier__min_samples_leaf': 10, 'classifier__min_samples_split': 2, 'classifier__n_estimators': 50}	1	yeo-johnson	ltsa_lle	random_forest	0
1.17	0.03	0.42	0	0.42	0	{'classifier__max_depth': 20, 'classifier__min_samples_leaf': 10, 'classifier__min_samples_split': 2, 'classifier__n_estimators': 100}	1	yeo-johnson	ltsa_lle	random_forest	0
4	0.03	0.42	0	0.42	0	{'classifier__max_depth': 20, 'classifier__min_samples_leaf': 10, 'classifier__min_samples_split': 2, 'classifier__n_estimators': 200}	1	yeo-johnson	ltsa_lle	random_forest	0
1.25	0.01	0.42	0	0.42	0	{'classifier__max_depth': 20, 'classifier__min_samples_leaf': 10, 'classifier__min_samples_split': 10, 'classifier__n_estimators': 50}	1	yeo-johnson	ltsa_lle	random_forest	0
1.34	0.02	0.42	0	0.42	0	{'classifier__max_depth': 20, 'classifier__min_samples_leaf': 10, 'classifier__min_samples_split': 10, 'classifier__n_estimators': 100}	1	yeo-johnson	ltsa_lle	random_forest	0
2.13	0.03	0.42	0	0.42	0	{'classifier__max_depth': 20, 'classifier__min_samples_leaf': 10, 'classifier__min_samples_split': 10, 'classifier__n_estimators': 200}	1	yeo-johnson	ltsa_lle	random_forest	0
0.62	0.01	0.42	0	0.42	0	{'classifier__max_depth': 20, 'classifier__min_samples_leaf': 10, 'classifier__min_samples_split': 20, 'classifier__n_estimators': 50}	1	yeo-johnson	ltsa_lle	random_forest	0
11.43	0.02	0.42	0	0.42	0	{'classifier__max_depth': 20, 'classifier__min_samples_leaf': 10, 'classifier__min_samples_split': 20, 'classifier__n_estimators': 100}	1	yeo-johnson	ltsa_lle	random_forest	0
2.33	0.02	0.42	0	0.42	0	{'classifier__max_depth': 20, 'classifier__min_samples_leaf': 10, 'classifier__min_samples_split': 20, 'classifier__n_estimators': 200}	1	yeo-johnson	ltsa_lle	random_forest	0
0.78	0.01	0.42	0	0.42	0	{'classifier__max_depth': 5, 'classifier__min_samples_leaf': 1, 'classifier__min_samples_split': 2}	1	yeo-johnson	ltsa_lle	decision_tree	0
0.62	0.01	0.42	0	0.42	0	{'classifier__max_depth': 5, 'classifier__min_samples_leaf': 1, 'classifier__min_samples_split': 10}	1	yeo-johnson	ltsa_lle	decision_tree	0
0.38	0.02	0.42	0	0.42	0	{'classifier__max_depth': 5, 'classifier__min_samples_leaf': 1, 'classifier__min_samples_split': 20}	1	yeo-johnson	ltsa_lle	decision_tree	0
1	0.01	0.42	0	0.42	0	{'classifier__max_depth': 5, 'classifier__min_samples_leaf': 5, 'classifier__min_samples_split': 2}	1	yeo-johnson	ltsa_lle	decision_tree	0
0.54	0.01	0.42	0	0.42	0	{'classifier__max_depth': 5, 'classifier__min_samples_leaf': 5, 'classifier__min_samples_split': 10}	1	yeo-johnson	ltsa_lle	decision_tree	0
0.47	0.01	0.42	0	0.42	0	{'classifier__max_depth': 5, 'classifier__min_samples_leaf': 5, 'classifier__min_samples_split': 20}	1	yeo-johnson	ltsa_lle	decision_tree	0
0.43	0.02	0.42	0	0.42	0	{'classifier__max_depth': 5, 'classifier__min_samples_leaf': 10, 'classifier__min_samples_split': 2}	1	yeo-johnson	ltsa_lle	decision_tree	0
0.79	0.01	0.42	0	0.42	0	{'classifier__max_depth': 5, 'classifier__min_samples_leaf': 10, 'classifier__min_samples_split': 10}	1	yeo-johnson	ltsa_lle	decision_tree	0
0.85	0.01	0.42	0	0.42	0	{'classifier__max_depth': 5, 'classifier__min_samples_leaf': 10, 'classifier__min_samples_split': 20}	1	yeo-johnson	ltsa_lle	decision_tree	0
0.51	0.01	0.42	0	0.42	0	{'classifier__max_depth': 10, 'classifier__min_samples_leaf': 1, 'classifier__min_samples_split': 2}	1	yeo-johnson	ltsa_lle	decision_tree	0
0.55	0.01	0.42	0	0.42	0	{'classifier__max_depth': 10, 'classifier__min_samples_leaf': 1, 'classifier__min_samples_split': 10}	1	yeo-johnson	ltsa_lle	decision_tree	0
0.81	0.01	0.42	0	0.42	0	{'classifier__max_depth': 10, 'classifier__min_samples_leaf': 1, 'classifier__min_samples_split': 20}	1	yeo-johnson	ltsa_lle	decision_tree	0
0.63	0.01	0.42	0	0.42	0	{'classifier__max_depth': 10, 'classifier__min_samples_leaf': 5, 'classifier__min_samples_split': 2}	1	yeo-johnson	ltsa_lle	decision_tree	0
0.53	0.01	0.42	0	0.42	0	{'classifier__max_depth': 10, 'classifier__min_samples_leaf': 5, 'classifier__min_samples_split': 10}	1	yeo-johnson	ltsa_lle	decision_tree	0
0.65	0.01	0.42	0	0.42	0	{'classifier__max_depth': 10, 'classifier__min_samples_leaf': 5, 'classifier__min_samples_split': 20}	1	yeo-johnson	ltsa_lle	decision_tree	0
0.67	0.01	0.42	0	0.42	0	{'classifier__max_depth': 10, 'classifier__min_samples_leaf': 10, 'classifier__min_samples_split': 2}	1	yeo-johnson	ltsa_lle	decision_tree	0
1.4	0.01	0.42	0	0.42	0	{'classifier__max_depth': 10, 'classifier__min_samples_leaf': 10, 'classifier__min_samples_split': 10}	1	yeo-johnson	ltsa_lle	decision_tree	0
1.61	0.01	0.42	0	0.42	0	{'classifier__max_depth': 10, 'classifier__min_samples_leaf': 10, 'classifier__min_samples_split': 20}	1	yeo-johnson	ltsa_lle	decision_tree	0
0.76	0.01	0.42	0	0.42	0	{'classifier__max_depth': 20, 'classifier__min_samples_leaf': 1, 'classifier__min_samples_split': 2}	1	yeo-johnson	ltsa_lle	decision_tree	0
0.94	0.01	0.42	0	0.42	0	{'classifier__max_depth': 20, 'classifier__min_samples_leaf': 1, 'classifier__min_samples_split': 10}	1	yeo-johnson	ltsa_lle	decision_tree	0
1.78	0.01	0.42	0	0.42	0	{'classifier__max_depth': 20, 'classifier__min_samples_leaf': 1, 'classifier__min_samples_split': 20}	1	yeo-johnson	ltsa_lle	decision_tree	0
0.84	0.01	0.42	0	0.42	0	{'classifier__max_depth': 20, 'classifier__min_samples_leaf': 5, 'classifier__min_samples_split': 2}	1	yeo-johnson	ltsa_lle	decision_tree	0
0.84	0.01	0.42	0	0.42	0	{'classifier__max_depth': 20, 'classifier__min_samples_leaf': 5, 'classifier__min_samples_split': 10}	1	yeo-johnson	ltsa_lle	decision_tree	0
0.66	0.01	0.42	0	0.42	0	{'classifier__max_depth': 20, 'classifier__min_samples_leaf': 5, 'classifier__min_samples_split': 20}	1	yeo-johnson	ltsa_lle	decision_tree	0
0.48	0.01	0.42	0	0.42	0	{'classifier__max_depth': 20, 'classifier__min_samples_leaf': 10, 'classifier__min_samples_split': 2}	1	yeo-johnson	ltsa_lle	decision_tree	0
1.15	0.01	0.42	0	0.42	0	{'classifier__max_depth': 20, 'classifier__min_samples_leaf': 10, 'classifier__min_samples_split': 10}	1	yeo-johnson	ltsa_lle	decision_tree	0
0.74	0.01	0.42	0	0.42	0	{'classifier__max_depth': 20, 'classifier__min_samples_leaf': 10, 'classifier__min_samples_split': 20}	1	yeo-johnson	ltsa_lle	decision_tree	0
0.41	0.03	0.42	0.01	0.42	0.01	{'classifier__C': 0.1, 'classifier__gamma': 'scale'}	2	quantile-normal	random_projection	svm_sigmoid	0
0.35	0.09	0.42	0	0.42	0	{'classifier__max_depth': None, 'classifier__min_samples_leaf': 1, 'classifier__min_samples_split': 2, 'classifier__n_estimators': 50}	1	quantile-normal	ltsa_lle	random_forest	0
0.5	0.07	0.42	0	0.42	0	{'classifier__max_depth': None, 'classifier__min_samples_leaf': 1, 'classifier__min_samples_split': 2, 'classifier__n_estimators': 100}	1	quantile-normal	ltsa_lle	random_forest	0
0.76	0.11	0.42	0	0.42	0	{'classifier__max_depth': None, 'classifier__min_samples_leaf': 1, 'classifier__min_samples_split': 2, 'classifier__n_estimators': 200}	1	quantile-normal	ltsa_lle	random_forest	0
0.45	0.07	0.42	0	0.42	0	{'classifier__max_depth': None, 'classifier__min_samples_leaf': 1, 'classifier__min_samples_split': 10, 'classifier__n_estimators': 50}	1	quantile-normal	ltsa_lle	random_forest	0
0.61	0.09	0.42	0	0.42	0	{'classifier__max_depth': None, 'classifier__min_samples_leaf': 1, 'classifier__min_samples_split': 10, 'classifier__n_estimators': 100}	1	quantile-normal	ltsa_lle	random_forest	0
0.78	0.09	0.42	0	0.42	0	{'classifier__max_depth': None, 'classifier__min_samples_leaf': 1, 'classifier__min_samples_split': 10, 'classifier__n_estimators': 200}	1	quantile-normal	ltsa_lle	random_forest	0
0.39	0.08	0.42	0	0.42	0	{'classifier__max_depth': None, 'classifier__min_samples_leaf': 1, 'classifier__min_samples_split': 20, 'classifier__n_estimators': 50}	1	quantile-normal	ltsa_lle	random_forest	0
0.55	0.07	0.42	0	0.42	0	{'classifier__max_depth': None, 'classifier__min_samples_leaf': 1, 'classifier__min_samples_split': 20, 'classifier__n_estimators': 100}	1	quantile-normal	ltsa_lle	random_forest	0
0.79	0.09	0.42	0	0.42	0	{'classifier__max_depth': None, 'classifier__min_samples_leaf': 1, 'classifier__min_samples_split': 20, 'classifier__n_estimators': 200}	1	quantile-normal	ltsa_lle	random_forest	0
0.4	0.07	0.42	0	0.42	0	{'classifier__max_depth': None, 'classifier__min_samples_leaf': 5, 'classifier__min_samples_split': 2, 'classifier__n_estimators': 50}	1	quantile-normal	ltsa_lle	random_forest	0
0.53	0.08	0.42	0	0.42	0	{'classifier__max_depth': None, 'classifier__min_samples_leaf': 5, 'classifier__min_samples_split': 2, 'classifier__n_estimators': 100}	1	quantile-normal	ltsa_lle	random_forest	0
0.78	0.09	0.42	0	0.42	0	{'classifier__max_depth': None, 'classifier__min_samples_leaf': 5, 'classifier__min_samples_split': 2, 'classifier__n_estimators': 200}	1	quantile-normal	ltsa_lle	random_forest	0
0.4	0.08	0.42	0	0.42	0	{'classifier__max_depth': None, 'classifier__min_samples_leaf': 5, 'classifier__min_samples_split': 10, 'classifier__n_estimators': 50}	1	quantile-normal	ltsa_lle	random_forest	0
0.52	0.08	0.42	0	0.42	0	{'classifier__max_depth': None, 'classifier__min_samples_leaf': 5, 'classifier__min_samples_split': 10, 'classifier__n_estimators': 100}	1	quantile-normal	ltsa_lle	random_forest	0
0.78	0.1	0.42	0	0.42	0	{'classifier__max_depth': None, 'classifier__min_samples_leaf': 5, 'classifier__min_samples_split': 10, 'classifier__n_estimators': 200}	1	quantile-normal	ltsa_lle	random_forest	0
0.41	0.08	0.42	0	0.42	0	{'classifier__max_depth': None, 'classifier__min_samples_leaf': 5, 'classifier__min_samples_split': 20, 'classifier__n_estimators': 50}	1	quantile-normal	ltsa_lle	random_forest	0
0.55	0.09	0.42	0	0.42	0	{'classifier__max_depth': None, 'classifier__min_samples_leaf': 5, 'classifier__min_samples_split': 20, 'classifier__n_estimators': 100}	1	quantile-normal	ltsa_lle	random_forest	0
0.82	0.1	0.42	0	0.42	0	{'classifier__max_depth': None, 'classifier__min_samples_leaf': 5, 'classifier__min_samples_split': 20, 'classifier__n_estimators': 200}	1	quantile-normal	ltsa_lle	random_forest	0
0.41	0.09	0.42	0	0.42	0	{'classifier__max_depth': None, 'classifier__min_samples_leaf': 10, 'classifier__min_samples_split': 2, 'classifier__n_estimators': 50}	1	quantile-normal	ltsa_lle	random_forest	0
0.54	0.08	0.42	0	0.42	0	{'classifier__max_depth': None, 'classifier__min_samples_leaf': 10, 'classifier__min_samples_split': 2, 'classifier__n_estimators': 100}	1	quantile-normal	ltsa_lle	random_forest	0
0.8	0.09	0.42	0	0.42	0	{'classifier__max_depth': None, 'classifier__min_samples_leaf': 10, 'classifier__min_samples_split': 2, 'classifier__n_estimators': 200}	1	quantile-normal	ltsa_lle	random_forest	0
0.41	0.08	0.42	0	0.42	0	{'classifier__max_depth': None, 'classifier__min_samples_leaf': 10, 'classifier__min_samples_split': 10, 'classifier__n_estimators': 50}	1	quantile-normal	ltsa_lle	random_forest	0
0.54	0.09	0.42	0	0.42	0	{'classifier__max_depth': None, 'classifier__min_samples_leaf': 10, 'classifier__min_samples_split': 10, 'classifier__n_estimators': 100}	1	quantile-normal	ltsa_lle	random_forest	0
0.83	0.1	0.42	0	0.42	0	{'classifier__max_depth': None, 'classifier__min_samples_leaf': 10, 'classifier__min_samples_split': 10, 'classifier__n_estimators': 200}	1	quantile-normal	ltsa_lle	random_forest	0
0.41	0.08	0.42	0	0.42	0	{'classifier__max_depth': None, 'classifier__min_samples_leaf': 10, 'classifier__min_samples_split': 20, 'classifier__n_estimators': 50}	1	quantile-normal	ltsa_lle	random_forest	0
0.54	0.08	0.42	0	0.42	0	{'classifier__max_depth': None, 'classifier__min_samples_leaf': 10, 'classifier__min_samples_split': 20, 'classifier__n_estimators': 100}	1	quantile-normal	ltsa_lle	random_forest	0
0.82	0.09	0.42	0	0.42	0	{'classifier__max_depth': None, 'classifier__min_samples_leaf': 10, 'classifier__min_samples_split': 20, 'classifier__n_estimators': 200}	1	quantile-normal	ltsa_lle	random_forest	0
0.42	0.08	0.42	0	0.42	0	{'classifier__max_depth': 10, 'classifier__min_samples_leaf': 1, 'classifier__min_samples_split': 2, 'classifier__n_estimators': 50}	1	quantile-normal	ltsa_lle	random_forest	0
0.55	0.09	0.42	0	0.42	0	{'classifier__max_depth': 10, 'classifier__min_samples_leaf': 1, 'classifier__min_samples_split': 2, 'classifier__n_estimators': 100}	1	quantile-normal	ltsa_lle	random_forest	0
0.83	0.1	0.42	0	0.42	0	{'classifier__max_depth': 10, 'classifier__min_samples_leaf': 1, 'classifier__min_samples_split': 2, 'classifier__n_estimators': 200}	1	quantile-normal	ltsa_lle	random_forest	0
0.41	0.09	0.42	0	0.42	0	{'classifier__max_depth': 10, 'classifier__min_samples_leaf': 1, 'classifier__min_samples_split': 10, 'classifier__n_estimators': 50}	1	quantile-normal	ltsa_lle	random_forest	0
0.55	0.09	0.42	0	0.42	0	{'classifier__max_depth': 10, 'classifier__min_samples_leaf': 1, 'classifier__min_samples_split': 10, 'classifier__n_estimators': 100}	1	quantile-normal	ltsa_lle	random_forest	0
0.83	0.1	0.42	0	0.42	0	{'classifier__max_depth': 10, 'classifier__min_samples_leaf': 1, 'classifier__min_samples_split': 10, 'classifier__n_estimators': 200}	1	quantile-normal	ltsa_lle	random_forest	0
0.42	0.09	0.42	0	0.42	0	{'classifier__max_depth': 10, 'classifier__min_samples_leaf': 1, 'classifier__min_samples_split': 20, 'classifier__n_estimators': 50}	1	quantile-normal	ltsa_lle	random_forest	0
0.55	0.09	0.42	0	0.42	0	{'classifier__max_depth': 10, 'classifier__min_samples_leaf': 1, 'classifier__min_samples_split': 20, 'classifier__n_estimators': 100}	1	quantile-normal	ltsa_lle	random_forest	0
0.83	0.1	0.42	0	0.42	0	{'classifier__max_depth': 10, 'classifier__min_samples_leaf': 1, 'classifier__min_samples_split': 20, 'classifier__n_estimators': 200}	1	quantile-normal	ltsa_lle	random_forest	0
0.42	0.08	0.42	0	0.42	0	{'classifier__max_depth': 10, 'classifier__min_samples_leaf': 5, 'classifier__min_samples_split': 2, 'classifier__n_estimators': 50}	1	quantile-normal	ltsa_lle	random_forest	0
0.55	0.09	0.42	0	0.42	0	{'classifier__max_depth': 10, 'classifier__min_samples_leaf': 5, 'classifier__min_samples_split': 2, 'classifier__n_estimators': 100}	1	quantile-normal	ltsa_lle	random_forest	0
0.84	0.1	0.42	0	0.42	0	{'classifier__max_depth': 10, 'classifier__min_samples_leaf': 5, 'classifier__min_samples_split': 2, 'classifier__n_estimators': 200}	1	quantile-normal	ltsa_lle	random_forest	0
0.44	0.08	0.42	0	0.42	0	{'classifier__max_depth': 10, 'classifier__min_samples_leaf': 5, 'classifier__min_samples_split': 10, 'classifier__n_estimators': 50}	1	quantile-normal	ltsa_lle	random_forest	0
0.56	0.09	0.42	0	0.42	0	{'classifier__max_depth': 10, 'classifier__min_samples_leaf': 5, 'classifier__min_samples_split': 10, 'classifier__n_estimators': 100}	1	quantile-normal	ltsa_lle	random_forest	0
0.85	0.09	0.42	0	0.42	0	{'classifier__max_depth': 10, 'classifier__min_samples_leaf': 5, 'classifier__min_samples_split': 10, 'classifier__n_estimators': 200}	1	quantile-normal	ltsa_lle	random_forest	0
0.44	0.08	0.42	0	0.42	0	{'classifier__max_depth': 10, 'classifier__min_samples_leaf': 5, 'classifier__min_samples_split': 20, 'classifier__n_estimators': 50}	1	quantile-normal	ltsa_lle	random_forest	0
0.58	0.09	0.42	0	0.42	0	{'classifier__max_depth': 10, 'classifier__min_samples_leaf': 5, 'classifier__min_samples_split': 20, 'classifier__n_estimators': 100}	1	quantile-normal	ltsa_lle	random_forest	0
0.87	0.09	0.42	0	0.42	0	{'classifier__max_depth': 10, 'classifier__min_samples_leaf': 5, 'classifier__min_samples_split': 20, 'classifier__n_estimators': 200}	1	quantile-normal	ltsa_lle	random_forest	0
0.45	0.08	0.42	0	0.42	0	{'classifier__max_depth': 10, 'classifier__min_samples_leaf': 10, 'classifier__min_samples_split': 2, 'classifier__n_estimators': 50}	1	quantile-normal	ltsa_lle	random_forest	0
0.58	0.09	0.42	0	0.42	0	{'classifier__max_depth': 10, 'classifier__min_samples_leaf': 10, 'classifier__min_samples_split': 2, 'classifier__n_estimators': 100}	1	quantile-normal	ltsa_lle	random_forest	0
0.87	0.1	0.42	0	0.42	0	{'classifier__max_depth': 10, 'classifier__min_samples_leaf': 10, 'classifier__min_samples_split': 2, 'classifier__n_estimators': 200}	1	quantile-normal	ltsa_lle	random_forest	0
0.43	0.09	0.42	0	0.42	0	{'classifier__max_depth': 10, 'classifier__min_samples_leaf': 10, 'classifier__min_samples_split': 10, 'classifier__n_estimators': 50}	1	quantile-normal	ltsa_lle	random_forest	0
0.57	0.09	0.42	0	0.42	0	{'classifier__max_depth': 10, 'classifier__min_samples_leaf': 10, 'classifier__min_samples_split': 10, 'classifier__n_estimators': 100}	1	quantile-normal	ltsa_lle	random_forest	0
0.88	0.1	0.42	0	0.42	0	{'classifier__max_depth': 10, 'classifier__min_samples_leaf': 10, 'classifier__min_samples_split': 10, 'classifier__n_estimators': 200}	1	quantile-normal	ltsa_lle	random_forest	0
0.43	0.08	0.42	0	0.42	0	{'classifier__max_depth': 10, 'classifier__min_samples_leaf': 10, 'classifier__min_samples_split': 20, 'classifier__n_estimators': 50}	1	quantile-normal	ltsa_lle	random_forest	0
0.58	0.1	0.42	0	0.42	0	{'classifier__max_depth': 10, 'classifier__min_samples_leaf': 10, 'classifier__min_samples_split': 20, 'classifier__n_estimators': 100}	1	quantile-normal	ltsa_lle	random_forest	0
0.85	0.09	0.42	0	0.42	0	{'classifier__max_depth': 10, 'classifier__min_samples_leaf': 10, 'classifier__min_samples_split': 20, 'classifier__n_estimators': 200}	1	quantile-normal	ltsa_lle	random_forest	0
0.44	0.09	0.42	0	0.42	0	{'classifier__max_depth': 20, 'classifier__min_samples_leaf': 1, 'classifier__min_samples_split': 2, 'classifier__n_estimators': 50}	1	quantile-normal	ltsa_lle	random_forest	0
0.57	0.1	0.42	0	0.42	0	{'classifier__max_depth': 20, 'classifier__min_samples_leaf': 1, 'classifier__min_samples_split': 2, 'classifier__n_estimators': 100}	1	quantile-normal	ltsa_lle	random_forest	0
0.87	0.1	0.42	0	0.42	0	{'classifier__max_depth': 20, 'classifier__min_samples_leaf': 1, 'classifier__min_samples_split': 2, 'classifier__n_estimators': 200}	1	quantile-normal	ltsa_lle	random_forest	0
0.44	0.09	0.42	0	0.42	0	{'classifier__max_depth': 20, 'classifier__min_samples_leaf': 1, 'classifier__min_samples_split': 10, 'classifier__n_estimators': 50}	1	quantile-normal	ltsa_lle	random_forest	0
0.59	0.09	0.42	0	0.42	0	{'classifier__max_depth': 20, 'classifier__min_samples_leaf': 1, 'classifier__min_samples_split': 10, 'classifier__n_estimators': 100}	1	quantile-normal	ltsa_lle	random_forest	0
0.88	0.11	0.42	0	0.42	0	{'classifier__max_depth': 20, 'classifier__min_samples_leaf': 1, 'classifier__min_samples_split': 10, 'classifier__n_estimators': 200}	1	quantile-normal	ltsa_lle	random_forest	0
0.44	0.09	0.42	0	0.42	0	{'classifier__max_depth': 20, 'classifier__min_samples_leaf': 1, 'classifier__min_samples_split': 20, 'classifier__n_estimators': 50}	1	quantile-normal	ltsa_lle	random_forest	0
0.58	0.09	0.42	0	0.42	0	{'classifier__max_depth': 20, 'classifier__min_samples_leaf': 1, 'classifier__min_samples_split': 20, 'classifier__n_estimators': 100}	1	quantile-normal	ltsa_lle	random_forest	0
0.88	0.1	0.42	0	0.42	0	{'classifier__max_depth': 20, 'classifier__min_samples_leaf': 1, 'classifier__min_samples_split': 20, 'classifier__n_estimators': 200}	1	quantile-normal	ltsa_lle	random_forest	0
0.45	0.1	0.42	0	0.42	0	{'classifier__max_depth': 20, 'classifier__min_samples_leaf': 5, 'classifier__min_samples_split': 2, 'classifier__n_estimators': 50}	1	quantile-normal	ltsa_lle	random_forest	0
0.58	0.09	0.42	0	0.42	0	{'classifier__max_depth': 20, 'classifier__min_samples_leaf': 5, 'classifier__min_samples_split': 2, 'classifier__n_estimators': 100}	1	quantile-normal	ltsa_lle	random_forest	0
0.88	0.09	0.42	0	0.42	0	{'classifier__max_depth': 20, 'classifier__min_samples_leaf': 5, 'classifier__min_samples_split': 2, 'classifier__n_estimators': 200}	1	quantile-normal	ltsa_lle	random_forest	0
0.44	0.08	0.42	0	0.42	0	{'classifier__max_depth': 20, 'classifier__min_samples_leaf': 5, 'classifier__min_samples_split': 10, 'classifier__n_estimators': 50}	1	quantile-normal	ltsa_lle	random_forest	0
0.58	0.1	0.42	0	0.42	0	{'classifier__max_depth': 20, 'classifier__min_samples_leaf': 5, 'classifier__min_samples_split': 10, 'classifier__n_estimators': 100}	1	quantile-normal	ltsa_lle	random_forest	0
0.89	0.11	0.42	0	0.42	0	{'classifier__max_depth': 20, 'classifier__min_samples_leaf': 5, 'classifier__min_samples_split': 10, 'classifier__n_estimators': 200}	1	quantile-normal	ltsa_lle	random_forest	0
0.44	0.1	0.42	0	0.42	0	{'classifier__max_depth': 20, 'classifier__min_samples_leaf': 5, 'classifier__min_samples_split': 20, 'classifier__n_estimators': 50}	1	quantile-normal	ltsa_lle	random_forest	0
0.61	0.09	0.42	0	0.42	0	{'classifier__max_depth': 20, 'classifier__min_samples_leaf': 5, 'classifier__min_samples_split': 20, 'classifier__n_estimators': 100}	1	quantile-normal	ltsa_lle	random_forest	0
0.88	0.1	0.42	0	0.42	0	{'classifier__max_depth': 20, 'classifier__min_samples_leaf': 5, 'classifier__min_samples_split': 20, 'classifier__n_estimators': 200}	1	quantile-normal	ltsa_lle	random_forest	0
0.44	0.09	0.42	0	0.42	0	{'classifier__max_depth': 20, 'classifier__min_samples_leaf': 10, 'classifier__min_samples_split': 2, 'classifier__n_estimators': 50}	1	quantile-normal	ltsa_lle	random_forest	0
0.58	0.09	0.42	0	0.42	0	{'classifier__max_depth': 20, 'classifier__min_samples_leaf': 10, 'classifier__min_samples_split': 2, 'classifier__n_estimators': 100}	1	quantile-normal	ltsa_lle	random_forest	0
0.86	0.1	0.42	0	0.42	0	{'classifier__max_depth': 20, 'classifier__min_samples_leaf': 10, 'classifier__min_samples_split': 2, 'classifier__n_estimators': 200}	1	quantile-normal	ltsa_lle	random_forest	0
0.44	0.09	0.42	0	0.42	0	{'classifier__max_depth': 20, 'classifier__min_samples_leaf': 10, 'classifier__min_samples_split': 10, 'classifier__n_estimators': 50}	1	quantile-normal	ltsa_lle	random_forest	0
0.59	0.09	0.42	0	0.42	0	{'classifier__max_depth': 20, 'classifier__min_samples_leaf': 10, 'classifier__min_samples_split': 10, 'classifier__n_estimators': 100}	1	quantile-normal	ltsa_lle	random_forest	0
0.88	0.11	0.42	0	0.42	0	{'classifier__max_depth': 20, 'classifier__min_samples_leaf': 10, 'classifier__min_samples_split': 10, 'classifier__n_estimators': 200}	1	quantile-normal	ltsa_lle	random_forest	0
0.44	0.09	0.42	0	0.42	0	{'classifier__max_depth': 20, 'classifier__min_samples_leaf': 10, 'classifier__min_samples_split': 20, 'classifier__n_estimators': 50}	1	quantile-normal	ltsa_lle	random_forest	0
0.57	0.1	0.42	0	0.42	0	{'classifier__max_depth': 20, 'classifier__min_samples_leaf': 10, 'classifier__min_samples_split': 20, 'classifier__n_estimators': 100}	1	quantile-normal	ltsa_lle	random_forest	0
0.84	0.09	0.42	0	0.42	0	{'classifier__max_depth': 20, 'classifier__min_samples_leaf': 10, 'classifier__min_samples_split': 20, 'classifier__n_estimators': 200}	1	quantile-normal	ltsa_lle	random_forest	0
0.23	0.07	0.42	0	0.42	0	{'classifier__max_depth': 5, 'classifier__min_samples_leaf': 1, 'classifier__min_samples_split': 2}	1	quantile-normal	ltsa_lle	decision_tree	0
0.29	0.08	0.42	0	0.42	0	{'classifier__max_depth': 5, 'classifier__min_samples_leaf': 1, 'classifier__min_samples_split': 10}	1	quantile-normal	ltsa_lle	decision_tree	0
0.28	0.06	0.42	0	0.42	0	{'classifier__max_depth': 5, 'classifier__min_samples_leaf': 1, 'classifier__min_samples_split': 20}	1	quantile-normal	ltsa_lle	decision_tree	0
0.29	0.08	0.42	0	0.42	0	{'classifier__max_depth': 5, 'classifier__min_samples_leaf': 5, 'classifier__min_samples_split': 2}	1	quantile-normal	ltsa_lle	decision_tree	0
0.29	0.08	0.42	0	0.42	0	{'classifier__max_depth': 5, 'classifier__min_samples_leaf': 5, 'classifier__min_samples_split': 10}	1	quantile-normal	ltsa_lle	decision_tree	0
0.29	0.08	0.42	0	0.42	0	{'classifier__max_depth': 5, 'classifier__min_samples_leaf': 5, 'classifier__min_samples_split': 20}	1	quantile-normal	ltsa_lle	decision_tree	0
0.3	0.08	0.42	0	0.42	0	{'classifier__max_depth': 5, 'classifier__min_samples_leaf': 10, 'classifier__min_samples_split': 2}	1	quantile-normal	ltsa_lle	decision_tree	0
0.28	0.09	0.42	0	0.42	0	{'classifier__max_depth': 5, 'classifier__min_samples_leaf': 10, 'classifier__min_samples_split': 10}	1	quantile-normal	ltsa_lle	decision_tree	0
0.29	0.08	0.42	0	0.42	0	{'classifier__max_depth': 5, 'classifier__min_samples_leaf': 10, 'classifier__min_samples_split': 20}	1	quantile-normal	ltsa_lle	decision_tree	0
0.29	0.08	0.42	0	0.42	0	{'classifier__max_depth': 10, 'classifier__min_samples_leaf': 1, 'classifier__min_samples_split': 2}	1	quantile-normal	ltsa_lle	decision_tree	0
0.29	0.08	0.42	0	0.42	0	{'classifier__max_depth': 10, 'classifier__min_samples_leaf': 1, 'classifier__min_samples_split': 10}	1	quantile-normal	ltsa_lle	decision_tree	0
0.3	0.08	0.42	0	0.42	0	{'classifier__max_depth': 10, 'classifier__min_samples_leaf': 1, 'classifier__min_samples_split': 20}	1	quantile-normal	ltsa_lle	decision_tree	0
0.29	0.08	0.42	0	0.42	0	{'classifier__max_depth': 10, 'classifier__min_samples_leaf': 5, 'classifier__min_samples_split': 2}	1	quantile-normal	ltsa_lle	decision_tree	0
0.29	0.08	0.42	0	0.42	0	{'classifier__max_depth': 10, 'classifier__min_samples_leaf': 5, 'classifier__min_samples_split': 10}	1	quantile-normal	ltsa_lle	decision_tree	0
0.29	0.08	0.42	0	0.42	0	{'classifier__max_depth': 10, 'classifier__min_samples_leaf': 5, 'classifier__min_samples_split': 20}	1	quantile-normal	ltsa_lle	decision_tree	0
0.29	0.08	0.42	0	0.42	0	{'classifier__max_depth': 10, 'classifier__min_samples_leaf': 10, 'classifier__min_samples_split': 2}	1	quantile-normal	ltsa_lle	decision_tree	0
0.3	0.07	0.42	0	0.42	0	{'classifier__max_depth': 10, 'classifier__min_samples_leaf': 10, 'classifier__min_samples_split': 10}	1	quantile-normal	ltsa_lle	decision_tree	0
0.3	0.08	0.42	0	0.42	0	{'classifier__max_depth': 10, 'classifier__min_samples_leaf': 10, 'classifier__min_samples_split': 20}	1	quantile-normal	ltsa_lle	decision_tree	0
0.29	0.08	0.42	0	0.42	0	{'classifier__max_depth': 20, 'classifier__min_samples_leaf': 1, 'classifier__min_samples_split': 2}	1	quantile-normal	ltsa_lle	decision_tree	0
0.3	0.09	0.42	0	0.42	0	{'classifier__max_depth': 20, 'classifier__min_samples_leaf': 1, 'classifier__min_samples_split': 10}	1	quantile-normal	ltsa_lle	decision_tree	0
0.29	0.09	0.42	0	0.42	0	{'classifier__max_depth': 20, 'classifier__min_samples_leaf': 1, 'classifier__min_samples_split': 20}	1	quantile-normal	ltsa_lle	decision_tree	0
0.3	0.08	0.42	0	0.42	0	{'classifier__max_depth': 20, 'classifier__min_samples_leaf': 5, 'classifier__min_samples_split': 2}	1	quantile-normal	ltsa_lle	decision_tree	0
0.3	0.08	0.42	0	0.42	0	{'classifier__max_depth': 20, 'classifier__min_samples_leaf': 5, 'classifier__min_samples_split': 10}	1	quantile-normal	ltsa_lle	decision_tree	0
0.3	0.08	0.42	0	0.42	0	{'classifier__max_depth': 20, 'classifier__min_samples_leaf': 5, 'classifier__min_samples_split': 20}	1	quantile-normal	ltsa_lle	decision_tree	0
0.3	0.08	0.42	0	0.42	0	{'classifier__max_depth': 20, 'classifier__min_samples_leaf': 10, 'classifier__min_samples_split': 2}	1	quantile-normal	ltsa_lle	decision_tree	0
0.3	0.07	0.42	0	0.42	0	{'classifier__max_depth': 20, 'classifier__min_samples_leaf': 10, 'classifier__min_samples_split': 10}	1	quantile-normal	ltsa_lle	decision_tree	0
0.3	0.07	0.42	0	0.42	0	{'classifier__max_depth': 20, 'classifier__min_samples_leaf': 10, 'classifier__min_samples_split': 20}	1	quantile-normal	ltsa_lle	decision_tree	0
0.25	0.01	0.42	0	0.42	0	{'classifier__C': 0.1, 'classifier__gamma': 'scale'}	2	quantile-uniform	random_projection	svm_sigmoid	0
0.19	0.01	0.42	0	0.42	0	{'classifier__C': 0.1, 'classifier__gamma': 'scale'}	1	quantile-uniform	truncatedsvd	svm_sigmoid	0
0.2	0.01	0.42	0	0.42	0	{'classifier__C': 0.1, 'classifier__gamma': 'auto'}	1	quantile-uniform	truncatedsvd	svm_sigmoid	0
0.25	0.01	0.42	0	0.42	0	{'classifier__C': 1, 'classifier__gamma': 'scale'}	1	quantile-uniform	truncatedsvd	svm_sigmoid	0
0.22	0.01	0.42	0	0.42	0	{'classifier__C': 1, 'classifier__gamma': 'auto'}	1	quantile-uniform	truncatedsvd	svm_sigmoid	0
0.81	0.01	0.42	0	0.42	0	{'classifier__C': 10, 'classifier__gamma': 'auto'}	1	quantile-uniform	truncatedsvd	svm_sigmoid	0
11.38	0.01	0.42	0	0.42	0	{'classifier__max_depth': None, 'classifier__min_samples_leaf': 1, 'classifier__min_samples_split': 2, 'classifier__n_estimators': 50}	1	quantile-uniform	ltsa_lle	random_forest	0
2.02	0.03	0.42	0	0.42	0	{'classifier__max_depth': None, 'classifier__min_samples_leaf': 1, 'classifier__min_samples_split': 2, 'classifier__n_estimators': 100}	1	quantile-uniform	ltsa_lle	random_forest	0
2.43	0.04	0.42	0	0.42	0	{'classifier__max_depth': None, 'classifier__min_samples_leaf': 1, 'classifier__min_samples_split': 2, 'classifier__n_estimators': 200}	1	quantile-uniform	ltsa_lle	random_forest	0
1.9	0.01	0.42	0	0.42	0	{'classifier__max_depth': None, 'classifier__min_samples_leaf': 1, 'classifier__min_samples_split': 10, 'classifier__n_estimators': 50}	1	quantile-uniform	ltsa_lle	random_forest	0
2.98	0.02	0.42	0	0.42	0	{'classifier__max_depth': None, 'classifier__min_samples_leaf': 1, 'classifier__min_samples_split': 10, 'classifier__n_estimators': 100}	1	quantile-uniform	ltsa_lle	random_forest	0
2.77	0.03	0.42	0	0.42	0	{'classifier__max_depth': None, 'classifier__min_samples_leaf': 1, 'classifier__min_samples_split': 10, 'classifier__n_estimators': 200}	1	quantile-uniform	ltsa_lle	random_forest	0
2.29	0.01	0.42	0	0.42	0	{'classifier__max_depth': None, 'classifier__min_samples_leaf': 1, 'classifier__min_samples_split': 20, 'classifier__n_estimators': 50}	1	quantile-uniform	ltsa_lle	random_forest	0
4.08	0.02	0.42	0	0.42	0	{'classifier__max_depth': None, 'classifier__min_samples_leaf': 1, 'classifier__min_samples_split': 20, 'classifier__n_estimators': 100}	1	quantile-uniform	ltsa_lle	random_forest	0
6.29	0.04	0.42	0	0.42	0	{'classifier__max_depth': None, 'classifier__min_samples_leaf': 1, 'classifier__min_samples_split': 20, 'classifier__n_estimators': 200}	1	quantile-uniform	ltsa_lle	random_forest	0
2.35	0.03	0.42	0	0.42	0	{'classifier__max_depth': None, 'classifier__min_samples_leaf': 5, 'classifier__min_samples_split': 2, 'classifier__n_estimators': 50}	1	quantile-uniform	ltsa_lle	random_forest	0
2.87	0.02	0.42	0	0.42	0	{'classifier__max_depth': None, 'classifier__min_samples_leaf': 5, 'classifier__min_samples_split': 2, 'classifier__n_estimators': 100}	1	quantile-uniform	ltsa_lle	random_forest	0
19.16	0.03	0.42	0	0.42	0	{'classifier__max_depth': None, 'classifier__min_samples_leaf': 5, 'classifier__min_samples_split': 2, 'classifier__n_estimators': 200}	1	quantile-uniform	ltsa_lle	random_forest	0
0.95	0.01	0.42	0	0.42	0	{'classifier__max_depth': None, 'classifier__min_samples_leaf': 5, 'classifier__min_samples_split': 10, 'classifier__n_estimators': 50}	1	quantile-uniform	ltsa_lle	random_forest	0
1.49	0.02	0.42	0	0.42	0	{'classifier__max_depth': None, 'classifier__min_samples_leaf': 5, 'classifier__min_samples_split': 10, 'classifier__n_estimators': 100}	1	quantile-uniform	ltsa_lle	random_forest	0
2.81	0.04	0.42	0	0.42	0	{'classifier__max_depth': None, 'classifier__min_samples_leaf': 5, 'classifier__min_samples_split': 10, 'classifier__n_estimators': 200}	1	quantile-uniform	ltsa_lle	random_forest	0
1.44	0.01	0.42	0	0.42	0	{'classifier__max_depth': None, 'classifier__min_samples_leaf': 5, 'classifier__min_samples_split': 20, 'classifier__n_estimators': 50}	1	quantile-uniform	ltsa_lle	random_forest	0
2.82	0.02	0.42	0	0.42	0	{'classifier__max_depth': None, 'classifier__min_samples_leaf': 5, 'classifier__min_samples_split': 20, 'classifier__n_estimators': 100}	1	quantile-uniform	ltsa_lle	random_forest	0
2.36	0.06	0.42	0	0.42	0	{'classifier__max_depth': None, 'classifier__min_samples_leaf': 5, 'classifier__min_samples_split': 20, 'classifier__n_estimators': 200}	1	quantile-uniform	ltsa_lle	random_forest	0
1.3	0.02	0.42	0	0.42	0	{'classifier__max_depth': None, 'classifier__min_samples_leaf': 10, 'classifier__min_samples_split': 2, 'classifier__n_estimators': 50}	1	quantile-uniform	ltsa_lle	random_forest	0
2.64	0.02	0.42	0	0.42	0	{'classifier__max_depth': None, 'classifier__min_samples_leaf': 10, 'classifier__min_samples_split': 2, 'classifier__n_estimators': 100}	1	quantile-uniform	ltsa_lle	random_forest	0
2.92	0.05	0.42	0	0.42	0	{'classifier__max_depth': None, 'classifier__min_samples_leaf': 10, 'classifier__min_samples_split': 2, 'classifier__n_estimators': 200}	1	quantile-uniform	ltsa_lle	random_forest	0
1.67	0.01	0.42	0	0.42	0	{'classifier__max_depth': None, 'classifier__min_samples_leaf': 10, 'classifier__min_samples_split': 10, 'classifier__n_estimators': 50}	1	quantile-uniform	ltsa_lle	random_forest	0
1.88	0.01	0.42	0	0.42	0	{'classifier__max_depth': None, 'classifier__min_samples_leaf': 10, 'classifier__min_samples_split': 10, 'classifier__n_estimators': 100}	1	quantile-uniform	ltsa_lle	random_forest	0
3.05	0.03	0.42	0	0.42	0	{'classifier__max_depth': None, 'classifier__min_samples_leaf': 10, 'classifier__min_samples_split': 10, 'classifier__n_estimators': 200}	1	quantile-uniform	ltsa_lle	random_forest	0
1.63	0.01	0.42	0	0.42	0	{'classifier__max_depth': None, 'classifier__min_samples_leaf': 10, 'classifier__min_samples_split': 20, 'classifier__n_estimators': 50}	1	quantile-uniform	ltsa_lle	random_forest	0
1.91	0.02	0.42	0	0.42	0	{'classifier__max_depth': None, 'classifier__min_samples_leaf': 10, 'classifier__min_samples_split': 20, 'classifier__n_estimators': 100}	1	quantile-uniform	ltsa_lle	random_forest	0
7.31	0.05	0.42	0	0.42	0	{'classifier__max_depth': None, 'classifier__min_samples_leaf': 10, 'classifier__min_samples_split': 20, 'classifier__n_estimators': 200}	1	quantile-uniform	ltsa_lle	random_forest	0
5.14	0.01	0.42	0	0.42	0	{'classifier__max_depth': 10, 'classifier__min_samples_leaf': 1, 'classifier__min_samples_split': 2, 'classifier__n_estimators': 50}	1	quantile-uniform	ltsa_lle	random_forest	0
3.08	0.01	0.42	0	0.42	0	{'classifier__max_depth': 10, 'classifier__min_samples_leaf': 1, 'classifier__min_samples_split': 2, 'classifier__n_estimators': 100}	1	quantile-uniform	ltsa_lle	random_forest	0
2.8	0.04	0.42	0	0.42	0	{'classifier__max_depth': 10, 'classifier__min_samples_leaf': 1, 'classifier__min_samples_split': 2, 'classifier__n_estimators': 200}	1	quantile-uniform	ltsa_lle	random_forest	0
2.93	0.01	0.42	0	0.42	0	{'classifier__max_depth': 10, 'classifier__min_samples_leaf': 1, 'classifier__min_samples_split': 10, 'classifier__n_estimators': 50}	1	quantile-uniform	ltsa_lle	random_forest	0
2.67	0.03	0.42	0	0.42	0	{'classifier__max_depth': 10, 'classifier__min_samples_leaf': 1, 'classifier__min_samples_split': 10, 'classifier__n_estimators': 100}	1	quantile-uniform	ltsa_lle	random_forest	0
1.77	0.04	0.42	0	0.42	0	{'classifier__max_depth': 10, 'classifier__min_samples_leaf': 1, 'classifier__min_samples_split': 10, 'classifier__n_estimators': 200}	1	quantile-uniform	ltsa_lle	random_forest	0
2.2	0.01	0.42	0	0.42	0	{'classifier__max_depth': 10, 'classifier__min_samples_leaf': 1, 'classifier__min_samples_split': 20, 'classifier__n_estimators': 50}	1	quantile-uniform	ltsa_lle	random_forest	0
3.08	0.01	0.42	0	0.42	0	{'classifier__max_depth': 10, 'classifier__min_samples_leaf': 1, 'classifier__min_samples_split': 20, 'classifier__n_estimators': 100}	1	quantile-uniform	ltsa_lle	random_forest	0
3.31	0.03	0.42	0	0.42	0	{'classifier__max_depth': 10, 'classifier__min_samples_leaf': 1, 'classifier__min_samples_split': 20, 'classifier__n_estimators': 200}	1	quantile-uniform	ltsa_lle	random_forest	0
1.77	0.01	0.42	0	0.42	0	{'classifier__max_depth': 10, 'classifier__min_samples_leaf': 5, 'classifier__min_samples_split': 2, 'classifier__n_estimators': 50}	1	quantile-uniform	ltsa_lle	random_forest	0
2.37	0.02	0.42	0	0.42	0	{'classifier__max_depth': 10, 'classifier__min_samples_leaf': 5, 'classifier__min_samples_split': 2, 'classifier__n_estimators': 100}	1	quantile-uniform	ltsa_lle	random_forest	0
1.99	0.03	0.42	0	0.42	0	{'classifier__max_depth': 10, 'classifier__min_samples_leaf': 5, 'classifier__min_samples_split': 2, 'classifier__n_estimators': 200}	1	quantile-uniform	ltsa_lle	random_forest	0
2.69	0.01	0.42	0	0.42	0	{'classifier__max_depth': 10, 'classifier__min_samples_leaf': 5, 'classifier__min_samples_split': 10, 'classifier__n_estimators': 50}	1	quantile-uniform	ltsa_lle	random_forest	0
3.34	0.03	0.42	0	0.42	0	{'classifier__max_depth': 10, 'classifier__min_samples_leaf': 5, 'classifier__min_samples_split': 10, 'classifier__n_estimators': 100}	1	quantile-uniform	ltsa_lle	random_forest	0
11.62	0.03	0.42	0	0.42	0	{'classifier__max_depth': 10, 'classifier__min_samples_leaf': 5, 'classifier__min_samples_split': 10, 'classifier__n_estimators': 200}	1	quantile-uniform	ltsa_lle	random_forest	0
3.1	0.01	0.42	0	0.42	0	{'classifier__max_depth': 10, 'classifier__min_samples_leaf': 5, 'classifier__min_samples_split': 20, 'classifier__n_estimators': 50}	1	quantile-uniform	ltsa_lle	random_forest	0
2.64	0.03	0.42	0	0.42	0	{'classifier__max_depth': 10, 'classifier__min_samples_leaf': 5, 'classifier__min_samples_split': 20, 'classifier__n_estimators': 100}	1	quantile-uniform	ltsa_lle	random_forest	0
2.54	0.07	0.42	0	0.42	0	{'classifier__max_depth': 10, 'classifier__min_samples_leaf': 5, 'classifier__min_samples_split': 20, 'classifier__n_estimators': 200}	1	quantile-uniform	ltsa_lle	random_forest	0
2.05	0.01	0.42	0	0.42	0	{'classifier__max_depth': 10, 'classifier__min_samples_leaf': 10, 'classifier__min_samples_split': 2, 'classifier__n_estimators': 50}	1	quantile-uniform	ltsa_lle	random_forest	0
5.35	0.01	0.42	0	0.42	0	{'classifier__max_depth': 10, 'classifier__min_samples_leaf': 10, 'classifier__min_samples_split': 2, 'classifier__n_estimators': 100}	1	quantile-uniform	ltsa_lle	random_forest	0
4.23	0.03	0.42	0	0.42	0	{'classifier__max_depth': 10, 'classifier__min_samples_leaf': 10, 'classifier__min_samples_split': 2, 'classifier__n_estimators': 200}	1	quantile-uniform	ltsa_lle	random_forest	0
2.11	0.01	0.42	0	0.42	0	{'classifier__max_depth': 10, 'classifier__min_samples_leaf': 10, 'classifier__min_samples_split': 10, 'classifier__n_estimators': 50}	1	quantile-uniform	ltsa_lle	random_forest	0
2.91	0.02	0.42	0	0.42	0	{'classifier__max_depth': 10, 'classifier__min_samples_leaf': 10, 'classifier__min_samples_split': 10, 'classifier__n_estimators': 100}	1	quantile-uniform	ltsa_lle	random_forest	0
2.96	0.03	0.42	0	0.42	0	{'classifier__max_depth': 10, 'classifier__min_samples_leaf': 10, 'classifier__min_samples_split': 10, 'classifier__n_estimators': 200}	1	quantile-uniform	ltsa_lle	random_forest	0
6.86	0.02	0.42	0	0.42	0	{'classifier__max_depth': 10, 'classifier__min_samples_leaf': 10, 'classifier__min_samples_split': 20, 'classifier__n_estimators': 50}	1	quantile-uniform	ltsa_lle	random_forest	0
4.45	0.02	0.42	0	0.42	0	{'classifier__max_depth': 10, 'classifier__min_samples_leaf': 10, 'classifier__min_samples_split': 20, 'classifier__n_estimators': 100}	1	quantile-uniform	ltsa_lle	random_forest	0
3.05	0.04	0.42	0	0.42	0	{'classifier__max_depth': 10, 'classifier__min_samples_leaf': 10, 'classifier__min_samples_split': 20, 'classifier__n_estimators': 200}	1	quantile-uniform	ltsa_lle	random_forest	0
2.13	0.01	0.42	0	0.42	0	{'classifier__max_depth': 20, 'classifier__min_samples_leaf': 1, 'classifier__min_samples_split': 2, 'classifier__n_estimators': 50}	1	quantile-uniform	ltsa_lle	random_forest	0
3.04	0.02	0.42	0	0.42	0	{'classifier__max_depth': 20, 'classifier__min_samples_leaf': 1, 'classifier__min_samples_split': 2, 'classifier__n_estimators': 100}	1	quantile-uniform	ltsa_lle	random_forest	0
5.07	0.03	0.42	0	0.42	0	{'classifier__max_depth': 20, 'classifier__min_samples_leaf': 1, 'classifier__min_samples_split': 2, 'classifier__n_estimators': 200}	1	quantile-uniform	ltsa_lle	random_forest	0
3.5	0.01	0.42	0	0.42	0	{'classifier__max_depth': 20, 'classifier__min_samples_leaf': 1, 'classifier__min_samples_split': 10, 'classifier__n_estimators': 50}	1	quantile-uniform	ltsa_lle	random_forest	0
4.72	0.02	0.42	0	0.42	0	{'classifier__max_depth': 20, 'classifier__min_samples_leaf': 1, 'classifier__min_samples_split': 10, 'classifier__n_estimators': 100}	1	quantile-uniform	ltsa_lle	random_forest	0
4.59	0.04	0.42	0	0.42	0	{'classifier__max_depth': 20, 'classifier__min_samples_leaf': 1, 'classifier__min_samples_split': 10, 'classifier__n_estimators': 200}	1	quantile-uniform	ltsa_lle	random_forest	0
2.93	0.01	0.42	0	0.42	0	{'classifier__max_depth': 20, 'classifier__min_samples_leaf': 1, 'classifier__min_samples_split': 20, 'classifier__n_estimators': 50}	1	quantile-uniform	ltsa_lle	random_forest	0
1.33	0.02	0.42	0	0.42	0	{'classifier__max_depth': 20, 'classifier__min_samples_leaf': 1, 'classifier__min_samples_split': 20, 'classifier__n_estimators': 100}	1	quantile-uniform	ltsa_lle	random_forest	0
3.53	0.04	0.42	0	0.42	0	{'classifier__max_depth': 20, 'classifier__min_samples_leaf': 1, 'classifier__min_samples_split': 20, 'classifier__n_estimators': 200}	1	quantile-uniform	ltsa_lle	random_forest	0
2.97	0.01	0.42	0	0.42	0	{'classifier__max_depth': 20, 'classifier__min_samples_leaf': 5, 'classifier__min_samples_split': 2, 'classifier__n_estimators': 50}	1	quantile-uniform	ltsa_lle	random_forest	0
2.1	0.02	0.42	0	0.42	0	{'classifier__max_depth': 20, 'classifier__min_samples_leaf': 5, 'classifier__min_samples_split': 2, 'classifier__n_estimators': 100}	1	quantile-uniform	ltsa_lle	random_forest	0
2.41	0.04	0.42	0	0.42	0	{'classifier__max_depth': 20, 'classifier__min_samples_leaf': 5, 'classifier__min_samples_split': 2, 'classifier__n_estimators': 200}	1	quantile-uniform	ltsa_lle	random_forest	0
3.38	0.02	0.42	0	0.42	0	{'classifier__max_depth': 20, 'classifier__min_samples_leaf': 5, 'classifier__min_samples_split': 10, 'classifier__n_estimators': 50}	1	quantile-uniform	ltsa_lle	random_forest	0
7.51	0.02	0.42	0	0.42	0	{'classifier__max_depth': 20, 'classifier__min_samples_leaf': 5, 'classifier__min_samples_split': 10, 'classifier__n_estimators': 100}	1	quantile-uniform	ltsa_lle	random_forest	0
1.69	0.03	0.42	0	0.42	0	{'classifier__max_depth': 20, 'classifier__min_samples_leaf': 5, 'classifier__min_samples_split': 10, 'classifier__n_estimators': 200}	1	quantile-uniform	ltsa_lle	random_forest	0
1.93	0.01	0.42	0	0.42	0	{'classifier__max_depth': 20, 'classifier__min_samples_leaf': 5, 'classifier__min_samples_split': 20, 'classifier__n_estimators': 50}	1	quantile-uniform	ltsa_lle	random_forest	0
2.12	0.05	0.42	0	0.42	0	{'classifier__max_depth': 20, 'classifier__min_samples_leaf': 5, 'classifier__min_samples_split': 20, 'classifier__n_estimators': 100}	1	quantile-uniform	ltsa_lle	random_forest	0
2.03	0.04	0.42	0	0.42	0	{'classifier__max_depth': 20, 'classifier__min_samples_leaf': 5, 'classifier__min_samples_split': 20, 'classifier__n_estimators': 200}	1	quantile-uniform	ltsa_lle	random_forest	0
2.14	0.01	0.42	0	0.42	0	{'classifier__max_depth': 20, 'classifier__min_samples_leaf': 10, 'classifier__min_samples_split': 2, 'classifier__n_estimators': 50}	1	quantile-uniform	ltsa_lle	random_forest	0
2.33	0.03	0.42	0	0.42	0	{'classifier__max_depth': 20, 'classifier__min_samples_leaf': 10, 'classifier__min_samples_split': 2, 'classifier__n_estimators': 100}	1	quantile-uniform	ltsa_lle	random_forest	0
2.5	0.07	0.42	0	0.42	0	{'classifier__max_depth': 20, 'classifier__min_samples_leaf': 10, 'classifier__min_samples_split': 2, 'classifier__n_estimators': 200}	1	quantile-uniform	ltsa_lle	random_forest	0
2.57	0.01	0.42	0	0.42	0	{'classifier__max_depth': 20, 'classifier__min_samples_leaf': 10, 'classifier__min_samples_split': 10, 'classifier__n_estimators': 50}	1	quantile-uniform	ltsa_lle	random_forest	0
4.27	0.01	0.42	0	0.42	0	{'classifier__max_depth': 20, 'classifier__min_samples_leaf': 10, 'classifier__min_samples_split': 10, 'classifier__n_estimators': 100}	1	quantile-uniform	ltsa_lle	random_forest	0
12.12	0.04	0.42	0	0.42	0	{'classifier__max_depth': 20, 'classifier__min_samples_leaf': 10, 'classifier__min_samples_split': 10, 'classifier__n_estimators': 200}	1	quantile-uniform	ltsa_lle	random_forest	0
4.47	0.01	0.42	0	0.42	0	{'classifier__max_depth': 20, 'classifier__min_samples_leaf': 10, 'classifier__min_samples_split': 20, 'classifier__n_estimators': 50}	1	quantile-uniform	ltsa_lle	random_forest	0
2.41	0.02	0.42	0	0.42	0	{'classifier__max_depth': 20, 'classifier__min_samples_leaf': 10, 'classifier__min_samples_split': 20, 'classifier__n_estimators': 100}	1	quantile-uniform	ltsa_lle	random_forest	0
2.83	0.07	0.42	0	0.42	0	{'classifier__max_depth': 20, 'classifier__min_samples_leaf': 10, 'classifier__min_samples_split': 20, 'classifier__n_estimators': 200}	1	quantile-uniform	ltsa_lle	random_forest	0
4.6	0.01	0.42	0	0.42	0	{'classifier__max_depth': 5, 'classifier__min_samples_leaf': 1, 'classifier__min_samples_split': 2}	1	quantile-uniform	ltsa_lle	decision_tree	0
3.5	0.01	0.42	0	0.42	0	{'classifier__max_depth': 5, 'classifier__min_samples_leaf': 1, 'classifier__min_samples_split': 10}	1	quantile-uniform	ltsa_lle	decision_tree	0
1.64	0.01	0.42	0	0.42	0	{'classifier__max_depth': 5, 'classifier__min_samples_leaf': 1, 'classifier__min_samples_split': 20}	1	quantile-uniform	ltsa_lle	decision_tree	0
1.19	0.01	0.42	0	0.42	0	{'classifier__max_depth': 5, 'classifier__min_samples_leaf': 5, 'classifier__min_samples_split': 2}	1	quantile-uniform	ltsa_lle	decision_tree	0
2.08	0.01	0.42	0	0.42	0	{'classifier__max_depth': 5, 'classifier__min_samples_leaf': 5, 'classifier__min_samples_split': 10}	1	quantile-uniform	ltsa_lle	decision_tree	0
3.61	0.01	0.42	0	0.42	0	{'classifier__max_depth': 5, 'classifier__min_samples_leaf': 5, 'classifier__min_samples_split': 20}	1	quantile-uniform	ltsa_lle	decision_tree	0
3.63	0.01	0.42	0	0.42	0	{'classifier__max_depth': 5, 'classifier__min_samples_leaf': 10, 'classifier__min_samples_split': 2}	1	quantile-uniform	ltsa_lle	decision_tree	0
6.41	0.01	0.42	0	0.42	0	{'classifier__max_depth': 5, 'classifier__min_samples_leaf': 10, 'classifier__min_samples_split': 10}	1	quantile-uniform	ltsa_lle	decision_tree	0
5.16	0.01	0.42	0	0.42	0	{'classifier__max_depth': 5, 'classifier__min_samples_leaf': 10, 'classifier__min_samples_split': 20}	1	quantile-uniform	ltsa_lle	decision_tree	0
1.41	0.01	0.42	0	0.42	0	{'classifier__max_depth': 10, 'classifier__min_samples_leaf': 1, 'classifier__min_samples_split': 2}	1	quantile-uniform	ltsa_lle	decision_tree	0
1.51	0.01	0.42	0	0.42	0	{'classifier__max_depth': 10, 'classifier__min_samples_leaf': 1, 'classifier__min_samples_split': 10}	1	quantile-uniform	ltsa_lle	decision_tree	0
1.95	0.01	0.42	0	0.42	0	{'classifier__max_depth': 10, 'classifier__min_samples_leaf': 1, 'classifier__min_samples_split': 20}	1	quantile-uniform	ltsa_lle	decision_tree	0
3.36	0.01	0.42	0	0.42	0	{'classifier__max_depth': 10, 'classifier__min_samples_leaf': 5, 'classifier__min_samples_split': 2}	1	quantile-uniform	ltsa_lle	decision_tree	0
1.95	0.01	0.42	0	0.42	0	{'classifier__max_depth': 10, 'classifier__min_samples_leaf': 5, 'classifier__min_samples_split': 10}	1	quantile-uniform	ltsa_lle	decision_tree	0
3.21	0.01	0.42	0	0.42	0	{'classifier__max_depth': 10, 'classifier__min_samples_leaf': 5, 'classifier__min_samples_split': 20}	1	quantile-uniform	ltsa_lle	decision_tree	0
2.01	0.01	0.42	0	0.42	0	{'classifier__max_depth': 10, 'classifier__min_samples_leaf': 10, 'classifier__min_samples_split': 2}	1	quantile-uniform	ltsa_lle	decision_tree	0
3.51	0.01	0.42	0	0.42	0	{'classifier__max_depth': 10, 'classifier__min_samples_leaf': 10, 'classifier__min_samples_split': 10}	1	quantile-uniform	ltsa_lle	decision_tree	0
3.82	0.01	0.42	0	0.42	0	{'classifier__max_depth': 10, 'classifier__min_samples_leaf': 10, 'classifier__min_samples_split': 20}	1	quantile-uniform	ltsa_lle	decision_tree	0
3.74	0.01	0.42	0	0.42	0	{'classifier__max_depth': 20, 'classifier__min_samples_leaf': 1, 'classifier__min_samples_split': 2}	1	quantile-uniform	ltsa_lle	decision_tree	0
3.02	0.01	0.42	0	0.42	0	{'classifier__max_depth': 20, 'classifier__min_samples_leaf': 1, 'classifier__min_samples_split': 10}	1	quantile-uniform	ltsa_lle	decision_tree	0
1.29	0.01	0.42	0	0.42	0	{'classifier__max_depth': 20, 'classifier__min_samples_leaf': 1, 'classifier__min_samples_split': 20}	1	quantile-uniform	ltsa_lle	decision_tree	0
4.17	0.01	0.42	0	0.42	0	{'classifier__max_depth': 20, 'classifier__min_samples_leaf': 5, 'classifier__min_samples_split': 2}	1	quantile-uniform	ltsa_lle	decision_tree	0
9.56	0.01	0.42	0	0.42	0	{'classifier__max_depth': 20, 'classifier__min_samples_leaf': 5, 'classifier__min_samples_split': 10}	1	quantile-uniform	ltsa_lle	decision_tree	0
4.44	0.02	0.42	0	0.42	0	{'classifier__max_depth': 20, 'classifier__min_samples_leaf': 5, 'classifier__min_samples_split': 20}	1	quantile-uniform	ltsa_lle	decision_tree	0
2.66	0.01	0.42	0	0.42	0	{'classifier__max_depth': 20, 'classifier__min_samples_leaf': 10, 'classifier__min_samples_split': 2}	1	quantile-uniform	ltsa_lle	decision_tree	0
4.17	0.01	0.42	0	0.42	0	{'classifier__max_depth': 20, 'classifier__min_samples_leaf': 10, 'classifier__min_samples_split': 10}	1	quantile-uniform	ltsa_lle	decision_tree	0
4.86	0.01	0.42	0	0.42	0	{'classifier__max_depth': 20, 'classifier__min_samples_leaf': 10, 'classifier__min_samples_split': 20}	1	quantile-uniform	ltsa_lle	decision_tree	0
0.07	0	0.42	0	0.42	0	{'classifier__C': 0.1, 'classifier__gamma': 'scale'}	2	yeo-johnson	random_projection	svm_sigmoid	0
0.07	0	0.42	0.01	0.42	0.02	{'classifier__C': 0.1, 'classifier__gamma': 'auto'}	1	yeo-johnson	random_projection	svm_sigmoid	0
0.15	0.01	0.42	0	0.42	0	{'classifier__max_depth': None, 'classifier__min_samples_leaf': 1, 'classifier__min_samples_split': 2, 'classifier__n_estimators': 50}	1	yeo-johnson	ltsa_lle	random_forest	0
0.19	0.01	0.42	0	0.42	0	{'classifier__max_depth': None, 'classifier__min_samples_leaf': 1, 'classifier__min_samples_split': 2, 'classifier__n_estimators': 100}	1	yeo-johnson	ltsa_lle	random_forest	0
0.27	0.01	0.42	0	0.42	0	{'classifier__max_depth': None, 'classifier__min_samples_leaf': 1, 'classifier__min_samples_split': 2, 'classifier__n_estimators': 200}	1	yeo-johnson	ltsa_lle	random_forest	0
0.15	0.01	0.42	0	0.42	0	{'classifier__max_depth': None, 'classifier__min_samples_leaf': 1, 'classifier__min_samples_split': 10, 'classifier__n_estimators': 50}	1	yeo-johnson	ltsa_lle	random_forest	0
0.19	0.01	0.42	0	0.42	0	{'classifier__max_depth': None, 'classifier__min_samples_leaf': 1, 'classifier__min_samples_split': 10, 'classifier__n_estimators': 100}	1	yeo-johnson	ltsa_lle	random_forest	0
0.27	0.01	0.42	0	0.42	0	{'classifier__max_depth': None, 'classifier__min_samples_leaf': 1, 'classifier__min_samples_split': 10, 'classifier__n_estimators': 200}	1	yeo-johnson	ltsa_lle	random_forest	0
0.16	0.01	0.42	0	0.42	0	{'classifier__max_depth': None, 'classifier__min_samples_leaf': 1, 'classifier__min_samples_split': 20, 'classifier__n_estimators': 50}	1	yeo-johnson	ltsa_lle	random_forest	0
0.19	0.01	0.42	0	0.42	0	{'classifier__max_depth': None, 'classifier__min_samples_leaf': 1, 'classifier__min_samples_split': 20, 'classifier__n_estimators': 100}	1	yeo-johnson	ltsa_lle	random_forest	0
0.27	0.01	0.42	0	0.42	0	{'classifier__max_depth': None, 'classifier__min_samples_leaf': 1, 'classifier__min_samples_split': 20, 'classifier__n_estimators': 200}	1	yeo-johnson	ltsa_lle	random_forest	0
0.15	0.01	0.42	0	0.42	0	{'classifier__max_depth': None, 'classifier__min_samples_leaf': 5, 'classifier__min_samples_split': 2, 'classifier__n_estimators': 50}	1	yeo-johnson	ltsa_lle	random_forest	0
0.19	0.01	0.42	0	0.42	0	{'classifier__max_depth': None, 'classifier__min_samples_leaf': 5, 'classifier__min_samples_split': 2, 'classifier__n_estimators': 100}	1	yeo-johnson	ltsa_lle	random_forest	0
0.28	0.01	0.42	0	0.42	0	{'classifier__max_depth': None, 'classifier__min_samples_leaf': 5, 'classifier__min_samples_split': 2, 'classifier__n_estimators': 200}	1	yeo-johnson	ltsa_lle	random_forest	0
0.16	0.01	0.42	0	0.42	0	{'classifier__max_depth': None, 'classifier__min_samples_leaf': 5, 'classifier__min_samples_split': 10, 'classifier__n_estimators': 50}	1	yeo-johnson	ltsa_lle	random_forest	0
0.2	0.01	0.42	0	0.42	0	{'classifier__max_depth': None, 'classifier__min_samples_leaf': 5, 'classifier__min_samples_split': 10, 'classifier__n_estimators': 100}	1	yeo-johnson	ltsa_lle	random_forest	0
0.28	0.01	0.42	0	0.42	0	{'classifier__max_depth': None, 'classifier__min_samples_leaf': 5, 'classifier__min_samples_split': 10, 'classifier__n_estimators': 200}	1	yeo-johnson	ltsa_lle	random_forest	0
0.18	0.01	0.42	0	0.42	0	{'classifier__max_depth': None, 'classifier__min_samples_leaf': 5, 'classifier__min_samples_split': 20, 'classifier__n_estimators': 50}	1	yeo-johnson	ltsa_lle	random_forest	0
0.24	0.01	0.42	0	0.42	0	{'classifier__max_depth': None, 'classifier__min_samples_leaf': 5, 'classifier__min_samples_split': 20, 'classifier__n_estimators': 100}	1	yeo-johnson	ltsa_lle	random_forest	0
0.32	0.01	0.42	0	0.42	0	{'classifier__max_depth': None, 'classifier__min_samples_leaf': 5, 'classifier__min_samples_split': 20, 'classifier__n_estimators': 200}	1	yeo-johnson	ltsa_lle	random_forest	0
0.18	0.01	0.42	0	0.42	0	{'classifier__max_depth': None, 'classifier__min_samples_leaf': 10, 'classifier__min_samples_split': 2, 'classifier__n_estimators': 50}	1	yeo-johnson	ltsa_lle	random_forest	0
0.22	0.01	0.42	0	0.42	0	{'classifier__max_depth': None, 'classifier__min_samples_leaf': 10, 'classifier__min_samples_split': 2, 'classifier__n_estimators': 100}	1	yeo-johnson	ltsa_lle	random_forest	0
0.32	0.01	0.42	0	0.42	0	{'classifier__max_depth': None, 'classifier__min_samples_leaf': 10, 'classifier__min_samples_split': 2, 'classifier__n_estimators': 200}	1	yeo-johnson	ltsa_lle	random_forest	0
0.19	0.01	0.42	0	0.42	0	{'classifier__max_depth': None, 'classifier__min_samples_leaf': 10, 'classifier__min_samples_split': 10, 'classifier__n_estimators': 50}	1	yeo-johnson	ltsa_lle	random_forest	0
0.23	0.01	0.42	0	0.42	0	{'classifier__max_depth': None, 'classifier__min_samples_leaf': 10, 'classifier__min_samples_split': 10, 'classifier__n_estimators': 100}	1	yeo-johnson	ltsa_lle	random_forest	0
0.32	0.01	0.42	0	0.42	0	{'classifier__max_depth': None, 'classifier__min_samples_leaf': 10, 'classifier__min_samples_split': 10, 'classifier__n_estimators': 200}	1	yeo-johnson	ltsa_lle	random_forest	0
0.18	0.01	0.42	0	0.42	0	{'classifier__max_depth': None, 'classifier__min_samples_leaf': 10, 'classifier__min_samples_split': 20, 'classifier__n_estimators': 50}	1	yeo-johnson	ltsa_lle	random_forest	0
0.23	0.01	0.42	0	0.42	0	{'classifier__max_depth': None, 'classifier__min_samples_leaf': 10, 'classifier__min_samples_split': 20, 'classifier__n_estimators': 100}	1	yeo-johnson	ltsa_lle	random_forest	0
0.33	0.01	0.42	0	0.42	0	{'classifier__max_depth': None, 'classifier__min_samples_leaf': 10, 'classifier__min_samples_split': 20, 'classifier__n_estimators': 200}	1	yeo-johnson	ltsa_lle	random_forest	0
0.18	0.01	0.42	0	0.42	0	{'classifier__max_depth': 10, 'classifier__min_samples_leaf': 1, 'classifier__min_samples_split': 2, 'classifier__n_estimators': 50}	1	yeo-johnson	ltsa_lle	random_forest	0
0.23	0.01	0.42	0	0.42	0	{'classifier__max_depth': 10, 'classifier__min_samples_leaf': 1, 'classifier__min_samples_split': 2, 'classifier__n_estimators': 100}	1	yeo-johnson	ltsa_lle	random_forest	0
0.32	0.02	0.42	0	0.42	0	{'classifier__max_depth': 10, 'classifier__min_samples_leaf': 1, 'classifier__min_samples_split': 2, 'classifier__n_estimators': 200}	1	yeo-johnson	ltsa_lle	random_forest	0
0.18	0.01	0.42	0	0.42	0	{'classifier__max_depth': 10, 'classifier__min_samples_leaf': 1, 'classifier__min_samples_split': 10, 'classifier__n_estimators': 50}	1	yeo-johnson	ltsa_lle	random_forest	0
0.23	0.01	0.42	0	0.42	0	{'classifier__max_depth': 10, 'classifier__min_samples_leaf': 1, 'classifier__min_samples_split': 10, 'classifier__n_estimators': 100}	1	yeo-johnson	ltsa_lle	random_forest	0
0.32	0.01	0.42	0	0.42	0	{'classifier__max_depth': 10, 'classifier__min_samples_leaf': 1, 'classifier__min_samples_split': 10, 'classifier__n_estimators': 200}	1	yeo-johnson	ltsa_lle	random_forest	0
0.18	0.01	0.42	0	0.42	0	{'classifier__max_depth': 10, 'classifier__min_samples_leaf': 1, 'classifier__min_samples_split': 20, 'classifier__n_estimators': 50}	1	yeo-johnson	ltsa_lle	random_forest	0
0.24	0.01	0.42	0	0.42	0	{'classifier__max_depth': 10, 'classifier__min_samples_leaf': 1, 'classifier__min_samples_split': 20, 'classifier__n_estimators': 100}	1	yeo-johnson	ltsa_lle	random_forest	0
0.31	0.01	0.42	0	0.42	0	{'classifier__max_depth': 10, 'classifier__min_samples_leaf': 1, 'classifier__min_samples_split': 20, 'classifier__n_estimators': 200}	1	yeo-johnson	ltsa_lle	random_forest	0
0.18	0.01	0.42	0	0.42	0	{'classifier__max_depth': 10, 'classifier__min_samples_leaf': 5, 'classifier__min_samples_split': 2, 'classifier__n_estimators': 50}	1	yeo-johnson	ltsa_lle	random_forest	0
0.24	0.01	0.42	0	0.42	0	{'classifier__max_depth': 10, 'classifier__min_samples_leaf': 5, 'classifier__min_samples_split': 2, 'classifier__n_estimators': 100}	1	yeo-johnson	ltsa_lle	random_forest	0
0.32	0.01	0.42	0	0.42	0	{'classifier__max_depth': 10, 'classifier__min_samples_leaf': 5, 'classifier__min_samples_split': 2, 'classifier__n_estimators': 200}	1	yeo-johnson	ltsa_lle	random_forest	0
0.18	0.01	0.42	0	0.42	0	{'classifier__max_depth': 10, 'classifier__min_samples_leaf': 5, 'classifier__min_samples_split': 10, 'classifier__n_estimators': 50}	1	yeo-johnson	ltsa_lle	random_forest	0
0.23	0.01	0.42	0	0.42	0	{'classifier__max_depth': 10, 'classifier__min_samples_leaf': 5, 'classifier__min_samples_split': 10, 'classifier__n_estimators': 100}	1	yeo-johnson	ltsa_lle	random_forest	0
0.32	0.01	0.42	0	0.42	0	{'classifier__max_depth': 10, 'classifier__min_samples_leaf': 5, 'classifier__min_samples_split': 10, 'classifier__n_estimators': 200}	1	yeo-johnson	ltsa_lle	random_forest	0
0.19	0.01	0.42	0	0.42	0	{'classifier__max_depth': 10, 'classifier__min_samples_leaf': 5, 'classifier__min_samples_split': 20, 'classifier__n_estimators': 50}	1	yeo-johnson	ltsa_lle	random_forest	0
0.22	0.01	0.42	0	0.42	0	{'classifier__max_depth': 10, 'classifier__min_samples_leaf': 5, 'classifier__min_samples_split': 20, 'classifier__n_estimators': 100}	1	yeo-johnson	ltsa_lle	random_forest	0
0.32	0.01	0.42	0	0.42	0	{'classifier__max_depth': 10, 'classifier__min_samples_leaf': 5, 'classifier__min_samples_split': 20, 'classifier__n_estimators': 200}	1	yeo-johnson	ltsa_lle	random_forest	0
0.2	0.01	0.42	0	0.42	0	{'classifier__max_depth': 10, 'classifier__min_samples_leaf': 10, 'classifier__min_samples_split': 2, 'classifier__n_estimators': 50}	1	yeo-johnson	ltsa_lle	random_forest	0
0.22	0.01	0.42	0	0.42	0	{'classifier__max_depth': 10, 'classifier__min_samples_leaf': 10, 'classifier__min_samples_split': 2, 'classifier__n_estimators': 100}	1	yeo-johnson	ltsa_lle	random_forest	0
0.32	0.01	0.42	0	0.42	0	{'classifier__max_depth': 10, 'classifier__min_samples_leaf': 10, 'classifier__min_samples_split': 2, 'classifier__n_estimators': 200}	1	yeo-johnson	ltsa_lle	random_forest	0
0.18	0.01	0.42	0	0.42	0	{'classifier__max_depth': 10, 'classifier__min_samples_leaf': 10, 'classifier__min_samples_split': 10, 'classifier__n_estimators': 50}	1	yeo-johnson	ltsa_lle	random_forest	0
0.23	0.01	0.42	0	0.42	0	{'classifier__max_depth': 10, 'classifier__min_samples_leaf': 10, 'classifier__min_samples_split': 10, 'classifier__n_estimators': 100}	1	yeo-johnson	ltsa_lle	random_forest	0
0.33	0.01	0.42	0	0.42	0	{'classifier__max_depth': 10, 'classifier__min_samples_leaf': 10, 'classifier__min_samples_split': 10, 'classifier__n_estimators': 200}	1	yeo-johnson	ltsa_lle	random_forest	0
0.18	0.01	0.42	0	0.42	0	{'classifier__max_depth': 10, 'classifier__min_samples_leaf': 10, 'classifier__min_samples_split': 20, 'classifier__n_estimators': 50}	1	yeo-johnson	ltsa_lle	random_forest	0
0.23	0.01	0.42	0	0.42	0	{'classifier__max_depth': 10, 'classifier__min_samples_leaf': 10, 'classifier__min_samples_split': 20, 'classifier__n_estimators': 100}	1	yeo-johnson	ltsa_lle	random_forest	0
0.32	0.01	0.42	0	0.42	0	{'classifier__max_depth': 10, 'classifier__min_samples_leaf': 10, 'classifier__min_samples_split': 20, 'classifier__n_estimators': 200}	1	yeo-johnson	ltsa_lle	random_forest	0
0.19	0.01	0.42	0	0.42	0	{'classifier__max_depth': 20, 'classifier__min_samples_leaf': 1, 'classifier__min_samples_split': 2, 'classifier__n_estimators': 50}	1	yeo-johnson	ltsa_lle	random_forest	0
0.22	0.01	0.42	0	0.42	0	{'classifier__max_depth': 20, 'classifier__min_samples_leaf': 1, 'classifier__min_samples_split': 2, 'classifier__n_estimators': 100}	1	yeo-johnson	ltsa_lle	random_forest	0
0.33	0.01	0.42	0	0.42	0	{'classifier__max_depth': 20, 'classifier__min_samples_leaf': 1, 'classifier__min_samples_split': 2, 'classifier__n_estimators': 200}	1	yeo-johnson	ltsa_lle	random_forest	0
0.19	0.01	0.42	0	0.42	0	{'classifier__max_depth': 20, 'classifier__min_samples_leaf': 1, 'classifier__min_samples_split': 10, 'classifier__n_estimators': 50}	1	yeo-johnson	ltsa_lle	random_forest	0
0.23	0.01	0.42	0	0.42	0	{'classifier__max_depth': 20, 'classifier__min_samples_leaf': 1, 'classifier__min_samples_split': 10, 'classifier__n_estimators': 100}	1	yeo-johnson	ltsa_lle	random_forest	0
0.32	0.01	0.42	0	0.42	0	{'classifier__max_depth': 20, 'classifier__min_samples_leaf': 1, 'classifier__min_samples_split': 10, 'classifier__n_estimators': 200}	1	yeo-johnson	ltsa_lle	random_forest	0
0.19	0.01	0.42	0	0.42	0	{'classifier__max_depth': 20, 'classifier__min_samples_leaf': 1, 'classifier__min_samples_split': 20, 'classifier__n_estimators': 50}	1	yeo-johnson	ltsa_lle	random_forest	0
0.23	0.01	0.42	0	0.42	0	{'classifier__max_depth': 20, 'classifier__min_samples_leaf': 1, 'classifier__min_samples_split': 20, 'classifier__n_estimators': 100}	1	yeo-johnson	ltsa_lle	random_forest	0
0.33	0.01	0.42	0	0.42	0	{'classifier__max_depth': 20, 'classifier__min_samples_leaf': 1, 'classifier__min_samples_split': 20, 'classifier__n_estimators': 200}	1	yeo-johnson	ltsa_lle	random_forest	0
0.18	0.01	0.42	0	0.42	0	{'classifier__max_depth': 20, 'classifier__min_samples_leaf': 5, 'classifier__min_samples_split': 2, 'classifier__n_estimators': 50}	1	yeo-johnson	ltsa_lle	random_forest	0
0.23	0.01	0.42	0	0.42	0	{'classifier__max_depth': 20, 'classifier__min_samples_leaf': 5, 'classifier__min_samples_split': 2, 'classifier__n_estimators': 100}	1	yeo-johnson	ltsa_lle	random_forest	0
0.45	0.02	0.42	0	0.42	0	{'classifier__max_depth': 20, 'classifier__min_samples_leaf': 5, 'classifier__min_samples_split': 2, 'classifier__n_estimators': 200}	1	yeo-johnson	ltsa_lle	random_forest	0
0.28	0.01	0.42	0	0.42	0	{'classifier__max_depth': 20, 'classifier__min_samples_leaf': 5, 'classifier__min_samples_split': 10, 'classifier__n_estimators': 50}	1	yeo-johnson	ltsa_lle	random_forest	0
0.25	0.01	0.42	0	0.42	0	{'classifier__max_depth': 20, 'classifier__min_samples_leaf': 5, 'classifier__min_samples_split': 10, 'classifier__n_estimators': 100}	1	yeo-johnson	ltsa_lle	random_forest	0
0.35	0.01	0.42	0	0.42	0	{'classifier__max_depth': 20, 'classifier__min_samples_leaf': 5, 'classifier__min_samples_split': 10, 'classifier__n_estimators': 200}	1	yeo-johnson	ltsa_lle	random_forest	0
0.2	0.01	0.42	0	0.42	0	{'classifier__max_depth': 20, 'classifier__min_samples_leaf': 5, 'classifier__min_samples_split': 20, 'classifier__n_estimators': 50}	1	yeo-johnson	ltsa_lle	random_forest	0
0.26	0.01	0.42	0	0.42	0	{'classifier__max_depth': 20, 'classifier__min_samples_leaf': 5, 'classifier__min_samples_split': 20, 'classifier__n_estimators': 100}	1	yeo-johnson	ltsa_lle	random_forest	0
0.35	0.01	0.42	0	0.42	0	{'classifier__max_depth': 20, 'classifier__min_samples_leaf': 5, 'classifier__min_samples_split': 20, 'classifier__n_estimators': 200}	1	yeo-johnson	ltsa_lle	random_forest	0
0.2	0.01	0.42	0	0.42	0	{'classifier__max_depth': 20, 'classifier__min_samples_leaf': 10, 'classifier__min_samples_split': 2, 'classifier__n_estimators': 50}	1	yeo-johnson	ltsa_lle	random_forest	0
0.24	0.01	0.42	0	0.42	0	{'classifier__max_depth': 20, 'classifier__min_samples_leaf': 10, 'classifier__min_samples_split': 2, 'classifier__n_estimators': 100}	1	yeo-johnson	ltsa_lle	random_forest	0
0.34	0.02	0.42	0	0.42	0	{'classifier__max_depth': 20, 'classifier__min_samples_leaf': 10, 'classifier__min_samples_split': 2, 'classifier__n_estimators': 200}	1	yeo-johnson	ltsa_lle	random_forest	0
0.18	0.01	0.42	0	0.42	0	{'classifier__max_depth': 20, 'classifier__min_samples_leaf': 10, 'classifier__min_samples_split': 10, 'classifier__n_estimators': 50}	1	yeo-johnson	ltsa_lle	random_forest	0
0.24	0.01	0.42	0	0.42	0	{'classifier__max_depth': 20, 'classifier__min_samples_leaf': 10, 'classifier__min_samples_split': 10, 'classifier__n_estimators': 100}	1	yeo-johnson	ltsa_lle	random_forest	0
0.33	0.02	0.42	0	0.42	0	{'classifier__max_depth': 20, 'classifier__min_samples_leaf': 10, 'classifier__min_samples_split': 10, 'classifier__n_estimators': 200}	1	yeo-johnson	ltsa_lle	random_forest	0
0.2	0.01	0.42	0	0.42	0	{'classifier__max_depth': 20, 'classifier__min_samples_leaf': 10, 'classifier__min_samples_split': 20, 'classifier__n_estimators': 50}	1	yeo-johnson	ltsa_lle	random_forest	0
0.23	0.01	0.42	0	0.42	0	{'classifier__max_depth': 20, 'classifier__min_samples_leaf': 10, 'classifier__min_samples_split': 20, 'classifier__n_estimators': 100}	1	yeo-johnson	ltsa_lle	random_forest	0
0.31	0.01	0.42	0	0.42	0	{'classifier__max_depth': 20, 'classifier__min_samples_leaf': 10, 'classifier__min_samples_split': 20, 'classifier__n_estimators': 200}	1	yeo-johnson	ltsa_lle	random_forest	0
0.13	0.01	0.42	0	0.42	0	{'classifier__max_depth': 5, 'classifier__min_samples_leaf': 1, 'classifier__min_samples_split': 2}	1	yeo-johnson	ltsa_lle	decision_tree	0
0.14	0.01	0.42	0	0.42	0	{'classifier__max_depth': 5, 'classifier__min_samples_leaf': 1, 'classifier__min_samples_split': 10}	1	yeo-johnson	ltsa_lle	decision_tree	0
0.14	0.01	0.42	0	0.42	0	{'classifier__max_depth': 5, 'classifier__min_samples_leaf': 1, 'classifier__min_samples_split': 20}	1	yeo-johnson	ltsa_lle	decision_tree	0
0.13	0.01	0.42	0	0.42	0	{'classifier__max_depth': 5, 'classifier__min_samples_leaf': 5, 'classifier__min_samples_split': 2}	1	yeo-johnson	ltsa_lle	decision_tree	0
0.12	0.01	0.42	0	0.42	0	{'classifier__max_depth': 5, 'classifier__min_samples_leaf': 5, 'classifier__min_samples_split': 10}	1	yeo-johnson	ltsa_lle	decision_tree	0
0.12	0.01	0.42	0	0.42	0	{'classifier__max_depth': 5, 'classifier__min_samples_leaf': 5, 'classifier__min_samples_split': 20}	1	yeo-johnson	ltsa_lle	decision_tree	0
0.12	0.01	0.42	0	0.42	0	{'classifier__max_depth': 5, 'classifier__min_samples_leaf': 10, 'classifier__min_samples_split': 2}	1	yeo-johnson	ltsa_lle	decision_tree	0
0.12	0.01	0.42	0	0.42	0	{'classifier__max_depth': 5, 'classifier__min_samples_leaf': 10, 'classifier__min_samples_split': 10}	1	yeo-johnson	ltsa_lle	decision_tree	0
0.12	0.01	0.42	0	0.42	0	{'classifier__max_depth': 5, 'classifier__min_samples_leaf': 10, 'classifier__min_samples_split': 20}	1	yeo-johnson	ltsa_lle	decision_tree	0
0.12	0.01	0.42	0	0.42	0	{'classifier__max_depth': 10, 'classifier__min_samples_leaf': 1, 'classifier__min_samples_split': 2}	1	yeo-johnson	ltsa_lle	decision_tree	0
0.12	0.01	0.42	0	0.42	0	{'classifier__max_depth': 10, 'classifier__min_samples_leaf': 1, 'classifier__min_samples_split': 10}	1	yeo-johnson	ltsa_lle	decision_tree	0
0.12	0.01	0.42	0	0.42	0	{'classifier__max_depth': 10, 'classifier__min_samples_leaf': 1, 'classifier__min_samples_split': 20}	1	yeo-johnson	ltsa_lle	decision_tree	0
0.12	0.01	0.42	0	0.42	0	{'classifier__max_depth': 10, 'classifier__min_samples_leaf': 5, 'classifier__min_samples_split': 2}	1	yeo-johnson	ltsa_lle	decision_tree	0
0.12	0.01	0.42	0	0.42	0	{'classifier__max_depth': 10, 'classifier__min_samples_leaf': 5, 'classifier__min_samples_split': 10}	1	yeo-johnson	ltsa_lle	decision_tree	0
0.19	0.01	0.42	0	0.42	0	{'classifier__max_depth': 10, 'classifier__min_samples_leaf': 5, 'classifier__min_samples_split': 20}	1	yeo-johnson	ltsa_lle	decision_tree	0
0.16	0.01	0.42	0	0.42	0	{'classifier__max_depth': 10, 'classifier__min_samples_leaf': 10, 'classifier__min_samples_split': 2}	1	yeo-johnson	ltsa_lle	decision_tree	0
0.12	0.01	0.42	0	0.42	0	{'classifier__max_depth': 10, 'classifier__min_samples_leaf': 10, 'classifier__min_samples_split': 10}	1	yeo-johnson	ltsa_lle	decision_tree	0
0.12	0.01	0.42	0	0.42	0	{'classifier__max_depth': 10, 'classifier__min_samples_leaf': 10, 'classifier__min_samples_split': 20}	1	yeo-johnson	ltsa_lle	decision_tree	0
0.13	0.01	0.42	0	0.42	0	{'classifier__max_depth': 20, 'classifier__min_samples_leaf': 1, 'classifier__min_samples_split': 2}	1	yeo-johnson	ltsa_lle	decision_tree	0
0.14	0.01	0.42	0	0.42	0	{'classifier__max_depth': 20, 'classifier__min_samples_leaf': 1, 'classifier__min_samples_split': 10}	1	yeo-johnson	ltsa_lle	decision_tree	0
0.13	0.01	0.42	0	0.42	0	{'classifier__max_depth': 20, 'classifier__min_samples_leaf': 1, 'classifier__min_samples_split': 20}	1	yeo-johnson	ltsa_lle	decision_tree	0
0.13	0.01	0.42	0	0.42	0	{'classifier__max_depth': 20, 'classifier__min_samples_leaf': 5, 'classifier__min_samples_split': 2}	1	yeo-johnson	ltsa_lle	decision_tree	0
0.13	0.01	0.42	0	0.42	0	{'classifier__max_depth': 20, 'classifier__min_samples_leaf': 5, 'classifier__min_samples_split': 10}	1	yeo-johnson	ltsa_lle	decision_tree	0
0.13	0.01	0.42	0	0.42	0	{'classifier__max_depth': 20, 'classifier__min_samples_leaf': 5, 'classifier__min_samples_split': 20}	1	yeo-johnson	ltsa_lle	decision_tree	0
0.12	0.01	0.42	0	0.42	0	{'classifier__max_depth': 20, 'classifier__min_samples_leaf': 10, 'classifier__min_samples_split': 2}	1	yeo-johnson	ltsa_lle	decision_tree	0
0.12	0.01	0.42	0	0.42	0	{'classifier__max_depth': 20, 'classifier__min_samples_leaf': 10, 'classifier__min_samples_split': 10}	1	yeo-johnson	ltsa_lle	decision_tree	0
0.11	0.01	0.42	0	0.42	0	{'classifier__max_depth': 20, 'classifier__min_samples_leaf': 10, 'classifier__min_samples_split': 20}	1	yeo-johnson	ltsa_lle	decision_tree	0
0.11	0.02	0.42	0	0.42	0	{'classifier__max_depth': None, 'classifier__min_samples_leaf': 1, 'classifier__min_samples_split': 2, 'classifier__n_estimators': 50}	1	quantile-normal	ltsa_lle	random_forest	0
0.15	0.02	0.42	0	0.42	0	{'classifier__max_depth': None, 'classifier__min_samples_leaf': 1, 'classifier__min_samples_split': 2, 'classifier__n_estimators': 100}	1	quantile-normal	ltsa_lle	random_forest	0
0.22	0.03	0.42	0	0.42	0	{'classifier__max_depth': None, 'classifier__min_samples_leaf': 1, 'classifier__min_samples_split': 2, 'classifier__n_estimators': 200}	1	quantile-normal	ltsa_lle	random_forest	0
0.12	0.02	0.42	0	0.42	0	{'classifier__max_depth': None, 'classifier__min_samples_leaf': 1, 'classifier__min_samples_split': 10, 'classifier__n_estimators': 50}	1	quantile-normal	ltsa_lle	random_forest	0
0.15	0.02	0.42	0	0.42	0	{'classifier__max_depth': None, 'classifier__min_samples_leaf': 1, 'classifier__min_samples_split': 10, 'classifier__n_estimators': 100}	1	quantile-normal	ltsa_lle	random_forest	0
0.22	0.03	0.42	0	0.42	0	{'classifier__max_depth': None, 'classifier__min_samples_leaf': 1, 'classifier__min_samples_split': 10, 'classifier__n_estimators': 200}	1	quantile-normal	ltsa_lle	random_forest	0
0.12	0.02	0.42	0	0.42	0	{'classifier__max_depth': None, 'classifier__min_samples_leaf': 1, 'classifier__min_samples_split': 20, 'classifier__n_estimators': 50}	1	quantile-normal	ltsa_lle	random_forest	0
0.15	0.02	0.42	0	0.42	0	{'classifier__max_depth': None, 'classifier__min_samples_leaf': 1, 'classifier__min_samples_split': 20, 'classifier__n_estimators': 100}	1	quantile-normal	ltsa_lle	random_forest	0
0.22	0.03	0.42	0	0.42	0	{'classifier__max_depth': None, 'classifier__min_samples_leaf': 1, 'classifier__min_samples_split': 20, 'classifier__n_estimators': 200}	1	quantile-normal	ltsa_lle	random_forest	0
0.12	0.02	0.42	0	0.42	0	{'classifier__max_depth': None, 'classifier__min_samples_leaf': 5, 'classifier__min_samples_split': 2, 'classifier__n_estimators': 50}	1	quantile-normal	ltsa_lle	random_forest	0
0.15	0.02	0.42	0	0.42	0	{'classifier__max_depth': None, 'classifier__min_samples_leaf': 5, 'classifier__min_samples_split': 2, 'classifier__n_estimators': 100}	1	quantile-normal	ltsa_lle	random_forest	0
0.22	0.03	0.42	0	0.42	0	{'classifier__max_depth': None, 'classifier__min_samples_leaf': 5, 'classifier__min_samples_split': 2, 'classifier__n_estimators': 200}	1	quantile-normal	ltsa_lle	random_forest	0
0.12	0.02	0.42	0	0.42	0	{'classifier__max_depth': None, 'classifier__min_samples_leaf': 5, 'classifier__min_samples_split': 10, 'classifier__n_estimators': 50}	1	quantile-normal	ltsa_lle	random_forest	0
0.15	0.02	0.42	0	0.42	0	{'classifier__max_depth': None, 'classifier__min_samples_leaf': 5, 'classifier__min_samples_split': 10, 'classifier__n_estimators': 100}	1	quantile-normal	ltsa_lle	random_forest	0
0.22	0.02	0.42	0	0.42	0	{'classifier__max_depth': None, 'classifier__min_samples_leaf': 5, 'classifier__min_samples_split': 10, 'classifier__n_estimators': 200}	1	quantile-normal	ltsa_lle	random_forest	0
0.12	0.02	0.42	0	0.42	0	{'classifier__max_depth': None, 'classifier__min_samples_leaf': 5, 'classifier__min_samples_split': 20, 'classifier__n_estimators': 50}	1	quantile-normal	ltsa_lle	random_forest	0
0.16	0.02	0.42	0	0.42	0	{'classifier__max_depth': None, 'classifier__min_samples_leaf': 5, 'classifier__min_samples_split': 20, 'classifier__n_estimators': 100}	1	quantile-normal	ltsa_lle	random_forest	0
0.22	0.02	0.42	0	0.42	0	{'classifier__max_depth': None, 'classifier__min_samples_leaf': 5, 'classifier__min_samples_split': 20, 'classifier__n_estimators': 200}	1	quantile-normal	ltsa_lle	random_forest	0
0.12	0.02	0.42	0	0.42	0	{'classifier__max_depth': None, 'classifier__min_samples_leaf': 10, 'classifier__min_samples_split': 2, 'classifier__n_estimators': 50}	1	quantile-normal	ltsa_lle	random_forest	0
0.16	0.02	0.42	0	0.42	0	{'classifier__max_depth': None, 'classifier__min_samples_leaf': 10, 'classifier__min_samples_split': 2, 'classifier__n_estimators': 100}	1	quantile-normal	ltsa_lle	random_forest	0
0.22	0.03	0.42	0	0.42	0	{'classifier__max_depth': None, 'classifier__min_samples_leaf': 10, 'classifier__min_samples_split': 2, 'classifier__n_estimators': 200}	1	quantile-normal	ltsa_lle	random_forest	0
0.12	0.02	0.42	0	0.42	0	{'classifier__max_depth': None, 'classifier__min_samples_leaf': 10, 'classifier__min_samples_split': 10, 'classifier__n_estimators': 50}	1	quantile-normal	ltsa_lle	random_forest	0
0.16	0.02	0.42	0	0.42	0	{'classifier__max_depth': None, 'classifier__min_samples_leaf': 10, 'classifier__min_samples_split': 10, 'classifier__n_estimators': 100}	1	quantile-normal	ltsa_lle	random_forest	0
0.22	0.02	0.42	0	0.42	0	{'classifier__max_depth': None, 'classifier__min_samples_leaf': 10, 'classifier__min_samples_split': 10, 'classifier__n_estimators': 200}	1	quantile-normal	ltsa_lle	random_forest	0
0.12	0.02	0.42	0	0.42	0	{'classifier__max_depth': None, 'classifier__min_samples_leaf': 10, 'classifier__min_samples_split': 20, 'classifier__n_estimators': 50}	1	quantile-normal	ltsa_lle	random_forest	0
0.15	0.02	0.42	0	0.42	0	{'classifier__max_depth': None, 'classifier__min_samples_leaf': 10, 'classifier__min_samples_split': 20, 'classifier__n_estimators': 100}	1	quantile-normal	ltsa_lle	random_forest	0
0.22	0.02	0.42	0	0.42	0	{'classifier__max_depth': None, 'classifier__min_samples_leaf': 10, 'classifier__min_samples_split': 20, 'classifier__n_estimators': 200}	1	quantile-normal	ltsa_lle	random_forest	0
0.12	0.02	0.42	0	0.42	0	{'classifier__max_depth': 10, 'classifier__min_samples_leaf': 1, 'classifier__min_samples_split': 2, 'classifier__n_estimators': 50}	1	quantile-normal	ltsa_lle	random_forest	0
0.15	0.02	0.42	0	0.42	0	{'classifier__max_depth': 10, 'classifier__min_samples_leaf': 1, 'classifier__min_samples_split': 2, 'classifier__n_estimators': 100}	1	quantile-normal	ltsa_lle	random_forest	0
0.23	0.03	0.42	0	0.42	0	{'classifier__max_depth': 10, 'classifier__min_samples_leaf': 1, 'classifier__min_samples_split': 2, 'classifier__n_estimators': 200}	1	quantile-normal	ltsa_lle	random_forest	0
0.12	0.02	0.42	0	0.42	0	{'classifier__max_depth': 10, 'classifier__min_samples_leaf': 1, 'classifier__min_samples_split': 10, 'classifier__n_estimators': 50}	1	quantile-normal	ltsa_lle	random_forest	0
0.15	0.02	0.42	0	0.42	0	{'classifier__max_depth': 10, 'classifier__min_samples_leaf': 1, 'classifier__min_samples_split': 10, 'classifier__n_estimators': 100}	1	quantile-normal	ltsa_lle	random_forest	0
0.23	0.03	0.42	0	0.42	0	{'classifier__max_depth': 10, 'classifier__min_samples_leaf': 1, 'classifier__min_samples_split': 10, 'classifier__n_estimators': 200}	1	quantile-normal	ltsa_lle	random_forest	0
0.12	0.02	0.42	0	0.42	0	{'classifier__max_depth': 10, 'classifier__min_samples_leaf': 1, 'classifier__min_samples_split': 20, 'classifier__n_estimators': 50}	1	quantile-normal	ltsa_lle	random_forest	0
0.15	0.02	0.42	0	0.42	0	{'classifier__max_depth': 10, 'classifier__min_samples_leaf': 1, 'classifier__min_samples_split': 20, 'classifier__n_estimators': 100}	1	quantile-normal	ltsa_lle	random_forest	0
0.22	0.03	0.42	0	0.42	0	{'classifier__max_depth': 10, 'classifier__min_samples_leaf': 1, 'classifier__min_samples_split': 20, 'classifier__n_estimators': 200}	1	quantile-normal	ltsa_lle	random_forest	0
0.12	0.02	0.42	0	0.42	0	{'classifier__max_depth': 10, 'classifier__min_samples_leaf': 5, 'classifier__min_samples_split': 2, 'classifier__n_estimators': 50}	1	quantile-normal	ltsa_lle	random_forest	0
0.15	0.02	0.42	0	0.42	0	{'classifier__max_depth': 10, 'classifier__min_samples_leaf': 5, 'classifier__min_samples_split': 2, 'classifier__n_estimators': 100}	1	quantile-normal	ltsa_lle	random_forest	0
0.22	0.03	0.42	0	0.42	0	{'classifier__max_depth': 10, 'classifier__min_samples_leaf': 5, 'classifier__min_samples_split': 2, 'classifier__n_estimators': 200}	1	quantile-normal	ltsa_lle	random_forest	0
0.12	0.02	0.42	0	0.42	0	{'classifier__max_depth': 10, 'classifier__min_samples_leaf': 5, 'classifier__min_samples_split': 10, 'classifier__n_estimators': 50}	1	quantile-normal	ltsa_lle	random_forest	0
0.15	0.02	0.42	0	0.42	0	{'classifier__max_depth': 10, 'classifier__min_samples_leaf': 5, 'classifier__min_samples_split': 10, 'classifier__n_estimators': 100}	1	quantile-normal	ltsa_lle	random_forest	0
0.22	0.02	0.42	0	0.42	0	{'classifier__max_depth': 10, 'classifier__min_samples_leaf': 5, 'classifier__min_samples_split': 10, 'classifier__n_estimators': 200}	1	quantile-normal	ltsa_lle	random_forest	0
0.12	0.02	0.42	0	0.42	0	{'classifier__max_depth': 10, 'classifier__min_samples_leaf': 5, 'classifier__min_samples_split': 20, 'classifier__n_estimators': 50}	1	quantile-normal	ltsa_lle	random_forest	0
0.15	0.02	0.42	0	0.42	0	{'classifier__max_depth': 10, 'classifier__min_samples_leaf': 5, 'classifier__min_samples_split': 20, 'classifier__n_estimators': 100}	1	quantile-normal	ltsa_lle	random_forest	0
0.22	0.03	0.42	0	0.42	0	{'classifier__max_depth': 10, 'classifier__min_samples_leaf': 5, 'classifier__min_samples_split': 20, 'classifier__n_estimators': 200}	1	quantile-normal	ltsa_lle	random_forest	0
0.12	0.02	0.42	0	0.42	0	{'classifier__max_depth': 10, 'classifier__min_samples_leaf': 10, 'classifier__min_samples_split': 2, 'classifier__n_estimators': 50}	1	quantile-normal	ltsa_lle	random_forest	0
0.15	0.02	0.42	0	0.42	0	{'classifier__max_depth': 10, 'classifier__min_samples_leaf': 10, 'classifier__min_samples_split': 2, 'classifier__n_estimators': 100}	1	quantile-normal	ltsa_lle	random_forest	0
0.22	0.03	0.42	0	0.42	0	{'classifier__max_depth': 10, 'classifier__min_samples_leaf': 10, 'classifier__min_samples_split': 2, 'classifier__n_estimators': 200}	1	quantile-normal	ltsa_lle	random_forest	0
0.12	0.02	0.42	0	0.42	0	{'classifier__max_depth': 10, 'classifier__min_samples_leaf': 10, 'classifier__min_samples_split': 10, 'classifier__n_estimators': 50}	1	quantile-normal	ltsa_lle	random_forest	0
0.15	0.02	0.42	0	0.42	0	{'classifier__max_depth': 10, 'classifier__min_samples_leaf': 10, 'classifier__min_samples_split': 10, 'classifier__n_estimators': 100}	1	quantile-normal	ltsa_lle	random_forest	0
0.22	0.03	0.42	0	0.42	0	{'classifier__max_depth': 10, 'classifier__min_samples_leaf': 10, 'classifier__min_samples_split': 10, 'classifier__n_estimators': 200}	1	quantile-normal	ltsa_lle	random_forest	0
0.12	0.02	0.42	0	0.42	0	{'classifier__max_depth': 10, 'classifier__min_samples_leaf': 10, 'classifier__min_samples_split': 20, 'classifier__n_estimators': 50}	1	quantile-normal	ltsa_lle	random_forest	0
0.16	0.02	0.42	0	0.42	0	{'classifier__max_depth': 10, 'classifier__min_samples_leaf': 10, 'classifier__min_samples_split': 20, 'classifier__n_estimators': 100}	1	quantile-normal	ltsa_lle	random_forest	0
0.22	0.03	0.42	0	0.42	0	{'classifier__max_depth': 10, 'classifier__min_samples_leaf': 10, 'classifier__min_samples_split': 20, 'classifier__n_estimators': 200}	1	quantile-normal	ltsa_lle	random_forest	0
0.12	0.02	0.42	0	0.42	0	{'classifier__max_depth': 20, 'classifier__min_samples_leaf': 1, 'classifier__min_samples_split': 2, 'classifier__n_estimators': 50}	1	quantile-normal	ltsa_lle	random_forest	0
0.15	0.02	0.42	0	0.42	0	{'classifier__max_depth': 20, 'classifier__min_samples_leaf': 1, 'classifier__min_samples_split': 2, 'classifier__n_estimators': 100}	1	quantile-normal	ltsa_lle	random_forest	0
0.22	0.03	0.42	0	0.42	0	{'classifier__max_depth': 20, 'classifier__min_samples_leaf': 1, 'classifier__min_samples_split': 2, 'classifier__n_estimators': 200}	1	quantile-normal	ltsa_lle	random_forest	0
0.12	0.02	0.42	0	0.42	0	{'classifier__max_depth': 20, 'classifier__min_samples_leaf': 1, 'classifier__min_samples_split': 10, 'classifier__n_estimators': 50}	1	quantile-normal	ltsa_lle	random_forest	0
0.15	0.02	0.42	0	0.42	0	{'classifier__max_depth': 20, 'classifier__min_samples_leaf': 1, 'classifier__min_samples_split': 10, 'classifier__n_estimators': 100}	1	quantile-normal	ltsa_lle	random_forest	0
0.23	0.03	0.42	0	0.42	0	{'classifier__max_depth': 20, 'classifier__min_samples_leaf': 1, 'classifier__min_samples_split': 10, 'classifier__n_estimators': 200}	1	quantile-normal	ltsa_lle	random_forest	0
0.12	0.02	0.42	0	0.42	0	{'classifier__max_depth': 20, 'classifier__min_samples_leaf': 1, 'classifier__min_samples_split': 20, 'classifier__n_estimators': 50}	1	quantile-normal	ltsa_lle	random_forest	0
0.15	0.02	0.42	0	0.42	0	{'classifier__max_depth': 20, 'classifier__min_samples_leaf': 1, 'classifier__min_samples_split': 20, 'classifier__n_estimators': 100}	1	quantile-normal	ltsa_lle	random_forest	0
0.22	0.03	0.42	0	0.42	0	{'classifier__max_depth': 20, 'classifier__min_samples_leaf': 1, 'classifier__min_samples_split': 20, 'classifier__n_estimators': 200}	1	quantile-normal	ltsa_lle	random_forest	0
0.12	0.02	0.42	0	0.42	0	{'classifier__max_depth': 20, 'classifier__min_samples_leaf': 5, 'classifier__min_samples_split': 2, 'classifier__n_estimators': 50}	1	quantile-normal	ltsa_lle	random_forest	0
0.16	0.02	0.42	0	0.42	0	{'classifier__max_depth': 20, 'classifier__min_samples_leaf': 5, 'classifier__min_samples_split': 2, 'classifier__n_estimators': 100}	1	quantile-normal	ltsa_lle	random_forest	0
0.22	0.03	0.42	0	0.42	0	{'classifier__max_depth': 20, 'classifier__min_samples_leaf': 5, 'classifier__min_samples_split': 2, 'classifier__n_estimators': 200}	1	quantile-normal	ltsa_lle	random_forest	0
0.12	0.02	0.42	0	0.42	0	{'classifier__max_depth': 20, 'classifier__min_samples_leaf': 5, 'classifier__min_samples_split': 10, 'classifier__n_estimators': 50}	1	quantile-normal	ltsa_lle	random_forest	0
0.15	0.02	0.42	0	0.42	0	{'classifier__max_depth': 20, 'classifier__min_samples_leaf': 5, 'classifier__min_samples_split': 10, 'classifier__n_estimators': 100}	1	quantile-normal	ltsa_lle	random_forest	0
0.23	0.03	0.42	0	0.42	0	{'classifier__max_depth': 20, 'classifier__min_samples_leaf': 5, 'classifier__min_samples_split': 10, 'classifier__n_estimators': 200}	1	quantile-normal	ltsa_lle	random_forest	0
0.12	0.02	0.42	0	0.42	0	{'classifier__max_depth': 20, 'classifier__min_samples_leaf': 5, 'classifier__min_samples_split': 20, 'classifier__n_estimators': 50}	1	quantile-normal	ltsa_lle	random_forest	0
0.15	0.02	0.42	0	0.42	0	{'classifier__max_depth': 20, 'classifier__min_samples_leaf': 5, 'classifier__min_samples_split': 20, 'classifier__n_estimators': 100}	1	quantile-normal	ltsa_lle	random_forest	0
0.22	0.02	0.42	0	0.42	0	{'classifier__max_depth': 20, 'classifier__min_samples_leaf': 5, 'classifier__min_samples_split': 20, 'classifier__n_estimators': 200}	1	quantile-normal	ltsa_lle	random_forest	0
0.12	0.02	0.42	0	0.42	0	{'classifier__max_depth': 20, 'classifier__min_samples_leaf': 10, 'classifier__min_samples_split': 2, 'classifier__n_estimators': 50}	1	quantile-normal	ltsa_lle	random_forest	0
0.15	0.02	0.42	0	0.42	0	{'classifier__max_depth': 20, 'classifier__min_samples_leaf': 10, 'classifier__min_samples_split': 2, 'classifier__n_estimators': 100}	1	quantile-normal	ltsa_lle	random_forest	0
0.22	0.02	0.42	0	0.42	0	{'classifier__max_depth': 20, 'classifier__min_samples_leaf': 10, 'classifier__min_samples_split': 2, 'classifier__n_estimators': 200}	1	quantile-normal	ltsa_lle	random_forest	0
0.12	0.02	0.42	0	0.42	0	{'classifier__max_depth': 20, 'classifier__min_samples_leaf': 10, 'classifier__min_samples_split': 10, 'classifier__n_estimators': 50}	1	quantile-normal	ltsa_lle	random_forest	0
0.15	0.02	0.42	0	0.42	0	{'classifier__max_depth': 20, 'classifier__min_samples_leaf': 10, 'classifier__min_samples_split': 10, 'classifier__n_estimators': 100}	1	quantile-normal	ltsa_lle	random_forest	0
0.22	0.03	0.42	0	0.42	0	{'classifier__max_depth': 20, 'classifier__min_samples_leaf': 10, 'classifier__min_samples_split': 10, 'classifier__n_estimators': 200}	1	quantile-normal	ltsa_lle	random_forest	0
0.12	0.02	0.42	0	0.42	0	{'classifier__max_depth': 20, 'classifier__min_samples_leaf': 10, 'classifier__min_samples_split': 20, 'classifier__n_estimators': 50}	1	quantile-normal	ltsa_lle	random_forest	0
0.15	0.02	0.42	0	0.42	0	{'classifier__max_depth': 20, 'classifier__min_samples_leaf': 10, 'classifier__min_samples_split': 20, 'classifier__n_estimators': 100}	1	quantile-normal	ltsa_lle	random_forest	0
0.22	0.02	0.42	0	0.42	0	{'classifier__max_depth': 20, 'classifier__min_samples_leaf': 10, 'classifier__min_samples_split': 20, 'classifier__n_estimators': 200}	1	quantile-normal	ltsa_lle	random_forest	0
0.07	0.02	0.42	0	0.42	0	{'classifier__max_depth': 5, 'classifier__min_samples_leaf': 1, 'classifier__min_samples_split': 2}	1	quantile-normal	ltsa_lle	decision_tree	0
0.08	0.02	0.42	0	0.42	0	{'classifier__max_depth': 5, 'classifier__min_samples_leaf': 1, 'classifier__min_samples_split': 10}	1	quantile-normal	ltsa_lle	decision_tree	0
0.08	0.02	0.42	0	0.42	0	{'classifier__max_depth': 5, 'classifier__min_samples_leaf': 1, 'classifier__min_samples_split': 20}	1	quantile-normal	ltsa_lle	decision_tree	0
0.08	0.02	0.42	0	0.42	0	{'classifier__max_depth': 5, 'classifier__min_samples_leaf': 5, 'classifier__min_samples_split': 2}	1	quantile-normal	ltsa_lle	decision_tree	0
0.08	0.02	0.42	0	0.42	0	{'classifier__max_depth': 5, 'classifier__min_samples_leaf': 5, 'classifier__min_samples_split': 10}	1	quantile-normal	ltsa_lle	decision_tree	0
0.08	0.02	0.42	0	0.42	0	{'classifier__max_depth': 5, 'classifier__min_samples_leaf': 5, 'classifier__min_samples_split': 20}	1	quantile-normal	ltsa_lle	decision_tree	0
0.08	0.02	0.42	0	0.42	0	{'classifier__max_depth': 5, 'classifier__min_samples_leaf': 10, 'classifier__min_samples_split': 2}	1	quantile-normal	ltsa_lle	decision_tree	0
0.08	0.02	0.42	0	0.42	0	{'classifier__max_depth': 5, 'classifier__min_samples_leaf': 10, 'classifier__min_samples_split': 10}	1	quantile-normal	ltsa_lle	decision_tree	0
0.08	0.02	0.42	0	0.42	0	{'classifier__max_depth': 5, 'classifier__min_samples_leaf': 10, 'classifier__min_samples_split': 20}	1	quantile-normal	ltsa_lle	decision_tree	0
0.08	0.02	0.42	0	0.42	0	{'classifier__max_depth': 10, 'classifier__min_samples_leaf': 1, 'classifier__min_samples_split': 2}	1	quantile-normal	ltsa_lle	decision_tree	0
0.08	0.02	0.42	0	0.42	0	{'classifier__max_depth': 10, 'classifier__min_samples_leaf': 1, 'classifier__min_samples_split': 10}	1	quantile-normal	ltsa_lle	decision_tree	0
0.08	0.02	0.42	0	0.42	0	{'classifier__max_depth': 10, 'classifier__min_samples_leaf': 1, 'classifier__min_samples_split': 20}	1	quantile-normal	ltsa_lle	decision_tree	0
0.08	0.02	0.42	0	0.42	0	{'classifier__max_depth': 10, 'classifier__min_samples_leaf': 5, 'classifier__min_samples_split': 2}	1	quantile-normal	ltsa_lle	decision_tree	0
0.08	0.02	0.42	0	0.42	0	{'classifier__max_depth': 10, 'classifier__min_samples_leaf': 5, 'classifier__min_samples_split': 10}	1	quantile-normal	ltsa_lle	decision_tree	0
0.08	0.02	0.42	0	0.42	0	{'classifier__max_depth': 10, 'classifier__min_samples_leaf': 5, 'classifier__min_samples_split': 20}	1	quantile-normal	ltsa_lle	decision_tree	0
0.08	0.02	0.42	0	0.42	0	{'classifier__max_depth': 10, 'classifier__min_samples_leaf': 10, 'classifier__min_samples_split': 2}	1	quantile-normal	ltsa_lle	decision_tree	0
0.08	0.02	0.42	0	0.42	0	{'classifier__max_depth': 10, 'classifier__min_samples_leaf': 10, 'classifier__min_samples_split': 10}	1	quantile-normal	ltsa_lle	decision_tree	0
0.08	0.02	0.42	0	0.42	0	{'classifier__max_depth': 10, 'classifier__min_samples_leaf': 10, 'classifier__min_samples_split': 20}	1	quantile-normal	ltsa_lle	decision_tree	0
0.08	0.02	0.42	0	0.42	0	{'classifier__max_depth': 20, 'classifier__min_samples_leaf': 1, 'classifier__min_samples_split': 2}	1	quantile-normal	ltsa_lle	decision_tree	0
0.08	0.02	0.42	0	0.42	0	{'classifier__max_depth': 20, 'classifier__min_samples_leaf': 1, 'classifier__min_samples_split': 10}	1	quantile-normal	ltsa_lle	decision_tree	0
0.08	0.02	0.42	0	0.42	0	{'classifier__max_depth': 20, 'classifier__min_samples_leaf': 1, 'classifier__min_samples_split': 20}	1	quantile-normal	ltsa_lle	decision_tree	0
0.08	0.02	0.42	0	0.42	0	{'classifier__max_depth': 20, 'classifier__min_samples_leaf': 5, 'classifier__min_samples_split': 2}	1	quantile-normal	ltsa_lle	decision_tree	0
0.08	0.02	0.42	0	0.42	0	{'classifier__max_depth': 20, 'classifier__min_samples_leaf': 5, 'classifier__min_samples_split': 10}	1	quantile-normal	ltsa_lle	decision_tree	0
0.08	0.02	0.42	0	0.42	0	{'classifier__max_depth': 20, 'classifier__min_samples_leaf': 5, 'classifier__min_samples_split': 20}	1	quantile-normal	ltsa_lle	decision_tree	0
0.08	0.02	0.42	0	0.42	0	{'classifier__max_depth': 20, 'classifier__min_samples_leaf': 10, 'classifier__min_samples_split': 2}	1	quantile-normal	ltsa_lle	decision_tree	0
0.08	0.02	0.42	0	0.42	0	{'classifier__max_depth': 20, 'classifier__min_samples_leaf': 10, 'classifier__min_samples_split': 10}	1	quantile-normal	ltsa_lle	decision_tree	0
0.08	0.02	0.42	0	0.42	0	{'classifier__max_depth': 20, 'classifier__min_samples_leaf': 10, 'classifier__min_samples_split': 20}	1	quantile-normal	ltsa_lle	decision_tree	0
0.04	0	0.42	0.02	0.42	0.01	{'classifier__C': 0.1, 'classifier__gamma': 'auto'}	2	quantile-uniform	random_projection	svm_sigmoid	-0.01
0.21	0	0.42	0	0.42	0	{'classifier__C': 0.1, 'classifier__gamma': 'scale'}	1	quantile-uniform	truncatedsvd	svm_sigmoid	0
0.06	0	0.42	0	0.42	0	{'classifier__C': 0.1, 'classifier__gamma': 'auto'}	1	quantile-uniform	truncatedsvd	svm_sigmoid	0
0.07	0	0.42	0	0.42	0	{'classifier__C': 1, 'classifier__gamma': 'scale'}	1	quantile-uniform	truncatedsvd	svm_sigmoid	0
0.19	0	0.42	0	0.42	0	{'classifier__C': 1, 'classifier__gamma': 'auto'}	1	quantile-uniform	truncatedsvd	svm_sigmoid	0
0.05	0	0.42	0	0.42	0	{'classifier__C': 10, 'classifier__gamma': 'auto'}	1	quantile-uniform	truncatedsvd	svm_sigmoid	0
0.1	0.01	0.42	0	0.42	0	{'classifier__max_depth': None, 'classifier__min_samples_leaf': 1, 'classifier__min_samples_split': 2, 'classifier__n_estimators': 50}	1	quantile-uniform	ltsa_lle	random_forest	0
0.12	0.01	0.42	0	0.42	0	{'classifier__max_depth': None, 'classifier__min_samples_leaf': 1, 'classifier__min_samples_split': 2, 'classifier__n_estimators': 100}	1	quantile-uniform	ltsa_lle	random_forest	0
0.21	0.01	0.42	0	0.42	0	{'classifier__max_depth': None, 'classifier__min_samples_leaf': 1, 'classifier__min_samples_split': 2, 'classifier__n_estimators': 200}	1	quantile-uniform	ltsa_lle	random_forest	0
0.1	0.01	0.42	0	0.42	0	{'classifier__max_depth': None, 'classifier__min_samples_leaf': 1, 'classifier__min_samples_split': 10, 'classifier__n_estimators': 50}	1	quantile-uniform	ltsa_lle	random_forest	0
0.14	0.01	0.42	0	0.42	0	{'classifier__max_depth': None, 'classifier__min_samples_leaf': 1, 'classifier__min_samples_split': 10, 'classifier__n_estimators': 100}	1	quantile-uniform	ltsa_lle	random_forest	0
0.21	0.01	0.42	0	0.42	0	{'classifier__max_depth': None, 'classifier__min_samples_leaf': 1, 'classifier__min_samples_split': 10, 'classifier__n_estimators': 200}	1	quantile-uniform	ltsa_lle	random_forest	0
0.1	0.01	0.42	0	0.42	0	{'classifier__max_depth': None, 'classifier__min_samples_leaf': 1, 'classifier__min_samples_split': 20, 'classifier__n_estimators': 50}	1	quantile-uniform	ltsa_lle	random_forest	0
0.14	0.01	0.42	0	0.42	0	{'classifier__max_depth': None, 'classifier__min_samples_leaf': 1, 'classifier__min_samples_split': 20, 'classifier__n_estimators': 100}	1	quantile-uniform	ltsa_lle	random_forest	0
0.21	0.01	0.42	0	0.42	0	{'classifier__max_depth': None, 'classifier__min_samples_leaf': 1, 'classifier__min_samples_split': 20, 'classifier__n_estimators': 200}	1	quantile-uniform	ltsa_lle	random_forest	0
0.1	0.01	0.42	0	0.42	0	{'classifier__max_depth': None, 'classifier__min_samples_leaf': 5, 'classifier__min_samples_split': 2, 'classifier__n_estimators': 50}	1	quantile-uniform	ltsa_lle	random_forest	0
0.14	0.01	0.42	0	0.42	0	{'classifier__max_depth': None, 'classifier__min_samples_leaf': 5, 'classifier__min_samples_split': 2, 'classifier__n_estimators': 100}	1	quantile-uniform	ltsa_lle	random_forest	0
0.22	0.01	0.42	0	0.42	0	{'classifier__max_depth': None, 'classifier__min_samples_leaf': 5, 'classifier__min_samples_split': 2, 'classifier__n_estimators': 200}	1	quantile-uniform	ltsa_lle	random_forest	0
0.11	0.01	0.42	0	0.42	0	{'classifier__max_depth': None, 'classifier__min_samples_leaf': 5, 'classifier__min_samples_split': 10, 'classifier__n_estimators': 50}	1	quantile-uniform	ltsa_lle	random_forest	0
0.14	0.01	0.42	0	0.42	0	{'classifier__max_depth': None, 'classifier__min_samples_leaf': 5, 'classifier__min_samples_split': 10, 'classifier__n_estimators': 100}	1	quantile-uniform	ltsa_lle	random_forest	0
0.21	0.01	0.42	0	0.42	0	{'classifier__max_depth': None, 'classifier__min_samples_leaf': 5, 'classifier__min_samples_split': 10, 'classifier__n_estimators': 200}	1	quantile-uniform	ltsa_lle	random_forest	0
0.1	0.01	0.42	0	0.42	0	{'classifier__max_depth': None, 'classifier__min_samples_leaf': 5, 'classifier__min_samples_split': 20, 'classifier__n_estimators': 50}	1	quantile-uniform	ltsa_lle	random_forest	0
0.14	0.01	0.42	0	0.42	0	{'classifier__max_depth': None, 'classifier__min_samples_leaf': 5, 'classifier__min_samples_split': 20, 'classifier__n_estimators': 100}	1	quantile-uniform	ltsa_lle	random_forest	0
0.21	0.01	0.42	0	0.42	0	{'classifier__max_depth': None, 'classifier__min_samples_leaf': 5, 'classifier__min_samples_split': 20, 'classifier__n_estimators': 200}	1	quantile-uniform	ltsa_lle	random_forest	0
0.1	0.01	0.42	0	0.42	0	{'classifier__max_depth': None, 'classifier__min_samples_leaf': 10, 'classifier__min_samples_split': 2, 'classifier__n_estimators': 50}	1	quantile-uniform	ltsa_lle	random_forest	0
0.14	0.01	0.42	0	0.42	0	{'classifier__max_depth': None, 'classifier__min_samples_leaf': 10, 'classifier__min_samples_split': 2, 'classifier__n_estimators': 100}	1	quantile-uniform	ltsa_lle	random_forest	0
0.21	0.01	0.42	0	0.42	0	{'classifier__max_depth': None, 'classifier__min_samples_leaf': 10, 'classifier__min_samples_split': 2, 'classifier__n_estimators': 200}	1	quantile-uniform	ltsa_lle	random_forest	0
0.11	0.01	0.42	0	0.42	0	{'classifier__max_depth': None, 'classifier__min_samples_leaf': 10, 'classifier__min_samples_split': 10, 'classifier__n_estimators': 50}	1	quantile-uniform	ltsa_lle	random_forest	0
0.14	0.01	0.42	0	0.42	0	{'classifier__max_depth': None, 'classifier__min_samples_leaf': 10, 'classifier__min_samples_split': 10, 'classifier__n_estimators': 100}	1	quantile-uniform	ltsa_lle	random_forest	0
0.21	0.01	0.42	0	0.42	0	{'classifier__max_depth': None, 'classifier__min_samples_leaf': 10, 'classifier__min_samples_split': 10, 'classifier__n_estimators': 200}	1	quantile-uniform	ltsa_lle	random_forest	0
0.1	0.01	0.42	0	0.42	0	{'classifier__max_depth': None, 'classifier__min_samples_leaf': 10, 'classifier__min_samples_split': 20, 'classifier__n_estimators': 50}	1	quantile-uniform	ltsa_lle	random_forest	0
0.14	0.01	0.42	0	0.42	0	{'classifier__max_depth': None, 'classifier__min_samples_leaf': 10, 'classifier__min_samples_split': 20, 'classifier__n_estimators': 100}	1	quantile-uniform	ltsa_lle	random_forest	0
0.21	0.01	0.42	0	0.42	0	{'classifier__max_depth': None, 'classifier__min_samples_leaf': 10, 'classifier__min_samples_split': 20, 'classifier__n_estimators': 200}	1	quantile-uniform	ltsa_lle	random_forest	0
0.1	0.01	0.42	0	0.42	0	{'classifier__max_depth': 10, 'classifier__min_samples_leaf': 1, 'classifier__min_samples_split': 2, 'classifier__n_estimators': 50}	1	quantile-uniform	ltsa_lle	random_forest	0
0.14	0.01	0.42	0	0.42	0	{'classifier__max_depth': 10, 'classifier__min_samples_leaf': 1, 'classifier__min_samples_split': 2, 'classifier__n_estimators': 100}	1	quantile-uniform	ltsa_lle	random_forest	0
0.21	0.01	0.42	0	0.42	0	{'classifier__max_depth': 10, 'classifier__min_samples_leaf': 1, 'classifier__min_samples_split': 2, 'classifier__n_estimators': 200}	1	quantile-uniform	ltsa_lle	random_forest	0
0.1	0.01	0.42	0	0.42	0	{'classifier__max_depth': 10, 'classifier__min_samples_leaf': 1, 'classifier__min_samples_split': 10, 'classifier__n_estimators': 50}	1	quantile-uniform	ltsa_lle	random_forest	0
0.13	0.01	0.42	0	0.42	0	{'classifier__max_depth': 10, 'classifier__min_samples_leaf': 1, 'classifier__min_samples_split': 10, 'classifier__n_estimators': 100}	1	quantile-uniform	ltsa_lle	random_forest	0
0.21	0.01	0.42	0	0.42	0	{'classifier__max_depth': 10, 'classifier__min_samples_leaf': 1, 'classifier__min_samples_split': 10, 'classifier__n_estimators': 200}	1	quantile-uniform	ltsa_lle	random_forest	0
0.1	0.01	0.42	0	0.42	0	{'classifier__max_depth': 10, 'classifier__min_samples_leaf': 1, 'classifier__min_samples_split': 20, 'classifier__n_estimators': 50}	1	quantile-uniform	ltsa_lle	random_forest	0
0.14	0.01	0.42	0	0.42	0	{'classifier__max_depth': 10, 'classifier__min_samples_leaf': 1, 'classifier__min_samples_split': 20, 'classifier__n_estimators': 100}	1	quantile-uniform	ltsa_lle	random_forest	0
0.21	0.01	0.42	0	0.42	0	{'classifier__max_depth': 10, 'classifier__min_samples_leaf': 1, 'classifier__min_samples_split': 20, 'classifier__n_estimators': 200}	1	quantile-uniform	ltsa_lle	random_forest	0
0.11	0.01	0.42	0	0.42	0	{'classifier__max_depth': 10, 'classifier__min_samples_leaf': 5, 'classifier__min_samples_split': 2, 'classifier__n_estimators': 50}	1	quantile-uniform	ltsa_lle	random_forest	0
0.14	0.01	0.42	0	0.42	0	{'classifier__max_depth': 10, 'classifier__min_samples_leaf': 5, 'classifier__min_samples_split': 2, 'classifier__n_estimators': 100}	1	quantile-uniform	ltsa_lle	random_forest	0
0.21	0.01	0.42	0	0.42	0	{'classifier__max_depth': 10, 'classifier__min_samples_leaf': 5, 'classifier__min_samples_split': 2, 'classifier__n_estimators': 200}	1	quantile-uniform	ltsa_lle	random_forest	0
0.1	0.01	0.42	0	0.42	0	{'classifier__max_depth': 10, 'classifier__min_samples_leaf': 5, 'classifier__min_samples_split': 10, 'classifier__n_estimators': 50}	1	quantile-uniform	ltsa_lle	random_forest	0
0.14	0.01	0.42	0	0.42	0	{'classifier__max_depth': 10, 'classifier__min_samples_leaf': 5, 'classifier__min_samples_split': 10, 'classifier__n_estimators': 100}	1	quantile-uniform	ltsa_lle	random_forest	0
0.22	0.01	0.42	0	0.42	0	{'classifier__max_depth': 10, 'classifier__min_samples_leaf': 5, 'classifier__min_samples_split': 10, 'classifier__n_estimators': 200}	1	quantile-uniform	ltsa_lle	random_forest	0
0.11	0.01	0.42	0	0.42	0	{'classifier__max_depth': 10, 'classifier__min_samples_leaf': 5, 'classifier__min_samples_split': 20, 'classifier__n_estimators': 50}	1	quantile-uniform	ltsa_lle	random_forest	0
0.14	0.01	0.42	0	0.42	0	{'classifier__max_depth': 10, 'classifier__min_samples_leaf': 5, 'classifier__min_samples_split': 20, 'classifier__n_estimators': 100}	1	quantile-uniform	ltsa_lle	random_forest	0
0.21	0.01	0.42	0	0.42	0	{'classifier__max_depth': 10, 'classifier__min_samples_leaf': 5, 'classifier__min_samples_split': 20, 'classifier__n_estimators': 200}	1	quantile-uniform	ltsa_lle	random_forest	0
0.1	0.01	0.42	0	0.42	0	{'classifier__max_depth': 10, 'classifier__min_samples_leaf': 10, 'classifier__min_samples_split': 2, 'classifier__n_estimators': 50}	1	quantile-uniform	ltsa_lle	random_forest	0
0.14	0.01	0.42	0	0.42	0	{'classifier__max_depth': 10, 'classifier__min_samples_leaf': 10, 'classifier__min_samples_split': 2, 'classifier__n_estimators': 100}	1	quantile-uniform	ltsa_lle	random_forest	0
0.21	0.01	0.42	0	0.42	0	{'classifier__max_depth': 10, 'classifier__min_samples_leaf': 10, 'classifier__min_samples_split': 2, 'classifier__n_estimators': 200}	1	quantile-uniform	ltsa_lle	random_forest	0
0.11	0.01	0.42	0	0.42	0	{'classifier__max_depth': 10, 'classifier__min_samples_leaf': 10, 'classifier__min_samples_split': 10, 'classifier__n_estimators': 50}	1	quantile-uniform	ltsa_lle	random_forest	0
0.14	0.01	0.42	0	0.42	0	{'classifier__max_depth': 10, 'classifier__min_samples_leaf': 10, 'classifier__min_samples_split': 10, 'classifier__n_estimators': 100}	1	quantile-uniform	ltsa_lle	random_forest	0
0.21	0.01	0.42	0	0.42	0	{'classifier__max_depth': 10, 'classifier__min_samples_leaf': 10, 'classifier__min_samples_split': 10, 'classifier__n_estimators': 200}	1	quantile-uniform	ltsa_lle	random_forest	0
0.1	0.01	0.42	0	0.42	0	{'classifier__max_depth': 10, 'classifier__min_samples_leaf': 10, 'classifier__min_samples_split': 20, 'classifier__n_estimators': 50}	1	quantile-uniform	ltsa_lle	random_forest	0
0.14	0.01	0.42	0	0.42	0	{'classifier__max_depth': 10, 'classifier__min_samples_leaf': 10, 'classifier__min_samples_split': 20, 'classifier__n_estimators': 100}	1	quantile-uniform	ltsa_lle	random_forest	0
0.21	0.01	0.42	0	0.42	0	{'classifier__max_depth': 10, 'classifier__min_samples_leaf': 10, 'classifier__min_samples_split': 20, 'classifier__n_estimators': 200}	1	quantile-uniform	ltsa_lle	random_forest	0
0.1	0.01	0.42	0	0.42	0	{'classifier__max_depth': 20, 'classifier__min_samples_leaf': 1, 'classifier__min_samples_split': 2, 'classifier__n_estimators': 50}	1	quantile-uniform	ltsa_lle	random_forest	0
0.14	0.01	0.42	0	0.42	0	{'classifier__max_depth': 20, 'classifier__min_samples_leaf': 1, 'classifier__min_samples_split': 2, 'classifier__n_estimators': 100}	1	quantile-uniform	ltsa_lle	random_forest	0
0.21	0.01	0.42	0	0.42	0	{'classifier__max_depth': 20, 'classifier__min_samples_leaf': 1, 'classifier__min_samples_split': 2, 'classifier__n_estimators': 200}	1	quantile-uniform	ltsa_lle	random_forest	0
0.1	0.01	0.42	0	0.42	0	{'classifier__max_depth': 20, 'classifier__min_samples_leaf': 1, 'classifier__min_samples_split': 10, 'classifier__n_estimators': 50}	1	quantile-uniform	ltsa_lle	random_forest	0
0.14	0.01	0.42	0	0.42	0	{'classifier__max_depth': 20, 'classifier__min_samples_leaf': 1, 'classifier__min_samples_split': 10, 'classifier__n_estimators': 100}	1	quantile-uniform	ltsa_lle	random_forest	0
0.21	0.01	0.42	0	0.42	0	{'classifier__max_depth': 20, 'classifier__min_samples_leaf': 1, 'classifier__min_samples_split': 10, 'classifier__n_estimators': 200}	1	quantile-uniform	ltsa_lle	random_forest	0
0.1	0.01	0.42	0	0.42	0	{'classifier__max_depth': 20, 'classifier__min_samples_leaf': 1, 'classifier__min_samples_split': 20, 'classifier__n_estimators': 50}	1	quantile-uniform	ltsa_lle	random_forest	0
0.13	0.01	0.42	0	0.42	0	{'classifier__max_depth': 20, 'classifier__min_samples_leaf': 1, 'classifier__min_samples_split': 20, 'classifier__n_estimators': 100}	1	quantile-uniform	ltsa_lle	random_forest	0
0.21	0.01	0.42	0	0.42	0	{'classifier__max_depth': 20, 'classifier__min_samples_leaf': 1, 'classifier__min_samples_split': 20, 'classifier__n_estimators': 200}	1	quantile-uniform	ltsa_lle	random_forest	0
0.11	0.01	0.42	0	0.42	0	{'classifier__max_depth': 20, 'classifier__min_samples_leaf': 5, 'classifier__min_samples_split': 2, 'classifier__n_estimators': 50}	1	quantile-uniform	ltsa_lle	random_forest	0
0.14	0.01	0.42	0	0.42	0	{'classifier__max_depth': 20, 'classifier__min_samples_leaf': 5, 'classifier__min_samples_split': 2, 'classifier__n_estimators': 100}	1	quantile-uniform	ltsa_lle	random_forest	0
0.21	0.01	0.42	0	0.42	0	{'classifier__max_depth': 20, 'classifier__min_samples_leaf': 5, 'classifier__min_samples_split': 2, 'classifier__n_estimators': 200}	1	quantile-uniform	ltsa_lle	random_forest	0
0.1	0.01	0.42	0	0.42	0	{'classifier__max_depth': 20, 'classifier__min_samples_leaf': 5, 'classifier__min_samples_split': 10, 'classifier__n_estimators': 50}	1	quantile-uniform	ltsa_lle	random_forest	0
0.14	0.01	0.42	0	0.42	0	{'classifier__max_depth': 20, 'classifier__min_samples_leaf': 5, 'classifier__min_samples_split': 10, 'classifier__n_estimators': 100}	1	quantile-uniform	ltsa_lle	random_forest	0
0.21	0.01	0.42	0	0.42	0	{'classifier__max_depth': 20, 'classifier__min_samples_leaf': 5, 'classifier__min_samples_split': 10, 'classifier__n_estimators': 200}	1	quantile-uniform	ltsa_lle	random_forest	0
0.1	0.01	0.42	0	0.42	0	{'classifier__max_depth': 20, 'classifier__min_samples_leaf': 5, 'classifier__min_samples_split': 20, 'classifier__n_estimators': 50}	1	quantile-uniform	ltsa_lle	random_forest	0
0.14	0.01	0.42	0	0.42	0	{'classifier__max_depth': 20, 'classifier__min_samples_leaf': 5, 'classifier__min_samples_split': 20, 'classifier__n_estimators': 100}	1	quantile-uniform	ltsa_lle	random_forest	0
0.21	0.01	0.42	0	0.42	0	{'classifier__max_depth': 20, 'classifier__min_samples_leaf': 5, 'classifier__min_samples_split': 20, 'classifier__n_estimators': 200}	1	quantile-uniform	ltsa_lle	random_forest	0
0.1	0.01	0.42	0	0.42	0	{'classifier__max_depth': 20, 'classifier__min_samples_leaf': 10, 'classifier__min_samples_split': 2, 'classifier__n_estimators': 50}	1	quantile-uniform	ltsa_lle	random_forest	0
0.14	0.01	0.42	0	0.42	0	{'classifier__max_depth': 20, 'classifier__min_samples_leaf': 10, 'classifier__min_samples_split': 2, 'classifier__n_estimators': 100}	1	quantile-uniform	ltsa_lle	random_forest	0
0.21	0.01	0.42	0	0.42	0	{'classifier__max_depth': 20, 'classifier__min_samples_leaf': 10, 'classifier__min_samples_split': 2, 'classifier__n_estimators': 200}	1	quantile-uniform	ltsa_lle	random_forest	0
0.1	0.01	0.42	0	0.42	0	{'classifier__max_depth': 20, 'classifier__min_samples_leaf': 10, 'classifier__min_samples_split': 10, 'classifier__n_estimators': 50}	1	quantile-uniform	ltsa_lle	random_forest	0
0.14	0.01	0.42	0	0.42	0	{'classifier__max_depth': 20, 'classifier__min_samples_leaf': 10, 'classifier__min_samples_split': 10, 'classifier__n_estimators': 100}	1	quantile-uniform	ltsa_lle	random_forest	0
0.21	0.01	0.42	0	0.42	0	{'classifier__max_depth': 20, 'classifier__min_samples_leaf': 10, 'classifier__min_samples_split': 10, 'classifier__n_estimators': 200}	1	quantile-uniform	ltsa_lle	random_forest	0
0.1	0.01	0.42	0	0.42	0	{'classifier__max_depth': 20, 'classifier__min_samples_leaf': 10, 'classifier__min_samples_split': 20, 'classifier__n_estimators': 50}	1	quantile-uniform	ltsa_lle	random_forest	0
0.14	0.01	0.42	0	0.42	0	{'classifier__max_depth': 20, 'classifier__min_samples_leaf': 10, 'classifier__min_samples_split': 20, 'classifier__n_estimators': 100}	1	quantile-uniform	ltsa_lle	random_forest	0
0.2	0.01	0.42	0	0.42	0	{'classifier__max_depth': 20, 'classifier__min_samples_leaf': 10, 'classifier__min_samples_split': 20, 'classifier__n_estimators': 200}	1	quantile-uniform	ltsa_lle	random_forest	0
0.06	0.01	0.42	0	0.42	0	{'classifier__max_depth': 5, 'classifier__min_samples_leaf': 1, 'classifier__min_samples_split': 2}	1	quantile-uniform	ltsa_lle	decision_tree	0
0.06	0.01	0.42	0	0.42	0	{'classifier__max_depth': 5, 'classifier__min_samples_leaf': 1, 'classifier__min_samples_split': 10}	1	quantile-uniform	ltsa_lle	decision_tree	0
0.06	0.01	0.42	0	0.42	0	{'classifier__max_depth': 5, 'classifier__min_samples_leaf': 1, 'classifier__min_samples_split': 20}	1	quantile-uniform	ltsa_lle	decision_tree	0
0.07	0	0.42	0	0.42	0	{'classifier__max_depth': 5, 'classifier__min_samples_leaf': 5, 'classifier__min_samples_split': 2}	1	quantile-uniform	ltsa_lle	decision_tree	0
0.06	0.01	0.42	0	0.42	0	{'classifier__max_depth': 5, 'classifier__min_samples_leaf': 5, 'classifier__min_samples_split': 10}	1	quantile-uniform	ltsa_lle	decision_tree	0
0.06	0.01	0.42	0	0.42	0	{'classifier__max_depth': 5, 'classifier__min_samples_leaf': 5, 'classifier__min_samples_split': 20}	1	quantile-uniform	ltsa_lle	decision_tree	0
0.07	0	0.42	0	0.42	0	{'classifier__max_depth': 5, 'classifier__min_samples_leaf': 10, 'classifier__min_samples_split': 2}	1	quantile-uniform	ltsa_lle	decision_tree	0
0.07	0.01	0.42	0	0.42	0	{'classifier__max_depth': 5, 'classifier__min_samples_leaf': 10, 'classifier__min_samples_split': 10}	1	quantile-uniform	ltsa_lle	decision_tree	0
0.06	0.01	0.42	0	0.42	0	{'classifier__max_depth': 5, 'classifier__min_samples_leaf': 10, 'classifier__min_samples_split': 20}	1	quantile-uniform	ltsa_lle	decision_tree	0
0.07	0.01	0.42	0	0.42	0	{'classifier__max_depth': 10, 'classifier__min_samples_leaf': 1, 'classifier__min_samples_split': 2}	1	quantile-uniform	ltsa_lle	decision_tree	0
0.07	0.01	0.42	0	0.42	0	{'classifier__max_depth': 10, 'classifier__min_samples_leaf': 1, 'classifier__min_samples_split': 10}	1	quantile-uniform	ltsa_lle	decision_tree	0
0.07	0.01	0.42	0	0.42	0	{'classifier__max_depth': 10, 'classifier__min_samples_leaf': 1, 'classifier__min_samples_split': 20}	1	quantile-uniform	ltsa_lle	decision_tree	0
0.06	0.01	0.42	0	0.42	0	{'classifier__max_depth': 10, 'classifier__min_samples_leaf': 5, 'classifier__min_samples_split': 2}	1	quantile-uniform	ltsa_lle	decision_tree	0
0.07	0.01	0.42	0	0.42	0	{'classifier__max_depth': 10, 'classifier__min_samples_leaf': 5, 'classifier__min_samples_split': 10}	1	quantile-uniform	ltsa_lle	decision_tree	0
0.07	0.01	0.42	0	0.42	0	{'classifier__max_depth': 10, 'classifier__min_samples_leaf': 5, 'classifier__min_samples_split': 20}	1	quantile-uniform	ltsa_lle	decision_tree	0
0.07	0.01	0.42	0	0.42	0	{'classifier__max_depth': 10, 'classifier__min_samples_leaf': 10, 'classifier__min_samples_split': 2}	1	quantile-uniform	ltsa_lle	decision_tree	0
0.07	0.01	0.42	0	0.42	0	{'classifier__max_depth': 10, 'classifier__min_samples_leaf': 10, 'classifier__min_samples_split': 10}	1	quantile-uniform	ltsa_lle	decision_tree	0
0.07	0.01	0.42	0	0.42	0	{'classifier__max_depth': 10, 'classifier__min_samples_leaf': 10, 'classifier__min_samples_split': 20}	1	quantile-uniform	ltsa_lle	decision_tree	0
0.07	0.01	0.42	0	0.42	0	{'classifier__max_depth': 20, 'classifier__min_samples_leaf': 1, 'classifier__min_samples_split': 2}	1	quantile-uniform	ltsa_lle	decision_tree	0
0.06	0	0.42	0	0.42	0	{'classifier__max_depth': 20, 'classifier__min_samples_leaf': 1, 'classifier__min_samples_split': 10}	1	quantile-uniform	ltsa_lle	decision_tree	0
0.07	0.01	0.42	0	0.42	0	{'classifier__max_depth': 20, 'classifier__min_samples_leaf': 1, 'classifier__min_samples_split': 20}	1	quantile-uniform	ltsa_lle	decision_tree	0
0.07	0.01	0.42	0	0.42	0	{'classifier__max_depth': 20, 'classifier__min_samples_leaf': 5, 'classifier__min_samples_split': 2}	1	quantile-uniform	ltsa_lle	decision_tree	0
0.07	0.01	0.42	0	0.42	0	{'classifier__max_depth': 20, 'classifier__min_samples_leaf': 5, 'classifier__min_samples_split': 10}	1	quantile-uniform	ltsa_lle	decision_tree	0
0.07	0	0.42	0	0.42	0	{'classifier__max_depth': 20, 'classifier__min_samples_leaf': 5, 'classifier__min_samples_split': 20}	1	quantile-uniform	ltsa_lle	decision_tree	0
0.07	0.01	0.42	0	0.42	0	{'classifier__max_depth': 20, 'classifier__min_samples_leaf': 10, 'classifier__min_samples_split': 2}	1	quantile-uniform	ltsa_lle	decision_tree	0
0.07	0	0.42	0	0.42	0	{'classifier__max_depth': 20, 'classifier__min_samples_leaf': 10, 'classifier__min_samples_split': 10}	1	quantile-uniform	ltsa_lle	decision_tree	0
0.06	0.01	0.42	0	0.42	0	{'classifier__max_depth': 20, 'classifier__min_samples_leaf': 10, 'classifier__min_samples_split': 20}	1	quantile-uniform	ltsa_lle	decision_tree	0
0.03	0.01	0.42	0.01	0.41	0	{'classifier__C': 0.1, 'classifier__gamma': 'auto'}	2	standard	random_projection	svm_sigmoid	0
0.06	0.01	0.42	0	0.41	0	{'classifier__C': 0.1, 'classifier__gamma': 'auto'}	1	robust	pca	svm_sigmoid	0
0.06	0.02	0.41	0.02	0.41	0.01	{'classifier__C': 0.1, 'classifier__gamma': 'auto'}	2	robust	random_projection	svm_sigmoid	0
0.03	0.01	0.4	0.02	0.41	0	{}	1	normalizer	truncatedsvd	lda	0.01
