# Supplementary material for: Synthetic Data Generation for Classifying Electrophysiological and Morpho- Electrophysiological Neurons from Mouse Visual Cortex
Source: Research Square preprint supplement (doi:10.21203/rs.3.rs-7545694/v1), 2025-09-17
Supplement: Supplementary file 3 [file 4d2b5a9255ee6f8bef61f935.docx]

**Supplementary Material – Table 1 :** Electrophysiological cell types (e-types) were systematically classified utilizing 48 quantifiable electrophysiological features, derived from both membrane potential traces and specific action potential (AP) characteristics 8. Morphological cell types (m-types) were categorized utilizing 24 quantitative morphological attributes 38. These selected features are aligned with the specifications outlined in L-Measure, accessible at (<http://cng.gmu.edu:8080/Lm/help/index.htm>) 38. They were generated employing the "Compute Global Features" plugin within the Vaa3D platform, as part of the informatics pipeline 8. The precise procedures involved in the extraction and delineation of both electrophysiological and morphological features are detailed at <http://celltypes.brain-map.org>.

| **Electrophysiological features name** | **Morphological features name** |
| --- | --- |
| Feature_1 : adaptation | Feature_49 : average_bifurcation_angle_local |
| Feature_2 : avg_isi | Feature_50 : average_contraction |
| Feature_3 : electrode_0_pa | Feature_51 : average_diameter |
| Feature_4 : f_i_curve_slope | Feature_52 : average_fragmentation |
| Feature_5 : fast_trough_t_long_square | Feature_53 : average_parent_daughter_ratio |
| Feature_6 : fast_trough_t_ramp | Feature_54 : max_branch_order |
| Feature_7 : fast_trough_t_short_square | Feature_55 : max_euclidean_distance |
| Feature_8 : fast_trough_v_long_square | Feature_56 : max_path_distance |
| Feature_9 : fast_trough_v_ramp | Feature_57 : neuron_reconstruction_type |
| Feature_10 : fast_trough_v_short_square | Feature_58 : number_bifurcations |
| Feature_11 : input_resistance_mohm | Feature_59 : number_branches |
| Feature_12 : latency | Feature_60 : number_nodes |
| Feature_13 : peak_t_long_square | Feature_61 : number_stems |
| Feature_14 : peak_t_ramp | Feature_62 : number_tips |
| Feature_15 : peak_t_short_square | Feature_63 : overall_depth |
| Feature_16 : peak_v_long_square | Feature_64 : overall_height |
| Feature_17 : peak_v_ramp | Feature_65 : overall_width |
| Feature_18 : peak_v_short_square | Feature_66 : scale_factor_x |
| Feature_19 : ri | Feature_67 : scale_factor_y |
| Feature_20 : sag | Feature_68 : scale_factor_z |
| Feature_21 : seal_gohm | Feature_69 : soma_surface |
| Feature_22 : slow_trough_t_long_square | Feature_70 : total_length |
| Feature_23 : slow_trough_t_ramp | Feature_71 : total_surface |
| Feature_24 : slow_trough_t_short_square | Feature_72 : total_volume |
| Feature_25 : slow_trough_v_long_square |  |
| Feature_26 : slow_trough_v_ramp |  |
| Feature_27 : slow_trough_v_short_square |  |
| Feature_28 : tau |  |
| Feature_29 : threshold_i_long_square |  |
| Feature_30 : threshold_i_ramp |  |
| Feature_31 : threshold_i_short_square |  |
| Feature_32 : threshold_t_long_square |  |
| Feature_33 : threshold_t_ramp |  |
| Feature_34 : threshold_t_short_square |  |
| Feature_35 : threshold_v_long_square |  |
| Feature_36 : threshold_v_ramp |  |
| Feature_37 : threshold_v_short_square |  |
| Feature_38 : trough_t_long_square |  |
| Feature_39 : trough_t_ramp |  |
| Feature_40 : trough_t_short_square |  |
| Feature_41 : trough_v_long_square |  |
| Feature_42 : trough_v_ramp |  |
| Feature_43 : trough_v_short_square |  |
| Feature_44 : upstroke_downstroke_ratio_long_square |  |
| Feature_45 : upstroke_downstroke_ratio_ramp |  |
| Feature_46 : upstroke_downstroke_ratio_short_square |  |
| Feature_47 : vm_for_sag |  |
| Feature_48 : vrest |  |
