# Supplementary material for: Synthetic Data Generation for Classifying Electrophysiological and Morpho- Electrophysiological Neurons from Mouse Visual Cortex
Source: Research Square preprint supplement (doi:10.21203/rs.3.rs-7545694/v1), 2025-09-17
Supplement: Supplementary file 4 [file 781b50f9d18ba1d38e7ea2fa.xlsx]

## Sheet: Feuil1
file	classifier	mean_test_accuracy	test_std	test_ci_low	test_ci_high	weighted_precision	prec_std	prec_ci_low	prec_ci_high	brier_score
mee-type_ddpm_maxabs_5.csv	SVM_rbf_1	0.27674418604651163	0.17832827453656572	0.05532038769266054	0.4981679844003627	0.10202812330989723	0.08709055268064836	-0.006109080537332362	0.21016532715712682	nan
mee-type_ddpm_maxabs_5.csv	SVM_rbf_2	0.27674418604651163	0.17832827453656572	0.05532038769266054	0.4981679844003627	0.10202812330989723	0.08709055268064836	-0.006109080537332362	0.21016532715712682	nan
mee-type_ddpm_maxabs_5.csv	SVM_rbf_3	0.27674418604651163	0.17832827453656572	0.05532038769266054	0.4981679844003627	0.10202812330989723	0.08709055268064836	-0.006109080537332362	0.21016532715712682	nan
mee-type_ddpm_maxabs_5.csv	SVM_rbf_4	0.32325581395348835	0.10951241560903352	0.18727819013542324	0.45923343777155345	0.2847310163548881	0.13952960470928244	0.1114821295037694	0.45797990320600684	nan
mee-type_ddpm_maxabs_5.csv	SVM_rbf_5	0.3116279069767442	0.14203192078699972	0.13527198433979745	0.4879838296136909	0.3232077924340144	0.17614685464726154	0.1044925846216779	0.5419230002463509	nan
mee-type_ddpm_maxabs_5.csv	SVM_rbf_6	0.32325581395348835	0.10951241560903352	0.18727819013542324	0.45923343777155345	0.2847310163548881	0.13952960470928244	0.1114821295037694	0.45797990320600684	nan
mee-type_ddpm_maxabs_5.csv	logistic_regression_1	0.28604651162790695	0.029185814879095665	0.24980753603429406	0.32228548722151984	0.6488990466897444	0.05770243634485367	0.577252008871695	0.7205460845077938	nan
mee-type_ddpm_maxabs_5.csv	logistic_regression_2	0.20697674418604653	0.022366725653106215	0.17920478618488392	0.23474870218720914	0.4502114164904863	0.21702125239321693	0.18074394054873583	0.7196788924322368	nan
mee-type_ddpm_maxabs_5.csv	logistic_regression_3	0.2883720930232558	0.020800632348835262	0.2625446966958344	0.31419948935067715	0.651932177489633	0.059393997000262565	0.5781847897049844	0.7256795652742815	nan
mee-type_ddpm_maxabs_5.csv	logistic_regression_4	0.19302325581395346	0.01763459405593384	0.17112701525176227	0.21491949637614466	0.10783733527366804	0.023261413076313738	0.07895447610946295	0.13672019443787314	nan
mee-type_ddpm_maxabs_5.csv	logistic_regression_5	0.03488372093023256	0.0	0.03488372093023256	0.03488372093023256	0.001216873985938345	0.0	0.001216873985938345	0.001216873985938345	nan
mee-type_ddpm_maxabs_5.csv	logistic_regression_6	0.2395348837209302	0.045482807478158	0.18306051913806837	0.29600924830379205	0.498555799345813	0.22708961593241594	0.2165867988766117	0.7805247998150143	nan
mee-type_ddpm_maxabs_5.csv	random_forest_1	0.21162790697674422	0.04143844111908246	0.16017528649749294	0.2630805274559955	0.482198784035199	0.030320306739214622	0.4445511507426212	0.5198464173277768	nan
mee-type_ddpm_maxabs_5.csv	random_forest_2	0.21162790697674422	0.04143844111908246	0.16017528649749294	0.2630805274559955	0.482198784035199	0.030320306739214622	0.4445511507426212	0.5198464173277768	nan
mee-type_ddpm_maxabs_5.csv	random_forest_3	0.19534883720930232	0.06119859240437566	0.11936074828004259	0.2713369261385621	0.43138722711397126	0.1954368297711142	0.1887203516641007	0.6740541025638418	nan
mee-type_ddpm_maxabs_5.csv	random_forest_4	0.19534883720930232	0.06119859240437566	0.11936074828004259	0.2713369261385621	0.43138722711397126	0.1954368297711142	0.1887203516641007	0.6740541025638418	nan
mee-type_ddpm_maxabs_5.csv	random_forest_5	0.19069767441860463	0.07782883967758843	0.09406040616897025	0.287334942668239	0.48562276073219984	0.034103315844447764	0.44327790122877697	0.5279676202356227	nan
mee-type_ddpm_maxabs_5.csv	xgboost	0.20465116279069767	0.05672702752395567	0.13421525498908776	0.2750870705923076	0.43774816582215414	0.07711357543325717	0.3419990154339083	0.5334973162104	0.06229368593281694
mee-type_ddpm_maxabs_5.csv	mlp_1	0.1813953488372093	0.061308959657972395	0.1052702208625779	0.25752047681184076	0.41085066096694006	0.24587200118787939	0.10556024892563654	0.7161410730082436	nan
mee-type_ddpm_maxabs_5.csv	mlp_2	0.20930232558139533	0.05696487773914368	0.13857108773062146	0.28003356343216923	0.3255242758057936	0.25596729144546754	0.0076989053002256	0.6433496463113615	nan
mee-type_ddpm_maxabs_5.csv	mlp_3	0.14186046511627906	0.03621491047069171	0.09689371458664855	0.18682721564590957	0.2298681163797443	0.21981034852704576	-0.043062479818910704	0.5027987125783993	nan
mee-type_ddpm_maxabs_5.csv	mlp_4	0.17906976744186048	0.02266696359257899	0.15092501480035964	0.20721452008336133	0.22315862109466758	0.15403039017474499	0.03190463098540758	0.4144126112039276	nan
mee-type_ddpm_maxabs_5.csv	mlp_5	0.06744186046511627	0.030098090943127407	0.030070144526372126	0.10481357640386041	0.16629737555748958	0.18086055219339198	-0.0582706607962985	0.39086541191127766	nan
mee-type_ddpm_maxabs_5.csv	mlp_6	0.1186046511627907	0.06649292304881767	0.03604278247774037	0.20116651984784104	0.20368444362618793	0.17975973228706688	-0.01951674428141023	0.4268856315337861	nan
mee-type_ddpm_maxabs_5.csv	mlp_7	0.07441860465116279	0.03546035042320211	0.030388764166983044	0.11844844513534253	0.026414974521824286	0.018078222117537512	0.003967896966946896	0.048862052076701676	nan
mee-type_ddpm_maxabs_5.csv	mlp_8	0.12790697674418602	0.08303986544817267	0.024799365401505152	0.2310145880868669	0.26762965829644336	0.24187848230545575	-0.03270214512240782	0.5679614617152946	nan
mee-type_ddpm_maxabs_5.csv	mlp_9	0.29534883720930233	0.081229066030572	0.19448963031142452	0.39620804410718014	0.5817858498091055	0.09656615557806314	0.4618831309828807	0.7016885686353304	nan
mee-type_ddpm_maxabs_5.csv	mlp_10	0.32093023255813957	0.046220016079887884	0.2635405025953436	0.3783199625209355	0.5646021801955454	0.03529657967465303	0.5207756879537979	0.6084286724372929	nan
mee-type_ddpm_maxabs_5.csv	mlp_11	0.19534883720930232	0.084412518199449	0.09053685236332627	0.3001608220552784	0.3192986083683758	0.1909004492825307	0.0822643932533334	0.5563328234834182	nan
mee-type_ddpm_maxabs_5.csv	mlp_12	0.2581395348837209	0.04751817846907572	0.1991379234184482	0.3171411463489936	0.43043209697279466	0.23350978993192534	0.1404913975861986	0.7203727963593907	nan
mee-type_flow_maxabs_100.csv	SVM_rbf_1	0.38461538461538464	0.0	0.38461538461538464	0.38461538461538464	0.14792899408284024	0.0	0.14792899408284024	0.14792899408284024	nan
mee-type_flow_maxabs_100.csv	SVM_rbf_2	0.17362637362637362	0.19260573450731117	-0.0655252327589475	0.41277798001169475	0.059823692790725747	0.08042876825580027	-0.04004181317237539	0.15968919875382687	nan
mee-type_flow_maxabs_100.csv	SVM_rbf_3	0.38461538461538464	0.0	0.38461538461538464	0.38461538461538464	0.14792899408284024	0.0	0.14792899408284024	0.14792899408284024	nan
mee-type_flow_maxabs_100.csv	SVM_rbf_4	0.38461538461538464	0.0	0.38461538461538464	0.38461538461538464	0.14792899408284024	0.0	0.14792899408284024	0.14792899408284024	nan
mee-type_flow_maxabs_100.csv	SVM_rbf_5	0.3230769230769231	0.062453943904979436	0.24553010938427258	0.40062373676957364	0.4100556705783859	0.04207745102729631	0.35780961450161	0.4623017266551618	nan
mee-type_flow_maxabs_100.csv	SVM_rbf_6	0.38461538461538464	0.0	0.38461538461538464	0.38461538461538464	0.14792899408284024	0.0	0.14792899408284024	0.14792899408284024	nan
mee-type_flow_maxabs_100.csv	logistic_regression_1	0.5934065934065934	0.015540808377726343	0.5741101311409871	0.6127030556721997	0.6676906110156728	0.0639992436559716	0.5882250542557821	0.7471561677755636	nan
mee-type_flow_maxabs_100.csv	logistic_regression_2	0.5252747252747253	0.004914435115384135	0.5191726481204444	0.5313768024290062	0.48466183982769556	0.01404951471257726	0.46721706321685424	0.5021066164385369	nan
mee-type_flow_maxabs_100.csv	logistic_regression_3	0.5912087912087912	0.029486610692304904	0.554596328283106	0.6278212541344764	0.7799713513999229	0.054093961211359294	0.7128048272435471	0.8471378755562987	nan
mee-type_flow_maxabs_100.csv	logistic_regression_4	0.5560439560439561	0.00982887023076827	0.5438398017353944	0.5682481103525178	0.6153654783519038	0.044856284877453696	0.5596690443263975	0.6710619123774101	nan
mee-type_flow_maxabs_100.csv	logistic_regression_5	0.4395604395604396	6.206335383118183e-17	0.43956043956043955	0.43956043956043966	0.3278657616892911	0.0	0.3278657616892911	0.3278657616892911	nan
mee-type_flow_maxabs_100.csv	logistic_regression_6	0.421978021978022	0.06482585144506649	0.3414860960857773	0.5024699478702667	0.6811988544522277	0.047327071264904666	0.6224345339221716	0.7399631749822838	nan
mee-type_flow_maxabs_100.csv	random_forest_1	0.3626373626373626	0.03726554935783114	0.3163660716264582	0.40890865364826706	0.5122623469326766	0.05079628235779092	0.4491904318864145	0.5753342619789387	nan
mee-type_flow_maxabs_100.csv	random_forest_2	0.3626373626373626	0.03387040660971965	0.3205816981455508	0.40469302712917443	0.5118887522733676	0.047478342702697365	0.45293660344504777	0.5708409011016874	nan
mee-type_flow_maxabs_100.csv	random_forest_3	0.34725274725274724	0.04007600555782521	0.29749181395978164	0.39701368054571284	0.5078950985091903	0.02795781531171042	0.4731808857682095	0.5426093112501712	nan
mee-type_flow_maxabs_100.csv	random_forest_4	0.34725274725274724	0.04007600555782521	0.29749181395978164	0.39701368054571284	0.5082003488144407	0.02814758684897443	0.4732505035877553	0.543150194041126	nan
mee-type_flow_maxabs_100.csv	random_forest_5	0.3868131868131869	0.023823608119427245	0.35723227030397914	0.4163941033223946	0.568114907070951	0.040570781071077526	0.5177396288359872	0.6184901853059148	nan
mee-type_flow_maxabs_100.csv	xgboost	0.26593406593406593	0.04688072309384954	0.20772395985867306	0.3241441720094588	0.5116898669096471	0.03491294112435566	0.468339724844127	0.5550400089751673	0.05605568944638804
mee-type_flow_maxabs_100.csv	mlp_1	0.4329670329670329	0.07355252980519347	0.3416395047311147	0.5242945612029511	0.5328151644987525	0.07653815855770545	0.43778048852883816	0.6278498404686669	nan
mee-type_flow_maxabs_100.csv	mlp_2	0.45494505494505494	0.07231069835763561	0.3651594641094066	0.5447306457807033	0.5467973556307969	0.030013784733620753	0.5095303196772222	0.5840643915843716	nan
mee-type_flow_maxabs_100.csv	mlp_3	0.3142857142857143	0.10950481906244494	0.1783175228260589	0.45025390574536966	0.47051736247507864	0.09402976099643837	0.35376399348609644	0.5872707314640608	nan
mee-type_flow_maxabs_100.csv	mlp_4	0.4373626373626374	0.03838296526719335	0.3897038912460578	0.485021383479217	0.5320757975042649	0.04759970976315372	0.4729729515664086	0.5911786434421212	nan
mee-type_flow_maxabs_100.csv	mlp_5	0.23296703296703294	0.07096212875148546	0.14485591246041307	0.3210781534736528	0.3846347191944358	0.018987548038247273	0.3610585643811796	0.408210874007692	nan
mee-type_flow_maxabs_100.csv	mlp_6	0.2549450549450549	0.0981042378930358	0.13313255468205465	0.3767575552080552	0.39161785870338184	0.04367147216209899	0.33739256397114553	0.44584315343561814	nan
mee-type_flow_maxabs_100.csv	mlp_7	0.3868131868131868	0.07222715044024168	0.29713133441869144	0.4764950392076822	0.3125791494962522	0.07658058338952226	0.21749179614004105	0.40766650285246336	nan
mee-type_flow_maxabs_100.csv	mlp_8	0.44835164835164837	0.02623590414574357	0.41577547071355364	0.4809278259897431	0.3443199638825899	0.04883964548160804	0.28367753440304194	0.40496239336213785	nan
mee-type_flow_maxabs_100.csv	mlp_9	0.4043956043956044	0.06611696244611572	0.3223005524556721	0.48649065633553673	0.5752391871140641	0.06392708932025261	0.4958632217951499	0.6546151524329782	nan
mee-type_flow_maxabs_100.csv	mlp_10	0.4813186813186814	0.0742876649721124	0.3890783622121864	0.5735590004251764	0.6432897261468691	0.05274901402133785	0.5777931744958282	0.7087862777979099	nan
mee-type_flow_maxabs_100.csv	mlp_11	0.23516483516483516	0.11276460248233233	0.09514908799076402	0.3751805823389063	0.5490179527509845	0.04224911923067969	0.49655874244643117	0.6014771630555379	nan
mee-type_flow_maxabs_100.csv	mlp_12	0.21318681318681318	0.08603771046621268	0.1063568856130375	0.32001674076058884	0.5259178916321774	0.07403346358280738	0.4339932052390758	0.617842578025279	nan
mee-type_flow_maxabs_1000.csv	SVM_rbf_1	0.38461538461538464	0.0	0.38461538461538464	0.38461538461538464	0.14792899408284024	0.0	0.14792899408284024	0.14792899408284024	nan
mee-type_flow_maxabs_1000.csv	SVM_rbf_2	0.410989010989011	0.009828870230768321	0.3987848566804493	0.4231931652975728	0.189173328782586	0.008501938021108843	0.17861677842681536	0.19972987913835663	nan
mee-type_flow_maxabs_1000.csv	SVM_rbf_3	0.38461538461538464	0.0	0.38461538461538464	0.38461538461538464	0.14792899408284024	0.0	0.14792899408284024	0.14792899408284024	nan
mee-type_flow_maxabs_1000.csv	SVM_rbf_4	0.38461538461538464	0.0	0.38461538461538464	0.38461538461538464	0.14792899408284024	0.0	0.14792899408284024	0.14792899408284024	nan
mee-type_flow_maxabs_1000.csv	SVM_rbf_5	0.3758241758241758	0.05235661208602898	0.31081485552903343	0.4408334961193182	0.2935934635220979	0.0954611230095848	0.17506282385299526	0.4121241031912006	nan
mee-type_flow_maxabs_1000.csv	SVM_rbf_6	0.38461538461538464	0.0	0.38461538461538464	0.38461538461538464	0.14792899408284024	0.0	0.14792899408284024	0.14792899408284024	nan
mee-type_flow_maxabs_1000.csv	logistic_regression_1	0.14725274725274726	0.16567551358008265	-0.05846057334356056	0.35296606784905504	0.16612647465182026	0.22227336032328027	-0.10986235462137037	0.44211530392501086	nan
mee-type_flow_maxabs_1000.csv	logistic_regression_2	0.05714285714285714	0.0049144351153841545	0.051040779988576264	0.06324493429713803	0.003737491282335751	0.0014536133782144984	0.001932591883299453	0.0055423906813720485	nan
mee-type_flow_maxabs_1000.csv	logistic_regression_3	0.06813186813186814	0.023823608119427252	0.03855095162266038	0.0977127846410759	0.08066907121672683	0.17174536549936445	-0.13258096598218128	0.2939191084156349	nan
mee-type_flow_maxabs_1000.csv	logistic_regression_4	0.0945054945054945	0.0731409287573351	0.0036890364723249497	0.18532195253866407	0.23159219900978142	0.20876059689078283	-0.027618318393032776	0.49080271641259565	nan
mee-type_flow_maxabs_1000.csv	logistic_regression_5	0.08791208791208793	0.0677408132194393	0.003800758928464376	0.1720234168957115	0.1639114975378712	0.22069658000260947	-0.11011950037806628	0.4379424954538087	nan
mee-type_flow_maxabs_1000.csv	logistic_regression_6	0.07032967032967033	0.014743305346152464	0.0520234388668277	0.08863590179251296	0.23393556992458087	0.21080260504967535	-0.027810435493168473	0.4956815753423302	nan
mee-type_flow_maxabs_1000.csv	random_forest_1	0.43076923076923085	0.02113778468315533	0.40452320452637386	0.45701525701208784	0.5641992278352977	0.041829986830704095	0.5122604391422748	0.6161380165283207	nan
mee-type_flow_maxabs_1000.csv	random_forest_2	0.43516483516483523	0.01996252980723622	0.41037808059012043	0.45995158973955	0.5644190080550779	0.043882928342907544	0.509931155795934	0.6189068603142219	nan
mee-type_flow_maxabs_1000.csv	random_forest_3	0.43076923076923085	0.040674187963344516	0.380265555918973	0.4812729056194887	0.5564454857312	0.02781012674188988	0.5219146525703116	0.5909763188920885	nan
mee-type_flow_maxabs_1000.csv	random_forest_4	0.42857142857142866	0.0453088530287655	0.3723130569657048	0.4848298001771525	0.5342101813530384	0.028989637284415712	0.49821479241599387	0.570205570290083	nan
mee-type_flow_maxabs_1000.csv	random_forest_5	0.45274725274725275	0.05059720629987402	0.38992252327501037	0.5155719822194951	0.5626939726939726	0.04346677257409616	0.5087228460706066	0.6166650993173386	nan
mee-type_flow_maxabs_1000.csv	xgboost	0.2857142857142857	0.03475030395789427	0.24256608436313054	0.32886248706544086	0.545081804000254	0.049528582756356805	0.48358394590962983	0.6065796620908781	0.054763052987535366
mee-type_flow_maxabs_1000.csv	mlp_1	0.43516483516483523	0.1116885797562366	0.29648514667100623	0.5738445236586642	0.5059983692239671	0.02994763373790292	0.4688134705802206	0.5431832678677136	nan
mee-type_flow_maxabs_1000.csv	mlp_2	0.5164835164835165	0.07770404188863161	0.4200012051554853	0.6129658278115478	0.6122595846580557	0.08039342688941471	0.5124379607972429	0.7120812085188686	nan
mee-type_flow_maxabs_1000.csv	mlp_3	0.36923076923076925	0.11168857975623658	0.23055108073694028	0.5079104577245982	0.44746839772539876	0.0455893548354429	0.3908617371248925	0.504075058325905	nan
mee-type_flow_maxabs_1000.csv	mlp_4	0.2483516483516483	0.1020854871428008	0.12159577422733905	0.3751075224759576	0.4974025883965033	0.062205563476945565	0.4201641797392009	0.5746409970538058	nan
mee-type_flow_maxabs_1000.csv	mlp_5	0.210989010989011	0.04752032595701022	0.15198473306528346	0.26999328891273855	0.3798118375758127	0.044686426630999115	0.3243263104197271	0.43529736473189834	nan
mee-type_flow_maxabs_1000.csv	mlp_6	0.27692307692307694	0.11509644811231791	0.13401196098088394	0.4198341928652699	0.3674496996174518	0.021936723704570685	0.3402116595549432	0.39468773967996035	nan
mee-type_flow_maxabs_1000.csv	mlp_7	0.27252747252747256	0.05235661208602899	0.20751815223233017	0.33753679282261495	0.3231706534541124	0.03428320268099823	0.28060243494199405	0.3657388719662307	nan
mee-type_flow_maxabs_1000.csv	mlp_8	0.3582417582417582	0.039315480923073215	0.3094251410075112	0.4070583754760052	0.3413716621816451	0.0686194096592295	0.25616941162978407	0.42657391273350614	nan
mee-type_flow_maxabs_1000.csv	mlp_9	0.3384615384615385	0.038382965267193356	0.29080279234495887	0.3861202845781181	0.5639742413784962	0.07926693912366334	0.46555133682083377	0.6623971459361585	nan
mee-type_flow_maxabs_1000.csv	mlp_10	0.2417582417582418	0.12212148775215863	0.0901243870093042	0.3933920965071794	0.4577051832878901	0.116098693645888	0.3135496151493026	0.6018607514264777	nan
mee-type_flow_maxabs_1000.csv	mlp_11	0.14725274725274726	0.09343890843728049	0.031233018614717917	0.2632724758907766	0.423643997511672	0.04705774114373217	0.3652140944967076	0.48207390052663635	nan
mee-type_flow_maxabs_1000.csv	mlp_12	0.14065934065934066	0.05059720629987401	0.0778346111870983	0.20348407013158304	0.3149904825829366	0.0753862623507976	0.2213860746628072	0.408594890503066	nan
mee-type_flow_maxabs_10000.csv	SVM_rbf_1	0.38461538461538464	0.0	0.38461538461538464	0.38461538461538464	0.14792899408284024	0.0	0.14792899408284024	0.14792899408284024	nan
mee-type_flow_maxabs_10000.csv	SVM_rbf_2	0.39780219780219783	0.029486610692304918	0.36118973487651257	0.4344146607278831	0.18140968304206226	0.07486509644634716	0.08845238806258025	0.27436697802154425	nan
mee-type_flow_maxabs_10000.csv	SVM_rbf_3	0.38461538461538464	0.0	0.38461538461538464	0.38461538461538464	0.14792899408284024	0.0	0.14792899408284024	0.14792899408284024	nan
mee-type_flow_maxabs_10000.csv	SVM_rbf_4	0.2065934065934066	0.1570313905749121	0.011613182328663985	0.40157363085814923	0.21517083003274715	0.1566129259569795	0.02071019821861353	0.40963146184688076	nan
mee-type_flow_maxabs_10000.csv	SVM_rbf_5	0.4	0.07104716428678952	0.3117832939306251	0.48821670606937495	0.4041485147766264	0.05958331571096556	0.33016605676471156	0.4781309727885412	nan
mee-type_flow_maxabs_10000.csv	SVM_rbf_6	0.38461538461538464	0.0	0.38461538461538464	0.38461538461538464	0.14792899408284024	0.0	0.14792899408284024	0.14792899408284024	nan
mee-type_flow_maxabs_10000.csv	logistic_regression_1	0.03076923076923077	0.004914435115384153	0.024667153614949894	0.03687130792351165	0.0018767862174455577	0.0017664063944947618	-0.00031649700879550794	0.004070069443686623	nan
mee-type_flow_maxabs_10000.csv	logistic_regression_2	0.03076923076923077	0.004914435115384153	0.024667153614949894	0.03687130792351165	0.0025832226381676928	0.003346046253011096	-0.0015714425305207967	0.006737887806856182	nan
mee-type_flow_maxabs_10000.csv	logistic_regression_3	0.02857142857142857	0.009828870230768307	0.01636727426286682	0.04077558287999032	0.0012690606097199501	0.00040749062395293174	0.0007630941723520054	0.001775027047087895	nan
mee-type_flow_maxabs_10000.csv	logistic_regression_4	0.0989010989010989	0.14743305346152458	-0.08416121572732736	0.28196341352952514	0.08537370240666944	0.18847118690520204	-0.1486441850722531	0.319391589885592	nan
mee-type_flow_maxabs_10000.csv	logistic_regression_5	0.07912087912087912	0.10320313742306722	-0.0490227411190193	0.20726449936077754	0.07228394316306404	0.15920159542739418	-0.12539094633573267	0.26995883266186077	nan
mee-type_flow_maxabs_10000.csv	logistic_regression_6	0.0923076923076923	0.13268974811537212	-0.07244839085789133	0.2570637754732759	0.09033350493732217	0.19956164251871705	-0.1574550020005788	0.33812201187522317	nan
mee-type_flow_maxabs_10000.csv	random_forest_1	0.34285714285714286	0.036776264902596736	0.2971933787391837	0.388520906975102	0.4537608177338651	0.01952356221782705	0.429519113411298	0.47800252205643223	nan
mee-type_flow_maxabs_10000.csv	random_forest_3	0.3186813186813186	0.019033525357899754	0.29504807548551604	0.34231456187712117	0.43018453334043116	0.04222076515570528	0.3777605292699759	0.48260853741088644	nan
mee-type_flow_maxabs_10000.csv	random_forest_5	0.35384615384615387	0.060389589732017974	0.2788625744096113	0.4288297332826964	0.47705787367448893	0.049733239960893086	0.4153059001010191	0.5388098472479588	nan
mee-type_flow_maxabs_10000.csv	xgboost	0.210989010989011	0.0435420060574922	0.15692446965785262	0.26505355232016936	0.4522532150389293	0.03421859510056327	0.40976521743344807	0.4947412126444105	0.05270215945132265
mee-type_flow_maxabs_10000.csv	mlp_1	0.3956043956043956	0.08223422828074597	0.2934971149281233	0.49771167628066787	0.4394248127087579	0.05293125467215555	0.3737019794025874	0.5051476460149283	nan
mee-type_flow_maxabs_10000.csv	mlp_2	0.39120879120879126	0.06482585144506649	0.3107168653165466	0.47170071710103595	0.4532849648517397	0.039249066711741276	0.40455081175267266	0.5020191179508067	nan
mee-type_flow_maxabs_10000.csv	mlp_3	0.3054945054945055	0.05783603238215722	0.23368158628663366	0.3773074247023774	0.3614601961285969	0.04851213046055534	0.301224430259561	0.4216959619976328	nan
mee-type_flow_maxabs_10000.csv	mlp_4	0.33186813186813185	0.06519734933710473	0.2509149304179347	0.412821333318329	0.36678433695563617	0.04270047082490165	0.3137646996260055	0.41980397428526683	nan
mee-type_flow_maxabs_10000.csv	mlp_5	0.23296703296703294	0.054058786269225695	0.1658441842699433	0.3000898816641226	0.3833634799601186	0.02220677028701937	0.35579013277834554	0.41093682714189167	nan
mee-type_flow_maxabs_10000.csv	mlp_6	0.22637362637362637	0.04436621810590407	0.1712856906150692	0.28146156213218354	0.32724636187369105	0.039411586462741045	0.27831041385081057	0.37618230989657153	nan
mee-type_flow_maxabs_10000.csv	mlp_7	0.2021978021978022	0.09440321580182212	0.08498072782201876	0.31941487657358564	0.30066324626764185	0.07334784763193344	0.2095898645173347	0.391736628017949	nan
mee-type_flow_maxabs_10000.csv	mlp_8	0.29890109890109884	0.032412925722533244	0.2586551359549765	0.33914706184722115	0.3084763836439207	0.03526352106408129	0.2646909390887508	0.35226182819909063	nan
mee-type_flow_maxabs_10000.csv	mlp_9	0.21538461538461537	0.05304403686218535	0.14952174449344635	0.2812474862757844	0.3998166562974991	0.0884784183773932	0.2899561895802794	0.5096771230147187	nan
mee-type_flow_maxabs_10000.csv	mlp_10	0.13186813186813187	0.06018929203353474	0.057133254872719016	0.2066030088635447	0.26849113279882514	0.14613836017204118	0.0870363922166664	0.4499458733809839	nan
mee-type_flow_maxabs_10000.csv	mlp_11	0.13406593406593406	0.09305038738468813	0.018528618031452893	0.24960325010041523	0.2831139758345672	0.17872793604769985	0.061193932170873155	0.5050340194982612	nan
mee-type_flow_maxabs_10000.csv	mlp_12	0.08791208791208792	0.03296703296703296	0.04697810994932639	0.12884606587484945	0.29896736207544666	0.08823727761338597	0.18940631116339413	0.4085284129874992	nan
mee-type_gan_maxabs_100.csv	SVM_rbf_1	0.04772727272727273	0.018672359914948845	0.024542475659377606	0.07091206979516786	0.006807495199958662	0.010293923210564122	-0.005974098650872937	0.01958908905079026	nan
mee-type_gan_maxabs_100.csv	SVM_rbf_2	0.045454545454545456	0.0	0.045454545454545456	0.045454545454545456	0.013407840320872142	0.02340473952756505	-0.01565298213784201	0.042468662779586296	nan
mee-type_gan_maxabs_100.csv	SVM_rbf_3	0.045454545454545456	0.036822390331862846	-0.00026649094833508524	0.091175581857426	0.0038764662881287477	0.005261740346245306	-0.0026568472677002694	0.010409779843957766	nan
mee-type_gan_maxabs_100.csv	SVM_rbf_4	0.03636363636363636	0.012448239943299228	0.020907104985039615	0.05182016774223311	0.006212320417094416	0.008692489567949246	-0.0045808309341899755	0.017005471768378806	nan
mee-type_gan_maxabs_100.csv	SVM_rbf_5	0.05227272727272728	0.015245918028407655	0.03334241973728775	0.07120303480816681	0.03702838563832221	0.04285167431960054	-0.016178995627078654	0.09023576690372308	nan
mee-type_gan_maxabs_100.csv	SVM_rbf_6	0.03636363636363636	0.009507500301523588	0.024558515526323068	0.04816875720094965	0.006065418793852994	0.00865407879954835	-0.004680039289164662	0.01681087687687065	nan
mee-type_gan_maxabs_100.csv	logistic_regression_1	0.17954545454545454	0.03446761565477978	0.13674825708298993	0.22234265200791914	0.4400974025974026	0.020024240793472297	0.41523402371278484	0.46496078148202036	nan
mee-type_gan_maxabs_100.csv	logistic_regression_2	0.10227272727272727	0.019682395540555425	0.07783380533161323	0.1267116492138413	0.41119769119769123	0.006241468651987694	0.4034478842766007	0.41894749811878174	nan
mee-type_gan_maxabs_100.csv	logistic_regression_3	0.16363636363636364	0.036470014854275486	0.11835285917785318	0.2089198680948741	0.44133116883116885	0.018911598341890108	0.41784931802155384	0.46481301964078386	nan
mee-type_gan_maxabs_100.csv	logistic_regression_4	0.09772727272727275	0.07078368864726108	0.009837714873904002	0.1856168305806415	0.416511544011544	0.007920376660176977	0.4066770974603889	0.4263459905626991	nan
mee-type_gan_maxabs_100.csv	logistic_regression_5	0.075	0.04297197818452054	0.021643241756683196	0.1283567582433168	0.35737437278630463	0.17564565709075194	0.13928148393587383	0.5754672616367354	nan
mee-type_gan_maxabs_100.csv	logistic_regression_6	0.1659090909090909	0.033709993123162106	0.12405260606836396	0.20776557574981783	0.44120129870129865	0.019030878306006544	0.41757134225453324	0.46483125514806406	nan
mee-type_gan_maxabs_100.csv	random_forest_1	0.04318181818181818	0.023288524468089995	0.014265295778503315	0.07209834058513305	0.4281502525252526	0.025378968477672927	0.3966381010549779	0.45966240399552727	nan
mee-type_gan_maxabs_100.csv	random_forest_2	0.04318181818181818	0.03446761565477978	0.00038462071935359277	0.08597901564428277	0.4268434343434343	0.03857520577206436	0.3789459901129599	0.47474087857390873	nan
mee-type_gan_maxabs_100.csv	random_forest_3	0.05681818181818181	0.017967486705502154	0.034508600437754985	0.07912776319860863	0.44411796536796533	0.03158579379835483	0.4048990223538603	0.48333690838207033	nan
mee-type_gan_maxabs_100.csv	random_forest_4	0.05	0.017233807827389886	0.02860140126876771	0.07139859873123229	0.3548513986013986	0.17202227495426262	0.14125753290158125	0.5684452643012159	nan
mee-type_gan_maxabs_100.csv	random_forest_5	0.04090909090909091	0.010163945352271771	0.028288885885464552	0.05352929593271727	0.43259761072261077	0.026816303212246092	0.39930077245904877	0.46589444898617277	nan
mee-type_gan_maxabs_100.csv	xgboost	0.06363636363636363	0.023564137901508776	0.03437762195535133	0.09289510531737594	0.19538490549854187	0.21084780562624342	-0.06641722384783011	0.45718703484491385	0.06472356597452847
mee-type_gan_maxabs_100.csv	mlp_1	0.06590909090909092	0.02328852446809	0.03699256850577605	0.09482561331240578	0.25743579292710306	0.20668630747851555	0.0008008460093564262	0.5140707398448496	nan
mee-type_gan_maxabs_100.csv	mlp_2	0.14318181818181816	0.023564137901508773	0.11392307650080587	0.17244055986283047	0.3263986770804953	0.23423319361061332	0.03555975338990425	0.6172376007710864	nan
mee-type_gan_maxabs_100.csv	mlp_3	0.09318181818181817	0.03049183605681531	0.055321203110939104	0.13104243325269724	0.1060471313929812	0.05577394546733116	0.036794631268415964	0.17529963151754646	nan
mee-type_gan_maxabs_100.csv	mlp_4	0.1477272727272727	0.0331304084934392	0.10659043725518497	0.18886410819936045	0.18799741924741925	0.0468476236101256	0.12982841160932554	0.24616642688551296	nan
mee-type_gan_maxabs_100.csv	mlp_5	0.03409090909090909	0.022727272727272728	0.005871272768096215	0.06231054541372196	0.013747459451318927	0.022234329859194435	-0.013860107459029825	0.04135502636166768	nan
mee-type_gan_maxabs_100.csv	mlp_6	0.025	0.0282952263590653	-0.010133163891077622	0.060133163891077625	0.02126463195248774	0.02937202335284388	-0.01520555199913879	0.05773481590411427	nan
mee-type_gan_maxabs_100.csv	mlp_7	0.025	0.018672359914948842	0.0018152029321048813	0.04818479706789512	0.019583560379014923	0.025145931543960245	-0.011639237520416967	0.05080635827844682	nan
mee-type_gan_maxabs_100.csv	mlp_8	0.02954545454545454	0.010163945352271771	0.016925249521828185	0.0421656595690809	0.03595842882607588	0.03145116160595216	-0.0030933462417234714	0.07501020389387524	nan
mee-type_gan_maxabs_100.csv	mlp_9	0.09318181818181819	0.032540502416537165	0.05277744784774132	0.13358618851589504	0.27731533551509624	0.2262639691630995	-0.0036284890854115792	0.5582591601156041	nan
mee-type_gan_maxabs_100.csv	mlp_10	0.10454545454545454	0.023288524468089995	0.07562893214213967	0.1334619769487694	0.18144586878638602	0.18369719814785668	-0.04664432872471122	0.4095360662974833	nan
mee-type_gan_maxabs_100.csv	mlp_11	0.034090909090909095	0.019682395540555425	0.009651987149795063	0.058529831032023125	0.04836760461760462	0.05225208944198604	-0.016511933673432573	0.11324714290864182	nan
mee-type_gan_maxabs_100.csv	mlp_12	0.043181818181818175	0.025913077843162224	0.011006482341311935	0.07535715402232442	0.2228219696969697	0.231502523100517	-0.06462637873027804	0.5102703181242174	nan
mee-type_gan_maxabs_1000.csv	SVM_rbf_1	0.028571428571428574	0.016665660316596814	0.007878278150017126	0.04926457899284002	0.3862769760174876	0.0015039615317686036	0.38440956112880714	0.3881443909061681	nan
mee-type_gan_maxabs_1000.csv	SVM_rbf_2	0.13846153846153847	0.022787298190470026	0.110167370682098	0.16675570624097893	0.394021779966596	0.0067275195968932435	0.38566846108592334	0.40237509884726863	nan
mee-type_gan_maxabs_1000.csv	SVM_rbf_3	0.04175824175824176	0.0049144351153841545	0.035656164603960885	0.04786031891252264	0.002585413467873452	0.00023925425309749573	0.0022883400753851597	0.0028824868603617446	nan
mee-type_gan_maxabs_1000.csv	SVM_rbf_4	0.026373626373626374	0.012529400275814704	0.010816321132062913	0.041930931615189834	0.3862544871753434	0.0012517895436141453	0.38470018516570975	0.387808789184977	nan
mee-type_gan_maxabs_1000.csv	SVM_rbf_5	0.1846153846153846	0.0406741879633445	0.13411170976512676	0.23511905946564243	0.3649398535361629	0.021375541225451655	0.33839861355439915	0.3914810935179266	nan
mee-type_gan_maxabs_1000.csv	SVM_rbf_6	0.039560439560439566	0.006018929203353476	0.03208695186089828	0.04703392725998085	0.00260900823620915	0.00032318946624025597	0.002207715511379932	0.0030103009610383674	nan
mee-type_gan_maxabs_1000.csv	logistic_regression_1	0.008791208791208791	0.004914435115384154	0.002689131636927915	0.014893285945489668	0.0012977498691784405	0.0008168965793999225	0.00028343879628175235	0.0023120609420751287	nan
mee-type_gan_maxabs_1000.csv	logistic_regression_2	0.008791208791208791	0.004914435115384154	0.002689131636927915	0.014893285945489668	0.0012977498691784405	0.0008168965793999225	0.00028343879628175235	0.0023120609420751287	nan
mee-type_gan_maxabs_1000.csv	logistic_regression_3	0.008791208791208791	0.004914435115384154	0.002689131636927915	0.014893285945489668	0.0012977498691784405	0.0008168965793999225	0.00028343879628175235	0.0023120609420751287	nan
mee-type_gan_maxabs_1000.csv	logistic_regression_4	0.008791208791208791	0.004914435115384154	0.002689131636927915	0.014893285945489668	0.0013310499024784738	0.0008469352854985605	0.00027944084966648273	0.002382658955290465	nan
mee-type_gan_maxabs_1000.csv	logistic_regression_5	0.017582417582417582	0.006018929203353474	0.010108929882876297	0.02505590528195887	0.0025854870218365166	0.0011889937550638753	0.0011091562820845955	0.004061817761588438	nan
mee-type_gan_maxabs_1000.csv	logistic_regression_6	0.008791208791208791	0.004914435115384154	0.002689131636927915	0.014893285945489668	0.0013310499024784738	0.0008469352854985605	0.00027944084966648273	0.002382658955290465	nan
mee-type_gan_maxabs_1000.csv	random_forest_1	0.08571428571428572	0.02252077091419692	0.05775105525833288	0.11367751617023855	0.3214904143475572	0.11244880857526972	0.18186677709873783	0.4611140515963766	nan
mee-type_gan_maxabs_1000.csv	random_forest_2	0.05494505494505495	0.04662242513317896	-0.0029443318517638067	0.11283444174187371	0.1953898482469911	0.11796639320559733	0.0489152248056515	0.3418644716883307	nan
mee-type_gan_maxabs_1000.csv	random_forest_3	0.06593406593406595	0.013458734850457026	0.04922283940888311	0.08264529245924879	0.24129734734130337	0.11468543686728787	0.09889656926492107	0.38369812541768566	nan
mee-type_gan_maxabs_1000.csv	random_forest_4	0.05714285714285714	0.021137784683155327	0.03089683090000016	0.08338888338571412	0.21605442176870748	0.15436745377592165	0.0243819119207615	0.40772693161665347	nan
mee-type_gan_maxabs_1000.csv	random_forest_5	0.0879120879120879	0.04111711414037299	0.03685844757395176	0.13896572825022405	0.3072337613546405	0.11318854974011065	0.1666916141334488	0.44777590857583216	nan
mee-type_gan_maxabs_1000.csv	xgboost	0.07472527472527472	0.021137784683155324	0.04847924848241775	0.1009713009681317	0.31748684770662794	0.10950415231030373	0.181519484129102	0.45345421128415386	0.059107977603676386
mee-type_gan_maxabs_1000.csv	mlp_1	0.11208791208791209	0.10551739678380487	-0.018929240682720325	0.2431050648585445	0.19156321452922684	0.16879864254494115	-0.018027982864493197	0.4011544119229469	nan
mee-type_gan_maxabs_1000.csv	mlp_2	0.06813186813186814	0.014327917374071759	0.05034140895924499	0.08592232730449129	0.3122303480995188	0.10508647095553901	0.18174826041574024	0.44271243578329733	nan
mee-type_gan_maxabs_1000.csv	mlp_3	0.06153846153846154	0.01996252980723621	0.036751706963746765	0.08632521611317631	0.18129644165358452	0.1559189306511482	-0.012302481174375934	0.374895364481545	nan
mee-type_gan_maxabs_1000.csv	mlp_4	0.1098901098901099	0.0388520209443158	0.06164895422609427	0.15813126555412554	0.3136017830024907	0.11234462636120165	0.17410750505813277	0.4530960609468486	nan
mee-type_gan_maxabs_1000.csv	mlp_5	0.05714285714285714	0.03916160369495705	0.008517303722905371	0.10576841056280892	0.21920221390809624	0.19244334703795787	-0.019747761802769465	0.458152189618962	nan
mee-type_gan_maxabs_1000.csv	mlp_6	0.13846153846153847	0.08097641066787051	0.03791604463148024	0.2390070322915967	0.3796639044715968	0.06088493635837066	0.3040652709624804	0.4552625379807132	nan
mee-type_gan_maxabs_1000.csv	mlp_7	0.07252747252747252	0.03694007981092662	0.02666030533547114	0.1183946397194739	0.20691610772833896	0.12731680255180508	0.04883141763334517	0.3650007978233327	nan
mee-type_gan_maxabs_1000.csv	mlp_8	0.08351648351648351	0.042983752122215266	0.030145105998614072	0.13688786103435296	0.32987398294444187	0.11102820621061292	0.19201425650757997	0.46773370938130376	nan
mee-type_gan_maxabs_1000.csv	mlp_9	0.07032967032967033	0.012529400275814706	0.05477236508810687	0.08588697557123379	0.2604330834001164	0.075831261127827	0.16627613651930487	0.35459003028092795	nan
mee-type_gan_maxabs_1000.csv	mlp_10	0.06373626373626373	0.04140976633278411	0.012319247706815285	0.11515327976571219	0.19492500827904552	0.23368052710214574	-0.09522768930496833	0.48507770586305937	nan
mee-type_gan_maxabs_1000.csv	mlp_11	0.06373626373626373	0.018056787610060424	0.04131580063763987	0.08615672683488759	0.21128121268231154	0.13825486846646928	0.03961511993109945	0.3829473054335236	nan
mee-type_gan_maxabs_1000.csv	mlp_12	0.03956043956043956	0.02865583474814351	0.003979521215193266	0.07514135790568585	0.2112285333713905	0.2130819456620021	-0.05334764722432875	0.47580471396710977	nan
mee-type_gan_maxabs_10000.csv	SVM_rbf_1	0.04395604395604395	0.010989010989010988	0.030311384635123444	0.05760070327696446	0.024350182246109846	0.013469733991613993	0.007625298483341234	0.04107506600887846	nan
mee-type_gan_maxabs_10000.csv	SVM_rbf_2	0.06373626373626375	0.025058800551629408	0.032621653253136824	0.09485087421939067	0.031366318806525656	0.01695015048184704	0.010319927189079963	0.052412710423971345	nan
mee-type_gan_maxabs_10000.csv	SVM_rbf_3	0.04615384615384616	0.004914435115384151	0.04005176899956529	0.052255923308127034	0.031682640831247645	0.04217670886344238	-0.020686660127210453	0.08405194178970574	nan
mee-type_gan_maxabs_10000.csv	SVM_rbf_4	0.04175824175824176	0.00919406622564918	0.03034230072875199	0.05317418278773153	0.021239464469278133	0.009431433308743516	0.009528793278351481	0.032950135660204785	nan
mee-type_gan_maxabs_10000.csv	SVM_rbf_5	0.05934065934065934	0.016665660316596817	0.03864750891924788	0.08003380976207079	0.03369819370001276	0.012726597930802622	0.01789603522972059	0.04950035217030492	nan
mee-type_gan_maxabs_10000.csv	SVM_rbf_6	0.04615384615384616	0.004914435115384151	0.04005176899956529	0.052255923308127034	0.031975152212656635	0.042434733155278744	-0.0207145282196367	0.08466483264494998	nan
mee-type_gan_maxabs_10000.csv	logistic_regression_1	0.07472527472527472	0.004914435115384154	0.06862319757099385	0.0808273518795556	0.29885262637771	0.17195699008261855	0.08533982255264042	0.5123654302027796	nan
mee-type_gan_maxabs_10000.csv	logistic_regression_2	0.07472527472527472	0.004914435115384154	0.06862319757099385	0.0808273518795556	0.29885262637771	0.17195699008261855	0.08533982255264042	0.5123654302027796	nan
mee-type_gan_maxabs_10000.csv	logistic_regression_3	0.07472527472527472	0.004914435115384154	0.06862319757099385	0.0808273518795556	0.29885262637771	0.17195699008261855	0.08533982255264042	0.5123654302027796	nan
mee-type_gan_maxabs_10000.csv	logistic_regression_4	0.07472527472527472	0.004914435115384154	0.06862319757099385	0.0808273518795556	0.29921855921855933	0.17231527594306115	0.08526088473951274	0.5131762336976059	nan
mee-type_gan_maxabs_10000.csv	logistic_regression_5	0.07692307692307693	0.007770404188863161	0.0672748457902738	0.08657130805588005	0.30292818292818297	0.17535697602014466	0.08519373897008814	0.5206626268862777	nan
mee-type_gan_maxabs_10000.csv	logistic_regression_6	0.07472527472527472	0.004914435115384154	0.06862319757099385	0.0808273518795556	0.2991362743536657	0.17219049028395864	0.08533354173501881	0.5129390069723125	nan
mee-type_gan_maxabs_10000.csv	random_forest_1	0.04175824175824176	0.014327917374071754	0.023967782585618616	0.05954870093086491	0.13098465027036454	0.04345999333799044	0.07702194118040628	0.1849473593603228	nan
mee-type_ddpm_maxabs_5.csv	logistic_l2_1	0.43488372093023253	0.06859479629652382	0.34971203190471783	0.5200554099557472	0.6125574664733351	0.06148198900538795	0.5362174941873851	0.6888974387592851	0.05318684400757849
mee-type_ddpm_maxabs_5.csv	logistic_l2_2	0.26279069767441865	0.03994317217980852	0.21319469880469616	0.31238669654414114	0.6195804389409041	0.055694312455550815	0.550426816260135	0.6887340616216732	0.060418306343985415
mee-type_ddpm_maxabs_5.csv	logistic_l2_3	0.47441860465116276	0.05894786909598406	0.40122515782385093	0.5476120514784746	0.5915189128270523	0.039968460608646124	0.541891514225671	0.6411463114284336	0.04629908534660576
mee-type_ddpm_maxabs_5.csv	logistic_l1_1	0.22093023255813954	0.011627906976744179	0.2064922790906539	0.23536818602562518	0.1935798007692731	0.16849646279917885	-0.015636190913147496	0.4027957924516937	0.057247212416581705
mee-type_ddpm_maxabs_5.csv	logistic_l1_2	0.03255813953488372	0.04303896633330639	-0.02088179548108679	0.08599807455085423	0.0025419145484045433	0.004727843080030669	-0.003328477993226348	0.008412307090035435	0.06234221423132289
mee-type_ddpm_maxabs_5.csv	logistic_l1_3	0.4558139534883721	0.04607351803757893	0.3986061248705185	0.5130217821062257	0.588918838199744	0.04190929651188785	0.5368815735308862	0.6409561028686018	0.048210609948865876
mee-type_ddpm_maxabs_5.csv	logistic_l2_balanced_1	0.43488372093023253	0.06859479629652382	0.34971203190471783	0.5200554099557472	0.6125574664733351	0.06148198900538795	0.5362174941873851	0.6888974387592851	0.05318736081316529
mee-type_ddpm_maxabs_5.csv	logistic_l1_balanced_1	0.21627906976744185	0.013257853780222536	0.1998172700350898	0.2327408694997939	0.18699065348245142	0.1722297049767924	-0.026860770608487794	0.40084207757339063	0.057247541111712805
mee-type_ddpm_maxabs_5.csv	rf_100_10	0.3604651162790698	0.04350764403225515	0.3064432410375536	0.414486991520586	0.6611430752709823	0.05533249145223427	0.5924387127038253	0.7298474378381392	0.05294217020328086
mee-type_ddpm_maxabs_5.csv	rf_100_20	0.3883720930232558	0.08724805340606544	0.28003932619558486	0.49670485985092677	0.5834923990737944	0.019804674111015035	0.5589016482339888	0.6080831499135999	0.052222790697674416
mee-type_ddpm_maxabs_5.csv	rf_200_10	0.40232558139534885	0.11231619200970465	0.26286660936155704	0.5417845534291407	0.5944731926127275	0.03017198287955506	0.5570097277167635	0.6319366575086914	0.0512788657092491
mee-type_ddpm_maxabs_5.csv	rf_200_20	0.38604651162790693	0.09170578675874583	0.2721787377826206	0.4999142854731933	0.6576059599315414	0.04925511076861571	0.5964476621626126	0.7187642577004701	0.05175852713178295
mee-type_ddpm_maxabs_5.csv	rf_bal_100_10	0.37906976744186044	0.10548761330271372	0.2480895957474401	0.5100499391362807	0.654811552619945	0.011360151817835921	0.6407060610936091	0.6689170441462808	0.05205502579200041
mee-type_ddpm_maxabs_5.csv	rf_bal_200_20	0.4069767441860465	0.11061800924674679	0.2696263445513897	0.5443271438207034	0.6472668096405065	0.10119320397486703	0.5216188514020239	0.7729147678789892	0.051007100775193805
mee-type_ddpm_maxabs_5.csv	decision_tree	0.3209302325581395	0.1714081280143332	0.10809893100323953	0.5337615341130395	0.42573801427183894	0.21138467110002238	0.163269278394797	0.6882067501488809	0.09054263565891475
mee-type_ddpm_maxabs_5.csv	decision_tree_bal	0.20930232558139536	0.07580467913026337	0.11517838460995893	0.3034262665528318	0.333700879224135	0.0958855158235	0.2146432862768975	0.4527584721713725	0.1054263565891473
mee-type_ddpm_maxabs_5.csv	extra_tree	0.42325581395348844	0.05848733181376416	0.3506341996893397	0.4958774282176372	0.6707933023049302	0.016400464672503633	0.6504294357672696	0.6911571688425907	0.050248
mee-type_ddpm_maxabs_5.csv	extra_tree_bal	0.43488372093023253	0.11499288665187084	0.2921011935250781	0.5776662483353869	0.6494380837027895	0.06913195964020691	0.5635994182922688	0.7352767491133103	0.0498975503875969
mee-type_ddpm_maxabs_5.csv	lda	0.14883720930232558	0.15652389460896596	-0.04551287549226807	0.3431872940969192	0.14711288469282657	0.16866306080439522	-0.062309965734843764	0.3565357351204969	0.1130380919069615
mee-type_ddpm_maxabs_5.csv	gaussian_nb	0.2744186046511628	0.12780122478171244	0.11573242491336347	0.43310478438896216	0.13824078991069338	0.055507984774850215	0.06931852360291907	0.2071630562184677	0.09674389493422901
mee-type_ddpm_maxabs_5.csv	svm_rbf_1	0.3674418604651163	0.04694564939113105	0.3091511377438523	0.4257325831863803	0.5873397210025117	0.027922724003719243	0.5526690798753134	0.6220103621297101	0.0631045672973545
mee-type_ddpm_maxabs_5.csv	svm_rbf_2	0.40232558139534885	0.07695531212918276	0.30677294085400897	0.49787822193668874	0.5807665778216841	0.04146173144450815	0.5292850385838452	0.6322481170595229	0.05413941972159701
mee-type_ddpm_maxabs_5.csv	svm_rbf_3	0.3674418604651163	0.04694564939113105	0.3091511377438523	0.4257325831863803	0.5873397210025117	0.027922724003719243	0.5526690798753134	0.6220103621297101	0.06252977160148943
mee-type_ddpm_maxabs_5.csv	svm_rbf_auto	0.3651162790697674	0.04078064631802369	0.31448041871319643	0.4157521394263384	0.5962999048754863	0.026128779865009506	0.5638567396001126	0.6287430701508601	0.06337817682799353
mee-type_ddpm_maxabs_5.csv	svm_rbf_bal	0.3674418604651163	0.04694564939113105	0.3091511377438523	0.4257325831863803	0.5873397210025117	0.027922724003719243	0.5526690798753134	0.6220103621297101	0.06475335296595573
mee-type_ddpm_maxabs_5.csv	svm_sigmoid	0.3744186046511628	0.03891441983879421	0.3260999705263456	0.42273723877597996	0.6157896356609368	0.022084940707654214	0.5883675598817778	0.6432117114400958	0.06275495094644809
mee-type_ddpm_maxabs_5.csv	svm_sigmoid_bal	0.3744186046511628	0.03891441983879421	0.3260999705263456	0.42273723877597996	0.6157896356609368	0.022084940707654214	0.5883675598817778	0.6432117114400958	0.06275917610503481
mee-type_ddpm_maxabs_5.csv	svm_poly_3	0.3441860465116279	0.033499675095088215	0.3025907059945335	0.3857813870287222	0.5927546097313539	0.04604453877405407	0.5355827636217135	0.6499264558409942	0.0632502473905746
mee-type_ddpm_maxabs_5.csv	svm_poly_4	0.33255813953488367	0.04473345130621243	0.27701422353255845	0.3881020555372089	0.5696075261268041	0.033220579371990085	0.5283587287211333	0.6108563235324749	0.060836524888652585
mee-type_ddpm_maxabs_5.csv	mlp_50_lr0.001	0.41395348837209306	0.04766023612074232	0.3547754890350766	0.4731314877091095	0.5952768445684603	0.026394050489863298	0.5625043023084245	0.6280493868284961	0.05001420593481243
mee-type_ddpm_maxabs_5.csv	mlp_100_lr0.001	0.45813953488372094	0.03908775886970143	0.40960567192474273	0.5066733978426992	0.6102323771020222	0.032062539501203004	0.5704214761123922	0.6500432780916521	0.048915188838479624
mee-type_ddpm_maxabs_5.csv	mlp_50x2_lr0.001	0.4209302325581395	0.017246973225803874	0.39951528682567455	0.44234517829060443	0.6251357128203914	0.04370140567021677	0.5708732507287853	0.6793981749119975	0.05722315842302891
mee-type_ddpm_maxabs_5.csv	mlp_128_64	0.4418604651162791	0.02466651562278654	0.41123294070633426	0.4724879895262239	0.6100198255157215	0.03441149559044034	0.5672923103167241	0.652747340714719	0.05913151933721602
mee-type_ddpm_maxabs_5.csv	mlp_128_64_es	0.06511627906976744	0.043195757258155144	0.011481662407167158	0.11875089573236772	0.018547092578491027	0.029503819500307973	-0.018086737904543626	0.05518092306152568	0.06316885398016367
mee-type_ddpm_maxabs_5.csv	mlp_128_64_alpha	0.40232558139534885	0.08164413805368352	0.3009509945097119	0.5037001682809858	0.5550846946471182	0.07729623930583535	0.45910873710451955	0.6510606521897169	0.06212657224177722
mee-type_flow_maxabs_100.csv	logistic_l2_1	0.4461538461538462	0.009828870230768321	0.4339496918452844	0.45835800046240793	0.2724095952356822	0.007160962990612627	0.26351808529776893	0.28130110517359547	0.04078905217877627
mee-type_flow_maxabs_100.csv	logistic_l2_2	0.4131868131868132	0.006018929203353483	0.4057133254872719	0.42066030088635453	0.21886232596335925	0.0035977062399499536	0.21439518364910035	0.22332946827761815	0.04180395058809592
mee-type_flow_maxabs_100.csv	logistic_l2_3	0.45714285714285713	0.014743305346152452	0.4388366256800145	0.47544908860569973	0.2801685439404882	0.009103607803462175	0.2688649218771623	0.29147216600381404	0.04068130829433066
mee-type_flow_maxabs_100.csv	logistic_l1_1	0.4175824175824176	0.0	0.4175824175824176	0.4175824175824176	0.2406545596126631	0.0052788084474124225	0.2341000532100972	0.24720906601522902	0.04164319419699909
mee-type_flow_maxabs_100.csv	logistic_l1_2	0.38461538461538464	0.0	0.38461538461538464	0.38461538461538464	0.14792899408284024	0.0	0.14792899408284024	0.14792899408284024	0.04564039972456516
mee-type_flow_maxabs_100.csv	logistic_l1_3	0.4461538461538462	0.009828870230768321	0.4339496918452844	0.45835800046240793	0.27230600317556836	0.007731287329548935	0.2627063420386985	0.2819056643124382	0.04077161327816875
mee-type_flow_maxabs_100.csv	logistic_l2_balanced_1	0.38901098901098907	0.04827666513514022	0.3290675919593465	0.44895438606263166	0.6602852214940127	0.09405680786523933	0.5434982693817761	0.7770721736062493	0.05193492854584171
mee-type_flow_maxabs_100.csv	logistic_l1_balanced_1	0.3010989010989011	0.03259867466855237	0.2606223003738025	0.34157550182399965	0.5237782205263407	0.019625713994493924	0.49940967802033376	0.5481467630323477	0.0532980491005565
mee-type_flow_maxabs_100.csv	rf_100_10	0.6351648351648351	0.00919406622564919	0.6237488941353453	0.646580776194325	0.686968903070696	0.042839506728274766	0.6337766298653892	0.7401611762760029	0.03116416425243177
mee-type_flow_maxabs_100.csv	rf_100_20	0.6505494505494506	0.03422508022504931	0.6080534005983712	0.6930455005005299	0.7273090940933624	0.07025512905428365	0.640075829657499	0.8145423585292259	0.030991234647705236
mee-type_flow_maxabs_100.csv	rf_200_10	0.6373626373626373	0.015540808377726322	0.6180661750970311	0.6566590996282435	0.7012983184469592	0.07259755564456803	0.6111565472455045	0.791440089648414	0.031006732687360244
mee-type_flow_maxabs_100.csv	rf_200_20	0.6461538461538461	0.023823608119427228	0.6165729296446384	0.6757347626630538	0.706092217199159	0.07214378939564807	0.6165138712125882	0.7956705631857299	0.03114801551389787
mee-type_flow_maxabs_100.csv	rf_bal_100_10	0.654945054945055	0.02529860314993699	0.6235326902089338	0.6863574196811761	0.6997214331500753	0.02894152727835644	0.6637857806755079	0.7356570856246427	0.029958789250190326
mee-type_flow_maxabs_100.csv	rf_bal_200_20	0.6813186813186813	0.024572175576920766	0.6508082955472769	0.7118290670900858	0.75924231275534	0.02189403646151638	0.7320572759057146	0.7864273496049655	0.0291072268907563
mee-type_flow_maxabs_100.csv	decision_tree	0.4813186813186813	0.041409766332784134	0.4299016652892328	0.5327356973481298	0.5375673556887979	0.06261613029808429	0.45981916099083053	0.6153155503867652	0.061021331609566895
mee-type_flow_maxabs_100.csv	decision_tree_bal	0.5164835164835165	0.037265549357831135	0.4702122254726121	0.562754807494421	0.48596893017707493	0.0692818884205321	0.3999441035977298	0.5719937567564201	0.056884292178409825
mee-type_flow_maxabs_100.csv	extra_tree	0.6681318681318681	0.02113778468315534	0.6418858418890111	0.6943778943747251	0.7221040716450794	0.04158426506109234	0.6704703868269583	0.7737377564632005	0.029429140271493216
mee-type_flow_maxabs_100.csv	extra_tree_bal	0.6703296703296703	0.02331121256658949	0.6413849769312608	0.6992743637280797	0.6940541235321455	0.04387100259054391	0.6395810790503629	0.748527168013928	0.029261771170006466
mee-type_flow_maxabs_100.csv	lda	0.4747252747252747	0.1212282669935966	0.32420050003469186	0.6252500494158575	0.5890657547937641	0.1272524024021475	0.43106102804607904	0.7470704815414492	0.05937995542188035
mee-type_flow_maxabs_100.csv	gaussian_nb	0.254945054945055	0.016299337334276187	0.2347067545825057	0.2751833553076043	0.30684735470217805	0.032291909984992956	0.2667516526405756	0.3469430567637805	0.08699438552084451
mee-type_flow_maxabs_100.csv	svm_rbf_1	0.38461538461538464	0.0	0.38461538461538464	0.38461538461538464	0.14792899408284024	0.0	0.14792899408284024	0.14792899408284024	0.03492443555967005
mee-type_flow_maxabs_100.csv	svm_rbf_2	0.49230769230769234	0.0049144351153841605	0.48620561515341143	0.49840976946197324	0.3684485525622649	0.00037392441095314183	0.36798426408313484	0.36891284104139493	0.034942654082923616
mee-type_flow_maxabs_100.csv	svm_rbf_3	0.38461538461538464	0.0	0.38461538461538464	0.38461538461538464	0.14792899408284024	0.0	0.14792899408284024	0.14792899408284024	0.035470386229082475
mee-type_flow_maxabs_100.csv	svm_rbf_auto	0.38461538461538464	0.0	0.38461538461538464	0.38461538461538464	0.14792899408284024	0.0	0.14792899408284024	0.14792899408284024	0.036415975239553734
mee-type_flow_maxabs_100.csv	svm_rbf_bal	0.12087912087912087	1.5515838457795457e-17	0.12087912087912085	0.12087912087912088	0.01481309644951805	0.00018171152362655152	0.014587471792572209	0.015038721106463893	0.04970775306876904
mee-type_flow_maxabs_100.csv	svm_sigmoid	0.38461538461538464	0.0	0.38461538461538464	0.38461538461538464	0.14792899408284024	0.0	0.14792899408284024	0.14792899408284024	0.035061867999546206
mee-type_flow_maxabs_100.csv	svm_sigmoid_bal	0.12087912087912087	1.5515838457795457e-17	0.12087912087912085	0.12087912087912088	0.014762230410191085	0.00013916609823432332	0.014589432876243038	0.014935027944139133	0.049519989027984074
mee-type_flow_maxabs_100.csv	svm_poly_3	0.38461538461538464	0.0	0.38461538461538464	0.38461538461538464	0.14792899408284024	0.0	0.14792899408284024	0.14792899408284024	0.03548675461056542
mee-type_flow_maxabs_100.csv	svm_poly_4	0.38461538461538464	0.0	0.38461538461538464	0.38461538461538464	0.14792899408284024	0.0	0.14792899408284024	0.14792899408284024	0.04036074558918255
mee-type_flow_maxabs_100.csv	mlp_50_lr0.001	0.5340659340659341	0.021421526032547145	0.5074675964047355	0.5606642717271326	0.5018323754915828	0.018994985253841464	0.4782469861554764	0.5254177648276892	0.033781227192673076
mee-type_flow_maxabs_100.csv	mlp_100_lr0.001	0.5758241758241758	0.032598674668552374	0.5353475750990772	0.6163007765492744	0.5970580564124519	0.08151925596149406	0.495838531124707	0.6982775817001968	0.03177120434553472
mee-type_flow_maxabs_100.csv	mlp_50x2_lr0.001	0.5934065934065934	0.015540808377726343	0.5741101311409871	0.6127030556721997	0.6451234564471494	0.07240097612850122	0.5552257709535792	0.7350211419407197	0.03305896398089051
mee-type_flow_maxabs_100.csv	mlp_128_64	0.5912087912087912	0.0367762649025967	0.5455450270908322	0.6368725553267502	0.6724390842200618	0.09715993817626488	0.55179908691889	0.7930790815212336	0.03235346059845706
mee-type_flow_maxabs_100.csv	mlp_128_64_es	0.38461538461538464	0.02457217557692076	0.3541049988439803	0.415125770386789	0.20005133138353998	0.06320260447100966	0.12157493281917488	0.2785277299479051	0.0531574833066593
mee-type_flow_maxabs_100.csv	mlp_128_64_alpha	0.5736263736263736	0.04877437587070798	0.513064987072857	0.6341877601798902	0.6729937904178891	0.07064730125421173	0.5852735798802786	0.7607140009554996	0.032981356437614864
mee-type_flow_maxabs_1000.csv	logistic_l2_1	0.38461538461538464	0.0	0.38461538461538464	0.38461538461538464	0.14792899408284024	0.0	0.14792899408284024	0.14792899408284024	0.05536332179930774
mee-type_flow_maxabs_1000.csv	logistic_l2_2	0.38461538461538464	0.0	0.38461538461538464	0.38461538461538464	0.14792899408284024	0.0	0.14792899408284024	0.14792899408284024	0.05536332179930774
mee-type_flow_maxabs_1000.csv	logistic_l2_3	0.38461538461538464	0.0	0.38461538461538464	0.38461538461538464	0.14792899408284024	0.0	0.14792899408284024	0.14792899408284024	0.05536332179930774
mee-type_flow_maxabs_1000.csv	logistic_l1_1	0.38461538461538464	0.0	0.38461538461538464	0.38461538461538464	0.14792899408284024	0.0	0.14792899408284024	0.14792899408284024	0.05536332179930774
mee-type_flow_maxabs_1000.csv	logistic_l1_2	0.38461538461538464	0.0	0.38461538461538464	0.38461538461538464	0.14792899408284024	0.0	0.14792899408284024	0.14792899408284024	0.05536332179930774
mee-type_flow_maxabs_1000.csv	logistic_l1_3	0.38461538461538464	0.0	0.38461538461538464	0.38461538461538464	0.14792899408284024	0.0	0.14792899408284024	0.14792899408284024	0.05536332179930774
mee-type_flow_maxabs_1000.csv	logistic_l2_balanced_1	0.07912087912087913	0.014327917374071759	0.061330419948255985	0.09691133829350228	0.05462949813057051	0.024003575710806337	0.0248251223423039	0.08443387391883712	0.05536332179930764
mee-type_flow_maxabs_1000.csv	logistic_l1_balanced_1	0.07252747252747252	0.009828870230768307	0.060323318218910765	0.08473162683603427	0.0282891156462585	0.011856082741738692	0.013567844546116564	0.04301038674640044	0.05536332179930764
mee-type_flow_maxabs_1000.csv	rf_100_10	0.6000000000000001	0.03351197952082837	0.5583893815204456	0.6416106184795546	0.6531081689548361	0.04368777741785406	0.5988626285735472	0.7073537093361251	0.030473308362144912
mee-type_flow_maxabs_1000.csv	rf_100_20	0.6131868131868132	0.028444349682516003	0.5778684882337144	0.6485051381399121	0.6551228622983212	0.044117319936465525	0.6003439744359746	0.7099017501606677	0.030258823529411765
mee-type_flow_maxabs_1000.csv	rf_200_10	0.6417582417582417	0.016665660316596807	0.6210650913368303	0.6624513921796531	0.67955369791111	0.030406027287921317	0.6417996284992967	0.7173077673229232	0.029853428301251223
mee-type_flow_maxabs_1000.csv	rf_200_20	0.6175824175824176	0.05461438962544693	0.5497696962006269	0.6853951389642083	0.6575231821981172	0.0512993819508118	0.5938265864996901	0.7212197778965443	0.030116515837104074
mee-type_flow_maxabs_1000.csv	rf_bal_100_10	0.6263736263736264	0.05095394777744892	0.5631059438520132	0.6896413088952396	0.6366109836876134	0.07679009151646989	0.5412634916328403	0.7319584757423865	0.02953927271817024
mee-type_flow_maxabs_1000.csv	rf_bal_200_20	0.6483516483516483	0.02801659073402629	0.6135644562847986	0.6831388404184979	0.668545759712839	0.07765925155176272	0.5721190629335653	0.7649724564921128	0.028712501616031026
mee-type_flow_maxabs_1000.csv	decision_tree	0.49230769230769234	0.03333132063319362	0.4509213914648694	0.5336939931505152	0.5096506624216671	0.036386568894949255	0.46447076980664764	0.5548305550366867	0.05972850678733031
mee-type_flow_maxabs_1000.csv	decision_tree_bal	0.5098901098901099	0.03069063745883284	0.47178265027555316	0.5479975695046665	0.49003118456260586	0.09387771481446772	0.3734666058438409	0.6065957632813708	0.057659987071751774
mee-type_flow_maxabs_1000.csv	extra_tree	0.6681318681318681	0.018056787610060417	0.6457114050332442	0.690552331230492	0.6968604167505266	0.05033014306023346	0.6343672900881896	0.7593535434128635	0.02909936651583711
mee-type_flow_maxabs_1000.csv	extra_tree_bal	0.6703296703296703	0.03475030395789428	0.6271814689785151	0.7134778716808254	0.7148840256462421	0.03812589020722616	0.6675444803764599	0.7622235709160243	0.02844760180995475
mee-type_flow_maxabs_1000.csv	lda	0.6505494505494506	0.03146773860060739	0.6114770924241894	0.6896218086747118	0.7208826724915095	0.07313215881659209	0.630077103778027	0.8116882412049921	0.03773690472606995
mee-type_flow_maxabs_1000.csv	gaussian_nb	0.38461538461538464	0.0	0.38461538461538464	0.38461538461538464	0.14792899408284024	0.0	0.14792899408284024	0.14792899408284024	0.04913521657207849
mee-type_flow_maxabs_1000.csv	svm_rbf_1	0.38461538461538464	0.0	0.38461538461538464	0.38461538461538464	0.14792899408284024	0.0	0.14792899408284024	0.14792899408284024	0.04897778835178003
mee-type_flow_maxabs_1000.csv	svm_rbf_2	0.38461538461538464	0.0	0.38461538461538464	0.38461538461538464	0.14792899408284024	0.0	0.14792899408284024	0.14792899408284024	0.0489693903647863
mee-type_flow_maxabs_1000.csv	svm_rbf_3	0.38461538461538464	0.0	0.38461538461538464	0.38461538461538464	0.14792899408284024	0.0	0.14792899408284024	0.14792899408284024	0.048982151565046296
mee-type_flow_maxabs_1000.csv	svm_rbf_auto	0.38461538461538464	0.0	0.38461538461538464	0.38461538461538464	0.14792899408284024	0.0	0.14792899408284024	0.14792899408284024	0.036388579599128376
mee-type_flow_maxabs_1000.csv	svm_rbf_bal	0.03296703296703297	0.0	0.03296703296703297	0.03296703296703297	0.0010868252626494385	0.0	0.0010868252626494385	0.0010868252626494385	0.049371851078812604
mee-type_flow_maxabs_1000.csv	svm_sigmoid	0.38461538461538464	0.0	0.38461538461538464	0.38461538461538464	0.14792899408284024	0.0	0.14792899408284024	0.14792899408284024	0.04896512792579287
mee-type_flow_maxabs_1000.csv	svm_sigmoid_bal	0.03296703296703297	0.0	0.03296703296703297	0.03296703296703297	0.0010868252626494385	0.0	0.0010868252626494385	0.0010868252626494385	0.049423660128147806
mee-type_flow_maxabs_1000.csv	svm_poly_3	0.38461538461538464	0.0	0.38461538461538464	0.38461538461538464	0.14792899408284024	0.0	0.14792899408284024	0.14792899408284024	0.04895935327500165
mee-type_flow_maxabs_1000.csv	svm_poly_4	0.38461538461538464	0.0	0.38461538461538464	0.38461538461538464	0.14792899408284024	0.0	0.14792899408284024	0.14792899408284024	0.04896251141480323
mee-type_flow_maxabs_1000.csv	mlp_50_lr0.001	0.5252747252747252	0.034225080225049324	0.48277867532364577	0.5677707752258045	0.43176550404104586	0.09399249826651654	0.31505840284228237	0.5484726052398093	0.03483833185257924
mee-type_flow_maxabs_1000.csv	mlp_100_lr0.001	0.45494505494505494	0.06341335404946599	0.37620697621648397	0.5336831336736259	0.2987410415125347	0.18658605545315013	0.06706385388950661	0.5304182291355628	0.03829705272902465
mee-type_flow_maxabs_1000.csv	mlp_50x2_lr0.001	0.4593406593406593	0.08347309457069425	0.35569512299357	0.5629861956877487	0.2988774371726557	0.14461208765170083	0.11931781423045132	0.4784370601148601	0.03806632070305294
mee-type_flow_maxabs_1000.csv	mlp_128_64	0.5318681318681319	0.027582198676947542	0.49762030877966257	0.5661159549566012	0.48717924934200924	0.0692815326760772	0.40115486447774634	0.5732036342062722	0.03340158697897857
mee-type_flow_maxabs_1000.csv	mlp_128_64_es	0.36923076923076925	0.028655834748143528	0.33364985088552296	0.40481168757601554	0.16569349453964838	0.02389231933582851	0.1360272617867624	0.19535972729253437	0.053084286240862054
mee-type_flow_maxabs_1000.csv	mlp_128_64_alpha	0.5604395604395604	0.0538349394018281	0.4935946543388291	0.6272844665402918	0.5685273838780627	0.07240763812239982	0.47862142642651223	0.6584333413296131	0.03238792508121917
mee-type_flow_maxabs_10000.csv	logistic_l2_1	0.03736263736263736	0.016665660316596814	0.016669486941225914	0.05805578778404881	0.0016181620577224974	0.0013022881018759003	1.15780633407319e-06	0.0032351663091109216	0.05536332179930799
mee-type_flow_maxabs_10000.csv	logistic_l2_2	0.03736263736263736	0.016665660316596814	0.016669486941225914	0.05805578778404881	0.0016181620577224974	0.0013022881018759003	1.15780633407319e-06	0.0032351663091109216	0.05536332179930799
mee-type_flow_maxabs_10000.csv	logistic_l2_3	0.03736263736263736	0.016665660316596814	0.016669486941225914	0.05805578778404881	0.0016181620577224974	0.0013022881018759003	1.15780633407319e-06	0.0032351663091109216	0.05536332179930799
mee-type_flow_maxabs_10000.csv	logistic_l1_1	0.03736263736263736	0.016665660316596814	0.016669486941225914	0.05805578778404881	0.0016181620577224974	0.0013022881018759003	1.15780633407319e-06	0.0032351663091109216	0.05536332179930799
mee-type_flow_maxabs_10000.csv	logistic_l1_2	0.03736263736263736	0.016665660316596814	0.016669486941225914	0.05805578778404881	0.0016181620577224974	0.0013022881018759003	1.15780633407319e-06	0.0032351663091109216	0.05536332179930799
mee-type_flow_maxabs_10000.csv	logistic_l1_3	0.03736263736263736	0.016665660316596814	0.016669486941225914	0.05805578778404881	0.0016181620577224974	0.0013022881018759003	1.15780633407319e-06	0.0032351663091109216	0.05536332179930799
mee-type_flow_maxabs_10000.csv	logistic_l2_balanced_1	0.03736263736263736	0.016665660316596814	0.016669486941225914	0.05805578778404881	0.0016205772249728294	0.0013010669842040718	5.08919143508502e-06	0.003236065258510574	0.055363321799307995
mee-type_flow_maxabs_10000.csv	logistic_l1_balanced_1	0.03736263736263736	0.016665660316596814	0.016669486941225914	0.05805578778404881	0.0016205772249728294	0.0013010669842040718	5.08919143508502e-06	0.003236065258510574	0.055363321799307995
mee-type_flow_maxabs_10000.csv	rf_100_10	0.6241758241758242	0.028444349682515982	0.5888574992227253	0.659494149128923	0.6528525774936758	0.025026633390575613	0.6217779078163538	0.6839272471709977	0.031008555183629237
mee-type_flow_maxabs_10000.csv	rf_100_20	0.6263736263736264	0.025771515163864975	0.5943740638154927	0.65837318893176	0.6295502496123614	0.05994630120200161	0.5551170855843568	0.703983413640366	0.03128548157724628
mee-type_flow_maxabs_10000.csv	rf_200_10	0.6307692307692307	0.02407571681341393	0.6008752799710656	0.6606631815673959	0.6536878155912136	0.049674057984069146	0.5920093261477085	0.7153663050347187	0.03117980066968664
mee-type_flow_maxabs_10000.csv	rf_200_20	0.6483516483516484	0.02907419023147904	0.6122512730642933	0.6844520236390035	0.6937161956798843	0.053887075488527225	0.6268065540772914	0.7606258372824772	0.030864402068519713
mee-type_flow_maxabs_10000.csv	rf_bal_100_10	0.5934065934065934	0.045970331128245875	0.5363268882591445	0.6504862985540423	0.6029498674154989	0.0624340507646611	0.5254277543189929	0.680471980512005	0.030950142648385547
mee-type_flow_maxabs_10000.csv	rf_bal_200_20	0.610989010989011	0.0286558347481435	0.5754080926437648	0.6465699293342573	0.5956106222676494	0.04369186614660157	0.5413600050590763	0.6498612394762224	0.030144201680672267
mee-type_flow_maxabs_10000.csv	decision_tree	0.4945054945054945	0.03885202094431582	0.44626433884147887	0.5427466501695102	0.4814849940262029	0.13303681160727301	0.316297974617635	0.6466720134347708	0.059469941822882996
mee-type_flow_maxabs_10000.csv	decision_tree_bal	0.5318681318681319	0.06388765649999396	0.45254112886248055	0.6111951348737832	0.5163893781128575	0.0828688045890491	0.4134941668804521	0.6192845893452628	0.05507433742727861
mee-type_flow_maxabs_10000.csv	extra_tree	0.6373626373626374	0.033870406609719655	0.5953069728708257	0.6794183018544492	0.6509117379673997	0.024821624577095056	0.620091620353091	0.6817318555817083	0.029838862314156434
mee-type_flow_maxabs_10000.csv	extra_tree_bal	0.6571428571428571	0.035945993920431046	0.6125100106122064	0.7017757036735078	0.655183700184971	0.041082584176611314	0.604172934459697	0.7061944659102449	0.02923239819004525
mee-type_flow_maxabs_10000.csv	lda	0.38461538461538464	0.0	0.38461538461538464	0.38461538461538464	0.1555344647263289	0.004206861909676666	0.15031095574766865	0.16075797370498915	0.04934999524314437
mee-type_flow_maxabs_10000.csv	gaussian_nb	0.38461538461538464	0.0	0.38461538461538464	0.38461538461538464	0.14792899408284024	0.0	0.14792899408284024	0.14792899408284024	0.049079272582667796
mee-type_flow_maxabs_10000.csv	svm_rbf_1	0.38461538461538464	0.0	0.38461538461538464	0.38461538461538464	0.14792899408284024	0.0	0.14792899408284024	0.14792899408284024	0.04903888254939682
mee-type_flow_maxabs_10000.csv	svm_rbf_2	0.38461538461538464	0.0	0.38461538461538464	0.38461538461538464	0.14792899408284024	0.0	0.14792899408284024	0.14792899408284024	0.04906649155486906
mee-type_flow_maxabs_10000.csv	svm_rbf_3	0.38461538461538464	0.0	0.38461538461538464	0.38461538461538464	0.14792899408284024	0.0	0.14792899408284024	0.14792899408284024	0.04905311256206095
mee-type_flow_maxabs_10000.csv	svm_rbf_auto	0.38461538461538464	0.0	0.38461538461538464	0.38461538461538464	0.14792899408284024	0.0	0.14792899408284024	0.14792899408284024	0.041837491193905
mee-type_flow_maxabs_10000.csv	svm_rbf_bal	0.02197802197802198	0.0	0.02197802197802198	0.02197802197802198	0.0004830334500664171	6.06087439757635e-20	0.00048303345006641703	0.00048303345006641714	0.048877496869190455
mee-type_flow_maxabs_10000.csv	svm_sigmoid	0.38461538461538464	0.0	0.38461538461538464	0.38461538461538464	0.14792899408284024	0.0	0.14792899408284024	0.14792899408284024	0.04908508944093779
mee-type_flow_maxabs_10000.csv	svm_sigmoid_bal	0.02197802197802198	0.0	0.02197802197802198	0.02197802197802198	0.0004830334500664171	6.06087439757635e-20	0.00048303345006641703	0.00048303345006641714	0.048904749891188884
mee-type_flow_maxabs_10000.csv	svm_poly_3	0.38461538461538464	0.0	0.38461538461538464	0.38461538461538464	0.14792899408284024	0.0	0.14792899408284024	0.14792899408284024	0.04904790687287343
mee-type_flow_maxabs_10000.csv	svm_poly_4	0.38461538461538464	0.0	0.38461538461538464	0.38461538461538464	0.14792899408284024	0.0	0.14792899408284024	0.14792899408284024	0.04905786377028968
mee-type_flow_maxabs_10000.csv	mlp_50_lr0.001	0.4329670329670329	0.06147956365142577	0.3566300721557807	0.5093039937782852	0.24503191972897304	0.09707070035833154	0.12450272581360732	0.36556111364433874	0.0398574620042729
mee-type_flow_maxabs_10000.csv	mlp_100_lr0.001	0.4197802197802198	0.03916160369495705	0.371154666360268	0.46840577320017157	0.26101940250665656	0.14964194219782112	0.07521439025833307	0.44682441475498	0.040320687597498614
mee-type_flow_maxabs_10000.csv	mlp_50x2_lr0.001	0.3868131868131868	0.004914435115384136	0.380711109658906	0.3929152639674677	0.158973986167919	0.021060260560786564	0.13282421883679965	0.18512375349903834	0.04249579092333556
mee-type_flow_maxabs_10000.csv	mlp_128_64	0.41098901098901097	0.04155531956305283	0.3593912667537156	0.46258675522430637	0.21665225084517226	0.07649585611110415	0.12167010030023866	0.31163440139010584	0.04115157141906201
mee-type_flow_maxabs_10000.csv	mlp_128_64_es	0.3802197802197802	0.006018929203353483	0.3727462925202389	0.3876932679193215	0.16502113271344038	0.023561859121650278	0.1357652205113382	0.19427704491554254	0.05087211012936264
mee-type_flow_maxabs_10000.csv	mlp_128_64_alpha	0.421978021978022	0.050117601103258795	0.35974880101176815	0.4842072429442758	0.229404470307929	0.06954389419806581	0.1430543205872989	0.3157546200285591	0.040486988908451725
mee-type_gan_maxabs_100.csv	logistic_l2_1	0.45	0.00622411997164961	0.44227173431070166	0.45772826568929836	0.3651639721310484	0.020132252592993	0.34016647888358453	0.39016146537851226	0.038899122365243025
mee-type_gan_maxabs_100.csv	logistic_l2_2	0.4545454545454545	0.028971701781777184	0.41857233547632583	0.4905185736145831	0.28090585327306	0.02547995750165111	0.24926830736749783	0.31254339917862217	0.04185537517198297
mee-type_gan_maxabs_100.csv	logistic_l2_3	0.43636363636363634	0.010163945352271763	0.42374343134001	0.44898384138726266	0.39645144600873317	0.028040329252951857	0.36163477867756294	0.4312681133399034	0.039575554068063415
mee-type_gan_maxabs_100.csv	logistic_l1_1	0.45227272727272727	0.009507500301523577	0.440467606435414	0.46407784811004055	0.36774128084903435	0.01936471782197494	0.3436968078941132	0.39178575380395547	0.03908295227060286
mee-type_gan_maxabs_100.csv	logistic_l1_2	0.3977272727272727	0.0	0.3977272727272727	0.3977272727272727	0.1612847277195501	0.005962548296633004	0.15388124616206972	0.1686882092770305	0.04597315444732528
mee-type_gan_maxabs_100.csv	logistic_l1_3	0.43636363636363634	0.010163945352271763	0.42374343134001	0.44898384138726266	0.39046511208122275	0.019576419837729054	0.3661577763549926	0.4147724478074529	0.039631230918771285
mee-type_gan_maxabs_100.csv	logistic_l2_balanced_1	0.45	0.00622411997164961	0.44227173431070166	0.45772826568929836	0.3651639721310484	0.020132252592993	0.34016647888358453	0.39016146537851226	0.03889944776945732
mee-type_gan_maxabs_100.csv	logistic_l1_balanced_1	0.45227272727272727	0.009507500301523577	0.440467606435414	0.46407784811004055	0.36774128084903435	0.01936471782197494	0.3436968078941132	0.39178575380395547	0.039082924004970314
mee-type_gan_maxabs_100.csv	rf_100_10	0.6045454545454545	0.0435688398015473	0.5504475947203659	0.6586433143705431	0.6169813208842341	0.0974035494942699	0.4960388401799405	0.7379238015885277	0.03322927459332221
mee-type_gan_maxabs_100.csv	rf_100_20	0.65	0.03717142553135483	0.6038455791558044	0.6961544208441957	0.7007503114010143	0.05007230003670603	0.6385773391381793	0.7629232836638493	0.0324499419713135
mee-type_gan_maxabs_100.csv	rf_200_10	0.6454545454545455	0.06789713293768024	0.5611491199045728	0.7297599710045182	0.6742903826433483	0.06618836946806113	0.5921066671750475	0.7564740981116491	0.03309178060866628
mee-type_gan_maxabs_100.csv	rf_200_20	0.634090909090909	0.051701423482169655	0.5698951128972122	0.6982867052846059	0.6567390235403592	0.07246626634450813	0.5667602695361382	0.7467177775445801	0.032466090926868266
mee-type_gan_maxabs_100.csv	rf_bal_100_10	0.6431818181818183	0.0599155742112003	0.5687868067520648	0.7175768296115718	0.6799610560041138	0.08644877841248544	0.5726207201606357	0.787301391847592	0.032996411821037644
mee-type_gan_maxabs_100.csv	rf_bal_200_20	0.634090909090909	0.031532811194344534	0.5949377526687347	0.6732440655130834	0.6484950703536229	0.033002981919187234	0.6075164558711982	0.6894736848360475	0.03266524571314257
mee-type_gan_maxabs_100.csv	decision_tree	0.4545454545454546	0.03214121732666125	0.4146368621324962	0.494454046958413	0.4724816142770842	0.05099579259764348	0.40916197454872416	0.5358012540054442	0.06818181818181818
mee-type_gan_maxabs_100.csv	decision_tree_bal	0.425	0.02736726040634612	0.39101905802397263	0.45898094197602735	0.4647828880220549	0.03995656330540162	0.415170261873788	0.5143955141703218	0.071875
mee-type_gan_maxabs_100.csv	extra_tree	0.6931818181818182	0.03313040849343923	0.6520449827097304	0.734318653653906	0.7254203108615818	0.035032102058278815	0.6819222109544169	0.7689184107687467	0.03070474431818182
mee-type_gan_maxabs_100.csv	extra_tree_bal	0.6863636363636363	0.026161055530048525	0.6538803955569655	0.718846877170307	0.7221867518721731	0.030154303512237045	0.684745238810119	0.7596282649342272	0.030399602272727273
mee-type_gan_maxabs_100.csv	lda	0.3977272727272727	0.0	0.3977272727272727	0.3977272727272727	0.15965849029406112	0.00201494370118149	0.15715660724189662	0.16216037334622563	0.047127072289998975
mee-type_gan_maxabs_100.csv	gaussian_nb	0.07954545454545454	0.0	0.07954545454545454	0.07954545454545454	0.006420076597460189	0.00020705376479821967	0.006162985392017689	0.006677167802902689	0.10815554981565616
mee-type_gan_maxabs_100.csv	svm_rbf_1	0.4	0.0050819726761359065	0.39368989748818684	0.4063101025118132	0.1709799807421306	0.0035208593376515832	0.16660825645982907	0.17535170502443215	0.050565299038931685
mee-type_gan_maxabs_100.csv	svm_rbf_2	0.5727272727272728	0.02064307059611928	0.5470955151556927	0.5983590302988528	0.5143777747879915	0.031324137301837536	0.4754837212255082	0.5532718283504748	0.0385525060281842
mee-type_gan_maxabs_100.csv	svm_rbf_3	0.3977272727272727	0.0	0.3977272727272727	0.3977272727272727	0.15818698347107438	0.0	0.15818698347107438	0.15818698347107438	0.047302060601001776
mee-type_gan_maxabs_100.csv	svm_rbf_auto	0.3977272727272727	0.0	0.3977272727272727	0.3977272727272727	0.15818698347107438	0.0	0.15818698347107438	0.15818698347107438	0.048288916973753614
mee-type_gan_maxabs_100.csv	svm_rbf_bal	0.4	0.0050819726761359065	0.39368989748818684	0.4063101025118132	0.1709799807421306	0.0035208593376515832	0.16660825645982907	0.17535170502443215	0.05066823885132895
mee-type_gan_maxabs_100.csv	svm_sigmoid	0.3977272727272727	0.0	0.3977272727272727	0.3977272727272727	0.15818698347107438	0.0	0.15818698347107438	0.15818698347107438	0.04419906666702792
mee-type_gan_maxabs_100.csv	svm_sigmoid_bal	0.3977272727272727	0.0	0.3977272727272727	0.3977272727272727	0.15818698347107438	0.0	0.15818698347107438	0.15818698347107438	0.04419647629171607
mee-type_gan_maxabs_100.csv	svm_poly_3	0.3977272727272727	0.0	0.3977272727272727	0.3977272727272727	0.15818698347107438	0.0	0.15818698347107438	0.15818698347107438	0.0426396323106092
mee-type_gan_maxabs_100.csv	svm_poly_4	0.3977272727272727	0.0	0.3977272727272727	0.3977272727272727	0.15818698347107438	0.0	0.15818698347107438	0.15818698347107438	0.0456979559272772
mee-type_gan_maxabs_100.csv	mlp_50_lr0.001	0.5659090909090908	0.04502639262763399	0.5100014402143702	0.6218167416038114	0.6228777410832765	0.0746641332732766	0.530169974840761	0.7155855073257921	0.03444840019296397
mee-type_gan_maxabs_100.csv	mlp_100_lr0.001	0.5931818181818181	0.031532811194344576	0.5540286617596437	0.6323349746039926	0.6904541829208756	0.0316077866251858	0.6512079322054758	0.7297004336362753	0.032373114358832056
mee-type_gan_maxabs_100.csv	mlp_50x2_lr0.001	0.6136363636363636	0.05081972676135886	0.5505353385182319	0.6767373887544954	0.6736677590086682	0.05233264425288841	0.6086881987090513	0.738647319308285	0.03492491331739961
mee-type_gan_maxabs_100.csv	mlp_128_64	0.6613636363636364	0.03446761565477977	0.6185664389011718	0.704160833826101	0.7092693456348147	0.013843675103268541	0.6920801526562563	0.7264585386133731	0.0333584167375055
mee-type_gan_maxabs_100.csv	mlp_128_64_es	0.48636363636363633	0.021858390979171978	0.4592228592261365	0.5135044135011362	0.44112319611276174	0.05747630334544021	0.36975693949888994	0.5124894527266335	0.038577158385655105
mee-type_gan_maxabs_100.csv	mlp_128_64_alpha	0.6545454545454545	0.024896479886598436	0.6236323917882611	0.685458517302648	0.7035294712552114	0.03979370406812261	0.6541190615586487	0.752939880951774	0.033420472833486606
mee-type_gan_maxabs_1000.csv	logistic_l2_1	0.38461538461538464	0.0	0.38461538461538464	0.38461538461538464	0.14792899408284024	0.0	0.14792899408284024	0.14792899408284024	0.04879350322317731
mee-type_gan_maxabs_1000.csv	logistic_l2_2	0.38461538461538464	0.0	0.38461538461538464	0.38461538461538464	0.14792899408284024	0.0	0.14792899408284024	0.14792899408284024	0.0488568307344908
mee-type_gan_maxabs_1000.csv	logistic_l2_3	0.38461538461538464	0.0	0.38461538461538464	0.38461538461538464	0.14792899408284024	0.0	0.14792899408284024	0.14792899408284024	0.048786826025895444
mee-type_gan_maxabs_1000.csv	logistic_l1_1	0.38461538461538464	0.0	0.38461538461538464	0.38461538461538464	0.14792899408284024	0.0	0.14792899408284024	0.14792899408284024	0.04883407182381608
mee-type_gan_maxabs_1000.csv	logistic_l1_2	0.38461538461538464	0.0	0.38461538461538464	0.38461538461538464	0.14792899408284024	0.0	0.14792899408284024	0.14792899408284024	0.049277712116376916
mee-type_gan_maxabs_1000.csv	logistic_l1_3	0.38461538461538464	0.0	0.38461538461538464	0.38461538461538464	0.14792899408284024	0.0	0.14792899408284024	0.14792899408284024	0.04879089866835603
mee-type_gan_maxabs_1000.csv	logistic_l2_balanced_1	0.38461538461538464	0.0	0.38461538461538464	0.38461538461538464	0.14792899408284024	0.0	0.14792899408284024	0.14792899408284024	0.048793486524448204
mee-type_gan_maxabs_1000.csv	logistic_l1_balanced_1	0.38461538461538464	0.0	0.38461538461538464	0.38461538461538464	0.14792899408284024	0.0	0.14792899408284024	0.14792899408284024	0.048834074034535824
mee-type_gan_maxabs_1000.csv	rf_100_10	0.389010989010989	0.006018929203353452	0.38153750131144776	0.3964844767105303	0.156174753937613	0.012138296189547988	0.1411030685595173	0.17124643931570868	0.04353240156268018
mee-type_gan_maxabs_1000.csv	rf_100_20	0.5648351648351648	0.04007600555782519	0.5150742315421992	0.6145960981281304	0.514289493486818	0.09247699804509055	0.3994641343522689	0.629114852621367	0.03339528196481735
mee-type_gan_maxabs_1000.csv	rf_200_10	0.3868131868131868	0.004914435115384136	0.380711109658906	0.3929152639674677	0.15265332957640648	0.010563935312129182	0.1395364714199822	0.16577018773283075	0.04329252606666583
mee-type_gan_maxabs_1000.csv	rf_200_20	0.5802197802197803	0.030493267968157392	0.5423573871961391	0.6180821732434214	0.5885001624153171	0.07477451842156646	0.4956553349082337	0.6813449899224004	0.03279278171126608
mee-type_gan_maxabs_1000.csv	rf_bal_100_10	0.3912087912087912	0.006018929203353452	0.38373530350924995	0.39868227890833247	0.17341974265051188	0.03179036420636952	0.1339467919256772	0.21289269337534655	0.04308459673225226
mee-type_gan_maxabs_1000.csv	rf_bal_200_20	0.589010989010989	0.02529860314993699	0.5575986242748678	0.6204233537471102	0.604754737175903	0.05386745278155652	0.5378694603821029	0.6716400139697031	0.03284845869705606
mee-type_gan_maxabs_1000.csv	decision_tree	0.44835164835164837	0.028444349682516	0.41303332339854953	0.4836699733047472	0.46618789823621753	0.056720997669318735	0.3957594774880247	0.5366163189844103	0.06489980607627666
mee-type_gan_maxabs_1000.csv	decision_tree_bal	0.44835164835164837	0.02623590414574357	0.41577547071355364	0.4809278259897431	0.4552423807288875	0.10153726231553316	0.329167217635518	0.5813175438222571	0.06489980607627667
mee-type_gan_maxabs_1000.csv	extra_tree	0.621978021978022	0.025298603149937027	0.5905656572419008	0.6533903867141432	0.6624265848672433	0.04781899484911286	0.6030514605328084	0.7218017092016781	0.030612178409825462
mee-type_gan_maxabs_1000.csv	extra_tree_bal	0.6527472527472529	0.03931548092307323	0.6039306355130059	0.7015638699814999	0.6984328323793408	0.023148616533428108	0.6696900286215587	0.727175636137123	0.03018218487394958
mee-type_gan_maxabs_1000.csv	lda	0.38461538461538464	0.0	0.38461538461538464	0.38461538461538464	0.14792899408284024	0.0	0.14792899408284024	0.14792899408284024	0.04939685198673277
mee-type_gan_maxabs_1000.csv	gaussian_nb	0.38901098901098907	0.009828870230768297	0.3768068347024273	0.4012151433195508	0.15698156838740393	0.020242171516372302	0.1318475927700587	0.18211554400474916	0.05664485080556857
mee-type_gan_maxabs_1000.csv	svm_rbf_1	0.38461538461538464	0.0	0.38461538461538464	0.38461538461538464	0.14792899408284024	0.0	0.14792899408284024	0.14792899408284024	0.05485186020567363
mee-type_gan_maxabs_1000.csv	svm_rbf_2	0.531868131868132	0.02646504303031273	0.4990074407264792	0.5647288230097848	0.4582142991143064	0.05148093090106067	0.3942922806204436	0.5221363176081693	0.041937091489416545
mee-type_gan_maxabs_1000.csv	svm_rbf_3	0.38461538461538464	0.0	0.38461538461538464	0.38461538461538464	0.14792899408284024	0.0	0.14792899408284024	0.14792899408284024	0.07046327175800053
mee-type_gan_maxabs_1000.csv	svm_rbf_auto	0.38461538461538464	0.0	0.38461538461538464	0.38461538461538464	0.14792899408284024	0.0	0.14792899408284024	0.14792899408284024	0.05725420339598837
mee-type_gan_maxabs_1000.csv	svm_rbf_bal	0.38461538461538464	0.0	0.38461538461538464	0.38461538461538464	0.14792899408284024	0.0	0.14792899408284024	0.14792899408284024	0.054800186069656864
mee-type_gan_maxabs_1000.csv	svm_sigmoid	0.38461538461538464	0.0	0.38461538461538464	0.38461538461538464	0.14959506305660153	0.0020589116311298308	0.14703858660874464	0.15215153950445842	0.05419139566862041
mee-type_gan_maxabs_1000.csv	svm_sigmoid_bal	0.38461538461538464	0.0	0.38461538461538464	0.38461538461538464	0.14959506305660153	0.0020589116311298308	0.14703858660874464	0.15215153950445842	0.05420586283574643
mee-type_gan_maxabs_1000.csv	svm_poly_3	0.38461538461538464	0.0	0.38461538461538464	0.38461538461538464	0.14792899408284024	0.0	0.14792899408284024	0.14792899408284024	0.06601623485471073
mee-type_gan_maxabs_1000.csv	svm_poly_4	0.38461538461538464	0.0	0.38461538461538464	0.38461538461538464	0.14792899408284024	0.0	0.14792899408284024	0.14792899408284024	0.07017425540412381
mee-type_gan_maxabs_1000.csv	mlp_50_lr0.001	0.5604395604395604	0.013458734850457019	0.5437283339143776	0.5771507869647433	0.6261763584759706	0.05692944595697275	0.5554891149935106	0.6968636019584307	0.03744229285771129
mee-type_gan_maxabs_1000.csv	mlp_100_lr0.001	0.6549450549450548	0.024075716813413858	0.6250511041468897	0.68483900574322	0.7091105428290824	0.03069642804750759	0.6709958932490399	0.7472251924091249	0.030698845492477624
mee-type_gan_maxabs_1000.csv	mlp_50x2_lr0.001	0.567032967032967	0.04889801200282855	0.5063180659453191	0.6277478681206149	0.5794080187903383	0.06043170125054801	0.5043721509973274	0.6544438865833493	0.0403954909273877
mee-type_gan_maxabs_1000.csv	mlp_128_64	0.6417582417582418	0.04368045475681713	0.5875217936615336	0.69599468985495	0.6721906232410435	0.06294258519955978	0.5940370812448769	0.7503441652372101	0.03282792298689193
mee-type_gan_maxabs_1000.csv	mlp_128_64_es	0.4769230769230769	0.036113575220120854	0.4320821507258292	0.5217640031203247	0.4509488638561037	0.015956590624826857	0.4311361397431805	0.47076158796902695	0.03928432262661458
mee-type_gan_maxabs_1000.csv	mlp_128_64_alpha	0.6307692307692307	0.056888699365032026	0.560132580863033	0.7014058806754285	0.7041420778848058	0.08634598802109965	0.5969293731696727	0.8113547825999389	0.03345143280463682
mee-type_gan_maxabs_10000.csv	logistic_l2_1	0.04835164835164836	0.006018929203353471	0.04087816065210708	0.05582513605118964	0.38592225338807146	7.935284909199328e-05	0.38582372381219904	0.3860207829639439	0.05544065655883921
mee-type_gan_maxabs_10000.csv	logistic_l2_2	0.04835164835164836	0.006018929203353471	0.04087816065210708	0.05582513605118964	0.38591781338363146	8.572382185248142e-05	0.3858113732002488	0.38602425356701414	0.05544055863850241
mee-type_gan_maxabs_10000.csv	logistic_l2_3	0.04835164835164836	0.006018929203353471	0.04087816065210708	0.05582513605118964	0.38592225338807146	7.935284909199328e-05	0.38582372381219904	0.3860207829639439	0.055440603114554746
mee-type_gan_maxabs_10000.csv	logistic_l1_1	0.04835164835164836	0.006018929203353471	0.04087816065210708	0.05582513605118964	0.38592225338807146	7.935284909199328e-05	0.38582372381219904	0.3860207829639439	0.05544273734724424
mee-type_gan_maxabs_10000.csv	logistic_l1_2	0.04835164835164836	0.006018929203353471	0.04087816065210708	0.05582513605118964	0.38592686093984885	7.357937448737403e-05	0.38583550007953754	0.38601822180016016	0.05546218399939261
mee-type_gan_maxabs_10000.csv	logistic_l1_3	0.04835164835164836	0.006018929203353471	0.04087816065210708	0.05582513605118964	0.38592225338807146	7.935284909199328e-05	0.38582372381219904	0.3860207829639439	0.0554407334288088
mee-type_gan_maxabs_10000.csv	logistic_l2_balanced_1	0.04835164835164836	0.006018929203353471	0.04087816065210708	0.05582513605118964	0.38592225338807146	7.935284909199328e-05	0.38582372381219904	0.3860207829639439	0.05544061732865786
mee-type_gan_maxabs_10000.csv	logistic_l1_balanced_1	0.04835164835164836	0.006018929203353471	0.04087816065210708	0.05582513605118964	0.38592225338807146	7.935284909199328e-05	0.38582372381219904	0.3860207829639439	0.05544273735614079
mee-type_gan_maxabs_10000.csv	rf_100_10	0.2	0.1541206342674986	0.008633957049717256	0.39136604295028277	0.10432800496117137	0.1388981127657781	-0.06813678107854229	0.27679279100088505	0.05511184590564085
mee-type_gan_maxabs_10000.csv	rf_100_20	0.3912087912087912	0.006018929203353452	0.38373530350924995	0.39868227890833247	0.16523340490198893	0.01488895085434169	0.14674633065512765	0.1837204791488502	0.04336579269379327
mee-type_gan_maxabs_10000.csv	rf_200_10	0.16923076923076924	0.12374231437590548	0.01558439241579504	0.32287714604574347	0.13319459608956916	0.169286639263303	-0.07700252926058238	0.3433917214397207	0.05509511071741624
mee-type_gan_maxabs_10000.csv	rf_200_20	0.4	0.006018929203353483	0.3925265123004587	0.40747348769954134	0.20367201462707082	0.04407377111488637	0.14894719976864335	0.2583968294854983	0.0429504593620252
mee-type_gan_maxabs_10000.csv	rf_bal_100_10	0.16483516483516483	0.12408340429270567	0.010765268950349516	0.31890506071998015	0.09454844498176103	0.10663888904538563	-0.03786122435434032	0.2269581143178624	0.055096711485542495
mee-type_gan_maxabs_10000.csv	rf_bal_200_20	0.3912087912087912	0.006018929203353452	0.38373530350924995	0.39868227890833247	0.16902413825490747	0.0228906394986962	0.1406016552935153	0.19744662121629966	0.04341518142007249
mee-type_gan_maxabs_10000.csv	decision_tree	0.3362637362637363	0.11141795037922264	0.19792007852420185	0.47460739400327073	0.3392273635750372	0.10449249083494462	0.20948279962264943	0.46897192752742495	0.07808661926308985
mee-type_gan_maxabs_10000.csv	decision_tree_bal	0.34065934065934067	0.10396092268365109	0.21157480574300583	0.46974387557567554	0.3476865994084025	0.12680477026209744	0.19023768137345654	0.5051355174433485	0.07756948933419523
mee-type_gan_maxabs_10000.csv	extra_tree	0.6197802197802198	0.034401045807689046	0.5770656797002537	0.6624947598601859	0.6029522041371063	0.05374647174103256	0.53621714514579	0.6696872631284225	0.031199146735617328
mee-type_gan_maxabs_10000.csv	extra_tree_bal	0.6087912087912087	0.04007600555782519	0.5590302754982431	0.6585521420841743	0.5828539345728369	0.062311938361229245	0.5054834440514063	0.6602244250942674	0.031047963800904976
mee-type_gan_maxabs_10000.csv	lda	0.04175824175824176	0.00919406622564918	0.03034230072875199	0.05317418278773153	0.38588611867975625	6.583216408560994e-05	0.3858043772516873	0.3859678601078252	0.05568216883035361
mee-type_gan_maxabs_10000.csv	gaussian_nb	0.0989010989010989	0.0	0.0989010989010989	0.0989010989010989	0.009781427363844946	0.0	0.009781427363844946	0.009781427363844946	0.06446066327790068
mee-type_gan_maxabs_10000.csv	svm_rbf_1	0.38461538461538464	0.0	0.38461538461538464	0.38461538461538464	0.14792899408284024	0.0	0.14792899408284024	0.14792899408284024	0.06384294642148884
mee-type_gan_maxabs_10000.csv	svm_rbf_2	0.49010989010989015	0.012529400275814706	0.4745525848683267	0.5056671953514537	0.3693322202303144	0.018491152313446692	0.3463724221174054	0.39229201834322347	0.04708278642316717
mee-type_gan_maxabs_10000.csv	svm_rbf_3	0.38461538461538464	0.0	0.38461538461538464	0.38461538461538464	0.14792899408284024	0.0	0.14792899408284024	0.14792899408284024	0.07121240353888877
mee-type_gan_maxabs_10000.csv	svm_rbf_auto	0.38461538461538464	0.0	0.38461538461538464	0.38461538461538464	0.14792899408284024	0.0	0.14792899408284024	0.14792899408284024	0.06429766682990777
mee-type_gan_maxabs_10000.csv	svm_rbf_bal	0.38461538461538464	0.0	0.38461538461538464	0.38461538461538464	0.14792899408284024	0.0	0.14792899408284024	0.14792899408284024	0.06377899369221411
mee-type_gan_maxabs_10000.csv	svm_sigmoid	0.14505494505494504	0.014327917374071755	0.1272644858823219	0.16284540422756819	0.29178295668399984	0.031064369385114633	0.25321144759159975	0.33035446577639993	0.05542358200552533
mee-type_gan_maxabs_10000.csv	logistic_l2_1	0.04835164835164836	0.006018929203353471	0.04087816065210708	0.05582513605118964	0.38592225338807146	7.935284909199328e-05	0.38582372381219904	0.3860207829639439	0.05544064250364413
mee-type_gan_maxabs_10000.csv	logistic_l2_2	0.04835164835164836	0.006018929203353471	0.04087816065210708	0.05582513605118964	0.38591781338363146	8.572382185248142e-05	0.3858113732002488	0.38602425356701414	0.055440714250888104
mee-type_gan_maxabs_10000.csv	logistic_l2_3	0.04835164835164836	0.006018929203353471	0.04087816065210708	0.05582513605118964	0.38592225338807146	7.935284909199328e-05	0.38582372381219904	0.3860207829639439	0.05544058503202026
mee-type_gan_maxabs_10000.csv	logistic_l1_1	0.04835164835164836	0.006018929203353471	0.04087816065210708	0.05582513605118964	0.38592225338807146	7.935284909199328e-05	0.38582372381219904	0.3860207829639439	0.05544273694862191
mee-type_gan_maxabs_10000.csv	logistic_l1_2	0.04835164835164836	0.006018929203353471	0.04087816065210708	0.05582513605118964	0.38592686093984885	7.357937448737403e-05	0.38583550007953754	0.38601822180016016	0.05546218468301839
mee-type_gan_maxabs_10000.csv	logistic_l1_3	0.04835164835164836	0.006018929203353471	0.04087816065210708	0.05582513605118964	0.38592225338807146	7.935284909199328e-05	0.38582372381219904	0.3860207829639439	0.055440732882999486
mee-type_gan_maxabs_10000.csv	logistic_l2_balanced_1	0.04835164835164836	0.006018929203353471	0.04087816065210708	0.05582513605118964	0.38592225338807146	7.935284909199328e-05	0.38582372381219904	0.3860207829639439	0.0554406110025679
mee-type_gan_maxabs_10000.csv	logistic_l1_balanced_1	0.04835164835164836	0.006018929203353471	0.04087816065210708	0.05582513605118964	0.38592225338807146	7.935284909199328e-05	0.38582372381219904	0.3860207829639439	0.055442736373032674
mee-type_gan_maxabs_10000.csv	rf_100_10	0.15824175824175826	0.08777461779215763	0.049255175373140364	0.2672283411103762	0.11939879478503417	0.1476440873082079	-0.06392555297322124	0.3027231425432896	0.05511221691752181
mee-type_gan_maxabs_10000.csv	rf_100_20	0.39780219780219783	0.01432791737407175	0.3800117386295747	0.41559265697482095	0.17473359973359975	0.026026023018453505	0.1424180239351635	0.207049175532036	0.043096536780386906
mee-type_gan_maxabs_10000.csv	rf_200_10	0.2681318681318681	0.10149230671664895	0.1421125247871508	0.39415121147658544	0.2241951099667899	0.12819161068606677	0.06502420210614757	0.38336601782743224	0.054991723251463745
mee-type_gan_maxabs_10000.csv	rf_200_20	0.3934065934065934	0.004914435115384135	0.38730451625231255	0.39950867056087425	0.17265695986525717	0.016480137629472542	0.15219416628529794	0.1931197534452164	0.043600597028561026
mee-type_gan_maxabs_10000.csv	rf_bal_100_10	0.189010989010989	0.1355707297871748	0.02067769462404309	0.3573442833979349	0.26162725806747417	0.15164556347052827	0.07333442141879501	0.44992009471615335	0.055090342606875266
mee-type_gan_maxabs_10000.csv	rf_bal_200_20	0.3956043956043956	0.013458734850457019	0.3788931690792128	0.4123156221295784	0.18470861324070306	0.043629777899649405	0.13053508877308206	0.23888213770832406	0.04325179764845637
mee-type_gan_maxabs_10000.csv	decision_tree	0.3516483516483516	0.13834811331883703	0.17986648012093667	0.5234302231757666	0.35963653917142285	0.14769894555980967	0.17624407589714913	0.5430290024456965	0.07627666451195864
mee-type_gan_maxabs_10000.csv	decision_tree_bal	0.34725274725274724	0.12447207683203623	0.19270025066875474	0.5018052438367397	0.3483511665379797	0.1289866793660721	0.18819305052127533	0.5085092825546841	0.07679379444085327
mee-type_gan_maxabs_10000.csv	extra_tree	0.6065934065934067	0.033331320633193634	0.5652071057505837	0.6479797074362296	0.5775021897786881	0.05732862410288385	0.5063193011635805	0.6486850783937956	0.0312746218487395
mee-type_gan_maxabs_10000.csv	extra_tree_bal	0.6065934065934065	0.04284305206509432	0.5533967312710094	0.6597900819158037	0.5921651490345006	0.043946765705715256	0.537598032220218	0.6467322658487832	0.03113840982546865
mee-type_gan_maxabs_10000.csv	lda	0.04175824175824176	0.00919406622564918	0.03034230072875199	0.05317418278773153	0.38588611867975625	6.583216408560994e-05	0.3858043772516873	0.3859678601078252	0.055682168830353596
mee-type_gan_maxabs_10000.csv	gaussian_nb	0.0989010989010989	0.0	0.0989010989010989	0.0989010989010989	0.009781427363844946	0.0	0.009781427363844946	0.009781427363844946	0.06446066327790068
mee-type_gan_maxabs_10000.csv	svm_rbf_1	0.38461538461538464	0.0	0.38461538461538464	0.38461538461538464	0.14792899408284024	0.0	0.14792899408284024	0.14792899408284024	0.06380792654835574
mee-type_gan_maxabs_10000.csv	svm_rbf_2	0.49010989010989015	0.012529400275814706	0.4745525848683267	0.5056671953514537	0.3693322202303144	0.018491152313446692	0.3463724221174054	0.39229201834322347	0.047120685073993654
mee-type_gan_maxabs_10000.csv	svm_rbf_3	0.38461538461538464	0.0	0.38461538461538464	0.38461538461538464	0.14792899408284024	0.0	0.14792899408284024	0.14792899408284024	0.07121283785434811
mee-type_gan_maxabs_10000.csv	svm_rbf_auto	0.38461538461538464	0.0	0.38461538461538464	0.38461538461538464	0.14792899408284024	0.0	0.14792899408284024	0.14792899408284024	0.06419538979228226
mee-type_gan_maxabs_10000.csv	svm_rbf_bal	0.38461538461538464	0.0	0.38461538461538464	0.38461538461538464	0.14792899408284024	0.0	0.14792899408284024	0.14792899408284024	0.06387357689065262
mee-type_smote_maxabs_1000.csv	logistic_l2_1	0.6373626373626373	0.0	0.6373626373626373	0.6373626373626373	0.7006071924791136	0.0042123729560435	0.6953768406325872	0.70583754432564	0.0293437696265777
mee-type_smote_maxabs_1000.csv	logistic_l2_2	0.6065934065934065	0.0049144351153841	0.6004913294391256	0.6126954837476875	0.7147906855049712	0.0044321158880909	0.7092874867708617	0.7202938842390806	0.0281631984688952
mee-type_smote_maxabs_1000.csv	logistic_l2_3	0.6417582417582417	0.0098288702307683	0.6295540874496799	0.6539623960668035	0.6500097700558529	0.0051579808931132	0.6436052908774513	0.6564142492342545	0.0312996944628692
mee-type_smote_maxabs_1000.csv	logistic_l1_1	0.6197802197802198	0.0098288702307683	0.607576065471658	0.6319843740887816	0.6450870558013415	0.006135116742709	0.6374693022171426	0.6527048093855404	0.0351659500223791
mee-type_smote_maxabs_1000.csv	logistic_l1_2	0.5560439560439561	0.0060189292033534	0.5485704683444148	0.5635174437434973	0.6816524216524217	0.0052284911098697	0.6751603924763679	0.6881444508284754	0.034767103571982
mee-type_smote_maxabs_1000.csv	logistic_l1_3	0.6439560439560439	0.0060189292033535	0.6364825562565025	0.6514295316555853	0.6678123557115154	0.0126767569157093	0.6520720830352985	0.6835526283877323	0.0358388687006077
mee-type_smote_maxabs_1000.csv	logistic_l2_balanced_1	0.6373626373626373	0.0	0.6373626373626373	0.6373626373626373	0.7006071924791136	0.0042123729560435	0.6953768406325872	0.70583754432564	0.029344429251403
mee-type_smote_maxabs_1000.csv	logistic_l1_balanced_1	0.6197802197802198	0.0098288702307683	0.607576065471658	0.6319843740887816	0.6450870558013415	0.006135116742709	0.6374693022171426	0.6527048093855404	0.0351645443700647
mee-type_smote_maxabs_1000.csv	rf_100_10	0.7296703296703297	0.0060189292033535	0.7221968419707884	0.7371438173698711	0.7228154952637447	0.0242960915306471	0.6926479131130766	0.7529830774144127	0.0271959202300987
mee-type_smote_maxabs_1000.csv	rf_100_20	0.6989010989010989	0.0183881324512983	0.6760692168421193	0.7217329809600784	0.6897081002026058	0.0218728113276703	0.662549417837534	0.7168667825676776	0.0271865029088558
mee-type_smote_maxabs_1000.csv	rf_200_10	0.7164835164835166	0.0238236081194272	0.6869025999743088	0.7460644329927244	0.7101839463032922	0.0320104061492079	0.6704377774199403	0.7499301151866441	0.0271098748722959
mee-type_smote_maxabs_1000.csv	rf_200_20	0.7252747252747254	0.0205585570701864	0.6997479051056573	0.7508015454437934	0.6914026741304266	0.0384904277732299	0.6436104956889445	0.7391948525719086	0.0268559793148028
mee-type_smote_maxabs_1000.csv	rf_bal_100_10	0.7186813186813188	0.0125294002758146	0.7031240134397554	0.7342386239228822	0.7120343716254782	0.0324771508495717	0.6717086626513321	0.7523600805996243	0.0271592715709443
mee-type_smote_maxabs_1000.csv	rf_bal_200_20	0.7186813186813188	0.0275821986769475	0.6844334955928495	0.7529291417697881	0.6965144946770297	0.0299649804417028	0.6593080572556874	0.7337209320983721	0.0268013057530704
mee-type_smote_maxabs_1000.csv	decision_tree	0.5582417582417583	0.0304932679681573	0.5203793652181171	0.5961041512653994	0.5140196667855226	0.0713187800721918	0.4254657051740697	0.6025736283969755	0.0519715578539107
mee-type_smote_maxabs_1000.csv	decision_tree_bal	0.567032967032967	0.0214215260325471	0.5404346293717684	0.5936313046941656	0.5247388465598459	0.0423496415336369	0.4721548213306939	0.5773228717889979	0.0509372979961215
mee-type_smote_maxabs_1000.csv	extra_tree	0.7252747252747254	0.025771515163865	0.6932751627165917	0.757274287832859	0.7563179290705423	0.0143005809149027	0.7385614125951077	0.7740744455459769	0.0273329799612152
mee-type_smote_maxabs_1000.csv	extra_tree_bal	0.7142857142857143	0.0190335253578997	0.6906524710899118	0.7379189574815168	0.7542845946847928	0.0303166274118479	0.7166415298805437	0.7919276594890419	0.0273106916612798
mee-type_smote_maxabs_1000.csv	lda	0.4813186813186813	0.0294866106923049	0.444706218392996	0.5179311442443665	0.5888492693114542	0.0490413752801321	0.527956359203714	0.6497421794191944	0.0601859851494505
mee-type_smote_maxabs_1000.csv	gaussian_nb	0.3516483516483517	0.0	0.3516483516483517	0.3516483516483517	0.1519468186134852	0.0	0.1519468186134852	0.1519468186134852	0.0762766645119586
mee-type_smote_maxabs_1000.csv	svm_rbf_1	0.7098901098901099	0.0060189292033534	0.7024166221905687	0.7173635975896512	0.7522709356695529	0.0171696133479386	0.7309520449123387	0.7735898264267672	0.025952676676263
mee-type_smote_maxabs_1000.csv	svm_rbf_2	0.7032967032967034	0.0	0.7032967032967034	0.7032967032967034	0.692950718749038	0.0027793290733132	0.689499725899544	0.696401711598532	0.0269667814455892
mee-type_smote_maxabs_1000.csv	svm_rbf_3	0.6945054945054945	0.0049144351153841	0.6884034173512136	0.7006075716597754	0.8028807809595986	0.0016381450384614	0.800846755241505	0.8049148066776922	0.0241061978853957
mee-type_smote_maxabs_1000.csv	svm_rbf_auto	0.7076923076923077	0.0060189292033534	0.7002188199927665	0.715165795391849	0.7961130659160215	0.0104346045202841	0.7831567931476905	0.8090693386843525	0.0240274247701348
mee-type_smote_maxabs_1000.csv	svm_rbf_bal	0.7098901098901099	0.0060189292033534	0.7024166221905687	0.7173635975896512	0.7522709356695529	0.0171696133479386	0.7309520449123387	0.7735898264267672	0.0259811442227571
mee-type_smote_maxabs_1000.csv	svm_sigmoid	0.6637362637362637	0.0060189292033534	0.6562627760367225	0.671209751435805	0.7642072213500783	0.0048724664979528	0.7581572551171164	0.7702571875830403	0.0269718713598641
mee-type_smote_maxabs_1000.csv	svm_sigmoid_bal	0.6637362637362637	0.0060189292033534	0.6562627760367225	0.671209751435805	0.7642072213500783	0.0048724664979528	0.7581572551171164	0.7702571875830403	0.0269221250668188
mee-type_smote_maxabs_1000.csv	svm_poly_3	0.7120879120879121	0.0091940662256491	0.7006719710584224	0.7235038531174018	0.7094938394938395	0.0118767956695853	0.694746849896893	0.724240829090786	0.0271682710179549
mee-type_smote_maxabs_1000.csv	svm_poly_4	0.7186813186813187	0.0060189292033534	0.7112078309817774	0.7261548063808599	0.724667475381761	0.0191887215324886	0.7008415306833125	0.7484934200802096	0.0274414385345388
mee-type_smote_maxabs_1000.csv	mlp_50_lr0.001	0.6857142857142857	0.0125294002758147	0.6701569804727222	0.7012715909558492	0.6737912493168423	0.0429858414834477	0.6204172775143513	0.7271652211193333	0.0317269098737526
mee-type_smote_maxabs_1000.csv	mlp_100_lr0.001	0.7186813186813188	0.0199625298072362	0.693894564106604	0.7434680732560336	0.7206945474495571	0.011377545147514	0.7065674592519509	0.7348216356471633	0.0291963725359918
mee-type_smote_maxabs_1000.csv	mlp_50x2_lr0.001	0.6945054945054945	0.0414097663327841	0.643088478476046	0.745922510534943	0.6771934800174517	0.0331058881528134	0.6360870905695426	0.7182998694653608	0.0322887625340549
mee-type_smote_maxabs_1000.csv	mlp_128_64	0.7142857142857143	0.0280165907340263	0.6794985222188646	0.749072906352564	0.6841848704601741	0.0353919349349653	0.6402399790246573	0.7281297618956908	0.0299116759257317
mee-type_smote_maxabs_1000.csv	mlp_128_64_es	0.6923076923076923	0.0300946460167673	0.6549402538099859	0.7296751308053987	0.6979786739870775	0.0398757123377404	0.6484664375745753	0.7474909103995796	0.0305768507297404
mee-type_smote_maxabs_1000.csv	mlp_128_64_alpha	0.6857142857142857	0.025298603149937	0.6543019209781645	0.7171266504504069	0.65888509019365	0.0293783046101958	0.6224071070309062	0.6953630733563939	0.0318979138107835
mee-type_smote_maxabs_2000.csv	logistic_l2_1	0.6417582417582417	0.0060189292033535	0.6342847540587003	0.6492317294577831	0.6602202866258166	0.0169889931101356	0.6391256655152292	0.6813149077364039	0.0299218095893162
mee-type_smote_maxabs_2000.csv	logistic_l2_2	0.6263736263736264	0.0077704041888631	0.6167253952408233	0.6360218575064295	0.7383542647828362	0.0162887352008611	0.7181291287076524	0.7585794008580199	0.0279205183666879
mee-type_smote_maxabs_2000.csv	logistic_l2_3	0.6483516483516484	0.0	0.6483516483516484	0.6483516483516484	0.6420395664093143	0.0064531165439067	0.634026963920532	0.6500521688980965	0.0317040492649711
mee-type_smote_maxabs_2000.csv	logistic_l1_1	0.6131868131868132	0.0120378584067069	0.5982398377877306	0.6281337885858959	0.6457012457588495	0.0128130986711024	0.629791682433509	0.6616108090841899	0.0360743154286781
mee-type_smote_maxabs_2000.csv	logistic_l1_2	0.5736263736263736	0.0049144351153841	0.5675242964720927	0.5797284507806545	0.7211669283097855	0.0	0.7211669283097855	0.7211669283097855	0.0359347952946673
mee-type_smote_maxabs_2000.csv	logistic_l1_3	0.6483516483516484	0.0	0.6483516483516484	0.6483516483516484	0.6888410985696054	0.0087426858266301	0.6779856203310725	0.6996965768081383	0.0365972303165774
mee-type_smote_maxabs_2000.csv	logistic_l2_balanced_1	0.6417582417582417	0.0060189292033535	0.6342847540587003	0.6492317294577831	0.6602202866258166	0.0169889931101356	0.6391256655152292	0.6813149077364039	0.0299215654250763
mee-type_smote_maxabs_2000.csv	logistic_l1_balanced_1	0.6131868131868132	0.0120378584067069	0.5982398377877306	0.6281337885858959	0.6457012457588495	0.0128130986711024	0.629791682433509	0.6616108090841899	0.0360776403880641
mee-type_smote_maxabs_2000.csv	rf_100_10	0.7032967032967032	0.0320381972244247	0.6635160272357832	0.7430773793576233	0.6909741329176546	0.0331748990188808	0.6497820551618648	0.7321662106734445	0.0271974700310389
mee-type_smote_maxabs_2000.csv	rf_100_20	0.7054945054945054	0.028444349682516	0.6701761805414066	0.7408128304476043	0.66829210905916	0.0745476975613579	0.5757289168482391	0.7608553012700809	0.0269243956043956
mee-type_smote_maxabs_2000.csv	rf_200_10	0.7032967032967034	0.013458734850457	0.6865854767715205	0.7200079298218862	0.704268988245477	0.036743607143619	0.6586457740911025	0.7498922023998515	0.0271479064663675
mee-type_smote_maxabs_2000.csv	rf_200_20	0.6879120879120879	0.0060189292033534	0.6804386002125467	0.6953855756116292	0.6846829910818399	0.026167043586969	0.6521923151204717	0.7171736670432082	0.0270093794440853
mee-type_smote_maxabs_2000.csv	rf_bal_100_10	0.6945054945054945	0.0143279173740717	0.6767150353328714	0.7122959536781176	0.663208094117882	0.0158685486393667	0.6435046885686349	0.682911499667129	0.0272473367630044
mee-type_smote_maxabs_2000.csv	rf_bal_200_20	0.7098901098901098	0.0183881324512983	0.6870582278311302	0.7327219919490894	0.6874906306077764	0.04189262459333	0.6354740668599728	0.73950719435558	0.0269738403779677
mee-type_smote_maxabs_2000.csv	decision_tree	0.5648351648351648	0.0422755693663106	0.5123431123494508	0.6173272173208788	0.5073251757471027	0.069349022713029	0.4212169909337192	0.5934333605604861	0.0511958629605688
mee-type_smote_maxabs_2000.csv	decision_tree_bal	0.5758241758241758	0.0316590336063471	0.5365142935772514	0.6151340580711001	0.5311561896321378	0.051185019027827	0.4676015942579102	0.5947107850063655	0.0499030381383322
mee-type_smote_maxabs_2000.csv	extra_tree	0.7318681318681319	0.025298603149937	0.7004557671320107	0.7632804966042531	0.736572295438894	0.0420065119786028	0.6844143218249477	0.7887302690528404	0.0265356690368455
mee-type_smote_maxabs_2000.csv	extra_tree_bal	0.7252747252747254	0.0190335253578997	0.7016414820789229	0.7489079684705279	0.7355929010081834	0.0235005982066233	0.7064130542787672	0.7647727477375996	0.0271013316095669
mee-type_smote_maxabs_2000.csv	lda	0.4681318681318681	0.0060189292033534	0.4606583804323269	0.4756053558314094	0.5215898011762674	0.0076059675048006	0.5121457451540488	0.5310338571984861	0.0615338296604642
mee-type_smote_maxabs_2000.csv	gaussian_nb	0.3516483516483517	0.0	0.3516483516483517	0.3516483516483517	0.1519468186134852	0.0	0.1519468186134852	0.1519468186134852	0.0762766645119586
mee-type_smote_maxabs_2000.csv	svm_rbf_1	0.7098901098901099	0.0060189292033534	0.7024166221905687	0.7173635975896512	0.7242382617382617	0.0194982587471607	0.7000279758242505	0.7484485476522729	0.0267567795153589
mee-type_smote_maxabs_2000.csv	svm_rbf_2	0.6923076923076923	0.0	0.6923076923076923	0.6923076923076923	0.6787109715681143	0.0	0.6787109715681143	0.6787109715681143	0.0279161063381335
mee-type_smote_maxabs_2000.csv	svm_rbf_3	0.7186813186813187	0.0060189292033534	0.7112078309817774	0.7261548063808599	0.8116667568884317	0.0047544377658374	0.805763342682891	0.8175701710939725	0.0236336144624126
mee-type_smote_maxabs_2000.csv	svm_rbf_auto	0.6703296703296703	0.0	0.6703296703296703	0.6703296703296703	0.726892155463584	0.0	0.726892155463584	0.726892155463584	0.0261121394152839
mee-type_smote_maxabs_2000.csv	svm_rbf_bal	0.7098901098901099	0.0060189292033534	0.7024166221905687	0.7173635975896512	0.7242382617382617	0.0194982587471607	0.7000279758242505	0.7484485476522729	0.026771041255155
mee-type_smote_maxabs_2000.csv	svm_sigmoid	0.6593406593406593	0.0077704041888631	0.6496924282078562	0.6689888904734624	0.7289185865010042	0.007431596788204	0.7196910403199245	0.7381461326820838	0.0261009601771284
mee-type_smote_maxabs_2000.csv	svm_sigmoid_bal	0.6593406593406593	0.0077704041888631	0.6496924282078562	0.6689888904734624	0.7289185865010042	0.007431596788204	0.7196910403199245	0.7381461326820838	0.0261282983567332
mee-type_smote_maxabs_2000.csv	svm_poly_3	0.7208791208791209	0.0060189292033534	0.7134056331795796	0.7283526085786621	0.7541075591075591	0.0032100955751218	0.7501216990011371	0.7580934192139811	0.0280880130853537
mee-type_smote_maxabs_2000.csv	svm_poly_4	0.7274725274725274	0.0049144351153841	0.7213704503182465	0.7335746046268083	0.7597276532990819	0.0032294859329667	0.7557177168834116	0.7637375897147521	0.0284485696303962
mee-type_smote_maxabs_2000.csv	mlp_50_lr0.001	0.665934065934066	0.0361135752201208	0.6210931397368182	0.7107749921313138	0.6796629503513796	0.0291100333653944	0.6435180699350589	0.7158078307677003	0.0336706039369224
mee-type_smote_maxabs_2000.csv	mlp_100_lr0.001	0.6769230769230768	0.0325986746685523	0.6364464761979783	0.7173996776481754	0.7142266090585417	0.0097732768311929	0.7020914830727705	0.726361735044313	0.0332485825016135
mee-type_smote_maxabs_2000.csv	mlp_50x2_lr0.001	0.6703296703296704	0.0190335253578997	0.6466964271338678	0.693962913525473	0.6940746219592373	0.0313252657297054	0.6551791672684958	0.7329700766499788	0.0366520414067643
mee-type_smote_maxabs_2000.csv	mlp_128_64	0.6989010989010989	0.0541703628301812	0.6316397096052273	0.7661624881969704	0.6773017504885637	0.0370745115938286	0.6312676641915185	0.7233358367856089	0.0321414569837993
mee-type_smote_maxabs_2000.csv	mlp_128_64_es	0.6791208791208792	0.0162993373342762	0.6588825787583298	0.6993591794834285	0.6899041868369599	0.0383056260622579	0.6423414700267983	0.7374669036471214	0.031764053011235
mee-type_smote_maxabs_2000.csv	mlp_128_64_alpha	0.6989010989010989	0.0286558347481435	0.6633201805558526	0.7344820172463451	0.696675936195975	0.046258167789883	0.6392388346284081	0.7541130377635419	0.0315092184247968
mee-type_smote_maxabs_5000.csv	logistic_l2_1	0.6461538461538461	0.0049144351153841	0.6400517689995652	0.652255923308127	0.6419353662210805	0.0032770422000484	0.6378663809006859	0.6460043515414751	0.0312135145164481
mee-type_smote_maxabs_5000.csv	logistic_l2_2	0.6263736263736264	0.0	0.6263736263736264	0.6263736263736264	0.6978948254810324	0.0	0.6978948254810324	0.6978948254810324	0.0288219568068753
mee-type_smote_maxabs_5000.csv	logistic_l2_3	0.6439560439560439	0.0060189292033535	0.6364825562565025	0.6514295316555853	0.6444756923748519	0.0043388072998924	0.6390883515554318	0.6498630331942721	0.0330032846677105
mee-type_smote_maxabs_5000.csv	logistic_l1_1	0.6175824175824176	0.0120378584067069	0.602635442183335	0.6325293929815002	0.647270703153056	0.0045957705037995	0.6415643003744814	0.6529771059316306	0.0369860861427955
mee-type_smote_maxabs_5000.csv	logistic_l1_2	0.5692307692307692	0.0049144351153841	0.5631286920764883	0.5753328463850501	0.6355677655677655	0.0024328659977057	0.6325469634459602	0.6385885676895708	0.0383675686813749
mee-type_smote_maxabs_5000.csv	logistic_l1_3	0.6483516483516484	0.0	0.6483516483516484	0.6483516483516484	0.6860899152560433	0.0093394926655183	0.6744934034517811	0.6976864270603056	0.0375905738350212
mee-type_smote_maxabs_5000.csv	logistic_l2_balanced_1	0.6461538461538461	0.0049144351153841	0.6400517689995652	0.652255923308127	0.6419353662210805	0.0032770422000484	0.6378663809006859	0.6460043515414751	0.0312142110964957
mee-type_smote_maxabs_5000.csv	logistic_l1_balanced_1	0.6175824175824176	0.0120378584067069	0.602635442183335	0.6325293929815002	0.647270703153056	0.0045957705037995	0.6415643003744814	0.6529771059316306	0.03698342884497
mee-type_smote_maxabs_5000.csv	rf_100_10	0.6989010989010989	0.025298603149937	0.6674887341649777	0.73031346363722	0.6815466294737176	0.0445116414503928	0.6262781267838103	0.7368151321636248	0.0271950695170583
mee-type_smote_maxabs_5000.csv	rf_100_20	0.7032967032967032	0.0205585570701865	0.6777698831276352	0.7288235234657713	0.6613710634944204	0.0484677240695403	0.601190435442398	0.7215516915464428	0.0270330187459599
mee-type_smote_maxabs_5000.csv	rf_200_10	0.7208791208791209	0.0147433053461524	0.7025728894162783	0.7391853523419635	0.6914557973758075	0.022560330841028	0.663443446782937	0.7194681479686781	0.0268797022278857
mee-type_smote_maxabs_5000.csv	rf_200_20	0.7274725274725276	0.0091940662256492	0.7160565864430377	0.7388884685020174	0.7107287175725714	0.0059379953757474	0.7033557224930054	0.7181017126521374	0.0266045031973374
mee-type_smote_maxabs_5000.csv	rf_bal_100_10	0.701098901098901	0.0143279173740717	0.6833084419262779	0.7188893602715242	0.6882145162671612	0.0224381123264684	0.6603539200037332	0.7160751125305893	0.0270670943536673
mee-type_smote_maxabs_5000.csv	rf_bal_200_20	0.7142857142857144	0.0205585570701864	0.6887588941166464	0.7398125344547825	0.6856218432397057	0.0268205068813826	0.6523197854315164	0.7189239010478949	0.0269174660633484
mee-type_smote_maxabs_5000.csv	decision_tree	0.6087912087912088	0.0377484923897091	0.5619202648044381	0.6556621527779796	0.5880659070647644	0.0687637557735862	0.502684427139426	0.6734473869901028	0.0460245636716225
mee-type_smote_maxabs_5000.csv	decision_tree_bal	0.6373626373626374	0.029074190231479	0.6012622620752823	0.6734630126499925	0.6617233618824134	0.0465191162899113	0.6039622499569761	0.7194844738078507	0.0426632191338073
mee-type_smote_maxabs_5000.csv	extra_tree	0.7252747252747253	0.0173751519789471	0.7037006245991477	0.7468488259503028	0.7308448831126305	0.044598325511691	0.6754687479445912	0.7862210182806698	0.0267334712346477
mee-type_smote_maxabs_5000.csv	extra_tree_bal	0.7340659340659341	0.0049144351153841	0.7279638569116532	0.740168011220215	0.7493675889328063	0.0213908878467159	0.7228072936039246	0.775927884261688	0.0268744925662572
mee-type_smote_maxabs_5000.csv	lda	0.4747252747252747	0.0091940662256491	0.4633093336957849	0.4861412157547645	0.5161546390117818	0.0061946982381047	0.5084629052297909	0.5238463727937728	0.0604972707845659
mee-type_smote_maxabs_5000.csv	gaussian_nb	0.3516483516483517	0.0	0.3516483516483517	0.3516483516483517	0.1519468186134852	0.0	0.1519468186134852	0.1519468186134852	0.0762766645119586
mee-type_smote_maxabs_5000.csv	svm_rbf_1	0.7186813186813187	0.0060189292033534	0.7112078309817774	0.7261548063808599	0.7387082945066138	0.0280863859305334	0.7038344402570137	0.7735821487562139	0.0295564680535818
mee-type_smote_maxabs_5000.csv	svm_rbf_2	0.6835164835164835	0.0091940662256491	0.6721005424869937	0.6949324245459734	0.6682382374111697	0.00627108493887	0.660451657012897	0.6760248178094425	0.0275405464087742
mee-type_smote_maxabs_5000.csv	svm_rbf_3	0.6857142857142857	0.0060189292033534	0.6782407980147445	0.693187773413827	0.734618100793216	0.0049373891719462	0.7284875224132893	0.7407486791731427	0.0256850677972717
mee-type_smote_maxabs_5000.csv	svm_rbf_auto	0.7032967032967034	0.0	0.7032967032967034	0.7032967032967034	0.7152080062794348	0.0	0.7152080062794348	0.7152080062794348	0.0274061129851767
mee-type_smote_maxabs_5000.csv	svm_rbf_bal	0.7186813186813187	0.0060189292033534	0.7112078309817774	0.7261548063808599	0.7387082945066138	0.0280863859305334	0.7038344402570137	0.7735821487562139	0.0295741083867509
mee-type_smote_maxabs_5000.csv	svm_sigmoid	0.6681318681318681	0.0091940662256491	0.6567159271023784	0.6795478091613578	0.739875493964164	0.0047443301290764	0.7339846300472963	0.7457663578810316	0.0234801322108616
mee-type_smote_maxabs_5000.csv	svm_sigmoid_bal	0.6681318681318681	0.0091940662256491	0.6567159271023784	0.6795478091613578	0.739875493964164	0.0047443301290764	0.7339846300472963	0.7457663578810316	0.0234772388985078
mee-type_smote_maxabs_5000.csv	svm_poly_3	0.7032967032967034	0.0	0.7032967032967034	0.7032967032967034	0.6933396435497277	0.0	0.6933396435497277	0.6933396435497277	0.0295554961421967
mee-type_smote_maxabs_5000.csv	svm_poly_4	0.7142857142857143	0.0	0.7142857142857143	0.7142857142857143	0.6976059654631083	0.0	0.6976059654631083	0.6976059654631083	0.0285994162684129
mee-type_smote_maxabs_5000.csv	mlp_50_lr0.001	0.6659340659340659	0.0316590336063471	0.6266241836871416	0.7052439481809902	0.6864613203729495	0.0226541251036449	0.6583325088209494	0.7145901319249496	0.0350151106003205
mee-type_smote_maxabs_5000.csv	mlp_100_lr0.001	0.7032967032967034	0.0205585570701865	0.6777698831276353	0.7288235234657714	0.7034058369142403	0.0285441380495868	0.66796360833831	0.7388480654901706	0.0311274151377713
mee-type_smote_maxabs_5000.csv	mlp_50x2_lr0.001	0.7098901098901098	0.0476472162388545	0.6507282768716943	0.7690519429085253	0.6916703626478062	0.0483347761215598	0.6316548112764262	0.7516859140191863	0.030096947512956
mee-type_smote_maxabs_5000.csv	mlp_128_64	0.7098901098901098	0.0098288702307683	0.697685955581548	0.7220942641986716	0.6951254896580314	0.037541904221456	0.6485110587622356	0.7417399205538273	0.0315550322168588
mee-type_smote_maxabs_5000.csv	mlp_128_64_es	0.7098901098901099	0.0408223640022125	0.6592024501869932	0.7605777695932266	0.695915684487113	0.0805555549847244	0.5958927520072568	0.7959386169669693	0.0297787735267647
mee-type_smote_maxabs_5000.csv	mlp_128_64_alpha	0.7296703296703296	0.0325986746685523	0.689193728945231	0.7701469303954283	0.704327708914175	0.0414121748165035	0.6529077023572019	0.755747715471148	0.0286903105680291
mee-type_smote_maxabs_10000.csv	logistic_l2_1	0.6373626373626373	0.0	0.6373626373626373	0.6373626373626373	0.639000087214373	0.0020476812980767	0.6364575550667559	0.64154261936199	0.0317852529702598
mee-type_smote_maxabs_10000.csv	logistic_l2_2	0.6373626373626373	0.0	0.6373626373626373	0.6373626373626373	0.6987233620238547	0.0	0.6987233620238547	0.6987233620238547	0.0294882015029818
mee-type_smote_maxabs_10000.csv	logistic_l2_3	0.6439560439560439	0.0060189292033535	0.6364825562565025	0.6514295316555853	0.648934091118965	0.0097402451066902	0.6368399794363073	0.6610282028016228	0.0337057201694201
mee-type_smote_maxabs_10000.csv	logistic_l1_1	0.6329670329670329	0.0060189292033534	0.6254935452674917	0.6404405206665742	0.6466785175608705	0.0023039135647086	0.6438178310325985	0.6495392040891425	0.0375812682448774
mee-type_smote_maxabs_10000.csv	logistic_l1_2	0.5714285714285714	0.0	0.5714285714285714	0.5714285714285714	0.6203946591043366	0.0051786520570714	0.613964513285847	0.6268248049228261	0.0401237598592506
mee-type_smote_maxabs_10000.csv	logistic_l1_3	0.6461538461538462	0.0049144351153841	0.6400517689995653	0.6522559233081271	0.6688045632454165	0.0017551553983514	0.6666252499760305	0.6709838765148025	0.0382231414887927
mee-type_smote_maxabs_10000.csv	logistic_l2_balanced_1	0.6373626373626373	0.0	0.6373626373626373	0.6373626373626373	0.639000087214373	0.0020476812980767	0.6364575550667559	0.64154261936199	0.0317849440273411
mee-type_smote_maxabs_10000.csv	logistic_l1_balanced_1	0.6329670329670329	0.0060189292033534	0.6254935452674917	0.6404405206665742	0.6470448179271708	0.0019312550573634	0.6446468480510936	0.649442787803248	0.0375911915769834
mee-type_smote_maxabs_10000.csv	rf_100_10	0.7032967032967032	0.0233112125665894	0.6743520098982938	0.7322413966951127	0.6601778811528364	0.0505553722109635	0.5974050955626918	0.7229506667429809	0.0272725762737558
mee-type_smote_maxabs_10000.csv	rf_100_20	0.6923076923076923	0.0347503039578942	0.6491594909565371	0.7354558936588474	0.6554547770274264	0.0778853695706165	0.5587473176447967	0.7521622364100561	0.0271069683257918
mee-type_smote_maxabs_10000.csv	rf_200_10	0.6923076923076923	0.013458734850457	0.6755964657825094	0.7090189188328752	0.6845024867514006	0.0357534436188553	0.6401087229980598	0.7288962505047414	0.0270170270678268
mee-type_smote_maxabs_10000.csv	rf_200_20	0.6967032967032967	0.0325986746685523	0.656226695978198	0.7371798974283953	0.6924346618795244	0.052764802714309	0.6269185059768424	0.7579508177822064	0.0270571820941669
mee-type_smote_maxabs_10000.csv	rf_bal_100_10	0.7032967032967032	0.025771515163865	0.6712971407385696	0.7352962658548369	0.6740427051722733	0.0561345479390078	0.6043424579409638	0.7437429524035828	0.0273132196449633
mee-type_smote_maxabs_10000.csv	rf_bal_200_20	0.7032967032967032	0.0173751519789471	0.6817226026211256	0.7248708039722809	0.6773463354092027	0.0226374484148769	0.6492382307012551	0.7054544401171504	0.0269719263089851
mee-type_smote_maxabs_10000.csv	decision_tree	0.5692307692307692	0.0162993373342761	0.54899246886822	0.5894690695933185	0.5577905601855182	0.0463930114083364	0.5001860281515302	0.6153950922195062	0.0506787330316742
mee-type_smote_maxabs_10000.csv	decision_tree_bal	0.5604395604395604	0.0257715151638649	0.5284399978814268	0.5924391229976941	0.5221289310785597	0.0702715478370439	0.4348752800312485	0.6093825821258709	0.0517129928894634
mee-type_smote_maxabs_10000.csv	extra_tree	0.7318681318681319	0.0352677066722664	0.688077490193968	0.7756587735422958	0.7403711793594738	0.0392601909501908	0.6916232136940166	0.7891191450249311	0.0267079767291531
mee-type_smote_maxabs_10000.csv	extra_tree_bal	0.7296703296703297	0.0166656603165968	0.7089771792489183	0.7503634800917411	0.7320308564928991	0.0232410181762198	0.7031733209418877	0.7608883920439106	0.0268387330316742
mee-type_smote_maxabs_10000.csv	lda	0.4703296703296703	0.0049144351153841	0.4642275931753895	0.4764317474839512	0.5158684172969888	0.0029395572395673	0.5122184749019588	0.5195183596920189	0.0614732595403384
mee-type_smote_maxabs_10000.csv	gaussian_nb	0.3516483516483517	0.0	0.3516483516483517	0.3516483516483517	0.1519468186134852	0.0	0.1519468186134852	0.1519468186134852	0.0762766645119586
mee-type_smote_maxabs_10000.csv	svm_rbf_1	0.7032967032967034	0.0	0.7032967032967034	0.7032967032967034	0.6959953212054052	0.0	0.6959953212054052	0.6959953212054052	0.0303859923159318
mee-type_smote_maxabs_10000.csv	svm_rbf_2	0.6923076923076923	0.0	0.6923076923076923	0.6923076923076923	0.6750640337106503	0.0	0.6750640337106503	0.6750640337106503	0.0270826266412497
mee-type_smote_maxabs_10000.csv	svm_rbf_3	0.701098901098901	0.0049144351153841	0.6949968239446201	0.707200978253182	0.7595314056143547	0.0003699037183621	0.7590721094844627	0.7599907017442468	0.0266830718479483
mee-type_smote_maxabs_10000.csv	svm_rbf_auto	0.7076923076923077	0.0060189292033534	0.7002188199927665	0.715165795391849	0.7100233100233101	0.0045858508216027	0.7043292241569928	0.7157173958896274	0.0283240885679508
mee-type_smote_maxabs_10000.csv	svm_rbf_bal	0.7032967032967034	0.0	0.7032967032967034	0.7032967032967034	0.6959953212054052	0.0	0.6959953212054052	0.6959953212054052	0.0303950703769947
mee-type_smote_maxabs_10000.csv	svm_sigmoid	0.6593406593406593	0.0	0.6593406593406593	0.6593406593406593	0.7189587506089969	0.0	0.7189587506089969	0.7189587506089969	0.0256741293984513
mee-type_smote_maxabs_10000.csv	svm_sigmoid_bal	0.6593406593406593	0.0	0.6593406593406593	0.6593406593406593	0.7189587506089969	0.0	0.7189587506089969	0.7189587506089969	0.0256841150665818
mee-type_smote_maxabs_10000.csv	svm_poly_3	0.6923076923076923	0.0	0.6923076923076923	0.6923076923076923	0.6800235478806907	0.0	0.6800235478806907	0.6800235478806907	0.0289792722500453
mee-type_smote_maxabs_10000.csv	svm_poly_4	0.7120879120879121	0.0049144351153841	0.7059858349336312	0.718189989242193	0.693332461189604	0.0006825604326922	0.6924849504737317	0.6941799719054763	0.0281765103344748
mee-type_smote_maxabs_10000.csv	mlp_50_lr0.001	0.6747252747252747	0.0296906727167171	0.6378594353304762	0.7115911141200731	0.6776839226120613	0.0289199927139461	0.6417750088308392	0.7135928363932835	0.034120695432434
mee-type_smote_maxabs_10000.csv	mlp_100_lr0.001	0.6879120879120879	0.0385399514653849	0.6400584176849988	0.735765758139177	0.7043853451367996	0.0290017713690422	0.6683748897437232	0.7403958005298761	0.0329684016415475
mee-type_smote_maxabs_10000.csv	mlp_50x2_lr0.001	0.6901098901098901	0.039161603694957	0.6414843366899383	0.7387354435298419	0.7129303264619781	0.0324094428963852	0.6726886880156957	0.7531719649082604	0.0325278162692188
mee-type_smote_maxabs_10000.csv	mlp_128_64	0.7362637362637363	0.0205585570701864	0.7107369160946683	0.7617905564328044	0.7229147252079583	0.0225460692347053	0.6949200827382152	0.7509093676777014	0.0284178904084769
mee-type_smote_maxabs_10000.csv	mlp_128_64_es	0.7054945054945054	0.050597206299874	0.642669776022263	0.7683192349667478	0.7002923010065867	0.0417243084623961	0.6484847293388807	0.7520998726742927	0.0313670851326333
mee-type_smote_maxabs_10000.csv	mlp_128_64_alpha	0.7274725274725274	0.0399250596144724	0.6778990183230978	0.777046036621957	0.7194507166890047	0.0271420663753297	0.6857493900339009	0.7531520433441086	0.0297867149209533
mee-type_vae_maxabs_5.csv	logistic_l2_1	0.4348837209302325	0.0685947962965238	0.3497120319047178	0.5200554099557472	0.6125574664733351	0.0614819890053879	0.5362174941873851	0.6888974387592851	0.0531859842072719
mee-type_vae_maxabs_5.csv	logistic_l2_2	0.2627906976744186	0.0399431721798085	0.2131946988046961	0.3123866965441411	0.6195804389409041	0.0556943124555508	0.550426816260135	0.6887340616216732	0.06041829322787
mee-type_vae_maxabs_5.csv	logistic_l2_3	0.4744186046511627	0.058947869095984	0.4012251578238509	0.5476120514784746	0.5915189128270523	0.0399684606086461	0.541891514225671	0.6411463114284336	0.0463040531677148
mee-type_vae_maxabs_5.csv	logistic_l1_1	0.2162790697674418	0.0104003161744176	0.2033653716037311	0.2291927679311525	0.1880371651103584	0.1727382154599844	-0.0264456581402695	0.4025199883609863	0.0572469969143834
mee-type_vae_maxabs_5.csv	logistic_l1_2	0.0255813953488372	0.026515707560445	-0.0073422041158668	0.0585049948135412	0.0012168739859383	0.0014995317071943	-0.0006450405490499	0.0030787885209266	0.0622864723990771
mee-type_vae_maxabs_5.csv	logistic_l1_3	0.4558139534883721	0.0460735180375789	0.3986061248705185	0.5130217821062257	0.588918838199744	0.0419092965118878	0.5368815735308862	0.6409561028686018	0.04820557478257
mee-type_vae_maxabs_5.csv	logistic_l2_balanced_1	0.4348837209302325	0.0685947962965238	0.3497120319047178	0.5200554099557472	0.6125574664733351	0.0614819890053879	0.5362174941873851	0.6888974387592851	0.0531870857275836
mee-type_vae_maxabs_5.csv	logistic_l1_balanced_1	0.2186046511627906	0.0097286049596985	0.2065249926315863	0.2306843096939949	0.1899751496064824	0.171673398783362	-0.0231855291120964	0.4031358283250613	0.0572476780279831
mee-type_vae_maxabs_5.csv	rf_100_10	0.3837209302325581	0.064217215216205	0.3039847260336933	0.463457134431423	0.6350004936923541	0.0675650386594979	0.5511074176516098	0.7188935697330985	0.0522433925987449
mee-type_vae_maxabs_5.csv	rf_100_20	0.3627906976744187	0.0529037821678015	0.2971019759878451	0.4284794193609922	0.64249868527395	0.0433107263458641	0.5887213156342351	0.696276054913665	0.0515222945736434
mee-type_vae_maxabs_5.csv	rf_200_10	0.3860465116279069	0.1038079726542588	0.2571518892565927	0.5149411339992211	0.5908889030186459	0.1012497243062537	0.4651707655195137	0.7166070405177781	0.0519492402305732
mee-type_vae_maxabs_5.csv	rf_200_20	0.3720930232558139	0.1090794362749634	0.2366530142888298	0.507533032222798	0.5971717171717172	0.0631090792074717	0.5188114455600097	0.6755319887834248	0.0519807751937984
mee-type_vae_maxabs_5.csv	rf_bal_100_10	0.3953488372093023	0.0652614660483826	0.3143160243470281	0.4763816500715765	0.6136367466372523	0.0574408049936841	0.5423145670487516	0.684958926225753	0.0524293342944181
mee-type_vae_maxabs_5.csv	rf_bal_200_20	0.3976744186046511	0.0836078047081281	0.293861617529717	0.5014872196795852	0.631765269614107	0.1026826124822462	0.5042679664533931	0.7592625727748208	0.0512980232558139
mee-type_vae_maxabs_5.csv	decision_tree	0.2813953488372093	0.1184106941218694	0.1343690529437656	0.4284216447306529	0.4247256840127097	0.1434575981295711	0.2465995491464373	0.6028518188789822	0.0958139534883721
mee-type_vae_maxabs_5.csv	decision_tree_bal	0.2813953488372093	0.182079805870357	0.0553134090880561	0.5074772885863624	0.4730658479368818	0.0850030502536139	0.3675206206994638	0.5786110751742999	0.0958139534883721
mee-type_vae_maxabs_5.csv	extra_tree	0.4046511627906977	0.1166853367842055	0.259767180987468	0.5495351445939274	0.6426295854168631	0.0590062036481339	0.5693637066762953	0.7158954641574309	0.0499341395348837
mee-type_vae_maxabs_5.csv	extra_tree_bal	0.4372093023255813	0.0820571105319876	0.3353219423813851	0.5390966622697776	0.6641010983174784	0.0521221151251315	0.5993829444563706	0.7288192521785862	0.0497967441860465
mee-type_vae_maxabs_5.csv	lda	0.1488372093023255	0.1565238946089659	-0.045512875492268	0.3431872940969192	0.1471128846928265	0.1686630608043952	-0.0623099657348437	0.3565357351204969	0.1130380919069558
mee-type_vae_maxabs_5.csv	gaussian_nb	0.2744186046511628	0.1278012247817124	0.1157324249133634	0.4331047843889621	0.1382407899106933	0.0555079847748502	0.069318523602919	0.2071630562184677	0.096743894934229
mee-type_vae_maxabs_5.csv	svm_rbf_1	0.3674418604651163	0.046945649391131	0.3091511377438523	0.4257325831863803	0.5873397210025117	0.0279227240037192	0.5526690798753134	0.6220103621297101	0.0638620802709728
mee-type_vae_maxabs_5.csv	svm_rbf_2	0.4023255813953488	0.0769553121291827	0.3067729408540089	0.4978782219366887	0.5807665778216841	0.0414617314445081	0.5292850385838452	0.6322481170595229	0.055695524639488
mee-type_vae_maxabs_5.csv	svm_rbf_3	0.3674418604651163	0.046945649391131	0.3091511377438523	0.4257325831863803	0.5873397210025117	0.0279227240037192	0.5526690798753134	0.6220103621297101	0.0625377264324445
mee-type_vae_maxabs_5.csv	svm_rbf_auto	0.3651162790697674	0.0407806463180236	0.3144804187131964	0.4157521394263384	0.5962999048754863	0.0261287798650095	0.5638567396001126	0.6287430701508601	0.0633718818095325
mee-type_vae_maxabs_5.csv	svm_rbf_bal	0.3674418604651163	0.046945649391131	0.3091511377438523	0.4257325831863803	0.5873397210025117	0.0279227240037192	0.5526690798753134	0.6220103621297101	0.0640469172288003
mee-type_vae_maxabs_5.csv	svm_sigmoid	0.3744186046511628	0.0389144198387942	0.3260999705263456	0.4227372387759799	0.6157896356609368	0.0220849407076542	0.5883675598817778	0.6432117114400958	0.0628115306371103
mee-type_vae_maxabs_5.csv	svm_sigmoid_bal	0.3744186046511628	0.0389144198387942	0.3260999705263456	0.4227372387759799	0.6157896356609368	0.0220849407076542	0.5883675598817778	0.6432117114400958	0.0627774628815649
mee-type_vae_maxabs_5.csv	svm_poly_3	0.3441860465116279	0.0334996750950882	0.3025907059945335	0.3857813870287222	0.5927546097313539	0.046044538774054	0.5355827636217135	0.6499264558409942	0.0645582208897438
mee-type_vae_maxabs_5.csv	svm_poly_4	0.3325581395348836	0.0447334513062124	0.2770142235325584	0.3881020555372089	0.5696075261268041	0.03322057937199	0.5283587287211333	0.6108563235324749	0.0625356255991262
mee-type_vae_maxabs_5.csv	mlp_50_lr0.001	0.4488372093023255	0.0690858175698276	0.3630558368393973	0.5346185817652538	0.6130806144759633	0.0325744726882001	0.5726340644785534	0.6535271644733732	0.0490003999920288
mee-type_vae_maxabs_5.csv	mlp_100_lr0.001	0.4627906976744186	0.0223667256531062	0.435018739673256	0.4905626556755812	0.6282564685953432	0.021537274592042	0.601514410114976	0.6549985270757105	0.0491091357547938
mee-type_vae_maxabs_5.csv	mlp_50x2_lr0.001	0.3604651162790698	0.1059352741760964	0.2289291001947656	0.4920011323633739	0.5867213729423032	0.0331409784454464	0.5455714131413454	0.627871332743261	0.0606545954790603
mee-type_vae_maxabs_5.csv	mlp_128_64	0.4232558139534883	0.0645322647698214	0.3431284240662478	0.5033832038407289	0.5949095311133614	0.0487838994622425	0.5343363194591028	0.6554827427676201	0.0598184231740493
mee-type_vae_maxabs_5.csv	mlp_128_64_es	0.0651162790697674	0.0634760189021217	-0.0136996083502989	0.1439321664898338	0.0944453534644497	0.1776547045734707	-0.1261420973159548	0.3150328042448543	0.0624960463260088
mee-type_vae_maxabs_5.csv	mlp_128_64_alpha	0.4069767441860465	0.047232781422302	0.3483294999589463	0.4656239884131466	0.600395576455768	0.0147319074546211	0.5821034973444953	0.6186876555670408	0.0617934262036575
mee-type_gan_maxabs_10000.csv	svm_sigmoid	0.145054945054945	0.0143279173740717	0.1272644858823219	0.1628454042275681	0.2917829566839998	0.0310643693851146	0.2532114475915997	0.3303544657763999	0.0554262753297143
mee-type_gan_maxabs_10000.csv	svm_sigmoid_bal	0.145054945054945	0.0143279173740717	0.1272644858823219	0.1628454042275681	0.2917829566839998	0.0310643693851146	0.2532114475915997	0.3303544657763999	0.0554248165973287
mee-type_gan_maxabs_10000.csv	svm_poly_3	0.3846153846153846	0.0	0.3846153846153846	0.3846153846153846	0.1479289940828402	0.0	0.1479289940828402	0.1479289940828402	0.0715362482093818
mee-type_gan_maxabs_10000.csv	svm_poly_4	0.3846153846153846	0.0	0.3846153846153846	0.3846153846153846	0.1479289940828402	0.0	0.1479289940828402	0.1479289940828402	0.0720772896164065
mee-type_gan_maxabs_10000.csv	mlp_50_lr0.001	0.4483516483516484	0.0863179643369471	0.3411737396362244	0.5555295570670724	0.5478014565725522	0.1093270475560596	0.4120539975922819	0.6835489155528225	0.04734323204903
mee-type_gan_maxabs_10000.csv	mlp_100_lr0.001	0.5956043956043957	0.0304932679681573	0.5577420025807546	0.6334667886280368	0.6386890812626924	0.0665775074504336	0.5560221871713459	0.721355975354039	0.0343604306664509
mee-type_gan_maxabs_10000.csv	mlp_50x2_lr0.001	0.4373626373626373	0.0637930781261538	0.3581530689187919	0.5165722058064827	0.4958151340052313	0.0482953921347846	0.4358484843123359	0.5557817836981268	0.048784895048439
mee-type_gan_maxabs_10000.csv	mlp_128_64	0.5956043956043955	0.0593813454334342	0.5218727168147985	0.6693360743939925	0.5847909815015342	0.0362628434905825	0.5397647142667801	0.6298172487362883	0.0355019983384296
mee-type_gan_maxabs_10000.csv	mlp_128_64_es	0.5340659340659341	0.0335119795208283	0.4924553155863795	0.5756765525454886	0.5390800804872704	0.0314398028714578	0.5000424091511577	0.5781177518233831	0.0375116488075144
mee-type_gan_maxabs_10000.csv	mlp_128_64_alpha	0.6087912087912087	0.0325986746685523	0.5683146080661102	0.6492678095163072	0.6360866455509313	0.079715827245139	0.5371063727736112	0.7350669183282514	0.0319916750047149
