# Supplementary material for: Synthetic Data Generation for Classifying Electrophysiological and Morpho- Electrophysiological Neurons from Mouse Visual Cortex
Source: Research Square preprint supplement (doi:10.21203/rs.3.rs-7545694/v1), 2025-09-17
Supplement: Supplementary file 5 [file a84fe3b347d8557b62bf3cc7.xlsx]

## Sheet: Feuil1
mean_fit_time	mean_score_time	mean_test_score	std_test_score	mean_train_score	std_train_score	params	rank_test_score	scaler	reducer	classifier	consistency
0.0504991	0.0103008	0.519871	0.0234002	0.526075	0.00312048	{'classifier__C': 0.1, 'classifier__gamma': 'scale'}	5	standard	pca	svm_linear	0.00620423
0.0494001	0.00989883	0.519871	0.0234002	0.526075	0.00312048	{'classifier__C': 0.1, 'classifier__gamma': 'auto'}	5	standard	pca	svm_linear	0.00620423
0.0712995	0.0103012	0.521885	0.0252239	0.53034	0.00417669	{'classifier__C': 1, 'classifier__gamma': 'scale'}	3	standard	pca	svm_linear	0.00845532
0.0658981	0.0109004	0.521885	0.0252239	0.53034	0.00417669	{'classifier__C': 1, 'classifier__gamma': 'auto'}	3	standard	pca	svm_linear	0.00845532
0.1601	0.00789995	0.525249	0.0253016	0.530565	0.00385566	{'classifier__C': 10, 'classifier__gamma': 'scale'}	1	standard	pca	svm_linear	0.00531515
0.147299	0.00629985	0.525249	0.0253016	0.530565	0.00385566	{'classifier__C': 10, 'classifier__gamma': 'auto'}	1	standard	pca	svm_linear	0.00531515
0.0653983	0.0259998	0.496993	0.0260881	0.504153	0.00276162	{'classifier__C': 0.1, 'classifier__gamma': 'scale'}	5	standard	pca	svm_rbf	0.00715924
0.127099	0.0288011	0.466008	0.0249975	0.482454	0.00502016	{'classifier__C': 0.1, 'classifier__gamma': 'auto'}	6	standard	pca	svm_rbf	0.0164465
0.123502	0.0254009	0.525907	0.0273172	0.55174	0.00528121	{'classifier__C': 10, 'classifier__gamma': 'scale'}	2	standard	pca	svm_rbf	0.0258327
0.0765101	0.0119125	0.470706	0.0251947	0.471081	0.00382287	{'classifier__C': 0.1, 'classifier__gamma': 'scale'}	1	standard	pca	svm_sigmoid	0.000375643
0.112626	0.0144004	0.427635	0.0211705	0.426337	0.00653321	{'classifier__C': 0.1, 'classifier__gamma': 'auto'}	2	standard	pca	svm_sigmoid	-0.00129796
0.070751	0.0126004	0.412752	0.0322949	0.413767	0.00721428	{'classifier__C': 1, 'classifier__gamma': 'scale'}	3	standard	pca	svm_sigmoid	0.00101507
0.0969991	0.0143997	0.377812	0.0256831	0.369095	0.0184095	{'classifier__C': 1, 'classifier__gamma': 'auto'}	5	standard	pca	svm_sigmoid	-0.0087167
0.0646985	0.0110016	0.399324	0.0248028	0.397606	0.00824949	{'classifier__C': 10, 'classifier__gamma': 'scale'}	4	standard	pca	svm_sigmoid	-0.00171808
0.0747982	0.0103	0.360947	0.0160064	0.36079	0.0170741	{'classifier__C': 10, 'classifier__gamma': 'auto'}	6	standard	pca	svm_sigmoid	-0.000156429
0.0237005	0.00449941	0.460629	0.0268297	0.459933	0.00239133	{'classifier__C': 0.1, 'classifier__penalty': 'l1', 'classifier__solver': 'liblinear'}	6	standard	pca	logistic_regression	-0.000696725
0.0230991	0.00499995	0.463994	0.025428	0.464123	0.00241179	{'classifier__C': 0.1, 'classifier__penalty': 'l2', 'classifier__solver': 'liblinear'}	5	standard	pca	logistic_regression	0.000128773
0.0343997	0.00469992	0.470048	0.023904	0.470632	0.00212686	{'classifier__C': 1, 'classifier__penalty': 'l1', 'classifier__solver': 'liblinear'}	2	standard	pca	logistic_regression	0.000584022
0.023298	0.00410068	0.468035	0.0274414	0.468537	0.00276898	{'classifier__C': 1, 'classifier__penalty': 'l2', 'classifier__solver': 'liblinear'}	4	standard	pca	logistic_regression	0.000501973
0.0296005	0.00420058	0.470048	0.0225464	0.47138	0.00173285	{'classifier__C': 10, 'classifier__penalty': 'l1', 'classifier__solver': 'liblinear'}	2	standard	pca	logistic_regression	0.00133241
21519783	0.0268029	0.626274	0.0144817	0.652226	0.00640492	{'classifier__C': 10, 'classifier__gamma': 'scale'}	1	quantile-uniform	nca	svm_rbf	0.0259522
0.0130989	0.00300074	0.517132	0.0327687	0.519416	0.00376161	{}	1	standard	pca	lda	0.00228361
2400556948	0.075702	0.63231	0.0243231	0.650804	0.00741918	{'classifier__C': 1, 'classifier__gamma': 'scale'}	1	quantile-normal	nca	svm_rbf	0.0184936
0.163286	0.013336	0.42622	0.03377	0.456049	0.040606	{'classifier__max_depth': None, 'classifier__min_samples_leaf': 5, 'classifier__min_samples_split': 10, 'classifier__n_estimators': 100}	59	standard	pca	extra_trees	0.0298289
0.1615	0.0135	0.390577	0.00539645	0.394762	0.0089599	{'classifier__max_depth': None, 'classifier__min_samples_leaf': 10, 'classifier__min_samples_split': 2, 'classifier__n_estimators': 100}	85	standard	pca	extra_trees	0.00418551
0.312	0.0212002	0.390568	0.0070219	0.390947	0.0031898	{'classifier__max_depth': None, 'classifier__min_samples_leaf': 10, 'classifier__min_samples_split': 2, 'classifier__n_estimators': 200}	89	standard	pca	extra_trees	0.000379732
0.465635	0.0293166	0.391239	0.00834417	0.394688	0.00483391	{'classifier__max_depth': None, 'classifier__min_samples_leaf': 10, 'classifier__min_samples_split': 2, 'classifier__n_estimators': 300}	81	standard	pca	extra_trees	0.00344937
0.749883	0.0452471	0.390572	0.00842911	0.393939	0.00469613	{'classifier__max_depth': None, 'classifier__min_samples_leaf': 10, 'classifier__min_samples_split': 2, 'classifier__n_estimators': 500}	87	standard	pca	extra_trees	0.00336652
0.165267	0.0128998	0.391243	0.00855701	0.393715	0.00318768	{'classifier__max_depth': None, 'classifier__min_samples_leaf': 10, 'classifier__min_samples_split': 10, 'classifier__n_estimators': 100}	78	standard	pca	extra_trees	0.00247195
0.3181	0.0212001	0.389901	0.00822995	0.391171	0.00335215	{'classifier__max_depth': None, 'classifier__min_samples_leaf': 10, 'classifier__min_samples_split': 10, 'classifier__n_estimators': 200}	92	standard	pca	extra_trees	0.00126994
0.453193	0.0286007	0.389897	0.00742388	0.390797	0.00404088	{'classifier__max_depth': None, 'classifier__min_samples_leaf': 10, 'classifier__min_samples_split': 10, 'classifier__n_estimators': 300}	97	standard	pca	extra_trees	0.000900668
0.751236	0.0429998	0.391239	0.00834417	0.394314	0.00421762	{'classifier__max_depth': None, 'classifier__min_samples_leaf': 10, 'classifier__min_samples_split': 10, 'classifier__n_estimators': 500}	81	standard	pca	extra_trees	0.00307462
0.163	0.0128	0.389901	0.00926669	0.392592	0.00625668	{'classifier__max_depth': None, 'classifier__min_samples_leaf': 10, 'classifier__min_samples_split': 20, 'classifier__n_estimators': 100}	92	standard	pca	extra_trees	0.00269041
0.317	0.0209001	0.39259	0.00935195	0.395362	0.0102788	{'classifier__max_depth': None, 'classifier__min_samples_leaf': 10, 'classifier__min_samples_split': 20, 'classifier__n_estimators': 200}	75	standard	pca	extra_trees	0.00277134
0.455828	0.0284998	0.389225	0.00830834	0.392592	0.00306551	{'classifier__max_depth': None, 'classifier__min_samples_leaf': 10, 'classifier__min_samples_split': 20, 'classifier__n_estimators': 300}	103	standard	pca	extra_trees	0.00336671
0.748759	0.0430997	0.391243	0.00743002	0.393716	0.00441066	{'classifier__max_depth': None, 'classifier__min_samples_leaf': 10, 'classifier__min_samples_split': 20, 'classifier__n_estimators': 500}	78	standard	pca	extra_trees	0.00247223
0.312345	0.0220003	0.427589	0.0267822	0.453423	0.0271343	{'classifier__max_depth': 10, 'classifier__min_samples_leaf': 5, 'classifier__min_samples_split': 10, 'classifier__n_estimators': 200}	55	standard	pca	extra_trees	0.0258335
0.165482	0.0134333	0.427598	0.0277438	0.449158	0.0365286	{'classifier__max_depth': 10, 'classifier__min_samples_leaf': 5, 'classifier__min_samples_split': 20, 'classifier__n_estimators': 100}	54	standard	pca	extra_trees	0.0215596
0.315901	0.0206997	0.437684	0.0301423	0.466446	0.0333485	{'classifier__max_depth': 10, 'classifier__min_samples_leaf': 5, 'classifier__min_samples_split': 20, 'classifier__n_estimators': 200}	37	standard	pca	extra_trees	0.0287621
0.461676	0.0306001	0.428265	0.0244822	0.447588	0.0235284	{'classifier__max_depth': 10, 'classifier__min_samples_leaf': 5, 'classifier__min_samples_split': 20, 'classifier__n_estimators': 300}	50	standard	pca	extra_trees	0.019323
0.781613	0.0468999	0.42354	0.0236066	0.452152	0.0244348	{'classifier__max_depth': 10, 'classifier__min_samples_leaf': 5, 'classifier__min_samples_split': 20, 'classifier__n_estimators': 500}	65	standard	pca	extra_trees	0.0286124
0.1632	0.0130001	0.394595	0.0114207	0.396336	0.0150072	{'classifier__max_depth': 10, 'classifier__min_samples_leaf': 10, 'classifier__min_samples_split': 2, 'classifier__n_estimators': 100}	73	standard	pca	extra_trees	0.0017416
0.327936	0.022534	0.391919	0.0088366	0.393191	0.00430012	{'classifier__max_depth': 10, 'classifier__min_samples_leaf': 10, 'classifier__min_samples_split': 2, 'classifier__n_estimators': 200}	77	standard	pca	extra_trees	0.00127221
0.471393	0.0298004	0.391239	0.00778566	0.391845	0.00260933	{'classifier__max_depth': 10, 'classifier__min_samples_leaf': 10, 'classifier__min_samples_split': 2, 'classifier__n_estimators': 300}	81	standard	pca	extra_trees	0.000605898
0.757462	0.047	0.389221	0.00751841	0.39379	0.00330238	{'classifier__max_depth': 10, 'classifier__min_samples_leaf': 10, 'classifier__min_samples_split': 2, 'classifier__n_estimators': 500}	104	standard	pca	extra_trees	0.00456918
0.160154	0.0139002	0.387212	0.00776687	0.391245	0.00519978	{'classifier__max_depth': 10, 'classifier__min_samples_leaf': 10, 'classifier__min_samples_split': 10, 'classifier__n_estimators': 100}	108	standard	pca	extra_trees	0.00403333
0.305509	0.0202185	0.389892	0.00936274	0.391397	0.00576055	{'classifier__max_depth': 10, 'classifier__min_samples_leaf': 10, 'classifier__min_samples_split': 10, 'classifier__n_estimators': 200}	98	standard	pca	extra_trees	0.00150451
0.468087	0.0284146	0.389892	0.00778685	0.393491	0.00414234	{'classifier__max_depth': 10, 'classifier__min_samples_leaf': 10, 'classifier__min_samples_split': 10, 'classifier__n_estimators': 300}	98	standard	pca	extra_trees	0.00359881
0.74626	0.0431999	0.390568	0.0070219	0.393566	0.00292449	{'classifier__max_depth': 10, 'classifier__min_samples_leaf': 10, 'classifier__min_samples_split': 10, 'classifier__n_estimators': 500}	89	standard	pca	extra_trees	0.00299776
0.165195	0.0129003	0.389221	0.00808782	0.389899	0.00550745	{'classifier__max_depth': 10, 'classifier__min_samples_leaf': 10, 'classifier__min_samples_split': 20, 'classifier__n_estimators': 100}	105	standard	pca	extra_trees	0.00067842
0.3037	0.0205005	0.389216	0.00662587	0.391845	0.00341141	{'classifier__max_depth': 10, 'classifier__min_samples_leaf': 10, 'classifier__min_samples_split': 20, 'classifier__n_estimators': 200}	106	standard	pca	extra_trees	0.00262884
0.454875	0.0279366	0.390577	0.00750131	0.392293	0.00176551	{'classifier__max_depth': 10, 'classifier__min_samples_leaf': 10, 'classifier__min_samples_split': 20, 'classifier__n_estimators': 300}	85	standard	pca	extra_trees	0.00171662
0.745489	0.0427001	0.390572	0.00588634	0.392742	0.00274017	{'classifier__max_depth': 10, 'classifier__min_samples_leaf': 10, 'classifier__min_samples_split': 20, 'classifier__n_estimators': 500}	87	standard	pca	extra_trees	0.00216992
0.159	0.0133998	0.389225	0.00648096	0.391545	0.00596696	{'classifier__max_depth': 20, 'classifier__min_samples_leaf': 10, 'classifier__min_samples_split': 2, 'classifier__n_estimators': 100}	102	standard	pca	extra_trees	0.00231992
0.3059	0.0213007	0.389901	0.00703353	0.390423	0.00340878	{'classifier__max_depth': 20, 'classifier__min_samples_leaf': 10, 'classifier__min_samples_split': 2, 'classifier__n_estimators': 200}	91	standard	pca	extra_trees	0.00052177
0.4579	0.0309999	0.389901	0.00822995	0.392592	0.00277384	{'classifier__max_depth': 20, 'classifier__min_samples_leaf': 10, 'classifier__min_samples_split': 2, 'classifier__n_estimators': 300}	92	standard	pca	extra_trees	0.00269114
0.760168	0.0459006	0.391239	0.00718386	0.394164	0.00233807	{'classifier__max_depth': 20, 'classifier__min_samples_leaf': 10, 'classifier__min_samples_split': 2, 'classifier__n_estimators': 500}	81	standard	pca	extra_trees	0.00292486
0.1631	0.0140002	0.392595	0.00740861	0.397829	0.00812674	{'classifier__max_depth': 20, 'classifier__min_samples_leaf': 10, 'classifier__min_samples_split': 10, 'classifier__n_estimators': 100}	74	standard	pca	extra_trees	0.00523451
0.309968	0.0214	0.389901	0.00823737	0.391021	0.00367175	{'classifier__max_depth': 20, 'classifier__min_samples_leaf': 10, 'classifier__min_samples_split': 10, 'classifier__n_estimators': 200}	92	standard	pca	extra_trees	0.00111996
0.45134	0.0293173	0.389901	0.00876715	0.393341	0.001675	{'classifier__max_depth': 20, 'classifier__min_samples_leaf': 10, 'classifier__min_samples_split': 10, 'classifier__n_estimators': 300}	92	standard	pca	extra_trees	0.0034397
0.746079	0.0432998	0.388545	0.00692063	0.392069	0.00156215	{'classifier__max_depth': 20, 'classifier__min_samples_leaf': 10, 'classifier__min_samples_split': 10, 'classifier__n_estimators': 500}	107	standard	pca	extra_trees	0.00352358
0.16149	0.0132178	0.389888	0.00812614	0.393043	0.00761106	{'classifier__max_depth': 20, 'classifier__min_samples_leaf': 10, 'classifier__min_samples_split': 20, 'classifier__n_estimators': 100}	101	standard	pca	extra_trees	0.00315502
0.3087	0.0204003	0.391243	0.0079981	0.395137	0.00475306	{'classifier__max_depth': 20, 'classifier__min_samples_leaf': 10, 'classifier__min_samples_split': 20, 'classifier__n_estimators': 200}	78	standard	pca	extra_trees	0.00389332
0.4412	0.0240997	0.389892	0.00718516	0.392219	0.00303971	{'classifier__max_depth': 20, 'classifier__min_samples_leaf': 10, 'classifier__min_samples_split': 20, 'classifier__n_estimators': 300}	98	standard	pca	extra_trees	0.00232669
0.589398	0.0250999	0.391924	0.00603236	0.391844	0.00133339	{'classifier__max_depth': 20, 'classifier__min_samples_leaf': 10, 'classifier__min_samples_split': 20, 'classifier__n_estimators': 500}	76	standard	pca	extra_trees	-7.9406e-05
3508174729	0.00509977	0.523894	0.021949	0.547924	0.00488448	{'classifier__alpha': 0.0001, 'classifier__hidden_layer_sizes': (50,)}	4	standard	pca	mlp	0.0240302
3812011313	0.00540023	0.528605	0.0243414	0.550617	0.00602267	{'classifier__alpha': 0.0001, 'classifier__hidden_layer_sizes': (100,)}	2	standard	pca	mlp	0.0220121
3868396902	0.00549934	0.524574	0.0267358	0.550093	0.00560132	{'classifier__alpha': 0.001, 'classifier__hidden_layer_sizes': (50,)}	3	standard	pca	mlp	0.0255193
3790581679	0.00540004	0.523222	0.0269095	0.552339	0.00531014	{'classifier__alpha': 0.01, 'classifier__hidden_layer_sizes': (50,)}	5	standard	pca	mlp	0.0291162
3462121153	0.00529983	0.625558	0.0241688	0.650056	0.00762086	{'classifier__alpha': 0.0001, 'classifier__hidden_layer_sizes': (100,)}	1	maxabs	lda	mlp	0.0244978
0.0309992	0.00820067	0.614167	0.0234732	0.623119	0.0091819	{'classifier__C': 0.1, 'classifier__gamma': 'scale'}	5	standard	lda	svm_linear	0.00895282
0.0410973	0.00860035	0.614167	0.0234732	0.623119	0.0091819	{'classifier__C': 0.1, 'classifier__gamma': 'auto'}	5	standard	lda	svm_linear	0.00895282
0.042299	0.00930154	0.616157	0.0240843	0.633819	0.0066749	{'classifier__C': 1, 'classifier__gamma': 'scale'}	3	standard	lda	svm_linear	0.0176615
0.0449636	0.00904117	0.616157	0.0240843	0.633819	0.0066749	{'classifier__C': 1, 'classifier__gamma': 'auto'}	3	standard	lda	svm_linear	0.0176615
0.0716824	0.00829895	0.620184	0.0259488	0.634193	0.00714232	{'classifier__C': 10, 'classifier__gamma': 'scale'}	1	standard	lda	svm_linear	0.0140089
0.0669986	0.0076	0.620184	0.0259488	0.634193	0.00714232	{'classifier__C': 10, 'classifier__gamma': 'auto'}	1	standard	lda	svm_linear	0.0140089
0.0597966	0.0234999	0.59128	0.0238044	0.596409	0.00263812	{'classifier__C': 0.1, 'classifier__gamma': 'scale'}	6	standard	lda	svm_rbf	0.0051295
0.0988993	0.0239003	0.59396	0.0223334	0.605911	0.00363058	{'classifier__C': 0.1, 'classifier__gamma': 'auto'}	5	standard	lda	svm_rbf	0.0119515
0.0646002	0.0229994	0.612811	0.0319542	0.630827	0.00805891	{'classifier__C': 1, 'classifier__gamma': 'scale'}	2	standard	lda	svm_rbf	0.018016
0.084199	0.0234999	0.615473	0.0275308	0.641301	0.0072179	{'classifier__C': 10, 'classifier__gamma': 'scale'}	1	standard	lda	svm_rbf	0.0258281
3342983389	0.00540063	0.627576	0.0247279	0.647886	0.00857635	{'classifier__alpha': 0.001, 'classifier__hidden_layer_sizes': (50,)}	1	robust	lda	mlp	0.0203102
0.0979985	0.0141994	0.502381	0.0312785	0.505125	0.0112261	{'classifier__C': 0.1, 'classifier__gamma': 'auto'}	4	standard	lda	svm_sigmoid	0.00274447
0.0595006	0.0111004	0.525277	0.0148819	0.534306	0.00660007	{'classifier__C': 1, 'classifier__gamma': 'scale'}	2	standard	lda	svm_sigmoid	0.00902984
0.084398	0.014201	0.438323	0.0309218	0.445866	0.010255	{'classifier__C': 1, 'classifier__gamma': 'auto'}	5	standard	lda	svm_sigmoid	0.00754305
0.0552983	0.0107011	0.503714	0.0301672	0.504228	0.00936521	{'classifier__C': 10, 'classifier__gamma': 'scale'}	3	standard	lda	svm_sigmoid	0.000513553
0.064799	0.00910003	0.412112	0.038992	0.428358	0.0100958	{'classifier__C': 10, 'classifier__gamma': 'auto'}	6	standard	lda	svm_sigmoid	0.016246
0.0303017	0.00400024	0.535412	0.0325115	0.540592	0.0155467	{'classifier__C': 0.1, 'classifier__penalty': 'l1', 'classifier__solver': 'liblinear'}	5	standard	lda	logistic_regression	0.00518023
0.0275002	0.00349987	0.52461	0.0216153	0.53498	0.0120545	{'classifier__C': 0.1, 'classifier__penalty': 'l2', 'classifier__solver': 'liblinear'}	6	standard	lda	logistic_regression	0.0103702
0.0484001	0.00470083	0.550916	0.0381288	0.560795	0.0157547	{'classifier__C': 1, 'classifier__penalty': 'l1', 'classifier__solver': 'liblinear'}	3	standard	lda	logistic_regression	0.0098786
0.0322002	0.00509977	0.547551	0.0406994	0.556455	0.0158862	{'classifier__C': 1, 'classifier__penalty': 'l2', 'classifier__solver': 'liblinear'}	4	standard	lda	logistic_regression	0.00890413
0.0556998	0.00439973	0.552925	0.0342909	0.564311	0.015176	{'classifier__C': 10, 'classifier__penalty': 'l1', 'classifier__solver': 'liblinear'}	1	standard	lda	logistic_regression	0.0113861
0.0341992	0.00379989	0.551583	0.0352715	0.562889	0.0149338	{'classifier__C': 10, 'classifier__penalty': 'l2', 'classifier__solver': 'liblinear'}	2	standard	lda	logistic_regression	0.0113066
0.0162003	0.0030005	0.61213	0.0290164	0.623644	0.00692981	{}	1	standard	lda	lda	0.0115137
0.016701	0.00350089	0.616162	0.0273414	0.633744	0.00755244	{}	1	standard	lda	gaussian_nb	0.0175825
0.170836	0.0136997	0.515849	0.028036	0.54119	0.0265766	{'classifier__max_depth': None, 'classifier__min_samples_leaf': 10, 'classifier__min_samples_split': 2, 'classifier__n_estimators': 100}	81	standard	lda	extra_trees	0.0253408
0.3192	0.0224003	0.509051	0.0339045	0.531991	0.0361264	{'classifier__max_depth': None, 'classifier__min_samples_leaf': 10, 'classifier__min_samples_split': 2, 'classifier__n_estimators': 200}	98	standard	lda	extra_trees	0.0229401
0.475	0.0292004	0.51715	0.035038	0.535955	0.0336494	{'classifier__max_depth': None, 'classifier__min_samples_leaf': 10, 'classifier__min_samples_split': 2, 'classifier__n_estimators': 300}	79	standard	lda	extra_trees	0.0188044
0.785877	0.0459996	0.511101	0.0259349	0.528623	0.018531	{'classifier__max_depth': None, 'classifier__min_samples_leaf': 10, 'classifier__min_samples_split': 2, 'classifier__n_estimators': 500}	91	standard	lda	extra_trees	0.0175223
0.1811	0.0136999	0.503079	0.0355342	0.526669	0.0282257	{'classifier__max_depth': None, 'classifier__min_samples_leaf': 10, 'classifier__min_samples_split': 10, 'classifier__n_estimators': 100}	104	standard	lda	extra_trees	0.0235903
0.320676	0.0205999	0.490931	0.0409963	0.51418	0.0348739	{'classifier__max_depth': None, 'classifier__min_samples_leaf': 10, 'classifier__min_samples_split': 10, 'classifier__n_estimators': 200}	107	standard	lda	extra_trees	0.0232492
0.467762	0.0322999	0.515137	0.0352733	0.531993	0.0282279	{'classifier__max_depth': None, 'classifier__min_samples_leaf': 10, 'classifier__min_samples_split': 10, 'classifier__n_estimators': 300}	83	standard	lda	extra_trees	0.0168562
0.793713	0.0479202	0.513763	0.029538	0.533116	0.028774	{'classifier__max_depth': None, 'classifier__min_samples_leaf': 10, 'classifier__min_samples_split': 10, 'classifier__n_estimators': 500}	87	standard	lda	extra_trees	0.0193528
0.172206	0.0134154	0.504371	0.0462641	0.518146	0.0510543	{'classifier__max_depth': None, 'classifier__min_samples_leaf': 10, 'classifier__min_samples_split': 20, 'classifier__n_estimators': 100}	103	standard	lda	extra_trees	0.0137744
0.3361	0.0224203	0.518506	0.0339015	0.539621	0.0318507	{'classifier__max_depth': None, 'classifier__min_samples_leaf': 10, 'classifier__min_samples_split': 20, 'classifier__n_estimators': 200}	77	standard	lda	extra_trees	0.0211146
0.479102	0.0292003	0.513105	0.0340122	0.528176	0.024542	{'classifier__max_depth': None, 'classifier__min_samples_leaf': 10, 'classifier__min_samples_split': 20, 'classifier__n_estimators': 300}	88	standard	lda	extra_trees	0.015071
0.781306	0.0451001	0.50979	0.0308616	0.529967	0.029906	{'classifier__max_depth': None, 'classifier__min_samples_leaf': 10, 'classifier__min_samples_split': 20, 'classifier__n_estimators': 500}	94	standard	lda	extra_trees	0.0201762
0.173801	0.0129998	0.514529	0.0403013	0.534902	0.0289411	{'classifier__max_depth': 10, 'classifier__min_samples_leaf': 10, 'classifier__min_samples_split': 2, 'classifier__n_estimators': 100}	84	standard	lda	extra_trees	0.0203726
0.3177	0.0207999	0.516466	0.0352847	0.529299	0.0384522	{'classifier__max_depth': 10, 'classifier__min_samples_leaf': 10, 'classifier__min_samples_split': 2, 'classifier__n_estimators': 200}	80	standard	lda	extra_trees	0.0128337
0.480165	0.0292001	0.508358	0.0342308	0.522419	0.0337778	{'classifier__max_depth': 10, 'classifier__min_samples_leaf': 10, 'classifier__min_samples_split': 2, 'classifier__n_estimators': 300}	99	standard	lda	extra_trees	0.0140613
0.755521	0.0445999	0.512434	0.0286838	0.532367	0.0287604	{'classifier__max_depth': 10, 'classifier__min_samples_leaf': 10, 'classifier__min_samples_split': 2, 'classifier__n_estimators': 500}	89	standard	lda	extra_trees	0.0199323
0.173481	0.013916	0.505034	0.0258717	0.522339	0.0276367	{'classifier__max_depth': 10, 'classifier__min_samples_leaf': 10, 'classifier__min_samples_split': 10, 'classifier__n_estimators': 100}	102	standard	lda	extra_trees	0.017305
0.3176	0.0206001	0.501682	0.0234382	0.522038	0.0143129	{'classifier__max_depth': 10, 'classifier__min_samples_leaf': 10, 'classifier__min_samples_split': 10, 'classifier__n_estimators': 200}	105	standard	lda	extra_trees	0.020356
0.4756	0.0303003	0.519821	0.029599	0.53626	0.0316344	{'classifier__max_depth': 10, 'classifier__min_samples_leaf': 10, 'classifier__min_samples_split': 10, 'classifier__n_estimators': 300}	76	standard	lda	extra_trees	0.0164385
0.7581	0.0440001	0.509768	0.0256103	0.52922	0.0306259	{'classifier__max_depth': 10, 'classifier__min_samples_leaf': 10, 'classifier__min_samples_split': 10, 'classifier__n_estimators': 500}	96	standard	lda	extra_trees	0.0194524
0.1713	0.0138002	0.501642	0.039398	0.526534	0.047183	{'classifier__max_depth': 10, 'classifier__min_samples_leaf': 10, 'classifier__min_samples_split': 20, 'classifier__n_estimators': 100}	106	standard	lda	extra_trees	0.0248919
0.322899	0.0221002	0.511128	0.0320947	0.529819	0.0293506	{'classifier__max_depth': 10, 'classifier__min_samples_leaf': 10, 'classifier__min_samples_split': 20, 'classifier__n_estimators': 200}	90	standard	lda	extra_trees	0.0186905
0.470954	0.0311997	0.509763	0.0265996	0.527873	0.0259638	{'classifier__max_depth': 10, 'classifier__min_samples_leaf': 10, 'classifier__min_samples_split': 20, 'classifier__n_estimators': 300}	97	standard	lda	extra_trees	0.0181096
0.767435	0.0430998	0.513808	0.0306522	0.530417	0.0345936	{'classifier__max_depth': 10, 'classifier__min_samples_leaf': 10, 'classifier__min_samples_split': 20, 'classifier__n_estimators': 500}	86	standard	lda	extra_trees	0.0166091
0.173286	0.0131163	0.528587	0.0229339	0.542317	0.0346298	{'classifier__max_depth': 20, 'classifier__min_samples_leaf': 10, 'classifier__min_samples_split': 2, 'classifier__n_estimators': 100}	74	standard	lda	extra_trees	0.0137302
0.317	0.0210997	0.511087	0.0325952	0.52593	0.0315518	{'classifier__max_depth': 20, 'classifier__min_samples_leaf': 10, 'classifier__min_samples_split': 2, 'classifier__n_estimators': 200}	92	standard	lda	extra_trees	0.0148426
0.4684	0.0288002	0.505723	0.0293819	0.525854	0.0255883	{'classifier__max_depth': 20, 'classifier__min_samples_leaf': 10, 'classifier__min_samples_split': 2, 'classifier__n_estimators': 300}	101	standard	lda	extra_trees	0.0201307
0.776075	0.0449748	0.514448	0.0312481	0.534761	0.0295774	{'classifier__max_depth': 20, 'classifier__min_samples_leaf': 10, 'classifier__min_samples_split': 2, 'classifier__n_estimators': 500}	85	standard	lda	extra_trees	0.0203133
0.1731	0.0133002	0.478093	0.0566279	0.497199	0.058154	{'classifier__max_depth': 20, 'classifier__min_samples_leaf': 10, 'classifier__min_samples_split': 10, 'classifier__n_estimators': 100}	108	standard	lda	extra_trees	0.0191064
0.3188	0.0209002	0.517835	0.0301461	0.539247	0.0302238	{'classifier__max_depth': 20, 'classifier__min_samples_leaf': 10, 'classifier__min_samples_split': 10, 'classifier__n_estimators': 200}	78	standard	lda	extra_trees	0.0214121
0.476934	0.0323238	0.515826	0.034811	0.536179	0.025912	{'classifier__max_depth': 20, 'classifier__min_samples_leaf': 10, 'classifier__min_samples_split': 10, 'classifier__n_estimators': 300}	82	standard	lda	extra_trees	0.0203523
0.774181	0.0464003	0.509781	0.0234627	0.535952	0.019302	{'classifier__max_depth': 20, 'classifier__min_samples_leaf': 10, 'classifier__min_samples_split': 10, 'classifier__n_estimators': 500}	95	standard	lda	extra_trees	0.0261708
0.181026	0.0152002	0.532015	0.0458885	0.549944	0.0454632	{'classifier__max_depth': 20, 'classifier__min_samples_leaf': 10, 'classifier__min_samples_split': 20, 'classifier__n_estimators': 100}	73	standard	lda	extra_trees	0.0179289
0.319718	0.0220004	0.525902	0.0248954	0.553465	0.0188709	{'classifier__max_depth': 20, 'classifier__min_samples_leaf': 10, 'classifier__min_samples_split': 20, 'classifier__n_estimators': 200}	75	standard	lda	extra_trees	0.0275624
0.4452	0.0243993	0.511083	0.0273187	0.523986	0.0289559	{'classifier__max_depth': 20, 'classifier__min_samples_leaf': 10, 'classifier__min_samples_split': 20, 'classifier__n_estimators': 300}	93	standard	lda	extra_trees	0.0129036
0.603199	0.0251997	0.506371	0.0281871	0.527055	0.0298845	{'classifier__max_depth': 20, 'classifier__min_samples_leaf': 10, 'classifier__min_samples_split': 20, 'classifier__n_estimators': 500}	100	standard	lda	extra_trees	0.0206841
338730545	0.00510051	0.62286	0.0261646	0.648784	0.00792368	{'classifier__alpha': 0.0001, 'classifier__hidden_layer_sizes': (50,)}	4	standard	lda	mlp	0.0259241
3410787868	0.00560005	0.62286	0.0306694	0.648335	0.0088102	{'classifier__alpha': 0.0001, 'classifier__hidden_layer_sizes': (100,)}	4	standard	lda	mlp	0.0254755
3290796661	0.00520015	0.621522	0.0216421	0.647063	0.00894887	{'classifier__alpha': 0.001, 'classifier__hidden_layer_sizes': (50,)}	6	standard	lda	mlp	0.0255408
3440594125	0.00579877	0.624202	0.0232734	0.647586	0.00872283	{'classifier__alpha': 0.001, 'classifier__hidden_layer_sizes': (100,)}	3	standard	lda	mlp	0.0233843
2937399101	0.00550005	0.621508	0.0285467	0.644968	0.00521025	{'classifier__alpha': 0.01, 'classifier__hidden_layer_sizes': (50,)}	7	standard	lda	mlp	0.02346
2858150387	0.00400007	0.626918	0.0250757	0.647886	0.00850829	{'classifier__alpha': 0.01, 'classifier__hidden_layer_sizes': (100,)}	1	standard	lda	mlp	0.0209681
1878362608	0.00320067	0.624868	0.0240265	0.652449	0.00894692	{'classifier__alpha': 0.01, 'classifier__hidden_layer_sizes': (50, 50)}	2	standard	lda	mlp	0.0275808
0.0412981	0.00950017	0.495629	0.029126	0.501758	0.00463719	{'classifier__C': 0.1, 'classifier__gamma': 'scale'}	5	standard	ica	svm_linear	0.00612982
0.0542997	0.00989842	0.495629	0.029126	0.501758	0.00463719	{'classifier__C': 0.1, 'classifier__gamma': 'auto'}	5	standard	ica	svm_linear	0.00612982
0.0546009	0.00946319	0.519871	0.0219921	0.525627	0.00313456	{'classifier__C': 1, 'classifier__gamma': 'scale'}	3	standard	ica	svm_linear	0.0057553
0.0525132	0.00931571	0.519871	0.0219921	0.525627	0.00313456	{'classifier__C': 1, 'classifier__gamma': 'auto'}	3	standard	ica	svm_linear	0.0057553
2376013117	0.0317062	0.615463	0.0229673	0.645043	0.00906202	{'classifier__C': 1, 'classifier__gamma': 'scale'}	1	yeo-johnson	nca	svm_rbf	0.0295796
211564273	0.0309002	0.626243	0.0234931	0.644369	0.00847224	{'classifier__C': 10, 'classifier__gamma': 'scale'}	1	quantile-normal	nca	svm_linear	0.0181263
0.0837008	0.025899	0.492277	0.0205559	0.495324	0.003276	{'classifier__C': 0.1, 'classifier__gamma': 'scale'}	5	standard	ica	svm_rbf	0.00304628
0.0957978	0.0286012	0.492277	0.0205559	0.495324	0.003276	{'classifier__C': 0.1, 'classifier__gamma': 'auto'}	5	standard	ica	svm_rbf	0.00304628
0.0862002	0.0274005	0.529285	0.027816	0.542462	0.00439043	{'classifier__C': 1, 'classifier__gamma': 'scale'}	1	standard	ica	svm_rbf	0.0131762
0.088999	0.0263322	0.529285	0.027816	0.542462	0.00439043	{'classifier__C': 1, 'classifier__gamma': 'auto'}	1	standard	ica	svm_rbf	0.0131762
0.142026	0.0246999	0.524578	0.0278438	0.552637	0.00377635	{'classifier__C': 10, 'classifier__gamma': 'scale'}	3	standard	ica	svm_rbf	0.0280591
0.130599	0.0190001	0.524578	0.0278438	0.552637	0.00377635	{'classifier__C': 10, 'classifier__gamma': 'auto'}	3	standard	ica	svm_rbf	0.0280591
0.0866973	0.0122007	0.447166	0.0312058	0.446913	0.00507269	{'classifier__C': 0.1, 'classifier__gamma': 'scale'}	1	standard	ica	svm_sigmoid	-0.000252455
0.0961974	0.0121	0.447166	0.0312058	0.446913	0.00507269	{'classifier__C': 0.1, 'classifier__gamma': 'auto'}	1	standard	ica	svm_sigmoid	-0.000252455
0.0734005	0.0114004	0.40404	0.032851	0.406359	0.00801772	{'classifier__C': 1, 'classifier__gamma': 'scale'}	3	standard	ica	svm_sigmoid	0.0023183
0.0740994	0.0116002	0.40404	0.032851	0.406359	0.00801772	{'classifier__C': 1, 'classifier__gamma': 'auto'}	3	standard	ica	svm_sigmoid	0.0023183
0.0652998	0.0108993	0.402018	0.0318232	0.40232	0.00940449	{'classifier__C': 10, 'classifier__gamma': 'scale'}	5	standard	ica	svm_sigmoid	0.000302121
0.0514996	0.00770035	0.402018	0.0318232	0.40232	0.00940449	{'classifier__C': 10, 'classifier__gamma': 'auto'}	5	standard	ica	svm_sigmoid	0.000302121
0.0235986	0.00380065	0.451873	0.0208991	0.450804	0.00171216	{'classifier__C': 0.1, 'classifier__penalty': 'l1', 'classifier__solver': 'liblinear'}	6	standard	ica	logistic_regression	-0.00106836
0.024701	0.00430119	0.453206	0.0252795	0.453124	0.00341109	{'classifier__C': 0.1, 'classifier__penalty': 'l2', 'classifier__solver': 'liblinear'}	5	standard	ica	logistic_regression	-8.2108e-05
0.0356985	0.0046999	0.46735	0.0216822	0.469884	0.00262059	{'classifier__C': 1, 'classifier__penalty': 'l1', 'classifier__solver': 'liblinear'}	4	standard	ica	logistic_regression	0.00253408
0.0280008	0.0044009	0.467359	0.0256907	0.467714	0.00310735	{'classifier__C': 1, 'classifier__penalty': 'l2', 'classifier__solver': 'liblinear'}	3	standard	ica	logistic_regression	0.000354854
1918970224	0.0270003	0.626243	0.0234931	0.644369	0.00847224	{'classifier__C': 10, 'classifier__gamma': 'auto'}	1	quantile-normal	nca	svm_linear	0.0181263
0.136698	0.00510032	0.623567	0.0211947	0.643622	0.00737775	{}	1	yeo-johnson	lda	lda	0.020055
0.0135999	0.00329983	0.517132	0.0327687	0.519416	0.00376161	{}	1	standard	ica	lda	0.00228361
0.0133002	0.00359955	0.487525	0.0279467	0.493903	0.00489383	{}	1	standard	ica	gaussian_nb	0.00637759
0.173314	0.0135998	0.391234	0.00864824	0.399177	0.0101993	{'classifier__max_depth': None, 'classifier__min_samples_leaf': 10, 'classifier__min_samples_split': 2, 'classifier__n_estimators': 100}	94	standard	ica	extra_trees	0.00794246
0.3167	0.0226001	0.389888	0.00915462	0.396783	0.0113499	{'classifier__max_depth': None, 'classifier__min_samples_leaf': 10, 'classifier__min_samples_split': 2, 'classifier__n_estimators': 200}	104	standard	ica	extra_trees	0.00689563
0.4845	0.0309998	0.391905	0.00701229	0.400299	0.00729656	{'classifier__max_depth': None, 'classifier__min_samples_leaf': 10, 'classifier__min_samples_split': 2, 'classifier__n_estimators': 300}	89	standard	ica	extra_trees	0.00839346
0.781183	0.0462991	0.392577	0.00877198	0.398279	0.00632033	{'classifier__max_depth': None, 'classifier__min_samples_leaf': 10, 'classifier__min_samples_split': 2, 'classifier__n_estimators': 500}	86	standard	ica	extra_trees	0.00570231
0.176701	0.0132995	0.39259	0.00934541	0.402621	0.0111188	{'classifier__max_depth': None, 'classifier__min_samples_leaf': 10, 'classifier__min_samples_split': 10, 'classifier__n_estimators': 100}	82	standard	ica	extra_trees	0.0100305
0.321764	0.0222179	0.391919	0.00831125	0.39723	0.00757388	{'classifier__max_depth': None, 'classifier__min_samples_leaf': 10, 'classifier__min_samples_split': 10, 'classifier__n_estimators': 200}	87	standard	ica	extra_trees	0.00531093
0.470473	0.0293005	0.390568	0.00762847	0.397905	0.00872736	{'classifier__max_depth': None, 'classifier__min_samples_leaf': 10, 'classifier__min_samples_split': 10, 'classifier__n_estimators': 300}	98	standard	ica	extra_trees	0.00733745
0.7725	0.0457998	0.391234	0.00866235	0.394762	0.00576707	{'classifier__max_depth': None, 'classifier__min_samples_leaf': 10, 'classifier__min_samples_split': 10, 'classifier__n_estimators': 500}	95	standard	ica	extra_trees	0.00352808
0.175501	0.0170001	0.39864	0.0106026	0.404043	0.0100413	{'classifier__max_depth': None, 'classifier__min_samples_leaf': 10, 'classifier__min_samples_split': 20, 'classifier__n_estimators': 100}	73	standard	ica	extra_trees	0.00540323
0.3303	0.0226999	0.393252	0.00991314	0.398579	0.00905705	{'classifier__max_depth': None, 'classifier__min_samples_leaf': 10, 'classifier__min_samples_split': 20, 'classifier__n_estimators': 200}	81	standard	ica	extra_trees	0.00532687
0.469309	0.0297319	0.392581	0.00843551	0.396334	0.00687571	{'classifier__max_depth': None, 'classifier__min_samples_leaf': 10, 'classifier__min_samples_split': 20, 'classifier__n_estimators': 300}	84	standard	ica	extra_trees	0.00375245
0.78234	0.0470996	0.391239	0.00936827	0.397007	0.00896709	{'classifier__max_depth': None, 'classifier__min_samples_leaf': 10, 'classifier__min_samples_split': 20, 'classifier__n_estimators': 500}	92	standard	ica	extra_trees	0.00576811
0.1674	0.0131003	0.393914	0.0137402	0.399554	0.0129342	{'classifier__max_depth': 10, 'classifier__min_samples_leaf': 10, 'classifier__min_samples_split': 2, 'classifier__n_estimators': 100}	77	standard	ica	extra_trees	0.00563987
0.312988	0.0206001	0.391915	0.00913799	0.399251	0.0119251	{'classifier__max_depth': 10, 'classifier__min_samples_leaf': 10, 'classifier__min_samples_split': 2, 'classifier__n_estimators': 200}	88	standard	ica	extra_trees	0.00733643
0.469428	0.0301453	0.38855	0.00651047	0.396633	0.00457005	{'classifier__max_depth': 10, 'classifier__min_samples_leaf': 10, 'classifier__min_samples_split': 2, 'classifier__n_estimators': 300}	107	standard	ica	extra_trees	0.00808295
0.75865	0.0457997	0.393252	0.00894477	0.399028	0.00673891	{'classifier__max_depth': 10, 'classifier__min_samples_leaf': 10, 'classifier__min_samples_split': 2, 'classifier__n_estimators': 500}	80	standard	ica	extra_trees	0.00577564
0.17036	0.0139	0.393266	0.0108579	0.398876	0.0149393	{'classifier__max_depth': 10, 'classifier__min_samples_leaf': 10, 'classifier__min_samples_split': 10, 'classifier__n_estimators': 100}	78	standard	ica	extra_trees	0.00560965
0.3189	0.0225999	0.391905	0.00873614	0.396259	0.00872089	{'classifier__max_depth': 10, 'classifier__min_samples_leaf': 10, 'classifier__min_samples_split': 10, 'classifier__n_estimators': 200}	89	standard	ica	extra_trees	0.00435339
0.465	0.0287998	0.391234	0.00866235	0.397606	0.00629124	{'classifier__max_depth': 10, 'classifier__min_samples_leaf': 10, 'classifier__min_samples_split': 10, 'classifier__n_estimators': 300}	95	standard	ica	extra_trees	0.00637212
0.7854	0.0468994	0.392586	0.0081152	0.398802	0.00782257	{'classifier__max_depth': 10, 'classifier__min_samples_leaf': 10, 'classifier__min_samples_split': 10, 'classifier__n_estimators': 500}	83	standard	ica	extra_trees	0.00621669
0.1694	0.0134999	0.393937	0.0112009	0.399251	0.0106351	{'classifier__max_depth': 10, 'classifier__min_samples_leaf': 10, 'classifier__min_samples_split': 20, 'classifier__n_estimators': 100}	76	standard	ica	extra_trees	0.00531438
0.32	0.0219002	0.389221	0.00686669	0.394089	0.00741162	{'classifier__max_depth': 10, 'classifier__min_samples_leaf': 10, 'classifier__min_samples_split': 20, 'classifier__n_estimators': 200}	105	standard	ica	extra_trees	0.00486808
0.463584	0.0289001	0.392577	0.00928442	0.398729	0.00699773	{'classifier__max_depth': 10, 'classifier__min_samples_leaf': 10, 'classifier__min_samples_split': 20, 'classifier__n_estimators': 300}	85	standard	ica	extra_trees	0.00615225
0.768129	0.0448005	0.391234	0.0075511	0.396634	0.00614384	{'classifier__max_depth': 10, 'classifier__min_samples_leaf': 10, 'classifier__min_samples_split': 20, 'classifier__n_estimators': 500}	95	standard	ica	extra_trees	0.00539917
0.1693	0.0136999	0.389901	0.0101986	0.396333	0.0098928	{'classifier__max_depth': 20, 'classifier__min_samples_leaf': 10, 'classifier__min_samples_split': 2, 'classifier__n_estimators': 100}	103	standard	ica	extra_trees	0.00643158
0.3154	0.0208998	0.393252	0.00944138	0.396783	0.00736153	{'classifier__max_depth': 20, 'classifier__min_samples_leaf': 10, 'classifier__min_samples_split': 2, 'classifier__n_estimators': 200}	79	standard	ica	extra_trees	0.00353103
0.462795	0.0283999	0.389212	0.00763568	0.394463	0.0060369	{'classifier__max_depth': 20, 'classifier__min_samples_leaf': 10, 'classifier__min_samples_split': 2, 'classifier__n_estimators': 300}	106	standard	ica	extra_trees	0.00525129
0.780457	0.0442995	0.390559	0.00775353	0.400225	0.00550122	{'classifier__max_depth': 20, 'classifier__min_samples_leaf': 10, 'classifier__min_samples_split': 2, 'classifier__n_estimators': 500}	101	standard	ica	extra_trees	0.00966593
0.176326	0.0146	0.390559	0.0118825	0.4006	0.0175353	{'classifier__max_depth': 20, 'classifier__min_samples_leaf': 10, 'classifier__min_samples_split': 10, 'classifier__n_estimators': 100}	101	standard	ica	extra_trees	0.0100416
0.3195	0.0217999	0.388545	0.00545489	0.394687	0.00517499	{'classifier__max_depth': 20, 'classifier__min_samples_leaf': 10, 'classifier__min_samples_split': 10, 'classifier__n_estimators': 200}	108	standard	ica	extra_trees	0.00614183
0.470095	0.028816	0.390568	0.00700448	0.396408	0.00537643	{'classifier__max_depth': 20, 'classifier__min_samples_leaf': 10, 'classifier__min_samples_split': 10, 'classifier__n_estimators': 300}	98	standard	ica	extra_trees	0.00584016
0.768758	0.044	0.391901	0.00905438	0.398878	0.00748222	{'classifier__max_depth': 20, 'classifier__min_samples_leaf': 10, 'classifier__min_samples_split': 10, 'classifier__n_estimators': 500}	91	standard	ica	extra_trees	0.00697724
0.168948	0.0133999	0.395937	0.0149219	0.402246	0.0141074	{'classifier__max_depth': 20, 'classifier__min_samples_leaf': 10, 'classifier__min_samples_split': 20, 'classifier__n_estimators': 100}	74	standard	ica	extra_trees	0.00630947
0.3154	0.0218999	0.390563	0.00798253	0.394687	0.00714326	{'classifier__max_depth': 20, 'classifier__min_samples_leaf': 10, 'classifier__min_samples_split': 20, 'classifier__n_estimators': 200}	100	standard	ica	extra_trees	0.00412421
0.452799	0.0250001	0.391239	0.00650807	0.394912	0.00606662	{'classifier__max_depth': 20, 'classifier__min_samples_leaf': 10, 'classifier__min_samples_split': 20, 'classifier__n_estimators': 300}	92	standard	ica	extra_trees	0.00367319
0.585059	0.0254996	0.394604	0.0105428	0.399926	0.00712207	{'classifier__max_depth': 20, 'classifier__min_samples_leaf': 10, 'classifier__min_samples_split': 20, 'classifier__n_estimators': 500}	75	standard	ica	extra_trees	0.00532232
4202874994	0.00510058	0.524578	0.0223636	0.550019	0.00591869	{'classifier__alpha': 0.0001, 'classifier__hidden_layer_sizes': (50,)}	9	standard	ica	mlp	0.0254403
0.250699	0.0121003	0.624252	0.0228895	0.639207	0.00473652	{'classifier__C': 1, 'classifier__gamma': 'scale'}	1	yeo-johnson	lda	svm_linear	0.0149555
39373245	0.00569973	0.527943	0.0212078	0.548223	0.00413497	{'classifier__alpha': 0.001, 'classifier__hidden_layer_sizes': (50,)}	2	standard	ica	mlp	0.02028
4922317696	0.00559967	0.525916	0.0250631	0.551889	0.00550834	{'classifier__alpha': 0.001, 'classifier__hidden_layer_sizes': (100,)}	7	standard	ica	mlp	0.0259732
4381670356	0.00529959	0.526596	0.0225755	0.554657	0.00417015	{'classifier__alpha': 0.001, 'classifier__hidden_layer_sizes': (50, 50)}	4	standard	ica	mlp	0.0280612
377898674	0.00500004	0.524583	0.0226736	0.548073	0.00403369	{'classifier__alpha': 0.01, 'classifier__hidden_layer_sizes': (50,)}	8	standard	ica	mlp	0.0234906
3600587702	0.00380039	0.527267	0.0241216	0.549345	0.00590408	{'classifier__alpha': 0.01, 'classifier__hidden_layer_sizes': (100,)}	3	standard	ica	mlp	0.0220777
2698593092	0.00330002	0.526592	0.0222673	0.552189	0.00439225	{'classifier__alpha': 0.01, 'classifier__hidden_layer_sizes': (50, 50)}	5	standard	ica	mlp	0.0255969
0.0619992	0.00930002	0.414157	0.013631	0.415487	0.0143138	{'classifier__C': 0.1, 'classifier__gamma': 'scale'}	4	standard	random_projection	svm_linear	0.0013294
0.0719996	0.00929954	0.427653	0.0325123	0.420499	0.0265823	{'classifier__C': 0.1, 'classifier__gamma': 'auto'}	1	standard	random_projection	svm_linear	-0.00715336
0.164872	0.00950041	0.402648	0.0382991	0.409881	0.0303213	{'classifier__C': 1, 'classifier__gamma': 'scale'}	5	standard	random_projection	svm_linear	0.00723296
0.183362	0.00970004	0.415531	0.0197243	0.419001	0.0214972	{'classifier__C': 1, 'classifier__gamma': 'auto'}	3	standard	random_projection	svm_linear	0.0034697
3787876368	0.00731404	0.395307	0.0220981	0.397752	0.0236721	{'classifier__C': 10, 'classifier__gamma': 'scale'}	6	standard	random_projection	svm_linear	0.00244554
834994905	0.0066004	0.422864	0.0184449	0.414447	0.0285527	{'classifier__C': 10, 'classifier__gamma': 'auto'}	2	standard	random_projection	svm_linear	-0.00841753
0.0948993	0.0263994	0.413427	0.0252916	0.419385	0.0207176	{'classifier__C': 0.1, 'classifier__gamma': 'scale'}	1	standard	random_projection	svm_rbf	0.00595787
0.156897	0.0286007	0.379136	0.00895892	0.380321	0.0101924	{'classifier__C': 0.1, 'classifier__gamma': 'auto'}	5	standard	random_projection	svm_rbf	0.00118496
0.154346	0.027845	0.405428	0.0229751	0.42768	0.0185109	{'classifier__C': 1, 'classifier__gamma': 'scale'}	4	standard	random_projection	svm_rbf	0.0222518
0.373895	0.0283002	0.411473	0.0211777	0.432321	0.0211295	{'classifier__C': 10, 'classifier__gamma': 'scale'}	2	standard	random_projection	svm_rbf	0.0208481
0.248799	0.0116997	0.624252	0.0228895	0.639207	0.00473652	{'classifier__C': 1, 'classifier__gamma': 'auto'}	1	yeo-johnson	lda	svm_linear	0.0149555
0.132924	0.015714	0.360267	0.023346	0.350916	0.0106411	{'classifier__C': 0.1, 'classifier__gamma': 'auto'}	2	standard	random_projection	svm_sigmoid	-0.00935069
0.0978003	0.0126386	0.334691	0.0355922	0.339095	0.0160115	{'classifier__C': 1, 'classifier__gamma': 'scale'}	3	standard	random_projection	svm_sigmoid	0.00440402
0.118298	0.0152003	0.285557	0.0289443	0.297492	0.0255318	{'classifier__C': 1, 'classifier__gamma': 'auto'}	6	standard	random_projection	svm_sigmoid	0.0119355
0.0893992	0.0123004	0.333312	0.0413486	0.327647	0.017631	{'classifier__C': 10, 'classifier__gamma': 'scale'}	4	standard	random_projection	svm_sigmoid	-0.00566509
0.0957008	0.0112994	0.3057	0.0247306	0.31066	0.0239762	{'classifier__C': 10, 'classifier__gamma': 'auto'}	5	standard	random_projection	svm_sigmoid	0.00496021
0.0188	0.00329988	0.403351	0.0194681	0.405614	0.0113972	{'classifier__C': 0.1, 'classifier__penalty': 'l1', 'classifier__solver': 'liblinear'}	4	standard	random_projection	logistic_regression	0.00226249
0.0161017	0.00349865	0.406113	0.0232396	0.410771	0.0160124	{'classifier__C': 0.1, 'classifier__penalty': 'l2', 'classifier__solver': 'liblinear'}	2	standard	random_projection	logistic_regression	0.00465812
0.0201005	0.00370085	0.393946	0.0194243	0.399774	0.0124775	{'classifier__C': 1, 'classifier__penalty': 'l1', 'classifier__solver': 'liblinear'}	6	standard	random_projection	logistic_regression	0.00582809
0.0196995	0.0033999	0.404013	0.0220037	0.403443	0.0136722	{'classifier__C': 1, 'classifier__penalty': 'l2', 'classifier__solver': 'liblinear'}	3	standard	random_projection	logistic_regression	-0.000570071
0.0202992	0.00369995	0.400648	0.0215116	0.406511	0.0146882	{'classifier__C': 10, 'classifier__penalty': 'l1', 'classifier__solver': 'liblinear'}	5	standard	random_projection	logistic_regression	0.00586244
4574139106	0.0121998	0.613459	0.0202017	0.636064	0.00905054	{'classifier__C': 0.1, 'classifier__gamma': 'scale'}	1	yeo-johnson	nca	svm_linear	0.0226052
0.0102996	0.00320005	0.403301	0.026136	0.404269	0.0175802	{}	1	standard	random_projection	lda	0.000968034
0.00980067	0.00390041	0.405333	0.0306315	0.425216	0.0184107	{}	1	standard	random_projection	gaussian_nb	0.0198827
0.1727	0.0148999	0.383153	0.0081131	0.385861	0.0118066	{'classifier__max_depth': None, 'classifier__min_samples_leaf': 5, 'classifier__min_samples_split': 2, 'classifier__n_estimators': 100}	34	standard	random_projection	extra_trees	0.00270723
0.3141	0.0221	0.377104	0.00269475	0.377852	0.00214374	{'classifier__max_depth': None, 'classifier__min_samples_leaf': 5, 'classifier__min_samples_split': 2, 'classifier__n_estimators': 200}	81	standard	random_projection	extra_trees	0.000748367
0.462796	0.0285997	0.377109	0.00327765	0.378151	0.00306309	{'classifier__max_depth': None, 'classifier__min_samples_leaf': 5, 'classifier__min_samples_split': 2, 'classifier__n_estimators': 300}	78	standard	random_projection	extra_trees	0.00104262
0.749574	0.0455	0.379131	0.00926985	0.383914	0.0092706	{'classifier__max_depth': None, 'classifier__min_samples_leaf': 5, 'classifier__min_samples_split': 2, 'classifier__n_estimators': 500}	55	standard	random_projection	extra_trees	0.00478237
0.1625	0.0132	0.384523	0.0151562	0.389148	0.0190716	{'classifier__max_depth': None, 'classifier__min_samples_leaf': 5, 'classifier__min_samples_split': 10, 'classifier__n_estimators': 100}	31	standard	random_projection	extra_trees	0.00462505
0.3076	0.0208993	0.379136	0.00895892	0.381967	0.0117764	{'classifier__max_depth': None, 'classifier__min_samples_leaf': 5, 'classifier__min_samples_split': 10, 'classifier__n_estimators': 200}	53	standard	random_projection	extra_trees	0.00283117
0.464367	0.0307235	0.384491	0.0151747	0.386685	0.016376	{'classifier__max_depth': None, 'classifier__min_samples_leaf': 5, 'classifier__min_samples_split': 10, 'classifier__n_estimators': 300}	33	standard	random_projection	extra_trees	0.0021935
0.767881	0.0453999	0.378446	0.00448115	0.380397	0.00635302	{'classifier__max_depth': None, 'classifier__min_samples_leaf': 5, 'classifier__min_samples_split': 10, 'classifier__n_estimators': 500}	67	standard	random_projection	extra_trees	0.00195094
0.15999	0.0130184	0.37846	0.00553263	0.378301	0.00296327	{'classifier__max_depth': None, 'classifier__min_samples_leaf': 5, 'classifier__min_samples_split': 20, 'classifier__n_estimators': 100}	63	standard	random_projection	extra_trees	-0.000159145
0.310736	0.0215997	0.377104	0.00269475	0.382343	0.00630535	{'classifier__max_depth': None, 'classifier__min_samples_leaf': 5, 'classifier__min_samples_split': 20, 'classifier__n_estimators': 200}	81	standard	random_projection	extra_trees	0.00523871
0.4661	0.0308003	0.381158	0.0128651	0.383015	0.0103708	{'classifier__max_depth': None, 'classifier__min_samples_leaf': 5, 'classifier__min_samples_split': 20, 'classifier__n_estimators': 300}	38	standard	random_projection	extra_trees	0.00185686
0.760569	0.0456002	0.379811	0.00806761	0.38249	0.00862235	{'classifier__max_depth': None, 'classifier__min_samples_leaf': 5, 'classifier__min_samples_split': 20, 'classifier__n_estimators': 500}	46	standard	random_projection	extra_trees	0.00267871
0.1618	0.0132	0.377775	0.00431577	0.377703	0.00384569	{'classifier__max_depth': None, 'classifier__min_samples_leaf': 10, 'classifier__min_samples_split': 2, 'classifier__n_estimators': 100}	77	standard	random_projection	extra_trees	-7.1802e-05
0.305036	0.0205	0.376433	0.0020013	0.377478	0.00307665	{'classifier__max_depth': None, 'classifier__min_samples_leaf': 10, 'classifier__min_samples_split': 2, 'classifier__n_estimators': 200}	84	standard	random_projection	extra_trees	0.00104515
0.453468	0.0287	0.378446	0.00617235	0.377254	0.0025018	{'classifier__max_depth': None, 'classifier__min_samples_leaf': 10, 'classifier__min_samples_split': 2, 'classifier__n_estimators': 300}	67	standard	random_projection	extra_trees	-0.00119204
0.745188	0.0437713	0.377104	0.00269475	0.377479	0.00317338	{'classifier__max_depth': None, 'classifier__min_samples_leaf': 10, 'classifier__min_samples_split': 2, 'classifier__n_estimators': 500}	81	standard	random_projection	extra_trees	0.000374787
0.1568	0.0129003	0.376433	0.0020013	0.37673	0.000851864	{'classifier__max_depth': None, 'classifier__min_samples_leaf': 10, 'classifier__min_samples_split': 10, 'classifier__n_estimators': 100}	84	standard	random_projection	extra_trees	0.000297201
0.301771	0.0210001	0.378446	0.00448115	0.377629	0.00252833	{'classifier__max_depth': None, 'classifier__min_samples_leaf': 10, 'classifier__min_samples_split': 10, 'classifier__n_estimators': 200}	67	standard	random_projection	extra_trees	-0.000817793
0.448824	0.0294	0.381811	0.0117349	0.379275	0.00558556	{'classifier__max_depth': None, 'classifier__min_samples_leaf': 10, 'classifier__min_samples_split': 10, 'classifier__n_estimators': 300}	36	standard	random_projection	extra_trees	-0.00253648
0.758155	0.0431527	0.376433	0.0020013	0.376431	0.000221608	{'classifier__max_depth': None, 'classifier__min_samples_leaf': 10, 'classifier__min_samples_split': 10, 'classifier__n_estimators': 500}	84	standard	random_projection	extra_trees	-1.976e-06
0.1634	0.0132002	0.376433	0.0020013	0.37673	0.000851864	{'classifier__max_depth': None, 'classifier__min_samples_leaf': 10, 'classifier__min_samples_split': 20, 'classifier__n_estimators': 100}	84	standard	random_projection	extra_trees	0.000297201
0.3019	0.0211012	0.379789	0.010068	0.378527	0.00631328	{'classifier__max_depth': None, 'classifier__min_samples_leaf': 10, 'classifier__min_samples_split': 20, 'classifier__n_estimators': 200}	52	standard	random_projection	extra_trees	-0.00126187
0.446079	0.0281001	0.376433	0.0020013	0.376431	0.000221608	{'classifier__max_depth': None, 'classifier__min_samples_leaf': 10, 'classifier__min_samples_split': 20, 'classifier__n_estimators': 300}	84	standard	random_projection	extra_trees	-1.976e-06
0.763901	0.0440007	0.378446	0.00617235	0.378153	0.00519136	{'classifier__max_depth': None, 'classifier__min_samples_leaf': 10, 'classifier__min_samples_split': 20, 'classifier__n_estimators': 500}	67	standard	random_projection	extra_trees	-0.000293841
0.1613	0.0132997	0.377784	0.00407034	0.382117	0.00620179	{'classifier__max_depth': 10, 'classifier__min_samples_leaf': 5, 'classifier__min_samples_split': 2, 'classifier__n_estimators': 100}	71	standard	random_projection	extra_trees	0.00433238
0.309099	0.0212002	0.381135	0.00808572	0.381895	0.00864548	{'classifier__max_depth': 10, 'classifier__min_samples_leaf': 5, 'classifier__min_samples_split': 2, 'classifier__n_estimators': 200}	40	standard	random_projection	extra_trees	0.000759295
0.459965	0.0286193	0.379131	0.00702902	0.381294	0.00911748	{'classifier__max_depth': 10, 'classifier__min_samples_leaf': 5, 'classifier__min_samples_split': 2, 'classifier__n_estimators': 300}	55	standard	random_projection	extra_trees	0.00216238
0.767771	0.0460347	0.379802	0.00463978	0.381069	0.00705251	{'classifier__max_depth': 10, 'classifier__min_samples_leaf': 5, 'classifier__min_samples_split': 2, 'classifier__n_estimators': 500}	51	standard	random_projection	extra_trees	0.00126658
0.1665	0.0136003	0.385843	0.0217554	0.391248	0.0279921	{'classifier__max_depth': 10, 'classifier__min_samples_leaf': 5, 'classifier__min_samples_split': 10, 'classifier__n_estimators': 100}	29	standard	random_projection	extra_trees	0.00540528
0.30972	0.0216345	0.381825	0.00558182	0.381668	0.00710237	{'classifier__max_depth': 10, 'classifier__min_samples_leaf': 5, 'classifier__min_samples_split': 10, 'classifier__n_estimators': 200}	35	standard	random_projection	extra_trees	-0.000156607
0.452969	0.0287998	0.37778	0.00361836	0.377778	0.00222227	{'classifier__max_depth': 10, 'classifier__min_samples_leaf': 5, 'classifier__min_samples_split': 10, 'classifier__n_estimators': 300}	76	standard	random_projection	extra_trees	-1.598e-06
0.761201	0.0456002	0.379811	0.00861493	0.382416	0.0120064	{'classifier__max_depth': 10, 'classifier__min_samples_leaf': 5, 'classifier__min_samples_split': 10, 'classifier__n_estimators': 500}	46	standard	random_projection	extra_trees	0.00260493
0.1612	0.0133999	0.381131	0.0119587	0.3795	0.00679865	{'classifier__max_depth': 10, 'classifier__min_samples_leaf': 5, 'classifier__min_samples_split': 20, 'classifier__n_estimators': 100}	41	standard	random_projection	extra_trees	-0.0016311
0.3025	0.0218005	0.379118	0.00621706	0.380247	0.00490436	{'classifier__max_depth': 10, 'classifier__min_samples_leaf': 5, 'classifier__min_samples_split': 20, 'classifier__n_estimators': 200}	61	standard	random_projection	extra_trees	0.00112898
0.457799	0.0293004	0.384532	0.0116767	0.388026	0.0125524	{'classifier__max_depth': 10, 'classifier__min_samples_leaf': 5, 'classifier__min_samples_split': 20, 'classifier__n_estimators': 300}	30	standard	random_projection	extra_trees	0.00349434
0.758299	0.0485001	0.384514	0.0122058	0.386308	0.0123062	{'classifier__max_depth': 10, 'classifier__min_samples_leaf': 5, 'classifier__min_samples_split': 20, 'classifier__n_estimators': 500}	32	standard	random_projection	extra_trees	0.00179423
0.1612	0.0132003	0.375762	0.00297598	0.377479	0.00317338	{'classifier__max_depth': 10, 'classifier__min_samples_leaf': 10, 'classifier__min_samples_split': 2, 'classifier__n_estimators': 100}	99	standard	random_projection	extra_trees	0.00171707
0.3104	0.0216999	0.379807	0.00893818	0.380621	0.00804526	{'classifier__max_depth': 10, 'classifier__min_samples_leaf': 10, 'classifier__min_samples_split': 2, 'classifier__n_estimators': 200}	48	standard	random_projection	extra_trees	0.000813838
0.460803	0.0291997	0.377784	0.00272707	0.377329	0.00287311	{'classifier__max_depth': 10, 'classifier__min_samples_leaf': 10, 'classifier__min_samples_split': 2, 'classifier__n_estimators': 300}	72	standard	random_projection	extra_trees	-0.000455795
0.744173	0.0437163	0.37846	0.00552158	0.379724	0.00538631	{'classifier__max_depth': 10, 'classifier__min_samples_leaf': 10, 'classifier__min_samples_split': 2, 'classifier__n_estimators': 500}	62	standard	random_projection	extra_trees	0.00126374
0.162903	0.0147	0.376433	0.0020013	0.376431	0.000221608	{'classifier__max_depth': 10, 'classifier__min_samples_leaf': 10, 'classifier__min_samples_split': 10, 'classifier__n_estimators': 100}	84	standard	random_projection	extra_trees	-1.976e-06
0.3081	0.0218002	0.378451	0.00379724	0.378976	0.00625683	{'classifier__max_depth': 10, 'classifier__min_samples_leaf': 10, 'classifier__min_samples_split': 10, 'classifier__n_estimators': 200}	66	standard	random_projection	extra_trees	0.000524641
0.447662	0.0296001	0.376433	0.0020013	0.376431	0.000221608	{'classifier__max_depth': 10, 'classifier__min_samples_leaf': 10, 'classifier__min_samples_split': 10, 'classifier__n_estimators': 300}	84	standard	random_projection	extra_trees	-1.976e-06
0.749287	0.0459184	0.377784	0.00506936	0.378974	0.00443234	{'classifier__max_depth': 10, 'classifier__min_samples_leaf': 10, 'classifier__min_samples_split': 10, 'classifier__n_estimators': 500}	72	standard	random_projection	extra_trees	0.00118979
0.1627	0.0135	0.376433	0.0020013	0.376431	0.000221608	{'classifier__max_depth': 10, 'classifier__min_samples_leaf': 10, 'classifier__min_samples_split': 20, 'classifier__n_estimators': 100}	84	standard	random_projection	extra_trees	-1.976e-06
0.305099	0.0214998	0.376433	0.0020013	0.376431	0.000221608	{'classifier__max_depth': 10, 'classifier__min_samples_leaf': 10, 'classifier__min_samples_split': 20, 'classifier__n_estimators': 200}	84	standard	random_projection	extra_trees	-1.976e-06
0.458587	0.0289001	0.377109	0.00327765	0.378077	0.00293676	{'classifier__max_depth': 10, 'classifier__min_samples_leaf': 10, 'classifier__min_samples_split': 20, 'classifier__n_estimators': 300}	78	standard	random_projection	extra_trees	0.00096844
0.737927	0.0447005	0.376433	0.0020013	0.376431	0.000221608	{'classifier__max_depth': 10, 'classifier__min_samples_leaf': 10, 'classifier__min_samples_split': 20, 'classifier__n_estimators': 500}	84	standard	random_projection	extra_trees	-1.976e-06
0.164345	0.0131002	0.378455	0.00297985	0.379423	0.00362266	{'classifier__max_depth': 20, 'classifier__min_samples_leaf': 5, 'classifier__min_samples_split': 2, 'classifier__n_estimators': 100}	65	standard	random_projection	extra_trees	0.000967809
0.323399	0.0210999	0.379807	0.00658544	0.38279	0.00707577	{'classifier__max_depth': 20, 'classifier__min_samples_leaf': 5, 'classifier__min_samples_split': 2, 'classifier__n_estimators': 200}	50	standard	random_projection	extra_trees	0.00298366
0.460076	0.0299004	0.379131	0.004692	0.38249	0.00814479	{'classifier__max_depth': 20, 'classifier__min_samples_leaf': 5, 'classifier__min_samples_split': 2, 'classifier__n_estimators': 300}	55	standard	random_projection	extra_trees	0.0033587
0.752643	0.0449371	0.379122	0.00490893	0.381219	0.0080518	{'classifier__max_depth': 20, 'classifier__min_samples_leaf': 5, 'classifier__min_samples_split': 2, 'classifier__n_estimators': 500}	60	standard	random_projection	extra_trees	0.00209683
0.1626	0.0135001	0.379127	0.00605734	0.380546	0.0062851	{'classifier__max_depth': 20, 'classifier__min_samples_leaf': 5, 'classifier__min_samples_split': 10, 'classifier__n_estimators': 100}	58	standard	random_projection	extra_trees	0.00141959
0.313473	0.0214557	0.381811	0.0105322	0.38728	0.017421	{'classifier__max_depth': 20, 'classifier__min_samples_leaf': 5, 'classifier__min_samples_split': 10, 'classifier__n_estimators': 200}	36	standard	random_projection	extra_trees	0.00546909
0.458893	0.0294001	0.379136	0.00661357	0.37875	0.00494948	{'classifier__max_depth': 20, 'classifier__min_samples_leaf': 5, 'classifier__min_samples_split': 10, 'classifier__n_estimators': 300}	54	standard	random_projection	extra_trees	-0.000386054
0.764669	0.0449003	0.381149	0.0101721	0.381893	0.00856016	{'classifier__max_depth': 20, 'classifier__min_samples_leaf': 5, 'classifier__min_samples_split': 10, 'classifier__n_estimators': 500}	39	standard	random_projection	extra_trees	0.000744347
0.1638	0.0132999	0.376433	0.0020013	0.378077	0.00263374	{'classifier__max_depth': 20, 'classifier__min_samples_leaf': 5, 'classifier__min_samples_split': 20, 'classifier__n_estimators': 100}	84	standard	random_projection	extra_trees	0.0016444
0.315469	0.0212	0.380464	0.0101768	0.382344	0.011294	{'classifier__max_depth': 20, 'classifier__min_samples_leaf': 5, 'classifier__min_samples_split': 20, 'classifier__n_estimators': 200}	44	standard	random_projection	extra_trees	0.00187959
0.46312	0.0299346	0.380469	0.00786471	0.381669	0.00918157	{'classifier__max_depth': 20, 'classifier__min_samples_leaf': 5, 'classifier__min_samples_split': 20, 'classifier__n_estimators': 300}	43	standard	random_projection	extra_trees	0.00120029
0.766473	0.0460994	0.376433	0.0020013	0.378377	0.00258553	{'classifier__max_depth': 20, 'classifier__min_samples_leaf': 5, 'classifier__min_samples_split': 20, 'classifier__n_estimators': 500}	84	standard	random_projection	extra_trees	0.0019438
0.161152	0.0133172	0.381131	0.0140379	0.378153	0.00519136	{'classifier__max_depth': 20, 'classifier__min_samples_leaf': 10, 'classifier__min_samples_split': 2, 'classifier__n_estimators': 100}	41	standard	random_projection	extra_trees	-0.0029784
0.306735	0.0220996	0.377109	0.00327765	0.376805	0.00107077	{'classifier__max_depth': 20, 'classifier__min_samples_leaf': 10, 'classifier__min_samples_split': 2, 'classifier__n_estimators': 200}	78	standard	random_projection	extra_trees	-0.000303679
0.4497	0.0290005	0.376433	0.0020013	0.377478	0.00307665	{'classifier__max_depth': 20, 'classifier__min_samples_leaf': 10, 'classifier__min_samples_split': 2, 'classifier__n_estimators': 300}	84	standard	random_projection	extra_trees	0.00104515
0.7524	0.0459	0.37846	0.00699082	0.379647	0.00884247	{'classifier__max_depth': 20, 'classifier__min_samples_leaf': 10, 'classifier__min_samples_split': 2, 'classifier__n_estimators': 500}	63	standard	random_projection	extra_trees	0.00118726
0.1631	0.0131999	0.376433	0.0020013	0.376431	0.000221608	{'classifier__max_depth': 20, 'classifier__min_samples_leaf': 10, 'classifier__min_samples_split': 10, 'classifier__n_estimators': 100}	84	standard	random_projection	extra_trees	-1.976e-06
0.3082	0.0207998	0.38046	0.0120482	0.379275	0.00855778	{'classifier__max_depth': 20, 'classifier__min_samples_leaf': 10, 'classifier__min_samples_split': 10, 'classifier__n_estimators': 200}	45	standard	random_projection	extra_trees	-0.00118451
0.457668	0.0300178	0.377784	0.00506936	0.378002	0.00394125	{'classifier__max_depth': 20, 'classifier__min_samples_leaf': 10, 'classifier__min_samples_split': 10, 'classifier__n_estimators': 300}	72	standard	random_projection	extra_trees	0.000217354
0.776242	0.0437168	0.375757	0.00234203	0.378377	0.00300343	{'classifier__max_depth': 20, 'classifier__min_samples_leaf': 10, 'classifier__min_samples_split': 10, 'classifier__n_estimators': 500}	100	standard	random_projection	extra_trees	0.0026193
0.171319	0.0143997	0.376433	0.0020013	0.378002	0.00350765	{'classifier__max_depth': 20, 'classifier__min_samples_leaf': 10, 'classifier__min_samples_split': 20, 'classifier__n_estimators': 100}	84	standard	random_projection	extra_trees	0.00156887
0.316086	0.0209174	0.379127	0.00605734	0.378676	0.0041263	{'classifier__max_depth': 20, 'classifier__min_samples_leaf': 10, 'classifier__min_samples_split': 20, 'classifier__n_estimators': 200}	58	standard	random_projection	extra_trees	-0.000450996
0.443286	0.0232	0.379807	0.00658544	0.380397	0.00557506	{'classifier__max_depth': 20, 'classifier__min_samples_leaf': 10, 'classifier__min_samples_split': 20, 'classifier__n_estimators': 300}	48	standard	random_projection	extra_trees	0.000589959
0.562571	0.0244677	0.377784	0.00272707	0.377628	0.00376991	{'classifier__max_depth': 20, 'classifier__min_samples_leaf': 10, 'classifier__min_samples_split': 20, 'classifier__n_estimators': 500}	72	standard	random_projection	extra_trees	-0.000156618
3673798013	0.00560093	0.412135	0.0293969	0.430153	0.0204956	{'classifier__alpha': 0.0001, 'classifier__hidden_layer_sizes': (50,)}	8	standard	random_projection	mlp	0.0180181
3723957133	0.00559955	0.422928	0.0319776	0.431947	0.0175221	{'classifier__alpha': 0.0001, 'classifier__hidden_layer_sizes': (100,)}	5	standard	random_projection	mlp	0.00901901
3532184887	0.00550039	0.414838	0.0316141	0.440173	0.0258237	{'classifier__alpha': 0.001, 'classifier__hidden_layer_sizes': (50,)}	7	standard	random_projection	mlp	0.025335
3294406843	0.00569971	0.424215	0.0275201	0.436212	0.0210838	{'classifier__alpha': 0.001, 'classifier__hidden_layer_sizes': (100,)}	3	standard	random_projection	mlp	0.0119963
3183037639	0.00550091	0.428972	0.0433309	0.435538	0.0305679	{'classifier__alpha': 0.01, 'classifier__hidden_layer_sizes': (50,)}	1	standard	random_projection	mlp	0.00656528
2905168724	0.00400009	0.410094	0.0203864	0.43943	0.022325	{'classifier__alpha': 0.01, 'classifier__hidden_layer_sizes': (100,)}	9	standard	random_projection	mlp	0.029336
0.0337018	0.00819938	0.519871	0.0234002	0.526001	0.00313502	{'classifier__C': 0.1, 'classifier__gamma': 'scale'}	5	standard	truncatedsvd	svm_linear	0.00612944
0.0470999	0.00889955	0.519871	0.0234002	0.525926	0.00308433	{'classifier__C': 0.1, 'classifier__gamma': 'auto'}	5	standard	truncatedsvd	svm_linear	0.00605459
0.0634802	0.00912263	0.522556	0.0248079	0.530265	0.00415675	{'classifier__C': 1, 'classifier__gamma': 'scale'}	3	standard	truncatedsvd	svm_linear	0.00770938
0.0668076	0.00940037	0.521885	0.0252239	0.530265	0.00415675	{'classifier__C': 1, 'classifier__gamma': 'auto'}	4	standard	truncatedsvd	svm_linear	0.00838053
0.17082	0.00839965	0.525249	0.0253016	0.530639	0.0038858	{'classifier__C': 10, 'classifier__gamma': 'scale'}	1	standard	truncatedsvd	svm_linear	0.00538995
0.1488	0.00720005	0.525249	0.0253016	0.530639	0.0038858	{'classifier__C': 10, 'classifier__gamma': 'auto'}	1	standard	truncatedsvd	svm_linear	0.00538995
0.0811963	0.0246002	0.496993	0.0260881	0.504153	0.00276162	{'classifier__C': 0.1, 'classifier__gamma': 'scale'}	5	standard	truncatedsvd	svm_rbf	0.00715924
0.133298	0.0284003	0.466008	0.0249975	0.482454	0.00502016	{'classifier__C': 0.1, 'classifier__gamma': 'auto'}	6	standard	truncatedsvd	svm_rbf	0.0164465
4590561745	0.0114997	0.613459	0.0202017	0.636064	0.00905054	{'classifier__C': 0.1, 'classifier__gamma': 'auto'}	1	yeo-johnson	nca	svm_linear	0.0226052
0.134398	0.0286001	0.525907	0.0273172	0.551665	0.00528254	{'classifier__C': 10, 'classifier__gamma': 'scale'}	2	standard	truncatedsvd	svm_rbf	0.0257579
0.0762992	0.0119001	0.470706	0.0251947	0.471081	0.00382287	{'classifier__C': 0.1, 'classifier__gamma': 'scale'}	1	standard	truncatedsvd	svm_sigmoid	0.000375643
0.117599	0.0144011	0.427635	0.0211705	0.426262	0.00652493	{'classifier__C': 0.1, 'classifier__gamma': 'auto'}	2	standard	truncatedsvd	svm_sigmoid	-0.00137281
0.0759005	0.0119995	0.412752	0.0322949	0.413767	0.00721428	{'classifier__C': 1, 'classifier__gamma': 'scale'}	3	standard	truncatedsvd	svm_sigmoid	0.00101507
0.101358	0.014974	0.37714	0.026502	0.369095	0.0184095	{'classifier__C': 1, 'classifier__gamma': 'auto'}	5	standard	truncatedsvd	svm_sigmoid	-0.00804556
0.0671164	0.0117	0.399329	0.0254208	0.397606	0.00824949	{'classifier__C': 10, 'classifier__gamma': 'scale'}	4	standard	truncatedsvd	svm_sigmoid	-0.00172261
0.0749988	0.0100007	0.360271	0.0165312	0.36094	0.0170361	{'classifier__C': 10, 'classifier__gamma': 'auto'}	6	standard	truncatedsvd	svm_sigmoid	0.000668891
0.0242017	0.00460022	0.460629	0.0268297	0.459933	0.00239133	{'classifier__C': 0.1, 'classifier__penalty': 'l1', 'classifier__solver': 'liblinear'}	6	standard	truncatedsvd	logistic_regression	-0.000696725
0.0248992	0.0048003	0.463994	0.025428	0.464123	0.00241179	{'classifier__C': 0.1, 'classifier__penalty': 'l2', 'classifier__solver': 'liblinear'}	5	standard	truncatedsvd	logistic_regression	0.000128773
0.0376003	0.00499988	0.470048	0.023904	0.470632	0.00212686	{'classifier__C': 1, 'classifier__penalty': 'l1', 'classifier__solver': 'liblinear'}	2	standard	truncatedsvd	logistic_regression	0.000584022
0.0268005	0.00380094	0.468035	0.0274414	0.468537	0.00276898	{'classifier__C': 1, 'classifier__penalty': 'l2', 'classifier__solver': 'liblinear'}	4	standard	truncatedsvd	logistic_regression	0.000501973
0.0342997	0.00439949	0.470048	0.0225464	0.47138	0.00173285	{'classifier__C': 10, 'classifier__penalty': 'l1', 'classifier__solver': 'liblinear'}	2	standard	truncatedsvd	logistic_regression	0.00133241
9686432939	0.0118999	0.620901	0.0172553	0.635766	0.00417378	{'classifier__C': 1, 'classifier__gamma': 'scale'}	1	quantile-uniform	nca	svm_linear	0.0148651
0.0115983	0.00309918	0.517132	0.0327687	0.519416	0.00376161	{}	1	standard	truncatedsvd	lda	0.00228361
9210516193	0.0114005	0.620901	0.0172553	0.635766	0.00417378	{'classifier__C': 1, 'classifier__gamma': 'auto'}	1	quantile-uniform	nca	svm_linear	0.0148651
0.319703	0.0215001	0.421486	0.0297708	0.445198	0.0310353	{'classifier__max_depth': None, 'classifier__min_samples_leaf': 5, 'classifier__min_samples_split': 20, 'classifier__n_estimators': 200}	66	standard	truncatedsvd	extra_trees	0.0237126
0.169943	0.0129999	0.387212	0.00574928	0.388852	0.00453862	{'classifier__max_depth': None, 'classifier__min_samples_leaf': 10, 'classifier__min_samples_split': 2, 'classifier__n_estimators': 100}	108	standard	truncatedsvd	extra_trees	0.00163946
0.320147	0.0218003	0.391239	0.00651745	0.393417	0.00616256	{'classifier__max_depth': None, 'classifier__min_samples_leaf': 10, 'classifier__min_samples_split': 2, 'classifier__n_estimators': 200}	77	standard	truncatedsvd	extra_trees	0.00217781
0.460669	0.0291996	0.388559	0.00822477	0.392143	0.00344744	{'classifier__max_depth': None, 'classifier__min_samples_leaf': 10, 'classifier__min_samples_split': 2, 'classifier__n_estimators': 300}	105	standard	truncatedsvd	extra_trees	0.00358421
0.80047	0.046139	0.389225	0.00714223	0.39364	0.00234918	{'classifier__max_depth': None, 'classifier__min_samples_leaf': 10, 'classifier__min_samples_split': 2, 'classifier__n_estimators': 500}	96	standard	truncatedsvd	extra_trees	0.0044145
0.166989	0.0131344	0.389892	0.00718516	0.394688	0.00466231	{'classifier__max_depth': None, 'classifier__min_samples_leaf': 10, 'classifier__min_samples_split': 10, 'classifier__n_estimators': 100}	90	standard	truncatedsvd	extra_trees	0.00479613
0.3191	0.0210003	0.389221	0.00687558	0.395137	0.00641011	{'classifier__max_depth': None, 'classifier__min_samples_leaf': 10, 'classifier__min_samples_split': 10, 'classifier__n_estimators': 200}	102	standard	truncatedsvd	extra_trees	0.00591598
0.473694	0.0291998	0.391243	0.00743002	0.392443	0.00165521	{'classifier__max_depth': None, 'classifier__min_samples_leaf': 10, 'classifier__min_samples_split': 10, 'classifier__n_estimators': 300}	75	standard	truncatedsvd	extra_trees	0.00119944
0.759978	0.0445002	0.389221	0.00619573	0.391695	0.00257878	{'classifier__max_depth': None, 'classifier__min_samples_leaf': 10, 'classifier__min_samples_split': 10, 'classifier__n_estimators': 500}	102	standard	truncatedsvd	extra_trees	0.00247399
0.1713	0.0132002	0.393252	0.0126968	0.396411	0.0130759	{'classifier__max_depth': None, 'classifier__min_samples_leaf': 10, 'classifier__min_samples_split': 20, 'classifier__n_estimators': 100}	73	standard	truncatedsvd	extra_trees	0.00315857
0.3178	0.0212998	0.389216	0.00662587	0.392593	0.00595455	{'classifier__max_depth': None, 'classifier__min_samples_leaf': 10, 'classifier__min_samples_split': 20, 'classifier__n_estimators': 200}	104	standard	truncatedsvd	extra_trees	0.003377
0.4699	0.0296002	0.391915	0.00864514	0.393266	0.0020412	{'classifier__max_depth': None, 'classifier__min_samples_leaf': 10, 'classifier__min_samples_split': 20, 'classifier__n_estimators': 300}	74	standard	truncatedsvd	extra_trees	0.00135131
0.771399	0.0437996	0.389901	0.00766313	0.392817	0.00197533	{'classifier__max_depth': None, 'classifier__min_samples_leaf': 10, 'classifier__min_samples_split': 20, 'classifier__n_estimators': 500}	85	standard	truncatedsvd	extra_trees	0.00291564
0.468769	0.0304999	0.424225	0.0197814	0.4529	0.0230663	{'classifier__max_depth': 10, 'classifier__min_samples_leaf': 5, 'classifier__min_samples_split': 20, 'classifier__n_estimators': 300}	58	standard	truncatedsvd	extra_trees	0.0286759
0.1674	0.0141999	0.390577	0.00750945	0.393865	0.00722505	{'classifier__max_depth': 10, 'classifier__min_samples_leaf': 10, 'classifier__min_samples_split': 2, 'classifier__n_estimators': 100}	79	standard	truncatedsvd	extra_trees	0.0032882
0.3143	0.0210997	0.390577	0.00750131	0.392817	0.0023388	{'classifier__max_depth': 10, 'classifier__min_samples_leaf': 10, 'classifier__min_samples_split': 2, 'classifier__n_estimators': 200}	78	standard	truncatedsvd	extra_trees	0.00223996
0.487703	0.0307997	0.391239	0.00936175	0.393043	0.00716144	{'classifier__max_depth': 10, 'classifier__min_samples_leaf': 10, 'classifier__min_samples_split': 2, 'classifier__n_estimators': 300}	76	standard	truncatedsvd	extra_trees	0.00180378
0.782198	0.0471538	0.389897	0.00742388	0.392592	0.00217085	{'classifier__max_depth': 10, 'classifier__min_samples_leaf': 10, 'classifier__min_samples_split': 2, 'classifier__n_estimators': 500}	89	standard	truncatedsvd	extra_trees	0.00269573
0.170103	0.0125998	0.38923	0.00952804	0.390497	0.0049269	{'classifier__max_depth': 10, 'classifier__min_samples_leaf': 10, 'classifier__min_samples_split': 10, 'classifier__n_estimators': 100}	93	standard	truncatedsvd	extra_trees	0.0012672
0.318881	0.0217082	0.389221	0.00688445	0.39147	0.00432636	{'classifier__max_depth': 10, 'classifier__min_samples_leaf': 10, 'classifier__min_samples_split': 10, 'classifier__n_estimators': 200}	101	standard	truncatedsvd	extra_trees	0.00224955
0.47029	0.0293999	0.389892	0.00834528	0.391695	0.00556662	{'classifier__max_depth': 10, 'classifier__min_samples_leaf': 10, 'classifier__min_samples_split': 10, 'classifier__n_estimators': 300}	90	standard	truncatedsvd	extra_trees	0.00180302
0.774369	0.0468011	0.390577	0.00808705	0.394538	0.00331442	{'classifier__max_depth': 10, 'classifier__min_samples_leaf': 10, 'classifier__min_samples_split': 10, 'classifier__n_estimators': 500}	79	standard	truncatedsvd	extra_trees	0.00396118
0.1684	0.0136998	0.389892	0.0111218	0.393716	0.0126073	{'classifier__max_depth': 10, 'classifier__min_samples_leaf': 10, 'classifier__min_samples_split': 20, 'classifier__n_estimators': 100}	90	standard	truncatedsvd	extra_trees	0.00382442
0.317035	0.0214998	0.38923	0.00673603	0.392368	0.00433791	{'classifier__max_depth': 10, 'classifier__min_samples_leaf': 10, 'classifier__min_samples_split': 20, 'classifier__n_estimators': 200}	93	standard	truncatedsvd	extra_trees	0.00313784
0.458367	0.0281001	0.389225	0.00774726	0.391021	0.00299652	{'classifier__max_depth': 10, 'classifier__min_samples_leaf': 10, 'classifier__min_samples_split': 20, 'classifier__n_estimators': 300}	96	standard	truncatedsvd	extra_trees	0.00179602
0.778198	0.0460997	0.389901	0.00636097	0.392667	0.00248676	{'classifier__max_depth': 10, 'classifier__min_samples_leaf': 10, 'classifier__min_samples_split': 20, 'classifier__n_estimators': 500}	85	standard	truncatedsvd	extra_trees	0.00276622
0.171199	0.0141005	0.387883	0.00631343	0.392293	0.0046507	{'classifier__max_depth': 20, 'classifier__min_samples_leaf': 10, 'classifier__min_samples_split': 2, 'classifier__n_estimators': 100}	107	standard	truncatedsvd	extra_trees	0.00440958
0.3229	0.0211002	0.389225	0.00714223	0.392892	0.00448744	{'classifier__max_depth': 20, 'classifier__min_samples_leaf': 10, 'classifier__min_samples_split': 2, 'classifier__n_estimators': 200}	98	standard	truncatedsvd	extra_trees	0.00366622
0.4963	0.0310001	0.389901	0.00766313	0.392144	0.00230488	{'classifier__max_depth': 20, 'classifier__min_samples_leaf': 10, 'classifier__min_samples_split': 2, 'classifier__n_estimators': 300}	85	standard	truncatedsvd	extra_trees	0.00224254
0.793	0.0484998	0.38855	0.00651047	0.392368	0.00224985	{'classifier__max_depth': 20, 'classifier__min_samples_leaf': 10, 'classifier__min_samples_split': 2, 'classifier__n_estimators': 500}	106	standard	truncatedsvd	extra_trees	0.00381822
0.185601	0.0151997	0.389225	0.00572275	0.393266	0.00634873	{'classifier__max_depth': 20, 'classifier__min_samples_leaf': 10, 'classifier__min_samples_split': 10, 'classifier__n_estimators': 100}	98	standard	truncatedsvd	extra_trees	0.00404069
0.330501	0.0219995	0.390568	0.00923804	0.394389	0.00308247	{'classifier__max_depth': 20, 'classifier__min_samples_leaf': 10, 'classifier__min_samples_split': 10, 'classifier__n_estimators': 200}	83	standard	truncatedsvd	extra_trees	0.00382094
0.4772	0.0312998	0.389225	0.00714223	0.390797	0.00265776	{'classifier__max_depth': 20, 'classifier__min_samples_leaf': 10, 'classifier__min_samples_split': 10, 'classifier__n_estimators': 300}	98	standard	truncatedsvd	extra_trees	0.00157114
0.793996	0.0460002	0.389901	0.00766313	0.393041	0.00324937	{'classifier__max_depth': 20, 'classifier__min_samples_leaf': 10, 'classifier__min_samples_split': 10, 'classifier__n_estimators': 500}	85	standard	truncatedsvd	extra_trees	0.0031403
0.1687	0.0136003	0.38923	0.00853032	0.391546	0.00598341	{'classifier__max_depth': 20, 'classifier__min_samples_leaf': 10, 'classifier__min_samples_split': 20, 'classifier__n_estimators': 100}	93	standard	truncatedsvd	extra_trees	0.00231606
0.314495	0.0219999	0.390568	0.00557185	0.392444	0.00316021	{'classifier__max_depth': 20, 'classifier__min_samples_leaf': 10, 'classifier__min_samples_split': 20, 'classifier__n_estimators': 200}	83	standard	truncatedsvd	extra_trees	0.00187579
0.450078	0.0256997	0.390572	0.00660739	0.391246	0.00362497	{'classifier__max_depth': 20, 'classifier__min_samples_leaf': 10, 'classifier__min_samples_split': 20, 'classifier__n_estimators': 300}	81	standard	truncatedsvd	extra_trees	0.000674094
0.618499	0.0261997	0.390572	0.00660739	0.392892	0.0015211	{'classifier__max_depth': 20, 'classifier__min_samples_leaf': 10, 'classifier__min_samples_split': 20, 'classifier__n_estimators': 500}	81	standard	truncatedsvd	extra_trees	0.00231951
4162466693	0.00540016	0.527952	0.0250039	0.54957	0.00546923	{'classifier__alpha': 0.0001, 'classifier__hidden_layer_sizes': (50,)}	3	standard	truncatedsvd	mlp	0.0216181
415746274	0.00569997	0.526592	0.0269159	0.551665	0.00515536	{'classifier__alpha': 0.0001, 'classifier__hidden_layer_sizes': (100,)}	4	standard	truncatedsvd	mlp	0.0250735
3871688914	0.00519988	0.526587	0.0225835	0.549495	0.00493605	{'classifier__alpha': 0.001, 'classifier__hidden_layer_sizes': (50,)}	5	standard	truncatedsvd	mlp	0.0229074
4013856483	0.00559986	0.524578	0.025761	0.553386	0.00436769	{'classifier__alpha': 0.001, 'classifier__hidden_layer_sizes': (100,)}	6	standard	truncatedsvd	mlp	0.0288079
1062087085	0.0110999	0.613459	0.0202017	0.63569	0.00893278	{'classifier__C': 1, 'classifier__gamma': 'scale'}	1	yeo-johnson	nca	svm_linear	0.0222309
338988719	0.00400043	0.531285	0.0268029	0.55361	0.00626637	{'classifier__alpha': 0.01, 'classifier__hidden_layer_sizes': (100,)}	2	standard	truncatedsvd	mlp	0.0223247
1173542285	0.0397957	0.556208	0.0160013	0.571118	0.00578082	{'classifier__C': 0.1, 'classifier__gamma': 'scale'}	5	standard	isomap	svm_linear	0.0149104
1307970977	0.0318258	0.556208	0.0160013	0.571118	0.00578082	{'classifier__C': 0.1, 'classifier__gamma': 'auto'}	5	standard	isomap	svm_linear	0.0149104
1004880451	0.0112002	0.613459	0.0202017	0.63569	0.00893278	{'classifier__C': 1, 'classifier__gamma': 'auto'}	1	yeo-johnson	nca	svm_linear	0.0222309
5501759984	0.0121999	0.620901	0.0161775	0.635467	0.00431766	{'classifier__C': 0.1, 'classifier__gamma': 'scale'}	1	quantile-uniform	nca	svm_linear	0.014566
4193634486	0.0155004	0.560249	0.0169881	0.572091	0.00537477	{'classifier__C': 10, 'classifier__gamma': 'scale'}	3	standard	isomap	svm_linear	0.0118424
3701878881	0.0147009	0.560249	0.0169881	0.572091	0.00537477	{'classifier__C': 10, 'classifier__gamma': 'auto'}	3	standard	isomap	svm_linear	0.0118424
108847754	0.0476433	0.552866	0.0207925	0.5474	0.00633511	{'classifier__C': 0.1, 'classifier__gamma': 'scale'}	3	standard	isomap	svm_rbf	-0.00546584
1244918847	0.0465016	0.385856	0.00775234	0.39566	0.00682946	{'classifier__C': 0.1, 'classifier__gamma': 'auto'}	6	standard	isomap	svm_rbf	0.00980387
1027115345	0.0620032	0.570356	0.0197041	0.578974	0.00614447	{'classifier__C': 1, 'classifier__gamma': 'scale'}	2	standard	isomap	svm_rbf	0.0086178
5481257465	0.0124135	0.620901	0.0161775	0.635467	0.00431766	{'classifier__C': 0.1, 'classifier__gamma': 'auto'}	1	quantile-uniform	nca	svm_linear	0.014566
1003572905	0.0247162	0.62963	0.0158849	0.635465	0.00840591	{}	1	quantile-normal	nca	lda	0.00583463
1149602985	0.0320001	0.445869	0.0385912	0.444216	0.0249776	{'classifier__C': 0.1, 'classifier__gamma': 'auto'}	4	standard	isomap	svm_sigmoid	-0.00165293
1047245765	0.0397432	0.487593	0.0241652	0.47542	0.00738127	{'classifier__C': 1, 'classifier__gamma': 'scale'}	2	standard	isomap	svm_sigmoid	-0.0121725
1132995486	0.0343337	0.402027	0.032248	0.395136	0.0354439	{'classifier__C': 1, 'classifier__gamma': 'auto'}	5	standard	isomap	svm_sigmoid	-0.00689073
1018409324	0.0301149	0.448481	0.0293578	0.439956	0.015392	{'classifier__C': 10, 'classifier__gamma': 'scale'}	3	standard	isomap	svm_sigmoid	-0.00852463
0.683184	0.0182986	0.351469	0.0462054	0.351744	0.0396928	{'classifier__C': 10, 'classifier__gamma': 'auto'}	6	standard	isomap	svm_sigmoid	0.000274976
1083272791	0.0453018	0.494953	0.0334	0.493751	0.0082482	{'classifier__C': 0.1, 'classifier__penalty': 'l1', 'classifier__solver': 'liblinear'}	5	standard	isomap	logistic_regression	-0.00120169
1123075819	0.0306963	0.493611	0.0322257	0.491881	0.00830298	{'classifier__C': 0.1, 'classifier__penalty': 'l2', 'classifier__solver': 'liblinear'}	6	standard	isomap	logistic_regression	-0.00172983
1087161613	0.0405575	0.504381	0.0295519	0.507668	0.00872464	{'classifier__C': 1, 'classifier__penalty': 'l1', 'classifier__solver': 'liblinear'}	3	standard	isomap	logistic_regression	0.00328793
1114648485	0.0369978	0.502358	0.0299325	0.502431	0.00896861	{'classifier__C': 1, 'classifier__penalty': 'l2', 'classifier__solver': 'liblinear'}	4	standard	isomap	logistic_regression	7.292e-05
1041166186	0.0331517	0.507754	0.0288742	0.509165	0.00849645	{'classifier__C': 10, 'classifier__penalty': 'l1', 'classifier__solver': 'liblinear'}	1	standard	isomap	logistic_regression	0.00141054
0.682949	0.0187017	0.506408	0.0291222	0.507893	0.00896382	{'classifier__C': 10, 'classifier__penalty': 'l2', 'classifier__solver': 'liblinear'}	2	standard	isomap	logistic_regression	0.00148551
9452841949	0.00639954	0.619495	0.0194887	0.634045	0.00706697	{}	1	quantile-uniform	nca	gaussian_nb	0.0145504
9463800645	0.00560081	0.612811	0.017969	0.626637	0.00561931	{}	1	quantile-uniform	nca	lda	0.0138261
0.935136	0.0282992	0.462579	0.0258951	0.471682	0.0370512	{'classifier__max_depth': None, 'classifier__min_samples_leaf': 10, 'classifier__min_samples_split': 2, 'classifier__n_estimators': 100}	74	standard	isomap	extra_trees	0.00910304
1084454513	0.0307998	0.455841	0.0268811	0.462783	0.0380864	{'classifier__max_depth': None, 'classifier__min_samples_leaf': 10, 'classifier__min_samples_split': 2, 'classifier__n_estimators': 200}	82	standard	isomap	extra_trees	0.00694187
1312972689	0.0409002	0.448449	0.022586	0.465621	0.0275279	{'classifier__max_depth': None, 'classifier__min_samples_leaf': 10, 'classifier__min_samples_split': 2, 'classifier__n_estimators': 300}	100	standard	isomap	extra_trees	0.0171723
1563020849	0.0579973	0.45453	0.0218035	0.469812	0.0303478	{'classifier__max_depth': None, 'classifier__min_samples_leaf': 10, 'classifier__min_samples_split': 2, 'classifier__n_estimators': 500}	85	standard	isomap	extra_trees	0.0152823
0.945094	0.0289195	0.452458	0.0337227	0.463081	0.0311339	{'classifier__max_depth': None, 'classifier__min_samples_leaf': 10, 'classifier__min_samples_split': 10, 'classifier__n_estimators': 100}	92	standard	isomap	extra_trees	0.0106232
1101049113	0.0309995	0.455854	0.0249876	0.469589	0.0261819	{'classifier__max_depth': None, 'classifier__min_samples_leaf': 10, 'classifier__min_samples_split': 10, 'classifier__n_estimators': 200}	81	standard	isomap	extra_trees	0.0137347
124308269	0.039198	0.441053	0.0240362	0.455747	0.0348466	{'classifier__max_depth': None, 'classifier__min_samples_leaf': 10, 'classifier__min_samples_split': 10, 'classifier__n_estimators': 300}	107	standard	isomap	extra_trees	0.0146937
1523823261	0.0637393	0.446436	0.0167508	0.458965	0.0250724	{'classifier__max_depth': None, 'classifier__min_samples_leaf': 10, 'classifier__min_samples_split': 10, 'classifier__n_estimators': 500}	102	standard	isomap	extra_trees	0.012529
0.96129	0.0257014	0.45112	0.027951	0.463756	0.0392511	{'classifier__max_depth': None, 'classifier__min_samples_leaf': 10, 'classifier__min_samples_split': 20, 'classifier__n_estimators': 100}	96	standard	isomap	extra_trees	0.0126355
1111183357	0.033001	0.460552	0.0433801	0.474005	0.0455495	{'classifier__max_depth': None, 'classifier__min_samples_leaf': 10, 'classifier__min_samples_split': 20, 'classifier__n_estimators': 200}	75	standard	isomap	extra_trees	0.0134531
1233740044	0.0432004	0.45853	0.0259945	0.466596	0.0223344	{'classifier__max_depth': None, 'classifier__min_samples_leaf': 10, 'classifier__min_samples_split': 20, 'classifier__n_estimators': 300}	77	standard	isomap	extra_trees	0.00806632
1516344786	0.0543194	0.451147	0.0182374	0.462779	0.0274218	{'classifier__max_depth': None, 'classifier__min_samples_leaf': 10, 'classifier__min_samples_split': 20, 'classifier__n_estimators': 500}	95	standard	isomap	extra_trees	0.0116321
0.984784	0.0243002	0.456562	0.023418	0.474075	0.0368482	{'classifier__max_depth': 10, 'classifier__min_samples_leaf': 10, 'classifier__min_samples_split': 2, 'classifier__n_estimators': 100}	79	standard	isomap	extra_trees	0.0175136
1110570121	0.0311003	0.452476	0.0251302	0.464054	0.0360538	{'classifier__max_depth': 10, 'classifier__min_samples_leaf': 10, 'classifier__min_samples_split': 2, 'classifier__n_estimators': 200}	91	standard	isomap	extra_trees	0.0115784
1234988046	0.0398532	0.452494	0.0202656	0.461881	0.0294746	{'classifier__max_depth': 10, 'classifier__min_samples_leaf': 10, 'classifier__min_samples_split': 2, 'classifier__n_estimators': 300}	90	standard	isomap	extra_trees	0.00938711
1498256183	0.0546003	0.443062	0.0175586	0.453952	0.0259943	{'classifier__max_depth': 10, 'classifier__min_samples_leaf': 10, 'classifier__min_samples_split': 2, 'classifier__n_estimators': 500}	106	standard	isomap	extra_trees	0.0108904
0.957437	0.0258001	0.463223	0.0346631	0.476699	0.0422881	{'classifier__max_depth': 10, 'classifier__min_samples_leaf': 10, 'classifier__min_samples_split': 10, 'classifier__n_estimators': 100}	73	standard	isomap	extra_trees	0.0134753
108358624	0.0331291	0.459201	0.0269163	0.467197	0.0378204	{'classifier__max_depth': 10, 'classifier__min_samples_leaf': 10, 'classifier__min_samples_split': 10, 'classifier__n_estimators': 200}	76	standard	isomap	extra_trees	0.00799639
1265757966	0.0421973	0.450472	0.013439	0.461358	0.0253881	{'classifier__max_depth': 10, 'classifier__min_samples_leaf': 10, 'classifier__min_samples_split': 10, 'classifier__n_estimators': 300}	97	standard	isomap	extra_trees	0.0108868
1549451876	0.053597	0.453845	0.021765	0.468094	0.0266593	{'classifier__max_depth': 10, 'classifier__min_samples_leaf': 10, 'classifier__min_samples_split': 10, 'classifier__n_estimators': 500}	86	standard	isomap	extra_trees	0.0142482
0.953258	0.0266987	0.44907	0.0421522	0.460316	0.0409154	{'classifier__max_depth': 10, 'classifier__min_samples_leaf': 10, 'classifier__min_samples_split': 20, 'classifier__n_estimators': 100}	99	standard	isomap	extra_trees	0.0112457
1094070625	0.0342103	0.455859	0.0260975	0.465248	0.0273898	{'classifier__max_depth': 10, 'classifier__min_samples_leaf': 10, 'classifier__min_samples_split': 20, 'classifier__n_estimators': 200}	80	standard	isomap	extra_trees	0.00938959
1228453946	0.0381997	0.451809	0.0320182	0.467794	0.0343785	{'classifier__max_depth': 10, 'classifier__min_samples_leaf': 10, 'classifier__min_samples_split': 20, 'classifier__n_estimators': 300}	94	standard	isomap	extra_trees	0.0159851
1557901645	0.0548008	0.445093	0.0218811	0.46293	0.0319233	{'classifier__max_depth': 10, 'classifier__min_samples_leaf': 10, 'classifier__min_samples_split': 20, 'classifier__n_estimators': 500}	104	standard	isomap	extra_trees	0.0178366
0.953328	0.0286019	0.447751	0.026898	0.454403	0.0345301	{'classifier__max_depth': 20, 'classifier__min_samples_leaf': 10, 'classifier__min_samples_split': 2, 'classifier__n_estimators': 100}	101	standard	isomap	extra_trees	0.00665224
1085591102	0.0335237	0.443738	0.0223229	0.454851	0.0325675	{'classifier__max_depth': 20, 'classifier__min_samples_leaf': 10, 'classifier__min_samples_split': 2, 'classifier__n_estimators': 200}	105	standard	isomap	extra_trees	0.0111136
1243841338	0.0415994	0.453161	0.0270822	0.468542	0.0366416	{'classifier__max_depth': 20, 'classifier__min_samples_leaf': 10, 'classifier__min_samples_split': 2, 'classifier__n_estimators': 300}	87	standard	isomap	extra_trees	0.0153814
1515780282	0.0550001	0.457178	0.0324486	0.467497	0.0340993	{'classifier__max_depth': 20, 'classifier__min_samples_leaf': 10, 'classifier__min_samples_split': 2, 'classifier__n_estimators': 500}	78	standard	isomap	extra_trees	0.0103185
0.944906	0.0286973	0.433008	0.0172681	0.448933	0.0269483	{'classifier__max_depth': 20, 'classifier__min_samples_leaf': 10, 'classifier__min_samples_split': 10, 'classifier__n_estimators': 100}	108	standard	isomap	extra_trees	0.0159243
1090795946	0.0328012	0.451832	0.0233882	0.463899	0.0302326	{'classifier__max_depth': 20, 'classifier__min_samples_leaf': 10, 'classifier__min_samples_split': 10, 'classifier__n_estimators': 200}	93	standard	isomap	extra_trees	0.0120674
1247261047	0.0396015	0.455197	0.0256987	0.471234	0.039839	{'classifier__max_depth': 20, 'classifier__min_samples_leaf': 10, 'classifier__min_samples_split': 10, 'classifier__n_estimators': 300}	84	standard	isomap	extra_trees	0.0160372
1519981885	0.0547985	0.452503	0.0214196	0.466893	0.0337974	{'classifier__max_depth': 20, 'classifier__min_samples_leaf': 10, 'classifier__min_samples_split': 10, 'classifier__n_estimators': 500}	89	standard	isomap	extra_trees	0.0143899
0.964493	0.0285009	0.4498	0.0301455	0.464127	0.0382115	{'classifier__max_depth': 20, 'classifier__min_samples_leaf': 10, 'classifier__min_samples_split': 20, 'classifier__n_estimators': 100}	98	standard	isomap	extra_trees	0.0143262
1109641266	0.0340025	0.455201	0.0258142	0.475724	0.0387218	{'classifier__max_depth': 20, 'classifier__min_samples_leaf': 10, 'classifier__min_samples_split': 20, 'classifier__n_estimators': 200}	83	standard	isomap	extra_trees	0.0205222
1254263592	0.0335	0.446422	0.0211961	0.461511	0.0305098	{'classifier__max_depth': 20, 'classifier__min_samples_leaf': 10, 'classifier__min_samples_split': 20, 'classifier__n_estimators': 300}	103	standard	isomap	extra_trees	0.0150887
1347454357	0.0351998	0.453161	0.0249677	0.471161	0.0396649	{'classifier__max_depth': 20, 'classifier__min_samples_leaf': 10, 'classifier__min_samples_split': 20, 'classifier__n_estimators': 500}	87	standard	isomap	extra_trees	0.0179998
4008508635	0.0194991	0.575054	0.0261142	0.594089	0.00807087	{'classifier__alpha': 0.0001, 'classifier__hidden_layer_sizes': (50,)}	7	standard	isomap	mlp	0.0190344
3966992116	0.0199995	0.575068	0.0179765	0.598429	0.00662416	{'classifier__alpha': 0.0001, 'classifier__hidden_layer_sizes': (100,)}	6	standard	isomap	mlp	0.0233609
3340134001	0.0184994	0.573689	0.0237895	0.602843	0.00927188	{'classifier__alpha': 0.0001, 'classifier__hidden_layer_sizes': (50, 50)}	8	standard	isomap	mlp	0.0291532
3891137767	0.0200191	0.578415	0.0273471	0.596633	0.00780439	{'classifier__alpha': 0.001, 'classifier__hidden_layer_sizes': (50,)}	3	standard	isomap	mlp	0.018218
3690497494	0.0179352	0.578428	0.0206513	0.599027	0.00615973	{'classifier__alpha': 0.001, 'classifier__hidden_layer_sizes': (100,)}	2	standard	isomap	mlp	0.0205987
363412385	0.0190005	0.577775	0.023931	0.595287	0.00881253	{'classifier__alpha': 0.01, 'classifier__hidden_layer_sizes': (50,)}	4	standard	isomap	mlp	0.0175117
3318467855	0.0152994	0.576406	0.0247666	0.596035	0.00871555	{'classifier__alpha': 0.01, 'classifier__hidden_layer_sizes': (100,)}	5	standard	isomap	mlp	0.0196288
290287869	0.0119996	0.582491	0.0254984	0.604414	0.00752403	{'classifier__alpha': 0.01, 'classifier__hidden_layer_sizes': (50, 50)}	1	standard	isomap	mlp	0.021923
0.293208	0.0257922	0.376433	0.0020013	0.376431	0.000221608	{'classifier__C': 0.1, 'classifier__gamma': 'scale'}	3	standard	lle	svm_linear	-1.976e-06
0.327522	0.0290144	0.376433	0.0020013	0.376431	0.000221608	{'classifier__C': 0.1, 'classifier__gamma': 'auto'}	3	standard	lle	svm_linear	-1.976e-06
0.310457	0.0282987	0.375762	0.00297598	0.376805	0.0011658	{'classifier__C': 1, 'classifier__gamma': 'scale'}	5	standard	lle	svm_linear	0.00104342
0.324899	0.0307001	0.375762	0.00297598	0.376805	0.0011658	{'classifier__C': 1, 'classifier__gamma': 'auto'}	5	standard	lle	svm_linear	0.00104342
952259438	0.00510058	0.614806	0.018638	0.62499	0.00994235	{}	1	yeo-johnson	nca	lda	0.0101841
5.01371	0.00254397	0.592599	0.024755	0.621848	0.00682183	{}	1	minmax	nca	lda	0.029249
0.330399	0.0392009	0.444449	0.0215037	0.445866	0.0198716	{'classifier__C': 0.1, 'classifier__gamma': 'scale'}	3	standard	lle	svm_rbf	0.00141668
0.361999	0.0459013	0.376433	0.0020013	0.376431	0.000221608	{'classifier__C': 0.1, 'classifier__gamma': 'auto'}	5	standard	lle	svm_rbf	-1.976e-06
0.335817	0.0427	0.488241	0.0275109	0.49607	0.0219213	{'classifier__C': 1, 'classifier__gamma': 'scale'}	2	standard	lle	svm_rbf	0.0078284
0.3763	0.0439993	0.376433	0.0020013	0.376805	0.0011658	{'classifier__C': 1, 'classifier__gamma': 'auto'}	5	standard	lle	svm_rbf	0.000372276
0.371833	0.0391012	0.509781	0.0286083	0.53004	0.0175406	{'classifier__C': 10, 'classifier__gamma': 'scale'}	1	standard	lle	svm_rbf	0.0202582
0.25717	0.0321017	0.41077	0.0145564	0.41594	0.016221	{'classifier__C': 10, 'classifier__gamma': 'auto'}	4	standard	lle	svm_rbf	0.00516981
0.335364	0.0275011	0.415491	0.011257	0.42013	0.0152047	{'classifier__C': 0.1, 'classifier__gamma': 'scale'}	2	standard	lle	svm_sigmoid	0.00463915
0.349464	0.0296009	0.376433	0.0020013	0.376431	0.000221608	{'classifier__C': 0.1, 'classifier__gamma': 'auto'}	5	standard	lle	svm_sigmoid	-1.976e-06
0.342567	0.0298	0.423531	0.0258011	0.430756	0.0191523	{'classifier__C': 1, 'classifier__gamma': 'scale'}	1	standard	lle	svm_sigmoid	0.00722489
0.3736	0.0310009	0.376433	0.0020013	0.376431	0.000221608	{'classifier__C': 1, 'classifier__gamma': 'auto'}	5	standard	lle	svm_sigmoid	-1.976e-06
0.3281	0.0280004	0.410017	0.0473086	0.41295	0.029445	{'classifier__C': 10, 'classifier__gamma': 'scale'}	3	standard	lle	svm_sigmoid	0.00293254
0.239503	0.0198991	0.38114	0.00882918	0.381969	0.0117865	{'classifier__C': 10, 'classifier__gamma': 'auto'}	4	standard	lle	svm_sigmoid	0.000829386
0.2668	0.0239998	0.376433	0.0020013	0.376431	0.000221608	{'classifier__C': 0.1, 'classifier__penalty': 'l1', 'classifier__solver': 'liblinear'}	4	standard	lle	logistic_regression	-1.976e-06
0.295078	0.0229008	0.376433	0.0020013	0.376431	0.000221608	{'classifier__C': 0.1, 'classifier__penalty': 'l2', 'classifier__solver': 'liblinear'}	4	standard	lle	logistic_regression	-1.976e-06
0.2901	0.0266013	0.4155	0.0155703	0.414966	0.0126363	{'classifier__C': 1, 'classifier__penalty': 'l1', 'classifier__solver': 'liblinear'}	2	standard	lle	logistic_regression	-0.000534035
0.3127	0.0240997	0.376433	0.0020013	0.376431	0.000221608	{'classifier__C': 1, 'classifier__penalty': 'l2', 'classifier__solver': 'liblinear'}	4	standard	lle	logistic_regression	-1.976e-06
0.3052	0.0237992	0.437738	0.0284666	0.436739	0.014438	{'classifier__C': 10, 'classifier__penalty': 'l1', 'classifier__solver': 'liblinear'}	1	standard	lle	logistic_regression	-0.000998669
0.201499	0.0157	0.393919	0.0138697	0.397383	0.0144529	{'classifier__C': 10, 'classifier__penalty': 'l2', 'classifier__solver': 'liblinear'}	3	standard	lle	logistic_regression	0.00346423
0.105199	0.0121998	0.604712	0.0248247	0.619902	0.0113557	{'classifier__C': 10, 'classifier__gamma': 'scale'}	1	minmax	lda	svm_poly	0.0151908
0.154903	0.0140988	0.475431	0.0363855	0.475047	0.0202298	{}	1	standard	lle	gaussian_nb	-0.00038383
0.4174	0.0320996	0.387901	0.0195411	0.392516	0.02249	{'classifier__max_depth': None, 'classifier__min_samples_leaf': 5, 'classifier__min_samples_split': 2, 'classifier__n_estimators': 100}	52	standard	lle	extra_trees	0.00461488
0.574577	0.0424005	0.388541	0.0196901	0.399405	0.0370014	{'classifier__max_depth': None, 'classifier__min_samples_leaf': 5, 'classifier__min_samples_split': 2, 'classifier__n_estimators': 200}	51	standard	lle	extra_trees	0.0108646
0.752766	0.0473001	0.386509	0.0172699	0.398659	0.0372329	{'classifier__max_depth': None, 'classifier__min_samples_leaf': 5, 'classifier__min_samples_split': 2, 'classifier__n_estimators': 300}	62	standard	lle	extra_trees	0.0121496
1030002975	0.0664354	0.387208	0.0204722	0.393418	0.0310998	{'classifier__max_depth': None, 'classifier__min_samples_leaf': 5, 'classifier__min_samples_split': 2, 'classifier__n_estimators': 500}	56	standard	lle	extra_trees	0.00621009
0.414538	0.0328	0.395275	0.0265343	0.406887	0.0420855	{'classifier__max_depth': None, 'classifier__min_samples_leaf': 5, 'classifier__min_samples_split': 10, 'classifier__n_estimators': 100}	38	standard	lle	extra_trees	0.0116121
0.579021	0.0430999	0.386527	0.0191537	0.394091	0.0360834	{'classifier__max_depth': None, 'classifier__min_samples_leaf': 5, 'classifier__min_samples_split': 10, 'classifier__n_estimators': 200}	60	standard	lle	extra_trees	0.00756412
0.7251	0.0497999	0.389878	0.0215652	0.397835	0.0352416	{'classifier__max_depth': None, 'classifier__min_samples_leaf': 5, 'classifier__min_samples_split': 10, 'classifier__n_estimators': 300}	48	standard	lle	extra_trees	0.00795613
1031353235	0.0663985	0.386523	0.0208666	0.394616	0.035407	{'classifier__max_depth': None, 'classifier__min_samples_leaf': 5, 'classifier__min_samples_split': 10, 'classifier__n_estimators': 500}	61	standard	lle	extra_trees	0.00809372
0.416361	0.0322001	0.385158	0.0178437	0.391625	0.034856	{'classifier__max_depth': None, 'classifier__min_samples_leaf': 5, 'classifier__min_samples_split': 20, 'classifier__n_estimators': 100}	66	standard	lle	extra_trees	0.00646724
0.580567	0.0408001	0.395302	0.0266363	0.399999	0.0303337	{'classifier__max_depth': None, 'classifier__min_samples_leaf': 5, 'classifier__min_samples_split': 20, 'classifier__n_estimators': 200}	37	standard	lle	extra_trees	0.00469748
0.736955	0.0493004	0.391239	0.0198693	0.400001	0.033486	{'classifier__max_depth': None, 'classifier__min_samples_leaf': 5, 'classifier__min_samples_split': 20, 'classifier__n_estimators': 300}	43	standard	lle	extra_trees	0.00876251
1028101563	0.0646	0.38787	0.017079	0.395512	0.0237395	{'classifier__max_depth': None, 'classifier__min_samples_leaf': 5, 'classifier__min_samples_split': 20, 'classifier__n_estimators': 500}	53	standard	lle	extra_trees	0.00764259
0.427099	0.0327003	0.378446	0.00617235	0.379949	0.0105782	{'classifier__max_depth': None, 'classifier__min_samples_leaf': 10, 'classifier__min_samples_split': 2, 'classifier__n_estimators': 100}	99	standard	lle	extra_trees	0.00150257
0.560976	0.0400156	0.379118	0.00810417	0.381072	0.0139459	{'classifier__max_depth': None, 'classifier__min_samples_leaf': 10, 'classifier__min_samples_split': 2, 'classifier__n_estimators': 200}	86	standard	lle	extra_trees	0.00195418
0.712542	0.0470004	0.379789	0.010068	0.382194	0.0173138	{'classifier__max_depth': None, 'classifier__min_samples_leaf': 10, 'classifier__min_samples_split': 2, 'classifier__n_estimators': 300}	77	standard	lle	extra_trees	0.00240579
1009328485	0.064	0.379789	0.010068	0.38182	0.0161912	{'classifier__max_depth': None, 'classifier__min_samples_leaf': 10, 'classifier__min_samples_split': 2, 'classifier__n_estimators': 500}	77	standard	lle	extra_trees	0.00203154
0.4157	0.0325003	0.379789	0.010068	0.382045	0.0168648	{'classifier__max_depth': None, 'classifier__min_samples_leaf': 10, 'classifier__min_samples_split': 10, 'classifier__n_estimators': 100}	77	standard	lle	extra_trees	0.00225609
0.583018	0.0385178	0.378446	0.00617235	0.380323	0.0117007	{'classifier__max_depth': None, 'classifier__min_samples_leaf': 10, 'classifier__min_samples_split': 10, 'classifier__n_estimators': 200}	99	standard	lle	extra_trees	0.00187682
0.727678	0.047	0.379789	0.010068	0.381221	0.0143949	{'classifier__max_depth': None, 'classifier__min_samples_leaf': 10, 'classifier__min_samples_split': 10, 'classifier__n_estimators': 300}	77	standard	lle	extra_trees	0.00143274
1030843854	0.0665	0.378446	0.00617235	0.380697	0.0128233	{'classifier__max_depth': None, 'classifier__min_samples_leaf': 10, 'classifier__min_samples_split': 10, 'classifier__n_estimators': 500}	99	standard	lle	extra_trees	0.00225107
0.422201	0.0313993	0.378446	0.00617235	0.380772	0.0130478	{'classifier__max_depth': None, 'classifier__min_samples_leaf': 10, 'classifier__min_samples_split': 20, 'classifier__n_estimators': 100}	99	standard	lle	extra_trees	0.00232592
0.58728	0.0419174	0.378446	0.00617235	0.380099	0.0110272	{'classifier__max_depth': None, 'classifier__min_samples_leaf': 10, 'classifier__min_samples_split': 20, 'classifier__n_estimators': 200}	99	standard	lle	extra_trees	0.00165227
0.739128	0.0480192	0.378446	0.00617235	0.380248	0.0114762	{'classifier__max_depth': None, 'classifier__min_samples_leaf': 10, 'classifier__min_samples_split': 20, 'classifier__n_estimators': 300}	99	standard	lle	extra_trees	0.00180197
1029778147	0.0636184	0.379118	0.00810417	0.380623	0.0125988	{'classifier__max_depth': None, 'classifier__min_samples_leaf': 10, 'classifier__min_samples_split': 20, 'classifier__n_estimators': 500}	86	standard	lle	extra_trees	0.00150508
0.415882	0.0328999	0.391919	0.024192	0.398805	0.03505	{'classifier__max_depth': 10, 'classifier__min_samples_leaf': 5, 'classifier__min_samples_split': 2, 'classifier__n_estimators': 100}	40	standard	lle	extra_trees	0.00688587
0.576294	0.0432218	0.389883	0.0216544	0.395365	0.0333738	{'classifier__max_depth': 10, 'classifier__min_samples_leaf': 5, 'classifier__min_samples_split': 2, 'classifier__n_estimators': 200}	47	standard	lle	extra_trees	0.00548188
0.709757	0.0485998	0.390572	0.0240589	0.399928	0.0374072	{'classifier__max_depth': 10, 'classifier__min_samples_leaf': 5, 'classifier__min_samples_split': 2, 'classifier__n_estimators': 300}	44	standard	lle	extra_trees	0.00935572
1028166914	0.0669178	0.387198	0.0215648	0.394467	0.0372123	{'classifier__max_depth': 10, 'classifier__min_samples_leaf': 5, 'classifier__min_samples_split': 2, 'classifier__n_estimators': 500}	57	standard	lle	extra_trees	0.00726829
0.410199	0.0334002	0.387865	0.0224505	0.398656	0.0407755	{'classifier__max_depth': 10, 'classifier__min_samples_leaf': 5, 'classifier__min_samples_split': 10, 'classifier__n_estimators': 100}	54	standard	lle	extra_trees	0.0107911
0.575843	0.0405182	0.389221	0.0215149	0.395288	0.0360613	{'classifier__max_depth': 10, 'classifier__min_samples_leaf': 5, 'classifier__min_samples_split': 10, 'classifier__n_estimators': 200}	49	standard	lle	extra_trees	0.00606714
0.74188	0.0485996	0.384496	0.0177416	0.392821	0.0345567	{'classifier__max_depth': 10, 'classifier__min_samples_leaf': 5, 'classifier__min_samples_split': 10, 'classifier__n_estimators': 300}	67	standard	lle	extra_trees	0.00832524
1021977377	0.068234	0.383825	0.0179285	0.392223	0.0367589	{'classifier__max_depth': 10, 'classifier__min_samples_leaf': 5, 'classifier__min_samples_split': 10, 'classifier__n_estimators': 500}	70	standard	lle	extra_trees	0.00839836
0.413396	0.0327996	0.382473	0.0141093	0.389904	0.0339134	{'classifier__max_depth': 10, 'classifier__min_samples_leaf': 5, 'classifier__min_samples_split': 20, 'classifier__n_estimators': 100}	73	standard	lle	extra_trees	0.00743064
0.560358	0.0393998	0.383829	0.0161837	0.389005	0.030746	{'classifier__max_depth': 10, 'classifier__min_samples_leaf': 5, 'classifier__min_samples_split': 20, 'classifier__n_estimators': 200}	69	standard	lle	extra_trees	0.00517543
0.731995	0.0499	0.387861	0.0188716	0.392971	0.0332588	{'classifier__max_depth': 10, 'classifier__min_samples_leaf': 5, 'classifier__min_samples_split': 20, 'classifier__n_estimators': 300}	55	standard	lle	extra_trees	0.00511039
1044077659	0.0662407	0.384496	0.0177416	0.392146	0.0281573	{'classifier__max_depth': 10, 'classifier__min_samples_leaf': 5, 'classifier__min_samples_split': 20, 'classifier__n_estimators': 500}	67	standard	lle	extra_trees	0.00765036
0.416316	0.0321055	0.379118	0.00810417	0.381147	0.0141704	{'classifier__max_depth': 10, 'classifier__min_samples_leaf': 10, 'classifier__min_samples_split': 2, 'classifier__n_estimators': 100}	86	standard	lle	extra_trees	0.00202903
0.563182	0.0402164	0.379118	0.00810417	0.381745	0.0159666	{'classifier__max_depth': 10, 'classifier__min_samples_leaf': 10, 'classifier__min_samples_split': 2, 'classifier__n_estimators': 200}	86	standard	lle	extra_trees	0.00262783
0.716378	0.0489317	0.380464	0.0101768	0.381894	0.0138777	{'classifier__max_depth': 10, 'classifier__min_samples_leaf': 10, 'classifier__min_samples_split': 2, 'classifier__n_estimators': 300}	75	standard	lle	extra_trees	0.0014301
1021108747	0.0689997	0.379118	0.00810417	0.381745	0.0159666	{'classifier__max_depth': 10, 'classifier__min_samples_leaf': 10, 'classifier__min_samples_split': 2, 'classifier__n_estimators': 500}	86	standard	lle	extra_trees	0.00262783
0.419264	0.0352994	0.379118	0.00810417	0.381596	0.0155176	{'classifier__max_depth': 10, 'classifier__min_samples_leaf': 10, 'classifier__min_samples_split': 10, 'classifier__n_estimators': 100}	86	standard	lle	extra_trees	0.00247813
0.579021	0.0417412	0.379122	0.00648959	0.38167	0.0122603	{'classifier__max_depth': 10, 'classifier__min_samples_leaf': 10, 'classifier__min_samples_split': 10, 'classifier__n_estimators': 200}	84	standard	lle	extra_trees	0.00254755
0.729045	0.0494	0.378446	0.00617235	0.380473	0.0121498	{'classifier__max_depth': 10, 'classifier__min_samples_leaf': 10, 'classifier__min_samples_split': 10, 'classifier__n_estimators': 300}	99	standard	lle	extra_trees	0.00202652
1023098636	0.0688999	0.379118	0.00810417	0.380623	0.0125988	{'classifier__max_depth': 10, 'classifier__min_samples_leaf': 10, 'classifier__min_samples_split': 10, 'classifier__n_estimators': 500}	86	standard	lle	extra_trees	0.00150508
0.416554	0.0351007	0.379118	0.00810417	0.382119	0.0158763	{'classifier__max_depth': 10, 'classifier__min_samples_leaf': 10, 'classifier__min_samples_split': 20, 'classifier__n_estimators': 100}	86	standard	lle	extra_trees	0.0030018
0.585516	0.0436186	0.378446	0.00617235	0.380922	0.0134969	{'classifier__max_depth': 10, 'classifier__min_samples_leaf': 10, 'classifier__min_samples_split': 20, 'classifier__n_estimators': 200}	99	standard	lle	extra_trees	0.00247562
0.726671	0.0481997	0.378446	0.00617235	0.380248	0.0114762	{'classifier__max_depth': 10, 'classifier__min_samples_leaf': 10, 'classifier__min_samples_split': 20, 'classifier__n_estimators': 300}	99	standard	lle	extra_trees	0.00180197
1012338448	0.0647999	0.379118	0.00810417	0.381296	0.0146195	{'classifier__max_depth': 10, 'classifier__min_samples_leaf': 10, 'classifier__min_samples_split': 20, 'classifier__n_estimators': 500}	86	standard	lle	extra_trees	0.00217873
0.415266	0.0308996	0.385856	0.014016	0.396933	0.0272523	{'classifier__max_depth': 20, 'classifier__min_samples_leaf': 5, 'classifier__min_samples_split': 2, 'classifier__n_estimators': 100}	63	standard	lle	extra_trees	0.0110769
0.567613	0.0396338	0.383167	0.0125712	0.389677	0.0255846	{'classifier__max_depth': 20, 'classifier__min_samples_leaf': 5, 'classifier__min_samples_split': 2, 'classifier__n_estimators': 200}	72	standard	lle	extra_trees	0.00651004
0.726368	0.0509	0.38855	0.0201198	0.396337	0.0358142	{'classifier__max_depth': 20, 'classifier__min_samples_leaf': 5, 'classifier__min_samples_split': 2, 'classifier__n_estimators': 300}	50	standard	lle	extra_trees	0.00778686
1040555573	0.0646001	0.387194	0.0156432	0.397684	0.0322023	{'classifier__max_depth': 20, 'classifier__min_samples_leaf': 5, 'classifier__min_samples_split': 2, 'classifier__n_estimators': 500}	58	standard	lle	extra_trees	0.0104898
0.411468	0.0315001	0.385852	0.0141974	0.388255	0.0182687	{'classifier__max_depth': 20, 'classifier__min_samples_leaf': 5, 'classifier__min_samples_split': 10, 'classifier__n_estimators': 100}	65	standard	lle	extra_trees	0.00240315
0.565199	0.0416002	0.389892	0.0220647	0.401275	0.0378878	{'classifier__max_depth': 20, 'classifier__min_samples_leaf': 5, 'classifier__min_samples_split': 10, 'classifier__n_estimators': 200}	46	standard	lle	extra_trees	0.0113828
0.733788	0.0477355	0.385856	0.0163865	0.394389	0.0282983	{'classifier__max_depth': 20, 'classifier__min_samples_leaf': 5, 'classifier__min_samples_split': 10, 'classifier__n_estimators': 300}	63	standard	lle	extra_trees	0.00853315
1033979464	0.0713009	0.391243	0.0241065	0.399105	0.0363661	{'classifier__max_depth': 20, 'classifier__min_samples_leaf': 5, 'classifier__min_samples_split': 10, 'classifier__n_estimators': 500}	42	standard	lle	extra_trees	0.00786151
0.418854	0.0310995	0.393937	0.0225003	0.402247	0.0354429	{'classifier__max_depth': 20, 'classifier__min_samples_leaf': 5, 'classifier__min_samples_split': 20, 'classifier__n_estimators': 100}	39	standard	lle	extra_trees	0.00831024
0.568171	0.0400998	0.391915	0.0202336	0.403147	0.0370011	{'classifier__max_depth': 20, 'classifier__min_samples_leaf': 5, 'classifier__min_samples_split': 20, 'classifier__n_estimators': 200}	41	standard	lle	extra_trees	0.0112322
0.722709	0.0482002	0.390568	0.0245084	0.399329	0.0377054	{'classifier__max_depth': 20, 'classifier__min_samples_leaf': 5, 'classifier__min_samples_split': 20, 'classifier__n_estimators': 300}	45	standard	lle	extra_trees	0.00876117
1031774139	0.065101	0.386527	0.0198559	0.393568	0.0332248	{'classifier__max_depth': 20, 'classifier__min_samples_leaf': 5, 'classifier__min_samples_split': 20, 'classifier__n_estimators': 500}	59	standard	lle	extra_trees	0.00704089
0.4069	0.0303004	0.381135	0.0121019	0.383841	0.0198765	{'classifier__max_depth': 20, 'classifier__min_samples_leaf': 10, 'classifier__min_samples_split': 2, 'classifier__n_estimators': 100}	74	standard	lle	extra_trees	0.00270512
0.564133	0.0415	0.379789	0.010068	0.381072	0.0139459	{'classifier__max_depth': 20, 'classifier__min_samples_leaf': 10, 'classifier__min_samples_split': 2, 'classifier__n_estimators': 200}	77	standard	lle	extra_trees	0.00128304
0.720972	0.0485	0.379789	0.010068	0.381446	0.0150685	{'classifier__max_depth': 20, 'classifier__min_samples_leaf': 10, 'classifier__min_samples_split': 2, 'classifier__n_estimators': 300}	77	standard	lle	extra_trees	0.00165729
1013238716	0.0626003	0.379789	0.010068	0.381147	0.0141704	{'classifier__max_depth': 20, 'classifier__min_samples_leaf': 10, 'classifier__min_samples_split': 2, 'classifier__n_estimators': 500}	77	standard	lle	extra_trees	0.00135789
0.409699	0.0333999	0.383816	0.0220398	0.385937	0.0285408	{'classifier__max_depth': 20, 'classifier__min_samples_leaf': 10, 'classifier__min_samples_split': 10, 'classifier__n_estimators': 100}	71	standard	lle	extra_trees	0.00212146
0.560631	0.0412004	0.379118	0.00810417	0.381446	0.0150685	{'classifier__max_depth': 20, 'classifier__min_samples_leaf': 10, 'classifier__min_samples_split': 10, 'classifier__n_estimators': 200}	86	standard	lle	extra_trees	0.00232843
0.711388	0.0469001	0.379118	0.00810417	0.38182	0.0161912	{'classifier__max_depth': 20, 'classifier__min_samples_leaf': 10, 'classifier__min_samples_split': 10, 'classifier__n_estimators': 300}	86	standard	lle	extra_trees	0.00270268
10085783	0.0645006	0.379118	0.00810417	0.38182	0.0161912	{'classifier__max_depth': 20, 'classifier__min_samples_leaf': 10, 'classifier__min_samples_split': 10, 'classifier__n_estimators': 500}	86	standard	lle	extra_trees	0.00270268
0.412708	0.033117	0.379122	0.00648959	0.381071	0.0114525	{'classifier__max_depth': 20, 'classifier__min_samples_leaf': 10, 'classifier__min_samples_split': 20, 'classifier__n_estimators': 100}	84	standard	lle	extra_trees	0.00194903
0.560656	0.0406002	0.379118	0.00810417	0.382569	0.0184365	{'classifier__max_depth': 20, 'classifier__min_samples_leaf': 10, 'classifier__min_samples_split': 20, 'classifier__n_estimators': 200}	86	standard	lle	extra_trees	0.00345119
0.707048	0.0424006	0.378446	0.00617235	0.380623	0.0125988	{'classifier__max_depth': 20, 'classifier__min_samples_leaf': 10, 'classifier__min_samples_split': 20, 'classifier__n_estimators': 300}	99	standard	lle	extra_trees	0.00217622
0.855898	0.0357994	0.379793	0.00829383	0.382194	0.0151925	{'classifier__max_depth': 20, 'classifier__min_samples_leaf': 10, 'classifier__min_samples_split': 20, 'classifier__n_estimators': 500}	76	standard	lle	extra_trees	0.00240075
5087248421	0.025	0.455219	0.0242963	0.467715	0.0229979	{'classifier__alpha': 0.0001, 'classifier__hidden_layer_sizes': (50,)}	7	standard	lle	mlp	0.0124951
6275656199	0.0278997	0.469359	0.0332341	0.483054	0.0228388	{'classifier__alpha': 0.0001, 'classifier__hidden_layer_sizes': (100,)}	5	standard	lle	mlp	0.0136948
6333939695	0.0271195	0.494277	0.0345006	0.508866	0.0262602	{'classifier__alpha': 0.0001, 'classifier__hidden_layer_sizes': (50, 50)}	1	standard	lle	mlp	0.0145884
5139816284	0.0279	0.454553	0.0299565	0.470858	0.02413	{'classifier__alpha': 0.001, 'classifier__hidden_layer_sizes': (50,)}	8	standard	lle	mlp	0.0163047
6325018239	0.0255004	0.474075	0.0304595	0.485372	0.024434	{'classifier__alpha': 0.001, 'classifier__hidden_layer_sizes': (100,)}	4	standard	lle	mlp	0.0112973
6262785435	0.0240995	0.492246	0.0338002	0.511559	0.0254806	{'classifier__alpha': 0.001, 'classifier__hidden_layer_sizes': (50, 50)}	2	standard	lle	mlp	0.0193134
5143298244	0.0251999	0.450508	0.0302327	0.465095	0.022431	{'classifier__alpha': 0.01, 'classifier__hidden_layer_sizes': (50,)}	9	standard	lle	mlp	0.0145872
5579910851	0.0182996	0.460602	0.0300701	0.476244	0.0242939	{'classifier__alpha': 0.01, 'classifier__hidden_layer_sizes': (100,)}	6	standard	lle	mlp	0.0156421
4451031852	0.0153001	0.487543	0.0314722	0.505873	0.0227769	{'classifier__alpha': 0.01, 'classifier__hidden_layer_sizes': (50, 50)}	3	standard	lle	mlp	0.0183297
0.531721	0.0271163	0.376433	0.0020013	0.376431	0.000221608	{'classifier__C': 0.1, 'classifier__gamma': 'scale'}	3	standard	modified_lle	svm_linear	-1.976e-06
0.547622	0.0286344	0.376433	0.0020013	0.376431	0.000221608	{'classifier__C': 0.1, 'classifier__gamma': 'auto'}	3	standard	modified_lle	svm_linear	-1.976e-06
0.528566	0.0275005	0.376433	0.0020013	0.37673	0.000527387	{'classifier__C': 1, 'classifier__gamma': 'scale'}	3	standard	modified_lle	svm_linear	0.000297201
0.559062	0.0281979	0.376433	0.0020013	0.376581	0.000431278	{'classifier__C': 1, 'classifier__gamma': 'auto'}	3	standard	modified_lle	svm_linear	0.000147613
279639256	0.00550113	0.595973	0.0222617	0.614889	0.00536532	{'classifier__alpha': 0.01, 'classifier__hidden_layer_sizes': (50,)}	1	normalizer	lda	mlp	0.018916
3283535171	0.053099	0.577086	0.0191135	0.603814	0.0107036	{'classifier__alpha': 0.001, 'classifier__hidden_layer_sizes': (50, 50)}	1	quantile-normal	isomap	mlp	0.0267284
0.589478	0.043201	0.376433	0.0020013	0.376581	0.00034105	{'classifier__C': 0.1, 'classifier__gamma': 'scale'}	4	standard	modified_lle	svm_rbf	0.000147669
0.592977	0.0443018	0.376433	0.0020013	0.376431	0.000221608	{'classifier__C': 0.1, 'classifier__gamma': 'auto'}	4	standard	modified_lle	svm_rbf	-1.976e-06
0.578114	0.0453019	0.390568	0.0101846	0.407784	0.0164089	{'classifier__C': 1, 'classifier__gamma': 'scale'}	2	standard	modified_lle	svm_rbf	0.0172162
0.604549	0.0508999	0.376433	0.0020013	0.376431	0.000221608	{'classifier__C': 1, 'classifier__gamma': 'auto'}	4	standard	modified_lle	svm_rbf	-1.976e-06
0.578024	0.0414005	0.433689	0.0301123	0.450356	0.0218195	{'classifier__C': 10, 'classifier__gamma': 'scale'}	1	standard	modified_lle	svm_rbf	0.0166672
0.409253	0.027902	0.379131	0.00358945	0.379948	0.000331329	{'classifier__C': 10, 'classifier__gamma': 'auto'}	3	standard	modified_lle	svm_rbf	0.000816533
0.59519	0.0307009	0.376433	0.0020013	0.377479	0.00132247	{'classifier__C': 0.1, 'classifier__gamma': 'scale'}	4	standard	modified_lle	svm_sigmoid	0.00104559
0.599287	0.0316016	0.376433	0.0020013	0.376431	0.000221608	{'classifier__C': 0.1, 'classifier__gamma': 'auto'}	4	standard	modified_lle	svm_sigmoid	-1.976e-06
0.58827	0.0291011	0.386532	0.00738858	0.3893	0.00901437	{'classifier__C': 1, 'classifier__gamma': 'scale'}	2	standard	modified_lle	svm_sigmoid	0.00276855
0.601659	0.0301995	0.376433	0.0020013	0.376431	0.000221608	{'classifier__C': 1, 'classifier__gamma': 'auto'}	4	standard	modified_lle	svm_sigmoid	-1.976e-06
0.577327	0.0264019	0.397325	0.030039	0.399102	0.0267088	{'classifier__C': 10, 'classifier__gamma': 'scale'}	1	standard	modified_lle	svm_sigmoid	0.00177729
0.408103	0.0204994	0.378455	0.00297985	0.379948	0.000331329	{'classifier__C': 10, 'classifier__gamma': 'auto'}	3	standard	modified_lle	svm_sigmoid	0.00149221
0.504465	0.0223993	0.376433	0.0020013	0.376431	0.000221608	{'classifier__C': 0.1, 'classifier__penalty': 'l1', 'classifier__solver': 'liblinear'}	4	standard	modified_lle	logistic_regression	-1.976e-06
0.519164	0.0244984	0.376433	0.0020013	0.376431	0.000221608	{'classifier__C': 0.1, 'classifier__penalty': 'l2', 'classifier__solver': 'liblinear'}	4	standard	modified_lle	logistic_regression	-1.976e-06
0.519169	0.026702	0.378455	0.00297985	0.377927	0.000888907	{'classifier__C': 1, 'classifier__penalty': 'l1', 'classifier__solver': 'liblinear'}	2	standard	modified_lle	logistic_regression	-0.000528078
0.542678	0.0279987	0.376433	0.0020013	0.376431	0.000221608	{'classifier__C': 1, 'classifier__penalty': 'l2', 'classifier__solver': 'liblinear'}	4	standard	modified_lle	logistic_regression	-1.976e-06
4528527188	0.0228984	0.574401	0.0238452	0.597381	0.00820744	{'classifier__alpha': 0.001, 'classifier__hidden_layer_sizes': (50, 50)}	1	quantile-uniform	isomap	mlp	0.0229796
0.380987	0.0165999	0.378455	0.00297985	0.379798	0.000473384	{'classifier__C': 10, 'classifier__penalty': 'l2', 'classifier__solver': 'liblinear'}	3	standard	modified_lle	logistic_regression	0.00134251
6186029601	0.058601	0.593978	0.0239846	0.596856	0.0142032	{'classifier__alpha': 0.001, 'classifier__hidden_layer_sizes': (50, 50)}	1	quantile-normal	lle	mlp	0.00287842
1094462371	0.0380166	0.575073	0.0219549	0.595284	0.00730367	{'classifier__C': 10, 'classifier__gamma': 'scale'}	1	yeo-johnson	isomap	svm_rbf	0.0202115
0.636717	0.0317999	0.376433	0.0020013	0.376431	0.000221608	{'classifier__max_depth': None, 'classifier__min_samples_leaf': 5, 'classifier__min_samples_split': 2, 'classifier__n_estimators': 100}	37	standard	modified_lle	extra_trees	-1.976e-06
0.79205	0.0425002	0.376433	0.0020013	0.376431	0.000221608	{'classifier__max_depth': None, 'classifier__min_samples_leaf': 5, 'classifier__min_samples_split': 2, 'classifier__n_estimators': 200}	37	standard	modified_lle	extra_trees	-1.976e-06
0.953258	0.0475002	0.376433	0.0020013	0.376431	0.000221608	{'classifier__max_depth': None, 'classifier__min_samples_leaf': 5, 'classifier__min_samples_split': 2, 'classifier__n_estimators': 300}	37	standard	modified_lle	extra_trees	-1.976e-06
1288959789	0.0690003	0.376433	0.0020013	0.376431	0.000221608	{'classifier__max_depth': None, 'classifier__min_samples_leaf': 5, 'classifier__min_samples_split': 2, 'classifier__n_estimators': 500}	37	standard	modified_lle	extra_trees	-1.976e-06
0.653032	0.0291008	0.376433	0.0020013	0.376431	0.000221608	{'classifier__max_depth': None, 'classifier__min_samples_leaf': 5, 'classifier__min_samples_split': 10, 'classifier__n_estimators': 100}	37	standard	modified_lle	extra_trees	-1.976e-06
0.793266	0.0408164	0.376433	0.0020013	0.376431	0.000221608	{'classifier__max_depth': None, 'classifier__min_samples_leaf': 5, 'classifier__min_samples_split': 10, 'classifier__n_estimators': 200}	37	standard	modified_lle	extra_trees	-1.976e-06
0.950165	0.0489997	0.376433	0.0020013	0.376431	0.000221608	{'classifier__max_depth': None, 'classifier__min_samples_leaf': 5, 'classifier__min_samples_split': 10, 'classifier__n_estimators': 300}	37	standard	modified_lle	extra_trees	-1.976e-06
123965857	0.0640614	0.376433	0.0020013	0.376431	0.000221608	{'classifier__max_depth': None, 'classifier__min_samples_leaf': 5, 'classifier__min_samples_split': 10, 'classifier__n_estimators': 500}	37	standard	modified_lle	extra_trees	-1.976e-06
0.634087	0.0349998	0.376433	0.0020013	0.376431	0.000221608	{'classifier__max_depth': None, 'classifier__min_samples_leaf': 5, 'classifier__min_samples_split': 20, 'classifier__n_estimators': 100}	37	standard	modified_lle	extra_trees	-1.976e-06
0.787245	0.0416199	0.376433	0.0020013	0.376431	0.000221608	{'classifier__max_depth': None, 'classifier__min_samples_leaf': 5, 'classifier__min_samples_split': 20, 'classifier__n_estimators': 200}	37	standard	modified_lle	extra_trees	-1.976e-06
0.925653	0.0482163	0.376433	0.0020013	0.376431	0.000221608	{'classifier__max_depth': None, 'classifier__min_samples_leaf': 5, 'classifier__min_samples_split': 20, 'classifier__n_estimators': 300}	37	standard	modified_lle	extra_trees	-1.976e-06
1217311788	0.0659996	0.376433	0.0020013	0.376431	0.000221608	{'classifier__max_depth': None, 'classifier__min_samples_leaf': 5, 'classifier__min_samples_split': 20, 'classifier__n_estimators': 500}	37	standard	modified_lle	extra_trees	-1.976e-06
0.631346	0.0336999	0.376433	0.0020013	0.376431	0.000221608	{'classifier__max_depth': None, 'classifier__min_samples_leaf': 10, 'classifier__min_samples_split': 2, 'classifier__n_estimators': 100}	37	standard	modified_lle	extra_trees	-1.976e-06
0.7844	0.0386335	0.376433	0.0020013	0.376431	0.000221608	{'classifier__max_depth': None, 'classifier__min_samples_leaf': 10, 'classifier__min_samples_split': 2, 'classifier__n_estimators': 200}	37	standard	modified_lle	extra_trees	-1.976e-06
0.931434	0.0485338	0.376433	0.0020013	0.376431	0.000221608	{'classifier__max_depth': None, 'classifier__min_samples_leaf': 10, 'classifier__min_samples_split': 2, 'classifier__n_estimators': 300}	37	standard	modified_lle	extra_trees	-1.976e-06
1219873476	0.0629997	0.376433	0.0020013	0.376431	0.000221608	{'classifier__max_depth': None, 'classifier__min_samples_leaf': 10, 'classifier__min_samples_split': 2, 'classifier__n_estimators': 500}	37	standard	modified_lle	extra_trees	-1.976e-06
0.627173	0.0351997	0.376433	0.0020013	0.376431	0.000221608	{'classifier__max_depth': None, 'classifier__min_samples_leaf': 10, 'classifier__min_samples_split': 10, 'classifier__n_estimators': 100}	37	standard	modified_lle	extra_trees	-1.976e-06
0.809673	0.0392004	0.376433	0.0020013	0.376431	0.000221608	{'classifier__max_depth': None, 'classifier__min_samples_leaf': 10, 'classifier__min_samples_split': 10, 'classifier__n_estimators': 200}	37	standard	modified_lle	extra_trees	-1.976e-06
0.952479	0.0506332	0.376433	0.0020013	0.376431	0.000221608	{'classifier__max_depth': None, 'classifier__min_samples_leaf': 10, 'classifier__min_samples_split': 10, 'classifier__n_estimators': 300}	37	standard	modified_lle	extra_trees	-1.976e-06
1224784732	0.0642151	0.376433	0.0020013	0.376431	0.000221608	{'classifier__max_depth': None, 'classifier__min_samples_leaf': 10, 'classifier__min_samples_split': 10, 'classifier__n_estimators': 500}	37	standard	modified_lle	extra_trees	-1.976e-06
0.63749	0.0319	0.376433	0.0020013	0.376431	0.000221608	{'classifier__max_depth': None, 'classifier__min_samples_leaf': 10, 'classifier__min_samples_split': 20, 'classifier__n_estimators': 100}	37	standard	modified_lle	extra_trees	-1.976e-06
0.805578	0.0394004	0.376433	0.0020013	0.376431	0.000221608	{'classifier__max_depth': None, 'classifier__min_samples_leaf': 10, 'classifier__min_samples_split': 20, 'classifier__n_estimators': 200}	37	standard	modified_lle	extra_trees	-1.976e-06
0.928593	0.0448993	0.376433	0.0020013	0.376431	0.000221608	{'classifier__max_depth': None, 'classifier__min_samples_leaf': 10, 'classifier__min_samples_split': 20, 'classifier__n_estimators': 300}	37	standard	modified_lle	extra_trees	-1.976e-06
1224210954	0.0641168	0.376433	0.0020013	0.376431	0.000221608	{'classifier__max_depth': None, 'classifier__min_samples_leaf': 10, 'classifier__min_samples_split': 20, 'classifier__n_estimators': 500}	37	standard	modified_lle	extra_trees	-1.976e-06
0.646662	0.0337997	0.410067	0.0135263	0.438089	0.0152677	{'classifier__max_depth': 10, 'classifier__min_samples_leaf': 1, 'classifier__min_samples_split': 20, 'classifier__n_estimators': 100}	30	standard	modified_lle	extra_trees	0.028022
0.820519	0.0433177	0.410067	0.0124727	0.439811	0.0186434	{'classifier__max_depth': 10, 'classifier__min_samples_leaf': 1, 'classifier__min_samples_split': 20, 'classifier__n_estimators': 200}	31	standard	modified_lle	extra_trees	0.029744
1330287313	0.0681	0.406036	0.0111086	0.435621	0.0174517	{'classifier__max_depth': 10, 'classifier__min_samples_leaf': 1, 'classifier__min_samples_split': 20, 'classifier__n_estimators': 500}	35	standard	modified_lle	extra_trees	0.0295851
0.631382	0.0333001	0.376433	0.0020013	0.376431	0.000221608	{'classifier__max_depth': 10, 'classifier__min_samples_leaf': 5, 'classifier__min_samples_split': 2, 'classifier__n_estimators': 100}	37	standard	modified_lle	extra_trees	-1.976e-06
0.782617	0.0400171	0.376433	0.0020013	0.376431	0.000221608	{'classifier__max_depth': 10, 'classifier__min_samples_leaf': 5, 'classifier__min_samples_split': 2, 'classifier__n_estimators': 200}	37	standard	modified_lle	extra_trees	-1.976e-06
0.936968	0.0490999	0.376433	0.0020013	0.376431	0.000221608	{'classifier__max_depth': 10, 'classifier__min_samples_leaf': 5, 'classifier__min_samples_split': 2, 'classifier__n_estimators': 300}	37	standard	modified_lle	extra_trees	-1.976e-06
1210553932	0.063718	0.376433	0.0020013	0.376431	0.000221608	{'classifier__max_depth': 10, 'classifier__min_samples_leaf': 5, 'classifier__min_samples_split': 2, 'classifier__n_estimators': 500}	37	standard	modified_lle	extra_trees	-1.976e-06
0.636792	0.031119	0.376433	0.0020013	0.376431	0.000221608	{'classifier__max_depth': 10, 'classifier__min_samples_leaf': 5, 'classifier__min_samples_split': 10, 'classifier__n_estimators': 100}	37	standard	modified_lle	extra_trees	-1.976e-06
0.791203	0.0444999	0.376433	0.0020013	0.376431	0.000221608	{'classifier__max_depth': 10, 'classifier__min_samples_leaf': 5, 'classifier__min_samples_split': 10, 'classifier__n_estimators': 200}	37	standard	modified_lle	extra_trees	-1.976e-06
0.935689	0.0483995	0.376433	0.0020013	0.376431	0.000221608	{'classifier__max_depth': 10, 'classifier__min_samples_leaf': 5, 'classifier__min_samples_split': 10, 'classifier__n_estimators': 300}	37	standard	modified_lle	extra_trees	-1.976e-06
1213212252	0.063	0.376433	0.0020013	0.376431	0.000221608	{'classifier__max_depth': 10, 'classifier__min_samples_leaf': 5, 'classifier__min_samples_split': 10, 'classifier__n_estimators': 500}	37	standard	modified_lle	extra_trees	-1.976e-06
0.637446	0.0320001	0.376433	0.0020013	0.376431	0.000221608	{'classifier__max_depth': 10, 'classifier__min_samples_leaf': 5, 'classifier__min_samples_split': 20, 'classifier__n_estimators': 100}	37	standard	modified_lle	extra_trees	-1.976e-06
0.78287	0.0414994	0.376433	0.0020013	0.376431	0.000221608	{'classifier__max_depth': 10, 'classifier__min_samples_leaf': 5, 'classifier__min_samples_split': 20, 'classifier__n_estimators': 200}	37	standard	modified_lle	extra_trees	-1.976e-06
0.944898	0.0492994	0.376433	0.0020013	0.376431	0.000221608	{'classifier__max_depth': 10, 'classifier__min_samples_leaf': 5, 'classifier__min_samples_split': 20, 'classifier__n_estimators': 300}	37	standard	modified_lle	extra_trees	-1.976e-06
1233227992	0.0626006	0.376433	0.0020013	0.376431	0.000221608	{'classifier__max_depth': 10, 'classifier__min_samples_leaf': 5, 'classifier__min_samples_split': 20, 'classifier__n_estimators': 500}	37	standard	modified_lle	extra_trees	-1.976e-06
0.6431	0.0325999	0.376433	0.0020013	0.376431	0.000221608	{'classifier__max_depth': 10, 'classifier__min_samples_leaf': 10, 'classifier__min_samples_split': 2, 'classifier__n_estimators': 100}	37	standard	modified_lle	extra_trees	-1.976e-06
0.799763	0.0420997	0.376433	0.0020013	0.376431	0.000221608	{'classifier__max_depth': 10, 'classifier__min_samples_leaf': 10, 'classifier__min_samples_split': 2, 'classifier__n_estimators': 200}	37	standard	modified_lle	extra_trees	-1.976e-06
0.942829	0.0484	0.376433	0.0020013	0.376431	0.000221608	{'classifier__max_depth': 10, 'classifier__min_samples_leaf': 10, 'classifier__min_samples_split': 2, 'classifier__n_estimators': 300}	37	standard	modified_lle	extra_trees	-1.976e-06
12253474	0.0642164	0.376433	0.0020013	0.376431	0.000221608	{'classifier__max_depth': 10, 'classifier__min_samples_leaf': 10, 'classifier__min_samples_split': 2, 'classifier__n_estimators': 500}	37	standard	modified_lle	extra_trees	-1.976e-06
0.631842	0.0336225	0.376433	0.0020013	0.376431	0.000221608	{'classifier__max_depth': 10, 'classifier__min_samples_leaf': 10, 'classifier__min_samples_split': 10, 'classifier__n_estimators': 100}	37	standard	modified_lle	extra_trees	-1.976e-06
0.778583	0.0425004	0.376433	0.0020013	0.376431	0.000221608	{'classifier__max_depth': 10, 'classifier__min_samples_leaf': 10, 'classifier__min_samples_split': 10, 'classifier__n_estimators': 200}	37	standard	modified_lle	extra_trees	-1.976e-06
0.933024	0.0490364	0.376433	0.0020013	0.376431	0.000221608	{'classifier__max_depth': 10, 'classifier__min_samples_leaf': 10, 'classifier__min_samples_split': 10, 'classifier__n_estimators': 300}	37	standard	modified_lle	extra_trees	-1.976e-06
1237131	0.0647003	0.376433	0.0020013	0.376431	0.000221608	{'classifier__max_depth': 10, 'classifier__min_samples_leaf': 10, 'classifier__min_samples_split': 10, 'classifier__n_estimators': 500}	37	standard	modified_lle	extra_trees	-1.976e-06
0.640306	0.0334005	0.376433	0.0020013	0.376431	0.000221608	{'classifier__max_depth': 10, 'classifier__min_samples_leaf': 10, 'classifier__min_samples_split': 20, 'classifier__n_estimators': 100}	37	standard	modified_lle	extra_trees	-1.976e-06
0.797016	0.0409002	0.376433	0.0020013	0.376431	0.000221608	{'classifier__max_depth': 10, 'classifier__min_samples_leaf': 10, 'classifier__min_samples_split': 20, 'classifier__n_estimators': 200}	37	standard	modified_lle	extra_trees	-1.976e-06
0.946395	0.0498997	0.376433	0.0020013	0.376431	0.000221608	{'classifier__max_depth': 10, 'classifier__min_samples_leaf': 10, 'classifier__min_samples_split': 20, 'classifier__n_estimators': 300}	37	standard	modified_lle	extra_trees	-1.976e-06
1215673828	0.0620715	0.376433	0.0020013	0.376431	0.000221608	{'classifier__max_depth': 10, 'classifier__min_samples_leaf': 10, 'classifier__min_samples_split': 20, 'classifier__n_estimators': 500}	37	standard	modified_lle	extra_trees	-1.976e-06
0.642735	0.0325007	0.376433	0.0020013	0.376431	0.000221608	{'classifier__max_depth': 20, 'classifier__min_samples_leaf': 5, 'classifier__min_samples_split': 2, 'classifier__n_estimators': 100}	37	standard	modified_lle	extra_trees	-1.976e-06
0.764001	0.04	0.376433	0.0020013	0.376431	0.000221608	{'classifier__max_depth': 20, 'classifier__min_samples_leaf': 5, 'classifier__min_samples_split': 2, 'classifier__n_estimators': 200}	37	standard	modified_lle	extra_trees	-1.976e-06
0.927181	0.0480999	0.376433	0.0020013	0.376431	0.000221608	{'classifier__max_depth': 20, 'classifier__min_samples_leaf': 5, 'classifier__min_samples_split': 2, 'classifier__n_estimators': 300}	37	standard	modified_lle	extra_trees	-1.976e-06
1238382101	0.0649999	0.376433	0.0020013	0.376431	0.000221608	{'classifier__max_depth': 20, 'classifier__min_samples_leaf': 5, 'classifier__min_samples_split': 2, 'classifier__n_estimators': 500}	37	standard	modified_lle	extra_trees	-1.976e-06
0.635853	0.0324011	0.376433	0.0020013	0.376431	0.000221608	{'classifier__max_depth': 20, 'classifier__min_samples_leaf': 5, 'classifier__min_samples_split': 10, 'classifier__n_estimators': 100}	37	standard	modified_lle	extra_trees	-1.976e-06
0.8057	0.0429003	0.376433	0.0020013	0.376431	0.000221608	{'classifier__max_depth': 20, 'classifier__min_samples_leaf': 5, 'classifier__min_samples_split': 10, 'classifier__n_estimators': 200}	37	standard	modified_lle	extra_trees	-1.976e-06
0.987	0.0502008	0.376433	0.0020013	0.376431	0.000221608	{'classifier__max_depth': 20, 'classifier__min_samples_leaf': 5, 'classifier__min_samples_split': 10, 'classifier__n_estimators': 300}	37	standard	modified_lle	extra_trees	-1.976e-06
1260804796	0.0655185	0.376433	0.0020013	0.376431	0.000221608	{'classifier__max_depth': 20, 'classifier__min_samples_leaf': 5, 'classifier__min_samples_split': 10, 'classifier__n_estimators': 500}	37	standard	modified_lle	extra_trees	-1.976e-06
0.636504	0.0331999	0.376433	0.0020013	0.376431	0.000221608	{'classifier__max_depth': 20, 'classifier__min_samples_leaf': 5, 'classifier__min_samples_split': 20, 'classifier__n_estimators': 100}	37	standard	modified_lle	extra_trees	-1.976e-06
0.781993	0.0385002	0.376433	0.0020013	0.376431	0.000221608	{'classifier__max_depth': 20, 'classifier__min_samples_leaf': 5, 'classifier__min_samples_split': 20, 'classifier__n_estimators': 200}	37	standard	modified_lle	extra_trees	-1.976e-06
0.94996	0.0504161	0.376433	0.0020013	0.376431	0.000221608	{'classifier__max_depth': 20, 'classifier__min_samples_leaf': 5, 'classifier__min_samples_split': 20, 'classifier__n_estimators': 300}	37	standard	modified_lle	extra_trees	-1.976e-06
1217383361	0.0612999	0.376433	0.0020013	0.376431	0.000221608	{'classifier__max_depth': 20, 'classifier__min_samples_leaf': 5, 'classifier__min_samples_split': 20, 'classifier__n_estimators': 500}	37	standard	modified_lle	extra_trees	-1.976e-06
0.628484	0.0309452	0.376433	0.0020013	0.376431	0.000221608	{'classifier__max_depth': 20, 'classifier__min_samples_leaf': 10, 'classifier__min_samples_split': 2, 'classifier__n_estimators': 100}	37	standard	modified_lle	extra_trees	-1.976e-06
0.793468	0.0388998	0.376433	0.0020013	0.376431	0.000221608	{'classifier__max_depth': 20, 'classifier__min_samples_leaf': 10, 'classifier__min_samples_split': 2, 'classifier__n_estimators': 200}	37	standard	modified_lle	extra_trees	-1.976e-06
0.933801	0.0482999	0.376433	0.0020013	0.376431	0.000221608	{'classifier__max_depth': 20, 'classifier__min_samples_leaf': 10, 'classifier__min_samples_split': 2, 'classifier__n_estimators': 300}	37	standard	modified_lle	extra_trees	-1.976e-06
1226763606	0.0645994	0.376433	0.0020013	0.376431	0.000221608	{'classifier__max_depth': 20, 'classifier__min_samples_leaf': 10, 'classifier__min_samples_split': 2, 'classifier__n_estimators': 500}	37	standard	modified_lle	extra_trees	-1.976e-06
0.637098	0.0317997	0.376433	0.0020013	0.376431	0.000221608	{'classifier__max_depth': 20, 'classifier__min_samples_leaf': 10, 'classifier__min_samples_split': 10, 'classifier__n_estimators': 100}	37	standard	modified_lle	extra_trees	-1.976e-06
0.784575	0.0428	0.376433	0.0020013	0.376431	0.000221608	{'classifier__max_depth': 20, 'classifier__min_samples_leaf': 10, 'classifier__min_samples_split': 10, 'classifier__n_estimators': 200}	37	standard	modified_lle	extra_trees	-1.976e-06
0.954986	0.0473001	0.376433	0.0020013	0.376431	0.000221608	{'classifier__max_depth': 20, 'classifier__min_samples_leaf': 10, 'classifier__min_samples_split': 10, 'classifier__n_estimators': 300}	37	standard	modified_lle	extra_trees	-1.976e-06
1225071263	0.0667172	0.376433	0.0020013	0.376431	0.000221608	{'classifier__max_depth': 20, 'classifier__min_samples_leaf': 10, 'classifier__min_samples_split': 10, 'classifier__n_estimators': 500}	37	standard	modified_lle	extra_trees	-1.976e-06
0.624305	0.0325998	0.376433	0.0020013	0.376431	0.000221608	{'classifier__max_depth': 20, 'classifier__min_samples_leaf': 10, 'classifier__min_samples_split': 20, 'classifier__n_estimators': 100}	37	standard	modified_lle	extra_trees	-1.976e-06
0.791093	0.0404001	0.376433	0.0020013	0.376431	0.000221608	{'classifier__max_depth': 20, 'classifier__min_samples_leaf': 10, 'classifier__min_samples_split': 20, 'classifier__n_estimators': 200}	37	standard	modified_lle	extra_trees	-1.976e-06
0.943885	0.0416997	0.376433	0.0020013	0.376431	0.000221608	{'classifier__max_depth': 20, 'classifier__min_samples_leaf': 10, 'classifier__min_samples_split': 20, 'classifier__n_estimators': 300}	37	standard	modified_lle	extra_trees	-1.976e-06
1028724837	0.0344999	0.376433	0.0020013	0.376431	0.000221608	{'classifier__max_depth': 20, 'classifier__min_samples_leaf': 10, 'classifier__min_samples_split': 20, 'classifier__n_estimators': 500}	37	standard	modified_lle	extra_trees	-1.976e-06
4513235784	0.0267001	0.385861	0.00798405	0.393641	0.0145946	{'classifier__alpha': 0.0001, 'classifier__hidden_layer_sizes': (50,)}	8	standard	modified_lle	mlp	0.00778028
6474786067	0.0253173	0.401365	0.0207766	0.41055	0.0153809	{'classifier__alpha': 0.0001, 'classifier__hidden_layer_sizes': (100,)}	4	standard	modified_lle	mlp	0.00918535
7368288183	0.0247995	0.457228	0.0446368	0.46532	0.0270662	{'classifier__alpha': 0.0001, 'classifier__hidden_layer_sizes': (50, 50)}	2	standard	modified_lle	mlp	0.00809198
4957616305	0.0244999	0.38787	0.0121069	0.394464	0.0141436	{'classifier__alpha': 0.001, 'classifier__hidden_layer_sizes': (50,)}	7	standard	modified_lle	mlp	0.00659435
5587121701	0.0248004	0.393946	0.0175024	0.403293	0.0192195	{'classifier__alpha': 0.001, 'classifier__hidden_layer_sizes': (100,)}	5	standard	modified_lle	mlp	0.00934729
7182990694	0.0234998	0.467336	0.0288057	0.468465	0.0190119	{'classifier__alpha': 0.001, 'classifier__hidden_layer_sizes': (50, 50)}	1	standard	modified_lle	mlp	0.00112827
3811616206	0.0244998	0.383158	0.00715762	0.390572	0.0139916	{'classifier__alpha': 0.01, 'classifier__hidden_layer_sizes': (50,)}	9	standard	modified_lle	mlp	0.00741412
5114662337	0.0197998	0.389901	0.0114364	0.398204	0.0161273	{'classifier__alpha': 0.01, 'classifier__hidden_layer_sizes': (100,)}	6	standard	modified_lle	mlp	0.00830329
464913404	0.0136004	0.444431	0.0318181	0.449161	0.0203638	{'classifier__alpha': 0.01, 'classifier__hidden_layer_sizes': (50, 50)}	3	standard	modified_lle	mlp	0.00473002
0.0446991	0.00900047	0.585892	0.0242861	0.594912	0.00442371	{'classifier__C': 1, 'classifier__gamma': 'scale'}	1	normalizer	lda	svm_linear	0.00901982
0.0448005	0.00920029	0.585892	0.0242861	0.594912	0.00442371	{'classifier__C': 1, 'classifier__gamma': 'auto'}	1	normalizer	lda	svm_linear	0.00901982
3778689551	0.0216156	0.584505	0.0241448	0.594462	0.00784063	{'classifier__alpha': 0.0001, 'classifier__hidden_layer_sizes': (50,)}	1	yeo-johnson	isomap	mlp	0.00995745
0.990941	0.0356986	0.575063	0.0195907	0.59162	0.00731312	{'classifier__C': 10, 'classifier__gamma': 'scale'}	1	standard	isomap	svm_rbf	0.0165564
0.0154989	0.00350056	0.579816	0.0224307	0.587131	0.00532695	{}	1	normalizer	lda	lda	0.00731484
2222624524	0.0154936	0.565658	0.0244518	0.584811	0.00667629	{'classifier__C': 10, 'classifier__penalty': 'l1', 'classifier__solver': 'liblinear'}	1	quantile-uniform	nca	logistic_regression	0.019153
9.27486	0.0273001	0.56228	0.0179407	0.584438	0.00720609	{'classifier__alpha': 0.0001, 'classifier__hidden_layer_sizes': (100,)}	1	minmax	isomap	mlp	0.0221575
2239363589	0.0483035	0.569059	0.0235426	0.580394	0.00642048	{'classifier__C': 10, 'classifier__penalty': 'l1', 'classifier__solver': 'liblinear'}	1	quantile-normal	nca	logistic_regression	0.011335
0.64088	0.0437006	0.572429	0.0237863	0.579049	0.014679	{'classifier__C': 10, 'classifier__gamma': 'scale'}	1	quantile-uniform	modified_lle	svm_rbf	0.00661994
0.185621	0.0399002	0.567708	0.0198879	0.576356	0.00678018	{'classifier__C': 10, 'classifier__penalty': 'l1', 'classifier__solver': 'liblinear'}	1	quantile-normal	lda	logistic_regression	0.00864829
1703730834	0.00369949	0.554834	0.0237179	0.574262	0.00958433	{'classifier__alpha': 0.01, 'classifier__hidden_layer_sizes': (50, 50)}	1	standard	nca	mlp	0.0194277
1103043318	0.0473015	0.56092	0.016981	0.571418	0.00526808	{'classifier__C': 1, 'classifier__gamma': 'scale'}	1	standard	isomap	svm_linear	0.0104981
1065577507	0.0387969	0.56092	0.016981	0.571418	0.00526808	{'classifier__C': 1, 'classifier__gamma': 'auto'}	1	standard	isomap	svm_linear	0.0104981
8449657202	0.0385164	0.560276	0.0247505	0.57097	0.00425438	{'classifier__C': 10, 'classifier__gamma': 'scale'}	1	quantile-normal	isomap	svm_linear	0.0106938
8126327562	0.0352001	0.560276	0.0247505	0.57097	0.00425438	{'classifier__C': 10, 'classifier__gamma': 'auto'}	1	quantile-normal	isomap	svm_linear	0.0106938
1.24984	0.0597991	0.554186	0.0242114	0.568202	0.0104694	{'classifier__C': 1, 'classifier__gamma': 'auto'}	1	minmax	isomap	svm_rbf	0.014016
0.655847	0.0202914	0.562266	0.0208716	0.568124	0.00622652	{}	1	standard	isomap	gaussian_nb	0.00585772
0.655936	0.0167969	0.562294	0.0168551	0.56805	0.00641721	{}	1	standard	isomap	lda	0.00575645
0.0678964	0.0123012	0.560942	0.0122843	0.566929	0.00361457	{'classifier__C': 0.1, 'classifier__gamma': 'scale'}	1	normalizer	lda	svm_sigmoid	0.00598633
642267015	0.028819	0.57174	0.0218694	0.56633	0.00924178	{'classifier__alpha': 0.0001, 'classifier__hidden_layer_sizes': (50, 50)}	1	quantile-uniform	modified_lle	mlp	-0.00540951
0.0688108	0.0122	0.562983	0.0145184	0.565582	0.00176131	{'classifier__C': 0.1, 'classifier__gamma': 'scale'}	1	standard	lda	svm_sigmoid	0.00259896
0.082079	0.0119002	0.562983	0.0145184	0.565582	0.00176131	{'classifier__C': 0.1, 'classifier__gamma': 'scale'}	1	robust	lda	svm_sigmoid	0.00259896
0.0685958	0.0116998	0.562983	0.0145184	0.565582	0.00176131	{'classifier__C': 0.1, 'classifier__gamma': 'scale'}	1	maxabs	lda	svm_sigmoid	0.00259896
0.0730972	0.015501	0.562983	0.0145184	0.565582	0.00176131	{'classifier__C': 0.1, 'classifier__gamma': 'scale'}	1	minmax	lda	svm_sigmoid	0.00259896
9.26067	0.0131	0.54678	0.0185458	0.561391	0.00318654	{'classifier__alpha': 0.01, 'classifier__hidden_layer_sizes': (100,)}	1	minmax	ica	mlp	0.014611
10.4248	0.00940051	0.550145	0.0199041	0.559147	0.00577021	{'classifier__alpha': 0.0001, 'classifier__hidden_layer_sizes': (50,)}	1	minmax	pca	mlp	0.00900168
0.226903	0.0352333	0.56296	0.0160432	0.557874	0.0148884	{}	1	quantile-normal	lle	gaussian_nb	-0.00508582
0.729961	0.0190948	0.545483	0.0202442	0.554734	0.00912068	{}	1	quantile-uniform	isomap	gaussian_nb	0.00925081
5320851827	0.00549998	0.529966	0.0212623	0.552264	0.00468056	{'classifier__alpha': 0.0001, 'classifier__hidden_layer_sizes': (100,)}	1	standard	ica	mlp	0.0222981
1013815165	0.0606977	0.546145	0.0210825	0.552115	0.0109582	{'classifier__C': 1, 'classifier__gamma': 'scale'}	1	quantile-uniform	isomap	svm_linear	0.00596915
113941555	0.0429955	0.546145	0.0210825	0.552115	0.0109582	{'classifier__C': 1, 'classifier__gamma': 'auto'}	1	quantile-uniform	isomap	svm_linear	0.00596915
252897393	0.0725323	0.539407	0.0189299	0.552113	0.00686341	{'classifier__C': 0.1, 'classifier__gamma': 'scale'}	1	quantile-normal	nca	svm_sigmoid	0.0127066
0.733074	0.016698	0.544762	0.0207892	0.55077	0.0109599	{}	1	quantile-uniform	isomap	lda	0.00600734
2522053437	0.0127991	0.544808	0.0197836	0.550619	0.00944456	{'classifier__C': 1, 'classifier__penalty': 'l1', 'classifier__solver': 'liblinear'}	1	standard	nca	logistic_regression	0.00581117
0.201398	0.0713019	0.540078	0.0189646	0.549121	0.00353493	{'classifier__C': 1, 'classifier__gamma': 'scale'}	1	minmax	ica	svm_rbf	0.00904289
0.192697	0.0808166	0.540078	0.0189646	0.549121	0.00353493	{'classifier__C': 1, 'classifier__gamma': 'auto'}	1	minmax	ica	svm_rbf	0.00904289
3227136755	0.00410011	0.528614	0.0222424	0.548971	0.00476084	{'classifier__alpha': 0.01, 'classifier__hidden_layer_sizes': (100,)}	1	standard	pca	mlp	0.0203568
3520784044	0.00509975	0.531993	0.0242148	0.548822	0.00482357	{'classifier__alpha': 0.01, 'classifier__hidden_layer_sizes': (50,)}	1	standard	truncatedsvd	mlp	0.016829
0.0961983	0.0284011	0.541425	0.0150847	0.548672	0.00371268	{'classifier__C': 1, 'classifier__gamma': 'scale'}	1	minmax	pca	svm_rbf	0.00724703
246829366	0.0239026	0.536718	0.0169339	0.54276	0.00875248	{'classifier__C': 0.1, 'classifier__gamma': 'scale'}	1	yeo-johnson	nca	svm_sigmoid	0.00604248
2553144035	0.0233054	0.542758	0.0166354	0.541939	0.00832292	{'classifier__C': 0.1, 'classifier__gamma': 'scale'}	1	standard	nca	svm_sigmoid	-0.000818569
0.0819001	0.0269993	0.528614	0.02476	0.541713	0.00478618	{'classifier__C': 1, 'classifier__gamma': 'scale'}	1	standard	pca	svm_rbf	0.013099
0.0858995	0.0263023	0.528614	0.02476	0.541713	0.00478618	{'classifier__C': 1, 'classifier__gamma': 'scale'}	1	standard	truncatedsvd	svm_rbf	0.013099
0.190799	0.0439016	0.533339	0.0162651	0.537823	0.00206944	{'classifier__C': 0.1, 'classifier__gamma': 'scale'}	1	quantile-normal	lda	svm_sigmoid	0.00448348
0.1637	0.0155008	0.528623	0.00868403	0.535728	0.00456895	{'classifier__C': 0.1, 'classifier__gamma': 'scale'}	1	quantile-uniform	lda	svm_sigmoid	0.00710469
4170321584	0.00910044	0.507065	0.0188259	0.535727	0.0043901	{'classifier__alpha': 0.001, 'classifier__hidden_layer_sizes': (50,)}	1	yeo-johnson	pca	mlp	0.0286623
1214357281	0.0305236	0.545483	0.0240784	0.535501	0.0121138	{'classifier__C': 10, 'classifier__penalty': 'l1', 'classifier__solver': 'liblinear'}	1	yeo-johnson	isomap	logistic_regression	-0.00998281
0.287399	0.015	0.531988	0.0161415	0.535354	0.00233929	{'classifier__C': 0.1, 'classifier__gamma': 'scale'}	1	yeo-johnson	lda	svm_sigmoid	0.00336561
4731202626	0.00959964	0.509106	0.0230261	0.534979	0.00355974	{'classifier__alpha': 0.001, 'classifier__hidden_layer_sizes': (100,)}	1	quantile-uniform	ica	mlp	0.0258734
0.5087	0.0241186	0.511745	0.0209468	0.533335	0.0152164	{'classifier__max_depth': 5, 'classifier__min_samples_leaf': 10, 'classifier__min_samples_split': 20}	1	maxabs	modified_lle	decision_tree	0.0215896
0.334892	0.0174992	0.533335	0.0209493	0.533185	0.0103868	{}	1	quantile-uniform	modified_lle	gaussian_nb	-0.000149402
0.157942	0.0217999	0.510457	0.024186	0.533183	0.00387909	{'classifier__C': 10, 'classifier__gamma': 'auto'}	1	quantile-uniform	pca	svm_rbf	0.0227263
4575117731	0.00910018	0.507061	0.0136623	0.533034	0.00414354	{'classifier__alpha': 0.001, 'classifier__hidden_layer_sizes': (50,)}	1	yeo-johnson	ica	mlp	0.0259733
4068150473	0.00709937	0.511124	0.0209561	0.532434	0.00568176	{'classifier__alpha': 0.01, 'classifier__hidden_layer_sizes': (100,)}	1	quantile-uniform	pca	mlp	0.0213104
0.0566293	0.0110161	0.525249	0.0166035	0.531014	0.0040091	{'classifier__C': 10, 'classifier__gamma': 'scale'}	1	minmax	pca	svm_linear	0.00576431
0.0555909	0.0106	0.525249	0.0166035	0.531014	0.0040091	{'classifier__C': 10, 'classifier__gamma': 'auto'}	1	minmax	pca	svm_linear	0.00576431
0.168299	0.0191011	0.523889	0.0189654	0.530415	0.00436006	{'classifier__C': 10, 'classifier__gamma': 'scale'}	1	minmax	ica	svm_linear	0.00652593
0.136298	0.0113001	0.523889	0.0189654	0.530415	0.00436006	{'classifier__C': 10, 'classifier__gamma': 'auto'}	1	minmax	ica	svm_linear	0.00652593
0.074915	0.00879993	0.522556	0.0248079	0.530116	0.00405023	{'classifier__C': 10, 'classifier__gamma': 'scale'}	1	standard	ica	svm_linear	0.00755974
0.0687999	0.00699971	0.522556	0.0248079	0.530116	0.00405023	{'classifier__C': 10, 'classifier__gamma': 'auto'}	1	standard	ica	svm_linear	0.00755974
4045462441	0.0411398	0.498966	0.0247716	0.527348	0.00525981	{'classifier__alpha': 0.0001, 'classifier__hidden_layer_sizes': (100,)}	1	quantile-normal	truncatedsvd	mlp	0.0283818
1.24694	0.0200006	0.518506	0.0248869	0.526898	0.0137662	{'classifier__C': 10, 'classifier__gamma': 'auto'}	1	minmax	isomap	svm_poly	0.00839154
0.334936	0.0411339	0.501016	0.0247872	0.526751	0.0110705	{'classifier__C': 10, 'classifier__gamma': 'scale'}	1	maxabs	lle	svm_rbf	0.0257352
4509115911	0.0411	0.496277	0.0249416	0.523457	0.00250409	{'classifier__alpha': 0.0001, 'classifier__hidden_layer_sizes': (50,)}	1	quantile-normal	ica	mlp	0.0271797
1289938641	0.0587991	0.525943	0.0223556	0.522932	0.00813916	{'classifier__C': 0.1, 'classifier__gamma': 'scale'}	1	yeo-johnson	isomap	svm_sigmoid	-0.00301166
0.938564	0.040301	0.497651	0.0229992	0.52151	0.00454325	{'classifier__C': 10, 'classifier__gamma': 'scale'}	1	normalizer	isomap	svm_rbf	0.0238593
0.595883	0.02703	0.523939	0.0221539	0.520614	0.00594742	{'classifier__C': 10, 'classifier__penalty': 'l1', 'classifier__solver': 'liblinear'}	1	quantile-uniform	modified_lle	logistic_regression	-0.00332464
4247863698	0.00550029	0.505079	0.0235263	0.52054	0.00489052	{'classifier__alpha': 0.001, 'classifier__hidden_layer_sizes': (50,)}	1	maxabs	pca	mlp	0.015461
0.187299	0.031101	0.49625	0.0232945	0.52009	0.00327893	{'classifier__C': 10, 'classifier__gamma': 'scale'}	1	normalizer	ica	svm_rbf	0.02384
0.152299	0.0214003	0.49625	0.0232945	0.52009	0.00327893	{'classifier__C': 10, 'classifier__gamma': 'auto'}	1	normalizer	ica	svm_rbf	0.02384
0.0111986	0.00320136	0.517853	0.0195473	0.519941	0.00458468	{}	1	minmax	pca	lda	0.0020876
0.0232004	0.00510004	0.517853	0.0195473	0.519941	0.00458468	{}	1	minmax	ica	lda	0.0020876
0.0105002	0.0035008	0.509083	0.0235564	0.519866	0.00389997	{}	1	standard	pca	gaussian_nb	0.0107828
0.0123988	0.00389946	0.509083	0.0235564	0.519866	0.00389997	{}	1	standard	truncatedsvd	gaussian_nb	0.0107828
0.164116	0.0266002	0.494223	0.0237624	0.519116	0.00465248	{'classifier__C': 10, 'classifier__gamma': 'scale'}	1	normalizer	pca	svm_rbf	0.0248935
1624252323	0.00979991	0.511822	0.0240567	0.518743	0.0069186	{'classifier__C': 0.1, 'classifier__gamma': 'scale'}	1	normalizer	nca	svm_linear	0.00692069
1630105524	0.0098006	0.511822	0.0240567	0.518743	0.0069186	{'classifier__C': 0.1, 'classifier__gamma': 'auto'}	1	normalizer	nca	svm_linear	0.00692069
0.329801	0.0164985	0.51248	0.0160803	0.517697	0.00971589	{}	1	quantile-uniform	modified_lle	lda	0.0052171
0.208959	0.0629987	0.50234	0.0239236	0.516124	0.0040585	{'classifier__C': 1, 'classifier__gamma': 'scale'}	1	quantile-normal	truncatedsvd	svm_rbf	0.0137844
0.207501	0.0598497	0.50234	0.0239236	0.516049	0.00402401	{'classifier__C': 1, 'classifier__gamma': 'scale'}	1	quantile-normal	pca	svm_rbf	0.0137096
6580567002	0.0241999	0.509106	0.0194242	0.514855	0.0147893	{'classifier__alpha': 0.001, 'classifier__hidden_layer_sizes': (50, 50)}	1	maxabs	lle	mlp	0.00574882
0.436626	0.0285131	0.496336	0.0217251	0.511259	0.00671436	{'classifier__C': 10, 'classifier__gamma': 'scale'}	1	minmax	ica	svm_poly	0.014923
0.395167	0.0179003	0.496336	0.0217251	0.511259	0.00671436	{'classifier__C': 10, 'classifier__gamma': 'auto'}	1	minmax	ica	svm_poly	0.014923
1132899165	0.0257018	0.512466	0.0217176	0.511185	0.00582413	{'classifier__C': 0.1, 'classifier__gamma': 'scale'}	1	standard	isomap	svm_sigmoid	-0.00128066
0.155134	0.00989962	0.494989	0.0197975	0.510286	0.0064269	{'classifier__C': 10, 'classifier__gamma': 'scale'}	1	minmax	pca	svm_poly	0.0152972
0.0230001	0.0056998	0.507065	0.0208655	0.510213	0.00564362	{}	1	minmax	ica	gaussian_nb	0.00314772
0.422658	0.0590996	0.50843	0.0200527	0.509842	0.0154462	{'classifier__C': 10, 'classifier__penalty': 'l1', 'classifier__solver': 'liblinear'}	1	quantile-normal	lle	logistic_regression	0.00141238
1216041279	0.0556945	0.512457	0.0147749	0.509765	0.00734538	{'classifier__C': 0.1, 'classifier__gamma': 'scale'}	1	quantile-normal	isomap	svm_sigmoid	-0.00269162
0.148398	0.0117013	0.503732	0.0189487	0.508493	0.0033551	{'classifier__C': 10, 'classifier__gamma': 'scale'}	1	quantile-uniform	pca	svm_linear	0.00476043
0.1204	0.0088006	0.503732	0.0189487	0.508493	0.0033551	{'classifier__C': 10, 'classifier__gamma': 'auto'}	1	quantile-uniform	pca	svm_linear	0.00476043
0.0647021	0.00520015	0.503705	0.0236542	0.508118	0.00450162	{}	1	quantile-uniform	pca	lda	0.0044131
0.0671005	0.0055995	0.503705	0.0236542	0.508118	0.00450162	{}	1	quantile-uniform	ica	lda	0.0044131
0.0643003	0.00580065	0.494277	0.0202046	0.507594	0.00370341	{}	1	quantile-uniform	pca	gaussian_nb	0.0133171
0.1413	0.0128996	0.504408	0.0196064	0.505276	0.00340719	{'classifier__C': 1, 'classifier__gamma': 'scale'}	1	quantile-uniform	ica	svm_linear	0.000867979
0.145999	0.0124991	0.504408	0.0196064	0.505276	0.00340719	{'classifier__C': 1, 'classifier__gamma': 'auto'}	1	quantile-uniform	ica	svm_linear	0.000867979
0.28575	0.0307117	0.493611	0.0200963	0.500038	0.00383877	{'classifier__C': 10, 'classifier__gamma': 'auto'}	1	quantile-normal	truncatedsvd	svm_linear	0.00642695
0.311399	0.037701	0.493611	0.0200963	0.499888	0.00382269	{'classifier__C': 10, 'classifier__gamma': 'scale'}	1	quantile-normal	pca	svm_linear	0.00627725
0.257797	0.0288191	0.493611	0.0200963	0.499888	0.00382269	{'classifier__C': 10, 'classifier__gamma': 'auto'}	1	quantile-normal	pca	svm_linear	0.00627725
0.333345	0.0366	0.493611	0.0200963	0.499888	0.00382269	{'classifier__C': 10, 'classifier__gamma': 'scale'}	1	quantile-normal	truncatedsvd	svm_linear	0.00627725
0.218946	0.040998	0.491579	0.0181309	0.499514	0.00336326	{'classifier__C': 10, 'classifier__gamma': 'scale'}	1	quantile-normal	ica	svm_linear	0.0079349
0.189799	0.0288018	0.491579	0.0181309	0.499514	0.00336326	{'classifier__C': 10, 'classifier__gamma': 'auto'}	1	quantile-normal	ica	svm_linear	0.0079349
0.134901	0.005899	0.487525	0.0237786	0.499289	0.00604594	{}	1	yeo-johnson	ica	gaussian_nb	0.0117641
0.130398	0.00550015	0.483489	0.0223999	0.498691	0.00321459	{}	1	yeo-johnson	pca	gaussian_nb	0.0152017
6757333794	0.00880008	0.585158	0.0249209	0.595138	0.0104759	{'classifier__C': 0.1, 'classifier__gamma': 'scale'}	3	standard	nca	svm_linear	0.00997983
6783624036	0.00880001	0.585158	0.0249209	0.595138	0.0104759	{'classifier__C': 0.1, 'classifier__gamma': 'auto'}	3	standard	nca	svm_linear	0.00997983
1659281495	0.00850024	0.585829	0.0253264	0.595212	0.0102608	{'classifier__C': 1, 'classifier__gamma': 'scale'}	1	standard	nca	svm_linear	0.00938343
1594882062	0.0082	0.585829	0.0253264	0.595212	0.0102608	{'classifier__C': 1, 'classifier__gamma': 'auto'}	1	standard	nca	svm_linear	0.00938343
3262637608	0.00630019	0.5845	0.0251688	0.594689	0.00965935	{'classifier__C': 10, 'classifier__gamma': 'scale'}	5	standard	nca	svm_linear	0.0101885
3015076651	0.00640008	0.5845	0.0251688	0.594689	0.00965935	{'classifier__C': 10, 'classifier__gamma': 'auto'}	5	standard	nca	svm_linear	0.0101885
242344193	0.036397	0.56969	0.0164938	0.578228	0.00933665	{'classifier__C': 0.1, 'classifier__gamma': 'scale'}	3	standard	nca	svm_rbf	0.00853837
2506705983	0.057795	0.376433	0.0020013	0.376431	0.000221608	{'classifier__C': 0.1, 'classifier__gamma': 'auto'}	4	standard	nca	svm_rbf	-1.976e-06
2427701974	0.0294977	0.595914	0.0259035	0.614292	0.0080912	{'classifier__C': 1, 'classifier__gamma': 'scale'}	1	standard	nca	svm_rbf	0.0183779
2188782179	0.0231967	0.595878	0.0334163	0.623794	0.00592861	{'classifier__C': 10, 'classifier__gamma': 'scale'}	2	standard	nca	svm_rbf	0.0279161
0.132072	0.00580034	0.483489	0.0223999	0.498691	0.00321459	{}	1	yeo-johnson	truncatedsvd	gaussian_nb	0.0152017
2531674318	0.0167013	0.461291	0.0243755	0.453126	0.0163798	{'classifier__C': 0.1, 'classifier__gamma': 'auto'}	3	standard	nca	svm_sigmoid	-0.00816553
2490161419	0.0221012	0.471331	0.0377333	0.471308	0.0124785	{'classifier__C': 1, 'classifier__gamma': 'scale'}	2	standard	nca	svm_sigmoid	-2.3025e-05
2480092909	0.0221054	0.422266	0.0296772	0.42222	0.0164177	{'classifier__C': 1, 'classifier__gamma': 'auto'}	5	standard	nca	svm_sigmoid	-4.5092e-05
2269233322	0.0156964	0.424868	0.0286611	0.437188	0.00777858	{'classifier__C': 10, 'classifier__gamma': 'scale'}	4	standard	nca	svm_sigmoid	0.0123198
1294512334	0.00759931	0.420243	0.0294932	0.421771	0.0169981	{'classifier__C': 10, 'classifier__gamma': 'auto'}	6	standard	nca	svm_sigmoid	0.00152807
2535631363	0.0108971	0.534704	0.0198872	0.539694	0.00826847	{'classifier__C': 0.1, 'classifier__penalty': 'l1', 'classifier__solver': 'liblinear'}	5	standard	nca	logistic_regression	0.00498995
2533764071	0.0139084	0.521232	0.021735	0.528246	0.00861017	{'classifier__C': 0.1, 'classifier__penalty': 'l2', 'classifier__solver': 'liblinear'}	6	standard	nca	logistic_regression	0.00701481
0.0724016	0.00999985	0.494957	0.0164782	0.49727	0.0081436	{'classifier__C': 10, 'classifier__gamma': 'auto'}	1	minmax	pca	svm_sigmoid	0.00231247
249277627	0.0104993	0.541438	0.0205723	0.546204	0.00847925	{'classifier__C': 1, 'classifier__penalty': 'l2', 'classifier__solver': 'liblinear'}	4	standard	nca	logistic_regression	0.00476566
2264689751	0.00729907	0.543461	0.0192187	0.551592	0.010059	{'classifier__C': 10, 'classifier__penalty': 'l1', 'classifier__solver': 'liblinear'}	3	standard	nca	logistic_regression	0.00813065
1295255306	0.00360162	0.544137	0.0201505	0.550843	0.00950343	{'classifier__C': 10, 'classifier__penalty': 'l2', 'classifier__solver': 'liblinear'}	2	standard	nca	logistic_regression	0.00670664
9781802464	0.0032999	0.588532	0.0276082	0.596934	0.00966107	{}	1	standard	nca	lda	0.008402
9852842951	0.00379982	0.584478	0.0294726	0.605465	0.0143203	{}	1	standard	nca	gaussian_nb	0.0209877
2533991766	0.0521976	0.464634	0.0667244	0.492407	0.0905226	{'classifier__max_depth': None, 'classifier__min_samples_leaf': 5, 'classifier__min_samples_split': 2, 'classifier__n_estimators': 500}	48	standard	nca	extra_trees	0.0277733
2538471496	0.0480018	0.468012	0.0761123	0.497719	0.101744	{'classifier__max_depth': None, 'classifier__min_samples_leaf': 5, 'classifier__min_samples_split': 10, 'classifier__n_estimators': 300}	41	standard	nca	extra_trees	0.0297074
2439307423	0.028399	0.458589	0.0670549	0.487989	0.0820259	{'classifier__max_depth': None, 'classifier__min_samples_leaf': 5, 'classifier__min_samples_split': 20, 'classifier__n_estimators': 100}	64	standard	nca	extra_trees	0.0294003
2509110856	0.0482509	0.465327	0.0687664	0.492179	0.087207	{'classifier__max_depth': None, 'classifier__min_samples_leaf': 5, 'classifier__min_samples_split': 20, 'classifier__n_estimators': 300}	45	standard	nca	extra_trees	0.0268518
2508994684	0.0586042	0.461931	0.06781	0.488967	0.0875517	{'classifier__max_depth': None, 'classifier__min_samples_leaf': 5, 'classifier__min_samples_split': 20, 'classifier__n_estimators': 500}	56	standard	nca	extra_trees	0.0270362
2419236178	0.0214026	0.402671	0.0273301	0.409283	0.0401098	{'classifier__max_depth': None, 'classifier__min_samples_leaf': 10, 'classifier__min_samples_split': 2, 'classifier__n_estimators': 100}	77	standard	nca	extra_trees	0.00661176
246413506	0.0320053	0.391919	0.0171941	0.395586	0.0223277	{'classifier__max_depth': None, 'classifier__min_samples_leaf': 10, 'classifier__min_samples_split': 2, 'classifier__n_estimators': 200}	101	standard	nca	extra_trees	0.00366703
2496945624	0.0531975	0.395297	0.0208435	0.398054	0.0299083	{'classifier__max_depth': None, 'classifier__min_samples_leaf': 10, 'classifier__min_samples_split': 2, 'classifier__n_estimators': 300}	93	standard	nca	extra_trees	0.00275664
2510317173	0.0719894	0.38855	0.0152414	0.393716	0.0211787	{'classifier__max_depth': None, 'classifier__min_samples_leaf': 10, 'classifier__min_samples_split': 2, 'classifier__n_estimators': 500}	107	standard	nca	extra_trees	0.00516575
2435772717	0.0244962	0.398662	0.0259686	0.405088	0.035276	{'classifier__max_depth': None, 'classifier__min_samples_leaf': 10, 'classifier__min_samples_split': 10, 'classifier__n_estimators': 100}	83	standard	nca	extra_trees	0.00642533
2480403211	0.0390019	0.394626	0.0270009	0.401796	0.0329052	{'classifier__max_depth': None, 'classifier__min_samples_leaf': 10, 'classifier__min_samples_split': 10, 'classifier__n_estimators': 200}	95	standard	nca	extra_trees	0.00716968
2502228661	0.0400989	0.402027	0.0318224	0.406211	0.0353005	{'classifier__max_depth': None, 'classifier__min_samples_leaf': 10, 'classifier__min_samples_split': 10, 'classifier__n_estimators': 300}	78	standard	nca	extra_trees	0.00418364
2523569345	0.0633942	0.391243	0.0167785	0.394014	0.0213697	{'classifier__max_depth': None, 'classifier__min_samples_leaf': 10, 'classifier__min_samples_split': 10, 'classifier__n_estimators': 500}	104	standard	nca	extra_trees	0.00277101
2422133679	0.0256977	0.406081	0.0376054	0.414363	0.046623	{'classifier__max_depth': None, 'classifier__min_samples_leaf': 10, 'classifier__min_samples_split': 20, 'classifier__n_estimators': 100}	73	standard	nca	extra_trees	0.00828178
2487084787	0.0375008	0.401351	0.0281485	0.408305	0.03868	{'classifier__max_depth': None, 'classifier__min_samples_leaf': 10, 'classifier__min_samples_split': 20, 'classifier__n_estimators': 200}	80	standard	nca	extra_trees	0.00695406
2505739217	0.0359978	0.393937	0.0233004	0.398804	0.0313988	{'classifier__max_depth': None, 'classifier__min_samples_leaf': 10, 'classifier__min_samples_split': 20, 'classifier__n_estimators': 300}	98	standard	nca	extra_trees	0.0048673
2519724493	0.0627004	0.397973	0.0252959	0.40277	0.0334476	{'classifier__max_depth': None, 'classifier__min_samples_leaf': 10, 'classifier__min_samples_split': 20, 'classifier__n_estimators': 500}	85	standard	nca	extra_trees	0.00479727
2420814066	0.0163051	0.466665	0.0717855	0.491432	0.0890828	{'classifier__max_depth': 10, 'classifier__min_samples_leaf': 5, 'classifier__min_samples_split': 2, 'classifier__n_estimators': 100}	43	standard	nca	extra_trees	0.0247671
2467572229	0.0368981	0.453247	0.0680053	0.480056	0.0873503	{'classifier__max_depth': 10, 'classifier__min_samples_leaf': 5, 'classifier__min_samples_split': 2, 'classifier__n_estimators': 200}	69	standard	nca	extra_trees	0.0268087
2521366694	0.0404575	0.464606	0.0671928	0.494055	0.0866672	{'classifier__max_depth': 10, 'classifier__min_samples_leaf': 5, 'classifier__min_samples_split': 2, 'classifier__n_estimators': 300}	49	standard	nca	extra_trees	0.0294485
2490819058	0.0350997	0.460611	0.0674778	0.486268	0.0826641	{'classifier__max_depth': 10, 'classifier__min_samples_leaf': 5, 'classifier__min_samples_split': 10, 'classifier__n_estimators': 200}	59	standard	nca	extra_trees	0.0256565
2513105922	0.0475009	0.457895	0.06695	0.486348	0.0899755	{'classifier__max_depth': 10, 'classifier__min_samples_leaf': 5, 'classifier__min_samples_split': 10, 'classifier__n_estimators': 300}	65	standard	nca	extra_trees	0.0284529
2526597595	0.0707051	0.460589	0.0643971	0.488368	0.083182	{'classifier__max_depth': 10, 'classifier__min_samples_leaf': 5, 'classifier__min_samples_split': 10, 'classifier__n_estimators': 500}	61	standard	nca	extra_trees	0.0277789
2472904456	0.0412015	0.463944	0.0637266	0.488068	0.0828371	{'classifier__max_depth': 10, 'classifier__min_samples_leaf': 5, 'classifier__min_samples_split': 20, 'classifier__n_estimators': 200}	51	standard	nca	extra_trees	0.0241236
2496036201	0.048803	0.453845	0.066444	0.479539	0.0859752	{'classifier__max_depth': 10, 'classifier__min_samples_leaf': 5, 'classifier__min_samples_split': 20, 'classifier__n_estimators': 300}	68	standard	nca	extra_trees	0.025694
2527794449	0.0810009	0.447134	0.06167	0.465394	0.0744404	{'classifier__max_depth': 10, 'classifier__min_samples_leaf': 5, 'classifier__min_samples_split': 20, 'classifier__n_estimators': 500}	71	standard	nca	extra_trees	0.0182604
2433194783	0.0238124	0.396631	0.0260904	0.403892	0.038646	{'classifier__max_depth': 10, 'classifier__min_samples_leaf': 10, 'classifier__min_samples_split': 2, 'classifier__n_estimators': 100}	89	standard	nca	extra_trees	0.00726147
2474503257	0.0405266	0.401329	0.0327465	0.407411	0.040906	{'classifier__max_depth': 10, 'classifier__min_samples_leaf': 10, 'classifier__min_samples_split': 2, 'classifier__n_estimators': 200}	81	standard	nca	extra_trees	0.00608234
2508464861	0.0345952	0.388554	0.0144448	0.391995	0.0201348	{'classifier__max_depth': 10, 'classifier__min_samples_leaf': 10, 'classifier__min_samples_split': 2, 'classifier__n_estimators': 300}	106	standard	nca	extra_trees	0.00344067
2522112401	0.0646575	0.395955	0.0231622	0.397683	0.0291651	{'classifier__max_depth': 10, 'classifier__min_samples_leaf': 10, 'classifier__min_samples_split': 2, 'classifier__n_estimators': 500}	92	standard	nca	extra_trees	0.00172804
2453230333	0.0245954	0.391257	0.0160201	0.399325	0.0263813	{'classifier__max_depth': 10, 'classifier__min_samples_leaf': 10, 'classifier__min_samples_split': 10, 'classifier__n_estimators': 100}	103	standard	nca	extra_trees	0.00806842
2463182609	0.0301035	0.396626	0.0256951	0.397457	0.0285621	{'classifier__max_depth': 10, 'classifier__min_samples_leaf': 10, 'classifier__min_samples_split': 10, 'classifier__n_estimators': 200}	90	standard	nca	extra_trees	0.000830445
2514969313	0.0424958	0.402716	0.0303987	0.410323	0.0409001	{'classifier__max_depth': 10, 'classifier__min_samples_leaf': 10, 'classifier__min_samples_split': 10, 'classifier__n_estimators': 300}	76	standard	nca	extra_trees	0.00760704
2523950732	0.0636054	0.390568	0.0154628	0.396785	0.0260992	{'classifier__max_depth': 10, 'classifier__min_samples_leaf': 10, 'classifier__min_samples_split': 10, 'classifier__n_estimators': 500}	105	standard	nca	extra_trees	0.00621721
2434357946	0.0268083	0.402013	0.027608	0.40943	0.0369058	{'classifier__max_depth': 10, 'classifier__min_samples_leaf': 10, 'classifier__min_samples_split': 20, 'classifier__n_estimators': 100}	79	standard	nca	extra_trees	0.00741626
2453227003	0.0425253	0.391915	0.0188539	0.394689	0.0246374	{'classifier__max_depth': 10, 'classifier__min_samples_leaf': 10, 'classifier__min_samples_split': 20, 'classifier__n_estimators': 200}	102	standard	nca	extra_trees	0.00277414
2514042585	0.0457506	0.394613	0.0221405	0.397981	0.0253195	{'classifier__max_depth': 10, 'classifier__min_samples_leaf': 10, 'classifier__min_samples_split': 20, 'classifier__n_estimators': 300}	97	standard	nca	extra_trees	0.00336821
253911859	0.0668509	0.397973	0.0266847	0.401724	0.0345131	{'classifier__max_depth': 10, 'classifier__min_samples_leaf': 10, 'classifier__min_samples_split': 20, 'classifier__n_estimators': 500}	86	standard	nca	extra_trees	0.00375099
2528619947	0.0672008	0.465305	0.0682864	0.493604	0.0939345	{'classifier__max_depth': 20, 'classifier__min_samples_leaf': 5, 'classifier__min_samples_split': 10, 'classifier__n_estimators': 500}	47	standard	nca	extra_trees	0.0282996
2430625551	0.0214019	0.452499	0.0669116	0.475574	0.081134	{'classifier__max_depth': 20, 'classifier__min_samples_leaf': 5, 'classifier__min_samples_split': 20, 'classifier__n_estimators': 100}	70	standard	nca	extra_trees	0.0230755
2523620687	0.0765997	0.461917	0.07364	0.485077	0.0949545	{'classifier__max_depth': 20, 'classifier__min_samples_leaf': 5, 'classifier__min_samples_split': 20, 'classifier__n_estimators': 500}	57	standard	nca	extra_trees	0.0231599
2416791189	0.0206218	0.397315	0.029325	0.406583	0.0402077	{'classifier__max_depth': 20, 'classifier__min_samples_leaf': 10, 'classifier__min_samples_split': 2, 'classifier__n_estimators': 100}	88	standard	nca	extra_trees	0.00926714
2476742368	0.0311071	0.396626	0.0207839	0.405166	0.0338936	{'classifier__max_depth': 20, 'classifier__min_samples_leaf': 10, 'classifier__min_samples_split': 2, 'classifier__n_estimators': 200}	90	standard	nca	extra_trees	0.00853975
2509471228	0.047635	0.400667	0.0268037	0.408382	0.0386574	{'classifier__max_depth': 20, 'classifier__min_samples_leaf': 10, 'classifier__min_samples_split': 2, 'classifier__n_estimators': 300}	82	standard	nca	extra_trees	0.00771556
2546531703	0.0712052	0.398662	0.0305204	0.404265	0.0354409	{'classifier__max_depth': 20, 'classifier__min_samples_leaf': 10, 'classifier__min_samples_split': 2, 'classifier__n_estimators': 500}	83	standard	nca	extra_trees	0.00560259
242077971	0.0213016	0.391937	0.0186217	0.399176	0.0299631	{'classifier__max_depth': 20, 'classifier__min_samples_leaf': 10, 'classifier__min_samples_split': 10, 'classifier__n_estimators': 100}	100	standard	nca	extra_trees	0.00723868
247441438	0.0348635	0.387874	0.0143003	0.39192	0.0181512	{'classifier__max_depth': 20, 'classifier__min_samples_leaf': 10, 'classifier__min_samples_split': 10, 'classifier__n_estimators': 200}	108	standard	nca	extra_trees	0.00404619
2497303061	0.0525983	0.393261	0.0236387	0.398355	0.030433	{'classifier__max_depth': 20, 'classifier__min_samples_leaf': 10, 'classifier__min_samples_split': 10, 'classifier__n_estimators': 300}	99	standard	nca	extra_trees	0.00509404
2513530378	0.0726064	0.394617	0.0245704	0.400823	0.0325549	{'classifier__max_depth': 20, 'classifier__min_samples_leaf': 10, 'classifier__min_samples_split': 10, 'classifier__n_estimators': 500}	96	standard	nca	extra_trees	0.00620586
2441873865	0.022604	0.403406	0.0389648	0.407181	0.0402694	{'classifier__max_depth': 20, 'classifier__min_samples_leaf': 10, 'classifier__min_samples_split': 20, 'classifier__n_estimators': 100}	75	standard	nca	extra_trees	0.00377517
2468449228	0.0331989	0.404703	0.0353864	0.413843	0.0435372	{'classifier__max_depth': 20, 'classifier__min_samples_leaf': 10, 'classifier__min_samples_split': 20, 'classifier__n_estimators': 200}	74	standard	nca	extra_trees	0.00914036
2288338902	0.0267016	0.395279	0.0243031	0.400526	0.033883	{'classifier__max_depth': 20, 'classifier__min_samples_leaf': 10, 'classifier__min_samples_split': 20, 'classifier__n_estimators': 300}	94	standard	nca	extra_trees	0.0052464
1656261537	0.0253002	0.39732	0.0278125	0.402469	0.0333399	{'classifier__max_depth': 20, 'classifier__min_samples_leaf': 10, 'classifier__min_samples_split': 20, 'classifier__n_estimators': 500}	87	standard	nca	extra_trees	0.00514891
2563614576	0.0116033	0.543411	0.022311	0.57127	0.0129345	{'classifier__alpha': 0.0001, 'classifier__hidden_layer_sizes': (100,)}	8	standard	nca	mlp	0.0278592
2494427824	0.0111032	0.552812	0.027933	0.580399	0.00950246	{'classifier__alpha': 0.001, 'classifier__hidden_layer_sizes': (50,)}	2	standard	nca	mlp	0.0275872
2536061764	0.0101998	0.552807	0.0236196	0.577704	0.0119356	{'classifier__alpha': 0.001, 'classifier__hidden_layer_sizes': (50, 50)}	4	standard	nca	mlp	0.0248972
2511781778	0.00909977	0.552812	0.0208389	0.579422	0.0107701	{'classifier__alpha': 0.01, 'classifier__hidden_layer_sizes': (50,)}	2	standard	nca	mlp	0.0266106
0.2756	0.0159023	0.502358	0.0223211	0.494725	0.0175919	{}	1	yeo-johnson	lle	lda	-0.0076333
152436604	0.00860047	0.378455	0.00297985	0.379948	0.00275122	{'classifier__C': 0.1, 'classifier__gamma': 'scale'}	5	robust	pca	svm_linear	0.00149215
1524867438	0.00860062	0.378455	0.00297985	0.379948	0.00275122	{'classifier__C': 0.1, 'classifier__gamma': 'auto'}	5	robust	pca	svm_linear	0.00149215
0.227163	0.0512007	0.490903	0.0106606	0.494501	0.0030295	{'classifier__C': 10, 'classifier__gamma': 'scale'}	1	minmax	truncatedsvd	svm_rbf	0.00359768
2.91493	0.00480001	0.492246	0.014455	0.493677	0.00319448	{'classifier__alpha': 0.01, 'classifier__hidden_layer_sizes': (50, 50)}	1	minmax	truncatedsvd	mlp	0.00143187
8.88033	0.031819	0.480111	0.0193731	0.491882	0.0228723	{'classifier__alpha': 0.0001, 'classifier__hidden_layer_sizes': (50, 50)}	1	minmax	modified_lle	mlp	0.0117711
0.997706	0.0192	0.493588	0.0168296	0.491731	0.0077805	{'classifier__C': 10, 'classifier__penalty': 'l2', 'classifier__solver': 'liblinear'}	1	minmax	isomap	logistic_regression	-0.00185652
0.126412	0.0298433	0.376433	0.0020013	0.376431	0.000221608	{'classifier__C': 0.1, 'classifier__gamma': 'scale'}	4	robust	pca	svm_rbf	-1.976e-06
0.251029	0.0318998	0.376433	0.0020013	0.376431	0.000221608	{'classifier__C': 0.1, 'classifier__gamma': 'auto'}	4	robust	pca	svm_rbf	-1.976e-06
0.157885	0.0292001	0.377109	0.00444427	0.383839	0.00457914	{'classifier__C': 1, 'classifier__gamma': 'scale'}	3	robust	pca	svm_rbf	0.00672995
0.286124	0.0285009	0.377771	0.0093848	0.389525	0.00375695	{'classifier__C': 10, 'classifier__gamma': 'scale'}	2	robust	pca	svm_rbf	0.0117539
0.103098	0.0119005	0.363618	0.0232477	0.366108	0.012531	{'classifier__C': 0.1, 'classifier__gamma': 'scale'}	2	robust	pca	svm_sigmoid	0.00248984
0.018494	0.00552721	0.480115	0.0177186	0.491433	0.00368902	{}	1	minmax	truncatedsvd	gaussian_nb	0.0113179
0.1145	0.0118002	0.325898	0.0199724	0.328922	0.0170984	{'classifier__C': 1, 'classifier__gamma': 'scale'}	4	robust	pca	svm_sigmoid	0.00302367
0.119699	0.0131009	0.330011	0.0352642	0.316868	0.0361792	{'classifier__C': 1, 'classifier__gamma': 'auto'}	3	robust	pca	svm_sigmoid	-0.0131425
0.110498	0.011601	0.311074	0.0242545	0.309466	0.0102172	{'classifier__C': 10, 'classifier__gamma': 'scale'}	5	robust	pca	svm_sigmoid	-0.00160815
0.1057	0.0103994	0.302403	0.034212	0.290903	0.0306281	{'classifier__C': 10, 'classifier__gamma': 'auto'}	6	robust	pca	svm_sigmoid	-0.0115007
0.0246005	0.00470107	0.373068	0.0101627	0.380171	0.00379395	{'classifier__C': 0.1, 'classifier__penalty': 'l1', 'classifier__solver': 'liblinear'}	2	robust	pca	logistic_regression	0.00710319
0.0859025	0.0238014	0.485507	0.0236876	0.491433	0.00385333	{}	1	quantile-normal	pca	lda	0.00592565
0.0279993	0.0047009	0.373068	0.0101627	0.379947	0.00414547	{'classifier__C': 1, 'classifier__penalty': 'l1', 'classifier__solver': 'liblinear'}	2	robust	pca	logistic_regression	0.0068788
0.0306991	0.00410075	0.373068	0.0101627	0.379947	0.00414028	{'classifier__C': 1, 'classifier__penalty': 'l2', 'classifier__solver': 'liblinear'}	2	robust	pca	logistic_regression	0.00687875
0.0261999	0.00390003	0.373068	0.0101627	0.380022	0.00417854	{'classifier__C': 10, 'classifier__penalty': 'l1', 'classifier__solver': 'liblinear'}	2	robust	pca	logistic_regression	0.0069536
0.0263571	0.00324922	0.373068	0.0101627	0.379947	0.00414028	{'classifier__C': 10, 'classifier__penalty': 'l2', 'classifier__solver': 'liblinear'}	2	robust	pca	logistic_regression	0.00687875
0.107703	0.0251002	0.485507	0.0236876	0.491433	0.00385333	{}	1	quantile-normal	ica	lda	0.00592565
0.0170999	0.00340042	0.360892	0.0419485	0.369552	0.0358968	{}	1	robust	pca	gaussian_nb	0.00865984
0.020899	0.00410149	0.389239	0.0204261	0.418853	0.0124323	{'classifier__max_depth': 5, 'classifier__min_samples_leaf': 1, 'classifier__min_samples_split': 10}	5	robust	pca	decision_tree	0.029614
0.0227989	0.00440068	0.38991	0.0193787	0.417282	0.0115134	{'classifier__max_depth': 5, 'classifier__min_samples_leaf': 1, 'classifier__min_samples_split': 20}	4	robust	pca	decision_tree	0.0273716
0.0227983	0.00350027	0.390577	0.02139	0.417057	0.0113522	{'classifier__max_depth': 5, 'classifier__min_samples_leaf': 5, 'classifier__min_samples_split': 2}	2	robust	pca	decision_tree	0.0264805
0.0182983	0.00330055	0.390577	0.02139	0.417057	0.0113522	{'classifier__max_depth': 5, 'classifier__min_samples_leaf': 5, 'classifier__min_samples_split': 10}	2	robust	pca	decision_tree	0.0264805
0.0869009	0.0234	0.485507	0.0236876	0.491433	0.00385333	{}	1	quantile-normal	truncatedsvd	lda	0.00592565
0.0260992	0.00460041	0.387212	0.0208286	0.414289	0.0115703	{'classifier__max_depth': 5, 'classifier__min_samples_leaf': 10, 'classifier__min_samples_split': 2}	7	robust	pca	decision_tree	0.0270771
0.0265001	0.00429983	0.387212	0.0208286	0.414289	0.0115703	{'classifier__max_depth': 5, 'classifier__min_samples_leaf': 10, 'classifier__min_samples_split': 10}	7	robust	pca	decision_tree	0.0270771
0.0236007	0.00369933	0.387212	0.0208286	0.414289	0.0115703	{'classifier__max_depth': 5, 'classifier__min_samples_leaf': 10, 'classifier__min_samples_split': 20}	7	robust	pca	decision_tree	0.0270771
0.1732	0.0129005	0.376433	0.0020013	0.376431	0.000221608	{'classifier__max_depth': None, 'classifier__min_samples_leaf': 5, 'classifier__min_samples_split': 2, 'classifier__n_estimators': 100}	28	robust	pca	extra_trees	-1.976e-06
0.306069	0.0206002	0.376433	0.0020013	0.376431	0.000221608	{'classifier__max_depth': None, 'classifier__min_samples_leaf': 5, 'classifier__min_samples_split': 2, 'classifier__n_estimators': 200}	28	robust	pca	extra_trees	-1.976e-06
0.447768	0.0274	0.376433	0.0020013	0.376431	0.000221608	{'classifier__max_depth': None, 'classifier__min_samples_leaf': 5, 'classifier__min_samples_split': 2, 'classifier__n_estimators': 300}	28	robust	pca	extra_trees	-1.976e-06
0.736	0.0427999	0.376433	0.0020013	0.376431	0.000221608	{'classifier__max_depth': None, 'classifier__min_samples_leaf': 5, 'classifier__min_samples_split': 2, 'classifier__n_estimators': 500}	28	robust	pca	extra_trees	-1.976e-06
0.1705	0.0130001	0.376433	0.0020013	0.376431	0.000221608	{'classifier__max_depth': None, 'classifier__min_samples_leaf': 5, 'classifier__min_samples_split': 10, 'classifier__n_estimators': 100}	28	robust	pca	extra_trees	-1.976e-06
0.3081	0.0199002	0.376433	0.0020013	0.376431	0.000221608	{'classifier__max_depth': None, 'classifier__min_samples_leaf': 5, 'classifier__min_samples_split': 10, 'classifier__n_estimators': 200}	28	robust	pca	extra_trees	-1.976e-06
0.464501	0.0277997	0.376433	0.0020013	0.376431	0.000221608	{'classifier__max_depth': None, 'classifier__min_samples_leaf': 5, 'classifier__min_samples_split': 10, 'classifier__n_estimators': 300}	28	robust	pca	extra_trees	-1.976e-06
0.749155	0.0432998	0.376433	0.0020013	0.376431	0.000221608	{'classifier__max_depth': None, 'classifier__min_samples_leaf': 5, 'classifier__min_samples_split': 10, 'classifier__n_estimators': 500}	28	robust	pca	extra_trees	-1.976e-06
0.170784	0.0131001	0.376433	0.0020013	0.376431	0.000221608	{'classifier__max_depth': None, 'classifier__min_samples_leaf': 5, 'classifier__min_samples_split': 20, 'classifier__n_estimators': 100}	28	robust	pca	extra_trees	-1.976e-06
0.309348	0.0201371	0.376433	0.0020013	0.376431	0.000221608	{'classifier__max_depth': None, 'classifier__min_samples_leaf': 5, 'classifier__min_samples_split': 20, 'classifier__n_estimators': 200}	28	robust	pca	extra_trees	-1.976e-06
0.457171	0.0282003	0.376433	0.0020013	0.376431	0.000221608	{'classifier__max_depth': None, 'classifier__min_samples_leaf': 5, 'classifier__min_samples_split': 20, 'classifier__n_estimators': 300}	28	robust	pca	extra_trees	-1.976e-06
0.76513	0.0432338	0.376433	0.0020013	0.376431	0.000221608	{'classifier__max_depth': None, 'classifier__min_samples_leaf': 5, 'classifier__min_samples_split': 20, 'classifier__n_estimators': 500}	28	robust	pca	extra_trees	-1.976e-06
0.173297	0.0133999	0.376433	0.0020013	0.376431	0.000221608	{'classifier__max_depth': None, 'classifier__min_samples_leaf': 10, 'classifier__min_samples_split': 2, 'classifier__n_estimators': 100}	28	robust	pca	extra_trees	-1.976e-06
0.326017	0.0211998	0.376433	0.0020013	0.376431	0.000221608	{'classifier__max_depth': None, 'classifier__min_samples_leaf': 10, 'classifier__min_samples_split': 2, 'classifier__n_estimators': 200}	28	robust	pca	extra_trees	-1.976e-06
0.448153	0.0281992	0.376433	0.0020013	0.376431	0.000221608	{'classifier__max_depth': None, 'classifier__min_samples_leaf': 10, 'classifier__min_samples_split': 2, 'classifier__n_estimators': 300}	28	robust	pca	extra_trees	-1.976e-06
0.7402	0.0427999	0.376433	0.0020013	0.376431	0.000221608	{'classifier__max_depth': None, 'classifier__min_samples_leaf': 10, 'classifier__min_samples_split': 2, 'classifier__n_estimators': 500}	28	robust	pca	extra_trees	-1.976e-06
0.1686	0.0131006	0.376433	0.0020013	0.376431	0.000221608	{'classifier__max_depth': None, 'classifier__min_samples_leaf': 10, 'classifier__min_samples_split': 10, 'classifier__n_estimators': 100}	28	robust	pca	extra_trees	-1.976e-06
0.309	0.0197999	0.376433	0.0020013	0.376431	0.000221608	{'classifier__max_depth': None, 'classifier__min_samples_leaf': 10, 'classifier__min_samples_split': 10, 'classifier__n_estimators': 200}	28	robust	pca	extra_trees	-1.976e-06
0.451	0.0270001	0.376433	0.0020013	0.376431	0.000221608	{'classifier__max_depth': None, 'classifier__min_samples_leaf': 10, 'classifier__min_samples_split': 10, 'classifier__n_estimators': 300}	28	robust	pca	extra_trees	-1.976e-06
0.740961	0.0465995	0.376433	0.0020013	0.376431	0.000221608	{'classifier__max_depth': None, 'classifier__min_samples_leaf': 10, 'classifier__min_samples_split': 10, 'classifier__n_estimators': 500}	28	robust	pca	extra_trees	-1.976e-06
0.171716	0.0127994	0.376433	0.0020013	0.376431	0.000221608	{'classifier__max_depth': None, 'classifier__min_samples_leaf': 10, 'classifier__min_samples_split': 20, 'classifier__n_estimators': 100}	28	robust	pca	extra_trees	-1.976e-06
0.31026	0.0199	0.376433	0.0020013	0.376431	0.000221608	{'classifier__max_depth': None, 'classifier__min_samples_leaf': 10, 'classifier__min_samples_split': 20, 'classifier__n_estimators': 200}	28	robust	pca	extra_trees	-1.976e-06
0.458733	0.0284792	0.376433	0.0020013	0.376431	0.000221608	{'classifier__max_depth': None, 'classifier__min_samples_leaf': 10, 'classifier__min_samples_split': 20, 'classifier__n_estimators': 300}	28	robust	pca	extra_trees	-1.976e-06
0.734267	0.0426999	0.376433	0.0020013	0.376431	0.000221608	{'classifier__max_depth': None, 'classifier__min_samples_leaf': 10, 'classifier__min_samples_split': 20, 'classifier__n_estimators': 500}	28	robust	pca	extra_trees	-1.976e-06
0.193169	0.0137997	0.383843	0.0100867	0.411971	0.00780028	{'classifier__max_depth': 10, 'classifier__min_samples_leaf': 1, 'classifier__min_samples_split': 10, 'classifier__n_estimators': 100}	9	robust	pca	extra_trees	0.0281284
0.341499	0.0218	0.383172	0.0103697	0.412719	0.00779067	{'classifier__max_depth': 10, 'classifier__min_samples_leaf': 1, 'classifier__min_samples_split': 10, 'classifier__n_estimators': 200}	11	robust	pca	extra_trees	0.0295474
0.5039	0.0310997	0.383172	0.0103697	0.412869	0.00818109	{'classifier__max_depth': 10, 'classifier__min_samples_leaf': 1, 'classifier__min_samples_split': 10, 'classifier__n_estimators': 300}	11	robust	pca	extra_trees	0.0296973
0.822852	0.0480165	0.3825	0.0101691	0.412495	0.00791549	{'classifier__max_depth': 10, 'classifier__min_samples_leaf': 1, 'classifier__min_samples_split': 10, 'classifier__n_estimators': 500}	16	robust	pca	extra_trees	0.0299941
0.182001	0.0134011	0.383167	0.00974545	0.404339	0.00541702	{'classifier__max_depth': 10, 'classifier__min_samples_leaf': 1, 'classifier__min_samples_split': 20, 'classifier__n_estimators': 100}	15	robust	pca	extra_trees	0.0211721
0.339784	0.0230172	0.383172	0.0103697	0.404638	0.00622828	{'classifier__max_depth': 10, 'classifier__min_samples_leaf': 1, 'classifier__min_samples_split': 20, 'classifier__n_estimators': 200}	11	robust	pca	extra_trees	0.0214664
0.494684	0.0308006	0.383847	0.00932206	0.403591	0.00542103	{'classifier__max_depth': 10, 'classifier__min_samples_leaf': 1, 'classifier__min_samples_split': 20, 'classifier__n_estimators': 300}	8	robust	pca	extra_trees	0.0197434
0.812099	0.0498641	0.383172	0.0103697	0.404339	0.00566968	{'classifier__max_depth': 10, 'classifier__min_samples_leaf': 1, 'classifier__min_samples_split': 20, 'classifier__n_estimators': 500}	11	robust	pca	extra_trees	0.0211675
0.1661	0.0132002	0.376433	0.0020013	0.376431	0.000221608	{'classifier__max_depth': 10, 'classifier__min_samples_leaf': 5, 'classifier__min_samples_split': 2, 'classifier__n_estimators': 100}	28	robust	pca	extra_trees	-1.976e-06
0.310299	0.0204	0.376433	0.0020013	0.376431	0.000221608	{'classifier__max_depth': 10, 'classifier__min_samples_leaf': 5, 'classifier__min_samples_split': 2, 'classifier__n_estimators': 200}	28	robust	pca	extra_trees	-1.976e-06
0.44776	0.0274997	0.376433	0.0020013	0.376431	0.000221608	{'classifier__max_depth': 10, 'classifier__min_samples_leaf': 5, 'classifier__min_samples_split': 2, 'classifier__n_estimators': 300}	28	robust	pca	extra_trees	-1.976e-06
0.743981	0.0419997	0.376433	0.0020013	0.376431	0.000221608	{'classifier__max_depth': 10, 'classifier__min_samples_leaf': 5, 'classifier__min_samples_split': 2, 'classifier__n_estimators': 500}	28	robust	pca	extra_trees	-1.976e-06
0.1701	0.0125998	0.376433	0.0020013	0.376431	0.000221608	{'classifier__max_depth': 10, 'classifier__min_samples_leaf': 5, 'classifier__min_samples_split': 10, 'classifier__n_estimators': 100}	28	robust	pca	extra_trees	-1.976e-06
0.311601	0.0204002	0.376433	0.0020013	0.376431	0.000221608	{'classifier__max_depth': 10, 'classifier__min_samples_leaf': 5, 'classifier__min_samples_split': 10, 'classifier__n_estimators': 200}	28	robust	pca	extra_trees	-1.976e-06
0.4506	0.0275998	0.376433	0.0020013	0.376431	0.000221608	{'classifier__max_depth': 10, 'classifier__min_samples_leaf': 5, 'classifier__min_samples_split': 10, 'classifier__n_estimators': 300}	28	robust	pca	extra_trees	-1.976e-06
0.74708	0.0435999	0.376433	0.0020013	0.376431	0.000221608	{'classifier__max_depth': 10, 'classifier__min_samples_leaf': 5, 'classifier__min_samples_split': 10, 'classifier__n_estimators': 500}	28	robust	pca	extra_trees	-1.976e-06
0.168	0.0130002	0.376433	0.0020013	0.376431	0.000221608	{'classifier__max_depth': 10, 'classifier__min_samples_leaf': 5, 'classifier__min_samples_split': 20, 'classifier__n_estimators': 100}	28	robust	pca	extra_trees	-1.976e-06
0.31158	0.0211001	0.376433	0.0020013	0.376431	0.000221608	{'classifier__max_depth': 10, 'classifier__min_samples_leaf': 5, 'classifier__min_samples_split': 20, 'classifier__n_estimators': 200}	28	robust	pca	extra_trees	-1.976e-06
0.452747	0.0283995	0.376433	0.0020013	0.376431	0.000221608	{'classifier__max_depth': 10, 'classifier__min_samples_leaf': 5, 'classifier__min_samples_split': 20, 'classifier__n_estimators': 300}	28	robust	pca	extra_trees	-1.976e-06
0.754776	0.0442993	0.376433	0.0020013	0.376431	0.000221608	{'classifier__max_depth': 10, 'classifier__min_samples_leaf': 5, 'classifier__min_samples_split': 20, 'classifier__n_estimators': 500}	28	robust	pca	extra_trees	-1.976e-06
0.166818	0.0129997	0.376433	0.0020013	0.376431	0.000221608	{'classifier__max_depth': 10, 'classifier__min_samples_leaf': 10, 'classifier__min_samples_split': 2, 'classifier__n_estimators': 100}	28	robust	pca	extra_trees	-1.976e-06
0.3078	0.0204999	0.376433	0.0020013	0.376431	0.000221608	{'classifier__max_depth': 10, 'classifier__min_samples_leaf': 10, 'classifier__min_samples_split': 2, 'classifier__n_estimators': 200}	28	robust	pca	extra_trees	-1.976e-06
0.451199	0.0288001	0.376433	0.0020013	0.376431	0.000221608	{'classifier__max_depth': 10, 'classifier__min_samples_leaf': 10, 'classifier__min_samples_split': 2, 'classifier__n_estimators': 300}	28	robust	pca	extra_trees	-1.976e-06
0.737866	0.0445996	0.376433	0.0020013	0.376431	0.000221608	{'classifier__max_depth': 10, 'classifier__min_samples_leaf': 10, 'classifier__min_samples_split': 2, 'classifier__n_estimators': 500}	28	robust	pca	extra_trees	-1.976e-06
0.168511	0.0131218	0.376433	0.0020013	0.376431	0.000221608	{'classifier__max_depth': 10, 'classifier__min_samples_leaf': 10, 'classifier__min_samples_split': 10, 'classifier__n_estimators': 100}	28	robust	pca	extra_trees	-1.976e-06
0.3098	0.0215003	0.376433	0.0020013	0.376431	0.000221608	{'classifier__max_depth': 10, 'classifier__min_samples_leaf': 10, 'classifier__min_samples_split': 10, 'classifier__n_estimators': 200}	28	robust	pca	extra_trees	-1.976e-06
0.447299	0.0280998	0.376433	0.0020013	0.376431	0.000221608	{'classifier__max_depth': 10, 'classifier__min_samples_leaf': 10, 'classifier__min_samples_split': 10, 'classifier__n_estimators': 300}	28	robust	pca	extra_trees	-1.976e-06
0.745319	0.0435712	0.376433	0.0020013	0.376431	0.000221608	{'classifier__max_depth': 10, 'classifier__min_samples_leaf': 10, 'classifier__min_samples_split': 10, 'classifier__n_estimators': 500}	28	robust	pca	extra_trees	-1.976e-06
0.1678	0.0131001	0.376433	0.0020013	0.376431	0.000221608	{'classifier__max_depth': 10, 'classifier__min_samples_leaf': 10, 'classifier__min_samples_split': 20, 'classifier__n_estimators': 100}	28	robust	pca	extra_trees	-1.976e-06
0.3097	0.0205002	0.376433	0.0020013	0.376431	0.000221608	{'classifier__max_depth': 10, 'classifier__min_samples_leaf': 10, 'classifier__min_samples_split': 20, 'classifier__n_estimators': 200}	28	robust	pca	extra_trees	-1.976e-06
0.449463	0.0280002	0.376433	0.0020013	0.376431	0.000221608	{'classifier__max_depth': 10, 'classifier__min_samples_leaf': 10, 'classifier__min_samples_split': 20, 'classifier__n_estimators': 300}	28	robust	pca	extra_trees	-1.976e-06
0.7287	0.0418997	0.376433	0.0020013	0.376431	0.000221608	{'classifier__max_depth': 10, 'classifier__min_samples_leaf': 10, 'classifier__min_samples_split': 20, 'classifier__n_estimators': 500}	28	robust	pca	extra_trees	-1.976e-06
0.1678	0.0129	0.376433	0.0020013	0.376431	0.000221608	{'classifier__max_depth': 20, 'classifier__min_samples_leaf': 5, 'classifier__min_samples_split': 2, 'classifier__n_estimators': 100}	28	robust	pca	extra_trees	-1.976e-06
0.312283	0.0205002	0.376433	0.0020013	0.376431	0.000221608	{'classifier__max_depth': 20, 'classifier__min_samples_leaf': 5, 'classifier__min_samples_split': 2, 'classifier__n_estimators': 200}	28	robust	pca	extra_trees	-1.976e-06
0.454656	0.0282989	0.376433	0.0020013	0.376431	0.000221608	{'classifier__max_depth': 20, 'classifier__min_samples_leaf': 5, 'classifier__min_samples_split': 2, 'classifier__n_estimators': 300}	28	robust	pca	extra_trees	-1.976e-06
0.746899	0.0427005	0.376433	0.0020013	0.376431	0.000221608	{'classifier__max_depth': 20, 'classifier__min_samples_leaf': 5, 'classifier__min_samples_split': 2, 'classifier__n_estimators': 500}	28	robust	pca	extra_trees	-1.976e-06
0.1783	0.0127001	0.376433	0.0020013	0.376431	0.000221608	{'classifier__max_depth': 20, 'classifier__min_samples_leaf': 5, 'classifier__min_samples_split': 10, 'classifier__n_estimators': 100}	28	robust	pca	extra_trees	-1.976e-06
0.3102	0.0208004	0.376433	0.0020013	0.376431	0.000221608	{'classifier__max_depth': 20, 'classifier__min_samples_leaf': 5, 'classifier__min_samples_split': 10, 'classifier__n_estimators': 200}	28	robust	pca	extra_trees	-1.976e-06
0.4544	0.0298003	0.376433	0.0020013	0.376431	0.000221608	{'classifier__max_depth': 20, 'classifier__min_samples_leaf': 5, 'classifier__min_samples_split': 10, 'classifier__n_estimators': 300}	28	robust	pca	extra_trees	-1.976e-06
0.7505	0.0435006	0.376433	0.0020013	0.376431	0.000221608	{'classifier__max_depth': 20, 'classifier__min_samples_leaf': 5, 'classifier__min_samples_split': 10, 'classifier__n_estimators': 500}	28	robust	pca	extra_trees	-1.976e-06
0.1715	0.0134003	0.376433	0.0020013	0.376431	0.000221608	{'classifier__max_depth': 20, 'classifier__min_samples_leaf': 5, 'classifier__min_samples_split': 20, 'classifier__n_estimators': 100}	28	robust	pca	extra_trees	-1.976e-06
0.3093	0.0202993	0.376433	0.0020013	0.376431	0.000221608	{'classifier__max_depth': 20, 'classifier__min_samples_leaf': 5, 'classifier__min_samples_split': 20, 'classifier__n_estimators': 200}	28	robust	pca	extra_trees	-1.976e-06
0.4659	0.0290999	0.376433	0.0020013	0.376431	0.000221608	{'classifier__max_depth': 20, 'classifier__min_samples_leaf': 5, 'classifier__min_samples_split': 20, 'classifier__n_estimators': 300}	28	robust	pca	extra_trees	-1.976e-06
0.7445	0.0440005	0.376433	0.0020013	0.376431	0.000221608	{'classifier__max_depth': 20, 'classifier__min_samples_leaf': 5, 'classifier__min_samples_split': 20, 'classifier__n_estimators': 500}	28	robust	pca	extra_trees	-1.976e-06
0.1735	0.0133999	0.376433	0.0020013	0.376431	0.000221608	{'classifier__max_depth': 20, 'classifier__min_samples_leaf': 10, 'classifier__min_samples_split': 2, 'classifier__n_estimators': 100}	28	robust	pca	extra_trees	-1.976e-06
0.3145	0.0215	0.376433	0.0020013	0.376431	0.000221608	{'classifier__max_depth': 20, 'classifier__min_samples_leaf': 10, 'classifier__min_samples_split': 2, 'classifier__n_estimators': 200}	28	robust	pca	extra_trees	-1.976e-06
0.453797	0.0292004	0.376433	0.0020013	0.376431	0.000221608	{'classifier__max_depth': 20, 'classifier__min_samples_leaf': 10, 'classifier__min_samples_split': 2, 'classifier__n_estimators': 300}	28	robust	pca	extra_trees	-1.976e-06
0.786035	0.0437085	0.376433	0.0020013	0.376431	0.000221608	{'classifier__max_depth': 20, 'classifier__min_samples_leaf': 10, 'classifier__min_samples_split': 2, 'classifier__n_estimators': 500}	28	robust	pca	extra_trees	-1.976e-06
0.164465	0.0131	0.376433	0.0020013	0.376431	0.000221608	{'classifier__max_depth': 20, 'classifier__min_samples_leaf': 10, 'classifier__min_samples_split': 10, 'classifier__n_estimators': 100}	28	robust	pca	extra_trees	-1.976e-06
0.314436	0.0222363	0.376433	0.0020013	0.376431	0.000221608	{'classifier__max_depth': 20, 'classifier__min_samples_leaf': 10, 'classifier__min_samples_split': 10, 'classifier__n_estimators': 200}	28	robust	pca	extra_trees	-1.976e-06
0.45772	0.032501	0.376433	0.0020013	0.376431	0.000221608	{'classifier__max_depth': 20, 'classifier__min_samples_leaf': 10, 'classifier__min_samples_split': 10, 'classifier__n_estimators': 300}	28	robust	pca	extra_trees	-1.976e-06
0.751261	0.0428003	0.376433	0.0020013	0.376431	0.000221608	{'classifier__max_depth': 20, 'classifier__min_samples_leaf': 10, 'classifier__min_samples_split': 10, 'classifier__n_estimators': 500}	28	robust	pca	extra_trees	-1.976e-06
0.172396	0.0128005	0.376433	0.0020013	0.376431	0.000221608	{'classifier__max_depth': 20, 'classifier__min_samples_leaf': 10, 'classifier__min_samples_split': 20, 'classifier__n_estimators': 100}	28	robust	pca	extra_trees	-1.976e-06
0.3079	0.0206998	0.376433	0.0020013	0.376431	0.000221608	{'classifier__max_depth': 20, 'classifier__min_samples_leaf': 10, 'classifier__min_samples_split': 20, 'classifier__n_estimators': 200}	28	robust	pca	extra_trees	-1.976e-06
0.4251	0.0258003	0.376433	0.0020013	0.376431	0.000221608	{'classifier__max_depth': 20, 'classifier__min_samples_leaf': 10, 'classifier__min_samples_split': 20, 'classifier__n_estimators': 300}	28	robust	pca	extra_trees	-1.976e-06
0.570598	0.0234999	0.376433	0.0020013	0.376431	0.000221608	{'classifier__max_depth': 20, 'classifier__min_samples_leaf': 10, 'classifier__min_samples_split': 20, 'classifier__n_estimators': 500}	28	robust	pca	extra_trees	-1.976e-06
2613013005	0.00520022	0.373068	0.00761532	0.392968	0.00982042	{'classifier__alpha': 0.0001, 'classifier__hidden_layer_sizes': (50,)}	9	robust	pca	mlp	0.0198993
2762613201	0.00530009	0.373077	0.00909283	0.394914	0.0116506	{'classifier__alpha': 0.0001, 'classifier__hidden_layer_sizes': (100,)}	8	robust	pca	mlp	0.0218366
0.962814	0.0126003	0.492246	0.0112918	0.490909	0.00214193	{'classifier__C': 1, 'classifier__gamma': 'auto'}	1	minmax	truncatedsvd	svm_poly	-0.0013363
2730990219	0.00519977	0.378451	0.00571669	0.394688	0.0102156	{'classifier__alpha': 0.001, 'classifier__hidden_layer_sizes': (50,)}	3	robust	pca	mlp	0.0162375
2534108996	0.00539954	0.375095	0.00586905	0.393641	0.010291	{'classifier__alpha': 0.001, 'classifier__hidden_layer_sizes': (100,)}	7	robust	pca	mlp	0.018546
2634886312	0.00510013	0.381167	0.0164882	0.405537	0.0183562	{'classifier__alpha': 0.001, 'classifier__hidden_layer_sizes': (50, 50)}	2	robust	pca	mlp	0.0243702
2410852599	0.0049005	0.376433	0.00635658	0.393342	0.0119541	{'classifier__alpha': 0.01, 'classifier__hidden_layer_sizes': (50,)}	5	robust	pca	mlp	0.0169092
2300679588	0.00420031	0.376428	0.00676795	0.394015	0.00995377	{'classifier__alpha': 0.01, 'classifier__hidden_layer_sizes': (100,)}	6	robust	pca	mlp	0.0175863
1661080265	0.00389993	0.377771	0.00937178	0.398954	0.0148168	{'classifier__alpha': 0.01, 'classifier__hidden_layer_sizes': (50, 50)}	4	robust	pca	mlp	0.0211829
0.040102	0.00939989	0.614167	0.0234732	0.623119	0.0091819	{'classifier__C': 0.1, 'classifier__gamma': 'scale'}	5	robust	lda	svm_linear	0.00895282
0.0504973	0.00880134	0.614167	0.0234732	0.623119	0.0091819	{'classifier__C': 0.1, 'classifier__gamma': 'auto'}	5	robust	lda	svm_linear	0.00895282
0.0529008	0.00869949	0.616157	0.0240843	0.633819	0.0066749	{'classifier__C': 1, 'classifier__gamma': 'scale'}	3	robust	lda	svm_linear	0.0176615
0.0524002	0.00859935	0.616157	0.0240843	0.633819	0.0066749	{'classifier__C': 1, 'classifier__gamma': 'auto'}	3	robust	lda	svm_linear	0.0176615
0.0767967	0.00830157	0.620184	0.0259488	0.634193	0.00714232	{'classifier__C': 10, 'classifier__gamma': 'scale'}	1	robust	lda	svm_linear	0.0140089
0.0715992	0.00669951	0.620184	0.0259488	0.634193	0.00714232	{'classifier__C': 10, 'classifier__gamma': 'auto'}	1	robust	lda	svm_linear	0.0140089
0.0758986	0.0243006	0.59128	0.0238044	0.596409	0.00263812	{'classifier__C': 0.1, 'classifier__gamma': 'scale'}	6	robust	lda	svm_rbf	0.0051295
0.111896	0.0263996	0.59396	0.0223334	0.605911	0.00363058	{'classifier__C': 0.1, 'classifier__gamma': 'auto'}	5	robust	lda	svm_rbf	0.0119515
0.0788003	0.0224005	0.612811	0.0319542	0.630827	0.00805891	{'classifier__C': 1, 'classifier__gamma': 'scale'}	2	robust	lda	svm_rbf	0.018016
0.095124	0.0230006	0.615473	0.0275308	0.641301	0.0072179	{'classifier__C': 10, 'classifier__gamma': 'scale'}	1	robust	lda	svm_rbf	0.0258281
0.0891011	0.0109	0.48821	0.00758351	0.49061	0.00213214	{'classifier__C': 10, 'classifier__gamma': 'scale'}	1	minmax	truncatedsvd	svm_linear	0.00240021
0.10817	0.013299	0.502381	0.0312785	0.505125	0.0112261	{'classifier__C': 0.1, 'classifier__gamma': 'auto'}	4	robust	lda	svm_sigmoid	0.00274447
0.0731987	0.0112004	0.525277	0.0148819	0.534306	0.00660007	{'classifier__C': 1, 'classifier__gamma': 'scale'}	2	robust	lda	svm_sigmoid	0.00902984
0.0999968	0.0144003	0.438323	0.0309218	0.445941	0.0102076	{'classifier__C': 1, 'classifier__gamma': 'auto'}	5	robust	lda	svm_sigmoid	0.00761784
0.0660995	0.0115008	0.503714	0.0301672	0.504302	0.00928903	{'classifier__C': 10, 'classifier__gamma': 'scale'}	3	robust	lda	svm_sigmoid	0.000588348
0.0755023	0.00980122	0.412112	0.038992	0.428433	0.0100888	{'classifier__C': 10, 'classifier__gamma': 'auto'}	6	robust	lda	svm_sigmoid	0.0163208
0.0382994	0.00420012	0.535412	0.0325115	0.540592	0.0155467	{'classifier__C': 0.1, 'classifier__penalty': 'l1', 'classifier__solver': 'liblinear'}	5	robust	lda	logistic_regression	0.00518023
0.0392988	0.00489979	0.52461	0.0216153	0.53498	0.0120545	{'classifier__C': 0.1, 'classifier__penalty': 'l2', 'classifier__solver': 'liblinear'}	6	robust	lda	logistic_regression	0.0103702
0.0657006	0.00459993	0.550916	0.0381288	0.56072	0.0157909	{'classifier__C': 1, 'classifier__penalty': 'l1', 'classifier__solver': 'liblinear'}	3	robust	lda	logistic_regression	0.00980381
0.0453008	0.00499916	0.547551	0.0406994	0.556455	0.0158862	{'classifier__C': 1, 'classifier__penalty': 'l2', 'classifier__solver': 'liblinear'}	4	robust	lda	logistic_regression	0.00890413
0.0651997	0.00449953	0.552925	0.0342909	0.564311	0.015176	{'classifier__C': 10, 'classifier__penalty': 'l1', 'classifier__solver': 'liblinear'}	1	robust	lda	logistic_regression	0.0113861
0.0440007	0.00409882	0.551583	0.0352715	0.562889	0.0149338	{'classifier__C': 10, 'classifier__penalty': 'l2', 'classifier__solver': 'liblinear'}	2	robust	lda	logistic_regression	0.0113066
0.0227036	0.00320003	0.61213	0.0290164	0.623644	0.00692981	{}	1	robust	lda	lda	0.0115137
0.0230026	0.00359924	0.616162	0.0273414	0.633744	0.00755244	{}	1	robust	lda	gaussian_nb	0.0175825
0.1965	0.0142005	0.504299	0.0356088	0.522345	0.0390986	{'classifier__max_depth': None, 'classifier__min_samples_leaf': 10, 'classifier__min_samples_split': 2, 'classifier__n_estimators': 100}	106	robust	lda	extra_trees	0.0180458
0.332684	0.0221004	0.511759	0.0280762	0.530867	0.0213552	{'classifier__max_depth': None, 'classifier__min_samples_leaf': 10, 'classifier__min_samples_split': 2, 'classifier__n_estimators': 200}	94	robust	lda	extra_trees	0.0191083
0.481072	0.0303	0.51847	0.0337303	0.537904	0.0277844	{'classifier__max_depth': None, 'classifier__min_samples_leaf': 10, 'classifier__min_samples_split': 2, 'classifier__n_estimators': 300}	80	robust	lda	extra_trees	0.0194342
0.809599	0.0442015	0.507673	0.0373804	0.524215	0.0325041	{'classifier__max_depth': None, 'classifier__min_samples_leaf': 10, 'classifier__min_samples_split': 2, 'classifier__n_estimators': 500}	103	robust	lda	extra_trees	0.0165419
0.181501	0.0140998	0.513826	0.0271064	0.535502	0.0227958	{'classifier__max_depth': None, 'classifier__min_samples_leaf': 10, 'classifier__min_samples_split': 10, 'classifier__n_estimators': 100}	88	robust	lda	extra_trees	0.0216757
0.3341	0.0219003	0.521839	0.0273811	0.542096	0.0294294	{'classifier__max_depth': None, 'classifier__min_samples_leaf': 10, 'classifier__min_samples_split': 10, 'classifier__n_estimators': 200}	77	robust	lda	extra_trees	0.0202563
0.484594	0.0295158	0.515155	0.0291604	0.542163	0.0338012	{'classifier__max_depth': None, 'classifier__min_samples_leaf': 10, 'classifier__min_samples_split': 10, 'classifier__n_estimators': 300}	86	robust	lda	extra_trees	0.0270076
0.779157	0.046	0.513822	0.0263817	0.534455	0.012993	{'classifier__max_depth': None, 'classifier__min_samples_leaf': 10, 'classifier__min_samples_split': 10, 'classifier__n_estimators': 500}	89	robust	lda	extra_trees	0.0206333
0.190063	0.0151997	0.525916	0.0362463	0.545308	0.0200702	{'classifier__max_depth': None, 'classifier__min_samples_leaf': 10, 'classifier__min_samples_split': 20, 'classifier__n_estimators': 100}	75	robust	lda	extra_trees	0.0193918
0.3332	0.0227001	0.513772	0.0317584	0.525633	0.0341185	{'classifier__max_depth': None, 'classifier__min_samples_leaf': 10, 'classifier__min_samples_split': 20, 'classifier__n_estimators': 200}	90	robust	lda	extra_trees	0.0118608
0.484378	0.0293999	0.524565	0.0275024	0.545532	0.022393	{'classifier__max_depth': None, 'classifier__min_samples_leaf': 10, 'classifier__min_samples_split': 20, 'classifier__n_estimators': 300}	76	robust	lda	extra_trees	0.0209674
0.776454	0.0440995	0.509065	0.0307158	0.528026	0.0313774	{'classifier__max_depth': None, 'classifier__min_samples_leaf': 10, 'classifier__min_samples_split': 20, 'classifier__n_estimators': 500}	98	robust	lda	extra_trees	0.0189615
0.1882	0.0135	0.509088	0.0230041	0.536926	0.0298912	{'classifier__max_depth': 10, 'classifier__min_samples_leaf': 10, 'classifier__min_samples_split': 2, 'classifier__n_estimators': 100}	97	robust	lda	extra_trees	0.0278383
0.3339	0.0212999	0.525925	0.0239329	0.545457	0.0254389	{'classifier__max_depth': 10, 'classifier__min_samples_leaf': 10, 'classifier__min_samples_split': 2, 'classifier__n_estimators': 200}	74	robust	lda	extra_trees	0.0195316
0.4827	0.0304004	0.501655	0.0314571	0.523387	0.030598	{'classifier__max_depth': 10, 'classifier__min_samples_leaf': 10, 'classifier__min_samples_split': 2, 'classifier__n_estimators': 300}	107	robust	lda	extra_trees	0.0217322
0.787051	0.0458996	0.50843	0.027985	0.526899	0.0279725	{'classifier__max_depth': 10, 'classifier__min_samples_leaf': 10, 'classifier__min_samples_split': 2, 'classifier__n_estimators': 500}	100	robust	lda	extra_trees	0.0184691
0.183801	0.0141998	0.517169	0.0326881	0.542089	0.0179954	{'classifier__max_depth': 10, 'classifier__min_samples_leaf': 10, 'classifier__min_samples_split': 10, 'classifier__n_estimators': 100}	82	robust	lda	extra_trees	0.0249203
0.333601	0.0215333	0.509741	0.0255921	0.532141	0.0290596	{'classifier__max_depth': 10, 'classifier__min_samples_leaf': 10, 'classifier__min_samples_split': 10, 'classifier__n_estimators': 200}	95	robust	lda	extra_trees	0.0224001
0.4846	0.0316002	0.507709	0.0345021	0.521216	0.0283558	{'classifier__max_depth': 10, 'classifier__min_samples_leaf': 10, 'classifier__min_samples_split': 10, 'classifier__n_estimators': 300}	101	robust	lda	extra_trees	0.0135072
0.7893	0.0443004	0.504385	0.0284806	0.523759	0.0293919	{'classifier__max_depth': 10, 'classifier__min_samples_leaf': 10, 'classifier__min_samples_split': 10, 'classifier__n_estimators': 500}	104	robust	lda	extra_trees	0.0193734
0.185	0.0136001	0.499637	0.0353562	0.514484	0.0430703	{'classifier__max_depth': 10, 'classifier__min_samples_leaf': 10, 'classifier__min_samples_split': 20, 'classifier__n_estimators': 100}	108	robust	lda	extra_trees	0.0148472
0.3329	0.0213002	0.504381	0.0314405	0.524357	0.0344192	{'classifier__max_depth': 10, 'classifier__min_samples_leaf': 10, 'classifier__min_samples_split': 20, 'classifier__n_estimators': 200}	105	robust	lda	extra_trees	0.0199767
0.480307	0.0295006	0.512434	0.0258036	0.534013	0.0256387	{'classifier__max_depth': 10, 'classifier__min_samples_leaf': 10, 'classifier__min_samples_split': 20, 'classifier__n_estimators': 300}	91	robust	lda	extra_trees	0.0215786
0.786177	0.0432	0.515808	0.0200027	0.53663	0.0207987	{'classifier__max_depth': 10, 'classifier__min_samples_leaf': 10, 'classifier__min_samples_split': 20, 'classifier__n_estimators': 500}	84	robust	lda	extra_trees	0.0208216
0.186877	0.0133608	0.5077	0.0302857	0.524809	0.0286539	{'classifier__max_depth': 20, 'classifier__min_samples_leaf': 10, 'classifier__min_samples_split': 2, 'classifier__n_estimators': 100}	102	robust	lda	extra_trees	0.0171087
0.332474	0.0212997	0.511759	0.0246622	0.526906	0.0351056	{'classifier__max_depth': 20, 'classifier__min_samples_leaf': 10, 'classifier__min_samples_split': 2, 'classifier__n_estimators': 200}	93	robust	lda	extra_trees	0.0151469
0.48867	0.029399	0.526587	0.0195745	0.542989	0.0264776	{'classifier__max_depth': 20, 'classifier__min_samples_leaf': 10, 'classifier__min_samples_split': 2, 'classifier__n_estimators': 300}	73	robust	lda	extra_trees	0.0164021
0.7977	0.0461001	0.517812	0.0364326	0.535359	0.0366315	{'classifier__max_depth': 20, 'classifier__min_samples_leaf': 10, 'classifier__min_samples_split': 2, 'classifier__n_estimators': 500}	81	robust	lda	extra_trees	0.0175467
0.184799	0.0151005	0.509047	0.0427423	0.533791	0.040917	{'classifier__max_depth': 20, 'classifier__min_samples_leaf': 10, 'classifier__min_samples_split': 10, 'classifier__n_estimators': 100}	99	robust	lda	extra_trees	0.0247439
0.3334	0.0215001	0.515123	0.018499	0.543662	0.0220537	{'classifier__max_depth': 20, 'classifier__min_samples_leaf': 10, 'classifier__min_samples_split': 10, 'classifier__n_estimators': 200}	87	robust	lda	extra_trees	0.0285387
0.4876	0.0305004	0.515781	0.0208666	0.536407	0.0227571	{'classifier__max_depth': 20, 'classifier__min_samples_leaf': 10, 'classifier__min_samples_split': 10, 'classifier__n_estimators': 300}	85	robust	lda	extra_trees	0.020626
0.788701	0.0461007	0.51647	0.0292692	0.539849	0.0295592	{'classifier__max_depth': 20, 'classifier__min_samples_leaf': 10, 'classifier__min_samples_split': 10, 'classifier__n_estimators': 500}	83	robust	lda	extra_trees	0.0233784
0.1831	0.0136999	0.511768	0.0272808	0.535655	0.0302809	{'classifier__max_depth': 20, 'classifier__min_samples_leaf': 10, 'classifier__min_samples_split': 20, 'classifier__n_estimators': 100}	92	robust	lda	extra_trees	0.0238876
0.3291	0.0217006	0.509097	0.0307945	0.527053	0.0238792	{'classifier__max_depth': 20, 'classifier__min_samples_leaf': 10, 'classifier__min_samples_split': 20, 'classifier__n_estimators': 200}	96	robust	lda	extra_trees	0.0179564
0.4566	0.0234003	0.519853	0.0344624	0.537973	0.0231026	{'classifier__max_depth': 20, 'classifier__min_samples_leaf': 10, 'classifier__min_samples_split': 20, 'classifier__n_estimators': 300}	79	robust	lda	extra_trees	0.0181202
0.612801	0.0253986	0.520506	0.0295139	0.539549	0.0289068	{'classifier__max_depth': 20, 'classifier__min_samples_leaf': 10, 'classifier__min_samples_split': 20, 'classifier__n_estimators': 500}	78	robust	lda	extra_trees	0.0190433
3515826941	0.00549977	0.621526	0.0255871	0.647587	0.00806599	{'classifier__alpha': 0.0001, 'classifier__hidden_layer_sizes': (50,)}	4	robust	lda	mlp	0.0260607
3896597648	0.0058995	0.622175	0.0269522	0.649906	0.00794222	{'classifier__alpha': 0.0001, 'classifier__hidden_layer_sizes': (100,)}	3	robust	lda	mlp	0.0277308
0.066398	0.0219004	0.48821	0.00758351	0.49061	0.00213214	{'classifier__C': 10, 'classifier__gamma': 'auto'}	1	minmax	truncatedsvd	svm_linear	0.00240021
3504681373	0.00580092	0.621517	0.0237257	0.647961	0.00979123	{'classifier__alpha': 0.001, 'classifier__hidden_layer_sizes': (100,)}	5	robust	lda	mlp	0.0264434
3026018047	0.00539994	0.622193	0.0238074	0.646016	0.00829478	{'classifier__alpha': 0.01, 'classifier__hidden_layer_sizes': (50,)}	2	robust	lda	mlp	0.0238233
0.0868994	0.00500081	0.487557	0.0166325	0.489712	0.00418395	{'classifier__C': 1, 'classifier__penalty': 'l1', 'classifier__solver': 'liblinear'}	1	minmax	ica	logistic_regression	0.00215495
0.0251005	0.00420137	0.486205	0.0149388	0.489412	0.00379361	{'classifier__C': 10, 'classifier__penalty': 'l2', 'classifier__solver': 'liblinear'}	1	minmax	pca	logistic_regression	0.00320713
0.0966409	0.00939932	0.37778	0.00361836	0.379873	0.0029369	{'classifier__C': 1, 'classifier__gamma': 'scale'}	5	robust	ica	svm_linear	0.00209303
0.0982169	0.00950065	0.37778	0.00361836	0.379873	0.0029369	{'classifier__C': 1, 'classifier__gamma': 'auto'}	5	robust	ica	svm_linear	0.00209303
0.0130007	0.00389981	0.475453	0.0235984	0.481258	0.00441941	{}	1	normalizer	ica	gaussian_nb	0.00580411
0.0194003	0.00459979	0.478124	0.0119673	0.479536	0.00358938	{}	1	minmax	truncatedsvd	lda	0.00141165
0.369234	0.0468997	0.464647	0.0241858	0.478641	0.0202871	{'classifier__C': 10, 'classifier__gamma': 'scale'}	1	normalizer	lle	svm_rbf	0.0139936
0.191946	0.0221008	0.461949	0.0201244	0.478414	0.00279585	{'classifier__C': 10, 'classifier__gamma': 'auto'}	1	quantile-uniform	truncatedsvd	svm_rbf	0.0164652
0.166599	0.0296309	0.375757	0.00380706	0.384363	0.00380188	{'classifier__C': 1, 'classifier__gamma': 'scale'}	3	robust	ica	svm_rbf	0.00860531
0.174061	0.0300931	0.375757	0.00380706	0.384363	0.00380188	{'classifier__C': 1, 'classifier__gamma': 'auto'}	3	robust	ica	svm_rbf	0.00860531
0.345955	0.0278164	0.373726	0.00959791	0.391021	0.00324926	{'classifier__C': 10, 'classifier__gamma': 'scale'}	5	robust	ica	svm_rbf	0.0172952
0.285757	0.0209993	0.373726	0.00959791	0.391021	0.00324926	{'classifier__C': 10, 'classifier__gamma': 'auto'}	5	robust	ica	svm_rbf	0.0172952
0.248999	0.00809994	0.475422	0.0203841	0.477142	0.0030866	{'classifier__C': 10, 'classifier__penalty': 'l1', 'classifier__solver': 'liblinear'}	1	yeo-johnson	ica	logistic_regression	0.00172021
0.108399	0.00660043	0.474075	0.0187567	0.476842	0.00187056	{'classifier__C': 10, 'classifier__penalty': 'l2', 'classifier__solver': 'liblinear'}	1	quantile-uniform	ica	logistic_regression	0.00276729
0.125059	0.0123003	0.33397	0.0325085	0.327501	0.0272702	{'classifier__C': 1, 'classifier__gamma': 'scale'}	3	robust	ica	svm_sigmoid	-0.00646914
0.126899	0.0124994	0.33397	0.0325085	0.327501	0.0272702	{'classifier__C': 1, 'classifier__gamma': 'auto'}	3	robust	ica	svm_sigmoid	-0.00646914
0.118033	0.0127	0.311083	0.0266076	0.313804	0.0065535	{'classifier__C': 10, 'classifier__gamma': 'scale'}	5	robust	ica	svm_sigmoid	0.00272102
0.091234	0.00779932	0.311083	0.0266076	0.313804	0.0065535	{'classifier__C': 10, 'classifier__gamma': 'auto'}	5	robust	ica	svm_sigmoid	0.00272102
0.2443	0.00850048	0.476116	0.0245896	0.476693	0.00303943	{'classifier__C': 1, 'classifier__penalty': 'l2', 'classifier__solver': 'liblinear'}	1	yeo-johnson	pca	logistic_regression	0.000577348
0.0345004	0.0041002	0.371717	0.0102647	0.3786	0.00381232	{'classifier__C': 0.1, 'classifier__penalty': 'l2', 'classifier__solver': 'liblinear'}	6	robust	ica	logistic_regression	0.00688352
0.0344	0.0046	0.372393	0.00905272	0.380321	0.0041701	{'classifier__C': 1, 'classifier__penalty': 'l1', 'classifier__solver': 'liblinear'}	5	robust	ica	logistic_regression	0.00792867
0.0381997	0.00470033	0.373068	0.0101627	0.380097	0.00410241	{'classifier__C': 1, 'classifier__penalty': 'l2', 'classifier__solver': 'liblinear'}	2	robust	ica	logistic_regression	0.00702839
0.0365	0.00449941	0.373068	0.0101627	0.379947	0.00414547	{'classifier__C': 10, 'classifier__penalty': 'l1', 'classifier__solver': 'liblinear'}	2	robust	ica	logistic_regression	0.0068788
0.0366983	0.00359974	0.373068	0.0101627	0.379872	0.00410553	{'classifier__C': 10, 'classifier__penalty': 'l2', 'classifier__solver': 'liblinear'}	2	robust	ica	logistic_regression	0.00680395
0.2509	0.00819972	0.476116	0.0245896	0.476693	0.00303943	{'classifier__C': 1, 'classifier__penalty': 'l2', 'classifier__solver': 'liblinear'}	1	yeo-johnson	truncatedsvd	logistic_regression	0.000577348
0.0206013	0.0036011	0.360212	0.0442159	0.370974	0.0353489	{}	1	robust	ica	gaussian_nb	0.0107618
0.0672986	0.00600123	0.46867	0.0222125	0.476618	0.00273546	{}	1	quantile-uniform	ica	gaussian_nb	0.00794842
0.1827	0.0131002	0.376433	0.0020013	0.376431	0.000221608	{'classifier__max_depth': None, 'classifier__min_samples_leaf': 5, 'classifier__min_samples_split': 2, 'classifier__n_estimators': 100}	27	robust	ica	extra_trees	-1.976e-06
0.319301	0.0197995	0.376433	0.0020013	0.376431	0.000221608	{'classifier__max_depth': None, 'classifier__min_samples_leaf': 5, 'classifier__min_samples_split': 2, 'classifier__n_estimators': 200}	27	robust	ica	extra_trees	-1.976e-06
0.470533	0.0279006	0.376433	0.0020013	0.376431	0.000221608	{'classifier__max_depth': None, 'classifier__min_samples_leaf': 5, 'classifier__min_samples_split': 2, 'classifier__n_estimators': 300}	27	robust	ica	extra_trees	-1.976e-06
0.763587	0.0456193	0.376433	0.0020013	0.376431	0.000221608	{'classifier__max_depth': None, 'classifier__min_samples_leaf': 5, 'classifier__min_samples_split': 2, 'classifier__n_estimators': 500}	27	robust	ica	extra_trees	-1.976e-06
0.1798	0.0136999	0.376433	0.0020013	0.376431	0.000221608	{'classifier__max_depth': None, 'classifier__min_samples_leaf': 5, 'classifier__min_samples_split': 10, 'classifier__n_estimators': 100}	27	robust	ica	extra_trees	-1.976e-06
0.323278	0.0213589	0.376433	0.0020013	0.376431	0.000221608	{'classifier__max_depth': None, 'classifier__min_samples_leaf': 5, 'classifier__min_samples_split': 10, 'classifier__n_estimators': 200}	27	robust	ica	extra_trees	-1.976e-06
0.470498	0.0281002	0.376433	0.0020013	0.376431	0.000221608	{'classifier__max_depth': None, 'classifier__min_samples_leaf': 5, 'classifier__min_samples_split': 10, 'classifier__n_estimators': 300}	27	robust	ica	extra_trees	-1.976e-06
0.7887	0.0465002	0.376433	0.0020013	0.376431	0.000221608	{'classifier__max_depth': None, 'classifier__min_samples_leaf': 5, 'classifier__min_samples_split': 10, 'classifier__n_estimators': 500}	27	robust	ica	extra_trees	-1.976e-06
0.1824	0.0132998	0.376433	0.0020013	0.376431	0.000221608	{'classifier__max_depth': None, 'classifier__min_samples_leaf': 5, 'classifier__min_samples_split': 20, 'classifier__n_estimators': 100}	27	robust	ica	extra_trees	-1.976e-06
0.3248	0.0207004	0.376433	0.0020013	0.376431	0.000221608	{'classifier__max_depth': None, 'classifier__min_samples_leaf': 5, 'classifier__min_samples_split': 20, 'classifier__n_estimators': 200}	27	robust	ica	extra_trees	-1.976e-06
0.475999	0.0293003	0.376433	0.0020013	0.376431	0.000221608	{'classifier__max_depth': None, 'classifier__min_samples_leaf': 5, 'classifier__min_samples_split': 20, 'classifier__n_estimators': 300}	27	robust	ica	extra_trees	-1.976e-06
0.780801	0.0470996	0.376433	0.0020013	0.376431	0.000221608	{'classifier__max_depth': None, 'classifier__min_samples_leaf': 5, 'classifier__min_samples_split': 20, 'classifier__n_estimators': 500}	27	robust	ica	extra_trees	-1.976e-06
0.182001	0.0131999	0.376433	0.0020013	0.376431	0.000221608	{'classifier__max_depth': None, 'classifier__min_samples_leaf': 10, 'classifier__min_samples_split': 2, 'classifier__n_estimators': 100}	27	robust	ica	extra_trees	-1.976e-06
0.3311	0.0236	0.376433	0.0020013	0.376431	0.000221608	{'classifier__max_depth': None, 'classifier__min_samples_leaf': 10, 'classifier__min_samples_split': 2, 'classifier__n_estimators': 200}	27	robust	ica	extra_trees	-1.976e-06
0.479999	0.0284005	0.376433	0.0020013	0.376431	0.000221608	{'classifier__max_depth': None, 'classifier__min_samples_leaf': 10, 'classifier__min_samples_split': 2, 'classifier__n_estimators': 300}	27	robust	ica	extra_trees	-1.976e-06
0.761665	0.0437997	0.376433	0.0020013	0.376431	0.000221608	{'classifier__max_depth': None, 'classifier__min_samples_leaf': 10, 'classifier__min_samples_split': 2, 'classifier__n_estimators': 500}	27	robust	ica	extra_trees	-1.976e-06
0.177877	0.0133384	0.376433	0.0020013	0.376431	0.000221608	{'classifier__max_depth': None, 'classifier__min_samples_leaf': 10, 'classifier__min_samples_split': 10, 'classifier__n_estimators': 100}	27	robust	ica	extra_trees	-1.976e-06
0.3234	0.0231001	0.376433	0.0020013	0.376431	0.000221608	{'classifier__max_depth': None, 'classifier__min_samples_leaf': 10, 'classifier__min_samples_split': 10, 'classifier__n_estimators': 200}	27	robust	ica	extra_trees	-1.976e-06
0.4683	0.0286996	0.376433	0.0020013	0.376431	0.000221608	{'classifier__max_depth': None, 'classifier__min_samples_leaf': 10, 'classifier__min_samples_split': 10, 'classifier__n_estimators': 300}	27	robust	ica	extra_trees	-1.976e-06
0.7647	0.0440998	0.376433	0.0020013	0.376431	0.000221608	{'classifier__max_depth': None, 'classifier__min_samples_leaf': 10, 'classifier__min_samples_split': 10, 'classifier__n_estimators': 500}	27	robust	ica	extra_trees	-1.976e-06
0.1802	0.0134003	0.376433	0.0020013	0.376431	0.000221608	{'classifier__max_depth': None, 'classifier__min_samples_leaf': 10, 'classifier__min_samples_split': 20, 'classifier__n_estimators': 100}	27	robust	ica	extra_trees	-1.976e-06
0.3373	0.0209998	0.376433	0.0020013	0.376431	0.000221608	{'classifier__max_depth': None, 'classifier__min_samples_leaf': 10, 'classifier__min_samples_split': 20, 'classifier__n_estimators': 200}	27	robust	ica	extra_trees	-1.976e-06
0.4675	0.0293002	0.376433	0.0020013	0.376431	0.000221608	{'classifier__max_depth': None, 'classifier__min_samples_leaf': 10, 'classifier__min_samples_split': 20, 'classifier__n_estimators': 300}	27	robust	ica	extra_trees	-1.976e-06
0.761075	0.0444008	0.376433	0.0020013	0.376431	0.000221608	{'classifier__max_depth': None, 'classifier__min_samples_leaf': 10, 'classifier__min_samples_split': 20, 'classifier__n_estimators': 500}	27	robust	ica	extra_trees	-1.976e-06
0.353332	0.0224999	0.383847	0.0111151	0.412495	0.00777311	{'classifier__max_depth': 10, 'classifier__min_samples_leaf': 1, 'classifier__min_samples_split': 10, 'classifier__n_estimators': 200}	12	robust	ica	extra_trees	0.0286476
0.517801	0.0318997	0.384518	0.00895573	0.413617	0.00889059	{'classifier__max_depth': 10, 'classifier__min_samples_leaf': 1, 'classifier__min_samples_split': 10, 'classifier__n_estimators': 300}	10	robust	ica	extra_trees	0.0290983
0.859403	0.0497997	0.383172	0.0103697	0.413168	0.00794733	{'classifier__max_depth': 10, 'classifier__min_samples_leaf': 1, 'classifier__min_samples_split': 10, 'classifier__n_estimators': 500}	15	robust	ica	extra_trees	0.0299963
0.192799	0.014	0.38519	0.00951977	0.405162	0.00646265	{'classifier__max_depth': 10, 'classifier__min_samples_leaf': 1, 'classifier__min_samples_split': 20, 'classifier__n_estimators': 100}	6	robust	ica	extra_trees	0.0199726
0.348821	0.0226	0.383172	0.0103697	0.403217	0.00534067	{'classifier__max_depth': 10, 'classifier__min_samples_leaf': 1, 'classifier__min_samples_split': 20, 'classifier__n_estimators': 200}	15	robust	ica	extra_trees	0.0200451
0.507221	0.0313003	0.383172	0.0103697	0.404639	0.00590988	{'classifier__max_depth': 10, 'classifier__min_samples_leaf': 1, 'classifier__min_samples_split': 20, 'classifier__n_estimators': 300}	15	robust	ica	extra_trees	0.021467
0.8407	0.0510997	0.383172	0.0103697	0.404564	0.00592329	{'classifier__max_depth': 10, 'classifier__min_samples_leaf': 1, 'classifier__min_samples_split': 20, 'classifier__n_estimators': 500}	15	robust	ica	extra_trees	0.0213919
0.177601	0.0128002	0.376433	0.0020013	0.376431	0.000221608	{'classifier__max_depth': 10, 'classifier__min_samples_leaf': 5, 'classifier__min_samples_split': 2, 'classifier__n_estimators': 100}	27	robust	ica	extra_trees	-1.976e-06
0.3219	0.0202003	0.376433	0.0020013	0.376431	0.000221608	{'classifier__max_depth': 10, 'classifier__min_samples_leaf': 5, 'classifier__min_samples_split': 2, 'classifier__n_estimators': 200}	27	robust	ica	extra_trees	-1.976e-06
0.4674	0.0290001	0.376433	0.0020013	0.376431	0.000221608	{'classifier__max_depth': 10, 'classifier__min_samples_leaf': 5, 'classifier__min_samples_split': 2, 'classifier__n_estimators': 300}	27	robust	ica	extra_trees	-1.976e-06
0.766	0.0453001	0.376433	0.0020013	0.376431	0.000221608	{'classifier__max_depth': 10, 'classifier__min_samples_leaf': 5, 'classifier__min_samples_split': 2, 'classifier__n_estimators': 500}	27	robust	ica	extra_trees	-1.976e-06
0.1786	0.0127002	0.376433	0.0020013	0.376431	0.000221608	{'classifier__max_depth': 10, 'classifier__min_samples_leaf': 5, 'classifier__min_samples_split': 10, 'classifier__n_estimators': 100}	27	robust	ica	extra_trees	-1.976e-06
0.326399	0.0217004	0.376433	0.0020013	0.376431	0.000221608	{'classifier__max_depth': 10, 'classifier__min_samples_leaf': 5, 'classifier__min_samples_split': 10, 'classifier__n_estimators': 200}	27	robust	ica	extra_trees	-1.976e-06
0.465299	0.0285999	0.376433	0.0020013	0.376431	0.000221608	{'classifier__max_depth': 10, 'classifier__min_samples_leaf': 5, 'classifier__min_samples_split': 10, 'classifier__n_estimators': 300}	27	robust	ica	extra_trees	-1.976e-06
0.7597	0.0441997	0.376433	0.0020013	0.376431	0.000221608	{'classifier__max_depth': 10, 'classifier__min_samples_leaf': 5, 'classifier__min_samples_split': 10, 'classifier__n_estimators': 500}	27	robust	ica	extra_trees	-1.976e-06
0.1776	0.0131001	0.376433	0.0020013	0.376431	0.000221608	{'classifier__max_depth': 10, 'classifier__min_samples_leaf': 5, 'classifier__min_samples_split': 20, 'classifier__n_estimators': 100}	27	robust	ica	extra_trees	-1.976e-06
0.322399	0.0210001	0.376433	0.0020013	0.376431	0.000221608	{'classifier__max_depth': 10, 'classifier__min_samples_leaf': 5, 'classifier__min_samples_split': 20, 'classifier__n_estimators': 200}	27	robust	ica	extra_trees	-1.976e-06
0.46583	0.0287324	0.376433	0.0020013	0.376431	0.000221608	{'classifier__max_depth': 10, 'classifier__min_samples_leaf': 5, 'classifier__min_samples_split': 20, 'classifier__n_estimators': 300}	27	robust	ica	extra_trees	-1.976e-06
0.772263	0.0440999	0.376433	0.0020013	0.376431	0.000221608	{'classifier__max_depth': 10, 'classifier__min_samples_leaf': 5, 'classifier__min_samples_split': 20, 'classifier__n_estimators': 500}	27	robust	ica	extra_trees	-1.976e-06
0.177766	0.0129001	0.376433	0.0020013	0.376431	0.000221608	{'classifier__max_depth': 10, 'classifier__min_samples_leaf': 10, 'classifier__min_samples_split': 2, 'classifier__n_estimators': 100}	27	robust	ica	extra_trees	-1.976e-06
0.324099	0.0210001	0.376433	0.0020013	0.376431	0.000221608	{'classifier__max_depth': 10, 'classifier__min_samples_leaf': 10, 'classifier__min_samples_split': 2, 'classifier__n_estimators': 200}	27	robust	ica	extra_trees	-1.976e-06
0.468999	0.0289002	0.376433	0.0020013	0.376431	0.000221608	{'classifier__max_depth': 10, 'classifier__min_samples_leaf': 10, 'classifier__min_samples_split': 2, 'classifier__n_estimators': 300}	27	robust	ica	extra_trees	-1.976e-06
0.758199	0.0437002	0.376433	0.0020013	0.376431	0.000221608	{'classifier__max_depth': 10, 'classifier__min_samples_leaf': 10, 'classifier__min_samples_split': 2, 'classifier__n_estimators': 500}	27	robust	ica	extra_trees	-1.976e-06
0.1804	0.0132004	0.376433	0.0020013	0.376431	0.000221608	{'classifier__max_depth': 10, 'classifier__min_samples_leaf': 10, 'classifier__min_samples_split': 10, 'classifier__n_estimators': 100}	27	robust	ica	extra_trees	-1.976e-06
0.3212	0.0216997	0.376433	0.0020013	0.376431	0.000221608	{'classifier__max_depth': 10, 'classifier__min_samples_leaf': 10, 'classifier__min_samples_split': 10, 'classifier__n_estimators': 200}	27	robust	ica	extra_trees	-1.976e-06
0.466	0.0283001	0.376433	0.0020013	0.376431	0.000221608	{'classifier__max_depth': 10, 'classifier__min_samples_leaf': 10, 'classifier__min_samples_split': 10, 'classifier__n_estimators': 300}	27	robust	ica	extra_trees	-1.976e-06
0.760619	0.0443931	0.376433	0.0020013	0.376431	0.000221608	{'classifier__max_depth': 10, 'classifier__min_samples_leaf': 10, 'classifier__min_samples_split': 10, 'classifier__n_estimators': 500}	27	robust	ica	extra_trees	-1.976e-06
0.1775	0.0129002	0.376433	0.0020013	0.376431	0.000221608	{'classifier__max_depth': 10, 'classifier__min_samples_leaf': 10, 'classifier__min_samples_split': 20, 'classifier__n_estimators': 100}	27	robust	ica	extra_trees	-1.976e-06
0.3192	0.0207173	0.376433	0.0020013	0.376431	0.000221608	{'classifier__max_depth': 10, 'classifier__min_samples_leaf': 10, 'classifier__min_samples_split': 20, 'classifier__n_estimators': 200}	27	robust	ica	extra_trees	-1.976e-06
0.471187	0.0283999	0.376433	0.0020013	0.376431	0.000221608	{'classifier__max_depth': 10, 'classifier__min_samples_leaf': 10, 'classifier__min_samples_split': 20, 'classifier__n_estimators': 300}	27	robust	ica	extra_trees	-1.976e-06
0.743101	0.0421998	0.376433	0.0020013	0.376431	0.000221608	{'classifier__max_depth': 10, 'classifier__min_samples_leaf': 10, 'classifier__min_samples_split': 20, 'classifier__n_estimators': 500}	27	robust	ica	extra_trees	-1.976e-06
0.178601	0.0129007	0.376433	0.0020013	0.376431	0.000221608	{'classifier__max_depth': 20, 'classifier__min_samples_leaf': 5, 'classifier__min_samples_split': 2, 'classifier__n_estimators': 100}	27	robust	ica	extra_trees	-1.976e-06
0.318099	0.0203997	0.376433	0.0020013	0.376431	0.000221608	{'classifier__max_depth': 20, 'classifier__min_samples_leaf': 5, 'classifier__min_samples_split': 2, 'classifier__n_estimators': 200}	27	robust	ica	extra_trees	-1.976e-06
0.4637	0.0278008	0.376433	0.0020013	0.376431	0.000221608	{'classifier__max_depth': 20, 'classifier__min_samples_leaf': 5, 'classifier__min_samples_split': 2, 'classifier__n_estimators': 300}	27	robust	ica	extra_trees	-1.976e-06
0.75533	0.0454468	0.376433	0.0020013	0.376431	0.000221608	{'classifier__max_depth': 20, 'classifier__min_samples_leaf': 5, 'classifier__min_samples_split': 2, 'classifier__n_estimators': 500}	27	robust	ica	extra_trees	-1.976e-06
0.1801	0.0132002	0.376433	0.0020013	0.376431	0.000221608	{'classifier__max_depth': 20, 'classifier__min_samples_leaf': 5, 'classifier__min_samples_split': 10, 'classifier__n_estimators': 100}	27	robust	ica	extra_trees	-1.976e-06
0.326201	0.0205998	0.376433	0.0020013	0.376431	0.000221608	{'classifier__max_depth': 20, 'classifier__min_samples_leaf': 5, 'classifier__min_samples_split': 10, 'classifier__n_estimators': 200}	27	robust	ica	extra_trees	-1.976e-06
0.473355	0.0290996	0.376433	0.0020013	0.376431	0.000221608	{'classifier__max_depth': 20, 'classifier__min_samples_leaf': 5, 'classifier__min_samples_split': 10, 'classifier__n_estimators': 300}	27	robust	ica	extra_trees	-1.976e-06
0.76194	0.0442005	0.376433	0.0020013	0.376431	0.000221608	{'classifier__max_depth': 20, 'classifier__min_samples_leaf': 5, 'classifier__min_samples_split': 10, 'classifier__n_estimators': 500}	27	robust	ica	extra_trees	-1.976e-06
0.177999	0.0128001	0.376433	0.0020013	0.376431	0.000221608	{'classifier__max_depth': 20, 'classifier__min_samples_leaf': 5, 'classifier__min_samples_split': 20, 'classifier__n_estimators': 100}	27	robust	ica	extra_trees	-1.976e-06
0.325499	0.0216002	0.376433	0.0020013	0.376431	0.000221608	{'classifier__max_depth': 20, 'classifier__min_samples_leaf': 5, 'classifier__min_samples_split': 20, 'classifier__n_estimators': 200}	27	robust	ica	extra_trees	-1.976e-06
0.4732	0.0298003	0.376433	0.0020013	0.376431	0.000221608	{'classifier__max_depth': 20, 'classifier__min_samples_leaf': 5, 'classifier__min_samples_split': 20, 'classifier__n_estimators': 300}	27	robust	ica	extra_trees	-1.976e-06
0.763	0.0450001	0.376433	0.0020013	0.376431	0.000221608	{'classifier__max_depth': 20, 'classifier__min_samples_leaf': 5, 'classifier__min_samples_split': 20, 'classifier__n_estimators': 500}	27	robust	ica	extra_trees	-1.976e-06
0.1776	0.0128007	0.376433	0.0020013	0.376431	0.000221608	{'classifier__max_depth': 20, 'classifier__min_samples_leaf': 10, 'classifier__min_samples_split': 2, 'classifier__n_estimators': 100}	27	robust	ica	extra_trees	-1.976e-06
0.3267	0.0215003	0.376433	0.0020013	0.376431	0.000221608	{'classifier__max_depth': 20, 'classifier__min_samples_leaf': 10, 'classifier__min_samples_split': 2, 'classifier__n_estimators': 200}	27	robust	ica	extra_trees	-1.976e-06
0.462035	0.0298184	0.376433	0.0020013	0.376431	0.000221608	{'classifier__max_depth': 20, 'classifier__min_samples_leaf': 10, 'classifier__min_samples_split': 2, 'classifier__n_estimators': 300}	27	robust	ica	extra_trees	-1.976e-06
0.769082	0.0457999	0.376433	0.0020013	0.376431	0.000221608	{'classifier__max_depth': 20, 'classifier__min_samples_leaf': 10, 'classifier__min_samples_split': 2, 'classifier__n_estimators': 500}	27	robust	ica	extra_trees	-1.976e-06
0.179732	0.0131054	0.376433	0.0020013	0.376431	0.000221608	{'classifier__max_depth': 20, 'classifier__min_samples_leaf': 10, 'classifier__min_samples_split': 10, 'classifier__n_estimators': 100}	27	robust	ica	extra_trees	-1.976e-06
0.317245	0.0215001	0.376433	0.0020013	0.376431	0.000221608	{'classifier__max_depth': 20, 'classifier__min_samples_leaf': 10, 'classifier__min_samples_split': 10, 'classifier__n_estimators': 200}	27	robust	ica	extra_trees	-1.976e-06
0.468136	0.0284171	0.376433	0.0020013	0.376431	0.000221608	{'classifier__max_depth': 20, 'classifier__min_samples_leaf': 10, 'classifier__min_samples_split': 10, 'classifier__n_estimators': 300}	27	robust	ica	extra_trees	-1.976e-06
0.762571	0.0449995	0.376433	0.0020013	0.376431	0.000221608	{'classifier__max_depth': 20, 'classifier__min_samples_leaf': 10, 'classifier__min_samples_split': 10, 'classifier__n_estimators': 500}	27	robust	ica	extra_trees	-1.976e-06
0.177168	0.0129997	0.376433	0.0020013	0.376431	0.000221608	{'classifier__max_depth': 20, 'classifier__min_samples_leaf': 10, 'classifier__min_samples_split': 20, 'classifier__n_estimators': 100}	27	robust	ica	extra_trees	-1.976e-06
0.3225	0.0214998	0.376433	0.0020013	0.376431	0.000221608	{'classifier__max_depth': 20, 'classifier__min_samples_leaf': 10, 'classifier__min_samples_split': 20, 'classifier__n_estimators': 200}	27	robust	ica	extra_trees	-1.976e-06
0.4455	0.0229993	0.376433	0.0020013	0.376431	0.000221608	{'classifier__max_depth': 20, 'classifier__min_samples_leaf': 10, 'classifier__min_samples_split': 20, 'classifier__n_estimators': 300}	27	robust	ica	extra_trees	-1.976e-06
0.573501	0.0241995	0.376433	0.0020013	0.376431	0.000221608	{'classifier__max_depth': 20, 'classifier__min_samples_leaf': 10, 'classifier__min_samples_split': 20, 'classifier__n_estimators': 500}	27	robust	ica	extra_trees	-1.976e-06
4602785397	0.00561323	0.379807	0.00781145	0.397456	0.0042698	{'classifier__alpha': 0.0001, 'classifier__hidden_layer_sizes': (50,)}	4	robust	ica	mlp	0.0176497
5748066163	0.00580063	0.381158	0.00534326	0.401572	0.00525991	{'classifier__alpha': 0.0001, 'classifier__hidden_layer_sizes': (100,)}	2	robust	ica	mlp	0.0204137
444859755	0.00540042	0.378469	0.00958989	0.396259	0.00433947	{'classifier__alpha': 0.001, 'classifier__hidden_layer_sizes': (50,)}	5	robust	ica	mlp	0.01779
5489541626	0.00560019	0.37846	0.00697332	0.4003	0.0050975	{'classifier__alpha': 0.001, 'classifier__hidden_layer_sizes': (100,)}	7	robust	ica	mlp	0.02184
4682108641	0.00619876	0.37982	0.0120079	0.406135	0.00621691	{'classifier__alpha': 0.001, 'classifier__hidden_layer_sizes': (50, 50)}	3	robust	ica	mlp	0.0263149
0.0656004	0.00600009	0.469345	0.0204532	0.47542	0.0038192	{}	1	quantile-uniform	truncatedsvd	gaussian_nb	0.00607503
4840910816	0.00380003	0.378465	0.00721777	0.399177	0.00401099	{'classifier__alpha': 0.01, 'classifier__hidden_layer_sizes': (100,)}	6	robust	ica	mlp	0.0207128
356580615	0.00360034	0.378455	0.00671999	0.405537	0.00689799	{'classifier__alpha': 0.01, 'classifier__hidden_layer_sizes': (50, 50)}	8	robust	ica	mlp	0.0270813
1012180295	0.0089	0.405333	0.0275118	0.400529	0.0239172	{'classifier__C': 0.1, 'classifier__gamma': 'scale'}	1	robust	random_projection	svm_linear	-0.00480375
3196211545	0.00929899	0.397297	0.0265894	0.396783	0.01964	{'classifier__C': 0.1, 'classifier__gamma': 'auto'}	4	robust	random_projection	svm_linear	-0.000514516
9223184183	0.0093997	0.401351	0.0222085	0.404264	0.0220525	{'classifier__C': 1, 'classifier__gamma': 'scale'}	3	robust	random_projection	svm_linear	0.00291271
5217121696	0.00921328	0.40468	0.0213468	0.403446	0.0181985	{'classifier__C': 1, 'classifier__gamma': 'auto'}	2	robust	random_projection	svm_linear	-0.0012336
6910794528	0.00859988	0.395293	0.0211961	0.400071	0.0160606	{'classifier__C': 10, 'classifier__gamma': 'scale'}	5	robust	random_projection	svm_linear	0.00477855
3899292063	0.00709999	0.393892	0.0236464	0.39791	0.0246334	{'classifier__C': 10, 'classifier__gamma': 'auto'}	6	robust	random_projection	svm_linear	0.00401825
0.12402	0.0283148	0.381158	0.0128651	0.38077	0.00952682	{'classifier__C': 0.1, 'classifier__gamma': 'scale'}	4	robust	random_projection	svm_rbf	-0.000388261
0.244946	0.0308002	0.380473	0.00753555	0.380396	0.00784786	{'classifier__C': 0.1, 'classifier__gamma': 'auto'}	5	robust	random_projection	svm_rbf	-7.7262e-05
0.168859	0.0293996	0.38518	0.0105104	0.399026	0.0165871	{'classifier__C': 1, 'classifier__gamma': 'scale'}	3	robust	random_projection	svm_rbf	0.0138452
2582839563	0.00980396	0.473399	0.0232568	0.474897	0.00640591	{'classifier__C': 10, 'classifier__penalty': 'l1', 'classifier__solver': 'liblinear'}	1	normalizer	nca	logistic_regression	0.00149764
0.124799	0.0142002	0.35219	0.0333728	0.347621	0.025574	{'classifier__C': 0.1, 'classifier__gamma': 'auto'}	3	robust	random_projection	svm_sigmoid	-0.00456953
0.1059	0.0124999	0.354222	0.0210642	0.352639	0.0205631	{'classifier__C': 1, 'classifier__gamma': 'scale'}	2	robust	random_projection	svm_sigmoid	-0.00158299
0.1256	0.0155001	0.305074	0.0218708	0.312532	0.0233798	{'classifier__C': 1, 'classifier__gamma': 'auto'}	5	robust	random_projection	svm_sigmoid	0.00745793
0.103398	0.0132006	0.30843	0.0270331	0.312756	0.0284886	{'classifier__C': 10, 'classifier__gamma': 'scale'}	4	robust	random_projection	svm_sigmoid	0.00432544
0.102599	0.0113004	0.292962	0.0435263	0.294048	0.0235197	{'classifier__C': 10, 'classifier__gamma': 'auto'}	6	robust	random_projection	svm_sigmoid	0.00108577
0.0283009	0.00410101	0.392586	0.0105425	0.392146	0.0101539	{'classifier__C': 0.1, 'classifier__penalty': 'l1', 'classifier__solver': 'liblinear'}	2	robust	random_projection	logistic_regression	-0.000439726
1.27797	0.04209	0.468701	0.0179394	0.474821	0.00682278	{'classifier__C': 0.1, 'classifier__gamma': 'scale'}	1	minmax	isomap	svm_sigmoid	0.00611994
0.0318213	0.00440002	0.39055	0.0258209	0.396486	0.0178366	{'classifier__C': 1, 'classifier__penalty': 'l1', 'classifier__solver': 'liblinear'}	3	robust	random_projection	logistic_regression	0.00593623
0.0312764	0.00429924	0.390545	0.0129334	0.397234	0.0138141	{'classifier__C': 1, 'classifier__penalty': 'l2', 'classifier__solver': 'liblinear'}	4	robust	random_projection	logistic_regression	0.00668899
0.0306998	0.00430024	0.38991	0.0170598	0.390423	0.0124157	{'classifier__C': 10, 'classifier__penalty': 'l1', 'classifier__solver': 'liblinear'}	6	robust	random_projection	logistic_regression	0.000512757
0.0288995	0.00400112	0.390545	0.0184563	0.401424	0.0149904	{'classifier__C': 10, 'classifier__penalty': 'l2', 'classifier__solver': 'liblinear'}	4	robust	random_projection	logistic_regression	0.0108786
0.130895	0.00781524	0.47476	0.0183275	0.474523	0.00213389	{'classifier__C': 1, 'classifier__penalty': 'l1', 'classifier__solver': 'liblinear'}	1	quantile-uniform	pca	logistic_regression	-0.000236753
0.0119003	0.00319989	0.463341	0.0242068	0.472803	0.00437105	{}	1	maxabs	truncatedsvd	gaussian_nb	0.00946167
0.1646	0.0131	0.38046	0.0100059	0.38197	0.0156692	{'classifier__max_depth': None, 'classifier__min_samples_leaf': 5, 'classifier__min_samples_split': 2, 'classifier__n_estimators': 100}	45	robust	random_projection	extra_trees	0.0015101
0.3172	0.0216001	0.379127	0.00526144	0.384736	0.0117827	{'classifier__max_depth': None, 'classifier__min_samples_leaf': 5, 'classifier__min_samples_split': 2, 'classifier__n_estimators': 200}	55	robust	random_projection	extra_trees	0.00560925
0.447496	0.0281004	0.377775	0.00431577	0.379275	0.00550832	{'classifier__max_depth': None, 'classifier__min_samples_leaf': 5, 'classifier__min_samples_split': 2, 'classifier__n_estimators': 300}	67	robust	random_projection	extra_trees	0.0014995
0.758959	0.0434997	0.379136	0.00727118	0.381369	0.00842613	{'classifier__max_depth': None, 'classifier__min_samples_leaf': 5, 'classifier__min_samples_split': 2, 'classifier__n_estimators': 500}	52	robust	random_projection	extra_trees	0.0022332
0.1714	0.0131001	0.377104	0.00269475	0.377479	0.00225052	{'classifier__max_depth': None, 'classifier__min_samples_leaf': 5, 'classifier__min_samples_split': 10, 'classifier__n_estimators': 100}	75	robust	random_projection	extra_trees	0.000374395
0.318699	0.0206998	0.377775	0.00431577	0.381146	0.00713464	{'classifier__max_depth': None, 'classifier__min_samples_leaf': 5, 'classifier__min_samples_split': 10, 'classifier__n_estimators': 200}	67	robust	random_projection	extra_trees	0.00337047
0.473001	0.0295993	0.380478	0.00936095	0.381293	0.00907395	{'classifier__max_depth': None, 'classifier__min_samples_leaf': 5, 'classifier__min_samples_split': 10, 'classifier__n_estimators': 300}	42	robust	random_projection	extra_trees	0.000815398
0.772848	0.0440161	0.380478	0.00573087	0.383088	0.010826	{'classifier__max_depth': None, 'classifier__min_samples_leaf': 5, 'classifier__min_samples_split': 10, 'classifier__n_estimators': 500}	42	robust	random_projection	extra_trees	0.00261052
0.1758	0.0129002	0.384491	0.0198098	0.385936	0.0176323	{'classifier__max_depth': None, 'classifier__min_samples_leaf': 5, 'classifier__min_samples_split': 20, 'classifier__n_estimators': 100}	29	robust	random_projection	extra_trees	0.00144517
0.315363	0.0205998	0.38046	0.0120482	0.380323	0.0105054	{'classifier__max_depth': None, 'classifier__min_samples_leaf': 5, 'classifier__min_samples_split': 20, 'classifier__n_estimators': 200}	46	robust	random_projection	extra_trees	-0.000136885
0.465165	0.0292003	0.379802	0.00463978	0.383314	0.00917943	{'classifier__max_depth': None, 'classifier__min_samples_leaf': 5, 'classifier__min_samples_split': 20, 'classifier__n_estimators': 300}	50	robust	random_projection	extra_trees	0.00351175
0.762599	0.0465996	0.379118	0.00810417	0.379126	0.00786774	{'classifier__max_depth': None, 'classifier__min_samples_leaf': 5, 'classifier__min_samples_split': 20, 'classifier__n_estimators': 500}	58	robust	random_projection	extra_trees	8.016e-06
0.1701	0.0139002	0.377109	0.00327765	0.376506	0.000259244	{'classifier__max_depth': None, 'classifier__min_samples_leaf': 10, 'classifier__min_samples_split': 2, 'classifier__n_estimators': 100}	74	robust	random_projection	extra_trees	-0.000602857
0.3149	0.0225999	0.379127	0.00526144	0.378975	0.00412461	{'classifier__max_depth': None, 'classifier__min_samples_leaf': 10, 'classifier__min_samples_split': 2, 'classifier__n_estimators': 200}	56	robust	random_projection	extra_trees	-0.000151259
0.463922	0.0282003	0.376433	0.0020013	0.376506	0.000330778	{'classifier__max_depth': None, 'classifier__min_samples_leaf': 10, 'classifier__min_samples_split': 2, 'classifier__n_estimators': 300}	82	robust	random_projection	extra_trees	7.2874e-05
0.756175	0.0451992	0.376433	0.0020013	0.37673	0.000946258	{'classifier__max_depth': None, 'classifier__min_samples_leaf': 10, 'classifier__min_samples_split': 2, 'classifier__n_estimators': 500}	82	robust	random_projection	extra_trees	0.000297425
0.174687	0.014	0.377109	0.00327765	0.376955	0.00151341	{'classifier__max_depth': None, 'classifier__min_samples_leaf': 10, 'classifier__min_samples_split': 10, 'classifier__n_estimators': 100}	71	robust	random_projection	extra_trees	-0.000154091
0.308399	0.0213998	0.376433	0.0020013	0.376431	0.000221608	{'classifier__max_depth': None, 'classifier__min_samples_leaf': 10, 'classifier__min_samples_split': 10, 'classifier__n_estimators': 200}	82	robust	random_projection	extra_trees	-1.976e-06
0.4557	0.0288001	0.376433	0.0020013	0.376431	0.000221608	{'classifier__max_depth': None, 'classifier__min_samples_leaf': 10, 'classifier__min_samples_split': 10, 'classifier__n_estimators': 300}	82	robust	random_projection	extra_trees	-1.976e-06
0.745294	0.0440998	0.376433	0.0020013	0.376431	0.000221608	{'classifier__max_depth': None, 'classifier__min_samples_leaf': 10, 'classifier__min_samples_split': 10, 'classifier__n_estimators': 500}	82	robust	random_projection	extra_trees	-1.976e-06
0.1695	0.0131998	0.377104	0.00269475	0.376805	0.0011658	{'classifier__max_depth': None, 'classifier__min_samples_leaf': 10, 'classifier__min_samples_split': 20, 'classifier__n_estimators': 100}	75	robust	random_projection	extra_trees	-0.000298865
0.312017	0.0211997	0.376433	0.0020013	0.377853	0.00295455	{'classifier__max_depth': None, 'classifier__min_samples_leaf': 10, 'classifier__min_samples_split': 20, 'classifier__n_estimators': 200}	82	robust	random_projection	extra_trees	0.00141979
0.458077	0.0284	0.37778	0.00361836	0.37703	0.00124399	{'classifier__max_depth': None, 'classifier__min_samples_leaf': 10, 'classifier__min_samples_split': 20, 'classifier__n_estimators': 300}	65	robust	random_projection	extra_trees	-0.000750157
0.7463	0.0420002	0.38046	0.0120482	0.3792	0.0083333	{'classifier__max_depth': None, 'classifier__min_samples_leaf': 10, 'classifier__min_samples_split': 20, 'classifier__n_estimators': 500}	46	robust	random_projection	extra_trees	-0.00125936
0.498799	0.0317998	0.419527	0.0318497	0.445196	0.0387128	{'classifier__max_depth': 10, 'classifier__min_samples_leaf': 1, 'classifier__min_samples_split': 20, 'classifier__n_estimators': 300}	3	robust	random_projection	extra_trees	0.0256692
0.17	0.0130998	0.376433	0.0020013	0.377179	0.00159333	{'classifier__max_depth': 10, 'classifier__min_samples_leaf': 5, 'classifier__min_samples_split': 2, 'classifier__n_estimators': 100}	82	robust	random_projection	extra_trees	0.000746135
0.3141	0.0207002	0.383834	0.0114214	0.385635	0.0119521	{'classifier__max_depth': 10, 'classifier__min_samples_leaf': 5, 'classifier__min_samples_split': 2, 'classifier__n_estimators': 200}	30	robust	random_projection	extra_trees	0.00180112
0.455395	0.0284999	0.380469	0.00590152	0.38092	0.00780405	{'classifier__max_depth': 10, 'classifier__min_samples_leaf': 5, 'classifier__min_samples_split': 2, 'classifier__n_estimators': 300}	44	robust	random_projection	extra_trees	0.000451112
0.761258	0.0442	0.382487	0.0131796	0.383465	0.0130996	{'classifier__max_depth': 10, 'classifier__min_samples_leaf': 5, 'classifier__min_samples_split': 2, 'classifier__n_estimators': 500}	32	robust	random_projection	extra_trees	0.000978289
0.172327	0.0131998	0.38114	0.008296	0.385036	0.010951	{'classifier__max_depth': 10, 'classifier__min_samples_leaf': 5, 'classifier__min_samples_split': 10, 'classifier__n_estimators': 100}	39	robust	random_projection	extra_trees	0.00389551
0.3098	0.0207005	0.377784	0.00272707	0.377403	0.00242919	{'classifier__max_depth': 10, 'classifier__min_samples_leaf': 5, 'classifier__min_samples_split': 10, 'classifier__n_estimators': 200}	64	robust	random_projection	extra_trees	-0.000381001
0.460899	0.0285	0.379118	0.00621706	0.380772	0.0113595	{'classifier__max_depth': 10, 'classifier__min_samples_leaf': 5, 'classifier__min_samples_split': 10, 'classifier__n_estimators': 300}	58	robust	random_projection	extra_trees	0.00165467
0.756586	0.0440514	0.382478	0.0160174	0.381819	0.0104023	{'classifier__max_depth': 10, 'classifier__min_samples_leaf': 5, 'classifier__min_samples_split': 10, 'classifier__n_estimators': 500}	33	robust	random_projection	extra_trees	-0.000659013
0.171801	0.0132002	0.377775	0.00431577	0.381295	0.00735427	{'classifier__max_depth': 10, 'classifier__min_samples_leaf': 5, 'classifier__min_samples_split': 20, 'classifier__n_estimators': 100}	67	robust	random_projection	extra_trees	0.00351972
0.311567	0.0208344	0.378451	0.00379724	0.377703	0.00237117	{'classifier__max_depth': 10, 'classifier__min_samples_leaf': 5, 'classifier__min_samples_split': 20, 'classifier__n_estimators': 200}	61	robust	random_projection	extra_trees	-0.000748038
0.463819	0.0288	0.379136	0.00895892	0.379198	0.00798724	{'classifier__max_depth': 10, 'classifier__min_samples_leaf': 5, 'classifier__min_samples_split': 20, 'classifier__n_estimators': 300}	53	robust	random_projection	extra_trees	6.2768e-05
0.7658	0.0453001	0.378451	0.00485281	0.379124	0.00468694	{'classifier__max_depth': 10, 'classifier__min_samples_leaf': 5, 'classifier__min_samples_split': 20, 'classifier__n_estimators': 500}	61	robust	random_projection	extra_trees	0.000673558
0.1696	0.0130006	0.377104	0.00269475	0.377554	0.00339743	{'classifier__max_depth': 10, 'classifier__min_samples_leaf': 10, 'classifier__min_samples_split': 2, 'classifier__n_estimators': 100}	75	robust	random_projection	extra_trees	0.000449638
0.3101	0.0202001	0.38046	0.0120482	0.3795	0.00874503	{'classifier__max_depth': 10, 'classifier__min_samples_leaf': 10, 'classifier__min_samples_split': 2, 'classifier__n_estimators': 200}	46	robust	random_projection	extra_trees	-0.000959959
0.4528	0.0296509	0.376433	0.0020013	0.376431	0.000221608	{'classifier__max_depth': 10, 'classifier__min_samples_leaf': 10, 'classifier__min_samples_split': 2, 'classifier__n_estimators': 300}	82	robust	random_projection	extra_trees	-1.976e-06
0.736072	0.0423003	0.377104	0.00269475	0.377629	0.00362154	{'classifier__max_depth': 10, 'classifier__min_samples_leaf': 10, 'classifier__min_samples_split': 2, 'classifier__n_estimators': 500}	75	robust	random_projection	extra_trees	0.000524488
0.174534	0.0130159	0.376433	0.0020013	0.376431	0.000221608	{'classifier__max_depth': 10, 'classifier__min_samples_leaf': 10, 'classifier__min_samples_split': 10, 'classifier__n_estimators': 100}	82	robust	random_projection	extra_trees	-1.976e-06
0.314403	0.0206002	0.379807	0.00893818	0.380172	0.00748421	{'classifier__max_depth': 10, 'classifier__min_samples_leaf': 10, 'classifier__min_samples_split': 10, 'classifier__n_estimators': 200}	49	robust	random_projection	extra_trees	0.000365408
0.458495	0.0306002	0.376433	0.0020013	0.376431	0.000221608	{'classifier__max_depth': 10, 'classifier__min_samples_leaf': 10, 'classifier__min_samples_split': 10, 'classifier__n_estimators': 300}	82	robust	random_projection	extra_trees	-1.976e-06
0.739558	0.0436001	0.377775	0.00431577	0.37703	0.00183173	{'classifier__max_depth': 10, 'classifier__min_samples_leaf': 10, 'classifier__min_samples_split': 10, 'classifier__n_estimators': 500}	67	robust	random_projection	extra_trees	-0.000745454
0.169995	0.0130999	0.377109	0.00327765	0.377104	0.00195883	{'classifier__max_depth': 10, 'classifier__min_samples_leaf': 10, 'classifier__min_samples_split': 20, 'classifier__n_estimators': 100}	71	robust	random_projection	extra_trees	-4.502e-06
0.3127	0.0206	0.376433	0.0020013	0.376431	0.000221608	{'classifier__max_depth': 10, 'classifier__min_samples_leaf': 10, 'classifier__min_samples_split': 20, 'classifier__n_estimators': 200}	82	robust	random_projection	extra_trees	-1.976e-06
0.459368	0.0289168	0.376433	0.0020013	0.376431	0.000221608	{'classifier__max_depth': 10, 'classifier__min_samples_leaf': 10, 'classifier__min_samples_split': 20, 'classifier__n_estimators': 300}	82	robust	random_projection	extra_trees	-1.976e-06
0.74957	0.0433	0.376433	0.0020013	0.376431	0.000221608	{'classifier__max_depth': 10, 'classifier__min_samples_leaf': 10, 'classifier__min_samples_split': 20, 'classifier__n_estimators': 500}	82	robust	random_projection	extra_trees	-1.976e-06
0.172035	0.0133179	0.382473	0.0127686	0.382943	0.0132579	{'classifier__max_depth': 20, 'classifier__min_samples_leaf': 5, 'classifier__min_samples_split': 2, 'classifier__n_estimators': 100}	34	robust	random_projection	extra_trees	0.000469508
0.314173	0.0203	0.37778	0.00361836	0.3789	0.00441163	{'classifier__max_depth': 20, 'classifier__min_samples_leaf': 5, 'classifier__min_samples_split': 2, 'classifier__n_estimators': 200}	65	robust	random_projection	extra_trees	0.00112043
0.4737	0.0295998	0.376433	0.0020013	0.37673	0.000624516	{'classifier__max_depth': 20, 'classifier__min_samples_leaf': 5, 'classifier__min_samples_split': 2, 'classifier__n_estimators': 300}	82	robust	random_projection	extra_trees	0.000297201
0.759601	0.0443993	0.379118	0.00544456	0.380098	0.00565167	{'classifier__max_depth': 20, 'classifier__min_samples_leaf': 5, 'classifier__min_samples_split': 2, 'classifier__n_estimators': 500}	58	robust	random_projection	extra_trees	0.00098023
0.176	0.0132	0.381825	0.0118473	0.380022	0.00802746	{'classifier__max_depth': 20, 'classifier__min_samples_leaf': 5, 'classifier__min_samples_split': 10, 'classifier__n_estimators': 100}	35	robust	random_projection	extra_trees	-0.00180298
0.321	0.0211998	0.381154	0.00785041	0.385034	0.00843132	{'classifier__max_depth': 20, 'classifier__min_samples_leaf': 5, 'classifier__min_samples_split': 10, 'classifier__n_estimators': 200}	38	robust	random_projection	extra_trees	0.00388017
0.465756	0.0291003	0.379789	0.010068	0.379425	0.00784298	{'classifier__max_depth': 20, 'classifier__min_samples_leaf': 5, 'classifier__min_samples_split': 10, 'classifier__n_estimators': 300}	51	robust	random_projection	extra_trees	-0.000363668
0.768776	0.0434168	0.376433	0.0020013	0.37688	0.000956643	{'classifier__max_depth': 20, 'classifier__min_samples_leaf': 5, 'classifier__min_samples_split': 10, 'classifier__n_estimators': 500}	82	robust	random_projection	extra_trees	0.000447126
0.1737	0.0141003	0.378446	0.00448115	0.378452	0.00328821	{'classifier__max_depth': 20, 'classifier__min_samples_leaf': 5, 'classifier__min_samples_split': 20, 'classifier__n_estimators': 100}	63	robust	random_projection	extra_trees	5.504e-06
0.320917	0.0218508	0.382514	0.0133367	0.382863	0.0122591	{'classifier__max_depth': 20, 'classifier__min_samples_leaf': 5, 'classifier__min_samples_split': 20, 'classifier__n_estimators': 200}	31	robust	random_projection	extra_trees	0.00034931
0.460667	0.0301999	0.377104	0.00269475	0.378153	0.00471636	{'classifier__max_depth': 20, 'classifier__min_samples_leaf': 5, 'classifier__min_samples_split': 20, 'classifier__n_estimators': 300}	75	robust	random_projection	extra_trees	0.00104844
0.7463	0.0426996	0.377104	0.00269475	0.377553	0.00199291	{'classifier__max_depth': 20, 'classifier__min_samples_leaf': 5, 'classifier__min_samples_split': 20, 'classifier__n_estimators': 500}	75	robust	random_projection	extra_trees	0.000448966
0.1706	0.0135002	0.381163	0.014958	0.379573	0.00863387	{'classifier__max_depth': 20, 'classifier__min_samples_leaf': 10, 'classifier__min_samples_split': 2, 'classifier__n_estimators': 100}	36	robust	random_projection	extra_trees	-0.00159018
0.3106	0.0203002	0.376433	0.0020013	0.376431	0.000221608	{'classifier__max_depth': 20, 'classifier__min_samples_leaf': 10, 'classifier__min_samples_split': 2, 'classifier__n_estimators': 200}	82	robust	random_projection	extra_trees	-1.976e-06
0.458407	0.0286002	0.376433	0.0020013	0.376431	0.000221608	{'classifier__max_depth': 20, 'classifier__min_samples_leaf': 10, 'classifier__min_samples_split': 2, 'classifier__n_estimators': 300}	82	robust	random_projection	extra_trees	-1.976e-06
0.73968	0.0464992	0.376433	0.0020013	0.376431	0.000221608	{'classifier__max_depth': 20, 'classifier__min_samples_leaf': 10, 'classifier__min_samples_split': 2, 'classifier__n_estimators': 500}	82	robust	random_projection	extra_trees	-1.976e-06
0.171726	0.0145179	0.379122	0.00648959	0.379949	0.00895698	{'classifier__max_depth': 20, 'classifier__min_samples_leaf': 10, 'classifier__min_samples_split': 10, 'classifier__n_estimators': 100}	57	robust	random_projection	extra_trees	0.000826498
0.3108	0.0211998	0.379131	0.004692	0.378974	0.00666238	{'classifier__max_depth': 20, 'classifier__min_samples_leaf': 10, 'classifier__min_samples_split': 10, 'classifier__n_estimators': 200}	54	robust	random_projection	extra_trees	-0.000156857
0.4608	0.0298994	0.381163	0.014958	0.379198	0.00728102	{'classifier__max_depth': 20, 'classifier__min_samples_leaf': 10, 'classifier__min_samples_split': 10, 'classifier__n_estimators': 300}	36	robust	random_projection	extra_trees	-0.00196431
0.7546	0.0452001	0.377104	0.00269475	0.378003	0.00405493	{'classifier__max_depth': 20, 'classifier__min_samples_leaf': 10, 'classifier__min_samples_split': 10, 'classifier__n_estimators': 500}	75	robust	random_projection	extra_trees	0.000898739
0.1753	0.0130999	0.380478	0.00936095	0.382342	0.00958086	{'classifier__max_depth': 20, 'classifier__min_samples_leaf': 10, 'classifier__min_samples_split': 20, 'classifier__n_estimators': 100}	41	robust	random_projection	extra_trees	0.00186381
0.3116	0.0212	0.381131	0.0140379	0.379425	0.00900674	{'classifier__max_depth': 20, 'classifier__min_samples_leaf': 10, 'classifier__min_samples_split': 20, 'classifier__n_estimators': 200}	40	robust	random_projection	extra_trees	-0.00170595
0.414975	0.0205998	0.376433	0.0020013	0.376431	0.000221608	{'classifier__max_depth': 20, 'classifier__min_samples_leaf': 10, 'classifier__min_samples_split': 20, 'classifier__n_estimators': 300}	82	robust	random_projection	extra_trees	-1.976e-06
0.567848	0.0241997	0.377109	0.00327765	0.378002	0.00464491	{'classifier__max_depth': 20, 'classifier__min_samples_leaf': 10, 'classifier__min_samples_split': 20, 'classifier__n_estimators': 500}	71	robust	random_projection	extra_trees	0.00089303
261271348	0.00531745	0.406775	0.0342057	0.431869	0.0254082	{'classifier__alpha': 0.0001, 'classifier__hidden_layer_sizes': (50,)}	6	robust	random_projection	mlp	0.025094
286323247	0.0053	0.393266	0.0185857	0.418182	0.0177111	{'classifier__alpha': 0.001, 'classifier__hidden_layer_sizes': (50,)}	9	robust	random_projection	mlp	0.024916
218030684	0.00559979	0.405414	0.0311519	0.422671	0.0317914	{'classifier__alpha': 0.001, 'classifier__hidden_layer_sizes': (100,)}	7	robust	random_projection	mlp	0.0172566
2687652469	0.00569985	0.407337	0.0318061	0.431357	0.0302421	{'classifier__alpha': 0.01, 'classifier__hidden_layer_sizes': (50,)}	5	robust	random_projection	mlp	0.0240199
232491169	0.00420027	0.415468	0.0400611	0.438541	0.0314103	{'classifier__alpha': 0.01, 'classifier__hidden_layer_sizes': (100,)}	1	robust	random_projection	mlp	0.0230725
0.0568999	0.00989986	0.463985	0.0220115	0.472278	0.00661291	{'classifier__C': 10, 'classifier__gamma': 'scale'}	1	normalizer	pca	svm_linear	0.00829322
0.0533989	0.00760088	0.463985	0.0220115	0.472278	0.00661291	{'classifier__C': 10, 'classifier__gamma': 'auto'}	1	normalizer	pca	svm_linear	0.00829322
387443893	0.00450013	0.466715	0.0203769	0.471755	0.00305405	{'classifier__alpha': 0.01, 'classifier__hidden_layer_sizes': (100,)}	1	maxabs	truncatedsvd	mlp	0.00503958
0.0344009	0.00420046	0.470048	0.0225464	0.471306	0.00173991	{'classifier__C': 10, 'classifier__penalty': 'l1', 'classifier__solver': 'liblinear'}	1	standard	ica	logistic_regression	0.00125756
0.0225983	0.00340023	0.470719	0.022827	0.471306	0.0017566	{'classifier__C': 10, 'classifier__penalty': 'l2', 'classifier__solver': 'liblinear'}	1	standard	pca	logistic_regression	0.000586366
0.025099	0.00349965	0.470719	0.022827	0.471306	0.0017566	{'classifier__C': 10, 'classifier__penalty': 'l2', 'classifier__solver': 'liblinear'}	1	standard	truncatedsvd	logistic_regression	0.000586366
0.124512	0.0292136	0.376433	0.0020013	0.376431	0.000221608	{'classifier__C': 0.1, 'classifier__gamma': 'scale'}	4	robust	truncatedsvd	svm_rbf	-1.976e-06
0.243939	0.0331135	0.376433	0.0020013	0.376431	0.000221608	{'classifier__C': 0.1, 'classifier__gamma': 'auto'}	4	robust	truncatedsvd	svm_rbf	-1.976e-06
0.165166	0.0311001	0.377109	0.00444427	0.383614	0.00449861	{'classifier__C': 1, 'classifier__gamma': 'scale'}	2	robust	truncatedsvd	svm_rbf	0.0065054
0.026497	0.00339992	0.470048	0.023904	0.471006	0.001813	{'classifier__C': 10, 'classifier__penalty': 'l2', 'classifier__solver': 'liblinear'}	1	standard	ica	logistic_regression	0.000958218
0.360372	0.0347183	0.461273	0.0204881	0.470184	0.0187657	{}	1	quantile-normal	modified_lle	lda	0.00891103
0.141397	0.0150013	0.35287	0.0250038	0.34755	0.0107464	{'classifier__C': 0.1, 'classifier__gamma': 'auto'}	2	robust	truncatedsvd	svm_sigmoid	-0.00532079
0.126038	0.0122011	0.323871	0.021471	0.330717	0.0159672	{'classifier__C': 1, 'classifier__gamma': 'scale'}	3	robust	truncatedsvd	svm_sigmoid	0.00684604
0.130498	0.0137008	0.31043	0.0161471	0.301081	0.0153517	{'classifier__C': 1, 'classifier__gamma': 'auto'}	5	robust	truncatedsvd	svm_sigmoid	-0.00934846
0.126301	0.0143991	0.319159	0.0246023	0.316274	0.0116615	{'classifier__C': 10, 'classifier__gamma': 'scale'}	4	robust	truncatedsvd	svm_sigmoid	-0.00288573
0.111029	0.0118003	0.283516	0.0244806	0.279083	0.0219076	{'classifier__C': 10, 'classifier__gamma': 'auto'}	6	robust	truncatedsvd	svm_sigmoid	-0.00443356
0.0268015	0.00440021	0.373068	0.0101627	0.380097	0.00356161	{'classifier__C': 0.1, 'classifier__penalty': 'l1', 'classifier__solver': 'liblinear'}	2	robust	truncatedsvd	logistic_regression	0.00702839
2356446242	0.00961664	0.463282	0.0182422	0.469434	0.0040429	{'classifier__alpha': 0.001, 'classifier__hidden_layer_sizes': (50, 50)}	1	quantile-uniform	truncatedsvd	mlp	0.00615202
0.0287004	0.00429964	0.373068	0.0101627	0.379573	0.00447143	{'classifier__C': 1, 'classifier__penalty': 'l1', 'classifier__solver': 'liblinear'}	2	robust	truncatedsvd	logistic_regression	0.00650466
0.0342989	0.0046006	0.373068	0.0101627	0.379648	0.00441567	{'classifier__C': 1, 'classifier__penalty': 'l2', 'classifier__solver': 'liblinear'}	2	robust	truncatedsvd	logistic_regression	0.0065794
0.033401	0.00429919	0.373068	0.0101627	0.379573	0.00461468	{'classifier__C': 10, 'classifier__penalty': 'l1', 'classifier__solver': 'liblinear'}	2	robust	truncatedsvd	logistic_regression	0.00650461
0.0320965	0.00320032	0.373068	0.0101627	0.379573	0.00461468	{'classifier__C': 10, 'classifier__penalty': 'l2', 'classifier__solver': 'liblinear'}	2	robust	truncatedsvd	logistic_regression	0.00650461
0.597873	0.0291998	0.468715	0.0111976	0.467715	0.00605107	{'classifier__C': 10, 'classifier__gamma': 'scale'}	1	quantile-uniform	modified_lle	svm_linear	-0.000999968
0.0191978	0.00320005	0.362235	0.0430354	0.369702	0.0358999	{}	1	robust	truncatedsvd	gaussian_nb	0.0074672
0.1659	0.0126004	0.376433	0.0020013	0.376431	0.000221608	{'classifier__max_depth': None, 'classifier__min_samples_leaf': 5, 'classifier__min_samples_split': 2, 'classifier__n_estimators': 100}	28	robust	truncatedsvd	extra_trees	-1.976e-06
0.314174	0.0202	0.376433	0.0020013	0.376431	0.000221608	{'classifier__max_depth': None, 'classifier__min_samples_leaf': 5, 'classifier__min_samples_split': 2, 'classifier__n_estimators': 200}	28	robust	truncatedsvd	extra_trees	-1.976e-06
0.454565	0.0273	0.376433	0.0020013	0.376431	0.000221608	{'classifier__max_depth': None, 'classifier__min_samples_leaf': 5, 'classifier__min_samples_split': 2, 'classifier__n_estimators': 300}	28	robust	truncatedsvd	extra_trees	-1.976e-06
0.735859	0.0445	0.376433	0.0020013	0.376431	0.000221608	{'classifier__max_depth': None, 'classifier__min_samples_leaf': 5, 'classifier__min_samples_split': 2, 'classifier__n_estimators': 500}	28	robust	truncatedsvd	extra_trees	-1.976e-06
0.170448	0.0129999	0.376433	0.0020013	0.376431	0.000221608	{'classifier__max_depth': None, 'classifier__min_samples_leaf': 5, 'classifier__min_samples_split': 10, 'classifier__n_estimators': 100}	28	robust	truncatedsvd	extra_trees	-1.976e-06
0.3082	0.0208002	0.376433	0.0020013	0.376431	0.000221608	{'classifier__max_depth': None, 'classifier__min_samples_leaf': 5, 'classifier__min_samples_split': 10, 'classifier__n_estimators': 200}	28	robust	truncatedsvd	extra_trees	-1.976e-06
0.4579	0.0288003	0.376433	0.0020013	0.376431	0.000221608	{'classifier__max_depth': None, 'classifier__min_samples_leaf': 5, 'classifier__min_samples_split': 10, 'classifier__n_estimators': 300}	28	robust	truncatedsvd	extra_trees	-1.976e-06
0.7586	0.0441003	0.376433	0.0020013	0.376431	0.000221608	{'classifier__max_depth': None, 'classifier__min_samples_leaf': 5, 'classifier__min_samples_split': 10, 'classifier__n_estimators': 500}	28	robust	truncatedsvd	extra_trees	-1.976e-06
0.1683	0.0125	0.376433	0.0020013	0.376431	0.000221608	{'classifier__max_depth': None, 'classifier__min_samples_leaf': 5, 'classifier__min_samples_split': 20, 'classifier__n_estimators': 100}	28	robust	truncatedsvd	extra_trees	-1.976e-06
0.3078	0.0201001	0.376433	0.0020013	0.376431	0.000221608	{'classifier__max_depth': None, 'classifier__min_samples_leaf': 5, 'classifier__min_samples_split': 20, 'classifier__n_estimators': 200}	28	robust	truncatedsvd	extra_trees	-1.976e-06
0.4634	0.0274001	0.376433	0.0020013	0.376431	0.000221608	{'classifier__max_depth': None, 'classifier__min_samples_leaf': 5, 'classifier__min_samples_split': 20, 'classifier__n_estimators': 300}	28	robust	truncatedsvd	extra_trees	-1.976e-06
0.761551	0.0433799	0.376433	0.0020013	0.376431	0.000221608	{'classifier__max_depth': None, 'classifier__min_samples_leaf': 5, 'classifier__min_samples_split': 20, 'classifier__n_estimators': 500}	28	robust	truncatedsvd	extra_trees	-1.976e-06
0.1777	0.0141	0.376433	0.0020013	0.376431	0.000221608	{'classifier__max_depth': None, 'classifier__min_samples_leaf': 10, 'classifier__min_samples_split': 2, 'classifier__n_estimators': 100}	28	robust	truncatedsvd	extra_trees	-1.976e-06
0.305199	0.0209172	0.376433	0.0020013	0.376431	0.000221608	{'classifier__max_depth': None, 'classifier__min_samples_leaf': 10, 'classifier__min_samples_split': 2, 'classifier__n_estimators': 200}	28	robust	truncatedsvd	extra_trees	-1.976e-06
0.454526	0.0276367	0.376433	0.0020013	0.376431	0.000221608	{'classifier__max_depth': None, 'classifier__min_samples_leaf': 10, 'classifier__min_samples_split': 2, 'classifier__n_estimators': 300}	28	robust	truncatedsvd	extra_trees	-1.976e-06
0.750316	0.0424329	0.376433	0.0020013	0.376431	0.000221608	{'classifier__max_depth': None, 'classifier__min_samples_leaf': 10, 'classifier__min_samples_split': 2, 'classifier__n_estimators': 500}	28	robust	truncatedsvd	extra_trees	-1.976e-06
0.170729	0.0132999	0.376433	0.0020013	0.376431	0.000221608	{'classifier__max_depth': None, 'classifier__min_samples_leaf': 10, 'classifier__min_samples_split': 10, 'classifier__n_estimators': 100}	28	robust	truncatedsvd	extra_trees	-1.976e-06
0.317782	0.0209164	0.376433	0.0020013	0.376431	0.000221608	{'classifier__max_depth': None, 'classifier__min_samples_leaf': 10, 'classifier__min_samples_split': 10, 'classifier__n_estimators': 200}	28	robust	truncatedsvd	extra_trees	-1.976e-06
0.454114	0.0278001	0.376433	0.0020013	0.376431	0.000221608	{'classifier__max_depth': None, 'classifier__min_samples_leaf': 10, 'classifier__min_samples_split': 10, 'classifier__n_estimators': 300}	28	robust	truncatedsvd	extra_trees	-1.976e-06
0.7419	0.0438991	0.376433	0.0020013	0.376431	0.000221608	{'classifier__max_depth': None, 'classifier__min_samples_leaf': 10, 'classifier__min_samples_split': 10, 'classifier__n_estimators': 500}	28	robust	truncatedsvd	extra_trees	-1.976e-06
0.1704	0.0129	0.376433	0.0020013	0.376431	0.000221608	{'classifier__max_depth': None, 'classifier__min_samples_leaf': 10, 'classifier__min_samples_split': 20, 'classifier__n_estimators': 100}	28	robust	truncatedsvd	extra_trees	-1.976e-06
0.3114	0.0215	0.376433	0.0020013	0.376431	0.000221608	{'classifier__max_depth': None, 'classifier__min_samples_leaf': 10, 'classifier__min_samples_split': 20, 'classifier__n_estimators': 200}	28	robust	truncatedsvd	extra_trees	-1.976e-06
0.451165	0.0280002	0.376433	0.0020013	0.376431	0.000221608	{'classifier__max_depth': None, 'classifier__min_samples_leaf': 10, 'classifier__min_samples_split': 20, 'classifier__n_estimators': 300}	28	robust	truncatedsvd	extra_trees	-1.976e-06
0.73597	0.0422003	0.376433	0.0020013	0.376431	0.000221608	{'classifier__max_depth': None, 'classifier__min_samples_leaf': 10, 'classifier__min_samples_split': 20, 'classifier__n_estimators': 500}	28	robust	truncatedsvd	extra_trees	-1.976e-06
0.34	0.0221	0.383838	0.00990958	0.412046	0.00764631	{'classifier__max_depth': 10, 'classifier__min_samples_leaf': 1, 'classifier__min_samples_split': 10, 'classifier__n_estimators': 200}	12	robust	truncatedsvd	extra_trees	0.0282074
0.508481	0.0302162	0.3825	0.0110194	0.412045	0.00766865	{'classifier__max_depth': 10, 'classifier__min_samples_leaf': 1, 'classifier__min_samples_split': 10, 'classifier__n_estimators': 300}	16	robust	truncatedsvd	extra_trees	0.029545
0.187113	0.0133998	0.3825	0.0101691	0.403291	0.00505093	{'classifier__max_depth': 10, 'classifier__min_samples_leaf': 1, 'classifier__min_samples_split': 20, 'classifier__n_estimators': 100}	16	robust	truncatedsvd	extra_trees	0.0207909
0.3426	0.0216	0.383172	0.0103697	0.404114	0.00611656	{'classifier__max_depth': 10, 'classifier__min_samples_leaf': 1, 'classifier__min_samples_split': 20, 'classifier__n_estimators': 200}	13	robust	truncatedsvd	extra_trees	0.0209428
0.495168	0.0306001	0.383172	0.0103697	0.404563	0.00586431	{'classifier__max_depth': 10, 'classifier__min_samples_leaf': 1, 'classifier__min_samples_split': 20, 'classifier__n_estimators': 300}	13	robust	truncatedsvd	extra_trees	0.0213918
0.807392	0.0531996	0.383847	0.00932206	0.40404	0.00573227	{'classifier__max_depth': 10, 'classifier__min_samples_leaf': 1, 'classifier__min_samples_split': 20, 'classifier__n_estimators': 500}	11	robust	truncatedsvd	extra_trees	0.0201922
0.171001	0.0131999	0.376433	0.0020013	0.376431	0.000221608	{'classifier__max_depth': 10, 'classifier__min_samples_leaf': 5, 'classifier__min_samples_split': 2, 'classifier__n_estimators': 100}	28	robust	truncatedsvd	extra_trees	-1.976e-06
0.309876	0.0202	0.376433	0.0020013	0.376431	0.000221608	{'classifier__max_depth': 10, 'classifier__min_samples_leaf': 5, 'classifier__min_samples_split': 2, 'classifier__n_estimators': 200}	28	robust	truncatedsvd	extra_trees	-1.976e-06
0.463352	0.0273	0.376433	0.0020013	0.376431	0.000221608	{'classifier__max_depth': 10, 'classifier__min_samples_leaf': 5, 'classifier__min_samples_split': 2, 'classifier__n_estimators': 300}	28	robust	truncatedsvd	extra_trees	-1.976e-06
0.741356	0.0437001	0.376433	0.0020013	0.376431	0.000221608	{'classifier__max_depth': 10, 'classifier__min_samples_leaf': 5, 'classifier__min_samples_split': 2, 'classifier__n_estimators': 500}	28	robust	truncatedsvd	extra_trees	-1.976e-06
0.1684	0.0126998	0.376433	0.0020013	0.376431	0.000221608	{'classifier__max_depth': 10, 'classifier__min_samples_leaf': 5, 'classifier__min_samples_split': 10, 'classifier__n_estimators': 100}	28	robust	truncatedsvd	extra_trees	-1.976e-06
0.314156	0.0222001	0.376433	0.0020013	0.376431	0.000221608	{'classifier__max_depth': 10, 'classifier__min_samples_leaf': 5, 'classifier__min_samples_split': 10, 'classifier__n_estimators': 200}	28	robust	truncatedsvd	extra_trees	-1.976e-06
0.454962	0.0288998	0.376433	0.0020013	0.376431	0.000221608	{'classifier__max_depth': 10, 'classifier__min_samples_leaf': 5, 'classifier__min_samples_split': 10, 'classifier__n_estimators': 300}	28	robust	truncatedsvd	extra_trees	-1.976e-06
0.7437	0.0423002	0.376433	0.0020013	0.376431	0.000221608	{'classifier__max_depth': 10, 'classifier__min_samples_leaf': 5, 'classifier__min_samples_split': 10, 'classifier__n_estimators': 500}	28	robust	truncatedsvd	extra_trees	-1.976e-06
0.1691	0.0125	0.376433	0.0020013	0.376431	0.000221608	{'classifier__max_depth': 10, 'classifier__min_samples_leaf': 5, 'classifier__min_samples_split': 20, 'classifier__n_estimators': 100}	28	robust	truncatedsvd	extra_trees	-1.976e-06
0.3095	0.0217001	0.376433	0.0020013	0.376431	0.000221608	{'classifier__max_depth': 10, 'classifier__min_samples_leaf': 5, 'classifier__min_samples_split': 20, 'classifier__n_estimators': 200}	28	robust	truncatedsvd	extra_trees	-1.976e-06
0.455419	0.0276001	0.376433	0.0020013	0.376431	0.000221608	{'classifier__max_depth': 10, 'classifier__min_samples_leaf': 5, 'classifier__min_samples_split': 20, 'classifier__n_estimators': 300}	28	robust	truncatedsvd	extra_trees	-1.976e-06
0.741534	0.0434002	0.376433	0.0020013	0.376431	0.000221608	{'classifier__max_depth': 10, 'classifier__min_samples_leaf': 5, 'classifier__min_samples_split': 20, 'classifier__n_estimators': 500}	28	robust	truncatedsvd	extra_trees	-1.976e-06
0.171951	0.0126	0.376433	0.0020013	0.376431	0.000221608	{'classifier__max_depth': 10, 'classifier__min_samples_leaf': 10, 'classifier__min_samples_split': 2, 'classifier__n_estimators': 100}	28	robust	truncatedsvd	extra_trees	-1.976e-06
0.30853	0.0208166	0.376433	0.0020013	0.376431	0.000221608	{'classifier__max_depth': 10, 'classifier__min_samples_leaf': 10, 'classifier__min_samples_split': 2, 'classifier__n_estimators': 200}	28	robust	truncatedsvd	extra_trees	-1.976e-06
0.455361	0.0291001	0.376433	0.0020013	0.376431	0.000221608	{'classifier__max_depth': 10, 'classifier__min_samples_leaf': 10, 'classifier__min_samples_split': 2, 'classifier__n_estimators': 300}	28	robust	truncatedsvd	extra_trees	-1.976e-06
0.746217	0.0441001	0.376433	0.0020013	0.376431	0.000221608	{'classifier__max_depth': 10, 'classifier__min_samples_leaf': 10, 'classifier__min_samples_split': 2, 'classifier__n_estimators': 500}	28	robust	truncatedsvd	extra_trees	-1.976e-06
0.176397	0.0125002	0.376433	0.0020013	0.376431	0.000221608	{'classifier__max_depth': 10, 'classifier__min_samples_leaf': 10, 'classifier__min_samples_split': 10, 'classifier__n_estimators': 100}	28	robust	truncatedsvd	extra_trees	-1.976e-06
0.319741	0.0201148	0.376433	0.0020013	0.376431	0.000221608	{'classifier__max_depth': 10, 'classifier__min_samples_leaf': 10, 'classifier__min_samples_split': 10, 'classifier__n_estimators': 200}	28	robust	truncatedsvd	extra_trees	-1.976e-06
0.446877	0.0286	0.376433	0.0020013	0.376431	0.000221608	{'classifier__max_depth': 10, 'classifier__min_samples_leaf': 10, 'classifier__min_samples_split': 10, 'classifier__n_estimators': 300}	28	robust	truncatedsvd	extra_trees	-1.976e-06
0.736701	0.0452001	0.376433	0.0020013	0.376431	0.000221608	{'classifier__max_depth': 10, 'classifier__min_samples_leaf': 10, 'classifier__min_samples_split': 10, 'classifier__n_estimators': 500}	28	robust	truncatedsvd	extra_trees	-1.976e-06
0.173001	0.0129	0.376433	0.0020013	0.376431	0.000221608	{'classifier__max_depth': 10, 'classifier__min_samples_leaf': 10, 'classifier__min_samples_split': 20, 'classifier__n_estimators': 100}	28	robust	truncatedsvd	extra_trees	-1.976e-06
0.3112	0.0195002	0.376433	0.0020013	0.376431	0.000221608	{'classifier__max_depth': 10, 'classifier__min_samples_leaf': 10, 'classifier__min_samples_split': 20, 'classifier__n_estimators': 200}	28	robust	truncatedsvd	extra_trees	-1.976e-06
0.4515	0.0274002	0.376433	0.0020013	0.376431	0.000221608	{'classifier__max_depth': 10, 'classifier__min_samples_leaf': 10, 'classifier__min_samples_split': 20, 'classifier__n_estimators': 300}	28	robust	truncatedsvd	extra_trees	-1.976e-06
0.726081	0.0404998	0.376433	0.0020013	0.376431	0.000221608	{'classifier__max_depth': 10, 'classifier__min_samples_leaf': 10, 'classifier__min_samples_split': 20, 'classifier__n_estimators': 500}	28	robust	truncatedsvd	extra_trees	-1.976e-06
0.166299	0.0124997	0.376433	0.0020013	0.376431	0.000221608	{'classifier__max_depth': 20, 'classifier__min_samples_leaf': 5, 'classifier__min_samples_split': 2, 'classifier__n_estimators': 100}	28	robust	truncatedsvd	extra_trees	-1.976e-06
0.3036	0.0195001	0.376433	0.0020013	0.376431	0.000221608	{'classifier__max_depth': 20, 'classifier__min_samples_leaf': 5, 'classifier__min_samples_split': 2, 'classifier__n_estimators': 200}	28	robust	truncatedsvd	extra_trees	-1.976e-06
0.4464	0.0273002	0.376433	0.0020013	0.376431	0.000221608	{'classifier__max_depth': 20, 'classifier__min_samples_leaf': 5, 'classifier__min_samples_split': 2, 'classifier__n_estimators': 300}	28	robust	truncatedsvd	extra_trees	-1.976e-06
0.726299	0.0441997	0.376433	0.0020013	0.376431	0.000221608	{'classifier__max_depth': 20, 'classifier__min_samples_leaf': 5, 'classifier__min_samples_split': 2, 'classifier__n_estimators': 500}	28	robust	truncatedsvd	extra_trees	-1.976e-06
0.172099	0.0130003	0.376433	0.0020013	0.376431	0.000221608	{'classifier__max_depth': 20, 'classifier__min_samples_leaf': 5, 'classifier__min_samples_split': 10, 'classifier__n_estimators': 100}	28	robust	truncatedsvd	extra_trees	-1.976e-06
0.313101	0.0198999	0.376433	0.0020013	0.376431	0.000221608	{'classifier__max_depth': 20, 'classifier__min_samples_leaf': 5, 'classifier__min_samples_split': 10, 'classifier__n_estimators': 200}	28	robust	truncatedsvd	extra_trees	-1.976e-06
0.458702	0.0287996	0.376433	0.0020013	0.376431	0.000221608	{'classifier__max_depth': 20, 'classifier__min_samples_leaf': 5, 'classifier__min_samples_split': 10, 'classifier__n_estimators': 300}	28	robust	truncatedsvd	extra_trees	-1.976e-06
0.747471	0.0459001	0.376433	0.0020013	0.376431	0.000221608	{'classifier__max_depth': 20, 'classifier__min_samples_leaf': 5, 'classifier__min_samples_split': 10, 'classifier__n_estimators': 500}	28	robust	truncatedsvd	extra_trees	-1.976e-06
0.172303	0.0141998	0.376433	0.0020013	0.376431	0.000221608	{'classifier__max_depth': 20, 'classifier__min_samples_leaf': 5, 'classifier__min_samples_split': 20, 'classifier__n_estimators': 100}	28	robust	truncatedsvd	extra_trees	-1.976e-06
0.3325	0.0213001	0.376433	0.0020013	0.376431	0.000221608	{'classifier__max_depth': 20, 'classifier__min_samples_leaf': 5, 'classifier__min_samples_split': 20, 'classifier__n_estimators': 200}	28	robust	truncatedsvd	extra_trees	-1.976e-06
0.4626	0.0287998	0.376433	0.0020013	0.376431	0.000221608	{'classifier__max_depth': 20, 'classifier__min_samples_leaf': 5, 'classifier__min_samples_split': 20, 'classifier__n_estimators': 300}	28	robust	truncatedsvd	extra_trees	-1.976e-06
0.7467	0.0442994	0.376433	0.0020013	0.376431	0.000221608	{'classifier__max_depth': 20, 'classifier__min_samples_leaf': 5, 'classifier__min_samples_split': 20, 'classifier__n_estimators': 500}	28	robust	truncatedsvd	extra_trees	-1.976e-06
0.1703	0.0126997	0.376433	0.0020013	0.376431	0.000221608	{'classifier__max_depth': 20, 'classifier__min_samples_leaf': 10, 'classifier__min_samples_split': 2, 'classifier__n_estimators': 100}	28	robust	truncatedsvd	extra_trees	-1.976e-06
0.3075	0.0205	0.376433	0.0020013	0.376431	0.000221608	{'classifier__max_depth': 20, 'classifier__min_samples_leaf': 10, 'classifier__min_samples_split': 2, 'classifier__n_estimators': 200}	28	robust	truncatedsvd	extra_trees	-1.976e-06
0.450683	0.0283205	0.376433	0.0020013	0.376431	0.000221608	{'classifier__max_depth': 20, 'classifier__min_samples_leaf': 10, 'classifier__min_samples_split': 2, 'classifier__n_estimators': 300}	28	robust	truncatedsvd	extra_trees	-1.976e-06
0.748308	0.0441994	0.376433	0.0020013	0.376431	0.000221608	{'classifier__max_depth': 20, 'classifier__min_samples_leaf': 10, 'classifier__min_samples_split': 2, 'classifier__n_estimators': 500}	28	robust	truncatedsvd	extra_trees	-1.976e-06
0.176025	0.0124995	0.376433	0.0020013	0.376431	0.000221608	{'classifier__max_depth': 20, 'classifier__min_samples_leaf': 10, 'classifier__min_samples_split': 10, 'classifier__n_estimators': 100}	28	robust	truncatedsvd	extra_trees	-1.976e-06
0.309021	0.0204998	0.376433	0.0020013	0.376431	0.000221608	{'classifier__max_depth': 20, 'classifier__min_samples_leaf': 10, 'classifier__min_samples_split': 10, 'classifier__n_estimators': 200}	28	robust	truncatedsvd	extra_trees	-1.976e-06
0.4556	0.0285005	0.376433	0.0020013	0.376431	0.000221608	{'classifier__max_depth': 20, 'classifier__min_samples_leaf': 10, 'classifier__min_samples_split': 10, 'classifier__n_estimators': 300}	28	robust	truncatedsvd	extra_trees	-1.976e-06
0.736103	0.0436977	0.376433	0.0020013	0.376431	0.000221608	{'classifier__max_depth': 20, 'classifier__min_samples_leaf': 10, 'classifier__min_samples_split': 10, 'classifier__n_estimators': 500}	28	robust	truncatedsvd	extra_trees	-1.976e-06
0.172	0.0136998	0.376433	0.0020013	0.376431	0.000221608	{'classifier__max_depth': 20, 'classifier__min_samples_leaf': 10, 'classifier__min_samples_split': 20, 'classifier__n_estimators': 100}	28	robust	truncatedsvd	extra_trees	-1.976e-06
0.312	0.0206006	0.376433	0.0020013	0.376431	0.000221608	{'classifier__max_depth': 20, 'classifier__min_samples_leaf': 10, 'classifier__min_samples_split': 20, 'classifier__n_estimators': 200}	28	robust	truncatedsvd	extra_trees	-1.976e-06
0.4186	0.0202992	0.376433	0.0020013	0.376431	0.000221608	{'classifier__max_depth': 20, 'classifier__min_samples_leaf': 10, 'classifier__min_samples_split': 20, 'classifier__n_estimators': 300}	28	robust	truncatedsvd	extra_trees	-1.976e-06
0.562702	0.0235999	0.376433	0.0020013	0.376431	0.000221608	{'classifier__max_depth': 20, 'classifier__min_samples_leaf': 10, 'classifier__min_samples_split': 20, 'classifier__n_estimators': 500}	28	robust	truncatedsvd	extra_trees	-1.976e-06
2555942702	0.00519967	0.379108	0.00826128	0.393491	0.00979931	{'classifier__alpha': 0.0001, 'classifier__hidden_layer_sizes': (50,)}	3	robust	truncatedsvd	mlp	0.0143826
2645899725	0.00519979	0.377775	0.00854658	0.392967	0.00946427	{'classifier__alpha': 0.0001, 'classifier__hidden_layer_sizes': (100,)}	6	robust	truncatedsvd	mlp	0.0151922
0.472401	0.0220007	0.468715	0.0111976	0.467715	0.00592023	{'classifier__C': 10, 'classifier__gamma': 'auto'}	1	quantile-uniform	modified_lle	svm_linear	-0.000999968
2880964351	0.00530009	0.377118	0.0079291	0.391995	0.00964666	{'classifier__alpha': 0.001, 'classifier__hidden_layer_sizes': (50,)}	7	robust	truncatedsvd	mlp	0.0148773
2707490683	0.00490027	0.378455	0.00671089	0.393267	0.0110808	{'classifier__alpha': 0.001, 'classifier__hidden_layer_sizes': (100,)}	5	robust	truncatedsvd	mlp	0.0148118
2088703465	0.00530012	0.380501	0.0166623	0.399328	0.0187574	{'classifier__alpha': 0.001, 'classifier__hidden_layer_sizes': (50, 50)}	2	robust	truncatedsvd	mlp	0.0188276
2492881894	0.00480058	0.375077	0.00547216	0.39192	0.00953574	{'classifier__alpha': 0.01, 'classifier__hidden_layer_sizes': (50,)}	8	robust	truncatedsvd	mlp	0.0168428
2195084262	0.00429985	0.373748	0.00795565	0.391471	0.0107413	{'classifier__alpha': 0.01, 'classifier__hidden_layer_sizes': (100,)}	9	robust	truncatedsvd	mlp	0.0177228
1804483557	0.0035001	0.378469	0.0124411	0.404865	0.0165075	{'classifier__alpha': 0.01, 'classifier__hidden_layer_sizes': (50, 50)}	4	robust	truncatedsvd	mlp	0.0263959
101880184	0.0287982	0.432247	0.0518905	0.437193	0.0508702	{'classifier__C': 0.1, 'classifier__gamma': 'scale'}	3	robust	isomap	svm_linear	0.00494625
9919416041	0.0200992	0.432247	0.0518905	0.437193	0.0508702	{'classifier__C': 0.1, 'classifier__gamma': 'auto'}	3	robust	isomap	svm_linear	0.00494625
2875206156	0.0204994	0.432247	0.0518905	0.437267	0.0509628	{'classifier__C': 1, 'classifier__gamma': 'scale'}	3	robust	isomap	svm_linear	0.00502099
2838557571	0.0211149	0.432247	0.0518905	0.437267	0.0509628	{'classifier__C': 1, 'classifier__gamma': 'auto'}	3	robust	isomap	svm_linear	0.00502099
5553808446	0.0174004	0.433593	0.0521044	0.437043	0.0507581	{'classifier__C': 10, 'classifier__gamma': 'scale'}	1	robust	isomap	svm_linear	0.00344968
5538298253	0.0170995	0.433593	0.0521044	0.437043	0.0507581	{'classifier__C': 10, 'classifier__gamma': 'auto'}	1	robust	isomap	svm_linear	0.00344968
1004722881	0.0581196	0.416783	0.0349236	0.422302	0.0405452	{'classifier__C': 0.1, 'classifier__gamma': 'scale'}	4	robust	isomap	svm_rbf	0.00551942
1318200135	0.0472008	0.382482	0.0098911	0.384662	0.00804918	{'classifier__C': 0.1, 'classifier__gamma': 'auto'}	6	robust	isomap	svm_rbf	0.00217948
0.968866	0.0386194	0.437013	0.0442367	0.44819	0.0500972	{'classifier__C': 1, 'classifier__gamma': 'scale'}	2	robust	isomap	svm_rbf	0.0111776
0.889663	0.0426329	0.447134	0.0435991	0.463303	0.04975	{'classifier__C': 10, 'classifier__gamma': 'scale'}	1	robust	isomap	svm_rbf	0.0161693
0.0897995	0.0257993	0.466012	0.0192027	0.46749	0.00239791	{'classifier__C': 10, 'classifier__gamma': 'scale'}	1	maxabs	truncatedsvd	svm_rbf	0.00147802
0.934461	0.0376019	0.356235	0.0235134	0.359972	0.0238015	{'classifier__C': 0.1, 'classifier__gamma': 'auto'}	3	robust	isomap	svm_sigmoid	0.00373696
0.849988	0.0336998	0.383816	0.0430612	0.384962	0.0438382	{'classifier__C': 1, 'classifier__gamma': 'scale'}	2	robust	isomap	svm_sigmoid	0.00114645
0.901346	0.0369964	0.315205	0.027143	0.313356	0.0144	{'classifier__C': 1, 'classifier__gamma': 'auto'}	5	robust	isomap	svm_sigmoid	-0.00184864
0.892863	0.0285988	0.355478	0.0481246	0.358999	0.0394314	{'classifier__C': 10, 'classifier__gamma': 'scale'}	4	robust	isomap	svm_sigmoid	0.00352081
0.678099	0.0183986	0.305777	0.0285058	0.304228	0.0138079	{'classifier__C': 10, 'classifier__gamma': 'auto'}	6	robust	isomap	svm_sigmoid	-0.00154925
0.881831	0.0326159	0.394595	0.016063	0.398955	0.0187257	{'classifier__C': 0.1, 'classifier__penalty': 'l1', 'classifier__solver': 'liblinear'}	6	robust	isomap	logistic_regression	0.00436036
0.0538996	0.00930078	0.466012	0.0118573	0.467416	0.00305105	{'classifier__C': 1, 'classifier__gamma': 'scale'}	1	maxabs	truncatedsvd	svm_linear	0.0014035
0.832992	0.0239586	0.396617	0.017004	0.39918	0.0191369	{'classifier__C': 1, 'classifier__penalty': 'l1', 'classifier__solver': 'liblinear'}	2	robust	isomap	logistic_regression	0.00256242
0.893858	0.0285959	0.395941	0.0162205	0.399703	0.0196169	{'classifier__C': 1, 'classifier__penalty': 'l2', 'classifier__solver': 'liblinear'}	4	robust	isomap	logistic_regression	0.00376204
0.886212	0.0264959	0.395941	0.016774	0.399105	0.0187641	{'classifier__C': 10, 'classifier__penalty': 'l1', 'classifier__solver': 'liblinear'}	4	robust	isomap	logistic_regression	0.00316324
0.689678	0.0129995	0.396617	0.017004	0.399254	0.0188966	{'classifier__C': 10, 'classifier__penalty': 'l2', 'classifier__solver': 'liblinear'}	2	robust	isomap	logistic_regression	0.00263715
0.547401	0.0148983	0.406013	0.0360925	0.413322	0.0363578	{}	1	robust	isomap	lda	0.00730934
0.580962	0.0161918	0.379666	0.10377	0.399711	0.0869065	{}	1	robust	isomap	gaussian_nb	0.0200447
0.879394	0.0280554	0.378451	0.00381329	0.379499	0.00350958	{'classifier__max_depth': None, 'classifier__min_samples_leaf': 5, 'classifier__min_samples_split': 2, 'classifier__n_estimators': 100}	65	robust	isomap	extra_trees	0.00104781
1024972129	0.0323022	0.378455	0.0052097	0.378002	0.00180904	{'classifier__max_depth': None, 'classifier__min_samples_leaf': 5, 'classifier__min_samples_split': 2, 'classifier__n_estimators': 200}	58	robust	isomap	extra_trees	-0.000453283
1154753351	0.0397002	0.378455	0.00424385	0.378751	0.00231234	{'classifier__max_depth': None, 'classifier__min_samples_leaf': 5, 'classifier__min_samples_split': 2, 'classifier__n_estimators': 300}	58	robust	isomap	extra_trees	0.000295164
1468323803	0.0553349	0.379127	0.00526144	0.378676	0.0030254	{'classifier__max_depth': None, 'classifier__min_samples_leaf': 5, 'classifier__min_samples_split': 2, 'classifier__n_estimators': 500}	50	robust	isomap	extra_trees	-0.000450604
0.911164	0.0264338	0.379127	0.0043072	0.378451	0.00219615	{'classifier__max_depth': None, 'classifier__min_samples_leaf': 5, 'classifier__min_samples_split': 10, 'classifier__n_estimators': 100}	50	robust	isomap	extra_trees	-0.000675658
1019265723	0.0316957	0.379798	0.0052272	0.37935	0.00338997	{'classifier__max_depth': None, 'classifier__min_samples_leaf': 5, 'classifier__min_samples_split': 10, 'classifier__n_estimators': 200}	43	robust	isomap	extra_trees	-0.000448148
1170914626	0.0401995	0.379127	0.00526144	0.378077	0.00226477	{'classifier__max_depth': None, 'classifier__min_samples_leaf': 5, 'classifier__min_samples_split': 10, 'classifier__n_estimators': 300}	50	robust	isomap	extra_trees	-0.00104941
1426338744	0.0575272	0.379798	0.00426531	0.379349	0.00275365	{'classifier__max_depth': None, 'classifier__min_samples_leaf': 5, 'classifier__min_samples_split': 10, 'classifier__n_estimators': 500}	43	robust	isomap	extra_trees	-0.000448428
0.899686	0.0262997	0.377775	0.00310118	0.378826	0.0045627	{'classifier__max_depth': None, 'classifier__min_samples_leaf': 5, 'classifier__min_samples_split': 20, 'classifier__n_estimators': 100}	71	robust	isomap	extra_trees	0.00105062
1032609272	0.0347011	0.379802	0.00554801	0.379424	0.00316795	{'classifier__max_depth': None, 'classifier__min_samples_leaf': 5, 'classifier__min_samples_split': 20, 'classifier__n_estimators': 200}	39	robust	isomap	extra_trees	-0.000378225
1152398801	0.0403007	0.37778	0.00361836	0.378526	0.00240575	{'classifier__max_depth': None, 'classifier__min_samples_leaf': 5, 'classifier__min_samples_split': 20, 'classifier__n_estimators': 300}	69	robust	isomap	extra_trees	0.000746121
1455399203	0.0545999	0.378455	0.0052097	0.377703	0.00172582	{'classifier__max_depth': None, 'classifier__min_samples_leaf': 5, 'classifier__min_samples_split': 20, 'classifier__n_estimators': 500}	58	robust	isomap	extra_trees	-0.000752517
0.905797	0.0242	0.376433	0.0020013	0.376431	0.000221608	{'classifier__max_depth': None, 'classifier__min_samples_leaf': 10, 'classifier__min_samples_split': 2, 'classifier__n_estimators': 100}	73	robust	isomap	extra_trees	-1.976e-06
1017944431	0.0329013	0.376433	0.0020013	0.376431	0.000221608	{'classifier__max_depth': None, 'classifier__min_samples_leaf': 10, 'classifier__min_samples_split': 2, 'classifier__n_estimators': 200}	73	robust	isomap	extra_trees	-1.976e-06
1147725511	0.0393996	0.376433	0.0020013	0.376431	0.000221608	{'classifier__max_depth': None, 'classifier__min_samples_leaf': 10, 'classifier__min_samples_split': 2, 'classifier__n_estimators': 300}	73	robust	isomap	extra_trees	-1.976e-06
1396164322	0.0575402	0.376433	0.0020013	0.376431	0.000221608	{'classifier__max_depth': None, 'classifier__min_samples_leaf': 10, 'classifier__min_samples_split': 2, 'classifier__n_estimators': 500}	73	robust	isomap	extra_trees	-1.976e-06
0.907866	0.0243983	0.376433	0.0020013	0.376431	0.000221608	{'classifier__max_depth': None, 'classifier__min_samples_leaf': 10, 'classifier__min_samples_split': 10, 'classifier__n_estimators': 100}	73	robust	isomap	extra_trees	-1.976e-06
1018402719	0.0308014	0.376433	0.0020013	0.376431	0.000221608	{'classifier__max_depth': None, 'classifier__min_samples_leaf': 10, 'classifier__min_samples_split': 10, 'classifier__n_estimators': 200}	73	robust	isomap	extra_trees	-1.976e-06
1142311287	0.0397174	0.376433	0.0020013	0.376431	0.000221608	{'classifier__max_depth': None, 'classifier__min_samples_leaf': 10, 'classifier__min_samples_split': 10, 'classifier__n_estimators': 300}	73	robust	isomap	extra_trees	-1.976e-06
1431489015	0.0536006	0.376433	0.0020013	0.376431	0.000221608	{'classifier__max_depth': None, 'classifier__min_samples_leaf': 10, 'classifier__min_samples_split': 10, 'classifier__n_estimators': 500}	73	robust	isomap	extra_trees	-1.976e-06
0.898264	0.0254995	0.376433	0.0020013	0.376431	0.000221608	{'classifier__max_depth': None, 'classifier__min_samples_leaf': 10, 'classifier__min_samples_split': 20, 'classifier__n_estimators': 100}	73	robust	isomap	extra_trees	-1.976e-06
0.996313	0.0294009	0.376433	0.0020013	0.376431	0.000221608	{'classifier__max_depth': None, 'classifier__min_samples_leaf': 10, 'classifier__min_samples_split': 20, 'classifier__n_estimators': 200}	73	robust	isomap	extra_trees	-1.976e-06
1166679597	0.0399406	0.376433	0.0020013	0.376431	0.000221608	{'classifier__max_depth': None, 'classifier__min_samples_leaf': 10, 'classifier__min_samples_split': 20, 'classifier__n_estimators': 300}	73	robust	isomap	extra_trees	-1.976e-06
1449751115	0.0512006	0.376433	0.0020013	0.376431	0.000221608	{'classifier__max_depth': None, 'classifier__min_samples_leaf': 10, 'classifier__min_samples_split': 20, 'classifier__n_estimators': 500}	73	robust	isomap	extra_trees	-1.976e-06
0.8865	0.0260997	0.379127	0.00526144	0.378452	0.00304691	{'classifier__max_depth': 10, 'classifier__min_samples_leaf': 5, 'classifier__min_samples_split': 2, 'classifier__n_estimators': 100}	50	robust	isomap	extra_trees	-0.000675099
1026198506	0.0317995	0.378455	0.00424385	0.378077	0.00155749	{'classifier__max_depth': 10, 'classifier__min_samples_leaf': 5, 'classifier__min_samples_split': 2, 'classifier__n_estimators': 200}	58	robust	isomap	extra_trees	-0.000378433
1169998193	0.039499	0.378455	0.0052097	0.378152	0.00278287	{'classifier__max_depth': 10, 'classifier__min_samples_leaf': 5, 'classifier__min_samples_split': 2, 'classifier__n_estimators': 300}	58	robust	isomap	extra_trees	-0.000303415
1412262607	0.0528516	0.378455	0.00424385	0.378526	0.00215042	{'classifier__max_depth': 10, 'classifier__min_samples_leaf': 5, 'classifier__min_samples_split': 2, 'classifier__n_estimators': 500}	58	robust	isomap	extra_trees	7.0389e-05
0.911041	0.0266011	0.380473	0.00543271	0.379724	0.00385853	{'classifier__max_depth': 10, 'classifier__min_samples_leaf': 5, 'classifier__min_samples_split': 10, 'classifier__n_estimators': 100}	37	robust	isomap	extra_trees	-0.000749851
1010317159	0.0321011	0.379798	0.0052272	0.378901	0.00299407	{'classifier__max_depth': 10, 'classifier__min_samples_leaf': 5, 'classifier__min_samples_split': 10, 'classifier__n_estimators': 200}	43	robust	isomap	extra_trees	-0.000897194
1167675161	0.0405996	0.380473	0.00543271	0.37905	0.00260862	{'classifier__max_depth': 10, 'classifier__min_samples_leaf': 5, 'classifier__min_samples_split': 10, 'classifier__n_estimators': 300}	37	robust	isomap	extra_trees	-0.00142356
1441198635	0.0511992	0.379802	0.00554801	0.378601	0.0024721	{'classifier__max_depth': 10, 'classifier__min_samples_leaf': 5, 'classifier__min_samples_split': 10, 'classifier__n_estimators': 500}	39	robust	isomap	extra_trees	-0.00120135
0.893997	0.0262	0.378451	0.00381329	0.378825	0.00283597	{'classifier__max_depth': 10, 'classifier__min_samples_leaf': 5, 'classifier__min_samples_split': 20, 'classifier__n_estimators': 100}	66	robust	isomap	extra_trees	0.000374493
1007099557	0.0294998	0.379131	0.00558083	0.37875	0.00252474	{'classifier__max_depth': 10, 'classifier__min_samples_leaf': 5, 'classifier__min_samples_split': 20, 'classifier__n_estimators': 200}	47	robust	isomap	extra_trees	-0.000381072
117420392	0.0399968	0.378455	0.0052097	0.378077	0.0019454	{'classifier__max_depth': 10, 'classifier__min_samples_leaf': 5, 'classifier__min_samples_split': 20, 'classifier__n_estimators': 300}	58	robust	isomap	extra_trees	-0.000378265
1435899901	0.0533171	0.379802	0.00554801	0.378077	0.00166985	{'classifier__max_depth': 10, 'classifier__min_samples_leaf': 5, 'classifier__min_samples_split': 20, 'classifier__n_estimators': 500}	39	robust	isomap	extra_trees	-0.00172536
0.892755	0.0268965	0.376433	0.0020013	0.376431	0.000221608	{'classifier__max_depth': 10, 'classifier__min_samples_leaf': 10, 'classifier__min_samples_split': 2, 'classifier__n_estimators': 100}	73	robust	isomap	extra_trees	-1.976e-06
1018361974	0.0340019	0.376433	0.0020013	0.376431	0.000221608	{'classifier__max_depth': 10, 'classifier__min_samples_leaf': 10, 'classifier__min_samples_split': 2, 'classifier__n_estimators': 200}	73	robust	isomap	extra_trees	-1.976e-06
1175818467	0.038118	0.376433	0.0020013	0.376431	0.000221608	{'classifier__max_depth': 10, 'classifier__min_samples_leaf': 10, 'classifier__min_samples_split': 2, 'classifier__n_estimators': 300}	73	robust	isomap	extra_trees	-1.976e-06
1454277253	0.050803	0.376433	0.0020013	0.376431	0.000221608	{'classifier__max_depth': 10, 'classifier__min_samples_leaf': 10, 'classifier__min_samples_split': 2, 'classifier__n_estimators': 500}	73	robust	isomap	extra_trees	-1.976e-06
0.872783	0.0253991	0.376433	0.0020013	0.376431	0.000221608	{'classifier__max_depth': 10, 'classifier__min_samples_leaf': 10, 'classifier__min_samples_split': 10, 'classifier__n_estimators': 100}	73	robust	isomap	extra_trees	-1.976e-06
1019611526	0.0311003	0.376433	0.0020013	0.376431	0.000221608	{'classifier__max_depth': 10, 'classifier__min_samples_leaf': 10, 'classifier__min_samples_split': 10, 'classifier__n_estimators': 200}	73	robust	isomap	extra_trees	-1.976e-06
1149842572	0.0415997	0.376433	0.0020013	0.376431	0.000221608	{'classifier__max_depth': 10, 'classifier__min_samples_leaf': 10, 'classifier__min_samples_split': 10, 'classifier__n_estimators': 300}	73	robust	isomap	extra_trees	-1.976e-06
1459886694	0.0528996	0.376433	0.0020013	0.376431	0.000221608	{'classifier__max_depth': 10, 'classifier__min_samples_leaf': 10, 'classifier__min_samples_split': 10, 'classifier__n_estimators': 500}	73	robust	isomap	extra_trees	-1.976e-06
0.893524	0.0244017	0.376433	0.0020013	0.376431	0.000221608	{'classifier__max_depth': 10, 'classifier__min_samples_leaf': 10, 'classifier__min_samples_split': 20, 'classifier__n_estimators': 100}	73	robust	isomap	extra_trees	-1.976e-06
1030186105	0.0320034	0.376433	0.0020013	0.376431	0.000221608	{'classifier__max_depth': 10, 'classifier__min_samples_leaf': 10, 'classifier__min_samples_split': 20, 'classifier__n_estimators': 200}	73	robust	isomap	extra_trees	-1.976e-06
1150952697	0.0406028	0.376433	0.0020013	0.376431	0.000221608	{'classifier__max_depth': 10, 'classifier__min_samples_leaf': 10, 'classifier__min_samples_split': 20, 'classifier__n_estimators': 300}	73	robust	isomap	extra_trees	-1.976e-06
140489645	0.0484007	0.376433	0.0020013	0.376431	0.000221608	{'classifier__max_depth': 10, 'classifier__min_samples_leaf': 10, 'classifier__min_samples_split': 20, 'classifier__n_estimators': 500}	73	robust	isomap	extra_trees	-1.976e-06
0.904601	0.0268003	0.378446	0.00332747	0.37935	0.00320966	{'classifier__max_depth': 20, 'classifier__min_samples_leaf': 5, 'classifier__min_samples_split': 2, 'classifier__n_estimators': 100}	68	robust	isomap	extra_trees	0.00090326
1050344515	0.0327	0.37778	0.00361836	0.377778	0.00183481	{'classifier__max_depth': 20, 'classifier__min_samples_leaf': 5, 'classifier__min_samples_split': 2, 'classifier__n_estimators': 200}	69	robust	isomap	extra_trees	-2.046e-06
1160375929	0.0419023	0.378451	0.00381329	0.377703	0.00177015	{'classifier__max_depth': 20, 'classifier__min_samples_leaf': 5, 'classifier__min_samples_split': 2, 'classifier__n_estimators': 300}	66	robust	isomap	extra_trees	-0.000747926
1429952526	0.054815	0.379131	0.00558083	0.37905	0.00260862	{'classifier__max_depth': 20, 'classifier__min_samples_leaf': 5, 'classifier__min_samples_split': 2, 'classifier__n_estimators': 500}	47	robust	isomap	extra_trees	-8.1279e-05
0.909284	0.0253011	0.379127	0.0043072	0.37905	0.00309939	{'classifier__max_depth': 20, 'classifier__min_samples_leaf': 5, 'classifier__min_samples_split': 10, 'classifier__n_estimators': 100}	50	robust	isomap	extra_trees	-7.6744e-05
1039174986	0.0298035	0.379131	0.00558083	0.377703	0.00141359	{'classifier__max_depth': 20, 'classifier__min_samples_leaf': 5, 'classifier__min_samples_split': 10, 'classifier__n_estimators': 200}	47	robust	isomap	extra_trees	-0.00142831
116718204	0.0404005	0.379127	0.0043072	0.379873	0.00403674	{'classifier__max_depth': 20, 'classifier__min_samples_leaf': 5, 'classifier__min_samples_split': 10, 'classifier__n_estimators': 300}	50	robust	isomap	extra_trees	0.000746721
1454596186	0.0549222	0.379127	0.0043072	0.378676	0.00247796	{'classifier__max_depth': 20, 'classifier__min_samples_leaf': 5, 'classifier__min_samples_split': 10, 'classifier__n_estimators': 500}	50	robust	isomap	extra_trees	-0.000450884
0.897884	0.026199	0.377775	0.00310118	0.378302	0.00196961	{'classifier__max_depth': 20, 'classifier__min_samples_leaf': 5, 'classifier__min_samples_split': 20, 'classifier__n_estimators': 100}	71	robust	isomap	extra_trees	0.000526665
1019205117	0.0314213	0.379798	0.0052272	0.378526	0.00206169	{'classifier__max_depth': 20, 'classifier__min_samples_leaf': 5, 'classifier__min_samples_split': 20, 'classifier__n_estimators': 200}	43	robust	isomap	extra_trees	-0.0012715
1170789838	0.0408005	0.379802	0.00554801	0.37905	0.00297133	{'classifier__max_depth': 20, 'classifier__min_samples_leaf': 5, 'classifier__min_samples_split': 20, 'classifier__n_estimators': 300}	39	robust	isomap	extra_trees	-0.0007527
1433775043	0.0546967	0.379127	0.0043072	0.378152	0.00171419	{'classifier__max_depth': 20, 'classifier__min_samples_leaf': 5, 'classifier__min_samples_split': 20, 'classifier__n_estimators': 500}	50	robust	isomap	extra_trees	-0.000974836
0.891303	0.0250989	0.376433	0.0020013	0.376431	0.000221608	{'classifier__max_depth': 20, 'classifier__min_samples_leaf': 10, 'classifier__min_samples_split': 2, 'classifier__n_estimators': 100}	73	robust	isomap	extra_trees	-1.976e-06
1030300736	0.0319977	0.376433	0.0020013	0.376431	0.000221608	{'classifier__max_depth': 20, 'classifier__min_samples_leaf': 10, 'classifier__min_samples_split': 2, 'classifier__n_estimators': 200}	73	robust	isomap	extra_trees	-1.976e-06
1186300707	0.040006	0.376433	0.0020013	0.376431	0.000221608	{'classifier__max_depth': 20, 'classifier__min_samples_leaf': 10, 'classifier__min_samples_split': 2, 'classifier__n_estimators': 300}	73	robust	isomap	extra_trees	-1.976e-06
140689733	0.0546	0.376433	0.0020013	0.376431	0.000221608	{'classifier__max_depth': 20, 'classifier__min_samples_leaf': 10, 'classifier__min_samples_split': 2, 'classifier__n_estimators': 500}	73	robust	isomap	extra_trees	-1.976e-06
0.913899	0.0257001	0.376433	0.0020013	0.376431	0.000221608	{'classifier__max_depth': 20, 'classifier__min_samples_leaf': 10, 'classifier__min_samples_split': 10, 'classifier__n_estimators': 100}	73	robust	isomap	extra_trees	-1.976e-06
1013200164	0.0312998	0.376433	0.0020013	0.376431	0.000221608	{'classifier__max_depth': 20, 'classifier__min_samples_leaf': 10, 'classifier__min_samples_split': 10, 'classifier__n_estimators': 200}	73	robust	isomap	extra_trees	-1.976e-06
1141498995	0.0374003	0.376433	0.0020013	0.376431	0.000221608	{'classifier__max_depth': 20, 'classifier__min_samples_leaf': 10, 'classifier__min_samples_split': 10, 'classifier__n_estimators': 300}	73	robust	isomap	extra_trees	-1.976e-06
1454918122	0.0560983	0.376433	0.0020013	0.376431	0.000221608	{'classifier__max_depth': 20, 'classifier__min_samples_leaf': 10, 'classifier__min_samples_split': 10, 'classifier__n_estimators': 500}	73	robust	isomap	extra_trees	-1.976e-06
0.909021	0.0254994	0.376433	0.0020013	0.376431	0.000221608	{'classifier__max_depth': 20, 'classifier__min_samples_leaf': 10, 'classifier__min_samples_split': 20, 'classifier__n_estimators': 100}	73	robust	isomap	extra_trees	-1.976e-06
1020999384	0.0309975	0.376433	0.0020013	0.376431	0.000221608	{'classifier__max_depth': 20, 'classifier__min_samples_leaf': 10, 'classifier__min_samples_split': 20, 'classifier__n_estimators': 200}	73	robust	isomap	extra_trees	-1.976e-06
1170789313	0.0359003	0.376433	0.0020013	0.376431	0.000221608	{'classifier__max_depth': 20, 'classifier__min_samples_leaf': 10, 'classifier__min_samples_split': 20, 'classifier__n_estimators': 300}	73	robust	isomap	extra_trees	-1.976e-06
1252707839	0.0334001	0.376433	0.0020013	0.376431	0.000221608	{'classifier__max_depth': 20, 'classifier__min_samples_leaf': 10, 'classifier__min_samples_split': 20, 'classifier__n_estimators': 500}	73	robust	isomap	extra_trees	-1.976e-06
2476054764	0.0181151	0.441738	0.0591616	0.458889	0.0556743	{'classifier__alpha': 0.0001, 'classifier__hidden_layer_sizes': (50,)}	8	robust	isomap	mlp	0.0171512
2677502489	0.0196169	0.439688	0.0551552	0.459338	0.0565068	{'classifier__alpha': 0.0001, 'classifier__hidden_layer_sizes': (100,)}	9	robust	isomap	mlp	0.0196499
2971069026	0.0187018	0.450458	0.0439495	0.479168	0.0510651	{'classifier__alpha': 0.0001, 'classifier__hidden_layer_sizes': (50, 50)}	2	robust	isomap	mlp	0.0287105
2579382324	0.0187999	0.44712	0.04471	0.45919	0.0537925	{'classifier__alpha': 0.001, 'classifier__hidden_layer_sizes': (50,)}	6	robust	isomap	mlp	0.0120694
2537894273	0.019698	0.445774	0.0493187	0.460087	0.0531875	{'classifier__alpha': 0.001, 'classifier__hidden_layer_sizes': (100,)}	7	robust	isomap	mlp	0.0143135
237205596	0.0193999	0.447751	0.0463583	0.468693	0.0498251	{'classifier__alpha': 0.001, 'classifier__hidden_layer_sizes': (50, 50)}	5	robust	isomap	mlp	0.0209424
2524237585	0.0177981	0.448431	0.051918	0.458367	0.0537375	{'classifier__alpha': 0.01, 'classifier__hidden_layer_sizes': (50,)}	4	robust	isomap	mlp	0.00993568
2353890944	0.0152996	0.449125	0.0452558	0.463529	0.0502056	{'classifier__alpha': 0.01, 'classifier__hidden_layer_sizes': (100,)}	3	robust	isomap	mlp	0.0144041
211606369	0.0125008	0.451827	0.0338017	0.472507	0.0520119	{'classifier__alpha': 0.01, 'classifier__hidden_layer_sizes': (50, 50)}	1	robust	isomap	mlp	0.0206798
0.2619	0.0260011	0.376433	0.0020013	0.376431	0.000221608	{'classifier__C': 0.1, 'classifier__gamma': 'scale'}	3	robust	lle	svm_linear	-1.976e-06
0.270598	0.0270003	0.376433	0.0020013	0.376431	0.000221608	{'classifier__C': 0.1, 'classifier__gamma': 'auto'}	3	robust	lle	svm_linear	-1.976e-06
0.2704	0.0278996	0.376433	0.0020013	0.376431	0.000221608	{'classifier__C': 1, 'classifier__gamma': 'scale'}	3	robust	lle	svm_linear	-1.976e-06
0.286899	0.0273001	0.376433	0.0020013	0.376431	0.000221608	{'classifier__C': 1, 'classifier__gamma': 'auto'}	3	robust	lle	svm_linear	-1.976e-06
0.0542044	0.0102149	0.466012	0.0118573	0.467416	0.00305105	{'classifier__C': 1, 'classifier__gamma': 'auto'}	1	maxabs	truncatedsvd	svm_linear	0.0014035
0.155832	0.0360002	0.463291	0.0239835	0.465619	0.00355894	{'classifier__C': 10, 'classifier__penalty': 'l1', 'classifier__solver': 'liblinear'}	1	quantile-normal	pca	logistic_regression	0.00232777
0.30023	0.0482011	0.408076	0.0331107	0.416013	0.0360747	{'classifier__C': 0.1, 'classifier__gamma': 'scale'}	3	robust	lle	svm_rbf	0.00793645
0.31213	0.0436013	0.376433	0.0020013	0.376431	0.000221608	{'classifier__C': 0.1, 'classifier__gamma': 'auto'}	5	robust	lle	svm_rbf	-1.976e-06
0.316853	0.0455677	0.428923	0.0458092	0.438684	0.0478524	{'classifier__C': 1, 'classifier__gamma': 'scale'}	2	robust	lle	svm_rbf	0.00976151
0.317318	0.0404141	0.376433	0.0020013	0.376431	0.000221608	{'classifier__C': 1, 'classifier__gamma': 'auto'}	5	robust	lle	svm_rbf	-1.976e-06
0.344407	0.0417006	0.442382	0.0478679	0.452304	0.0538333	{'classifier__C': 10, 'classifier__gamma': 'scale'}	1	robust	lle	svm_rbf	0.00992248
0.2452	0.0272017	0.392577	0.0142759	0.395961	0.0169988	{'classifier__C': 10, 'classifier__gamma': 'auto'}	4	robust	lle	svm_rbf	0.00338486
0.304169	0.0277997	0.39932	0.0249327	0.401348	0.0244083	{'classifier__C': 0.1, 'classifier__gamma': 'scale'}	3	robust	lle	svm_sigmoid	0.00202808
0.310798	0.0284004	0.376433	0.0020013	0.376431	0.000221608	{'classifier__C': 0.1, 'classifier__gamma': 'auto'}	5	robust	lle	svm_sigmoid	-1.976e-06
0.317899	0.0293011	0.407419	0.0379837	0.408754	0.030853	{'classifier__C': 1, 'classifier__gamma': 'scale'}	1	robust	lle	svm_sigmoid	0.00133535
0.332101	0.0301009	0.376433	0.0020013	0.376431	0.000221608	{'classifier__C': 1, 'classifier__gamma': 'auto'}	5	robust	lle	svm_sigmoid	-1.976e-06
0.296732	0.0287002	0.399342	0.043076	0.403065	0.0326301	{'classifier__C': 10, 'classifier__gamma': 'scale'}	2	robust	lle	svm_sigmoid	0.00372248
0.231099	0.0199011	0.378446	0.00448115	0.381744	0.00599584	{'classifier__C': 10, 'classifier__gamma': 'auto'}	4	robust	lle	svm_sigmoid	0.00329791
0.220267	0.0228982	0.376433	0.0020013	0.376431	0.000221608	{'classifier__C': 0.1, 'classifier__penalty': 'l1', 'classifier__solver': 'liblinear'}	4	robust	lle	logistic_regression	-1.976e-06
0.233864	0.0223984	0.376433	0.0020013	0.376431	0.000221608	{'classifier__C': 0.1, 'classifier__penalty': 'l2', 'classifier__solver': 'liblinear'}	4	robust	lle	logistic_regression	-1.976e-06
0.24436	0.0238004	0.385852	0.0105353	0.393567	0.0142635	{'classifier__C': 1, 'classifier__penalty': 'l1', 'classifier__solver': 'liblinear'}	2	robust	lle	logistic_regression	0.00771528
0.249057	0.022601	0.376433	0.0020013	0.376431	0.000221608	{'classifier__C': 1, 'classifier__penalty': 'l2', 'classifier__solver': 'liblinear'}	4	robust	lle	logistic_regression	-1.976e-06
0.253326	0.0226005	0.403365	0.0257493	0.412872	0.0307207	{'classifier__C': 10, 'classifier__penalty': 'l1', 'classifier__solver': 'liblinear'}	1	robust	lle	logistic_regression	0.00950673
0.201399	0.0149999	0.378446	0.00448115	0.383091	0.00712918	{'classifier__C': 10, 'classifier__penalty': 'l2', 'classifier__solver': 'liblinear'}	3	robust	lle	logistic_regression	0.00464494
0.133099	0.0133009	0.402675	0.0359199	0.409729	0.0299468	{}	1	robust	lle	lda	0.00705331
0.131948	0.0142002	0.253655	0.133753	0.262123	0.13506	{}	1	robust	lle	gaussian_nb	0.00846767
0.377866	0.0314001	0.399932	0.0411934	0.414672	0.0429791	{'classifier__max_depth': None, 'classifier__min_samples_leaf': 5, 'classifier__min_samples_split': 2, 'classifier__n_estimators': 100}	42	robust	lle	extra_trees	0.0147402
0.534193	0.0396003	0.400612	0.0321798	0.417067	0.0413374	{'classifier__max_depth': None, 'classifier__min_samples_leaf': 5, 'classifier__min_samples_split': 2, 'classifier__n_estimators': 200}	37	robust	lle	extra_trees	0.0164551
0.683559	0.0472	0.397937	0.0287375	0.415868	0.0406603	{'classifier__max_depth': None, 'classifier__min_samples_leaf': 5, 'classifier__min_samples_split': 2, 'classifier__n_estimators': 300}	60	robust	lle	extra_trees	0.017931
1019998932	0.0708503	0.398608	0.0284472	0.417516	0.0438418	{'classifier__max_depth': None, 'classifier__min_samples_leaf': 5, 'classifier__min_samples_split': 2, 'classifier__n_estimators': 500}	50	robust	lle	extra_trees	0.018908
0.388716	0.0327003	0.401959	0.0340593	0.41819	0.0464506	{'classifier__max_depth': None, 'classifier__min_samples_leaf': 5, 'classifier__min_samples_split': 10, 'classifier__n_estimators': 100}	33	robust	lle	extra_trees	0.0162315
0.560634	0.0402001	0.39591	0.0288539	0.412802	0.0413997	{'classifier__max_depth': None, 'classifier__min_samples_leaf': 5, 'classifier__min_samples_split': 10, 'classifier__n_estimators': 200}	68	robust	lle	extra_trees	0.0168923
0.699399	0.0483001	0.398603	0.0308256	0.416991	0.0411955	{'classifier__max_depth': None, 'classifier__min_samples_leaf': 5, 'classifier__min_samples_split': 10, 'classifier__n_estimators': 300}	54	robust	lle	extra_trees	0.0183878
1009704685	0.067463	0.398599	0.0309124	0.416094	0.0418188	{'classifier__max_depth': None, 'classifier__min_samples_leaf': 5, 'classifier__min_samples_split': 10, 'classifier__n_estimators': 500}	57	robust	lle	extra_trees	0.0174949
0.385905	0.0312001	0.39927	0.03276	0.416842	0.0401791	{'classifier__max_depth': None, 'classifier__min_samples_leaf': 5, 'classifier__min_samples_split': 20, 'classifier__n_estimators': 100}	48	robust	lle	extra_trees	0.0175717
0.541058	0.0395991	0.401964	0.0361567	0.416318	0.0396742	{'classifier__max_depth': None, 'classifier__min_samples_leaf': 5, 'classifier__min_samples_split': 20, 'classifier__n_estimators': 200}	32	robust	lle	extra_trees	0.0143543
0.710971	0.0507003	0.398603	0.0329446	0.414446	0.0398445	{'classifier__max_depth': None, 'classifier__min_samples_leaf': 5, 'classifier__min_samples_split': 20, 'classifier__n_estimators': 300}	54	robust	lle	extra_trees	0.0158432
101734345	0.0644999	0.399279	0.03434	0.413924	0.0400133	{'classifier__max_depth': None, 'classifier__min_samples_leaf': 5, 'classifier__min_samples_split': 20, 'classifier__n_estimators': 500}	43	robust	lle	extra_trees	0.0146446
0.385519	0.0332174	0.388509	0.0282066	0.394467	0.0207259	{'classifier__max_depth': None, 'classifier__min_samples_leaf': 10, 'classifier__min_samples_split': 2, 'classifier__n_estimators': 100}	103	robust	lle	extra_trees	0.00595775
0.529217	0.0418002	0.387176	0.0235578	0.395141	0.0232439	{'classifier__max_depth': None, 'classifier__min_samples_leaf': 10, 'classifier__min_samples_split': 2, 'classifier__n_estimators': 200}	104	robust	lle	extra_trees	0.00796518
0.686069	0.0463998	0.391207	0.0268504	0.398583	0.0240833	{'classifier__max_depth': None, 'classifier__min_samples_leaf': 10, 'classifier__min_samples_split': 2, 'classifier__n_estimators': 300}	78	robust	lle	extra_trees	0.00737557
1000067258	0.0644007	0.392558	0.0289517	0.398134	0.024508	{'classifier__max_depth': None, 'classifier__min_samples_leaf': 10, 'classifier__min_samples_split': 2, 'classifier__n_estimators': 500}	73	robust	lle	extra_trees	0.00557545
0.386251	0.0317003	0.389189	0.0294977	0.393943	0.0211986	{'classifier__max_depth': None, 'classifier__min_samples_leaf': 10, 'classifier__min_samples_split': 10, 'classifier__n_estimators': 100}	94	robust	lle	extra_trees	0.00475415
0.5294	0.0415003	0.38986	0.0292617	0.394392	0.0225092	{'classifier__max_depth': None, 'classifier__min_samples_leaf': 10, 'classifier__min_samples_split': 10, 'classifier__n_estimators': 200}	90	robust	lle	extra_trees	0.00453178
0.6843	0.0478999	0.391887	0.0270105	0.39746	0.0241816	{'classifier__max_depth': None, 'classifier__min_samples_leaf': 10, 'classifier__min_samples_split': 10, 'classifier__n_estimators': 300}	75	robust	lle	extra_trees	0.00557288
0.9957	0.0631997	0.389189	0.0276046	0.396563	0.0243615	{'classifier__max_depth': None, 'classifier__min_samples_leaf': 10, 'classifier__min_samples_split': 10, 'classifier__n_estimators': 500}	94	robust	lle	extra_trees	0.00737385
0.3791	0.0302999	0.391207	0.0268504	0.399331	0.0242947	{'classifier__max_depth': None, 'classifier__min_samples_leaf': 10, 'classifier__min_samples_split': 20, 'classifier__n_estimators': 100}	78	robust	lle	extra_trees	0.00812357
0.541558	0.0415192	0.39055	0.0258161	0.398581	0.0218283	{'classifier__max_depth': None, 'classifier__min_samples_leaf': 10, 'classifier__min_samples_split': 20, 'classifier__n_estimators': 200}	81	robust	lle	extra_trees	0.00803171
0.69556	0.0500003	0.392563	0.0253716	0.399106	0.0240875	{'classifier__max_depth': None, 'classifier__min_samples_leaf': 10, 'classifier__min_samples_split': 20, 'classifier__n_estimators': 300}	71	robust	lle	extra_trees	0.00654268
100087316	0.0659452	0.389869	0.0269765	0.398283	0.0211573	{'classifier__max_depth': None, 'classifier__min_samples_leaf': 10, 'classifier__min_samples_split': 20, 'classifier__n_estimators': 500}	88	robust	lle	extra_trees	0.00841324
0.374129	0.0312327	0.400608	0.0392419	0.418562	0.0398626	{'classifier__max_depth': 10, 'classifier__min_samples_leaf': 5, 'classifier__min_samples_split': 2, 'classifier__n_estimators': 100}	39	robust	lle	extra_trees	0.0179545
0.532013	0.0393992	0.400608	0.0354645	0.417216	0.0400344	{'classifier__max_depth': 10, 'classifier__min_samples_leaf': 5, 'classifier__min_samples_split': 2, 'classifier__n_estimators': 200}	38	robust	lle	extra_trees	0.016608
0.687722	0.0480152	0.396576	0.0312711	0.412578	0.040421	{'classifier__max_depth': 10, 'classifier__min_samples_leaf': 5, 'classifier__min_samples_split': 2, 'classifier__n_estimators': 300}	67	robust	lle	extra_trees	0.0160017
1009253263	0.0670003	0.398608	0.0323028	0.41355	0.0396935	{'classifier__max_depth': 10, 'classifier__min_samples_leaf': 5, 'classifier__min_samples_split': 2, 'classifier__n_estimators': 500}	50	robust	lle	extra_trees	0.0149417
0.386661	0.0372001	0.401283	0.0375729	0.414522	0.040562	{'classifier__max_depth': 10, 'classifier__min_samples_leaf': 5, 'classifier__min_samples_split': 10, 'classifier__n_estimators': 100}	36	robust	lle	extra_trees	0.013239
0.5349	0.0415173	0.397928	0.028612	0.416467	0.0394766	{'classifier__max_depth': 10, 'classifier__min_samples_leaf': 5, 'classifier__min_samples_split': 10, 'classifier__n_estimators': 200}	61	robust	lle	extra_trees	0.0185395
0.688365	0.0471	0.399274	0.0303847	0.41527	0.039534	{'classifier__max_depth': 10, 'classifier__min_samples_leaf': 5, 'classifier__min_samples_split': 10, 'classifier__n_estimators': 300}	46	robust	lle	extra_trees	0.0159957
1001365805	0.0674004	0.397266	0.0306698	0.413174	0.0391012	{'classifier__max_depth': 10, 'classifier__min_samples_leaf': 5, 'classifier__min_samples_split': 10, 'classifier__n_estimators': 500}	63	robust	lle	extra_trees	0.0159088
0.378917	0.0312005	0.397266	0.0285397	0.411005	0.0381602	{'classifier__max_depth': 10, 'classifier__min_samples_leaf': 5, 'classifier__min_samples_split': 20, 'classifier__n_estimators': 100}	63	robust	lle	extra_trees	0.0137391
0.544066	0.0410995	0.39995	0.0323048	0.413325	0.0397293	{'classifier__max_depth': 10, 'classifier__min_samples_leaf': 5, 'classifier__min_samples_split': 20, 'classifier__n_estimators': 200}	40	robust	lle	extra_trees	0.0133754
0.682165	0.0487996	0.398603	0.03267	0.412503	0.0390165	{'classifier__max_depth': 10, 'classifier__min_samples_leaf': 5, 'classifier__min_samples_split': 20, 'classifier__n_estimators': 300}	54	robust	lle	extra_trees	0.0138995
0.99189	0.0673007	0.399274	0.032678	0.413774	0.0393291	{'classifier__max_depth': 10, 'classifier__min_samples_leaf': 5, 'classifier__min_samples_split': 20, 'classifier__n_estimators': 500}	47	robust	lle	extra_trees	0.0144995
0.379622	0.0322166	0.389189	0.0233625	0.395739	0.0206598	{'classifier__max_depth': 10, 'classifier__min_samples_leaf': 10, 'classifier__min_samples_split': 2, 'classifier__n_estimators': 100}	94	robust	lle	extra_trees	0.00654949
0.537734	0.0403182	0.390545	0.026934	0.39454	0.0181844	{'classifier__max_depth': 10, 'classifier__min_samples_leaf': 10, 'classifier__min_samples_split': 2, 'classifier__n_estimators': 200}	82	robust	lle	extra_trees	0.00399505
0.680773	0.0481001	0.392563	0.0272546	0.398583	0.0217765	{'classifier__max_depth': 10, 'classifier__min_samples_leaf': 10, 'classifier__min_samples_split': 2, 'classifier__n_estimators': 300}	71	robust	lle	extra_trees	0.00601951
0.986074	0.0654319	0.389865	0.0250078	0.396712	0.024081	{'classifier__max_depth': 10, 'classifier__min_samples_leaf': 10, 'classifier__min_samples_split': 2, 'classifier__n_estimators': 500}	89	robust	lle	extra_trees	0.0068471
0.380595	0.0325006	0.38986	0.0252991	0.396413	0.0228805	{'classifier__max_depth': 10, 'classifier__min_samples_leaf': 10, 'classifier__min_samples_split': 10, 'classifier__n_estimators': 100}	90	robust	lle	extra_trees	0.00655223
0.519879	0.0396	0.392549	0.0327759	0.399331	0.0283889	{'classifier__max_depth': 10, 'classifier__min_samples_leaf': 10, 'classifier__min_samples_split': 10, 'classifier__n_estimators': 200}	74	robust	lle	extra_trees	0.00678185
0.6936	0.0482001	0.391212	0.0269173	0.397086	0.0227479	{'classifier__max_depth': 10, 'classifier__min_samples_leaf': 10, 'classifier__min_samples_split': 10, 'classifier__n_estimators': 300}	77	robust	lle	extra_trees	0.00587403
0.979201	0.0639993	0.389194	0.022848	0.397759	0.0249906	{'classifier__max_depth': 10, 'classifier__min_samples_leaf': 10, 'classifier__min_samples_split': 10, 'classifier__n_estimators': 500}	93	robust	lle	extra_trees	0.00856569
0.3758	0.0325001	0.391878	0.0288182	0.397161	0.0232452	{'classifier__max_depth': 10, 'classifier__min_samples_leaf': 10, 'classifier__min_samples_split': 20, 'classifier__n_estimators': 100}	76	robust	lle	extra_trees	0.00528255
0.532899	0.0410007	0.394576	0.0280004	0.398582	0.0210755	{'classifier__max_depth': 10, 'classifier__min_samples_leaf': 10, 'classifier__min_samples_split': 20, 'classifier__n_estimators': 200}	70	robust	lle	extra_trees	0.00400598
0.681099	0.0478004	0.390541	0.0249621	0.395813	0.0203473	{'classifier__max_depth': 10, 'classifier__min_samples_leaf': 10, 'classifier__min_samples_split': 20, 'classifier__n_estimators': 300}	84	robust	lle	extra_trees	0.00527271
0.9798	0.0615006	0.389189	0.0252169	0.397461	0.0260735	{'classifier__max_depth': 10, 'classifier__min_samples_leaf': 10, 'classifier__min_samples_split': 20, 'classifier__n_estimators': 500}	94	robust	lle	extra_trees	0.00827184
0.3741	0.0322998	0.40195	0.048955	0.415569	0.0422944	{'classifier__max_depth': 20, 'classifier__min_samples_leaf': 5, 'classifier__min_samples_split': 2, 'classifier__n_estimators': 100}	34	robust	lle	extra_trees	0.0136186
0.527668	0.0399996	0.40195	0.0423382	0.415721	0.0436158	{'classifier__max_depth': 20, 'classifier__min_samples_leaf': 5, 'classifier__min_samples_split': 2, 'classifier__n_estimators': 200}	34	robust	lle	extra_trees	0.0137708
0.690605	0.0487181	0.397252	0.0296069	0.416318	0.0414941	{'classifier__max_depth': 20, 'classifier__min_samples_leaf': 5, 'classifier__min_samples_split': 2, 'classifier__n_estimators': 300}	65	robust	lle	extra_trees	0.0190664
0.999584	0.0656987	0.403315	0.0342129	0.417067	0.0425679	{'classifier__max_depth': 20, 'classifier__min_samples_leaf': 5, 'classifier__min_samples_split': 2, 'classifier__n_estimators': 500}	29	robust	lle	extra_trees	0.0137519
0.385554	0.0318007	0.399279	0.0307431	0.419234	0.0414296	{'classifier__max_depth': 20, 'classifier__min_samples_leaf': 5, 'classifier__min_samples_split': 10, 'classifier__n_estimators': 100}	43	robust	lle	extra_trees	0.0199554
0.533399	0.0410986	0.398603	0.0309714	0.412727	0.0415936	{'classifier__max_depth': 20, 'classifier__min_samples_leaf': 5, 'classifier__min_samples_split': 10, 'classifier__n_estimators': 200}	52	robust	lle	extra_trees	0.0141235
0.6934	0.0484	0.399941	0.0346261	0.416319	0.0419471	{'classifier__max_depth': 20, 'classifier__min_samples_leaf': 5, 'classifier__min_samples_split': 10, 'classifier__n_estimators': 300}	41	robust	lle	extra_trees	0.0163776
0.996601	0.0664998	0.397928	0.0351269	0.413699	0.0423771	{'classifier__max_depth': 20, 'classifier__min_samples_leaf': 5, 'classifier__min_samples_split': 10, 'classifier__n_estimators': 500}	62	robust	lle	extra_trees	0.0157714
0.373	0.0321999	0.398603	0.0345393	0.414372	0.0411041	{'classifier__max_depth': 20, 'classifier__min_samples_leaf': 5, 'classifier__min_samples_split': 20, 'classifier__n_estimators': 100}	52	robust	lle	extra_trees	0.0157684
0.531101	0.0409994	0.399279	0.0321711	0.412801	0.041834	{'classifier__max_depth': 20, 'classifier__min_samples_leaf': 5, 'classifier__min_samples_split': 20, 'classifier__n_estimators': 200}	43	robust	lle	extra_trees	0.0135224
0.695574	0.0501	0.398594	0.0339295	0.414822	0.040829	{'classifier__max_depth': 20, 'classifier__min_samples_leaf': 5, 'classifier__min_samples_split': 20, 'classifier__n_estimators': 300}	58	robust	lle	extra_trees	0.0162274
0.993475	0.0656001	0.396585	0.0296142	0.41168	0.0412523	{'classifier__max_depth': 20, 'classifier__min_samples_leaf': 5, 'classifier__min_samples_split': 20, 'classifier__n_estimators': 500}	66	robust	lle	extra_trees	0.0150942
0.377518	0.0328002	0.389185	0.0273794	0.395291	0.0257002	{'classifier__max_depth': 20, 'classifier__min_samples_leaf': 10, 'classifier__min_samples_split': 2, 'classifier__n_estimators': 100}	99	robust	lle	extra_trees	0.00610683
0.528115	0.0392174	0.389198	0.0253526	0.398059	0.0247183	{'classifier__max_depth': 20, 'classifier__min_samples_leaf': 10, 'classifier__min_samples_split': 2, 'classifier__n_estimators': 200}	92	robust	lle	extra_trees	0.00886067
0.687271	0.0472998	0.390531	0.0291632	0.395515	0.023857	{'classifier__max_depth': 20, 'classifier__min_samples_leaf': 10, 'classifier__min_samples_split': 2, 'classifier__n_estimators': 300}	85	robust	lle	extra_trees	0.00498372
0.985855	0.0654996	0.389189	0.027609	0.398956	0.024741	{'classifier__max_depth': 20, 'classifier__min_samples_leaf': 10, 'classifier__min_samples_split': 2, 'classifier__n_estimators': 500}	94	robust	lle	extra_trees	0.00976716
0.381	0.0311	0.394581	0.0327948	0.400302	0.0237494	{'classifier__max_depth': 20, 'classifier__min_samples_leaf': 10, 'classifier__min_samples_split': 10, 'classifier__n_estimators': 100}	69	robust	lle	extra_trees	0.00572082
0.530201	0.0402993	0.391203	0.0292034	0.396713	0.0234434	{'classifier__max_depth': 20, 'classifier__min_samples_leaf': 10, 'classifier__min_samples_split': 10, 'classifier__n_estimators': 200}	80	robust	lle	extra_trees	0.00551013
0.685899	0.0476001	0.388518	0.0275129	0.394916	0.0206536	{'classifier__max_depth': 20, 'classifier__min_samples_leaf': 10, 'classifier__min_samples_split': 10, 'classifier__n_estimators': 300}	100	robust	lle	extra_trees	0.00639751
0.984	0.0636003	0.388518	0.0275129	0.393943	0.0227423	{'classifier__max_depth': 20, 'classifier__min_samples_leaf': 10, 'classifier__min_samples_split': 10, 'classifier__n_estimators': 500}	100	robust	lle	extra_trees	0.00542535
0.3779	0.0308001	0.390545	0.0274378	0.395364	0.0222432	{'classifier__max_depth': 20, 'classifier__min_samples_leaf': 10, 'classifier__min_samples_split': 20, 'classifier__n_estimators': 100}	82	robust	lle	extra_trees	0.00481885
0.534499	0.0407997	0.389878	0.0239408	0.39716	0.0206805	{'classifier__max_depth': 20, 'classifier__min_samples_leaf': 10, 'classifier__min_samples_split': 20, 'classifier__n_estimators': 200}	87	robust	lle	extra_trees	0.00728147
0.6768	0.0454	0.388518	0.0254727	0.396413	0.0238205	{'classifier__max_depth': 20, 'classifier__min_samples_leaf': 10, 'classifier__min_samples_split': 20, 'classifier__n_estimators': 300}	100	robust	lle	extra_trees	0.00789513
0.865588	0.0358994	0.390531	0.0275754	0.396114	0.022939	{'classifier__max_depth': 20, 'classifier__min_samples_leaf': 10, 'classifier__min_samples_split': 20, 'classifier__n_estimators': 500}	86	robust	lle	extra_trees	0.00558225
3808370423	0.0242172	0.426256	0.0526192	0.424244	0.0440875	{'classifier__alpha': 0.0001, 'classifier__hidden_layer_sizes': (50,)}	5	robust	lle	mlp	-0.00201207
4290743685	0.0267998	0.425562	0.0486448	0.427911	0.0440216	{'classifier__alpha': 0.0001, 'classifier__hidden_layer_sizes': (100,)}	6	robust	lle	mlp	0.0023484
3369752669	0.0244995	0.438355	0.0509562	0.439285	0.0452164	{'classifier__alpha': 0.0001, 'classifier__hidden_layer_sizes': (50, 50)}	2	robust	lle	mlp	0.000930524
3900231886	0.0243003	0.422887	0.0498209	0.424544	0.0440366	{'classifier__alpha': 0.001, 'classifier__hidden_layer_sizes': (50,)}	8	robust	lle	mlp	0.0016567
4260751677	0.0258169	0.425562	0.0509071	0.427387	0.0435737	{'classifier__alpha': 0.001, 'classifier__hidden_layer_sizes': (100,)}	6	robust	lle	mlp	0.0018249
378924849	0.0230164	0.443048	0.0510718	0.444522	0.0482823	{'classifier__alpha': 0.001, 'classifier__hidden_layer_sizes': (50, 50)}	1	robust	lle	mlp	0.00147402
3662419987	0.0233179	0.422225	0.0501395	0.424543	0.0446468	{'classifier__alpha': 0.01, 'classifier__hidden_layer_sizes': (50,)}	9	robust	lle	mlp	0.0023186
3706720066	0.0177994	0.426927	0.0524424	0.426489	0.0430853	{'classifier__alpha': 0.01, 'classifier__hidden_layer_sizes': (100,)}	4	robust	lle	mlp	-0.000437871
2816258478	0.0154999	0.434972	0.048891	0.439285	0.044463	{'classifier__alpha': 0.01, 'classifier__hidden_layer_sizes': (50, 50)}	3	robust	lle	mlp	0.00431293
0.485058	0.026201	0.376433	0.0020013	0.376431	0.000221608	{'classifier__C': 0.1, 'classifier__gamma': 'scale'}	3	robust	modified_lle	svm_linear	-1.976e-06
0.499061	0.0278997	0.376433	0.0020013	0.376431	0.000221608	{'classifier__C': 0.1, 'classifier__gamma': 'auto'}	3	robust	modified_lle	svm_linear	-1.976e-06
0.49596	0.0276004	0.376433	0.0020013	0.376431	0.000221608	{'classifier__C': 1, 'classifier__gamma': 'scale'}	3	robust	modified_lle	svm_linear	-1.976e-06
0.521756	0.0263016	0.376433	0.0020013	0.376431	0.000221608	{'classifier__C': 1, 'classifier__gamma': 'auto'}	3	robust	modified_lle	svm_linear	-1.976e-06
0.1707	0.0369008	0.463291	0.0239835	0.465619	0.00355894	{'classifier__C': 10, 'classifier__penalty': 'l1', 'classifier__solver': 'liblinear'}	1	quantile-normal	truncatedsvd	logistic_regression	0.00232777
0.195801	0.0380997	0.463291	0.0239835	0.465544	0.00348766	{'classifier__C': 10, 'classifier__penalty': 'l1', 'classifier__solver': 'liblinear'}	1	quantile-normal	ica	logistic_regression	0.00225292
0.535689	0.0456999	0.377775	0.00310118	0.378526	0.00366262	{'classifier__C': 0.1, 'classifier__gamma': 'scale'}	4	robust	modified_lle	svm_rbf	0.000750824
0.533288	0.0468002	0.376433	0.0020013	0.376431	0.000221608	{'classifier__C': 0.1, 'classifier__gamma': 'auto'}	5	robust	modified_lle	svm_rbf	-1.976e-06
0.568747	0.0464015	0.381135	0.00862482	0.386159	0.00816563	{'classifier__C': 1, 'classifier__gamma': 'scale'}	2	robust	modified_lle	svm_rbf	0.00502358
0.590264	0.0430155	0.376433	0.0020013	0.376431	0.000221608	{'classifier__C': 1, 'classifier__gamma': 'auto'}	5	robust	modified_lle	svm_rbf	-1.976e-06
0.0124005	0.00410037	0.437688	0.0203215	0.46502	0.00401456	{'classifier__max_depth': 5, 'classifier__min_samples_leaf': 5, 'classifier__min_samples_split': 20}	1	normalizer	truncatedsvd	decision_tree	0.0273323
0.403001	0.0276017	0.378451	0.00232603	0.380322	0.0044238	{'classifier__C': 10, 'classifier__gamma': 'auto'}	3	robust	modified_lle	svm_rbf	0.00187094
0.538465	0.0297005	0.376433	0.0020013	0.377329	0.00272555	{'classifier__C': 0.1, 'classifier__gamma': 'scale'}	2	robust	modified_lle	svm_sigmoid	0.000896228
0.534966	0.0282015	0.376433	0.0020013	0.376431	0.000221608	{'classifier__C': 0.1, 'classifier__gamma': 'auto'}	2	robust	modified_lle	svm_sigmoid	-1.976e-06
0.553563	0.0297998	0.361595	0.0209271	0.364836	0.0161309	{'classifier__C': 1, 'classifier__gamma': 'scale'}	5	robust	modified_lle	svm_sigmoid	0.0032406
0.558258	0.0282003	0.376433	0.0020013	0.376431	0.000221608	{'classifier__C': 1, 'classifier__gamma': 'auto'}	2	robust	modified_lle	svm_sigmoid	-1.976e-06
0.544144	0.0284483	0.356875	0.0240479	0.353165	0.0215221	{'classifier__C': 10, 'classifier__gamma': 'scale'}	6	robust	modified_lle	svm_sigmoid	-0.00370984
4285317898	0.0239005	0.456571	0.0147413	0.464349	0.0149088	{'classifier__alpha': 0.001, 'classifier__hidden_layer_sizes': (50, 50)}	1	normalizer	lle	mlp	0.00777842
0.447262	0.0237013	0.376433	0.0020013	0.376431	0.000221608	{'classifier__C': 0.1, 'classifier__penalty': 'l1', 'classifier__solver': 'liblinear'}	4	robust	modified_lle	logistic_regression	-1.976e-06
0.474264	0.0244	0.376433	0.0020013	0.376431	0.000221608	{'classifier__C': 0.1, 'classifier__penalty': 'l2', 'classifier__solver': 'liblinear'}	4	robust	modified_lle	logistic_regression	-1.976e-06
0.467852	0.0221998	0.37778	0.00199041	0.377703	0.00129509	{'classifier__C': 1, 'classifier__penalty': 'l1', 'classifier__solver': 'liblinear'}	2	robust	modified_lle	logistic_regression	-7.6785e-05
0.489773	0.0229012	0.376433	0.0020013	0.376431	0.000221608	{'classifier__C': 1, 'classifier__penalty': 'l2', 'classifier__solver': 'liblinear'}	4	robust	modified_lle	logistic_regression	-1.976e-06
0.1642	0.0119995	0.456557	0.0158703	0.461803	0.002429	{'classifier__C': 10, 'classifier__gamma': 'scale'}	1	quantile-uniform	truncatedsvd	svm_linear	0.00524589
0.355763	0.0160004	0.37778	0.00199041	0.378526	0.00161153	{'classifier__C': 10, 'classifier__penalty': 'l2', 'classifier__solver': 'liblinear'}	2	robust	modified_lle	logistic_regression	0.000746345
0.136398	0.00910032	0.456557	0.0158703	0.461803	0.002429	{'classifier__C': 10, 'classifier__gamma': 'auto'}	1	quantile-uniform	truncatedsvd	svm_linear	0.00524589
0.2592	0.0142009	0.265196	0.103558	0.288903	0.100663	{}	1	robust	modified_lle	gaussian_nb	0.0237074
0.593641	0.0326387	0.378455	0.0052097	0.378825	0.00437686	{'classifier__max_depth': None, 'classifier__min_samples_leaf': 5, 'classifier__min_samples_split': 2, 'classifier__n_estimators': 100}	28	robust	modified_lle	extra_trees	0.000369566
0.756074	0.0401	0.376433	0.00362436	0.379872	0.00545067	{'classifier__max_depth': None, 'classifier__min_samples_leaf': 5, 'classifier__min_samples_split': 2, 'classifier__n_estimators': 200}	68	robust	modified_lle	extra_trees	0.00343946
0.913853	0.0465172	0.376428	0.00310621	0.37875	0.00462685	{'classifier__max_depth': None, 'classifier__min_samples_leaf': 5, 'classifier__min_samples_split': 2, 'classifier__n_estimators': 300}	91	robust	modified_lle	extra_trees	0.00232197
1199171042	0.0654006	0.37778	0.00361836	0.378451	0.00425918	{'classifier__max_depth': None, 'classifier__min_samples_leaf': 5, 'classifier__min_samples_split': 2, 'classifier__n_estimators': 500}	35	robust	modified_lle	extra_trees	0.000671159
0.59885	0.0336007	0.37778	0.00361836	0.37905	0.00484463	{'classifier__max_depth': None, 'classifier__min_samples_leaf': 5, 'classifier__min_samples_split': 10, 'classifier__n_estimators': 100}	35	robust	modified_lle	extra_trees	0.00126991
0.784917	0.0439003	0.377104	0.00269475	0.378376	0.00390589	{'classifier__max_depth': None, 'classifier__min_samples_leaf': 5, 'classifier__min_samples_split': 10, 'classifier__n_estimators': 200}	51	robust	modified_lle	extra_trees	0.00127215
0.935975	0.0476002	0.377104	0.00404876	0.379049	0.00450526	{'classifier__max_depth': None, 'classifier__min_samples_leaf': 5, 'classifier__min_samples_split': 10, 'classifier__n_estimators': 300}	51	robust	modified_lle	extra_trees	0.00194524
1212457347	0.0628489	0.377109	0.00327765	0.379125	0.00536056	{'classifier__max_depth': None, 'classifier__min_samples_leaf': 5, 'classifier__min_samples_split': 10, 'classifier__n_estimators': 500}	47	robust	modified_lle	extra_trees	0.0020159
0.599431	0.032815	0.37778	0.00361836	0.378301	0.00374761	{'classifier__max_depth': None, 'classifier__min_samples_leaf': 5, 'classifier__min_samples_split': 20, 'classifier__n_estimators': 100}	35	robust	modified_lle	extra_trees	0.000521514
0.759581	0.0414006	0.377104	0.00269475	0.378227	0.00357035	{'classifier__max_depth': None, 'classifier__min_samples_leaf': 5, 'classifier__min_samples_split': 20, 'classifier__n_estimators': 200}	51	robust	modified_lle	extra_trees	0.00112256
0.916	0.0493001	0.377104	0.00269475	0.379124	0.00455746	{'classifier__max_depth': None, 'classifier__min_samples_leaf': 5, 'classifier__min_samples_split': 20, 'classifier__n_estimators': 300}	51	robust	modified_lle	extra_trees	0.00202026
119328444	0.0642208	0.377104	0.00269475	0.378526	0.00416655	{'classifier__max_depth': None, 'classifier__min_samples_leaf': 5, 'classifier__min_samples_split': 20, 'classifier__n_estimators': 500}	51	robust	modified_lle	extra_trees	0.00142185
0.605226	0.0323997	0.376433	0.0020013	0.376431	0.000221608	{'classifier__max_depth': None, 'classifier__min_samples_leaf': 10, 'classifier__min_samples_split': 2, 'classifier__n_estimators': 100}	68	robust	modified_lle	extra_trees	-1.976e-06
0.755168	0.040599	0.376433	0.0020013	0.376431	0.000221608	{'classifier__max_depth': None, 'classifier__min_samples_leaf': 10, 'classifier__min_samples_split': 2, 'classifier__n_estimators': 200}	68	robust	modified_lle	extra_trees	-1.976e-06
0.894099	0.0504004	0.376433	0.0020013	0.376431	0.000221608	{'classifier__max_depth': None, 'classifier__min_samples_leaf': 10, 'classifier__min_samples_split': 2, 'classifier__n_estimators': 300}	68	robust	modified_lle	extra_trees	-1.976e-06
1195865917	0.0660997	0.375082	0.0038965	0.37688	0.00129156	{'classifier__max_depth': None, 'classifier__min_samples_leaf': 10, 'classifier__min_samples_split': 2, 'classifier__n_estimators': 500}	96	robust	modified_lle	extra_trees	0.00179814
0.614299	0.0330999	0.376433	0.0020013	0.376431	0.000221608	{'classifier__max_depth': None, 'classifier__min_samples_leaf': 10, 'classifier__min_samples_split': 10, 'classifier__n_estimators': 100}	68	robust	modified_lle	extra_trees	-1.976e-06
0.771101	0.0410001	0.376433	0.0020013	0.376431	0.000221608	{'classifier__max_depth': None, 'classifier__min_samples_leaf': 10, 'classifier__min_samples_split': 10, 'classifier__n_estimators': 200}	68	robust	modified_lle	extra_trees	-1.976e-06
0.93335	0.0479993	0.376433	0.0020013	0.376431	0.000221608	{'classifier__max_depth': None, 'classifier__min_samples_leaf': 10, 'classifier__min_samples_split': 10, 'classifier__n_estimators': 300}	68	robust	modified_lle	extra_trees	-1.976e-06
1197666216	0.0654999	0.376433	0.0020013	0.376431	0.000221608	{'classifier__max_depth': None, 'classifier__min_samples_leaf': 10, 'classifier__min_samples_split': 10, 'classifier__n_estimators': 500}	68	robust	modified_lle	extra_trees	-1.976e-06
0.594336	0.0316999	0.375082	0.0038965	0.376655	0.00063678	{'classifier__max_depth': None, 'classifier__min_samples_leaf': 10, 'classifier__min_samples_split': 20, 'classifier__n_estimators': 100}	96	robust	modified_lle	extra_trees	0.00157376
0.762052	0.0411	0.376433	0.0020013	0.376581	0.000431278	{'classifier__max_depth': None, 'classifier__min_samples_leaf': 10, 'classifier__min_samples_split': 20, 'classifier__n_estimators': 200}	68	robust	modified_lle	extra_trees	0.000147613
0.90317	0.0483999	0.376433	0.0020013	0.376431	0.000221608	{'classifier__max_depth': None, 'classifier__min_samples_leaf': 10, 'classifier__min_samples_split': 20, 'classifier__n_estimators': 300}	68	robust	modified_lle	extra_trees	-1.976e-06
1188417125	0.0647002	0.376433	0.0020013	0.376431	0.000221608	{'classifier__max_depth': None, 'classifier__min_samples_leaf': 10, 'classifier__min_samples_split': 20, 'classifier__n_estimators': 500}	68	robust	modified_lle	extra_trees	-1.976e-06
0.609501	0.0326999	0.384514	0.013253	0.411674	0.0110788	{'classifier__max_depth': 10, 'classifier__min_samples_leaf': 1, 'classifier__min_samples_split': 20, 'classifier__n_estimators': 100}	23	robust	modified_lle	extra_trees	0.0271602
0.787487	0.042217	0.389207	0.0194804	0.4116	0.0104272	{'classifier__max_depth': 10, 'classifier__min_samples_leaf': 1, 'classifier__min_samples_split': 20, 'classifier__n_estimators': 200}	19	robust	modified_lle	extra_trees	0.0223927
0.934065	0.0495995	0.38518	0.0113352	0.412871	0.00984995	{'classifier__max_depth': 10, 'classifier__min_samples_leaf': 1, 'classifier__min_samples_split': 20, 'classifier__n_estimators': 300}	22	robust	modified_lle	extra_trees	0.0276906
1257638359	0.0680999	0.386536	0.0121735	0.412646	0.00997329	{'classifier__max_depth': 10, 'classifier__min_samples_leaf': 1, 'classifier__min_samples_split': 20, 'classifier__n_estimators': 500}	20	robust	modified_lle	extra_trees	0.0261098
0.596001	0.0321998	0.378455	0.00424385	0.3789	0.00442447	{'classifier__max_depth': 10, 'classifier__min_samples_leaf': 5, 'classifier__min_samples_split': 2, 'classifier__n_estimators': 100}	28	robust	modified_lle	extra_trees	0.000444472
0.777899	0.0402005	0.37778	0.00361836	0.379049	0.00466126	{'classifier__max_depth': 10, 'classifier__min_samples_leaf': 5, 'classifier__min_samples_split': 2, 'classifier__n_estimators': 200}	35	robust	modified_lle	extra_trees	0.00126968
0.9194	0.0479395	0.377775	0.00526846	0.379424	0.0046982	{'classifier__max_depth': 10, 'classifier__min_samples_leaf': 5, 'classifier__min_samples_split': 2, 'classifier__n_estimators': 300}	45	robust	modified_lle	extra_trees	0.0016483
1209033442	0.0688001	0.377104	0.00269475	0.379274	0.00449593	{'classifier__max_depth': 10, 'classifier__min_samples_leaf': 5, 'classifier__min_samples_split': 2, 'classifier__n_estimators': 500}	51	robust	modified_lle	extra_trees	0.00216985
0.603012	0.0324186	0.377775	0.00526846	0.379424	0.00466462	{'classifier__max_depth': 10, 'classifier__min_samples_leaf': 5, 'classifier__min_samples_split': 10, 'classifier__n_estimators': 100}	44	robust	modified_lle	extra_trees	0.00164847
0.751971	0.0409998	0.378455	0.00424385	0.379124	0.00459197	{'classifier__max_depth': 10, 'classifier__min_samples_leaf': 5, 'classifier__min_samples_split': 10, 'classifier__n_estimators': 200}	28	robust	modified_lle	extra_trees	0.000668743
0.900734	0.0491007	0.377104	0.00269475	0.378825	0.00403087	{'classifier__max_depth': 10, 'classifier__min_samples_leaf': 5, 'classifier__min_samples_split': 10, 'classifier__n_estimators': 300}	51	robust	modified_lle	extra_trees	0.00172092
1214488077	0.0639998	0.378455	0.00424385	0.378825	0.0046349	{'classifier__max_depth': 10, 'classifier__min_samples_leaf': 5, 'classifier__min_samples_split': 10, 'classifier__n_estimators': 500}	28	robust	modified_lle	extra_trees	0.000369678
0.608288	0.0314	0.377104	0.00269475	0.378676	0.00427283	{'classifier__max_depth': 10, 'classifier__min_samples_leaf': 5, 'classifier__min_samples_split': 20, 'classifier__n_estimators': 100}	51	robust	modified_lle	extra_trees	0.0015715
0.800974	0.0396004	0.377104	0.00269475	0.378825	0.00430458	{'classifier__max_depth': 10, 'classifier__min_samples_leaf': 5, 'classifier__min_samples_split': 20, 'classifier__n_estimators': 200}	51	robust	modified_lle	extra_trees	0.00172097
0.9103	0.0496001	0.378455	0.0052097	0.378975	0.00426822	{'classifier__max_depth': 10, 'classifier__min_samples_leaf': 5, 'classifier__min_samples_split': 20, 'classifier__n_estimators': 300}	28	robust	modified_lle	extra_trees	0.000519267
1205400109	0.0647996	0.37778	0.00361836	0.37875	0.0040959	{'classifier__max_depth': 10, 'classifier__min_samples_leaf': 5, 'classifier__min_samples_split': 20, 'classifier__n_estimators': 500}	35	robust	modified_lle	extra_trees	0.00097056
0.6024	0.0348999	0.376433	0.0020013	0.37688	0.000879236	{'classifier__max_depth': 10, 'classifier__min_samples_leaf': 10, 'classifier__min_samples_split': 2, 'classifier__n_estimators': 100}	68	robust	modified_lle	extra_trees	0.00044679
0.7523	0.0400003	0.375082	0.0038965	0.376805	0.00107077	{'classifier__max_depth': 10, 'classifier__min_samples_leaf': 10, 'classifier__min_samples_split': 2, 'classifier__n_estimators': 200}	96	robust	modified_lle	extra_trees	0.00172335
0.905768	0.0501001	0.375757	0.00234203	0.377104	0.00195883	{'classifier__max_depth': 10, 'classifier__min_samples_leaf': 10, 'classifier__min_samples_split': 2, 'classifier__n_estimators': 300}	92	robust	modified_lle	extra_trees	0.00134685
1182067132	0.0674001	0.376433	0.0020013	0.376431	0.000221608	{'classifier__max_depth': 10, 'classifier__min_samples_leaf': 10, 'classifier__min_samples_split': 2, 'classifier__n_estimators': 500}	68	robust	modified_lle	extra_trees	-1.976e-06
0.607101	0.0317998	0.377109	0.00327765	0.37673	0.000851864	{'classifier__max_depth': 10, 'classifier__min_samples_leaf': 10, 'classifier__min_samples_split': 10, 'classifier__n_estimators': 100}	47	robust	modified_lle	extra_trees	-0.000378474
0.750598	0.0400995	0.376433	0.0020013	0.376955	0.00151341	{'classifier__max_depth': 10, 'classifier__min_samples_leaf': 10, 'classifier__min_samples_split': 10, 'classifier__n_estimators': 200}	68	robust	modified_lle	extra_trees	0.000521584
0.908501	0.0486995	0.376433	0.0020013	0.376431	0.000221608	{'classifier__max_depth': 10, 'classifier__min_samples_leaf': 10, 'classifier__min_samples_split': 10, 'classifier__n_estimators': 300}	68	robust	modified_lle	extra_trees	-1.976e-06
1186799955	0.0635997	0.375082	0.0038965	0.37673	0.000851864	{'classifier__max_depth': 10, 'classifier__min_samples_leaf': 10, 'classifier__min_samples_split': 10, 'classifier__n_estimators': 500}	96	robust	modified_lle	extra_trees	0.00164855
0.594798	0.0347	0.376433	0.0020013	0.376431	0.000221608	{'classifier__max_depth': 10, 'classifier__min_samples_leaf': 10, 'classifier__min_samples_split': 20, 'classifier__n_estimators': 100}	68	robust	modified_lle	extra_trees	-1.976e-06
0.74621	0.0421002	0.376433	0.0020013	0.376431	0.000221608	{'classifier__max_depth': 10, 'classifier__min_samples_leaf': 10, 'classifier__min_samples_split': 20, 'classifier__n_estimators': 200}	68	robust	modified_lle	extra_trees	-1.976e-06
0.904084	0.048801	0.376433	0.0020013	0.376431	0.000221608	{'classifier__max_depth': 10, 'classifier__min_samples_leaf': 10, 'classifier__min_samples_split': 20, 'classifier__n_estimators': 300}	68	robust	modified_lle	extra_trees	-1.976e-06
1192437005	0.0683001	0.376433	0.0020013	0.376431	0.000221608	{'classifier__max_depth': 10, 'classifier__min_samples_leaf': 10, 'classifier__min_samples_split': 20, 'classifier__n_estimators': 500}	68	robust	modified_lle	extra_trees	-1.976e-06
0.596419	0.0327995	0.377104	0.00269475	0.379125	0.00500881	{'classifier__max_depth': 20, 'classifier__min_samples_leaf': 5, 'classifier__min_samples_split': 2, 'classifier__n_estimators': 100}	51	robust	modified_lle	extra_trees	0.00202049
0.743253	0.0408173	0.37778	0.00361836	0.37905	0.00532021	{'classifier__max_depth': 20, 'classifier__min_samples_leaf': 5, 'classifier__min_samples_split': 2, 'classifier__n_estimators': 200}	35	robust	modified_lle	extra_trees	0.00126979
0.911102	0.0480999	0.377104	0.00404876	0.37905	0.00443232	{'classifier__max_depth': 20, 'classifier__min_samples_leaf': 5, 'classifier__min_samples_split': 2, 'classifier__n_estimators': 300}	51	robust	modified_lle	extra_trees	0.00194541
1213000107	0.0659004	0.377104	0.00269475	0.3789	0.00456626	{'classifier__max_depth': 20, 'classifier__min_samples_leaf': 5, 'classifier__min_samples_split': 2, 'classifier__n_estimators': 500}	51	robust	modified_lle	extra_trees	0.00179588
0.5991	0.0317998	0.37778	0.00361836	0.37905	0.00439931	{'classifier__max_depth': 20, 'classifier__min_samples_leaf': 5, 'classifier__min_samples_split': 10, 'classifier__n_estimators': 100}	35	robust	modified_lle	extra_trees	0.00126979
0.752566	0.0412001	0.37778	0.00361836	0.37875	0.00473693	{'classifier__max_depth': 20, 'classifier__min_samples_leaf': 5, 'classifier__min_samples_split': 10, 'classifier__n_estimators': 200}	35	robust	modified_lle	extra_trees	0.000970504
0.913964	0.0489001	0.378455	0.00424385	0.37905	0.00490439	{'classifier__max_depth': 20, 'classifier__min_samples_leaf': 5, 'classifier__min_samples_split': 10, 'classifier__n_estimators': 300}	28	robust	modified_lle	extra_trees	0.000594117
1201931858	0.0652014	0.37778	0.00361836	0.378676	0.00449742	{'classifier__max_depth': 20, 'classifier__min_samples_leaf': 5, 'classifier__min_samples_split': 10, 'classifier__n_estimators': 500}	35	robust	modified_lle	extra_trees	0.000895765
0.607801	0.0329984	0.377104	0.00269475	0.3789	0.00414517	{'classifier__max_depth': 20, 'classifier__min_samples_leaf': 5, 'classifier__min_samples_split': 20, 'classifier__n_estimators': 100}	51	robust	modified_lle	extra_trees	0.00179577
0.7735	0.0399007	0.377104	0.00269475	0.378601	0.003951	{'classifier__max_depth': 20, 'classifier__min_samples_leaf': 5, 'classifier__min_samples_split': 20, 'classifier__n_estimators': 200}	51	robust	modified_lle	extra_trees	0.00149665
0.907501	0.0491996	0.377104	0.00269475	0.378526	0.00416655	{'classifier__max_depth': 20, 'classifier__min_samples_leaf': 5, 'classifier__min_samples_split': 20, 'classifier__n_estimators': 300}	51	robust	modified_lle	extra_trees	0.00142185
1196499658	0.0650003	0.377104	0.00269475	0.378226	0.00337813	{'classifier__max_depth': 20, 'classifier__min_samples_leaf': 5, 'classifier__min_samples_split': 20, 'classifier__n_estimators': 500}	51	robust	modified_lle	extra_trees	0.00112228
0.5948	0.0305994	0.377109	0.00327765	0.377029	0.00129258	{'classifier__max_depth': 20, 'classifier__min_samples_leaf': 10, 'classifier__min_samples_split': 2, 'classifier__n_estimators': 100}	47	robust	modified_lle	extra_trees	-7.9296e-05
0.7762	0.0400995	0.375757	0.00234203	0.377104	0.00195883	{'classifier__max_depth': 20, 'classifier__min_samples_leaf': 10, 'classifier__min_samples_split': 2, 'classifier__n_estimators': 200}	92	robust	modified_lle	extra_trees	0.00134685
0.899782	0.0503003	0.375757	0.00234203	0.377104	0.00195883	{'classifier__max_depth': 20, 'classifier__min_samples_leaf': 10, 'classifier__min_samples_split': 2, 'classifier__n_estimators': 300}	92	robust	modified_lle	extra_trees	0.00134685
1205364013	0.0664002	0.375082	0.0038965	0.37688	0.00129156	{'classifier__max_depth': 20, 'classifier__min_samples_leaf': 10, 'classifier__min_samples_split': 2, 'classifier__n_estimators': 500}	96	robust	modified_lle	extra_trees	0.00179814
0.5928	0.0323998	0.376433	0.0020013	0.376431	0.000221608	{'classifier__max_depth': 20, 'classifier__min_samples_leaf': 10, 'classifier__min_samples_split': 10, 'classifier__n_estimators': 100}	68	robust	modified_lle	extra_trees	-1.976e-06
0.752698	0.0434003	0.375082	0.0038965	0.376955	0.00151341	{'classifier__max_depth': 20, 'classifier__min_samples_leaf': 10, 'classifier__min_samples_split': 10, 'classifier__n_estimators': 200}	96	robust	modified_lle	extra_trees	0.00187294
0.8998	0.0486002	0.375757	0.00234203	0.37688	0.00129156	{'classifier__max_depth': 20, 'classifier__min_samples_leaf': 10, 'classifier__min_samples_split': 10, 'classifier__n_estimators': 300}	92	robust	modified_lle	extra_trees	0.00112247
1202500105	0.0656003	0.377109	0.00327765	0.376581	0.000431278	{'classifier__max_depth': 20, 'classifier__min_samples_leaf': 10, 'classifier__min_samples_split': 10, 'classifier__n_estimators': 500}	47	robust	modified_lle	extra_trees	-0.000528062
0.6075	0.0337	0.376433	0.0020013	0.376431	0.000221608	{'classifier__max_depth': 20, 'classifier__min_samples_leaf': 10, 'classifier__min_samples_split': 20, 'classifier__n_estimators': 100}	68	robust	modified_lle	extra_trees	-1.976e-06
0.759298	0.0411	0.375082	0.0038965	0.376805	0.00107077	{'classifier__max_depth': 20, 'classifier__min_samples_leaf': 10, 'classifier__min_samples_split': 20, 'classifier__n_estimators': 200}	96	robust	modified_lle	extra_trees	0.00172335
0.9005	0.0461998	0.376433	0.0020013	0.376431	0.000221608	{'classifier__max_depth': 20, 'classifier__min_samples_leaf': 10, 'classifier__min_samples_split': 20, 'classifier__n_estimators': 300}	68	robust	modified_lle	extra_trees	-1.976e-06
1015900731	0.0346999	0.376433	0.0020013	0.376431	0.000221608	{'classifier__max_depth': 20, 'classifier__min_samples_leaf': 10, 'classifier__min_samples_split': 20, 'classifier__n_estimators': 500}	68	robust	modified_lle	extra_trees	-1.976e-06
3378031802	0.0250198	0.383144	0.0118393	0.383241	0.00567777	{'classifier__alpha': 0.0001, 'classifier__hidden_layer_sizes': (50,)}	7	robust	modified_lle	mlp	9.6481e-05
4027785087	0.0241001	0.383144	0.0118393	0.38354	0.00714868	{'classifier__alpha': 0.0001, 'classifier__hidden_layer_sizes': (100,)}	7	robust	modified_lle	mlp	0.00039549
0.872469	0.0303862	0.462652	0.0232003	0.459708	0.00337614	{'classifier__C': 10, 'classifier__penalty': 'l1', 'classifier__solver': 'liblinear'}	1	normalizer	isomap	logistic_regression	-0.0029441
3294706416	0.0250001	0.383144	0.0125869	0.382567	0.00626001	{'classifier__alpha': 0.001, 'classifier__hidden_layer_sizes': (50,)}	6	robust	modified_lle	mlp	-0.000577228
3916434002	0.0245996	0.384491	0.0132748	0.383839	0.00748547	{'classifier__alpha': 0.001, 'classifier__hidden_layer_sizes': (100,)}	4	robust	modified_lle	mlp	-0.00065187
5099300933	0.0218	0.392568	0.0209816	0.399704	0.0209791	{'classifier__alpha': 0.001, 'classifier__hidden_layer_sizes': (50, 50)}	2	robust	modified_lle	mlp	0.00713673
2739066005	0.0228997	0.384491	0.0129263	0.381894	0.00529865	{'classifier__alpha': 0.01, 'classifier__hidden_layer_sizes': (50,)}	4	robust	modified_lle	mlp	-0.00259736
3179311895	0.0206006	0.383144	0.0118393	0.382193	0.00517947	{'classifier__alpha': 0.01, 'classifier__hidden_layer_sizes': (100,)}	7	robust	modified_lle	mlp	-0.000951367
2885069537	0.0154003	0.387167	0.020327	0.390651	0.0166007	{'classifier__alpha': 0.01, 'classifier__hidden_layer_sizes': (50, 50)}	3	robust	modified_lle	mlp	0.00348424
0.179815	0.0154037	0.457913	0.0137319	0.457763	0.00265583	{'classifier__C': 0.1, 'classifier__gamma': 'auto'}	1	quantile-uniform	pca	svm_sigmoid	-0.000150125
0.408472	0.0162001	0.455247	0.0246393	0.457087	0.0172448	{}	1	yeo-johnson	modified_lle	lda	0.00184035
0.0653001	0.00579987	0.455179	0.019287	0.45664	0.00341994	{}	1	quantile-uniform	truncatedsvd	lda	0.0014614
0.0267006	0.00509996	0.455233	0.0217681	0.456192	0.00347871	{'classifier__C': 0.1, 'classifier__penalty': 'l2', 'classifier__solver': 'liblinear'}	1	normalizer	ica	logistic_regression	0.000958496
0.256137	0.00450032	0.453183	0.0124904	0.454545	0.00245552	{'classifier__C': 10, 'classifier__penalty': 'l1', 'classifier__solver': 'liblinear'}	1	minmax	truncatedsvd	logistic_regression	0.00136205
0.438612	0.0565015	0.451179	0.00943906	0.454175	0.0140755	{'classifier__C': 10, 'classifier__gamma': 'scale'}	1	quantile-normal	lle	svm_linear	0.00299585
0.329134	0.0404013	0.451179	0.00943906	0.454175	0.0140755	{'classifier__C': 10, 'classifier__gamma': 'auto'}	1	quantile-normal	lle	svm_linear	0.00299585
0.0262001	0.00510004	0.451868	0.0212513	0.452974	0.00360904	{'classifier__C': 1, 'classifier__penalty': 'l1', 'classifier__solver': 'liblinear'}	1	normalizer	pca	logistic_regression	0.00110605
0.276106	0.0136983	0.448467	0.0219637	0.45193	0.0220131	{}	1	maxabs	modified_lle	lda	0.00346284
0.287755	0.0150002	0.446495	0.0207942	0.447288	0.00328984	{'classifier__C': 0.1, 'classifier__gamma': 'scale'}	1	yeo-johnson	pca	svm_sigmoid	0.000793553
0.30092	0.0153847	0.446495	0.0207942	0.447288	0.00328984	{'classifier__C': 0.1, 'classifier__gamma': 'scale'}	1	yeo-johnson	truncatedsvd	svm_sigmoid	0.000793553
0.1806	0.0160009	0.445801	0.0176489	0.446091	0.00421315	{'classifier__C': 0.1, 'classifier__gamma': 'scale'}	1	quantile-uniform	ica	svm_sigmoid	0.000289819
0.194198	0.0166998	0.445801	0.0176489	0.446091	0.00421315	{'classifier__C': 0.1, 'classifier__gamma': 'auto'}	1	quantile-uniform	ica	svm_sigmoid	0.000289819
0.145202	0.0137983	0.444436	0.0150136	0.446019	0.0194899	{}	1	maxabs	lle	lda	0.00158295
0.153503	0.0138972	0.439742	0.0208376	0.445119	0.0164695	{}	1	standard	lle	lda	0.00537635
0.208396	0.0453016	0.441085	0.0111416	0.443097	0.00405567	{'classifier__C': 0.1, 'classifier__gamma': 'scale'}	1	quantile-normal	pca	svm_sigmoid	0.00201272
0.212501	0.0441994	0.440409	0.011437	0.442948	0.00407827	{'classifier__C': 0.1, 'classifier__gamma': 'scale'}	1	quantile-normal	truncatedsvd	svm_sigmoid	0.0025388
0.171297	0.00330014	0.44444	0.0157482	0.441976	0.00373036	{'classifier__C': 10, 'classifier__penalty': 'l1', 'classifier__solver': 'liblinear'}	1	maxabs	truncatedsvd	logistic_regression	-0.00246479
0.734089	0.0274613	0.445783	0.0222418	0.441379	0.0109897	{'classifier__C': 10, 'classifier__penalty': 'l1', 'classifier__solver': 'liblinear'}	1	yeo-johnson	modified_lle	logistic_regression	-0.00440369
0.211692	0.0079191	0.442445	0.0146755	0.440554	0.0023494	{'classifier__C': 1, 'classifier__penalty': 'l1', 'classifier__solver': 'liblinear'}	1	quantile-uniform	truncatedsvd	logistic_regression	-0.00189161
0.411156	0.0329175	0.437724	0.0221003	0.439507	0.019025	{'classifier__C': 10, 'classifier__penalty': 'l1', 'classifier__solver': 'liblinear'}	1	minmax	lle	logistic_regression	0.00178249
0.0932003	0.0133999	0.437031	0.0236463	0.438757	0.00510841	{'classifier__C': 0.1, 'classifier__gamma': 'scale'}	1	normalizer	ica	svm_sigmoid	0.0017268
0.107699	0.0134995	0.437031	0.0236463	0.438757	0.00510841	{'classifier__C': 0.1, 'classifier__gamma': 'auto'}	1	normalizer	ica	svm_sigmoid	0.0017268
0.302343	0.0160007	0.439761	0.0177449	0.438534	0.00474343	{'classifier__C': 0.1, 'classifier__gamma': 'scale'}	1	yeo-johnson	ica	svm_sigmoid	-0.00122649
0.281701	0.0298013	0.436337	0.0249975	0.436665	0.0135491	{'classifier__C': 0.1, 'classifier__gamma': 'scale'}	1	normalizer	lle	svm_sigmoid	0.000328554
0.2242	0.044619	0.434355	0.0135099	0.434568	0.00269922	{'classifier__C': 0.1, 'classifier__gamma': 'scale'}	1	quantile-normal	ica	svm_sigmoid	0.000212801
0.265065	0.0462912	0.434355	0.0135099	0.434568	0.00269922	{'classifier__C': 0.1, 'classifier__gamma': 'auto'}	1	quantile-normal	ica	svm_sigmoid	0.000212801
0.551901	0.028501	0.437035	0.0195238	0.43412	0.0221775	{'classifier__C': 0.1, 'classifier__gamma': 'scale'}	1	maxabs	modified_lle	svm_sigmoid	-0.0029151
0.0120024	0.0031004	0.430292	0.0237594	0.431649	0.00445718	{}	1	normalizer	truncatedsvd	lda	0.00135743
0.273197	0.033301	0.41545	0.0247586	0.430678	0.0282573	{'classifier__C': 1, 'classifier__gamma': 'auto'}	1	quantile-uniform	random_projection	svm_rbf	0.0152279
0.281268	0.0142011	0.421563	0.0236016	0.430303	0.0170911	{}	1	standard	modified_lle	gaussian_nb	0.00874045
0.0109997	0.00399997	0.428941	0.0248965	0.429555	0.0041488	{}	1	normalizer	truncatedsvd	gaussian_nb	0.00061393
0.537202	0.0516988	0.433661	0.022924	0.427087	0.0189389	{'classifier__C': 0.1, 'classifier__gamma': 'scale'}	1	minmax	lle	svm_sigmoid	-0.00657394
0.501853	0.0261003	0.425571	0.0185069	0.426939	0.0184692	{'classifier__C': 10, 'classifier__gamma': 'scale'}	1	maxabs	modified_lle	svm_linear	0.00136729
1.08044	0.0275003	0.418824	0.0230729	0.426938	0.0252857	{'classifier__C': 10, 'classifier__gamma': 'scale'}	1	minmax	modified_lle	svm_poly	0.00811452
0.129601	0.00559912	0.420833	0.0246754	0.426264	0.0232905	{}	1	yeo-johnson	random_projection	gaussian_nb	0.0054312
0.0989195	0.00980012	0.423567	0.0248305	0.423793	0.00295538	{'classifier__C': 10, 'classifier__gamma': 'auto'}	1	normalizer	truncatedsvd	svm_sigmoid	0.000226471
4142000365	0.0300134	0.414797	0.0233939	0.422972	0.0184938	{'classifier__C': 10, 'classifier__gamma': 'scale'}	1	quantile-normal	random_projection	svm_linear	0.00817498
0.0623962	0.0103	0.422887	0.0242178	0.422671	0.00271052	{'classifier__C': 1, 'classifier__gamma': 'scale'}	1	normalizer	truncatedsvd	svm_linear	-0.000215738
0.0618969	0.00970056	0.422887	0.0242178	0.422671	0.00271052	{'classifier__C': 1, 'classifier__gamma': 'auto'}	1	normalizer	truncatedsvd	svm_linear	-0.000215738
0.2987	0.0271003	0.419518	0.0115537	0.422449	0.0147784	{'classifier__C': 10, 'classifier__gamma': 'scale'}	1	maxabs	lle	svm_linear	0.00293176
0.2205	0.0185998	0.419518	0.0115537	0.422449	0.0147784	{'classifier__C': 10, 'classifier__gamma': 'auto'}	1	maxabs	lle	svm_linear	0.00293176
0.0798992	0.00460036	0.421522	0.0196225	0.419831	0.0141142	{'classifier__C': 1, 'classifier__penalty': 'l1', 'classifier__solver': 'liblinear'}	1	maxabs	random_projection	logistic_regression	-0.00169089
0.323159	0.0282007	0.41277	0.0160609	0.419459	0.0239043	{'classifier__C': 0.1, 'classifier__gamma': 'scale'}	1	maxabs	lle	svm_sigmoid	0.00668947
0.540113	0.0527283	0.416162	0.0129569	0.418333	0.0147203	{'classifier__C': 10, 'classifier__gamma': 'scale'}	1	minmax	lle	svm_linear	0.00217093
0.347184	0.0287007	0.416162	0.0129569	0.418333	0.0147203	{'classifier__C': 10, 'classifier__gamma': 'auto'}	1	minmax	lle	svm_linear	0.00217093
0.00989931	0.00370004	0.402036	0.0241878	0.417209	0.0264335	{}	1	normalizer	random_projection	lda	0.0151733
0.00989986	0.0032995	0.418166	0.0239021	0.416237	0.0227298	{}	1	normalizer	random_projection	gaussian_nb	-0.00192879
0.3172	0.0262001	0.41077	0.0145564	0.41594	0.016221	{'classifier__C': 10, 'classifier__gamma': 'scale'}	1	standard	lle	svm_linear	0.00516981
0.237598	0.0172003	0.41077	0.0145564	0.41594	0.016221	{'classifier__C': 10, 'classifier__gamma': 'auto'}	1	standard	lle	svm_linear	0.00516981
0.0204998	0.00390003	0.390581	0.0192278	0.415785	0.0114647	{'classifier__max_depth': 5, 'classifier__min_samples_leaf': 5, 'classifier__min_samples_split': 20}	1	robust	pca	decision_tree	0.0252041
0.472425	0.0406306	0.410752	0.0201165	0.413994	0.0216455	{'classifier__C': 10, 'classifier__gamma': 'auto'}	1	quantile-normal	modified_lle	svm_linear	0.00324224
0.637244	0.0585154	0.410752	0.0201165	0.41377	0.0217244	{'classifier__C': 10, 'classifier__gamma': 'scale'}	1	quantile-normal	modified_lle	svm_linear	0.00301785
0.250611	0.00940037	0.41282	0.0200113	0.413241	0.0199249	{'classifier__C': 10, 'classifier__gamma': 'auto'}	1	quantile-uniform	random_projection	svm_linear	0.000421638
2472638772	0.0238044	0.420189	0.0143786	0.411974	0.0164403	{'classifier__C': 1, 'classifier__gamma': 'scale'}	1	maxabs	nca	svm_sigmoid	-0.00821467
0.018899	0.00360017	0.407437	0.0169556	0.41167	0.0146952	{'classifier__C': 10, 'classifier__penalty': 'l2', 'classifier__solver': 'liblinear'}	1	standard	random_projection	logistic_regression	0.00423268
0.816528	0.0457996	0.411441	0.0172091	0.410177	0.0202213	{'classifier__C': 1, 'classifier__gamma': 'scale'}	1	minmax	modified_lle	svm_sigmoid	-0.00126452
0.0353994	0.00650001	0.414838	0.0225708	0.409275	0.0168975	{'classifier__C': 1, 'classifier__penalty': 'l2', 'classifier__solver': 'liblinear'}	1	minmax	random_projection	logistic_regression	-0.0055626
2634339333	0.00540018	0.384537	0.0157785	0.407708	0.0183275	{'classifier__alpha': 0.0001, 'classifier__hidden_layer_sizes': (50, 50)}	1	robust	truncatedsvd	mlp	0.0231715
0.0170004	0.0030999	0.409459	0.021	0.405086	0.0202119	{}	1	robust	random_projection	gaussian_nb	-0.00437317
0.73449	0.0310167	0.40405	0.0130076	0.404115	0.00875216	{'classifier__C': 10, 'classifier__gamma': 'scale'}	1	yeo-johnson	modified_lle	svm_linear	6.5568e-05
2362930417	0.00510027	0.382487	0.00752261	0.40322	0.0194965	{'classifier__alpha': 0.0001, 'classifier__hidden_layer_sizes': (50, 50)}	1	robust	pca	mlp	0.0207327
0.0193992	0.00310044	0.397987	0.00993828	0.402767	0.0176062	{}	1	robust	random_projection	lda	0.00478003
0.1314	0.0052001	0.402648	0.0216072	0.402619	0.0158856	{}	1	yeo-johnson	random_projection	lda	-2.9645e-05
0.945849	0.0382251	0.397288	0.0183842	0.402023	0.0215024	{'classifier__C': 0.1, 'classifier__penalty': 'l2', 'classifier__solver': 'liblinear'}	1	robust	isomap	logistic_regression	0.00473503
0.932865	0.046704	0.399977	0.0190563	0.399927	0.0227404	{'classifier__C': 0.1, 'classifier__gamma': 'scale'}	1	robust	isomap	svm_sigmoid	-4.9937e-05
0.857768	0.0447004	0.399995	0.0224732	0.399476	0.0162382	{'classifier__C': 10, 'classifier__gamma': 'scale'}	1	minmax	modified_lle	svm_linear	-0.000519137
5088388801	0.0241003	0.394572	0.0227914	0.398582	0.0214717	{'classifier__alpha': 0.0001, 'classifier__hidden_layer_sizes': (50, 50)}	1	robust	modified_lle	mlp	0.00401035
0.0295014	0.00430016	0.401329	0.0114207	0.397456	0.0105843	{'classifier__C': 0.1, 'classifier__penalty': 'l2', 'classifier__solver': 'liblinear'}	1	robust	random_projection	logistic_regression	-0.00387252
0.279432	0.0272011	0.393248	0.0148803	0.395887	0.0169739	{'classifier__C': 10, 'classifier__gamma': 'scale'}	1	robust	lle	svm_linear	0.00263887
0.215798	0.0180007	0.393248	0.0148803	0.395887	0.0169739	{'classifier__C': 10, 'classifier__gamma': 'auto'}	1	robust	lle	svm_linear	0.00263887
4198805451	0.00560064	0.381825	0.00872224	0.395436	0.00433738	{'classifier__alpha': 0.01, 'classifier__hidden_layer_sizes': (50,)}	1	robust	ica	mlp	0.0136112
0.588951	0.0428009	0.381793	0.0123172	0.393118	0.0124241	{'classifier__C': 10, 'classifier__gamma': 'scale'}	1	robust	modified_lle	svm_rbf	0.0113252
0.279518	0.0286011	0.377771	0.0093848	0.389674	0.00397421	{'classifier__C': 10, 'classifier__gamma': 'scale'}	1	robust	truncatedsvd	svm_rbf	0.0119036
0.224555	0.017801	0.387221	0.0106187	0.389525	0.0023875	{'classifier__C': 1, 'classifier__gamma': 'scale'}	1	quantile-uniform	truncatedsvd	svm_sigmoid	0.00230432
0.102201	0.0135	0.387874	0.0236227	0.388927	0.0252987	{'classifier__C': 1, 'classifier__gamma': 'auto'}	1	normalizer	random_projection	svm_sigmoid	0.0010528
0.0969991	0.0124994	0.383167	0.0102032	0.383013	0.0130841	{'classifier__C': 0.1, 'classifier__gamma': 'scale'}	1	standard	random_projection	svm_sigmoid	-0.000154439
0.273299	0.0371998	0.381145	0.0060296	0.381145	0.00297248	{'classifier__C': 1, 'classifier__gamma': 'scale'}	1	minmax	truncatedsvd	svm_sigmoid	4.91e-07
0.517178	0.0254999	0.379807	0.00501064	0.38107	0.0018642	{'classifier__C': 10, 'classifier__penalty': 'l1', 'classifier__solver': 'liblinear'}	1	standard	modified_lle	logistic_regression	0.00126316
0.281896	0.0133997	0.378455	0.00297985	0.380696	0.000818196	{}	1	standard	modified_lle	lda	0.00224043
0.507858	0.024299	0.378451	0.00232603	0.380322	0.0044238	{'classifier__C': 10, 'classifier__gamma': 'scale'}	1	robust	modified_lle	svm_linear	0.00187094
0.356457	0.0171004	0.378451	0.00232603	0.380322	0.0044238	{'classifier__C': 10, 'classifier__gamma': 'auto'}	1	robust	modified_lle	svm_linear	0.00187094
0.46257	0.0234991	0.378451	0.00232603	0.380322	0.0044238	{'classifier__C': 10, 'classifier__penalty': 'l1', 'classifier__solver': 'liblinear'}	1	robust	modified_lle	logistic_regression	0.00187094
0.234798	0.00789964	0.378455	0.00424385	0.380097	0.00278798	{'classifier__C': 10, 'classifier__gamma': 'scale'}	1	robust	ica	svm_linear	0.00164174
0.216501	0.00739942	0.378455	0.00424385	0.380097	0.00278798	{'classifier__C': 10, 'classifier__gamma': 'auto'}	1	robust	ica	svm_linear	0.00164174
6451931265	0.00849998	0.379131	0.00358945	0.380022	0.00241437	{'classifier__C': 10, 'classifier__gamma': 'scale'}	1	robust	pca	svm_linear	0.000891271
6438366423	0.00819981	0.379131	0.00358945	0.380022	0.00241437	{'classifier__C': 10, 'classifier__gamma': 'auto'}	1	robust	pca	svm_linear	0.000891271
0.515761	0.0269989	0.379131	0.00358945	0.379948	0.000331329	{'classifier__C': 10, 'classifier__gamma': 'scale'}	1	standard	modified_lle	svm_linear	0.000816533
0.394661	0.0204015	0.379131	0.00358945	0.379948	0.000331329	{'classifier__C': 10, 'classifier__gamma': 'auto'}	1	standard	modified_lle	svm_linear	0.000816533
3744742411	0.00809994	0.379131	0.00358945	0.379873	0.00238175	{'classifier__C': 1, 'classifier__gamma': 'scale'}	1	robust	pca	svm_linear	0.000741626
3736780144	0.00830073	0.379131	0.00358945	0.379873	0.00238175	{'classifier__C': 1, 'classifier__gamma': 'auto'}	1	robust	pca	svm_linear	0.000741626
1591024696	0.00880027	0.378455	0.00297985	0.379798	0.00278717	{'classifier__C': 0.1, 'classifier__gamma': 'scale'}	1	robust	truncatedsvd	svm_linear	0.00134256
156732736	0.00879993	0.378455	0.00297985	0.379798	0.00278717	{'classifier__C': 0.1, 'classifier__gamma': 'auto'}	1	robust	truncatedsvd	svm_linear	0.00134256
7289622855	0.00860016	0.378455	0.00297985	0.379648	0.00232757	{'classifier__C': 10, 'classifier__gamma': 'scale'}	1	robust	truncatedsvd	svm_linear	0.00119292
7519307788	0.00819991	0.378455	0.00297985	0.379648	0.00232757	{'classifier__C': 10, 'classifier__gamma': 'auto'}	1	robust	truncatedsvd	svm_linear	0.00119292
0.290745	0.0152989	0.38718	0.0221129	0.379499	0.0154518	{'classifier__C': 0.1, 'classifier__gamma': 'scale'}	1	yeo-johnson	random_projection	svm_sigmoid	-0.00768133
419758503	0.00900032	0.378455	0.00297985	0.379499	0.00219371	{'classifier__C': 1, 'classifier__gamma': 'scale'}	1	robust	truncatedsvd	svm_linear	0.00104328
423983338	0.00840011	0.378455	0.00297985	0.379499	0.00219371	{'classifier__C': 1, 'classifier__gamma': 'auto'}	1	robust	truncatedsvd	svm_linear	0.00104328
0.260099	0.0134009	0.37373	0.00824592	0.378976	0.00713857	{}	1	robust	modified_lle	lda	0.00524541
0.0296007	0.00420077	0.37442	0.00584105	0.378526	0.00267576	{'classifier__C': 0.1, 'classifier__penalty': 'l1', 'classifier__solver': 'liblinear'}	1	robust	ica	logistic_regression	0.00410625
0.0665954	0.0100989	0.378455	0.00297985	0.378451	0.000331089	{'classifier__C': 0.1, 'classifier__gamma': 'scale'}	1	robust	ica	svm_linear	-4.238e-06
0.077497	0.00960038	0.378455	0.00297985	0.378451	0.000331089	{'classifier__C': 0.1, 'classifier__gamma': 'auto'}	1	robust	ica	svm_linear	-4.238e-06
0.0319004	0.00360081	0.373739	0.0113609	0.378451	0.0037837	{'classifier__C': 0.1, 'classifier__penalty': 'l2', 'classifier__solver': 'liblinear'}	1	robust	pca	logistic_regression	0.00471127
0.3737	0.0191995	0.37778	0.00199041	0.378376	0.00148874	{'classifier__C': 10, 'classifier__gamma': 'auto'}	1	robust	modified_lle	svm_sigmoid	0.0005967
0.0331007	0.00389974	0.374415	0.0125583	0.378077	0.0042498	{'classifier__C': 0.1, 'classifier__penalty': 'l2', 'classifier__solver': 'liblinear'}	1	robust	truncatedsvd	logistic_regression	0.00366151
0.113997	0.0133994	0.377784	0.00272707	0.37688	0.000887789	{'classifier__C': 0.1, 'classifier__gamma': 'auto'}	1	maxabs	random_projection	svm_sigmoid	-0.000904393
0.689882	0.0267008	0.376433	0.0020013	0.376431	0.000221608	{'classifier__max_depth': None, 'classifier__min_samples_leaf': 1, 'classifier__min_samples_split': 2, 'classifier__n_estimators': 50}	1	standard	ltsa_lle	random_forest	-1.976e-06
2255533417	0.0096998	0.526524	0.0591455	0.530722	0.0588132	{'classifier__C': 0.1, 'classifier__gamma': 'scale'}	1	robust	nca	svm_linear	0.00419882
2236914455	0.0100995	0.526524	0.0591455	0.530722	0.0588132	{'classifier__C': 0.1, 'classifier__gamma': 'auto'}	1	robust	nca	svm_linear	0.00419882
4728548893	0.00830035	0.52451	0.0587946	0.531246	0.0582627	{'classifier__C': 1, 'classifier__gamma': 'scale'}	5	robust	nca	svm_linear	0.00673608
4628679408	0.00860004	0.52451	0.0587946	0.531246	0.0582627	{'classifier__C': 1, 'classifier__gamma': 'auto'}	5	robust	nca	svm_linear	0.00673608
8454184396	0.00761337	0.525857	0.0588012	0.531769	0.0570496	{'classifier__C': 10, 'classifier__gamma': 'scale'}	3	robust	nca	svm_linear	0.00591221
7641024021	0.00650034	0.525857	0.0588012	0.531769	0.0570496	{'classifier__C': 10, 'classifier__gamma': 'auto'}	3	robust	nca	svm_linear	0.00591221
2590391967	0.0424023	0.484763	0.0805813	0.488226	0.0797303	{'classifier__C': 0.1, 'classifier__gamma': 'scale'}	3	robust	nca	svm_rbf	0.00346277
2788175259	0.0539513	0.376433	0.0020013	0.376431	0.000221608	{'classifier__C': 0.1, 'classifier__gamma': 'auto'}	5	robust	nca	svm_rbf	-1.976e-06
2655818954	0.0342011	0.510335	0.0829902	0.529525	0.0886519	{'classifier__C': 1, 'classifier__gamma': 'scale'}	2	robust	nca	svm_rbf	0.0191905
2749554856	0.0232033	0.42554	0.0679759	0.431357	0.0634716	{'classifier__C': 0.1, 'classifier__gamma': 'scale'}	1	robust	nca	svm_sigmoid	0.00581749
2774134259	0.0185996	0.41954	0.0527639	0.400448	0.0357288	{'classifier__C': 0.1, 'classifier__gamma': 'auto'}	2	robust	nca	svm_sigmoid	-0.0190924
2705589774	0.023102	0.392577	0.0525425	0.402999	0.0545187	{'classifier__C': 1, 'classifier__gamma': 'scale'}	3	robust	nca	svm_sigmoid	0.0104222
2668711853	0.0181997	0.367613	0.0532987	0.376586	0.0388284	{'classifier__C': 1, 'classifier__gamma': 'auto'}	4	robust	nca	svm_sigmoid	0.00897333
2439376829	0.0173974	0.36291	0.0563254	0.374493	0.0544887	{'classifier__C': 10, 'classifier__gamma': 'scale'}	6	robust	nca	svm_sigmoid	0.0115827
1493594277	0.00811844	0.364248	0.0603067	0.371573	0.0451582	{'classifier__C': 10, 'classifier__gamma': 'auto'}	5	robust	nca	svm_sigmoid	0.00732504
2752569206	0.0173973	0.474066	0.0555662	0.479616	0.0453883	{'classifier__C': 0.1, 'classifier__penalty': 'l1', 'classifier__solver': 'liblinear'}	2	robust	nca	logistic_regression	0.00555013
2767876418	0.0101015	0.47003	0.0497111	0.478644	0.0434571	{'classifier__C': 0.1, 'classifier__penalty': 'l2', 'classifier__solver': 'liblinear'}	6	robust	nca	logistic_regression	0.00861372
2716111331	0.0109019	0.473381	0.0588694	0.483357	0.0497459	{'classifier__C': 1, 'classifier__penalty': 'l1', 'classifier__solver': 'liblinear'}	4	robust	nca	logistic_regression	0.00997627
2687829921	0.0101002	0.475399	0.058241	0.48231	0.0481954	{'classifier__C': 1, 'classifier__penalty': 'l2', 'classifier__solver': 'liblinear'}	1	robust	nca	logistic_regression	0.00691091
2416451113	0.0118033	0.473377	0.0602779	0.484106	0.0503075	{'classifier__C': 10, 'classifier__penalty': 'l1', 'classifier__solver': 'liblinear'}	5	robust	nca	logistic_regression	0.0107291
150859545	0.00419803	0.474052	0.059472	0.483208	0.0499365	{'classifier__C': 10, 'classifier__penalty': 'l2', 'classifier__solver': 'liblinear'}	3	robust	nca	logistic_regression	0.00915548
1041335404	0.00330012	0.509732	0.0628783	0.515906	0.0613266	{}	1	robust	nca	lda	0.00617451
1034148262	0.00389974	0.444277	0.128177	0.461518	0.122568	{}	1	robust	nca	gaussian_nb	0.0172411
2630202851	0.0242944	0.399333	0.0214008	0.407932	0.0339962	{'classifier__max_depth': None, 'classifier__min_samples_leaf': 5, 'classifier__min_samples_split': 2, 'classifier__n_estimators': 100}	37	robust	nca	extra_trees	0.008599
2719780469	0.0379968	0.39527	0.0184037	0.406739	0.0441556	{'classifier__max_depth': None, 'classifier__min_samples_leaf': 5, 'classifier__min_samples_split': 2, 'classifier__n_estimators': 200}	43	robust	nca	extra_trees	0.0114691
2698450568	0.0436	0.395275	0.0177617	0.406963	0.0402445	{'classifier__max_depth': None, 'classifier__min_samples_leaf': 5, 'classifier__min_samples_split': 2, 'classifier__n_estimators': 300}	42	robust	nca	extra_trees	0.0116877
2777051215	0.0755049	0.387861	0.0165739	0.400304	0.0328075	{'classifier__max_depth': None, 'classifier__min_samples_leaf': 5, 'classifier__min_samples_split': 2, 'classifier__n_estimators': 500}	66	robust	nca	extra_trees	0.012443
2634069691	0.0212987	0.398621	0.0294068	0.409659	0.0485773	{'classifier__max_depth': None, 'classifier__min_samples_leaf': 5, 'classifier__min_samples_split': 10, 'classifier__n_estimators': 100}	39	robust	nca	extra_trees	0.0110375
269163923	0.0347023	0.391221	0.0218834	0.40255	0.0417736	{'classifier__max_depth': None, 'classifier__min_samples_leaf': 5, 'classifier__min_samples_split': 10, 'classifier__n_estimators': 200}	59	robust	nca	extra_trees	0.0113293
2741992915	0.0445976	0.392581	0.016977	0.400828	0.0359129	{'classifier__max_depth': None, 'classifier__min_samples_leaf': 5, 'classifier__min_samples_split': 10, 'classifier__n_estimators': 300}	53	robust	nca	extra_trees	0.00824649
2739348147	0.0760036	0.395941	0.0251609	0.404569	0.0411488	{'classifier__max_depth': None, 'classifier__min_samples_leaf': 5, 'classifier__min_samples_split': 10, 'classifier__n_estimators': 500}	41	robust	nca	extra_trees	0.0086277
2651912522	0.0197004	0.399302	0.02117	0.404493	0.0299404	{'classifier__max_depth': None, 'classifier__min_samples_leaf': 5, 'classifier__min_samples_split': 20, 'classifier__n_estimators': 100}	38	robust	nca	extra_trees	0.00519161
2705195031	0.0427943	0.394617	0.0209403	0.405091	0.0398837	{'classifier__max_depth': None, 'classifier__min_samples_leaf': 5, 'classifier__min_samples_split': 20, 'classifier__n_estimators': 200}	44	robust	nca	extra_trees	0.0104736
2696438427	0.0431979	0.393248	0.0241097	0.402324	0.0432161	{'classifier__max_depth': None, 'classifier__min_samples_leaf': 5, 'classifier__min_samples_split': 20, 'classifier__n_estimators': 300}	51	robust	nca	extra_trees	0.00907656
2769840603	0.0698957	0.394595	0.0239415	0.402773	0.0412876	{'classifier__max_depth': None, 'classifier__min_samples_leaf': 5, 'classifier__min_samples_split': 20, 'classifier__n_estimators': 500}	46	robust	nca	extra_trees	0.00817867
2671826344	0.0190989	0.377775	0.00431577	0.378003	0.0047427	{'classifier__max_depth': None, 'classifier__min_samples_leaf': 10, 'classifier__min_samples_split': 2, 'classifier__n_estimators': 100}	93	robust	nca	extra_trees	0.000227599
2668791215	0.0318026	0.377775	0.00431577	0.379424	0.00604768	{'classifier__max_depth': None, 'classifier__min_samples_leaf': 10, 'classifier__min_samples_split': 2, 'classifier__n_estimators': 200}	93	robust	nca	extra_trees	0.0016488
2738716626	0.0464981	0.377775	0.00431577	0.379349	0.00566858	{'classifier__max_depth': None, 'classifier__min_samples_leaf': 10, 'classifier__min_samples_split': 2, 'classifier__n_estimators': 300}	93	robust	nca	extra_trees	0.00157395
2744031434	0.0638412	0.378446	0.00617235	0.3792	0.005641	{'classifier__max_depth': None, 'classifier__min_samples_leaf': 10, 'classifier__min_samples_split': 2, 'classifier__n_estimators': 500}	85	robust	nca	extra_trees	0.000753223
2665052133	0.0210016	0.379118	0.00544456	0.379799	0.00526344	{'classifier__max_depth': None, 'classifier__min_samples_leaf': 10, 'classifier__min_samples_split': 10, 'classifier__n_estimators': 100}	78	robust	nca	extra_trees	0.000681221
2701503882	0.0434032	0.377775	0.00431577	0.379499	0.00529428	{'classifier__max_depth': None, 'classifier__min_samples_leaf': 10, 'classifier__min_samples_split': 10, 'classifier__n_estimators': 200}	93	robust	nca	extra_trees	0.00172354
2720259624	0.0424064	0.379789	0.00687848	0.380023	0.00612777	{'classifier__max_depth': None, 'classifier__min_samples_leaf': 10, 'classifier__min_samples_split': 10, 'classifier__n_estimators': 300}	74	robust	nca	extra_trees	0.000234351
2744211733	0.0709946	0.378451	0.00485281	0.380696	0.00774756	{'classifier__max_depth': None, 'classifier__min_samples_leaf': 10, 'classifier__min_samples_split': 10, 'classifier__n_estimators': 500}	84	robust	nca	extra_trees	0.00224485
2635656216	0.0195006	0.379122	0.00574317	0.380846	0.00917199	{'classifier__max_depth': None, 'classifier__min_samples_leaf': 10, 'classifier__min_samples_split': 20, 'classifier__n_estimators': 100}	77	robust	nca	extra_trees	0.00172431
2713860857	0.0351048	0.377775	0.00431577	0.379349	0.00583035	{'classifier__max_depth': None, 'classifier__min_samples_leaf': 10, 'classifier__min_samples_split': 20, 'classifier__n_estimators': 200}	93	robust	nca	extra_trees	0.0015739
2727031515	0.0538805	0.378446	0.00617235	0.379574	0.00575879	{'classifier__max_depth': None, 'classifier__min_samples_leaf': 10, 'classifier__min_samples_split': 20, 'classifier__n_estimators': 300}	85	robust	nca	extra_trees	0.00112759
2757241678	0.0718843	0.377775	0.00431577	0.379499	0.00568414	{'classifier__max_depth': None, 'classifier__min_samples_leaf': 10, 'classifier__min_samples_split': 20, 'classifier__n_estimators': 500}	93	robust	nca	extra_trees	0.00172371
2632155101	0.0182016	0.391225	0.0145721	0.400079	0.0282665	{'classifier__max_depth': 10, 'classifier__min_samples_leaf': 5, 'classifier__min_samples_split': 2, 'classifier__n_estimators': 100}	58	robust	nca	extra_trees	0.00885326
2689842563	0.0357015	0.393923	0.0226484	0.400079	0.0367456	{'classifier__max_depth': 10, 'classifier__min_samples_leaf': 5, 'classifier__min_samples_split': 2, 'classifier__n_estimators': 200}	48	robust	nca	extra_trees	0.00615582
2733524585	0.0555933	0.385847	0.0127043	0.396561	0.0268632	{'classifier__max_depth': 10, 'classifier__min_samples_leaf': 5, 'classifier__min_samples_split': 2, 'classifier__n_estimators': 300}	72	robust	nca	extra_trees	0.010714
2749125996	0.068872	0.392595	0.0167764	0.401051	0.0320168	{'classifier__max_depth': 10, 'classifier__min_samples_leaf': 5, 'classifier__min_samples_split': 2, 'classifier__n_estimators': 500}	52	robust	nca	extra_trees	0.00845576
2649540591	0.0248985	0.387185	0.0145057	0.394392	0.0226222	{'classifier__max_depth': 10, 'classifier__min_samples_leaf': 5, 'classifier__min_samples_split': 10, 'classifier__n_estimators': 100}	69	robust	nca	extra_trees	0.00720682
270045048	0.0383198	0.389883	0.0194477	0.399631	0.0388164	{'classifier__max_depth': 10, 'classifier__min_samples_leaf': 5, 'classifier__min_samples_split': 10, 'classifier__n_estimators': 200}	63	robust	nca	extra_trees	0.00974784
2713890383	0.0465986	0.387176	0.0200425	0.398135	0.0388272	{'classifier__max_depth': 10, 'classifier__min_samples_leaf': 5, 'classifier__min_samples_split': 10, 'classifier__n_estimators': 300}	70	robust	nca	extra_trees	0.0109592
276161248	0.071884	0.390559	0.0149374	0.397609	0.0272339	{'classifier__max_depth': 10, 'classifier__min_samples_leaf': 5, 'classifier__min_samples_split': 10, 'classifier__n_estimators': 500}	60	robust	nca	extra_trees	0.00705048
2655707791	0.0211984	0.39055	0.0230482	0.400903	0.0414538	{'classifier__max_depth': 10, 'classifier__min_samples_leaf': 5, 'classifier__min_samples_split': 20, 'classifier__n_estimators': 100}	62	robust	nca	extra_trees	0.0103531
2704630482	0.0322945	0.387856	0.0180344	0.395814	0.0299196	{'classifier__max_depth': 10, 'classifier__min_samples_leaf': 5, 'classifier__min_samples_split': 20, 'classifier__n_estimators': 200}	67	robust	nca	extra_trees	0.007958
2731687942	0.0511012	0.387189	0.0143108	0.391772	0.0191291	{'classifier__max_depth': 10, 'classifier__min_samples_leaf': 5, 'classifier__min_samples_split': 20, 'classifier__n_estimators': 300}	68	robust	nca	extra_trees	0.00458309
2739612167	0.0654955	0.386514	0.0162976	0.395739	0.0306928	{'classifier__max_depth': 10, 'classifier__min_samples_leaf': 5, 'classifier__min_samples_split': 20, 'classifier__n_estimators': 500}	71	robust	nca	extra_trees	0.00922544
2643662324	0.0272015	0.377775	0.00310118	0.3792	0.00481726	{'classifier__max_depth': 10, 'classifier__min_samples_leaf': 10, 'classifier__min_samples_split': 2, 'classifier__n_estimators': 100}	93	robust	nca	extra_trees	0.00142481
2706870294	0.0358929	0.378446	0.00617235	0.380547	0.00846968	{'classifier__max_depth': 10, 'classifier__min_samples_leaf': 10, 'classifier__min_samples_split': 2, 'classifier__n_estimators': 200}	85	robust	nca	extra_trees	0.00210031
2720462401	0.0346013	0.379789	0.00687848	0.380397	0.00670333	{'classifier__max_depth': 10, 'classifier__min_samples_leaf': 10, 'classifier__min_samples_split': 2, 'classifier__n_estimators': 300}	74	robust	nca	extra_trees	0.00060849
2746082361	0.0662026	0.377775	0.00431577	0.379349	0.00610806	{'classifier__max_depth': 10, 'classifier__min_samples_leaf': 10, 'classifier__min_samples_split': 2, 'classifier__n_estimators': 500}	93	robust	nca	extra_trees	0.00157412
2665306265	0.0307983	0.379118	0.00544456	0.380697	0.00757262	{'classifier__max_depth': 10, 'classifier__min_samples_leaf': 10, 'classifier__min_samples_split': 10, 'classifier__n_estimators': 100}	78	robust	nca	extra_trees	0.00157909
2696569242	0.0339966	0.379118	0.00544456	0.379799	0.00623218	{'classifier__max_depth': 10, 'classifier__min_samples_leaf': 10, 'classifier__min_samples_split': 10, 'classifier__n_estimators': 200}	78	robust	nca	extra_trees	0.000681277
2707508748	0.0454031	0.377775	0.00431577	0.379424	0.00620131	{'classifier__max_depth': 10, 'classifier__min_samples_leaf': 10, 'classifier__min_samples_split': 10, 'classifier__n_estimators': 300}	93	robust	nca	extra_trees	0.00164891
2735205364	0.0672008	0.377775	0.00431577	0.3792	0.0055771	{'classifier__max_depth': 10, 'classifier__min_samples_leaf': 10, 'classifier__min_samples_split': 10, 'classifier__n_estimators': 500}	93	robust	nca	extra_trees	0.00142431
2677459803	0.0228009	0.377104	0.00269475	0.378975	0.00505527	{'classifier__max_depth': 10, 'classifier__min_samples_leaf': 10, 'classifier__min_samples_split': 20, 'classifier__n_estimators': 100}	108	robust	nca	extra_trees	0.00187084
2695637627	0.0472025	0.379118	0.00544456	0.380098	0.00626809	{'classifier__max_depth': 10, 'classifier__min_samples_leaf': 10, 'classifier__min_samples_split': 20, 'classifier__n_estimators': 200}	78	robust	nca	extra_trees	0.000980454
2730990987	0.0375995	0.378446	0.00617235	0.380846	0.00840164	{'classifier__max_depth': 10, 'classifier__min_samples_leaf': 10, 'classifier__min_samples_split': 20, 'classifier__n_estimators': 300}	85	robust	nca	extra_trees	0.00239959
2741573431	0.072101	0.379118	0.00544456	0.379873	0.00561669	{'classifier__max_depth': 10, 'classifier__min_samples_leaf': 10, 'classifier__min_samples_split': 20, 'classifier__n_estimators': 500}	78	robust	nca	extra_trees	0.000755679
2644279153	0.0236004	0.396608	0.0296034	0.403073	0.0432495	{'classifier__max_depth': 20, 'classifier__min_samples_leaf': 5, 'classifier__min_samples_split': 2, 'classifier__n_estimators': 100}	40	robust	nca	extra_trees	0.00646544
267991926	0.0333066	0.391248	0.0166239	0.40075	0.0310994	{'classifier__max_depth': 20, 'classifier__min_samples_leaf': 5, 'classifier__min_samples_split': 2, 'classifier__n_estimators': 200}	57	robust	nca	extra_trees	0.00950234
2715118041	0.0571964	0.388527	0.0158185	0.399032	0.0355474	{'classifier__max_depth': 20, 'classifier__min_samples_leaf': 5, 'classifier__min_samples_split': 2, 'classifier__n_estimators': 300}	65	robust	nca	extra_trees	0.0105048
2756332524	0.0799296	0.393923	0.021816	0.404644	0.044317	{'classifier__max_depth': 20, 'classifier__min_samples_leaf': 5, 'classifier__min_samples_split': 2, 'classifier__n_estimators': 500}	50	robust	nca	extra_trees	0.0107202
2674032636	0.0236037	0.392563	0.01885	0.401353	0.0369663	{'classifier__max_depth': 20, 'classifier__min_samples_leaf': 5, 'classifier__min_samples_split': 10, 'classifier__n_estimators': 100}	54	robust	nca	extra_trees	0.00878948
2671364267	0.0338019	0.394604	0.0197652	0.403521	0.037522	{'classifier__max_depth': 20, 'classifier__min_samples_leaf': 5, 'classifier__min_samples_split': 10, 'classifier__n_estimators': 200}	45	robust	nca	extra_trees	0.00891749
2729356453	0.0475966	0.393928	0.0225091	0.404793	0.0429804	{'classifier__max_depth': 20, 'classifier__min_samples_leaf': 5, 'classifier__min_samples_split': 10, 'classifier__n_estimators': 300}	47	robust	nca	extra_trees	0.0108649
2758022385	0.0839034	0.391901	0.0190065	0.403223	0.0418137	{'classifier__max_depth': 20, 'classifier__min_samples_leaf': 5, 'classifier__min_samples_split': 10, 'classifier__n_estimators': 500}	56	robust	nca	extra_trees	0.0113216
2643171389	0.0248025	0.389869	0.0218057	0.396787	0.0306926	{'classifier__max_depth': 20, 'classifier__min_samples_leaf': 5, 'classifier__min_samples_split': 20, 'classifier__n_estimators': 100}	64	robust	nca	extra_trees	0.00691758
2708139365	0.036806	0.390559	0.0181997	0.401427	0.0424363	{'classifier__max_depth': 20, 'classifier__min_samples_leaf': 5, 'classifier__min_samples_split': 20, 'classifier__n_estimators': 200}	60	robust	nca	extra_trees	0.010868
2729772477	0.0476997	0.39191	0.0201508	0.402697	0.038679	{'classifier__max_depth': 20, 'classifier__min_samples_leaf': 5, 'classifier__min_samples_split': 20, 'classifier__n_estimators': 300}	55	robust	nca	extra_trees	0.0107869
2736817987	0.0598012	0.393923	0.0213934	0.402174	0.0390227	{'classifier__max_depth': 20, 'classifier__min_samples_leaf': 5, 'classifier__min_samples_split': 20, 'classifier__n_estimators': 500}	48	robust	nca	extra_trees	0.00825084
2665358438	0.0190035	0.379118	0.00810417	0.380098	0.0072249	{'classifier__max_depth': 20, 'classifier__min_samples_leaf': 10, 'classifier__min_samples_split': 2, 'classifier__n_estimators': 100}	78	robust	nca	extra_trees	0.000980342
2697436874	0.0327527	0.377775	0.00431577	0.379125	0.00553528	{'classifier__max_depth': 20, 'classifier__min_samples_leaf': 10, 'classifier__min_samples_split': 2, 'classifier__n_estimators': 200}	93	robust	nca	extra_trees	0.00134957
2727139375	0.0465068	0.377775	0.00431577	0.379723	0.00587243	{'classifier__max_depth': 20, 'classifier__min_samples_leaf': 10, 'classifier__min_samples_split': 2, 'classifier__n_estimators': 300}	93	robust	nca	extra_trees	0.00194804
2759822562	0.0720962	0.377775	0.00431577	0.3792	0.005641	{'classifier__max_depth': 20, 'classifier__min_samples_leaf': 10, 'classifier__min_samples_split': 2, 'classifier__n_estimators': 500}	93	robust	nca	extra_trees	0.00142436
265316628	0.0262968	0.379793	0.00646233	0.380172	0.00655532	{'classifier__max_depth': 20, 'classifier__min_samples_leaf': 10, 'classifier__min_samples_split': 10, 'classifier__n_estimators': 100}	73	robust	nca	extra_trees	0.000379236
2688066409	0.035901	0.377775	0.00431577	0.3792	0.005641	{'classifier__max_depth': 20, 'classifier__min_samples_leaf': 10, 'classifier__min_samples_split': 10, 'classifier__n_estimators': 200}	93	robust	nca	extra_trees	0.00142436
2733144457	0.0377061	0.378446	0.00617235	0.379574	0.00634233	{'classifier__max_depth': 20, 'classifier__min_samples_leaf': 10, 'classifier__min_samples_split': 10, 'classifier__n_estimators': 300}	85	robust	nca	extra_trees	0.00112731
2747994647	0.0696504	0.378446	0.00617235	0.379424	0.00611583	{'classifier__max_depth': 20, 'classifier__min_samples_leaf': 10, 'classifier__min_samples_split': 10, 'classifier__n_estimators': 500}	85	robust	nca	extra_trees	0.000977718
2653792524	0.0222917	0.378446	0.00448115	0.379798	0.00612583	{'classifier__max_depth': 20, 'classifier__min_samples_leaf': 10, 'classifier__min_samples_split': 20, 'classifier__n_estimators': 100}	85	robust	nca	extra_trees	0.00135203
2671572258	0.0336105	0.379789	0.00687848	0.38107	0.00783017	{'classifier__max_depth': 20, 'classifier__min_samples_leaf': 10, 'classifier__min_samples_split': 20, 'classifier__n_estimators': 200}	74	robust	nca	extra_trees	0.00128181
2483398156	0.0327614	0.378446	0.00448115	0.379274	0.00443361	{'classifier__max_depth': 20, 'classifier__min_samples_leaf': 10, 'classifier__min_samples_split': 20, 'classifier__n_estimators': 300}	85	robust	nca	extra_trees	0.000828018
1823376524	0.024898	0.377775	0.00431577	0.379723	0.00596896	{'classifier__max_depth': 20, 'classifier__min_samples_leaf': 10, 'classifier__min_samples_split': 20, 'classifier__n_estimators': 500}	93	robust	nca	extra_trees	0.0019482
2840438516	0.00860362	0.508367	0.0446115	0.537381	0.0444706	{'classifier__alpha': 0.0001, 'classifier__hidden_layer_sizes': (100,)}	5	robust	nca	mlp	0.0290139
2759530258	0.00999653	0.513033	0.0412633	0.539853	0.0527512	{'classifier__alpha': 0.0001, 'classifier__hidden_layer_sizes': (50, 50)}	2	robust	nca	mlp	0.0268202
2739529183	0.00969996	0.511722	0.0477184	0.535659	0.0540131	{'classifier__alpha': 0.001, 'classifier__hidden_layer_sizes': (50,)}	3	robust	nca	mlp	0.0239367
2704560723	0.00779917	0.505632	0.0602223	0.53506	0.0540878	{'classifier__alpha': 0.01, 'classifier__hidden_layer_sizes': (50,)}	6	robust	nca	mlp	0.0294277
0.0406996	0.0094007	0.439044	0.0148216	0.446465	0.00513615	{'classifier__C': 0.1, 'classifier__gamma': 'scale'}	5	maxabs	pca	svm_linear	0.00742105
0.0550989	0.0100998	0.439044	0.0148216	0.446465	0.00513615	{'classifier__C': 0.1, 'classifier__gamma': 'auto'}	5	maxabs	pca	svm_linear	0.00742105
0.0463003	0.00910044	0.487616	0.0349555	0.486795	0.00330968	{'classifier__C': 1, 'classifier__gamma': 'scale'}	3	maxabs	pca	svm_linear	-0.000820976
0.0436994	0.00880034	0.487616	0.0349555	0.486795	0.00330968	{'classifier__C': 1, 'classifier__gamma': 'auto'}	3	maxabs	pca	svm_linear	-0.000820976
0.0501914	0.00910358	0.490287	0.0335542	0.489488	0.0035663	{'classifier__C': 10, 'classifier__gamma': 'scale'}	1	maxabs	pca	svm_linear	-0.000798779
0.0499737	0.00760004	0.490287	0.0335542	0.489488	0.0035663	{'classifier__C': 10, 'classifier__gamma': 'auto'}	1	maxabs	pca	svm_linear	-0.000798779
0.0723984	0.0252017	0.486913	0.0351577	0.488815	0.00354962	{'classifier__C': 0.1, 'classifier__gamma': 'scale'}	5	maxabs	pca	svm_rbf	0.00190186
0.0883981	0.0249009	0.430963	0.007675	0.434344	0.00432078	{'classifier__C': 0.1, 'classifier__gamma': 'auto'}	6	maxabs	pca	svm_rbf	0.00338074
0.0809999	0.0250991	0.500372	0.0296416	0.512832	0.00354284	{'classifier__C': 1, 'classifier__gamma': 'scale'}	1	maxabs	pca	svm_rbf	0.0124603
0.0716997	0.0247998	0.488926	0.0338067	0.490985	0.0041864	{'classifier__C': 1, 'classifier__gamma': 'auto'}	4	maxabs	pca	svm_rbf	0.00205865
0.114525	0.0242	0.499039	0.0366918	0.521362	0.00316832	{'classifier__C': 10, 'classifier__gamma': 'scale'}	2	maxabs	pca	svm_rbf	0.0223233
0.0837995	0.0220991	0.499039	0.0337667	0.508641	0.00427251	{'classifier__C': 10, 'classifier__gamma': 'auto'}	2	maxabs	pca	svm_rbf	0.00960274
0.0788985	0.0124001	0.453909	0.0254705	0.453124	0.00370837	{'classifier__C': 0.1, 'classifier__gamma': 'scale'}	3	maxabs	pca	svm_sigmoid	-0.00078488
0.0919996	0.012099	0.388559	0.00972999	0.386981	0.00288451	{'classifier__C': 0.1, 'classifier__gamma': 'auto'}	5	maxabs	pca	svm_sigmoid	-0.00157755
0.0738988	0.0116002	0.400726	0.0347051	0.39798	0.00801666	{'classifier__C': 1, 'classifier__gamma': 'scale'}	4	maxabs	pca	svm_sigmoid	-0.00274523
0.0778981	0.0114011	0.484913	0.0295835	0.483278	0.00500528	{'classifier__C': 1, 'classifier__gamma': 'auto'}	1	maxabs	pca	svm_sigmoid	-0.00163495
0.0646998	0.0106151	0.371055	0.0274633	0.369623	0.00854131	{'classifier__C': 10, 'classifier__gamma': 'scale'}	6	maxabs	pca	svm_sigmoid	-0.00143157
0.0539989	0.00780082	0.468751	0.041069	0.472279	0.0025682	{'classifier__C': 10, 'classifier__gamma': 'auto'}	2	maxabs	pca	svm_sigmoid	0.00352761
0.0165998	0.00350108	0.439076	0.0221678	0.440255	0.00193176	{'classifier__C': 0.1, 'classifier__penalty': 'l1', 'classifier__solver': 'liblinear'}	5	maxabs	pca	logistic_regression	0.00117875
0.0170998	0.00369973	0.431004	0.0157682	0.431276	0.00165911	{'classifier__C': 0.1, 'classifier__penalty': 'l2', 'classifier__solver': 'liblinear'}	6	maxabs	pca	logistic_regression	0.000272069
0.0241025	0.00410037	0.453211	0.0228991	0.453199	0.00399824	{'classifier__C': 1, 'classifier__penalty': 'l1', 'classifier__solver': 'liblinear'}	3	maxabs	pca	logistic_regression	-1.1568e-05
0.0204996	0.00410023	0.447823	0.0246641	0.446839	0.00216773	{'classifier__C': 1, 'classifier__penalty': 'l2', 'classifier__solver': 'liblinear'}	4	maxabs	pca	logistic_regression	-0.000984395
0.0302006	0.00410039	0.454571	0.0250993	0.454022	0.0036994	{'classifier__C': 10, 'classifier__penalty': 'l1', 'classifier__solver': 'liblinear'}	1	maxabs	pca	logistic_regression	-0.00054886
0.0206997	0.00350063	0.45322	0.0230842	0.453797	0.00401044	{'classifier__C': 10, 'classifier__penalty': 'l2', 'classifier__solver': 'liblinear'}	2	maxabs	pca	logistic_regression	0.000577772
0.0105983	0.00330064	0.479485	0.0308944	0.48425	0.00408968	{}	1	maxabs	pca	lda	0.00476562
0.0101995	0.00360127	0.480156	0.0369498	0.493454	0.00314298	{}	1	maxabs	pca	gaussian_nb	0.0132975
0.1706	0.0136997	0.395932	0.0128569	0.401352	0.0180445	{'classifier__max_depth': None, 'classifier__min_samples_leaf': 10, 'classifier__min_samples_split': 2, 'classifier__n_estimators': 100}	83	maxabs	pca	extra_trees	0.0054195
0.3122	0.0222001	0.390572	0.00660739	0.395736	0.00422264	{'classifier__max_depth': None, 'classifier__min_samples_leaf': 10, 'classifier__min_samples_split': 2, 'classifier__n_estimators': 200}	107	maxabs	pca	extra_trees	0.00516326
0.469311	0.0296829	0.395261	0.0111306	0.400901	0.0112821	{'classifier__max_depth': None, 'classifier__min_samples_leaf': 10, 'classifier__min_samples_split': 2, 'classifier__n_estimators': 300}	86	maxabs	pca	extra_trees	0.00564003
0.764686	0.0467	0.39191	0.00504911	0.393941	0.00557024	{'classifier__max_depth': None, 'classifier__min_samples_leaf': 10, 'classifier__min_samples_split': 2, 'classifier__n_estimators': 500}	104	maxabs	pca	extra_trees	0.00203079
0.171756	0.0136991	0.392604	0.0120098	0.39753	0.00937327	{'classifier__max_depth': None, 'classifier__min_samples_leaf': 10, 'classifier__min_samples_split': 10, 'classifier__n_estimators': 100}	101	maxabs	pca	extra_trees	0.00492649
0.3148	0.0218002	0.393248	0.0106222	0.399928	0.00985743	{'classifier__max_depth': None, 'classifier__min_samples_leaf': 10, 'classifier__min_samples_split': 10, 'classifier__n_estimators': 200}	100	maxabs	pca	extra_trees	0.00668
0.459803	0.0294172	0.392581	0.00946263	0.39641	0.00843555	{'classifier__max_depth': None, 'classifier__min_samples_leaf': 10, 'classifier__min_samples_split': 10, 'classifier__n_estimators': 300}	103	maxabs	pca	extra_trees	0.00382842
0.775029	0.0454003	0.393923	0.00777463	0.397159	0.00846758	{'classifier__max_depth': None, 'classifier__min_samples_leaf': 10, 'classifier__min_samples_split': 10, 'classifier__n_estimators': 500}	95	maxabs	pca	extra_trees	0.0032352
0.165369	0.0131001	0.399324	0.00981398	0.405688	0.0102575	{'classifier__max_depth': None, 'classifier__min_samples_leaf': 10, 'classifier__min_samples_split': 20, 'classifier__n_estimators': 100}	74	maxabs	pca	extra_trees	0.00636357
0.314657	0.0213001	0.39191	0.00787506	0.395287	0.00725479	{'classifier__max_depth': None, 'classifier__min_samples_leaf': 10, 'classifier__min_samples_split': 20, 'classifier__n_estimators': 200}	105	maxabs	pca	extra_trees	0.00337731
0.469363	0.0312999	0.390572	0.00726556	0.395287	0.00636001	{'classifier__max_depth': None, 'classifier__min_samples_leaf': 10, 'classifier__min_samples_split': 20, 'classifier__n_estimators': 300}	107	maxabs	pca	extra_trees	0.00471467
0.7634	0.0463003	0.393257	0.00809758	0.394988	0.00555456	{'classifier__max_depth': None, 'classifier__min_samples_leaf': 10, 'classifier__min_samples_split': 20, 'classifier__n_estimators': 500}	98	maxabs	pca	extra_trees	0.00173109
0.1762	0.0137	0.393928	0.00801637	0.399926	0.00782071	{'classifier__max_depth': 10, 'classifier__min_samples_leaf': 10, 'classifier__min_samples_split': 2, 'classifier__n_estimators': 100}	92	maxabs	pca	extra_trees	0.0059985
0.3089	0.0207997	0.39259	0.00650336	0.397009	0.00732431	{'classifier__max_depth': 10, 'classifier__min_samples_leaf': 10, 'classifier__min_samples_split': 2, 'classifier__n_estimators': 200}	102	maxabs	pca	extra_trees	0.00441855
0.460671	0.0293999	0.395279	0.00690508	0.397532	0.00619285	{'classifier__max_depth': 10, 'classifier__min_samples_leaf': 10, 'classifier__min_samples_split': 2, 'classifier__n_estimators': 300}	84	maxabs	pca	extra_trees	0.00225273
0.76392	0.0475002	0.395946	0.00873961	0.399328	0.00671987	{'classifier__max_depth': 10, 'classifier__min_samples_leaf': 10, 'classifier__min_samples_split': 2, 'classifier__n_estimators': 500}	81	maxabs	pca	extra_trees	0.00338225
0.164401	0.0135998	0.39664	0.0120097	0.401121	0.0131216	{'classifier__max_depth': 10, 'classifier__min_samples_leaf': 10, 'classifier__min_samples_split': 10, 'classifier__n_estimators': 100}	77	maxabs	pca	extra_trees	0.0044812
0.311299	0.0219998	0.393923	0.0107231	0.399029	0.00862047	{'classifier__max_depth': 10, 'classifier__min_samples_leaf': 10, 'classifier__min_samples_split': 10, 'classifier__n_estimators': 200}	93	maxabs	pca	extra_trees	0.00510523
0.465999	0.0302005	0.391239	0.00577463	0.39611	0.00561358	{'classifier__max_depth': 10, 'classifier__min_samples_leaf': 10, 'classifier__min_samples_split': 10, 'classifier__n_estimators': 300}	106	maxabs	pca	extra_trees	0.00487153
0.765157	0.0454	0.393257	0.00809004	0.397981	0.00658337	{'classifier__max_depth': 10, 'classifier__min_samples_leaf': 10, 'classifier__min_samples_split': 10, 'classifier__n_estimators': 500}	97	maxabs	pca	extra_trees	0.00472432
0.1648	0.0132999	0.398644	0.00724697	0.400151	0.00640619	{'classifier__max_depth': 10, 'classifier__min_samples_leaf': 10, 'classifier__min_samples_split': 20, 'classifier__n_estimators': 100}	75	maxabs	pca	extra_trees	0.00150693
0.310357	0.0206003	0.395955	0.00964299	0.397681	0.00773958	{'classifier__max_depth': 10, 'classifier__min_samples_leaf': 10, 'classifier__min_samples_split': 20, 'classifier__n_estimators': 200}	79	maxabs	pca	extra_trees	0.00172608
0.469962	0.0292999	0.393257	0.00749639	0.397906	0.00858189	{'classifier__max_depth': 10, 'classifier__min_samples_leaf': 10, 'classifier__min_samples_split': 20, 'classifier__n_estimators': 300}	98	maxabs	pca	extra_trees	0.00464908
0.7617	0.0437002	0.395279	0.00621864	0.399477	0.0060003	{'classifier__max_depth': 10, 'classifier__min_samples_leaf': 10, 'classifier__min_samples_split': 20, 'classifier__n_estimators': 500}	84	maxabs	pca	extra_trees	0.00419805
0.1652	0.0148001	0.394608	0.00713617	0.401347	0.00841227	{'classifier__max_depth': 20, 'classifier__min_samples_leaf': 10, 'classifier__min_samples_split': 2, 'classifier__n_estimators': 100}	87	maxabs	pca	extra_trees	0.00673916
0.3248	0.0224998	0.395941	0.0108736	0.400302	0.0100842	{'classifier__max_depth': 20, 'classifier__min_samples_leaf': 10, 'classifier__min_samples_split': 2, 'classifier__n_estimators': 200}	82	maxabs	pca	extra_trees	0.00436073
0.480801	0.029499	0.393937	0.0072734	0.394912	0.00502931	{'classifier__max_depth': 20, 'classifier__min_samples_leaf': 10, 'classifier__min_samples_split': 2, 'classifier__n_estimators': 300}	90	maxabs	pca	extra_trees	0.000974913
0.782878	0.0468995	0.393937	0.00591669	0.395735	0.00506298	{'classifier__max_depth': 20, 'classifier__min_samples_leaf': 10, 'classifier__min_samples_split': 2, 'classifier__n_estimators': 500}	90	maxabs	pca	extra_trees	0.00179788
0.1818	0.0134003	0.395955	0.0113641	0.400375	0.0125006	{'classifier__max_depth': 20, 'classifier__min_samples_leaf': 10, 'classifier__min_samples_split': 10, 'classifier__n_estimators': 100}	79	maxabs	pca	extra_trees	0.00442013
0.314059	0.0214997	0.393919	0.0109681	0.397607	0.00881062	{'classifier__max_depth': 20, 'classifier__min_samples_leaf': 10, 'classifier__min_samples_split': 10, 'classifier__n_estimators': 200}	96	maxabs	pca	extra_trees	0.00368845
0.482471	0.0297005	0.399333	0.00766066	0.40232	0.00919503	{'classifier__max_depth': 20, 'classifier__min_samples_leaf': 10, 'classifier__min_samples_split': 10, 'classifier__n_estimators': 300}	73	maxabs	pca	extra_trees	0.00298629
0.7835	0.0442005	0.393923	0.00716339	0.398056	0.00524759	{'classifier__max_depth': 20, 'classifier__min_samples_leaf': 10, 'classifier__min_samples_split': 10, 'classifier__n_estimators': 500}	93	maxabs	pca	extra_trees	0.00413301
0.1755	0.0134002	0.396608	0.0116805	0.39671	0.00967412	{'classifier__max_depth': 20, 'classifier__min_samples_leaf': 10, 'classifier__min_samples_split': 20, 'classifier__n_estimators': 100}	78	maxabs	pca	extra_trees	0.000101761
0.312	0.0212993	0.394599	0.00842253	0.396784	0.00718507	{'classifier__max_depth': 20, 'classifier__min_samples_leaf': 10, 'classifier__min_samples_split': 20, 'classifier__n_estimators': 200}	89	maxabs	pca	extra_trees	0.00218494
0.4335	0.0230998	0.397964	0.00895046	0.40307	0.00980473	{'classifier__max_depth': 20, 'classifier__min_samples_leaf': 10, 'classifier__min_samples_split': 20, 'classifier__n_estimators': 300}	76	maxabs	pca	extra_trees	0.00510653
0.588501	0.0256999	0.394604	0.00686394	0.399253	0.00697238	{'classifier__max_depth': 20, 'classifier__min_samples_leaf': 10, 'classifier__min_samples_split': 20, 'classifier__n_estimators': 500}	88	maxabs	pca	extra_trees	0.00464895
3930388021	0.00520143	0.503737	0.0219777	0.52039	0.00602051	{'classifier__alpha': 0.0001, 'classifier__hidden_layer_sizes': (50,)}	3	maxabs	pca	mlp	0.0166532
4918286538	0.00540016	0.501705	0.0216028	0.523008	0.00601591	{'classifier__alpha': 0.0001, 'classifier__hidden_layer_sizes': (100,)}	6	maxabs	pca	mlp	0.0213034
3818697619	0.00545607	0.501691	0.0296871	0.525628	0.00699144	{'classifier__alpha': 0.0001, 'classifier__hidden_layer_sizes': (50, 50)}	8	maxabs	pca	mlp	0.0239367
0.835742	0.0341003	0.376433	0.0020013	0.376431	0.000221608	{'classifier__max_depth': None, 'classifier__min_samples_leaf': 1, 'classifier__min_samples_split': 2, 'classifier__n_estimators': 100}	1	standard	ltsa_lle	random_forest	-1.976e-06
4532712841	0.0055001	0.502381	0.0240326	0.523233	0.00428975	{'classifier__alpha': 0.001, 'classifier__hidden_layer_sizes': (100,)}	5	maxabs	pca	mlp	0.0208521
3862781096	0.00569971	0.50507	0.0231105	0.524206	0.00657783	{'classifier__alpha': 0.001, 'classifier__hidden_layer_sizes': (50, 50)}	2	maxabs	pca	mlp	0.0191363
3579690456	0.00569959	0.501696	0.018937	0.517397	0.00470513	{'classifier__alpha': 0.01, 'classifier__hidden_layer_sizes': (50,)}	7	maxabs	pca	mlp	0.0157015
3753058791	0.00369983	0.502385	0.0269739	0.521363	0.00436319	{'classifier__alpha': 0.01, 'classifier__hidden_layer_sizes': (100,)}	4	maxabs	pca	mlp	0.0189774
[truncated: 4,935 more rows]
