# Supplementary material for: Synthetic Data Generation for Classifying Electrophysiological and Morpho- Electrophysiological Neurons from Mouse Visual Cortex
Source: Research Square preprint supplement (doi:10.21203/rs.3.rs-7545694/v1), 2025-09-17
Supplement: Supplementary file 6 [file b479a86b23ed3f5194591fc4.xlsx]

## Sheet: Feuil1
file	classifier	mean_test_accuracy	test_std	test_ci_low	test_ci_high	weighted_precision	prec_std	prec_ci_low	prec_ci_high	brier_score
mee-type_vae_quantileUni_lda_5.csv	mlp_50_lr0.001	0.0703296703296703	0.0530440368621853	0.0044667994385012	0.1361925412208393	0.0739495028780743	0.1374608657093669	-0.0967307052351692	0.2446297109913178	0.0698318454909625
mee-type_vae_quantileUni_lda_5.csv	mlp_100_lr0.001	0.0835164835164835	0.08245420431782	-0.0188639334854912	0.1858969005184582	0.0752485609628466	0.1390216035453692	-0.0973695591319954	0.2478666810576888	0.0741628170130263
mee-type_vae_quantileUni_lda_5.csv	mlp_50x2_lr0.001	0.0703296703296703	0.0501176011032588	0.0081004493634164	0.1325588912959241	0.0973231896308819	0.1244449654101508	-0.0571956436766153	0.2518420229383792	0.0865062581084923
mee-type_vae_quantileUni_lda_5.csv	mlp_128_64	0.0461538461538461	0.0350960866432336	0.0025762988911028	0.0897313934165894	0.0515262515262515	0.0969039678622531	-0.068795916651403	0.171848419703906	0.0997151585438138
mee-type_vae_quantileUni_lda_5.csv	mlp_128_64_es	0.0395604395604395	0.0335119795208283	-0.0020501789191149	0.081171058039994	0.0097815447678085	0.0078753525344567	3.003052610767859e-06	0.0195600864830062	0.0603958798509583
mee-type_vae_quantileUni_lda_5.csv	mlp_128_64_alpha	0.0395604395604395	0.0060189292033534	0.0320869518608982	0.0470339272599808	0.0125902668759811	0.0049023849907144	0.0065031519276765	0.0186773818242857	0.1017613997481708
mee-type_vae_quantileUni_lda_5.csv	mlp_50_lr0.001	0.0703296703296703	0.0530440368621853	0.0044667994385012	0.1361925412208393	0.0739495028780743	0.1374608657093669	-0.0967307052351692	0.2446297109913178	0.0698318454909625
mee-type_vae_quantileUni_lda_5.csv	mlp_100_lr0.001	0.0835164835164835	0.08245420431782	-0.0188639334854912	0.1858969005184582	0.0752485609628466	0.1390216035453692	-0.0973695591319954	0.2478666810576888	0.0741628170130263
mee-type_vae_quantileUni_lda_5.csv	mlp_50x2_lr0.001	0.0703296703296703	0.0501176011032588	0.0081004493634164	0.1325588912959241	0.0973231896308819	0.1244449654101508	-0.0571956436766153	0.2518420229383792	0.0865062581084923
mee-type_vae_quantileUni_lda_5.csv	mlp_128_64	0.0461538461538461	0.0350960866432336	0.0025762988911028	0.0897313934165894	0.0515262515262515	0.0969039678622531	-0.068795916651403	0.171848419703906	0.0997151585438138
mee-type_vae_quantileUni_lda_5.csv	mlp_128_64_es	0.0395604395604395	0.0335119795208283	-0.0020501789191149	0.081171058039994	0.0097815447678085	0.0078753525344567	3.003052610767859e-06	0.0195600864830062	0.0603958798509583
mee-type_vae_quantileUni_lda_5.csv	mlp_128_64_alpha	0.0395604395604395	0.0060189292033534	0.0320869518608982	0.0470339272599808	0.0125902668759811	0.0049023849907144	0.0065031519276765	0.0186773818242857	0.1017613997481708
mee-type_vae_quantileUni_lda_5.csv	logistic_l2_1	0.0593406593406593	0.0240757168134138	0.0294467085424941	0.0892346101388244	0.0220551378446115	0.0151971583034579	0.0031853735042043	0.0409249021850187	0.0906488139188294
mee-type_vae_quantileUni_lda_5.csv	logistic_l2_2	0.0483516483516483	0.0098288702307683	0.0361474940430866	0.0605558026602101	0.0134615384615384	0.0055287395048071	0.0065967016629724	0.0203263752601044	0.0622956718370545
mee-type_vae_quantileUni_lda_5.csv	logistic_l2_3	0.0351648351648351	0.0180567876100604	0.0127443720662113	0.057585298263459	0.0129211447892766	0.0116664703400589	-0.0015646914180865	0.0274069809966398	0.1006051364862696
mee-type_vae_quantileUni_lda_5.csv	logistic_l1_1	0.0571428571428571	0.0294866106923049	0.0205303942171719	0.0937553200685424	0.0169230769230769	0.0132689748115372	0.0004474686065185	0.0333986852396352	0.096206224082375
mee-type_vae_quantileUni_lda_5.csv	logistic_l1_2	0.0527472527472527	0.0091940662256491	0.0413313117177629	0.0641631937767425	0.0433096315449256	0.0300946460167673	0.0059421930472192	0.080677070042632	0.0576393045815064
mee-type_vae_quantileUni_lda_5.csv	logistic_l1_3	0.0307692307692307	0.0238236081194272	0.001188314260023	0.0603501472784385	0.0102000563539025	0.009876815241049	-0.0020636295478184	0.0224637422556234	0.1027909594444637
mee-type_vae_quantileUni_lda_5.csv	logistic_l2_balanced_1	0.0593406593406593	0.0240757168134138	0.0294467085424941	0.0892346101388244	0.0220551378446115	0.0151971583034579	0.0031853735042043	0.0409249021850187	0.0906472700086966
mee-type_vae_quantileUni_lda_5.csv	logistic_l1_balanced_1	0.0571428571428571	0.0294866106923049	0.0205303942171719	0.0937553200685424	0.0169230769230769	0.0132689748115372	0.0004474686065185	0.0333986852396352	0.0962059376378784
mee-type_vae_quantileUni_lda_5.csv	rf_100_10	0.0945054945054945	0.0240757168134138	0.0646115437073293	0.1243994453036596	0.0167048900179681	0.0059288916330838	0.0093431987279163	0.0240665813080198	0.0743534827850065
mee-type_vae_quantileUni_lda_5.csv	rf_100_20	0.0945054945054945	0.0240757168134138	0.0646115437073293	0.1243994453036596	0.0162694121831094	0.005830943699977	0.0090293393152948	0.023509485050924	0.0740181512605041
mee-type_vae_quantileUni_lda_5.csv	rf_200_10	0.1032967032967033	0.0240757168134138	0.0734027524985381	0.1331906540948684	0.0193602169337903	0.0064791144495783	0.0113153337815071	0.0274051000860735	0.0738564623772586
mee-type_vae_quantileUni_lda_5.csv	rf_200_20	0.0945054945054945	0.0240757168134138	0.0646115437073293	0.1243994453036596	0.0166688731898149	0.0054716379418798	0.009874937346177	0.0234628090334529	0.0720286231415643
mee-type_vae_quantileUni_lda_5.csv	rf_bal_100_10	0.0857142857142857	0.0196577404615366	0.0613059770971622	0.1101225943314092	0.0142483960667527	0.0047379838089245	0.0083654121471387	0.0201313799863666	0.0736183199813258
mee-type_vae_quantileUni_lda_5.csv	rf_bal_200_20	0.0945054945054945	0.0240757168134138	0.0646115437073293	0.1243994453036596	0.0163749794936457	0.0068625787212494	0.0078539625606309	0.0248959964266604	0.0808232449903038
mee-type_vae_quantileUni_lda_5.csv	decision_tree	0.0505494505494505	0.0240757168134138	0.0206554997512854	0.0804434013476156	0.0062919993281421	0.0055951828997431	-0.0006553378418342	0.0132393364981186	0.1117000646412411
mee-type_vae_quantileUni_lda_5.csv	decision_tree_bal	0.0725274725274725	0.0450415418283938	0.0166010116155668	0.1284539334393782	0.0169443979823587	0.0210995596887372	-0.0092541656610978	0.0431429616258152	0.1091144149967679
mee-type_vae_quantileUni_lda_5.csv	extra_tree	0.0593406593406593	0.0240757168134138	0.0294467085424941	0.0892346101388244	0.0088777757615812	0.0061416138613622	0.0012519549390585	0.0165035965841039	0.078910639948287
mee-type_vae_quantileUni_lda_5.csv	extra_tree_bal	0.0505494505494505	0.0240757168134138	0.0206554997512854	0.0804434013476156	0.0066275339567265	0.0061310831636644	-0.0009852112775888	0.0142402791910418	0.0789303425985779
mee-type_vae_quantileUni_lda_5.csv	lda	0.0263736263736263	0.0240757168134138	-0.0035203244245387	0.0562675771717915	0.0065934065934065	0.0060189292033534	-0.0008800811061346	0.0140668942929478	0.0973782460947394
mee-type_vae_quantileUni_lda_5.csv	gaussian_nb	0.356043956043956	0.0927904695937782	0.2408293705729403	0.4712585415149717	0.3993205644929783	0.0054512911784855	0.392551892492927	0.4060892364930296	0.0729967497934299
mee-type_vae_quantileUni_lda_5.csv	svm_rbf_1	0.0175824175824175	0.0166656603165968	-0.0031107328389938	0.038275568003829	0.0064345910499756	0.0052711399775851	-0.0001103936896844	0.0129795757896357	0.0528024098538166
mee-type_vae_quantileUni_lda_5.csv	svm_rbf_2	0.0263736263736263	0.0199625298072362	0.0015868717989115	0.0511603809483411	0.00722076864934	0.0046001594669946	0.0015089162531766	0.0129326210455035	0.055713814328947
mee-type_vae_quantileUni_lda_5.csv	svm_rbf_3	0.0175824175824175	0.0166656603165968	-0.0031107328389938	0.038275568003829	0.0054022900176746	0.0049780997732643	-0.000778837250254	0.0115834172856033	0.0558674968236638
mee-type_vae_quantileUni_lda_5.csv	svm_rbf_auto	0.0615384615384615	0.0166656603165968	0.04084531111705	0.082231611959873	0.0044456056665839	0.0021157065792125	0.0018186089764129	0.0070726023567549	0.0548814904401914
mee-type_vae_quantileUni_lda_5.csv	svm_rbf_bal	0.0175824175824175	0.0166656603165968	-0.0031107328389938	0.038275568003829	0.0064345910499756	0.0052711399775851	-0.0001103936896844	0.0129795757896357	0.0525996881605941
mee-type_vae_quantileUni_lda_5.csv	svm_linear_bal	0.0593406593406593	0.0147433053461524	0.0410344278778167	0.0776468908035019	0.0128158580505372	0.0021322905572946	0.0101682696318346	0.0154634464692399	0.0643954679724897
mee-type_vae_quantileUni_lda_5.csv	svm_sigmoid	0.0285714285714285	0.0183881324512983	0.005739546512449	0.0514033106304081	0.0143166640559912	0.0172625146813592	-0.0071175789423165	0.0357509070542989	0.0481916011153161
mee-type_vae_quantileUni_lda_5.csv	svm_sigmoid_bal	0.0285714285714285	0.0183881324512983	0.005739546512449	0.0514033106304081	0.0143166640559912	0.0172625146813592	-0.0071175789423165	0.0357509070542989	0.0480866342532855
mee-type_vae_quantileUni_lda_5.csv	svm_poly_3	0.0791208791208791	0.0273624166988763	0.0451459514020348	0.1130958068397234	0.0150706436420722	0.0052771542587038	0.008518191186072	0.0216230960980724	0.0650880164323185
mee-type_vae_quantileUni_lda_5.csv	svm_poly_4	0.0241758241758241	0.0196577404615366	-0.0002324844412993	0.0485841327929476	0.0059940059940059	0.0053050621567839	-0.0005930986943058	0.0125811106823178	0.0757246542373293
mee-type_vae_quantileUni_lda_5.csv	mlp_50_lr0.001	0.07032967032967033	0.05304403686218536	0.004466799438501284	0.13619254122083937	0.07394950287807431	0.13746086570936691	-0.09673070523516925	0.24462971099131786	0.06983184549096255
mee-type_vae_quantileUni_lda_5.csv	mlp_100_lr0.001	0.08351648351648353	0.08245420431782008	-0.018863933485491216	0.18589690051845825	0.07524856096284668	0.13902160354536927	-0.09736955913199544	0.2478666810576888	0.07416281701302634
mee-type_vae_quantileUni_lda_5.csv	mlp_50x2_lr0.001	0.07032967032967033	0.050117601103258816	0.008100449363416487	0.13255889129592419	0.09732318963088193	0.12444496541015083	-0.057195643676615365	0.2518420229383792	0.08650625810849236
mee-type_vae_quantileUni_lda_5.csv	mlp_128_64	0.046153846153846156	0.03509608664323365	0.002576298891102849	0.08973139341658946	0.05152625152625153	0.09690396786225312	-0.068795916651403	0.17184841970390605	0.09971515854381388
mee-type_vae_quantileUni_lda_5.csv	mlp_128_64_es	0.03956043956043956	0.03351197952082837	-0.0020501789191149367	0.08117105803999405	0.009781544767808504	0.007875352534456752	3.003052610767859e-06	0.01956008648300624	0.06039587985095836
mee-type_vae_quantileUni_lda_5.csv	mlp_128_64_alpha	0.039560439560439566	0.006018929203353475	0.03208695186089828	0.04703392725998085	0.012590266875981162	0.00490238499071443	0.006503151927676549	0.018677381824285775	0.10176139974817089
mee-type_vae_quantileUni_lda_5.csv	logistic_l2_1	0.05934065934065934	0.024075716813413892	0.029446708542494197	0.08923461013882447	0.02205513784461153	0.015197158303457978	0.0031853735042043294	0.04092490218501873	0.09064881391882942
mee-type_vae_quantileUni_lda_5.csv	logistic_l2_2	0.04835164835164836	0.009828870230768305	0.036147494043086606	0.060555802660210115	0.013461538461538464	0.005528739504807172	0.006596701662972479	0.02032637526010445	0.06229567183705457
mee-type_vae_quantileUni_lda_5.csv	logistic_l2_3	0.035164835164835165	0.018056787610060424	0.012744372066211308	0.057585298263459025	0.012921144789276659	0.011666470340058929	-0.0015646914180865654	0.027406980996639883	0.10060513648626963
mee-type_vae_quantileUni_lda_5.csv	logistic_l1_1	0.05714285714285715	0.029486610692304915	0.0205303942171719	0.0937553200685424	0.016923076923076923	0.013268974811537212	0.0004474686065185571	0.03339868523963529	0.096206224082375
mee-type_vae_quantileUni_lda_5.csv	logistic_l1_2	0.05274725274725275	0.00919406622564918	0.04133131171776297	0.06416319377674252	0.04330963154492566	0.03009464601676737	0.005942193047219234	0.08067707004263208	0.057639304581506415
mee-type_vae_quantileUni_lda_5.csv	logistic_l1_3	0.03076923076923077	0.023823608119427252	0.0011883142600230129	0.06035014727843853	0.010200056353902507	0.009876815241049091	-0.002063629547818406	0.02246374225562342	0.10279095944446373
mee-type_vae_quantileUni_lda_5.csv	logistic_l2_balanced_1	0.05934065934065934	0.024075716813413892	0.029446708542494197	0.08923461013882447	0.02205513784461153	0.015197158303457978	0.0031853735042043294	0.04092490218501873	0.09064727000869661
mee-type_vae_quantileUni_lda_5.csv	logistic_l1_balanced_1	0.05714285714285715	0.029486610692304915	0.0205303942171719	0.0937553200685424	0.016923076923076923	0.013268974811537212	0.0004474686065185571	0.03339868523963529	0.09620593763787844
mee-type_vae_quantileUni_lda_5.csv	rf_100_10	0.09450549450549452	0.024075716813413892	0.06461154370732938	0.12439944530365965	0.016704890017968106	0.005928891633083879	0.009343198727916318	0.024066581308019894	0.07435348278500656
mee-type_vae_quantileUni_lda_5.csv	rf_100_20	0.09450549450549452	0.024075716813413892	0.06461154370732938	0.12439944530365965	0.01626941218310947	0.005830943699977087	0.009029339315294857	0.02350948505092408	0.07401815126050419
mee-type_vae_quantileUni_lda_5.csv	rf_200_10	0.1032967032967033	0.024075716813413892	0.07340275249853817	0.13319065409486844	0.019360216933790315	0.006479114449578312	0.011315333781507113	0.027405100086073518	0.0738564623772586
mee-type_vae_quantileUni_lda_5.csv	rf_200_20	0.0945054945054945	0.024075716813413892	0.06461154370732936	0.12439944530365965	0.016668873189814994	0.005471637941879827	0.00987493734617706	0.02346280903345293	0.07202862314156432
mee-type_vae_quantileUni_lda_5.csv	rf_bal_100_10	0.08571428571428572	0.01965774046153661	0.06130597709716221	0.11012259433140922	0.0142483960667527	0.004737983808924506	0.008365412147138788	0.02013137998636661	0.07361831998132587
mee-type_vae_quantileUni_lda_5.csv	rf_bal_200_20	0.09450549450549452	0.024075716813413892	0.06461154370732938	0.12439944530365965	0.016374979493645726	0.006862578721249495	0.007853962560630987	0.024895996426660467	0.08082324499030383
mee-type_vae_quantileUni_lda_5.csv	decision_tree	0.05054945054945055	0.024075716813413896	0.02065549975128541	0.08044340134761568	0.006291999328142177	0.0055951828997431565	-0.0006553378418342548	0.01323933649811861	0.11170006464124112
mee-type_vae_quantileUni_lda_5.csv	decision_tree_bal	0.07252747252747252	0.04504154182839384	0.016601011615566846	0.1284539334393782	0.016944397982358743	0.021099559688737286	-0.009254165661097814	0.043142961625815296	0.10911441499676792
mee-type_vae_quantileUni_lda_5.csv	extra_tree	0.05934065934065934	0.024075716813413896	0.029446708542494197	0.08923461013882447	0.008877775761581243	0.00614161386136222	0.0012519549390585562	0.01650359658410393	0.078910639948287
mee-type_vae_quantileUni_lda_5.csv	extra_tree_bal	0.05054945054945055	0.024075716813413896	0.02065549975128541	0.08044340134761568	0.0066275339567265015	0.006131083163664407	-0.0009852112775888449	0.014240279191041847	0.0789303425985779
mee-type_vae_quantileUni_lda_5.csv	lda	0.026373626373626374	0.024075716813413896	-0.003520324424538767	0.05626757717179151	0.006593406593406593	0.006018929203353474	-0.0008800811061346918	0.014066894292947878	0.09737824609473947
mee-type_vae_quantileUni_lda_5.csv	gaussian_nb	0.35604395604395606	0.09279046959377824	0.24082937057294035	0.47125854151497176	0.3993205644929783	0.005451291178485537	0.39255189249292705	0.4060892364930296	0.0729967497934299
mee-type_vae_quantileUni_lda_5.csv	svm_rbf_1	0.017582417582417582	0.016665660316596817	-0.003110732838993869	0.03827556800382903	0.006434591049975666	0.005271139977585178	-0.00011039368968445828	0.012979575789635791	0.05280240985381669
mee-type_vae_quantileUni_lda_5.csv	svm_rbf_2	0.026373626373626374	0.01996252980723621	0.0015868717989115967	0.05116038094834115	0.007220768649340079	0.004600159466994642	0.0015089162531766046	0.012932621045503554	0.05571381432894701
mee-type_vae_quantileUni_lda_5.csv	svm_rbf_3	0.017582417582417582	0.016665660316596817	-0.003110732838993869	0.03827556800382903	0.005402290017674633	0.004978099773264383	-0.000778837250254084	0.01158341728560335	0.055867496823663806
mee-type_vae_quantileUni_lda_5.csv	svm_rbf_auto	0.06153846153846154	0.016665660316596814	0.040845311117050094	0.082231611959873	0.004445605666583941	0.0021157065792125197	0.00181860897641291	0.007072602356754972	0.0548814904401914
mee-type_vae_quantileUni_lda_5.csv	svm_rbf_bal	0.017582417582417582	0.016665660316596817	-0.003110732838993869	0.03827556800382903	0.006434591049975666	0.005271139977585178	-0.00011039368968445828	0.012979575789635791	0.05259968816059416
mee-type_vae_quantileUni_lda_5.csv	svm_linear_bal	0.05934065934065935	0.014743305346152459	0.04103442787781672	0.07764689080350198	0.01281585805053729	0.002132290557294673	0.01016826963183465	0.015463446469239932	0.06439546797248977
mee-type_vae_quantileUni_lda_5.csv	svm_sigmoid	0.028571428571428564	0.018388132451298365	0.0057395465124490085	0.05140331063040812	0.014316664055991224	0.017262514681359267	-0.007117578942316542	0.03575090705429899	0.048191601115316195
mee-type_vae_quantileUni_lda_5.csv	svm_sigmoid_bal	0.028571428571428564	0.018388132451298365	0.0057395465124490085	0.05140331063040812	0.014316664055991224	0.017262514681359267	-0.007117578942316542	0.03575090705429899	0.04808663425328559
mee-type_vae_quantileUni_lda_5.csv	svm_poly_3	0.07912087912087913	0.027362416698876332	0.04514595140203484	0.11309580683972342	0.015070643642072213	0.005277154258703802	0.008518191186072017	0.02162309609807241	0.06508801643231851
mee-type_vae_quantileUni_lda_5.csv	svm_poly_4	0.02417582417582418	0.019657740461536614	-0.00023248444129932502	0.04858413279294768	0.005994005994005994	0.005305062156783918	-0.0005930986943058214	0.01258111068231781	0.07572465423732935
mee-type_smote_quantileUni_lda_5000.csv	mlp_50_lr0.001	0.1318681318681319	0.0591776352432363	0.0583893926877709	0.2053468710484928	0.2361734883474013	0.0551531766817459	0.1676917744751059	0.3046552022196968	0.0998851553242355
mee-type_smote_quantileUni_lda_5000.csv	mlp_100_lr0.001	0.1538461538461538	0.0745310987156622	0.0613035718243449	0.2463887358679626	0.2834322540204892	0.0912669348993505	0.1701093867295588	0.3967551213114197	0.0970628339596422
mee-type_smote_quantileUni_lda_5000.csv	mlp_50x2_lr0.001	0.2637362637362637	0.0681850200329168	0.1790733791445883	0.348399148327939	0.321342383107089	0.0676568464022382	0.2373353126974278	0.4053494535167502	0.085171169215823
mee-type_smote_quantileUni_lda_5000.csv	mlp_128_64	0.2879120879120879	0.1037865402471876	0.1590440773890288	0.4167800984351471	0.3393702095625172	0.0512743603198	0.2757046823224938	0.4030357368025407	0.0819636441509263
mee-type_smote_quantileUni_lda_5000.csv	mlp_128_64_es	0.3076923076923077	0.1173305302421023	0.162007212400531	0.4533774029840844	0.3227764138635592	0.086484114771198	0.21539220213564	0.4301606255914785	0.0798729097070341
mee-type_smote_quantileUni_lda_5000.csv	mlp_128_64_alpha	0.3120879120879121	0.1320054230368813	0.1481815307353584	0.4759942934404657	0.3821942203454808	0.0459191973697335	0.3251780061450696	0.439210434545892	0.0806250729509149
mee-type_smote_quantileUni_lda_5000.csv	mlp_50_lr0.001	0.1318681318681319	0.0591776352432363	0.0583893926877709	0.2053468710484928	0.2361734883474013	0.0551531766817459	0.1676917744751059	0.3046552022196968	0.0998851553242355
mee-type_smote_quantileUni_lda_5000.csv	mlp_100_lr0.001	0.1538461538461538	0.0745310987156622	0.0613035718243449	0.2463887358679626	0.2834322540204892	0.0912669348993505	0.1701093867295588	0.3967551213114197	0.0970628339596422
mee-type_smote_quantileUni_lda_5000.csv	mlp_50x2_lr0.001	0.2637362637362637	0.0681850200329168	0.1790733791445883	0.348399148327939	0.321342383107089	0.0676568464022382	0.2373353126974278	0.4053494535167502	0.085171169215823
mee-type_smote_quantileUni_lda_5000.csv	mlp_128_64	0.2879120879120879	0.1037865402471876	0.1590440773890288	0.4167800984351471	0.3393702095625172	0.0512743603198	0.2757046823224938	0.4030357368025407	0.0819636441509263
mee-type_smote_quantileUni_lda_5000.csv	mlp_128_64_es	0.3076923076923077	0.1173305302421023	0.162007212400531	0.4533774029840844	0.3227764138635592	0.086484114771198	0.21539220213564	0.4301606255914785	0.0798729097070341
mee-type_smote_quantileUni_lda_5000.csv	mlp_128_64_alpha	0.3120879120879121	0.1320054230368813	0.1481815307353584	0.4759942934404657	0.3821942203454808	0.0459191973697335	0.3251780061450696	0.439210434545892	0.0806250729509149
mee-type_smote_quantileUni_lda_5000.csv	logistic_l2_1	0.0439560439560439	0.0	0.0439560439560439	0.0439560439560439	0.0109890109890109	0.0	0.0109890109890109	0.0109890109890109	0.1021449539011935
mee-type_smote_quantileUni_lda_5000.csv	logistic_l2_2	0.0439560439560439	0.0	0.0439560439560439	0.0439560439560439	0.0109890109890109	0.0	0.0109890109890109	0.0109890109890109	0.1016195829175699
mee-type_smote_quantileUni_lda_5000.csv	logistic_l2_3	0.0439560439560439	0.0	0.0439560439560439	0.0439560439560439	0.0109890109890109	0.0	0.0109890109890109	0.0109890109890109	0.1022633382287502
mee-type_smote_quantileUni_lda_5000.csv	logistic_l1_1	0.0439560439560439	0.0	0.0439560439560439	0.0439560439560439	0.0109890109890109	0.0	0.0109890109890109	0.0109890109890109	0.1022675654114937
mee-type_smote_quantileUni_lda_5000.csv	logistic_l1_2	0.0439560439560439	0.0	0.0439560439560439	0.0439560439560439	0.0109890109890109	0.0	0.0109890109890109	0.0109890109890109	0.1018627512643519
mee-type_smote_quantileUni_lda_5000.csv	logistic_l1_3	0.0	0.0	0.0	0.0	0.0	0.0	0.0	0.0	0.1073538693203448
mee-type_smote_quantileUni_lda_5000.csv	logistic_l2_balanced_1	0.0439560439560439	0.0	0.0439560439560439	0.0439560439560439	0.0109890109890109	0.0	0.0109890109890109	0.0109890109890109	0.1021449354266496
mee-type_smote_quantileUni_lda_5000.csv	logistic_l1_balanced_1	0.0439560439560439	0.0	0.0439560439560439	0.0439560439560439	0.0109890109890109	0.0	0.0109890109890109	0.0109890109890109	0.1022675457654393
mee-type_smote_quantileUni_lda_5000.csv	rf_100_10	0.3846153846153846	0.0	0.3846153846153846	0.3846153846153846	0.3539748539748539	0.0138880502638306	0.336730561957011	0.3712191459926968	0.0633293766754572
mee-type_smote_quantileUni_lda_5000.csv	rf_100_20	0.3846153846153846	0.0	0.3846153846153846	0.3846153846153846	0.3503118503118503	0.0	0.3503118503118503	0.3503118503118503	0.0636830415226934
mee-type_smote_quantileUni_lda_5000.csv	rf_200_10	0.3846153846153846	0.0	0.3846153846153846	0.3846153846153846	0.3503118503118503	0.0	0.3503118503118503	0.3503118503118503	0.0627542713496835
mee-type_smote_quantileUni_lda_5000.csv	rf_200_20	0.3846153846153846	0.0	0.3846153846153846	0.3846153846153846	0.3503118503118503	0.0	0.3503118503118503	0.3503118503118503	0.0645524534068165
mee-type_smote_quantileUni_lda_5000.csv	rf_bal_100_10	0.3846153846153846	0.0	0.3846153846153846	0.3846153846153846	0.3521433521433521	0.0150473230083836	0.3334596328944989	0.3708270713922053	0.0626352451357201
mee-type_smote_quantileUni_lda_5000.csv	rf_bal_200_20	0.3846153846153846	0.0	0.3846153846153846	0.3846153846153846	0.3503118503118503	0.0	0.3503118503118503	0.3503118503118503	0.0647080560805039
mee-type_smote_quantileUni_lda_5000.csv	decision_tree	0.345054945054945	0.0060189292033534	0.3375814573554037	0.3525284327544863	0.3048780487804878	0.0118008236672188	0.2902253908837513	0.3195307066772244	0.0770523594053005
mee-type_smote_quantileUni_lda_5000.csv	decision_tree_bal	0.345054945054945	0.0060189292033534	0.3375814573554037	0.3525284327544863	0.3048780487804878	0.0118008236672188	0.2902253908837513	0.3195307066772244	0.0770523594053005
mee-type_smote_quantileUni_lda_5000.csv	extra_tree	0.3296703296703296	0.0320381972244247	0.2898896536094096	0.3694510057312497	0.3070035125182184	0.0209637904950728	0.2809735285946001	0.3330334964418366	0.0640138073691014
mee-type_smote_quantileUni_lda_5000.csv	extra_tree_bal	0.3010989010989011	0.0214215260325471	0.2745005634377025	0.3276972387600996	0.2937790244241857	0.0230381515104634	0.2651733811084795	0.3223846677398919	0.0643396250808015
mee-type_smote_quantileUni_lda_5000.csv	lda	0.0439560439560439	0.0	0.0439560439560439	0.0439560439560439	0.0109890109890109	0.0	0.0109890109890109	0.0109890109890109	0.1056623447824195
mee-type_smote_quantileUni_lda_5000.csv	gaussian_nb	0.3736263736263736	0.0	0.3736263736263736	0.3736263736263736	0.3128741177521665	0.0033961543480296	0.3086572351658749	0.3170910003384582	0.0719282646834612
mee-type_smote_quantileUni_lda_5000.csv	svm_rbf_1	0.0087912087912087	0.0120378584067069	-0.0061557666078737	0.0237381841902913	0.0161943319838056	0.0221750023281443	-0.0113395700671359	0.0437282340347472	0.0847614477829523
mee-type_smote_quantileUni_lda_5000.csv	svm_rbf_2	0.2329670329670329	0.0651973493371047	0.1520138315168357	0.3139202344172301	0.2544796974135078	0.0343726149276352	0.2118004589337417	0.2971589358932739	0.0543705100883904
mee-type_smote_quantileUni_lda_5000.csv	svm_rbf_3	0.0153846153846153	0.0098288702307683	0.0031804610760536	0.0275887696931771	0.0339743589743589	0.021332770887556	0.0074862253813511	0.0604624925673667	0.083386380219508
mee-type_smote_quantileUni_lda_5000.csv	svm_rbf_auto	0.3846153846153846	0.0	0.3846153846153846	0.3846153846153846	0.1495726495726495	0.0	0.1495726495726495	0.1495726495726495	0.05139165014863
mee-type_smote_quantileUni_lda_5000.csv	svm_rbf_bal	0.0087912087912087	0.0120378584067069	-0.0061557666078737	0.0237381841902913	0.0161943319838056	0.0221750023281443	-0.0113395700671359	0.0437282340347472	0.0847409882113219
mee-type_smote_quantileUni_lda_5000.csv	svm_linear_bal	0.0439560439560439	0.0	0.0439560439560439	0.0439560439560439	0.0109890109890109	0.0	0.0109890109890109	0.0109890109890109	0.0939494377317456
mee-type_smote_quantileUni_lda_5000.csv	svm_sigmoid	0.0769230769230769	0.0	0.0769230769230769	0.0769230769230769	0.0137376725838264	0.0001543636670857	0.0135460047757752	0.0139293403918775	0.0512173390945888
mee-type_smote_quantileUni_lda_5000.csv	svm_sigmoid_bal	0.0769230769230769	0.0	0.0769230769230769	0.0769230769230769	0.0137376725838264	0.0001543636670857	0.0135460047757752	0.0139293403918775	0.0498783207539009
mee-type_smote_quantileUni_lda_5000.csv	svm_poly_3	0.156043956043956	0.0162993373342761	0.1358056556814067	0.1762822564065053	0.244204348406029	0.0212839869062668	0.2177767881262771	0.2706319086857809	0.0859405147650869
mee-type_smote_quantileUni_lda_5000.csv	svm_poly_4	0.0	0.0	0.0	0.0	0.0	0.0	0.0	0.0	0.0983056913201012
mee-type_smote_quantileUni_lda_5000.csv	mlp_50_lr0.001	0.1318681318681319	0.05917763524323631	0.05838939268777098	0.2053468710484928	0.23617348834740137	0.05515317668174595	0.16769177447510597	0.3046552022196968	0.09988515532423559
mee-type_smote_quantileUni_lda_5000.csv	mlp_100_lr0.001	0.15384615384615383	0.07453109871566228	0.061303571824344996	0.24638873586796267	0.28343225402048927	0.09126693489935055	0.1701093867295588	0.39675512131141977	0.09706283395964221
mee-type_smote_quantileUni_lda_5000.csv	mlp_50x2_lr0.001	0.2637362637362637	0.0681850200329168	0.17907337914458832	0.34839914832793906	0.321342383107089	0.0676568464022382	0.23733531269742783	0.4053494535167502	0.085171169215823
mee-type_smote_quantileUni_lda_5000.csv	mlp_128_64	0.28791208791208794	0.10378654024718766	0.1590440773890288	0.4167800984351471	0.33937020956251723	0.05127436031980001	0.2757046823224938	0.4030357368025407	0.0819636441509263
mee-type_smote_quantileUni_lda_5000.csv	mlp_128_64_es	0.30769230769230776	0.11733053024210233	0.16200721240053106	0.45337740298408447	0.32277641386355926	0.08648411477119808	0.21539220213564003	0.4301606255914785	0.07987290970703415
mee-type_smote_quantileUni_lda_5000.csv	mlp_128_64_alpha	0.3120879120879121	0.13200542303688131	0.14818153073535847	0.47599429344046573	0.38219422034548084	0.045919197369733517	0.32517800614506964	0.43921043454589204	0.08062507295091496
mee-type_smote_quantileUni_lda_5000.csv	logistic_l2_1	0.04395604395604396	0.0	0.04395604395604396	0.04395604395604396	0.01098901098901099	0.0	0.01098901098901099	0.01098901098901099	0.10214495390119353
mee-type_smote_quantileUni_lda_5000.csv	logistic_l2_2	0.04395604395604396	0.0	0.04395604395604396	0.04395604395604396	0.01098901098901099	0.0	0.01098901098901099	0.01098901098901099	0.1016195829175699
mee-type_smote_quantileUni_lda_5000.csv	logistic_l2_3	0.04395604395604396	0.0	0.04395604395604396	0.04395604395604396	0.01098901098901099	0.0	0.01098901098901099	0.01098901098901099	0.10226333822875022
mee-type_smote_quantileUni_lda_5000.csv	logistic_l1_1	0.04395604395604396	0.0	0.04395604395604396	0.04395604395604396	0.01098901098901099	0.0	0.01098901098901099	0.01098901098901099	0.10226756541149376
mee-type_smote_quantileUni_lda_5000.csv	logistic_l1_2	0.04395604395604396	0.0	0.04395604395604396	0.04395604395604396	0.01098901098901099	0.0	0.01098901098901099	0.01098901098901099	0.10186275126435196
mee-type_smote_quantileUni_lda_5000.csv	logistic_l1_3	0.0	0.0	0.0	0.0	0.0	0.0	0.0	0.0	0.10735386932034488
mee-type_smote_quantileUni_lda_5000.csv	logistic_l2_balanced_1	0.04395604395604396	0.0	0.04395604395604396	0.04395604395604396	0.01098901098901099	0.0	0.01098901098901099	0.01098901098901099	0.10214493542664968
mee-type_smote_quantileUni_lda_5000.csv	logistic_l1_balanced_1	0.04395604395604396	0.0	0.04395604395604396	0.04395604395604396	0.01098901098901099	0.0	0.01098901098901099	0.01098901098901099	0.10226754576543937
mee-type_smote_quantileUni_lda_5000.csv	rf_100_10	0.38461538461538464	0.0	0.38461538461538464	0.38461538461538464	0.35397485397485395	0.013888050263830677	0.33673056195701107	0.37121914599269684	0.06332937667545728
mee-type_smote_quantileUni_lda_5000.csv	rf_100_20	0.38461538461538464	0.0	0.38461538461538464	0.38461538461538464	0.3503118503118503	0.0	0.3503118503118503	0.3503118503118503	0.0636830415226934
mee-type_smote_quantileUni_lda_5000.csv	rf_200_10	0.38461538461538464	0.0	0.38461538461538464	0.38461538461538464	0.3503118503118503	0.0	0.3503118503118503	0.3503118503118503	0.06275427134968352
mee-type_smote_quantileUni_lda_5000.csv	rf_200_20	0.38461538461538464	0.0	0.38461538461538464	0.38461538461538464	0.3503118503118503	0.0	0.3503118503118503	0.3503118503118503	0.06455245340681656
mee-type_smote_quantileUni_lda_5000.csv	rf_bal_100_10	0.38461538461538464	0.0	0.38461538461538464	0.38461538461538464	0.35214335214335213	0.015047323008383677	0.3334596328944989	0.37082707139220533	0.06263524513572012
mee-type_smote_quantileUni_lda_5000.csv	rf_bal_200_20	0.38461538461538464	0.0	0.38461538461538464	0.38461538461538464	0.3503118503118503	0.0	0.3503118503118503	0.3503118503118503	0.06470805608050398
mee-type_smote_quantileUni_lda_5000.csv	decision_tree	0.34505494505494505	0.006018929203353483	0.33758145735540374	0.35252843275448636	0.30487804878048785	0.011800823667218815	0.2902253908837513	0.3195307066772244	0.07705235940530059
mee-type_smote_quantileUni_lda_5000.csv	decision_tree_bal	0.34505494505494505	0.006018929203353483	0.33758145735540374	0.35252843275448636	0.30487804878048785	0.011800823667218815	0.2902253908837513	0.3195307066772244	0.07705235940530059
mee-type_smote_quantileUni_lda_5000.csv	extra_tree	0.32967032967032966	0.03203819722442474	0.2898896536094096	0.3694510057312497	0.3070035125182184	0.020963790495072836	0.2809735285946001	0.33303349644183666	0.06401380736910148
mee-type_smote_quantileUni_lda_5000.csv	extra_tree_bal	0.3010989010989011	0.02142152603254717	0.2745005634377025	0.32769723876009965	0.29377902442418574	0.023038151510463456	0.26517338110847954	0.32238466773989194	0.06433962508080154
mee-type_smote_quantileUni_lda_5000.csv	lda	0.04395604395604396	0.0	0.04395604395604396	0.04395604395604396	0.01098901098901099	0.0	0.01098901098901099	0.01098901098901099	0.10566234478241951
mee-type_smote_quantileUni_lda_5000.csv	gaussian_nb	0.37362637362637363	0.0	0.37362637362637363	0.37362637362637363	0.31287411775216656	0.003396154348029698	0.3086572351658749	0.3170910003384582	0.07192826468346127
mee-type_smote_quantileUni_lda_5000.csv	svm_rbf_1	0.008791208791208791	0.012037858406706948	-0.006155766607873779	0.02373818419029136	0.016194331983805668	0.022175002328144375	-0.011339570067135908	0.043728234034747245	0.08476144778295233
mee-type_smote_quantileUni_lda_5000.csv	svm_rbf_2	0.23296703296703294	0.06519734933710473	0.15201383151683578	0.3139202344172301	0.25447969741350784	0.03437261492763528	0.21180045893374178	0.2971589358932739	0.054370510088390424
mee-type_smote_quantileUni_lda_5000.csv	svm_rbf_3	0.015384615384615385	0.009828870230768307	0.003180461076053633	0.02758876969317714	0.03397435897435898	0.021332770887556075	0.007486225381351189	0.06046249256736677	0.083386380219508
mee-type_smote_quantileUni_lda_5000.csv	svm_rbf_auto	0.38461538461538464	0.0	0.38461538461538464	0.38461538461538464	0.14957264957264957	0.0	0.14957264957264957	0.14957264957264957	0.05139165014863005
mee-type_smote_quantileUni_lda_5000.csv	svm_rbf_bal	0.008791208791208791	0.012037858406706948	-0.006155766607873779	0.02373818419029136	0.016194331983805668	0.022175002328144375	-0.011339570067135908	0.043728234034747245	0.08474098821132191
mee-type_smote_quantileUni_lda_5000.csv	svm_linear_bal	0.04395604395604396	0.0	0.04395604395604396	0.04395604395604396	0.01098901098901099	0.0	0.01098901098901099	0.01098901098901099	0.09394943773174566
mee-type_smote_quantileUni_lda_5000.csv	svm_sigmoid	0.07692307692307693	0.0	0.07692307692307693	0.07692307692307693	0.01373767258382643	0.00015436366708578448	0.013546004775775299	0.01392934039187756	0.05121733909458883
mee-type_smote_quantileUni_lda_5000.csv	svm_sigmoid_bal	0.07692307692307693	0.0	0.07692307692307693	0.07692307692307693	0.01373767258382643	0.00015436366708578448	0.013546004775775299	0.01392934039187756	0.049878320753900994
mee-type_smote_quantileUni_lda_5000.csv	svm_poly_3	0.15604395604395604	0.016299337334276184	0.13580565568140676	0.17628225640650533	0.24420434840602906	0.021283986906266844	0.21777678812627715	0.27063190868578096	0.08594051476508696
mee-type_smote_quantileUni_lda_5000.csv	svm_poly_4	0.0	0.0	0.0	0.0	0.0	0.0	0.0	0.0	0.09830569132010128
mee-type_smote_quantileUni_lda_2000.csv	mlp_50_lr0.001	0.1692307692307692	0.0828195326655682	0.0663967371718723	0.2720648012896661	0.2824841824841825	0.0803215855228701	0.1827517614617897	0.3822166035065752	0.0933877753754021
mee-type_smote_quantileUni_lda_2000.csv	mlp_100_lr0.001	0.1956043956043956	0.0511903942806686	0.1320431259722334	0.2591656652365579	0.3554657760540113	0.0349195858770122	0.3121073834383405	0.398824168669682	0.0924209726283076
mee-type_smote_quantileUni_lda_2000.csv	mlp_50x2_lr0.001	0.2549450549450549	0.04557459638094	0.198356719386174	0.3115333905039358	0.3332998302510497	0.0588582783546123	0.2602176250218716	0.4063820354802279	0.0862449090077392
mee-type_smote_quantileUni_lda_2000.csv	mlp_128_64	0.2351648351648351	0.1103287947077901	0.0981735428109578	0.3721561275187124	0.367417361710042	0.0624821003850288	0.289835587129798	0.444999136290286	0.0877719550903109
mee-type_smote_quantileUni_lda_2000.csv	mlp_128_64_es	0.254945054945055	0.1063722640908137	0.1228664442160682	0.3870236656740417	0.3447147724070801	0.0624888203854673	0.2671246538442237	0.4223048909699365	0.0855744228004541
mee-type_smote_quantileUni_lda_2000.csv	mlp_128_64_alpha	0.2329670329670329	0.0730583302795369	0.1422531344900517	0.3236809314440141	0.3145096038126608	0.0936648242163208	0.1982093636851709	0.4308098439401507	0.0875395986696712
mee-type_smote_quantileUni_lda_2000.csv	mlp_50_lr0.001	0.1692307692307692	0.0828195326655682	0.0663967371718723	0.2720648012896661	0.2824841824841825	0.0803215855228701	0.1827517614617897	0.3822166035065752	0.0933877753754021
mee-type_smote_quantileUni_lda_2000.csv	mlp_100_lr0.001	0.1956043956043956	0.0511903942806686	0.1320431259722334	0.2591656652365579	0.3554657760540113	0.0349195858770122	0.3121073834383405	0.398824168669682	0.0924209726283076
mee-type_smote_quantileUni_lda_2000.csv	mlp_50x2_lr0.001	0.2549450549450549	0.04557459638094	0.198356719386174	0.3115333905039358	0.3332998302510497	0.0588582783546123	0.2602176250218716	0.4063820354802279	0.0862449090077392
mee-type_smote_quantileUni_lda_2000.csv	mlp_128_64	0.2351648351648351	0.1103287947077901	0.0981735428109578	0.3721561275187124	0.367417361710042	0.0624821003850288	0.289835587129798	0.444999136290286	0.0877719550903109
mee-type_smote_quantileUni_lda_2000.csv	mlp_128_64_es	0.254945054945055	0.1063722640908137	0.1228664442160682	0.3870236656740417	0.3447147724070801	0.0624888203854673	0.2671246538442237	0.4223048909699365	0.0855744228004541
mee-type_smote_quantileUni_lda_2000.csv	mlp_128_64_alpha	0.2329670329670329	0.0730583302795369	0.1422531344900517	0.3236809314440141	0.3145096038126608	0.0936648242163208	0.1982093636851709	0.4308098439401507	0.0875395986696712
mee-type_smote_quantileUni_lda_2000.csv	logistic_l2_1	0.0439560439560439	0.0	0.0439560439560439	0.0439560439560439	0.0109890109890109	0.0	0.0109890109890109	0.0109890109890109	0.1013098658345703
mee-type_smote_quantileUni_lda_2000.csv	logistic_l2_2	0.0439560439560439	0.0	0.0439560439560439	0.0439560439560439	0.0109890109890109	0.0	0.0109890109890109	0.0109890109890109	0.1003282171085633
mee-type_smote_quantileUni_lda_2000.csv	logistic_l2_3	0.0439560439560439	0.0	0.0439560439560439	0.0439560439560439	0.0109890109890109	0.0	0.0109890109890109	0.0109890109890109	0.1015340085918351
mee-type_smote_quantileUni_lda_2000.csv	logistic_l1_1	0.0439560439560439	0.0	0.0439560439560439	0.0439560439560439	0.0109890109890109	0.0	0.0109890109890109	0.0109890109890109	0.1015358084201384
mee-type_smote_quantileUni_lda_2000.csv	logistic_l1_2	0.0439560439560439	0.0	0.0439560439560439	0.0439560439560439	0.0109890109890109	0.0	0.0109890109890109	0.0109890109890109	0.1013610037670508
mee-type_smote_quantileUni_lda_2000.csv	logistic_l1_3	0.0	0.0	0.0	0.0	0.0	0.0	0.0	0.0	0.1065940390048357
mee-type_smote_quantileUni_lda_2000.csv	logistic_l2_balanced_1	0.0439560439560439	0.0	0.0439560439560439	0.0439560439560439	0.0109890109890109	0.0	0.0109890109890109	0.0109890109890109	0.1013131015363871
mee-type_smote_quantileUni_lda_2000.csv	logistic_l1_balanced_1	0.0439560439560439	0.0	0.0439560439560439	0.0439560439560439	0.0109890109890109	0.0	0.0109890109890109	0.0109890109890109	0.1015358449755131
mee-type_smote_quantileUni_lda_2000.csv	rf_100_10	0.3846153846153846	0.0	0.3846153846153846	0.3846153846153846	0.3594693594693595	0.017132130891822	0.3381970093284694	0.3807417096102495	0.0635104246512132
mee-type_smote_quantileUni_lda_2000.csv	rf_100_20	0.3846153846153846	0.0	0.3846153846153846	0.3846153846153846	0.353059103059103	0.0150473230083836	0.3343753838102498	0.3717428223079562	0.0638590015100288
mee-type_smote_quantileUni_lda_2000.csv	rf_200_10	0.3846153846153846	0.0	0.3846153846153846	0.3846153846153846	0.3558063558063558	0.0122860877884603	0.3405511629206535	0.371061548692058	0.0632644672223938
mee-type_smote_quantileUni_lda_2000.csv	rf_200_20	0.3846153846153846	0.0	0.3846153846153846	0.3846153846153846	0.3558063558063558	0.0122860877884603	0.3405511629206535	0.371061548692058	0.0642030712996172
mee-type_smote_quantileUni_lda_2000.csv	rf_bal_100_10	0.3824175824175824	0.0049144351153841	0.3763155052633015	0.3885196595718633	0.3613008613008613	0.0245721755769207	0.330790475529457	0.3918112470722657	0.0641191003567217
mee-type_smote_quantileUni_lda_2000.csv	rf_bal_200_20	0.3846153846153846	0.0	0.3846153846153846	0.3846153846153846	0.3503118503118503	0.0	0.3503118503118503	0.3503118503118503	0.0636661449869715
mee-type_smote_quantileUni_lda_2000.csv	decision_tree	0.3384615384615385	0.0049144351153841	0.3323594613072576	0.3445636156158194	0.2833914053426249	0.0010987558184802	0.2820271198000011	0.2847556908852487	0.0778280542986425
mee-type_smote_quantileUni_lda_2000.csv	decision_tree_bal	0.3384615384615385	0.0049144351153841	0.3323594613072576	0.3445636156158194	0.2833914053426249	0.0010987558184802	0.2820271198000011	0.2847556908852487	0.0778280542986425
mee-type_smote_quantileUni_lda_2000.csv	extra_tree	0.3274725274725275	0.0250588005516294	0.2963579169894006	0.3585871379556544	0.3066911717453514	0.0190802081630855	0.2829999641910145	0.3303823792996883	0.0636291661279896
mee-type_smote_quantileUni_lda_2000.csv	extra_tree_bal	0.3252747252747253	0.0335119795208283	0.2836641067951708	0.3668853437542798	0.299426076513363	0.0234391369704535	0.270322543988184	0.328529609038542	0.0627917000646412
mee-type_smote_quantileUni_lda_2000.csv	lda	0.0439560439560439	0.0	0.0439560439560439	0.0439560439560439	0.0109890109890109	0.0	0.0109890109890109	0.0109890109890109	0.1055321881374337
mee-type_smote_quantileUni_lda_2000.csv	gaussian_nb	0.3648351648351648	0.0196577404615366	0.3404268562180413	0.3892434734522883	0.3098129940235203	0.0034487263967608	0.3055308346170075	0.3140951534300332	0.0725540315284342
mee-type_smote_quantileUni_lda_2000.csv	svm_rbf_1	0.0021978021978021	0.0049144351153841	-0.0039042749564786	0.008299879352083	0.0042735042735042	0.0095558460576914	-0.0075916457487085	0.016138654295717	0.0866149766804781
mee-type_smote_quantileUni_lda_2000.csv	svm_rbf_2	0.178021978021978	0.0608874513283299	0.1024202217652066	0.2536237342787494	0.182798174048174	0.0369642049392413	0.1369010515528921	0.2286952965434559	0.0563272283753638
mee-type_smote_quantileUni_lda_2000.csv	svm_rbf_3	0.0219780219780219	0.0	0.0219780219780219	0.0219780219780219	0.048076923076923	0.0	0.048076923076923	0.048076923076923	0.0801633004992598
mee-type_smote_quantileUni_lda_2000.csv	svm_rbf_auto	0.3736263736263736	0.0	0.3736263736263736	0.3736263736263736	0.1469317199654278	0.0	0.1469317199654278	0.1469317199654278	0.0499078847074431
mee-type_smote_quantileUni_lda_2000.csv	svm_rbf_bal	0.0021978021978021	0.0049144351153841	-0.0039042749564786	0.008299879352083	0.0042735042735042	0.0095558460576914	-0.0075916457487085	0.016138654295717	0.0866616145753784
mee-type_smote_quantileUni_lda_2000.csv	svm_linear_bal	0.0439560439560439	0.0	0.0439560439560439	0.0439560439560439	0.0109890109890109	0.0	0.0109890109890109	0.0109890109890109	0.0914264525964183
mee-type_smote_quantileUni_lda_2000.csv	svm_sigmoid	0.0879120879120879	0.0	0.0879120879120879	0.0879120879120879	0.0235573340836498	0.0002097635355365	0.0232968782534382	0.0238177899138614	0.0451920884798084
mee-type_smote_quantileUni_lda_2000.csv	svm_sigmoid_bal	0.0879120879120879	0.0	0.0879120879120879	0.0879120879120879	0.0235573340836498	0.0002097635355365	0.0232968782534382	0.0238177899138614	0.0452433915910615
mee-type_smote_quantileUni_lda_2000.csv	svm_poly_3	0.0527472527472527	0.0049144351153841	0.0466451755929718	0.0588493299015336	0.0271062271062271	0.0095519449160478	0.015245920991145	0.0389665332213092	0.0913708897038477
mee-type_smote_quantileUni_lda_2000.csv	svm_poly_4	0.0087912087912087	0.0049144351153841	0.0026891316369279	0.0148932859454896	0.0087912087912087	0.0055552201055322	0.0018934919840716	0.0156889255983459	0.0941044952790178
mee-type_smote_quantileUni_lda_2000.csv	mlp_50_lr0.001	0.16923076923076924	0.08281953266556823	0.06639673717187235	0.27206480128966615	0.2824841824841825	0.08032158552287019	0.18275176146178973	0.38221660350657527	0.09338777537540219
mee-type_smote_quantileUni_lda_2000.csv	mlp_100_lr0.001	0.19560439560439563	0.05119039428066864	0.1320431259722334	0.2591656652365579	0.3554657760540113	0.03491958587701223	0.31210738343834055	0.39882416866968207	0.09242097262830765
mee-type_smote_quantileUni_lda_2000.csv	mlp_50x2_lr0.001	0.2549450549450549	0.045574596380940045	0.198356719386174	0.31153339050393586	0.33329983025104976	0.05885827835461232	0.2602176250218716	0.4063820354802279	0.08624490900773925
mee-type_smote_quantileUni_lda_2000.csv	mlp_128_64	0.23516483516483516	0.11032879470779018	0.09817354281095786	0.37215612751871247	0.367417361710042	0.06248210038502884	0.289835587129798	0.44499913629028603	0.08777195509031091
mee-type_smote_quantileUni_lda_2000.csv	mlp_128_64_es	0.254945054945055	0.10637226409081374	0.12286644421606827	0.3870236656740417	0.3447147724070801	0.06248882038546736	0.2671246538442237	0.4223048909699365	0.08557442280045416
mee-type_smote_quantileUni_lda_2000.csv	mlp_128_64_alpha	0.23296703296703297	0.07305833027953698	0.14225313449005178	0.32368093144401416	0.31450960381266085	0.09366482421632084	0.19820936368517095	0.43080984394015076	0.08753959866967129
mee-type_smote_quantileUni_lda_2000.csv	logistic_l2_1	0.04395604395604396	0.0	0.04395604395604396	0.04395604395604396	0.01098901098901099	0.0	0.01098901098901099	0.01098901098901099	0.10130986583457031
mee-type_smote_quantileUni_lda_2000.csv	logistic_l2_2	0.04395604395604396	0.0	0.04395604395604396	0.04395604395604396	0.01098901098901099	0.0	0.01098901098901099	0.01098901098901099	0.1003282171085633
mee-type_smote_quantileUni_lda_2000.csv	logistic_l2_3	0.04395604395604396	0.0	0.04395604395604396	0.04395604395604396	0.01098901098901099	0.0	0.01098901098901099	0.01098901098901099	0.10153400859183519
mee-type_smote_quantileUni_lda_2000.csv	logistic_l1_1	0.04395604395604396	0.0	0.04395604395604396	0.04395604395604396	0.01098901098901099	0.0	0.01098901098901099	0.01098901098901099	0.10153580842013846
mee-type_smote_quantileUni_lda_2000.csv	logistic_l1_2	0.04395604395604396	0.0	0.04395604395604396	0.04395604395604396	0.01098901098901099	0.0	0.01098901098901099	0.01098901098901099	0.10136100376705089
mee-type_smote_quantileUni_lda_2000.csv	logistic_l1_3	0.0	0.0	0.0	0.0	0.0	0.0	0.0	0.0	0.10659403900483577
mee-type_smote_quantileUni_lda_2000.csv	logistic_l2_balanced_1	0.04395604395604396	0.0	0.04395604395604396	0.04395604395604396	0.01098901098901099	0.0	0.01098901098901099	0.01098901098901099	0.10131310153638713
mee-type_smote_quantileUni_lda_2000.csv	logistic_l1_balanced_1	0.04395604395604396	0.0	0.04395604395604396	0.04395604395604396	0.01098901098901099	0.0	0.01098901098901099	0.01098901098901099	0.10153584497551313
mee-type_smote_quantileUni_lda_2000.csv	rf_100_10	0.38461538461538464	0.0	0.38461538461538464	0.38461538461538464	0.3594693594693595	0.017132130891822073	0.3381970093284694	0.38074170961024956	0.06351042465121323
mee-type_smote_quantileUni_lda_2000.csv	rf_100_20	0.38461538461538464	0.0	0.38461538461538464	0.38461538461538464	0.35305910305910304	0.015047323008383693	0.33437538381024984	0.37174282230795624	0.06385900151002881
mee-type_smote_quantileUni_lda_2000.csv	rf_200_10	0.38461538461538464	0.0	0.38461538461538464	0.38461538461538464	0.3558063558063558	0.012286087788460388	0.34055116292065357	0.371061548692058	0.06326446722239383
mee-type_smote_quantileUni_lda_2000.csv	rf_200_20	0.38461538461538464	0.0	0.38461538461538464	0.38461538461538464	0.3558063558063558	0.012286087788460388	0.34055116292065357	0.371061548692058	0.06420307129961723
mee-type_smote_quantileUni_lda_2000.csv	rf_bal_100_10	0.38241758241758245	0.0049144351153841605	0.37631550526330154	0.38851965957186335	0.36130086130086136	0.024572175576920756	0.330790475529457	0.3918112470722657	0.06411910035672178
mee-type_smote_quantileUni_lda_2000.csv	rf_bal_200_20	0.38461538461538464	0.0	0.38461538461538464	0.38461538461538464	0.3503118503118503	0.0	0.3503118503118503	0.3503118503118503	0.06366614498697151
mee-type_smote_quantileUni_lda_2000.csv	decision_tree	0.3384615384615385	0.0049144351153841605	0.3323594613072576	0.3445636156158194	0.2833914053426249	0.0010987558184802184	0.2820271198000011	0.2847556908852487	0.07782805429864255
mee-type_smote_quantileUni_lda_2000.csv	decision_tree_bal	0.3384615384615385	0.0049144351153841605	0.3323594613072576	0.3445636156158194	0.2833914053426249	0.0010987558184802184	0.2820271198000011	0.2847556908852487	0.07782805429864255
mee-type_smote_quantileUni_lda_2000.csv	extra_tree	0.32747252747252753	0.025058800551629408	0.2963579169894006	0.35858713795565444	0.3066911717453514	0.019080208163085526	0.2829999641910145	0.3303823792996883	0.06362916612798966
mee-type_smote_quantileUni_lda_2000.csv	extra_tree_bal	0.3252747252747253	0.03351197952082838	0.2836641067951708	0.3668853437542798	0.29942607651336306	0.02343913697045351	0.27032254398818406	0.32852960903854206	0.06279170006464123
mee-type_smote_quantileUni_lda_2000.csv	lda	0.04395604395604396	0.0	0.04395604395604396	0.04395604395604396	0.01098901098901099	0.0	0.01098901098901099	0.01098901098901099	0.1055321881374337
mee-type_smote_quantileUni_lda_2000.csv	gaussian_nb	0.3648351648351648	0.019657740461536618	0.3404268562180413	0.3892434734522883	0.30981299402352036	0.0034487263967608204	0.3055308346170075	0.31409515343003325	0.07255403152843429
mee-type_smote_quantileUni_lda_2000.csv	svm_rbf_1	0.002197802197802198	0.004914435115384153	-0.0039042749564786776	0.008299879352083074	0.004273504273504274	0.00955584605769141	-0.007591645748708542	0.016138654295717092	0.08661497668047814
mee-type_smote_quantileUni_lda_2000.csv	svm_rbf_2	0.17802197802197803	0.06088745132832997	0.10242022176520661	0.25362373427874946	0.18279817404817403	0.036964204939241393	0.13690105155289214	0.2286952965434559	0.05632722837536382
mee-type_smote_quantileUni_lda_2000.csv	svm_rbf_3	0.02197802197802198	0.0	0.02197802197802198	0.02197802197802198	0.04807692307692308	0.0	0.04807692307692308	0.04807692307692308	0.08016330049925989
mee-type_smote_quantileUni_lda_2000.csv	svm_rbf_auto	0.37362637362637363	0.0	0.37362637362637363	0.37362637362637363	0.14693171996542784	0.0	0.14693171996542784	0.14693171996542784	0.04990788470744317
mee-type_smote_quantileUni_lda_2000.csv	svm_rbf_bal	0.002197802197802198	0.004914435115384153	-0.0039042749564786776	0.008299879352083074	0.004273504273504274	0.00955584605769141	-0.007591645748708542	0.016138654295717092	0.08666161457537849
mee-type_smote_quantileUni_lda_2000.csv	svm_linear_bal	0.04395604395604396	0.0	0.04395604395604396	0.04395604395604396	0.01098901098901099	0.0	0.01098901098901099	0.01098901098901099	0.09142645259641832
mee-type_smote_quantileUni_lda_2000.csv	svm_sigmoid	0.08791208791208792	0.0	0.08791208791208792	0.08791208791208792	0.02355733408364987	0.00020976353553650025	0.023296878253438263	0.02381778991386148	0.04519208847980842
mee-type_smote_quantileUni_lda_2000.csv	svm_sigmoid_bal	0.08791208791208792	0.0	0.08791208791208792	0.08791208791208792	0.02355733408364987	0.00020976353553650025	0.023296878253438263	0.02381778991386148	0.04524339159106157
mee-type_smote_quantileUni_lda_2000.csv	svm_poly_3	0.05274725274725275	0.004914435115384151	0.04664517559297188	0.05884932990153362	0.02710622710622711	0.009551944916047838	0.015245920991145013	0.038966533221309205	0.0913708897038477
mee-type_smote_quantileUni_lda_2000.csv	svm_poly_4	0.008791208791208791	0.004914435115384154	0.002689131636927915	0.014893285945489668	0.008791208791208791	0.005555220105532272	0.0018934919840716416	0.01568892559834594	0.09410449527901787
mee-type_smote_quantileUni_lda_10000.csv	mlp_50_lr0.001	0.1648351648351648	0.0757365316048913	0.0707958401925495	0.2588744894777801	0.3050432107574964	0.0539074017522471	0.2381083307650245	0.3719780907499684	0.0960760922919653
mee-type_smote_quantileUni_lda_10000.csv	mlp_100_lr0.001	0.2065934065934065	0.0774705790418222	0.1104009776771766	0.3027858355096365	0.3253777594954065	0.0658755583499474	0.2435824503307052	0.4071730686601078	0.0922747718793317
mee-type_smote_quantileUni_lda_10000.csv	mlp_50x2_lr0.001	0.167032967032967	0.1011347284821409	0.0414576157085795	0.2926083183573545	0.3381656804733728	0.079745926793822	0.2391480341700908	0.4371833267766548	0.0967941991846747
mee-type_smote_quantileUni_lda_10000.csv	mlp_128_64	0.265934065934066	0.1448299954054206	0.0861038747791382	0.4457642570889937	0.2908920619529863	0.1603973646045748	0.0917324289167227	0.4900516949892499	0.0846549813130527
mee-type_smote_quantileUni_lda_10000.csv	mlp_128_64_es	0.2967032967032967	0.0780915956239115	0.1997397738547989	0.3936668195517944	0.3368873366849075	0.0782226446735362	0.239761094949492	0.434013578420323	0.0811473844179232
mee-type_smote_quantileUni_lda_10000.csv	mlp_128_64_alpha	0.2285714285714286	0.1105474843073344	0.0913085972150155	0.3658342599278416	0.3270940170940171	0.0849362844145133	0.2216316905953201	0.432556343592714	0.0892217121758492
mee-type_smote_quantileUni_lda_10000.csv	mlp_50_lr0.001	0.1648351648351648	0.0757365316048913	0.0707958401925495	0.2588744894777801	0.3050432107574964	0.0539074017522471	0.2381083307650245	0.3719780907499684	0.0960760922919653
mee-type_smote_quantileUni_lda_10000.csv	mlp_100_lr0.001	0.2065934065934065	0.0774705790418222	0.1104009776771766	0.3027858355096365	0.3253777594954065	0.0658755583499474	0.2435824503307052	0.4071730686601078	0.0922747718793317
mee-type_smote_quantileUni_lda_10000.csv	mlp_50x2_lr0.001	0.167032967032967	0.1011347284821409	0.0414576157085795	0.2926083183573545	0.3381656804733728	0.079745926793822	0.2391480341700908	0.4371833267766548	0.0967941991846747
mee-type_smote_quantileUni_lda_10000.csv	mlp_128_64	0.265934065934066	0.1448299954054206	0.0861038747791382	0.4457642570889937	0.2908920619529863	0.1603973646045748	0.0917324289167227	0.4900516949892499	0.0846549813130527
mee-type_smote_quantileUni_lda_10000.csv	mlp_128_64_es	0.2967032967032967	0.0780915956239115	0.1997397738547989	0.3936668195517944	0.3368873366849075	0.0782226446735362	0.239761094949492	0.434013578420323	0.0811473844179232
mee-type_smote_quantileUni_lda_10000.csv	mlp_128_64_alpha	0.2285714285714286	0.1105474843073344	0.0913085972150155	0.3658342599278416	0.3270940170940171	0.0849362844145133	0.2216316905953201	0.432556343592714	0.0892217121758492
mee-type_smote_quantileUni_lda_10000.csv	logistic_l2_1	0.0439560439560439	0.0	0.0439560439560439	0.0439560439560439	0.0109890109890109	0.0	0.0109890109890109	0.0109890109890109	0.1021773615707088
mee-type_smote_quantileUni_lda_10000.csv	logistic_l2_2	0.0439560439560439	0.0	0.0439560439560439	0.0439560439560439	0.0109890109890109	0.0	0.0109890109890109	0.0109890109890109	0.1018853606155971
mee-type_smote_quantileUni_lda_10000.csv	logistic_l2_3	0.0439560439560439	0.0	0.0439560439560439	0.0439560439560439	0.0109890109890109	0.0	0.0109890109890109	0.0109890109890109	0.1022478553018255
mee-type_smote_quantileUni_lda_10000.csv	logistic_l1_1	0.0439560439560439	0.0	0.0439560439560439	0.0439560439560439	0.0109890109890109	0.0	0.0109890109890109	0.0109890109890109	0.1022507362498498
mee-type_smote_quantileUni_lda_10000.csv	logistic_l1_2	0.0439560439560439	0.0	0.0439560439560439	0.0439560439560439	0.0109890109890109	0.0	0.0109890109890109	0.0109890109890109	0.1021868849753645
mee-type_smote_quantileUni_lda_10000.csv	logistic_l1_3	0.0	0.0	0.0	0.0	0.0	0.0	0.0	0.0	0.1073231708702872
mee-type_smote_quantileUni_lda_10000.csv	logistic_l2_balanced_1	0.0439560439560439	0.0	0.0439560439560439	0.0439560439560439	0.0109890109890109	0.0	0.0109890109890109	0.0109890109890109	0.1021773491900175
mee-type_smote_quantileUni_lda_10000.csv	logistic_l1_balanced_1	0.0439560439560439	0.0	0.0439560439560439	0.0439560439560439	0.0109890109890109	0.0	0.0109890109890109	0.0109890109890109	0.102250739401402
mee-type_smote_quantileUni_lda_10000.csv	rf_100_10	0.3846153846153846	0.0	0.3846153846153846	0.3846153846153846	0.3503118503118503	0.0	0.3503118503118503	0.3503118503118503	0.0635243717954334
mee-type_smote_quantileUni_lda_10000.csv	rf_100_20	0.389010989010989	0.0060189292033534	0.3815375013114477	0.3964844767105303	0.3510777984462195	0.0010488176776825	0.3497755192951615	0.3523800775972776	0.0640960021352429
mee-type_smote_quantileUni_lda_10000.csv	rf_200_10	0.3824175824175824	0.0049144351153841	0.3763155052633015	0.3885196595718633	0.3484803484803485	0.0198530067661893	0.3238295847226753	0.3731311122380216	0.0629891549248149
mee-type_smote_quantileUni_lda_10000.csv	rf_200_20	0.3868131868131868	0.0049144351153841	0.380711109658906	0.3929152639674677	0.3506948243790349	0.0008563560478443	0.3496315179047826	0.3517581308532873	0.0642831849510223
mee-type_smote_quantileUni_lda_10000.csv	rf_bal_100_10	0.3846153846153846	0.0077704041888631	0.3749671534825815	0.3942636157481877	0.3433688170530276	0.0118971323084927	0.3285965761837052	0.3581410579223499	0.0625496824329359
mee-type_smote_quantileUni_lda_10000.csv	rf_bal_200_20	0.389010989010989	0.0060189292033534	0.3815375013114477	0.3964844767105303	0.3510777984462195	0.0010488176776825	0.3497755192951615	0.3523800775972776	0.0635452135616678
mee-type_smote_quantileUni_lda_10000.csv	decision_tree	0.3406593406593406	0.0077704041888631	0.3310111095265375	0.3503075717921438	0.2888859108371304	0.0126057495896263	0.2732338054013195	0.3045380162729413	0.0775694893341952
mee-type_smote_quantileUni_lda_10000.csv	decision_tree_bal	0.3406593406593406	0.0077704041888631	0.3310111095265375	0.3503075717921438	0.2888859108371304	0.0126057495896263	0.2732338054013195	0.3045380162729413	0.0775694893341952
mee-type_smote_quantileUni_lda_10000.csv	extra_tree	0.3076923076923077	0.0245721755769207	0.2771819219209033	0.338202693463712	0.2954035570303173	0.0232860416919339	0.266490117400771	0.3243169966598635	0.0637685585003232
mee-type_smote_quantileUni_lda_10000.csv	extra_tree_bal	0.3032967032967033	0.0306906374588328	0.2651892436821466	0.3414041629112599	0.2875811151352946	0.0253701476287835	0.2560799161955194	0.3190823140750699	0.0638136263736263
mee-type_smote_quantileUni_lda_10000.csv	lda	0.0439560439560439	0.0	0.0439560439560439	0.0439560439560439	0.0109890109890109	0.0	0.0109890109890109	0.0109890109890109	0.105903112579892
mee-type_smote_quantileUni_lda_10000.csv	gaussian_nb	0.3736263736263736	0.0	0.3736263736263736	0.3736263736263736	0.3159117305458768	0.0041594226202036	0.3107471252250556	0.321076335866698	0.0717399051288622
mee-type_smote_quantileUni_lda_10000.csv	svm_rbf_1	0.0571428571428571	0.0143279173740717	0.0393523979702339	0.0749333163154802	0.0892893338545512	0.0170539602210902	0.0681140454212242	0.1104646222878782	0.0727244991574125
mee-type_smote_quantileUni_lda_10000.csv	svm_rbf_2	0.210989010989011	0.0091940662256491	0.1995730699595212	0.2224049520185007	0.2389352582900969	0.0131230244392315	0.222640871296355	0.255229645283839	0.0577766072424303
mee-type_smote_quantileUni_lda_10000.csv	svm_rbf_3	0.0021978021978021	0.0049144351153841	-0.0039042749564786	0.008299879352083	0.0051282051282051	0.0114670152692296	-0.0091099748984502	0.0193663851548605	0.0864518671540067
mee-type_smote_quantileUni_lda_10000.csv	svm_rbf_auto	0.3846153846153846	0.0	0.3846153846153846	0.3846153846153846	0.1495726495726495	0.0	0.1495726495726495	0.1495726495726495	0.0530254393261026
mee-type_smote_quantileUni_lda_10000.csv	svm_rbf_bal	0.0571428571428571	0.0143279173740717	0.0393523979702339	0.0749333163154802	0.0892893338545512	0.0170539602210902	0.0681140454212242	0.1104646222878782	0.0727107179419576
mee-type_smote_quantileUni_lda_10000.csv	svm_linear_bal	0.0439560439560439	0.0	0.0439560439560439	0.0439560439560439	0.0109890109890109	0.0	0.0109890109890109	0.0109890109890109	0.0930305063054104
mee-type_smote_quantileUni_lda_10000.csv	svm_sigmoid	0.0769230769230769	0.0	0.0769230769230769	0.0769230769230769	0.0153846153846153	0.0	0.0153846153846153	0.0153846153846153	0.0434438637746628
mee-type_smote_quantileUni_lda_10000.csv	svm_sigmoid_bal	0.0769230769230769	0.0	0.0769230769230769	0.0769230769230769	0.0153846153846153	0.0	0.0153846153846153	0.0153846153846153	0.0413402089744972
mee-type_smote_quantileUni_lda_10000.csv	svm_poly_3	0.1868131868131868	0.0	0.1868131868131868	0.1868131868131868	0.2779480135249366	0.0	0.2779480135249366	0.2779480135249366	0.0861053920014055
mee-type_smote_quantileUni_lda_10000.csv	svm_poly_4	0.0043956043956043	0.0098288702307683	-0.0078085499129573	0.0165997587041661	0.0008372579801151	0.0018721657582415	-0.0014873428405633	0.0031618588007935	0.0994770401245464
mee-type_smote_quantileUni_lda_10000.csv	mlp_50_lr0.001	0.16483516483516486	0.07573653160489133	0.07079584019254957	0.25887448947778013	0.30504321075749646	0.05390740175224718	0.23810833076502452	0.3719780907499684	0.09607609229196531
mee-type_smote_quantileUni_lda_10000.csv	mlp_100_lr0.001	0.20659340659340658	0.07747057904182228	0.1104009776771766	0.30278583550963656	0.32537775949540654	0.06587555834994746	0.24358245033070525	0.40717306866010783	0.09227477187933174
mee-type_smote_quantileUni_lda_10000.csv	mlp_50x2_lr0.001	0.16703296703296705	0.10113472848214099	0.04145761570857953	0.29260831835735457	0.3381656804733728	0.07974592679382206	0.23914803417009084	0.4371833267766548	0.09679419918467476
mee-type_smote_quantileUni_lda_10000.csv	mlp_128_64	0.265934065934066	0.14482999540542063	0.08610387477913828	0.4457642570889937	0.29089206195298634	0.1603973646045748	0.0917324289167227	0.49005169498924994	0.08465498131305273
mee-type_smote_quantileUni_lda_10000.csv	mlp_128_64_es	0.2967032967032967	0.07809159562391152	0.19973977385479896	0.39366681955179444	0.33688733668490756	0.0782226446735362	0.23976109494949205	0.43401357842032307	0.08114738441792323
mee-type_smote_quantileUni_lda_10000.csv	mlp_128_64_alpha	0.2285714285714286	0.11054748430733444	0.09130859721501558	0.3658342599278416	0.3270940170940171	0.08493628441451335	0.22163169059532017	0.432556343592714	0.08922171217584922
mee-type_smote_quantileUni_lda_10000.csv	logistic_l2_1	0.04395604395604396	0.0	0.04395604395604396	0.04395604395604396	0.01098901098901099	0.0	0.01098901098901099	0.01098901098901099	0.10217736157070889
mee-type_smote_quantileUni_lda_10000.csv	logistic_l2_2	0.04395604395604396	0.0	0.04395604395604396	0.04395604395604396	0.01098901098901099	0.0	0.01098901098901099	0.01098901098901099	0.10188536061559719
mee-type_smote_quantileUni_lda_10000.csv	logistic_l2_3	0.04395604395604396	0.0	0.04395604395604396	0.04395604395604396	0.01098901098901099	0.0	0.01098901098901099	0.01098901098901099	0.10224785530182552
mee-type_smote_quantileUni_lda_10000.csv	logistic_l1_1	0.04395604395604396	0.0	0.04395604395604396	0.04395604395604396	0.01098901098901099	0.0	0.01098901098901099	0.01098901098901099	0.10225073624984986
mee-type_smote_quantileUni_lda_10000.csv	logistic_l1_2	0.04395604395604396	0.0	0.04395604395604396	0.04395604395604396	0.01098901098901099	0.0	0.01098901098901099	0.01098901098901099	0.10218688497536457
mee-type_smote_quantileUni_lda_10000.csv	logistic_l1_3	0.0	0.0	0.0	0.0	0.0	0.0	0.0	0.0	0.10732317087028723
mee-type_smote_quantileUni_lda_10000.csv	logistic_l2_balanced_1	0.04395604395604396	0.0	0.04395604395604396	0.04395604395604396	0.01098901098901099	0.0	0.01098901098901099	0.01098901098901099	0.10217734919001757
mee-type_smote_quantileUni_lda_10000.csv	logistic_l1_balanced_1	0.04395604395604396	0.0	0.04395604395604396	0.04395604395604396	0.01098901098901099	0.0	0.01098901098901099	0.01098901098901099	0.10225073940140209
mee-type_smote_quantileUni_lda_10000.csv	rf_100_10	0.38461538461538464	0.0	0.38461538461538464	0.38461538461538464	0.3503118503118503	0.0	0.3503118503118503	0.3503118503118503	0.06352437179543348
mee-type_smote_quantileUni_lda_10000.csv	rf_100_20	0.389010989010989	0.006018929203353452	0.38153750131144776	0.3964844767105303	0.35107779844621956	0.0010488176776825052	0.3497755192951615	0.35238007759727763	0.06409600213524294
mee-type_smote_quantileUni_lda_10000.csv	rf_200_10	0.3824175824175824	0.0049144351153841605	0.3763155052633015	0.3885196595718633	0.3484803484803485	0.019853006766189365	0.32382958472267537	0.3731311122380216	0.06298915492481494
mee-type_smote_quantileUni_lda_10000.csv	rf_200_20	0.3868131868131868	0.004914435115384135	0.380711109658906	0.3929152639674677	0.35069482437903493	0.0008563560478443233	0.3496315179047826	0.3517581308532873	0.06428318495102234
mee-type_smote_quantileUni_lda_10000.csv	rf_bal_100_10	0.38461538461538464	0.0077704041888631515	0.37496715348258153	0.39426361574818775	0.3433688170530276	0.011897132308492764	0.32859657618370525	0.3581410579223499	0.06254968243293599
mee-type_smote_quantileUni_lda_10000.csv	rf_bal_200_20	0.389010989010989	0.006018929203353452	0.38153750131144776	0.3964844767105303	0.35107779844621956	0.0010488176776825052	0.3497755192951615	0.35238007759727763	0.06354521356166787
mee-type_smote_quantileUni_lda_10000.csv	decision_tree	0.34065934065934067	0.0077704041888631715	0.3310111095265375	0.35030757179214383	0.2888859108371304	0.012605749589626307	0.2732338054013195	0.3045380162729413	0.07756948933419523
mee-type_smote_quantileUni_lda_10000.csv	decision_tree_bal	0.34065934065934067	0.0077704041888631715	0.3310111095265375	0.35030757179214383	0.2888859108371304	0.012605749589626307	0.2732338054013195	0.3045380162729413	0.07756948933419523
mee-type_smote_quantileUni_lda_10000.csv	extra_tree	0.3076923076923077	0.02457217557692076	0.27718192192090335	0.33820269346371207	0.2954035570303173	0.023286041691933906	0.26649011740077105	0.3243169966598635	0.06376855850032322
mee-type_smote_quantileUni_lda_10000.csv	extra_tree_bal	0.3032967032967033	0.03069063745883283	0.26518924368214664	0.3414041629112599	0.28758111513529466	0.02537014762878355	0.25607991619551945	0.3190823140750699	0.06381362637362638
mee-type_smote_quantileUni_lda_10000.csv	lda	0.04395604395604396	0.0	0.04395604395604396	0.04395604395604396	0.01098901098901099	0.0	0.01098901098901099	0.01098901098901099	0.105903112579892
mee-type_smote_quantileUni_lda_10000.csv	gaussian_nb	0.37362637362637363	0.0	0.37362637362637363	0.37362637362637363	0.31591173054587685	0.004159422620203619	0.31074712522505565	0.32107633586669804	0.07173990512886225
mee-type_smote_quantileUni_lda_10000.csv	svm_rbf_1	0.05714285714285714	0.014327917374071755	0.039352397970233995	0.07493331631548028	0.08928933385455125	0.01705396022109029	0.06811404542122429	0.1104646222878782	0.07272449915741257
mee-type_smote_quantileUni_lda_10000.csv	svm_rbf_2	0.210989010989011	0.009194066225649182	0.1995730699595212	0.22240495201850077	0.23893525829009699	0.013123024439231565	0.222640871296355	0.255229645283839	0.05777660724243039
mee-type_smote_quantileUni_lda_10000.csv	svm_rbf_3	0.002197802197802198	0.004914435115384153	-0.0039042749564786776	0.008299879352083074	0.005128205128205129	0.011467015269229691	-0.00910997489845025	0.019366385154860506	0.08645186715400677
mee-type_smote_quantileUni_lda_10000.csv	svm_rbf_auto	0.38461538461538464	0.0	0.38461538461538464	0.38461538461538464	0.14957264957264957	0.0	0.14957264957264957	0.14957264957264957	0.05302543932610267
mee-type_smote_quantileUni_lda_10000.csv	svm_rbf_bal	0.05714285714285714	0.014327917374071755	0.039352397970233995	0.07493331631548028	0.08928933385455125	0.01705396022109029	0.06811404542122429	0.1104646222878782	0.0727107179419576
mee-type_smote_quantileUni_lda_10000.csv	svm_linear_bal	0.04395604395604396	0.0	0.04395604395604396	0.04395604395604396	0.01098901098901099	0.0	0.01098901098901099	0.01098901098901099	0.09303050630541046
mee-type_smote_quantileUni_lda_10000.csv	svm_sigmoid	0.07692307692307693	0.0	0.07692307692307693	0.07692307692307693	0.015384615384615385	0.0	0.015384615384615385	0.015384615384615385	0.043443863774662875
mee-type_smote_quantileUni_lda_10000.csv	svm_sigmoid_bal	0.07692307692307693	0.0	0.07692307692307693	0.07692307692307693	0.015384615384615385	0.0	0.015384615384615385	0.015384615384615385	0.041340208974497264
mee-type_smote_quantileUni_lda_10000.csv	svm_poly_3	0.18681318681318682	0.0	0.18681318681318682	0.18681318681318682	0.2779480135249366	0.0	0.2779480135249366	0.2779480135249366	0.0861053920014055
mee-type_smote_quantileUni_lda_10000.csv	svm_poly_4	0.004395604395604396	0.009828870230768305	-0.007808549912957355	0.016599758704166148	0.0008372579801151228	0.001872165758241582	-0.001487342840563306	0.0031618588007935517	0.09947704012454646
mee-type_smote_quantileUni_lda_1000.csv	mlp_50_lr0.001	0.2439560439560439	0.0406741879633444	0.1934523691057861	0.2944597188063018	0.380321707278229	0.0391609262188133	0.3316969950560146	0.4289464195004435	0.0830263785252999
mee-type_smote_quantileUni_lda_1000.csv	mlp_100_lr0.001	0.2571428571428571	0.02278729819047	0.2288486893634166	0.2854370249222975	0.3252936276808956	0.0423415453484571	0.2727196551934042	0.377867600168387	0.0841823082754151
mee-type_smote_quantileUni_lda_1000.csv	mlp_50x2_lr0.001	0.2791208791208791	0.10895204006985	0.1438390534352921	0.414402704806466	0.3608370663522439	0.0674438152863733	0.2770945090096492	0.4445796236948385	0.0815706609531628
mee-type_smote_quantileUni_lda_1000.csv	mlp_128_64	0.3604395604395604	0.0674728854198186	0.2766609077588436	0.4442182131202771	0.356953581432573	0.0447537714002764	0.3013844347010083	0.4125227281641376	0.0731068737068435
mee-type_smote_quantileUni_lda_1000.csv	mlp_128_64_es	0.2285714285714285	0.0661169624461157	0.1464763766314962	0.3106664805113608	0.3225767821921668	0.0671667502961881	0.2391782464730477	0.4059753179112858	0.0864905220769028
mee-type_smote_quantileUni_lda_1000.csv	mlp_128_64_alpha	0.2285714285714285	0.0863179643369471	0.1213935198560046	0.3357493372868525	0.3640374609948646	0.059242774517242	0.2904778407231016	0.4375970812666276	0.088020758541734
mee-type_smote_quantileUni_lda_1000.csv	mlp_50_lr0.001	0.2439560439560439	0.0406741879633444	0.1934523691057861	0.2944597188063018	0.380321707278229	0.0391609262188133	0.3316969950560146	0.4289464195004435	0.0830263785252999
mee-type_smote_quantileUni_lda_1000.csv	mlp_100_lr0.001	0.2571428571428571	0.02278729819047	0.2288486893634166	0.2854370249222975	0.3252936276808956	0.0423415453484571	0.2727196551934042	0.377867600168387	0.0841823082754151
mee-type_smote_quantileUni_lda_1000.csv	mlp_50x2_lr0.001	0.2791208791208791	0.10895204006985	0.1438390534352921	0.414402704806466	0.3608370663522439	0.0674438152863733	0.2770945090096492	0.4445796236948385	0.0815706609531628
mee-type_smote_quantileUni_lda_1000.csv	mlp_128_64	0.3604395604395604	0.0674728854198186	0.2766609077588436	0.4442182131202771	0.356953581432573	0.0447537714002764	0.3013844347010083	0.4125227281641376	0.0731068737068435
mee-type_smote_quantileUni_lda_1000.csv	mlp_128_64_es	0.2285714285714285	0.0661169624461157	0.1464763766314962	0.3106664805113608	0.3225767821921668	0.0671667502961881	0.2391782464730477	0.4059753179112858	0.0864905220769028
mee-type_smote_quantileUni_lda_1000.csv	mlp_128_64_alpha	0.2285714285714285	0.0863179643369471	0.1213935198560046	0.3357493372868525	0.3640374609948646	0.059242774517242	0.2904778407231016	0.4375970812666276	0.088020758541734
mee-type_smote_quantileUni_lda_1000.csv	logistic_l2_1	0.0439560439560439	0.0	0.0439560439560439	0.0439560439560439	0.0109890109890109	0.0	0.0109890109890109	0.0109890109890109	0.1022502647047735
mee-type_smote_quantileUni_lda_1000.csv	logistic_l2_2	0.0439560439560439	0.0	0.0439560439560439	0.0439560439560439	0.0109890109890109	0.0	0.0109890109890109	0.0109890109890109	0.1004093884402374
mee-type_smote_quantileUni_lda_1000.csv	logistic_l2_3	0.0329670329670329	0.0077704041888631	0.0233188018342298	0.0426152640998361	0.0087284144427001	0.0016673052492749	0.0066581815406592	0.010798647344741	0.1035985283631829
mee-type_smote_quantileUni_lda_1000.csv	logistic_l1_1	0.0439560439560439	0.0	0.0439560439560439	0.0439560439560439	0.0109890109890109	0.0	0.0109890109890109	0.0109890109890109	0.1025825062144043
mee-type_smote_quantileUni_lda_1000.csv	logistic_l1_2	0.0439560439560439	0.0	0.0439560439560439	0.0439560439560439	0.0109890109890109	0.0	0.0109890109890109	0.0109890109890109	0.1020688395686661
mee-type_smote_quantileUni_lda_1000.csv	logistic_l1_3	0.0	0.0	0.0	0.0	0.0	0.0	0.0	0.0	0.1076668577127996
mee-type_smote_quantileUni_lda_1000.csv	logistic_l2_balanced_1	0.0439560439560439	0.0	0.0439560439560439	0.0439560439560439	0.0109890109890109	0.0	0.0109890109890109	0.0109890109890109	0.102250142973965
mee-type_smote_quantileUni_lda_1000.csv	logistic_l1_balanced_1	0.0439560439560439	0.0	0.0439560439560439	0.0439560439560439	0.0109890109890109	0.0	0.0109890109890109	0.0109890109890109	0.1025825071459388
mee-type_smote_quantileUni_lda_1000.csv	rf_100_10	0.3824175824175824	0.0049144351153841	0.3763155052633015	0.3885196595718633	0.3558063558063558	0.0229851655641229	0.3272665032326313	0.3843462083800802	0.062956842002371
mee-type_smote_quantileUni_lda_1000.csv	rf_100_20	0.3758241758241758	0.0091940662256491	0.364408234794686	0.3872401168536656	0.343985743985744	0.0228112373048805	0.3156618518697911	0.3723096361016969	0.0646934088546281
mee-type_smote_quantileUni_lda_1000.csv	rf_200_10	0.3802197802197802	0.0060189292033534	0.3727462925202389	0.3876932679193215	0.3503118503118503	0.0274725274725274	0.316200202009549	0.3844234986141515	0.063228421728763
mee-type_smote_quantileUni_lda_1000.csv	rf_200_20	0.3846153846153846	0.0	0.3846153846153846	0.3846153846153846	0.3539748539748539	0.0138880502638306	0.336730561957011	0.3712191459926968	0.0646588783178106
mee-type_smote_quantileUni_lda_1000.csv	rf_bal_100_10	0.3824175824175824	0.0049144351153841	0.3763155052633015	0.3885196595718633	0.3613008613008612	0.0245721755769207	0.3307904755294569	0.3918112470722656	0.0640459516591336
mee-type_smote_quantileUni_lda_1000.csv	rf_bal_200_20	0.3846153846153846	0.0	0.3846153846153846	0.3846153846153846	0.3613008613008613	0.0150473230083836	0.3426171420520081	0.3799845805497145	0.0647286455489359
mee-type_smote_quantileUni_lda_1000.csv	decision_tree	0.3406593406593406	0.0	0.3406593406593406	0.3406593406593406	0.2825623988414686	0.0029524707088548	0.2788964222565324	0.2862283754264049	0.0775694893341952
mee-type_smote_quantileUni_lda_1000.csv	decision_tree_bal	0.3406593406593406	0.0	0.3406593406593406	0.3406593406593406	0.2825623988414686	0.0029524707088548	0.2788964222565324	0.2862283754264049	0.0775694893341952
mee-type_smote_quantileUni_lda_1000.csv	extra_tree	0.3406593406593406	0.013458734850457	0.3239481141341578	0.3573705671845235	0.3163388898683016	0.0027765410828641	0.3128913587661755	0.3197864209704277	0.0638071622495151
mee-type_smote_quantileUni_lda_1000.csv	extra_tree_bal	0.3296703296703296	0.029074190231479	0.2935699543829745	0.3657707049576848	0.3005706968748765	0.0228178643839854	0.2722385761533857	0.3289028175963672	0.0621283775048481
mee-type_smote_quantileUni_lda_1000.csv	lda	0.0439560439560439	0.0	0.0439560439560439	0.0439560439560439	0.0109890109890109	0.0	0.0109890109890109	0.0109890109890109	0.1059456376375824
mee-type_smote_quantileUni_lda_1000.csv	gaussian_nb	0.3604395604395604	0.0180567876100604	0.3380190973409366	0.3828600235381842	0.3090982616014709	0.0031773704254117	0.3051530351352797	0.3130434880676621	0.0731189732200764
mee-type_smote_quantileUni_lda_1000.csv	svm_rbf_1	0.0087912087912087	0.0120378584067069	-0.0061557666078737	0.0237381841902913	0.0192307692307692	0.0263328152646714	-0.0134657394547238	0.0519272779162623	0.0813855500048192
mee-type_smote_quantileUni_lda_1000.csv	svm_rbf_2	0.1978021978021978	0.0527014453111287	0.1323647105060645	0.2632396850983311	0.194995864350703	0.0256509251081414	0.1631460341233027	0.2268456945781033	0.0587104627716086
mee-type_smote_quantileUni_lda_1000.csv	svm_rbf_3	0.0	0.0	0.0	0.0	0.0	0.0	0.0	0.0	0.078788939676403
mee-type_smote_quantileUni_lda_1000.csv	svm_rbf_auto	0.3736263736263736	0.0	0.3736263736263736	0.3736263736263736	0.1469317199654278	0.0	0.1469317199654278	0.1469317199654278	0.049272706376245
mee-type_smote_quantileUni_lda_1000.csv	svm_rbf_bal	0.0087912087912087	0.0120378584067069	-0.0061557666078737	0.0237381841902913	0.0192307692307692	0.0263328152646714	-0.0134657394547238	0.0519272779162623	0.0813185562360983
mee-type_smote_quantileUni_lda_1000.csv	svm_linear_bal	0.0439560439560439	0.0	0.0439560439560439	0.0439560439560439	0.0109890109890109	0.0	0.0109890109890109	0.0109890109890109	0.0927722445111384
mee-type_smote_quantileUni_lda_1000.csv	svm_sigmoid	0.1274725274725274	0.0098288702307683	0.1152683731639657	0.1396766817810892	0.038457802475829	0.0034415072478401	0.0341846068266286	0.0427309981250294	0.0693673861011095
mee-type_smote_quantileUni_lda_1000.csv	svm_sigmoid_bal	0.1274725274725274	0.0098288702307683	0.1152683731639657	0.1396766817810892	0.038457802475829	0.0034415072478401	0.0341846068266286	0.0427309981250294	0.0689854991057555
mee-type_smote_quantileUni_lda_1000.csv	svm_poly_3	0.0549450549450549	7.757919228897728e-18	0.0549450549450549	0.0549450549450549	0.0358974358974358	0.0111104402110645	0.0221020022831615	0.0496928695117101	0.0961837992280825
mee-type_smote_quantileUni_lda_1000.csv	svm_poly_4	0.0109890109890109	0.0	0.0109890109890109	0.0109890109890109	0.0117216117216117	0.0040126194689023	0.0067392865885841	0.0167039368546392	0.087655332812122
mee-type_smote_quantileUni_lda_1000.csv	mlp_50_lr0.001	0.24395604395604398	0.04067418796334449	0.19345236910578614	0.2944597188063018	0.38032170727822906	0.03916092621881332	0.3316969950560146	0.42894641950044354	0.08302637852529995
mee-type_smote_quantileUni_lda_1000.csv	mlp_100_lr0.001	0.2571428571428571	0.022787298190470023	0.22884868936341665	0.28543702492229756	0.3252936276808956	0.04234154534845715	0.2727196551934042	0.377867600168387	0.08418230827541513
mee-type_smote_quantileUni_lda_1000.csv	mlp_50x2_lr0.001	0.27912087912087913	0.10895204006985001	0.14383905343529219	0.41440270480646607	0.3608370663522439	0.06744381528637336	0.2770945090096492	0.44457962369483855	0.08157066095316286
mee-type_smote_quantileUni_lda_1000.csv	mlp_128_64	0.3604395604395604	0.06747288541981869	0.27666090775884367	0.4442182131202771	0.356953581432573	0.044753771400276456	0.30138443470100834	0.41252272816413765	0.07310687370684357
mee-type_smote_quantileUni_lda_1000.csv	mlp_128_64_es	0.22857142857142856	0.06611696244611572	0.14647637663149626	0.31066648051136087	0.3225767821921668	0.06716675029618818	0.23917824647304775	0.4059753179112858	0.08649052207690289
mee-type_smote_quantileUni_lda_1000.csv	mlp_128_64_alpha	0.22857142857142856	0.08631796433694716	0.12139351985600463	0.3357493372868525	0.3640374609948646	0.05924277451724206	0.2904778407231016	0.4375970812666276	0.08802075854173405
mee-type_smote_quantileUni_lda_1000.csv	logistic_l2_1	0.04395604395604396	0.0	0.04395604395604396	0.04395604395604396	0.01098901098901099	0.0	0.01098901098901099	0.01098901098901099	0.10225026470477358
mee-type_smote_quantileUni_lda_1000.csv	logistic_l2_2	0.04395604395604396	0.0	0.04395604395604396	0.04395604395604396	0.01098901098901099	0.0	0.01098901098901099	0.01098901098901099	0.10040938844023742
mee-type_smote_quantileUni_lda_1000.csv	logistic_l2_3	0.03296703296703297	0.00777040418886316	0.02331880183422984	0.0426152640998361	0.008728414442700155	0.001667305249274946	0.006658181540659298	0.010798647344741012	0.10359852836318292
mee-type_smote_quantileUni_lda_1000.csv	logistic_l1_1	0.04395604395604396	0.0	0.04395604395604396	0.04395604395604396	0.01098901098901099	0.0	0.01098901098901099	0.01098901098901099	0.10258250621440439
mee-type_smote_quantileUni_lda_1000.csv	logistic_l1_2	0.04395604395604396	0.0	0.04395604395604396	0.04395604395604396	0.01098901098901099	0.0	0.01098901098901099	0.01098901098901099	0.10206883956866612
mee-type_smote_quantileUni_lda_1000.csv	logistic_l1_3	0.0	0.0	0.0	0.0	0.0	0.0	0.0	0.0	0.10766685771279967
mee-type_smote_quantileUni_lda_1000.csv	logistic_l2_balanced_1	0.04395604395604396	0.0	0.04395604395604396	0.04395604395604396	0.01098901098901099	0.0	0.01098901098901099	0.01098901098901099	0.10225014297396509
mee-type_smote_quantileUni_lda_1000.csv	logistic_l1_balanced_1	0.04395604395604396	0.0	0.04395604395604396	0.04395604395604396	0.01098901098901099	0.0	0.01098901098901099	0.01098901098901099	0.10258250714593889
mee-type_smote_quantileUni_lda_1000.csv	rf_100_10	0.3824175824175824	0.0049144351153841605	0.3763155052633015	0.3885196595718633	0.3558063558063558	0.022985165564122945	0.32726650323263135	0.3843462083800802	0.062956842002371
mee-type_smote_quantileUni_lda_1000.csv	rf_100_20	0.3758241758241758	0.009194066225649195	0.36440823479468604	0.3872401168536656	0.343985743985744	0.022811237304880543	0.3156618518697911	0.3723096361016969	0.06469340885462818
mee-type_smote_quantileUni_lda_1000.csv	rf_200_10	0.3802197802197802	0.006018929203353483	0.3727462925202389	0.3876932679193215	0.3503118503118503	0.027472527472527458	0.31620020200954907	0.38442349861415154	0.06322842172876303
mee-type_smote_quantileUni_lda_1000.csv	rf_200_20	0.38461538461538464	0.0	0.38461538461538464	0.38461538461538464	0.35397485397485395	0.013888050263830677	0.33673056195701107	0.37121914599269684	0.06465887831781064
mee-type_smote_quantileUni_lda_1000.csv	rf_bal_100_10	0.3824175824175824	0.0049144351153841605	0.3763155052633015	0.3885196595718633	0.36130086130086125	0.024572175576920756	0.3307904755294569	0.3918112470722656	0.06404595165913367
mee-type_smote_quantileUni_lda_1000.csv	rf_bal_200_20	0.38461538461538464	0.0	0.38461538461538464	0.38461538461538464	0.3613008613008613	0.015047323008383691	0.3426171420520081	0.3799845805497145	0.06472864554893591
mee-type_smote_quantileUni_lda_1000.csv	decision_tree	0.34065934065934067	0.0	0.34065934065934067	0.34065934065934067	0.28256239884146866	0.002952470708854848	0.27889642225653244	0.2862283754264049	0.07756948933419522
mee-type_smote_quantileUni_lda_1000.csv	decision_tree_bal	0.34065934065934067	0.0	0.34065934065934067	0.34065934065934067	0.28256239884146866	0.002952470708854848	0.27889642225653244	0.2862283754264049	0.07756948933419522
mee-type_smote_quantileUni_lda_1000.csv	extra_tree	0.34065934065934067	0.013458734850457019	0.32394811413415786	0.3573705671845235	0.3163388898683016	0.00277654108286415	0.3128913587661755	0.3197864209704277	0.06380716224951519
mee-type_smote_quantileUni_lda_1000.csv	extra_tree_bal	0.32967032967032966	0.029074190231479023	0.2935699543829745	0.3657707049576848	0.3005706968748765	0.02281786438398544	0.27223857615338576	0.3289028175963672	0.0621283775048481
mee-type_smote_quantileUni_lda_1000.csv	lda	0.04395604395604396	0.0	0.04395604395604396	0.04395604395604396	0.01098901098901099	0.0	0.01098901098901099	0.01098901098901099	0.10594563763758244
mee-type_smote_quantileUni_lda_1000.csv	gaussian_nb	0.36043956043956044	0.018056787610060424	0.3380190973409366	0.38286002353818427	0.3090982616014709	0.003177370425411787	0.3051530351352797	0.31304348806766213	0.0731189732200764
mee-type_smote_quantileUni_lda_1000.csv	svm_rbf_1	0.008791208791208791	0.012037858406706948	-0.006155766607873779	0.02373818419029136	0.019230769230769232	0.02633281526467145	-0.013465739454723895	0.05192727791626236	0.08138555000481924
mee-type_smote_quantileUni_lda_1000.csv	svm_rbf_2	0.19780219780219782	0.052701445311128775	0.13236471050606452	0.2632396850983311	0.19499586435070304	0.025650925108141445	0.16314603412330275	0.22684569457810333	0.05871046277160863
mee-type_smote_quantileUni_lda_1000.csv	svm_rbf_3	0.0	0.0	0.0	0.0	0.0	0.0	0.0	0.0	0.07878893967640309
mee-type_smote_quantileUni_lda_1000.csv	svm_rbf_auto	0.37362637362637363	0.0	0.37362637362637363	0.37362637362637363	0.14693171996542784	0.0	0.14693171996542784	0.14693171996542784	0.049272706376245055
mee-type_smote_quantileUni_lda_1000.csv	svm_rbf_bal	0.008791208791208791	0.012037858406706948	-0.006155766607873779	0.02373818419029136	0.019230769230769232	0.02633281526467145	-0.013465739454723895	0.05192727791626236	0.08131855623609835
mee-type_smote_quantileUni_lda_1000.csv	svm_linear_bal	0.04395604395604396	0.0	0.04395604395604396	0.04395604395604396	0.01098901098901099	0.0	0.01098901098901099	0.01098901098901099	0.09277224451113841
mee-type_smote_quantileUni_lda_1000.csv	svm_sigmoid	0.12747252747252746	0.009828870230768307	0.11526837316396571	0.13967668178108922	0.03845780247582904	0.003441507247840143	0.03418460682662861	0.04273099812502947	0.06936738610110957
mee-type_smote_quantileUni_lda_1000.csv	svm_sigmoid_bal	0.12747252747252746	0.009828870230768307	0.11526837316396571	0.13967668178108922	0.03845780247582904	0.003441507247840143	0.03418460682662861	0.04273099812502947	0.06898549910575551
mee-type_smote_quantileUni_lda_1000.csv	svm_poly_3	0.05494505494505495	7.757919228897728e-18	0.054945054945054944	0.05494505494505496	0.035897435897435895	0.011110440211064544	0.022102002283161594	0.049692869511710196	0.09618379922808258
mee-type_smote_quantileUni_lda_1000.csv	svm_poly_4	0.01098901098901099	0.0	0.01098901098901099	0.01098901098901099	0.011721611721611722	0.004012619468902316	0.0067392865885841985	0.016703936854639244	0.08765533281212208
mee-type_gan_quantileUni_lda_10000.csv	mlp_50_lr0.001	0.0131868131868131	0.0091940662256491	0.0017708721573234	0.0246027542163029	0.0829928363918511	0.1690981347826424	-0.126970229731164	0.2929559025148664	0.1023841828299901
mee-type_gan_quantileUni_lda_10000.csv	mlp_100_lr0.001	0.0175824175824175	0.0199625298072362	-0.0072043369922971	0.0423691721571323	0.1321345321345321	0.1780193431513592	-0.0889056772403928	0.3531747415094571	0.0995437886281102
mee-type_gan_quantileUni_lda_10000.csv	mlp_50x2_lr0.001	0.0065934065934065	0.0060189292033534	-0.0008800811061346	0.0140668942929478	0.0005353620738236	0.0004895618583796	-7.250926062013963e-05	0.0011432334082673	0.1032032906641082
mee-type_gan_quantileUni_lda_10000.csv	mlp_128_64	0.0021978021978021	0.0049144351153841	-0.0039042749564786	0.008299879352083	0.0054945054945054	0.0122860877884603	-0.0097606873911966	0.0207496983802076	0.1051401998241075
mee-type_gan_quantileUni_lda_10000.csv	mlp_128_64_es	0.0131868131868131	0.0180567876100604	-0.0092336499118106	0.035607276285437	0.1058168498168498	0.167939139540158	-0.102707133639483	0.3143408332731826	0.1009356378088373
mee-type_gan_quantileUni_lda_10000.csv	mlp_128_64_alpha	0.0	0.0	0.0	0.0	0.0	0.0	0.0	0.0	0.1074145751966413
mee-type_gan_quantileUni_lda_10000.csv	mlp_50_lr0.001	0.0131868131868131	0.0091940662256491	0.0017708721573234	0.0246027542163029	0.0829928363918511	0.1690981347826424	-0.126970229731164	0.2929559025148664	0.1023841828299901
mee-type_gan_quantileUni_lda_10000.csv	mlp_100_lr0.001	0.0175824175824175	0.0199625298072362	-0.0072043369922971	0.0423691721571323	0.1321345321345321	0.1780193431513592	-0.0889056772403928	0.3531747415094571	0.0995437886281102
mee-type_gan_quantileUni_lda_10000.csv	mlp_50x2_lr0.001	0.0065934065934065	0.0060189292033534	-0.0008800811061346	0.0140668942929478	0.0005353620738236	0.0004895618583796	-7.250926062013963e-05	0.0011432334082673	0.1032032906641082
mee-type_gan_quantileUni_lda_10000.csv	mlp_128_64	0.0021978021978021	0.0049144351153841	-0.0039042749564786	0.008299879352083	0.0054945054945054	0.0122860877884603	-0.0097606873911966	0.0207496983802076	0.1051401998241075
mee-type_gan_quantileUni_lda_10000.csv	mlp_128_64_es	0.0131868131868131	0.0180567876100604	-0.0092336499118106	0.035607276285437	0.1058168498168498	0.167939139540158	-0.102707133639483	0.3143408332731826	0.1009356378088373
mee-type_gan_quantileUni_lda_10000.csv	mlp_128_64_alpha	0.0	0.0	0.0	0.0	0.0	0.0	0.0	0.0	0.1074145751966413
mee-type_gan_quantileUni_lda_10000.csv	logistic_l2_1	0.37142857142857144	0.0049144351153841605	0.36532649427429054	0.37753064858285235	0.3186210131332083	0.0007341686605299581	0.31770942233881877	0.3195326039275978	0.05153914338284158
mee-type_gan_quantileUni_lda_10000.csv	logistic_l2_2	0.37142857142857144	0.0049144351153841605	0.36532649427429054	0.37753064858285235	0.3186210131332083	0.0007341686605299581	0.31770942233881877	0.3195326039275978	0.05153978040007702
mee-type_gan_quantileUni_lda_10000.csv	logistic_l2_3	0.37142857142857144	0.0049144351153841605	0.36532649427429054	0.37753064858285235	0.3186210131332083	0.0007341686605299581	0.31770942233881877	0.3195326039275978	0.05153909441885555
mee-type_gan_quantileUni_lda_10000.csv	logistic_l1_1	0.37142857142857144	0.0049144351153841605	0.36532649427429054	0.37753064858285235	0.3186210131332083	0.0007341686605299581	0.31770942233881877	0.3195326039275978	0.051539920840593854
mee-type_gan_quantileUni_lda_10000.csv	logistic_l1_2	0.37142857142857144	0.0049144351153841605	0.36532649427429054	0.37753064858285235	0.3186210131332083	0.0007341686605299581	0.31770942233881877	0.3195326039275978	0.051547451410794455
mee-type_gan_quantileUni_lda_10000.csv	logistic_l1_3	0.37142857142857144	0.0049144351153841605	0.36532649427429054	0.37753064858285235	0.3186210131332083	0.0007341686605299581	0.31770942233881877	0.3195326039275978	0.051539166213078136
mee-type_gan_quantileUni_lda_10000.csv	logistic_l2_balanced_1	0.37142857142857144	0.0049144351153841605	0.36532649427429054	0.37753064858285235	0.3186210131332083	0.0007341686605299581	0.31770942233881877	0.3195326039275978	0.051539086868465867
mee-type_gan_quantileUni_lda_10000.csv	logistic_l1_balanced_1	0.37142857142857144	0.0049144351153841605	0.36532649427429054	0.37753064858285235	0.3186210131332083	0.0007341686605299581	0.31770942233881877	0.3195326039275978	0.05153991000903187
mee-type_gan_quantileUni_lda_10000.csv	rf_100_10	0.01098901098901099	0.0	0.01098901098901099	0.01098901098901099	0.0009324009324009324	3.7230569055940554e-05	0.0008861730751715318	0.000978628789630333	0.08653593674958707
mee-type_gan_quantileUni_lda_10000.csv	rf_100_20	0.0	0.0	0.0	0.0	0.0	0.0	0.0	0.0	0.0935561031071106
mee-type_gan_quantileUni_lda_10000.csv	rf_200_10	0.01098901098901099	0.0	0.01098901098901099	0.01098901098901099	0.0009157509157509158	0.0	0.0009157509157509158	0.0009157509157509158	0.08657724855394341
mee-type_gan_quantileUni_lda_10000.csv	rf_200_20	0.0	0.0	0.0	0.0	0.0	0.0	0.0	0.0	0.09334850601599168
mee-type_gan_quantileUni_lda_10000.csv	rf_bal_100_10	0.008791208791208791	0.004914435115384154	0.002689131636927915	0.014893285945489668	0.000740563784042045	0.0004143465755931739	0.00022608455834898552	0.0012550430097351046	0.08654555327500084
mee-type_gan_quantileUni_lda_10000.csv	rf_bal_200_20	0.0	0.0	0.0	0.0	0.0	0.0	0.0	0.0	0.09322960998161985
mee-type_gan_quantileUni_lda_10000.csv	decision_tree	0.0	0.0	0.0	0.0	0.0	0.0	0.0	0.0	0.11764705882352941
mee-type_gan_quantileUni_lda_10000.csv	decision_tree_bal	0.0	0.0	0.0	0.0	0.0	0.0	0.0	0.0	0.11764705882352941
mee-type_gan_quantileUni_lda_10000.csv	extra_tree	0.008791208791208791	0.004914435115384154	0.002689131636927915	0.014893285945489668	0.0006719979247451775	0.00037879797677088455	0.00020165811439634354	0.0011423377350940115	0.09274973497091146
mee-type_gan_quantileUni_lda_10000.csv	extra_tree_bal	0.01098901098901099	0.0	0.01098901098901099	0.01098901098901099	0.0008588334742180896	1.8519782164164505e-05	0.0008358381274502704	0.0008818288209859089	0.09231007110536522
mee-type_gan_quantileUni_lda_10000.csv	lda	0.36483516483516487	0.009194066225649175	0.3534192238056751	0.37625110586465466	0.31761918506759035	0.001403871008873376	0.3158760489777503	0.3193623211574304	0.05165202053606718
mee-type_gan_quantileUni_lda_10000.csv	gaussian_nb	0.02197802197802198	0.0	0.02197802197802198	0.02197802197802198	0.002055087769373483	5.211194115457536e-05	0.0019903822481653335	0.0021197932905816326	0.09219104647293751
mee-type_gan_quantileUni_lda_10000.csv	mlp_50_lr0.001	0.013186813186813187	0.009194066225649182	0.0017708721573234092	0.024602754216302966	0.08299283639185116	0.16909813478264246	-0.12697022973116406	0.2929559025148664	0.1023841828299901
mee-type_gan_quantileUni_lda_10000.csv	mlp_100_lr0.001	0.017582417582417582	0.019962529807236208	-0.007204336992297191	0.04236917215713236	0.13213453213453213	0.1780193431513592	-0.08890567724039283	0.3531747415094571	0.0995437886281102
mee-type_gan_quantileUni_lda_10000.csv	mlp_50x2_lr0.001	0.006593406593406593	0.006018929203353474	-0.0008800811061346918	0.014066894292947878	0.0005353620738236123	0.0004895618583796577	-7.250926062013963e-05	0.0011432334082673644	0.1032032906641082
mee-type_gan_quantileUni_lda_10000.csv	mlp_128_64	0.002197802197802198	0.004914435115384153	-0.0039042749564786776	0.008299879352083074	0.005494505494505494	0.012286087788460381	-0.009760687391196695	0.020749698380207682	0.10514019982410758
mee-type_gan_quantileUni_lda_10000.csv	mlp_128_64_es	0.013186813186813187	0.01805678761006042	-0.009233649911810667	0.03560727628543704	0.10581684981684983	0.167939139540158	-0.102707133639483	0.31434083327318263	0.1009356378088373
mee-type_gan_quantileUni_lda_10000.csv	mlp_128_64_alpha	0.0	0.0	0.0	0.0	0.0	0.0	0.0	0.0	0.1074145751966413
mee-type_gan_quantileUni_lda_1000.csv	logistic_l2_1	0.3142857142857143	0.15317751087211273	0.12409071370134589	0.5044807148700827	0.3982140874998018	0.056007936929251684	0.32867104860108276	0.46775712639852085	0.05509950887407992
mee-type_gan_quantileUni_lda_1000.csv	logistic_l2_2	0.31648351648351647	0.15392462676829125	0.12536084898837746	0.5076061839786554	0.3985193378050521	0.05606410295408703	0.3289065595753728	0.4681321160347314	0.05509538916679494
mee-type_gan_quantileUni_lda_1000.csv	logistic_l2_3	0.3142857142857143	0.15317751087211273	0.12409071370134589	0.5044807148700827	0.3982140874998018	0.056007936929251684	0.32867104860108276	0.46775712639852085	0.05509988782542895
mee-type_gan_quantileUni_lda_1000.csv	logistic_l1_1	0.3142857142857143	0.15317751087211273	0.12409071370134589	0.5044807148700827	0.3982140874998018	0.056007936929251684	0.32867104860108276	0.46775712639852085	0.05510141545752774
mee-type_gan_quantileUni_lda_1000.csv	logistic_l1_2	0.3142857142857143	0.15317751087211273	0.12409071370134589	0.5044807148700827	0.3982140874998018	0.056007936929251684	0.32867104860108276	0.46775712639852085	0.05511444471246361
mee-type_gan_quantileUni_lda_1000.csv	logistic_l1_3	0.3142857142857143	0.15317751087211273	0.12409071370134589	0.5044807148700827	0.3982140874998018	0.056007936929251684	0.32867104860108276	0.46775712639852085	0.0551001054612406
mee-type_gan_quantileUni_lda_1000.csv	logistic_l2_balanced_1	0.3142857142857143	0.15317751087211273	0.12409071370134589	0.5044807148700827	0.3982140874998018	0.056007936929251684	0.32867104860108276	0.46775712639852085	0.055099572045814116
mee-type_gan_quantileUni_lda_1000.csv	logistic_l1_balanced_1	0.3142857142857143	0.15317751087211273	0.12409071370134589	0.5044807148700827	0.3982140874998018	0.056007936929251684	0.32867104860108276	0.46775712639852085	0.055101406768821734
mee-type_gan_quantileUni_lda_1000.csv	rf_100_10	0.035164835164835165	0.009194066225649182	0.023748894135345387	0.04658077619432494	0.13420289368407745	0.036228013029880476	0.08921987417841791	0.17918591318973698	0.07478499517701653
mee-type_gan_quantileUni_lda_1000.csv	rf_100_20	0.07472527472527472	0.05235661208602899	0.009715954430132318	0.13973459502041713	0.20659369615891351	0.07399204370404111	0.114720439338086	0.298466952979741	0.07726422305615116
mee-type_gan_quantileUni_lda_1000.csv	rf_200_10	0.03736263736263737	0.009828870230768307	0.025158483054075614	0.04956679167119912	0.15839464044727203	0.016889302662429585	0.13742380137656618	0.17936547951797788	0.07443186456427192
mee-type_gan_quantileUni_lda_1000.csv	rf_200_20	0.07252747252747252	0.02969067271671713	0.03566163313267404	0.109393311922271	0.22738356881214025	0.04751201881139251	0.16838960557205407	0.28637753205222644	0.0762618119359233
mee-type_gan_quantileUni_lda_1000.csv	rf_bal_100_10	0.04175824175824176	0.0049144351153841545	0.035656164603960885	0.04786031891252264	0.1590588892419556	0.016278059354998875	0.13884700898022947	0.17927076950368173	0.07448754223260826
mee-type_gan_quantileUni_lda_1000.csv	rf_bal_200_20	0.07472527472527472	0.03838296526719336	0.027066528608695115	0.12238402084185433	0.22074091322211623	0.051457609977739356	0.15684785147914634	0.28463397496508613	0.07691337995793751
mee-type_gan_quantileUni_lda_1000.csv	decision_tree	0.05494505494505495	0.06547458949347794	-0.026352385626167187	0.1362424955162771	0.17010425471963933	0.19907064916804082	-0.07707460345136954	0.41728311289064823	0.11118293471234648
mee-type_gan_quantileUni_lda_1000.csv	decision_tree_bal	0.035164835164835165	0.05461438962544694	-0.03264788621695558	0.10297755654662591	0.10197238658777122	0.16050219417700834	-0.09731740955453025	0.30126218273007266	0.11351001939237233
mee-type_gan_quantileUni_lda_1000.csv	extra_tree	0.006593406593406593	0.006018929203353474	-0.0008800811061346918	0.014066894292947878	0.0009427171988748344	0.0008614945372065279	-0.0001269695526237265	0.0020124039503733953	0.07959376858435682
mee-type_gan_quantileUni_lda_1000.csv	extra_tree_bal	0.002197802197802198	0.004914435115384153	-0.0039042749564786776	0.008299879352083074	0.00031397174254317107	0.0007020621593405933	-0.0005577535652112397	0.001185697050297582	0.07847782805429865
mee-type_gan_quantileUni_lda_1000.csv	lda	0.3318681318681319	0.16399050988532163	0.12824701969644917	0.5354892440398147	0.40382355739498593	0.058474977220807106	0.3312172833841244	0.4764298314058475	0.05514685133568309
mee-type_gan_quantileUni_lda_1000.csv	gaussian_nb	0.03296703296703297	0.0	0.03296703296703297	0.03296703296703297	0.0011888116081894679	1.199283254024888e-05	0.0011739205397877542	0.0012037026765911816	0.08699158131209529
mee-type_gan_quantileUni_lda_1000.csv	svm_rbf_1	0.019780219780219783	0.012037858406706948	0.0048332443811372125	0.03472719517930235	0.00180855689161337	0.0010548089319692055	0.0004988386158034414	0.0031182751674232985	0.07623614650448046
mee-type_gan_quantileUni_lda_1000.csv	svm_rbf_2	0.002197802197802198	0.004914435115384153	-0.0039042749564786776	0.008299879352083074	0.00018704699555763385	0.0004182497970539705	-0.00033227871970031305	0.0007063727108155807	0.07822700673234818
mee-type_gan_quantileUni_lda_1000.csv	svm_rbf_3	0.03296703296703297	0.0	0.03296703296703297	0.03296703296703297	0.0017982017982017984	2.42434975903054e-19	0.0017982017982017982	0.0017982017982017986	0.07205495246427832
mee-type_gan_quantileUni_lda_1000.csv	svm_rbf_auto	0.03296703296703297	0.0	0.03296703296703297	0.03296703296703297	0.0015457756529185097	2.913430544558939e-05	0.0015096006347340494	0.00158195067110297	0.06808752961500943
mee-type_gan_quantileUni_lda_1000.csv	svm_rbf_bal	0.019780219780219783	0.012037858406706948	0.0048332443811372125	0.03472719517930235	0.00180855689161337	0.0010548089319692055	0.0004988386158034414	0.0031182751674232985	0.07575842904970785
mee-type_gan_quantileUni_lda_1000.csv	svm_linear_bal	0.13406593406593406	0.03146773860060737	0.09499357594067293	0.1731382921911952	0.4395604395604396	6.206335383118183e-17	0.43956043956043955	0.43956043956043966	0.055844422731668744
mee-type_gan_quantileUni_lda_1000.csv	svm_sigmoid	0.002197802197802198	0.004914435115384153	-0.0039042749564786776	0.008299879352083074	0.008791208791208791	0.01965774046153661	-0.01561709982591471	0.033199517408332296	0.05275086986424558
mee-type_gan_quantileUni_lda_1000.csv	svm_sigmoid_bal	0.002197802197802198	0.004914435115384153	-0.0039042749564786776	0.008299879352083074	0.008791208791208791	0.01965774046153661	-0.01561709982591471	0.033199517408332296	0.05211250702259059
mee-type_gan_quantileUni_lda_1000.csv	svm_poly_3	0.25054945054945055	0.052356612086029	0.18554013025430816	0.31555877084459294	0.4074259074259074	0.0027199982105735386	0.40404858357265955	0.41080323127915525	0.058705068272698134
mee-type_gan_quantileUni_lda_1000.csv	svm_poly_4	0.046153846153846156	0.01629933733427618	0.025915545791296873	0.06639214651639544	0.248974358974359	0.03789784022063988	0.20191797516271176	0.2960307427860062	0.09597157964841237
mee-type_gan_quantileUni_lda_1000.csv	mlp_50_lr0.001	0.1846153846153846	0.04490728954220341	0.12885561993391811	0.24037514929685108	0.42325006925847264	0.007670134212022752	0.41372633974601297	0.4327737987709323	0.07460989453821751
mee-type_gan_quantileUni_lda_1000.csv	mlp_100_lr0.001	0.1956043956043956	0.02736241669887633	0.16162946788555133	0.22957932332323988	0.42908203518093624	0.005123934271526684	0.4227198304668191	0.4354442398950534	0.07531487107302684
mee-type_gan_quantileUni_lda_1000.csv	mlp_50x2_lr0.001	0.2197802197802198	0.0677408132194393	0.13566889079659625	0.3038915487638434	0.40846153846153843	0.03268099351730461	0.3678827253855706	0.44904035153750627	0.07816639516040298
mee-type_gan_quantileUni_lda_1000.csv	mlp_128_64	0.1934065934065934	0.032598674668552374	0.15292999268149482	0.233883194131692	0.39384615384615385	0.020640627484613448	0.3682174297981742	0.4194748778941335	0.08167525755554329
mee-type_gan_quantileUni_lda_1000.csv	mlp_128_64_es	0.22637362637362637	0.08708401211498439	0.11824454371130963	0.33450270903594315	0.434552992794751	0.008723150899848844	0.42372177037150993	0.4453842152179921	0.07639956819869911
mee-type_gan_quantileUni_lda_1000.csv	mlp_128_64_alpha	0.21758241758241761	0.08631796433694716	0.11040450886699368	0.3247603262978416	0.4200466200466201	0.03415534921318464	0.3776371525825314	0.46245608751070877	0.07903865568925487
mee-type_gan_quantileUni_lda_100.csv	logistic_l2_1	0.46153846153846156	0.0	0.46153846153846156	0.46153846153846156	0.3296831402119838	0.010136816684316676	0.3170966198786765	0.3422696605452911	0.040889317517534426
mee-type_gan_quantileUni_lda_100.csv	logistic_l2_2	0.46153846153846156	0.0	0.46153846153846156	0.46153846153846156	0.32974161974414756	0.009504206091844386	0.31794058920839546	0.34154265027989966	0.040676571566472024
mee-type_gan_quantileUni_lda_100.csv	logistic_l2_3	0.46153846153846156	0.0	0.46153846153846156	0.46153846153846156	0.3296831402119838	0.010136816684316676	0.3170966198786765	0.3422696605452911	0.040912520454813625
mee-type_gan_quantileUni_lda_100.csv	logistic_l1_1	0.46153846153846156	0.0	0.46153846153846156	0.46153846153846156	0.3296831402119838	0.010136816684316676	0.3170966198786765	0.3422696605452911	0.04091987663702228
mee-type_gan_quantileUni_lda_100.csv	logistic_l1_2	0.46153846153846156	0.0	0.46153846153846156	0.46153846153846156	0.3263669936270466	0.014825270884902222	0.307958988505645	0.34477499874844814	0.04099325982346784
mee-type_gan_quantileUni_lda_100.csv	logistic_l1_3	0.46153846153846156	0.0	0.46153846153846156	0.46153846153846156	0.3296831402119838	0.010136816684316676	0.3170966198786765	0.3422696605452911	0.04091918191876502
mee-type_gan_quantileUni_lda_100.csv	logistic_l2_balanced_1	0.46153846153846156	0.0	0.46153846153846156	0.46153846153846156	0.3296831402119838	0.010136816684316676	0.3170966198786765	0.3422696605452911	0.04088933548159665
mee-type_gan_quantileUni_lda_100.csv	logistic_l1_balanced_1	0.46153846153846156	0.0	0.46153846153846156	0.46153846153846156	0.3296831402119838	0.010136816684316676	0.3170966198786765	0.3422696605452911	0.04091973218743768
mee-type_gan_quantileUni_lda_100.csv	rf_100_10	0.048351648351648346	0.030690637458832836	0.01024418873709168	0.08645910796620501	0.28614750633981406	0.22794919675877084	0.0031111953049816066	0.5691838173746465	0.06898008825767496
mee-type_gan_quantileUni_lda_100.csv	rf_100_20	0.07252747252747253	0.03351197952082837	0.030916854047918038	0.11413809100702703	0.44536846176597733	0.03319204754212994	0.40415509130624677	0.4865818322257079	0.07026948771816419
mee-type_gan_quantileUni_lda_100.csv	rf_200_10	0.05494505494505495	0.013458734850457022	0.038233828419872114	0.07165628147023778	0.34401633563124245	0.16443853792141216	0.13983892317696017	0.5481937480855248	0.06928026061686404
mee-type_gan_quantileUni_lda_100.csv	rf_200_20	0.05714285714285714	0.03677626490259672	0.011479093024898045	0.10280662126081624	0.3547226582940869	0.18344861031203125	0.12694112334912547	0.5825041932390483	0.07028078551567148
mee-type_gan_quantileUni_lda_100.csv	rf_bal_100_10	0.035164835164835165	0.01629933733427618	0.014926534802285882	0.05540313552738445	0.1811355311355311	0.1910195827499775	-0.05604660771702119	0.4183176699880834	0.06993291394783814
mee-type_gan_quantileUni_lda_100.csv	rf_bal_200_20	0.05274725274725275	0.012037858406706948	0.03780027734817018	0.06769422814633531	0.33320251177394034	0.17089937889208565	0.12100290568825289	0.5454021178596278	0.0700692596479948
mee-type_gan_quantileUni_lda_100.csv	decision_tree	0.046153846153846156	0.023823608119427256	0.0165729296446384	0.07573476266305391	0.1084772370486656	0.1857466280688715	-0.12215766381219731	0.33911213790952854	0.11221719457013575
mee-type_gan_quantileUni_lda_100.csv	decision_tree_bal	0.041758241758241756	0.026235904145743567	0.009182064120147028	0.07433441939633648	0.1063064713064713	0.18682751058352565	-0.12567052245912566	0.3382834650720683	0.11273432449903038
mee-type_gan_quantileUni_lda_100.csv	extra_tree	0.02197802197802198	0.013458734850457024	0.005266795452839139	0.03868924850320482	0.10540446650124069	0.15932226749466916	-0.0924202571590802	0.3032291901615616	0.07672892049127342
mee-type_gan_quantileUni_lda_100.csv	extra_tree_bal	0.017582417582417582	0.012529400275814704	0.0020251123408541218	0.033139722823981047	0.027178401371949757	0.03667006046692402	-0.018353492521784993	0.07271029526568451	0.07695956043956044
mee-type_gan_quantileUni_lda_100.csv	lda	0.46813186813186813	0.014743305346152456	0.44982563666902553	0.48643809959471074	0.34928492353618745	0.026696800713340883	0.3161364672232114	0.3824333798491635	0.04001468944962179
mee-type_gan_quantileUni_lda_100.csv	gaussian_nb	0.03076923076923077	0.014327917374071755	0.012978771596607624	0.04855968994185392	0.028710534428050376	0.03969880970677808	-0.020582048356398194	0.07800311721249895	0.08337822293933897
mee-type_gan_quantileUni_lda_100.csv	svm_rbf_1	0.12527472527472527	0.019962529807236208	0.1004879707000105	0.15006147984944004	0.4420725409423089	0.04004284476774301	0.39235278220854036	0.49179229967607746	0.05932658319253602
mee-type_gan_quantileUni_lda_100.csv	svm_rbf_2	0.09010989010989011	0.030493267968157378	0.05224749708624898	0.12797228313353123	0.18484824699110414	0.21647516455009652	-0.08394117133598694	0.4536376653181952	0.06171454318690271
mee-type_gan_quantileUni_lda_100.csv	svm_rbf_3	0.07912087912087913	0.009194066225649184	0.06770493809138935	0.09053682015036892	0.4022230662133236	0.03475031123616037	0.3590748558250074	0.4453712766016398	0.05739522632670768
mee-type_gan_quantileUni_lda_100.csv	svm_rbf_auto	0.06373626373626373	0.048774375870708014	0.0031748771827471087	0.12429765028978035	0.008078120110818392	0.007211237547143979	-0.0008758139339655243	0.017032054155602307	0.06078843998522219
mee-type_gan_quantileUni_lda_100.csv	svm_rbf_bal	0.12527472527472527	0.019962529807236208	0.1004879707000105	0.15006147984944004	0.4420725409423089	0.04004284476774301	0.39235278220854036	0.49179229967607746	0.059273889383042844
mee-type_gan_quantileUni_lda_100.csv	svm_linear_bal	0.45494505494505494	0.014743305346152482	0.4366388234822123	0.4732512864078976	0.4238461538461539	0.0033431807206167545	0.4196950467058751	0.42799726098643265	0.035681105192360146
mee-type_gan_quantileUni_lda_100.csv	svm_sigmoid	0.0	0.0	0.0	0.0	0.0	0.0	0.0	0.0	0.05560159247285677
mee-type_gan_quantileUni_lda_100.csv	svm_sigmoid_bal	0.0	0.0	0.0	0.0	0.0	0.0	0.0	0.0	0.05561795373960042
mee-type_gan_quantileUni_lda_100.csv	svm_poly_3	0.4593406593406593	0.01203785840670695	0.44439368394157674	0.4742876347397419	0.41903063000348073	0.015364765844564731	0.3999527534134538	0.43810850659350764	0.04053814384815409
mee-type_gan_quantileUni_lda_100.csv	svm_poly_4	0.38461538461538464	0.0	0.38461538461538464	0.38461538461538464	0.25598125198996025	0.004298171024608189	0.2506443677705817	0.2613181362093388	0.059362165584399704
mee-type_gan_quantileUni_lda_100.csv	mlp_50_lr0.001	0.4417582417582418	0.014327917374071755	0.4239677825856186	0.459548700930865	0.43309065891109233	0.019552038853446987	0.40881359617528595	0.4573677216468987	0.05025176219247427
mee-type_gan_quantileUni_lda_100.csv	mlp_100_lr0.001	0.4461538461538462	0.016665660316596817	0.4254606957324347	0.46684699657525763	0.42136752136752137	0.004357392394379877	0.41595710410537295	0.4267779386296698	0.05263754190316987
mee-type_gan_quantileUni_lda_100.csv	mlp_50x2_lr0.001	0.42637362637362636	0.03916160369495707	0.3777480729536746	0.47499917979357814	0.411523952238238	0.02327484022979951	0.3826244210609513	0.44042348341552473	0.055665242524279866
mee-type_gan_quantileUni_lda_100.csv	mlp_128_64	0.2967032967032967	0.04975486339635944	0.23492447408849082	0.3584821193181026	0.39065934065934066	0.011576192742168838	0.37628559889512186	0.40503308242355945	0.0655057051411559
mee-type_gan_quantileUni_lda_100.csv	mlp_128_64_es	0.44835164835164837	0.03049326796815739	0.41048925532800723	0.4862140413752895	0.42365948154409694	0.007240213260638068	0.41466956939904515	0.43264939368914873	0.0471083863331813
mee-type_gan_quantileUni_lda_100.csv	mlp_128_64_alpha	0.30769230769230765	0.05710057607369925	0.23679257810489993	0.37859203727971535	0.4107692307692307	0.03515088415431506	0.3671236434097865	0.45441481812867496	0.06677294636226926
mee-type_flow_quantileUni_lda_10000.csv	logistic_l2_1	0.03296703296703297	0.0	0.03296703296703297	0.03296703296703297	0.3860805860805861	0.0	0.3860805860805861	0.3860805860805861	0.05673150344050086
mee-type_flow_quantileUni_lda_10000.csv	logistic_l2_2	0.03296703296703297	0.0	0.03296703296703297	0.03296703296703297	0.3860805860805861	0.0	0.3860805860805861	0.3860805860805861	0.05673143913515867
mee-type_flow_quantileUni_lda_10000.csv	logistic_l2_3	0.03296703296703297	0.0	0.03296703296703297	0.03296703296703297	0.3860805860805861	0.0	0.3860805860805861	0.3860805860805861	0.05673157572416061
mee-type_flow_quantileUni_lda_10000.csv	logistic_l1_1	0.03296703296703297	0.0	0.03296703296703297	0.03296703296703297	0.3860805860805861	0.0	0.3860805860805861	0.3860805860805861	0.05673159728875882
mee-type_flow_quantileUni_lda_10000.csv	logistic_l1_2	0.03296703296703297	0.0	0.03296703296703297	0.03296703296703297	0.3860805860805861	0.0	0.3860805860805861	0.3860805860805861	0.056732214886014265
mee-type_flow_quantileUni_lda_10000.csv	logistic_l1_3	0.03296703296703297	0.0	0.03296703296703297	0.03296703296703297	0.3860805860805861	0.0	0.3860805860805861	0.3860805860805861	0.05673157109682908
mee-type_flow_quantileUni_lda_10000.csv	logistic_l2_balanced_1	0.03296703296703297	0.0	0.03296703296703297	0.03296703296703297	0.3860805860805861	0.0	0.3860805860805861	0.3860805860805861	0.05673154812178133
mee-type_flow_quantileUni_lda_10000.csv	logistic_l1_balanced_1	0.03296703296703297	0.0	0.03296703296703297	0.03296703296703297	0.3860805860805861	0.0	0.3860805860805861	0.3860805860805861	0.05673156719249539
mee-type_flow_quantileUni_lda_10000.csv	rf_100_10	0.22857142857142856	0.18606832759368386	-0.002462915007633154	0.45960577215049025	0.21495100120368935	0.16866684603548623	0.0055234507908484	0.42437855161653026	0.049769423797769795
mee-type_flow_quantileUni_lda_10000.csv	rf_100_20	0.27252747252747256	0.201940830497097	0.021784813531858016	0.5232701315230871	0.22561506945630497	0.16645280972104776	0.018936608225818025	0.4322935306867919	0.053425124842002694
mee-type_flow_quantileUni_lda_10000.csv	rf_200_10	0.2087912087912088	0.2073402446605847	-0.048655708382599944	0.46623812596501757	0.18112709918676212	0.18948944148623348	-0.05415511834643322	0.41640931671995746	0.050297468751460975
mee-type_flow_quantileUni_lda_10000.csv	rf_200_20	0.22417582417582418	0.1789893672139636	0.001931170844971991	0.44642047750667635	0.23233363524091785	0.13795217175113805	0.06104339010350707	0.40362388037832864	0.0538514775123559
mee-type_flow_quantileUni_lda_10000.csv	rf_bal_100_10	0.18681318681318682	0.19316918495875765	-0.05303803571246707	0.4266644093388407	0.17216611135456267	0.16985482867043974	-0.03873651432659128	0.38306873703571664	0.05226117989854595
mee-type_flow_quantileUni_lda_10000.csv	rf_bal_200_20	0.24395604395604398	0.17912424995142828	0.021543911586102693	0.46636817632598526	0.25315078013433956	0.15718791274849514	0.0579762079217383	0.4483253523469408	0.053634060550690754
mee-type_flow_quantileUni_lda_10000.csv	decision_tree	0.265934065934066	0.058870748290017025	0.19283637723503588	0.3390317546330961	0.45281004709576134	0.02045598791970355	0.4274105833481743	0.4782095108433484	0.086360698125404
mee-type_flow_quantileUni_lda_10000.csv	decision_tree_bal	0.265934065934066	0.06426457809764152	0.18613905295047023	0.34572907891766175	0.4518281158617293	0.031823242359479836	0.41231434151785007	0.4913418902056085	0.086360698125404
mee-type_flow_quantileUni_lda_10000.csv	extra_tree	0.15604395604395607	0.17878685230783936	-0.06594924181886205	0.37803715390677417	0.12438744197184057	0.14832152008829552	-0.05977804968065273	0.3085529336243339	0.06531431157078216
mee-type_flow_quantileUni_lda_10000.csv	extra_tree_bal	0.18021978021978025	0.1849617368564482	-0.0494405494801102	0.4098801099196707	0.13134859894032222	0.15044733932659565	-0.055456445927057285	0.3181536438077017	0.06281251454427925
mee-type_flow_quantileUni_lda_10000.csv	lda	0.4065934065934066	0.0	0.4065934065934066	0.4065934065934066	0.2936189414450284	0.0	0.2936189414450284	0.2936189414450284	0.05268432951763644
mee-type_flow_quantileUni_lda_10000.csv	gaussian_nb	0.38461538461538464	0.0	0.38461538461538464	0.38461538461538464	0.1570864480347239	0.006297559032929277	0.1492669957069727	0.16490590036247513	0.06816502086516131
mee-type_flow_quantileUni_lda_10000.csv	svm_rbf_1	0.035164835164835165	0.01805678761006042	0.012744372066211311	0.05758529826345902	0.007252594122009464	0.007616129206108427	-0.0022040793188836047	0.016709267562902533	0.06710727957308685
mee-type_flow_quantileUni_lda_10000.csv	svm_rbf_2	0.05494505494505495	7.757919228897728e-18	0.054945054945054944	0.05494505494505496	0.00834079525417599	0.0012641970143038056	0.006771087334878263	0.009910503173473719	0.09010719808567906
mee-type_flow_quantileUni_lda_10000.csv	svm_rbf_3	0.0	0.0	0.0	0.0	0.0	0.0	0.0	0.0	0.060892365949341866
mee-type_flow_quantileUni_lda_1000.csv	logistic_l2_1	0.4461538461538462	0.03259867466855237	0.4056772454287476	0.48663044687894474	0.30838514575972775	0.010835993251003094	0.2949304830551782	0.3218398084642773	0.0396837695220474
mee-type_flow_quantileUni_lda_1000.csv	logistic_l2_2	0.4461538461538462	0.03259867466855237	0.4056772454287476	0.48663044687894474	0.30838514575972775	0.010835993251003094	0.2949304830551782	0.3218398084642773	0.03968937246578964
mee-type_flow_quantileUni_lda_1000.csv	logistic_l2_3	0.4461538461538462	0.03259867466855237	0.4056772454287476	0.48663044687894474	0.30838514575972775	0.010835993251003094	0.2949304830551782	0.3218398084642773	0.039683214470884506
mee-type_flow_quantileUni_lda_1000.csv	logistic_l1_1	0.4461538461538462	0.03259867466855237	0.4056772454287476	0.48663044687894474	0.30838514575972775	0.010835993251003094	0.2949304830551782	0.3218398084642773	0.03968410854767185
mee-type_flow_quantileUni_lda_1000.csv	logistic_l1_2	0.4461538461538462	0.03259867466855237	0.4056772454287476	0.48663044687894474	0.30838514575972775	0.010835993251003094	0.2949304830551782	0.3218398084642773	0.039708171863621654
mee-type_flow_quantileUni_lda_1000.csv	logistic_l1_3	0.4461538461538462	0.03259867466855237	0.4056772454287476	0.48663044687894474	0.30838514575972775	0.010835993251003094	0.2949304830551782	0.3218398084642773	0.03968328220401582
mee-type_flow_quantileUni_lda_1000.csv	logistic_l2_balanced_1	0.4461538461538462	0.03259867466855237	0.4056772454287476	0.48663044687894474	0.30838514575972775	0.010835993251003094	0.2949304830551782	0.3218398084642773	0.03968376100801055
mee-type_flow_quantileUni_lda_1000.csv	logistic_l1_balanced_1	0.4461538461538462	0.03259867466855237	0.4056772454287476	0.48663044687894474	0.30838514575972775	0.010835993251003094	0.2949304830551782	0.3218398084642773	0.03968409631734396
mee-type_flow_quantileUni_lda_1000.csv	rf_100_10	0.17582417582417584	0.1704182683436354	-0.035778052614344885	0.3874264042626966	0.19904032589656495	0.13384425538585454	0.0328507326175588	0.3652299191755711	0.05413111441442568
mee-type_flow_quantileUni_lda_1000.csv	rf_100_20	0.23956043956043951	0.16582122646100164	0.03366619252582001	0.44545468659505905	0.2748545898545898	0.11721850563220494	0.12930859148783552	0.42040058822134413	0.05550236096455299
mee-type_flow_quantileUni_lda_1000.csv	rf_200_10	0.2967032967032967	0.12212148775215861	0.14506944195435914	0.4483371514522343	0.3608124414919547	0.03173867752224836	0.32140366826197975	0.4002212147219296	0.05232154164136897
mee-type_flow_quantileUni_lda_1000.csv	rf_200_20	0.24835164835164836	0.13561525950747147	0.07996306301415998	0.4167402336891367	0.34138986183743214	0.04559660126972671	0.2847742036003603	0.39800552007450396	0.05453959893610736
mee-type_flow_quantileUni_lda_1000.csv	rf_bal_100_10	0.1274725274725275	0.15179161889962203	-0.06100166094419962	0.3159467158892546	0.20083870909452303	0.10651964974014944	0.0685770949109043	0.33310032327814176	0.055122447971130514
mee-type_flow_quantileUni_lda_1000.csv	rf_bal_200_20	0.22417582417582418	0.13782340303396173	0.053045466518626155	0.39530618183302224	0.25626740955287086	0.06300597289859655	0.1780351613328813	0.3344996577728604	0.05491503837587832
mee-type_flow_quantileUni_lda_1000.csv	decision_tree	0.017582417582417582	0.009828870230768305	0.0053782632738558316	0.029786571890979333	0.01613484076898711	0.021050179789089053	-0.01000240963084132	0.04227209116881554	0.11557853910795086
mee-type_flow_quantileUni_lda_1000.csv	decision_tree_bal	0.026373626373626374	0.018388132451298365	0.0035417443146468185	0.04920550843260593	0.028442533076679422	0.02695536014996753	-0.0050269671801517375	0.061912033333510585	0.1145442792501616
mee-type_flow_quantileUni_lda_1000.csv	extra_tree	0.0945054945054945	0.12398604578082054	-0.05944351482019436	0.24845450383118337	0.11987368336066757	0.15649173331312105	-0.07443646791073986	0.314183834632075	0.06510694246929541
mee-type_flow_quantileUni_lda_1000.csv	extra_tree_bal	0.06813186813186814	0.12172530994327901	-0.08301006689489637	0.21927380315863265	0.05847583310997946	0.12302645485670424	-0.09428168671223112	0.21123335293219003	0.06620617970265029
mee-type_flow_quantileUni_lda_1000.csv	lda	0.4175824175824176	0.024572175576920777	0.3870720318110132	0.448092803353822	0.29612484823664953	0.004894372197929686	0.2900476824846708	0.3022020139886283	0.03956724957599307
mee-type_flow_quantileUni_lda_1000.csv	gaussian_nb	0.38461538461538464	0.0	0.38461538461538464	0.38461538461538464	0.1819126819126819	0.0	0.1819126819126819	0.1819126819126819	0.06678841936674965
mee-type_flow_quantileUni_lda_1000.csv	svm_rbf_1	0.4989010989010989	0.01474330534615247	0.48059486743825625	0.5172073303639415	0.41128064606928627	0.007489912044620937	0.4019806919337677	0.42058060020480487	0.035955539871724715
mee-type_flow_quantileUni_lda_1000.csv	svm_rbf_2	0.42637362637362636	0.004914435115384136	0.4202715492193455	0.4324757035279072	0.3369007186915531	0.023614712198518635	0.3075791807267092	0.36622225665639696	0.03808880362521199
mee-type_flow_quantileUni_lda_1000.csv	svm_rbf_3	0.4835164835164836	0.010989010989011005	0.46987182419556306	0.4971611428374041	0.433050045343777	0.025342241546043323	0.40158349638227125	0.46451659430528275	0.04840687586941471
mee-type_flow_quantileUni_lda_1000.csv	svm_rbf_auto	0.06813186813186813	0.0049144351153841545	0.06202979097758725	0.074233945286149	0.38795761981186605	1.805184805826378e-05	0.3879352054820311	0.387980034141701	0.055197999358960935
mee-type_flow_quantileUni_lda_1000.csv	svm_rbf_bal	0.4989010989010989	0.01474330534615247	0.48059486743825625	0.5172073303639415	0.41128064606928627	0.007489912044620937	0.4019806919337677	0.42058060020480487	0.036632904792327184
mee-type_flow_quantileUni_lda_1000.csv	svm_linear_bal	0.44615384615384623	0.034401045807689073	0.4034393060738801	0.48886838623381235	0.3942269282674141	0.01355012575133177	0.3774022249508517	0.41105163158397656	0.04728291305594794
mee-type_flow_quantileUni_lda_1000.csv	svm_sigmoid	0.2879120879120879	0.0661169624461157	0.2058170359721556	0.37000713985202016	0.4554902434346519	0.03401753688874373	0.41325189257233025	0.4977285942969735	0.054672914020814145
mee-type_flow_quantileUni_lda_1000.csv	svm_sigmoid_bal	0.2879120879120879	0.0661169624461157	0.2058170359721556	0.37000713985202016	0.4554902434346519	0.03401753688874373	0.41325189257233025	0.4977285942969735	0.05450985644963594
mee-type_flow_quantileUni_lda_1000.csv	svm_poly_3	0.41098901098901097	0.0199625298072362	0.38620225641429623	0.4357757655637257	0.3585822297360759	0.01259744419558737	0.3429404368090341	0.3742240226631177	0.052852567613844936
mee-type_flow_quantileUni_lda_1000.csv	svm_poly_4	0.3802197802197802	0.033511979520828364	0.3386091617402257	0.4218303986993347	0.22326756968123235	0.014667880821597545	0.2050549901351112	0.2414801492273535	0.05536096600605848
mee-type_flow_quantileUni_lda_1000.csv	mlp_50_lr0.001	0.4087912087912088	0.021137784683155317	0.3825451825483518	0.4350372350340658	0.3244014808720691	0.011962659811620768	0.30954787686122054	0.33925508488291767	0.05030303449111408
mee-type_flow_quantileUni_lda_1000.csv	mlp_100_lr0.001	0.41978021978021973	0.029486610692304932	0.38316775685453447	0.456392682705905	0.3424540089290664	0.042689893572398656	0.28944750499306865	0.3954605128650642	0.0504121850060595
mee-type_flow_quantileUni_lda_1000.csv	mlp_50x2_lr0.001	0.4065934065934066	0.04395604395604395	0.35201476930972453	0.46117204387708866	0.32971798054906265	0.03140178950233045	0.29072750904484596	0.36870845205327935	0.05568285829619175
mee-type_flow_quantileUni_lda_100.csv	logistic_l2_1	0.42417582417582417	0.025298603149937017	0.392763459439703	0.45558818891194536	0.2991403765316809	0.009710537951353413	0.287083151154294	0.3111976019090678	0.04094753465293698
mee-type_flow_quantileUni_lda_100.csv	logistic_l2_2	0.42417582417582417	0.025298603149937017	0.392763459439703	0.45558818891194536	0.2991403765316809	0.009710537951353413	0.287083151154294	0.3111976019090678	0.04089356340173591
mee-type_flow_quantileUni_lda_100.csv	logistic_l2_3	0.42417582417582417	0.025298603149937017	0.392763459439703	0.45558818891194536	0.2991403765316809	0.009710537951353413	0.287083151154294	0.3111976019090678	0.040953027534088644
mee-type_flow_quantileUni_lda_100.csv	logistic_l1_1	0.42417582417582417	0.025298603149937017	0.392763459439703	0.45558818891194536	0.2991403765316809	0.009710537951353413	0.287083151154294	0.3111976019090678	0.04094902347596304
mee-type_flow_quantileUni_lda_100.csv	logistic_l1_2	0.42417582417582417	0.025298603149937017	0.392763459439703	0.45558818891194536	0.2989452817713688	0.009286317730937969	0.28741479536898185	0.3104757681737558	0.04089832182953775
mee-type_flow_quantileUni_lda_100.csv	logistic_l1_3	0.42417582417582417	0.025298603149937017	0.392763459439703	0.45558818891194536	0.2991403765316809	0.009710537951353413	0.287083151154294	0.3111976019090678	0.040953315153585065
mee-type_flow_quantileUni_lda_100.csv	logistic_l2_balanced_1	0.42417582417582417	0.025298603149937017	0.392763459439703	0.45558818891194536	0.2991403765316809	0.009710537951353413	0.287083151154294	0.3111976019090678	0.040947726455539804
mee-type_flow_quantileUni_lda_100.csv	logistic_l1_balanced_1	0.42417582417582417	0.025298603149937017	0.392763459439703	0.45558818891194536	0.2991403765316809	0.009710537951353413	0.287083151154294	0.3111976019090678	0.0409490572728358
mee-type_flow_quantileUni_lda_100.csv	rf_100_10	0.27032967032967037	0.1454955014739656	0.08967314424884426	0.4509861964104965	0.2543109114913129	0.12980615268331314	0.09313528495910176	0.4154865380235241	0.05620699871876692
mee-type_flow_quantileUni_lda_100.csv	rf_100_20	0.2857142857142857	0.1134053156074192	0.14490298811961758	0.42652558330895385	0.31992828774931914	0.044591170728273226	0.2645610364182647	0.3752955390803736	0.05593671222510982
mee-type_flow_quantileUni_lda_100.csv	rf_200_10	0.2	0.13930494914545682	0.027030059874479734	0.3729699401255203	0.23785248716336213	0.11063018971723355	0.10048696347702069	0.3752180108497036	0.05613547325302881
mee-type_flow_quantileUni_lda_100.csv	rf_200_20	0.21318681318681318	0.1574537767875349	0.01768212716851922	0.40869149920510717	0.26248693457316036	0.04338807136627672	0.20861352840615885	0.31636034074016184	0.0563732317249244
mee-type_flow_quantileUni_lda_100.csv	rf_bal_100_10	0.19560439560439563	0.16835078759140695	-0.01343071641710375	0.404639507625895	0.18546951439071555	0.13656945616121025	0.015896137421073236	0.3550428913603578	0.05630956001290973
mee-type_flow_quantileUni_lda_100.csv	rf_bal_200_20	0.24615384615384617	0.14361590551828168	0.06783114670236218	0.42447654560533016	0.30173778284146174	0.02367202673791115	0.2723450794764805	0.331130486206443	0.055393986404387544
mee-type_flow_quantileUni_lda_100.csv	decision_tree	0.1054945054945055	0.15159260004007383	-0.08273256836935701	0.293721579358368	0.07137445887445887	0.12355863945930996	-0.08204385540920561	0.22479277315812335	0.10523594053005818
mee-type_flow_quantileUni_lda_100.csv	decision_tree_bal	0.1010989010989011	0.14833129693535782	-0.08307873011260539	0.2852765323104076	0.07026029526029526	0.1230870879693461	-0.08257251051498174	0.22309310103557226	0.1057530704589528
mee-type_flow_quantileUni_lda_100.csv	extra_tree	0.1208791208791209	0.16683765330427447	-0.08627718677359839	0.3280354285318402	0.08441400386354746	0.12641397747579577	-0.07254968083789003	0.24137768856498493	0.06660501616031028
mee-type_flow_quantileUni_lda_100.csv	extra_tree_bal	0.11648351648351649	0.16567551358008265	-0.08922980411279133	0.32219683707982427	0.07956555031208638	0.1268705402894743	-0.07796503199801434	0.2370961326221871	0.06775066580478345
mee-type_flow_quantileUni_lda_100.csv	lda	0.41318681318681316	0.014743305346152456	0.39488058172397056	0.43149304464965577	0.2947414697104139	0.002319473904025165	0.2918614624690127	0.29762147695181507	0.04381652917976557
mee-type_flow_quantileUni_lda_100.csv	gaussian_nb	0.05714285714285714	0.014327917374071755	0.039352397970233995	0.07493331631548028	0.38533315593679907	6.436271337937257e-05	0.3852532390727692	0.3854130728008289	0.08334906512409819
mee-type_flow_quantileUni_lda_100.csv	svm_rbf_1	0.4571428571428572	0.024075716813413892	0.42724890634469204	0.48703680794102233	0.35117744574266313	0.024032422711672538	0.3213372516719648	0.38101763981336145	0.037256708013539544
mee-type_flow_quantileUni_lda_100.csv	svm_rbf_2	0.46153846153846156	0.0	0.46153846153846156	0.46153846153846156	0.3573097842328611	0.017829608647437677	0.33517140107327514	0.379448167392447	0.0363340159198458
mee-type_flow_quantileUni_lda_100.csv	svm_rbf_3	0.46373626373626375	0.028444349682516006	0.4284179387831649	0.4990545886893626	0.3654054417343454	0.027502460017943507	0.33125662726802646	0.39955425620066437	0.05429648943051278
mee-type_flow_quantileUni_lda_100.csv	svm_rbf_auto	0.0989010989010989	0.0	0.0989010989010989	0.0989010989010989	0.009868373384856901	4.8604303338964066e-05	0.009808023171243135	0.009928723598470668	0.05727923775388758
mee-type_flow_quantileUni_lda_100.csv	svm_rbf_bal	0.4571428571428572	0.024075716813413892	0.42724890634469204	0.48703680794102233	0.35117744574266313	0.024032422711672538	0.3213372516719648	0.38101763981336145	0.03724702604077536
mee-type_flow_quantileUni_lda_100.csv	svm_linear_bal	0.4747252747252747	0.018056787610060417	0.45230481162665087	0.49714573782389854	0.3827806070565739	0.02381433148317366	0.35321120901262665	0.41235000510052117	0.03675701750181097
mee-type_flow_quantileUni_lda_100.csv	svm_sigmoid	0.41538461538461535	0.033331320633193634	0.37399831454179244	0.45677091622743826	0.3217882620507345	0.02330120890169011	0.2928559898428808	0.35072053425858823	0.047031012535305096
mee-type_flow_quantileUni_lda_100.csv	svm_sigmoid_bal	0.41538461538461535	0.033331320633193634	0.37399831454179244	0.45677091622743826	0.3217882620507345	0.02330120890169011	0.2928559898428808	0.35072053425858823	0.047046567584755804
mee-type_flow_quantileUni_lda_100.csv	svm_poly_3	0.45494505494505494	0.018388132451298368	0.43211317288607537	0.4777769370040345	0.35149093067211545	0.01927128784871253	0.3275624663513474	0.3754193949928835	0.05537818855186309
mee-type_flow_quantileUni_lda_100.csv	svm_poly_4	0.38461538461538464	0.0	0.38461538461538464	0.38461538461538464	0.24388111888111888	0.001954604875436881	0.24145415637657536	0.2463080813856624	0.055393757760187845
mee-type_flow_quantileUni_lda_100.csv	mlp_50_lr0.001	0.5098901098901099	0.006018929203353513	0.5024166221905685	0.5173635975896512	0.452880147935093	0.004379800818568758	0.4474419069393728	0.4583183889308132	0.04381505285949121
mee-type_flow_quantileUni_lda_100.csv	mlp_100_lr0.001	0.4967032967032967	0.040674187963344516	0.44619962185303885	0.5472069715535546	0.44864434004399306	0.03997950175163277	0.39900323205286625	0.49828544803511987	0.04476143334447343
mee-type_flow_quantileUni_lda_100.csv	mlp_50x2_lr0.001	0.4593406593406593	0.014327917374071752	0.4415502001680362	0.47713111851328244	0.44761682312289597	0.038549481778583396	0.3997513194490169	0.49548232679677506	0.04731905705870293
mee-type_flow_quantileUni_lda_100.csv	mlp_128_64	0.4461538461538462	0.03069063745883285	0.4080463865392895	0.48426130576840287	0.40633457410785356	0.04092476963295614	0.3555197610198292	0.45714938719587794	0.04906737975432543
mee-type_flow_quantileUni_lda_100.csv	mlp_128_64_es	0.46813186813186813	0.009828870230768292	0.4559277138233064	0.4803360224404299	0.37339686070031614	0.021345496757289955	0.34689292585301396	0.3999007955476183	0.04041792333933292
mee-type_flow_quantileUni_lda_100.csv	mlp_128_64_alpha	0.3802197802197802	0.009828870230768321	0.36801562591121845	0.39242393452834196	0.3904331835505924	0.04666122037423088	0.3324956260996579	0.44837074100152696	0.05587483982626625
mee-type_ddpm_quantileUni_lda_5.csv	logistic_l2_1	0.0697674418604651	0.018385335233537088	0.04693903300607486	0.09259585071485535	0.0328549517058409	0.012463665800662941	0.017379266595514205	0.048330636816167595	0.1024778870400725
mee-type_ddpm_quantileUni_lda_5.csv	logistic_l2_2	0.046511627906976744	0.0	0.046511627906976744	0.046511627906976744	0.016913319238900635	0.0	0.016913319238900635	0.016913319238900635	0.068021859448501
mee-type_ddpm_quantileUni_lda_5.csv	logistic_l2_3	0.04883720930232558	0.005200158087208813	0.04238036022047024	0.05529405838418092	0.02156448202959831	0.010400316174417628	0.008650783865887616	0.034478180193309005	0.11243984325968041
mee-type_ddpm_quantileUni_lda_5.csv	logistic_l1_1	0.08139534883720931	0.03184433473867245	0.041855384845450185	0.12093531282896844	0.03343718704795816	0.015084158560423791	0.014707730420282786	0.052166643675633534	0.10752941536342098
mee-type_ddpm_quantileUni_lda_5.csv	logistic_l1_2	0.06744186046511627	0.01910660084320347	0.04371788207006079	0.09116583886017175	0.028477297895902542	0.026656740279958742	-0.0046214168191904235	0.061576012610995504	0.0620242773877676
mee-type_ddpm_quantileUni_lda_5.csv	logistic_l1_3	0.046511627906976744	0.0	0.046511627906976744	0.046511627906976744	0.016913319238900635	0.0	0.016913319238900635	0.016913319238900635	0.11458454119849386
mee-type_ddpm_quantileUni_lda_5.csv	logistic_l2_balanced_1	0.0697674418604651	0.018385335233537088	0.04693903300607486	0.09259585071485535	0.0328549517058409	0.012463665800662941	0.017379266595514205	0.048330636816167595	0.1024783361806911
mee-type_ddpm_quantileUni_lda_5.csv	logistic_l1_balanced_1	0.08139534883720931	0.03184433473867245	0.041855384845450185	0.12093531282896844	0.03343718704795816	0.015084158560423791	0.014707730420282786	0.052166643675633534	0.10753245585737306
mee-type_ddpm_quantileUni_lda_5.csv	rf_100_10	0.10930232558139537	0.02547546779093796	0.07767035438798807	0.14093429677480268	0.024202016152638596	0.007111818374265728	0.015371527315548802	0.03303250498972839	0.0830123985656278
mee-type_ddpm_quantileUni_lda_5.csv	rf_100_20	0.08139534883720931	0.03288868749704872	0.04055864962394957	0.12223204805046906	0.013554782719276359	0.00971165513392124	0.0014961701765155763	0.02561339526203714	0.0836773953488372
mee-type_ddpm_quantileUni_lda_5.csv	rf_200_10	0.12790697674418605	0.0	0.12790697674418605	0.12790697674418605	0.03000815256069019	0.0007694340354489564	0.02905277401988058	0.030963531101499797	0.08211080605468545
mee-type_ddpm_quantileUni_lda_5.csv	rf_200_20	0.10930232558139537	0.02547546779093796	0.07767035438798807	0.14093429677480268	0.024179750322584657	0.008167440668461081	0.014038533287091226	0.03432096735807809	0.08362621705426357
mee-type_ddpm_quantileUni_lda_5.csv	rf_bal_100_10	0.1186046511627907	0.020800632348835252	0.09277725483536932	0.14443204749021207	0.02777294135147077	0.004779506168069277	0.02183840061338631	0.033707482089555235	0.08275810565221552
mee-type_ddpm_quantileUni_lda_5.csv	rf_bal_200_20	0.09069767441860466	0.020800632348835252	0.06487027809118327	0.11652507074602604	0.017327754997384072	0.007284813945186791	0.008282463788032888	0.026373046206735258	0.09095320930232557
mee-type_ddpm_quantileUni_lda_5.csv	decision_tree	0.05348837209302326	0.025475467790937963	0.021856400899615956	0.08512034328643056	0.007714895695000337	0.007769077371975165	-0.0019316879770407578	0.01736147936704143	0.1262015503875969
mee-type_ddpm_quantileUni_lda_5.csv	decision_tree_bal	0.04418604651162791	0.020800632348835255	0.018358650184206526	0.0700134428390493	0.004253632057900058	0.004367848949483151	-0.0011697687322653116	0.009677032848065429	0.12744186046511627
mee-type_ddpm_quantileUni_lda_5.csv	extra_tree	0.058139534883720936	0.02726985906874087	0.02427953264197491	0.09199953712546696	0.010804700337840745	0.008818976696126374	-0.00014550552673737137	0.021754906202418864	0.09161472868217053
mee-type_ddpm_quantileUni_lda_5.csv	extra_tree_bal	0.08139534883720931	0.03288868749704872	0.04055864962394957	0.12223204805046906	0.01804619939099211	0.009887312654940802	0.005769479228367616	0.0303229195536166	0.08909262015503876
mee-type_ddpm_quantileUni_lda_5.csv	lda	0.07209302325581395	0.025208701614742795	0.04079228601932666	0.10339376049230123	0.024285965972012484	0.013756471177100268	0.0072050509690792935	0.041366880974945675	0.11152594870348316
mee-type_ddpm_quantileUni_lda_5.csv	gaussian_nb	0.39302325581395353	0.06800089077773695	0.30858899788945104	0.477457513738456	0.43164587662319676	0.017932752742701088	0.409379423153895	0.45391233009249854	0.07770045526364575
mee-type_ddpm_quantileUni_lda_5.csv	svm_rbf_1	0.018604651162790697	0.01763459405593384	-0.003291589399400493	0.04050089172498189	0.003630579651014965	0.003035225085568857	-0.0001381500641808313	0.007399309366210761	0.05877700676480183
mee-type_ddpm_quantileUni_lda_5.csv	svm_rbf_2	0.02558139534883721	0.01910660084320347	0.0018574169537817313	0.04930537374389268	0.005835486649440138	0.003433847224405799	0.0015718021755635279	0.010099171123316748	0.06236511016413652
mee-type_ddpm_quantileUni_lda_5.csv	svm_rbf_3	0.018604651162790697	0.01763459405593384	-0.003291589399400493	0.04050089172498189	0.004148184996338211	0.0031613258756973987	0.000222880469894755	0.008073489522781667	0.06271090353108941
mee-type_ddpm_quantileUni_lda_5.csv	svm_rbf_auto	0.07906976744186048	0.020800632348835255	0.053242371114439094	0.10489716376928186	0.007015121473964917	0.0033345393421947036	0.0028747440221676837	0.01115549892576215	0.06213786400876688
mee-type_ddpm_quantileUni_lda_5.csv	svm_rbf_bal	0.018604651162790697	0.01763459405593384	-0.003291589399400493	0.04050089172498189	0.003630579651014965	0.003035225085568857	-0.0001381500641808313	0.007399309366210761	0.0593121009076909
mee-type_ddpm_quantileUni_lda_5.csv	svm_linear_bal	0.06279069767441861	0.015600474261626442	0.04342015042885257	0.08216124491998465	0.018846378338887766	0.002256260938532735	0.016044860360958226	0.021647896316817305	0.07353438815810617
mee-type_ddpm_quantileUni_lda_5.csv	svm_sigmoid	0.01627906976744186	0.030321871652105342	-0.021370506621132705	0.053928646156016426	0.006430133174319221	0.01340059164677736	-0.010208899028114352	0.02306916537675279	0.05410344244279623
mee-type_ddpm_quantileUni_lda_5.csv	svm_sigmoid_bal	0.01627906976744186	0.030321871652105342	-0.021370506621132705	0.053928646156016426	0.006430133174319221	0.01340059164677736	-0.010208899028114352	0.02306916537675279	0.054208527962755715
mee-type_ddpm_quantileUni_lda_5.csv	svm_poly_3	0.08604651162790698	0.02918581487909566	0.049807536034294095	0.12228548722151987	0.02255008557334139	0.0060081219170489706	0.015090016892122686	0.030010154254560092	0.06572519612462249
mee-type_ddpm_quantileUni_lda_5.csv	svm_poly_4	0.02558139534883721	0.020800632348835252	-0.0002460009785841717	0.051408791676258586	0.00711768851303735	0.005613496003108564	0.00014761262191670833	0.014087764404157991	0.08044062501021225
mee-type_ddpm_quantileUni_lda_5.csv	mlp_50_lr0.001	0.02558139534883721	0.020800632348835252	-0.0002460009785841717	0.051408791676258586	0.03482734319943622	0.056860302550124496	-0.03577404740402718	0.10542873380289963	0.08439294353414302
mee-type_ddpm_quantileUni_lda_5.csv	mlp_100_lr0.001	0.07441860465116279	0.05612799249370778	0.004726497080274589	0.144110712222051	0.08127613342729623	0.1427764841491147	-0.09600428673077022	0.25855655358536267	0.08493188840569366
mee-type_ddpm_quantileUni_lda_5.csv	mlp_50x2_lr0.001	0.10465116279069767	0.08740288592077272	-0.003873853996236673	0.21317617957763202	0.11993774958891237	0.14649897666394293	-0.06196475550839928	0.301840254686224	0.09290562199374477
mee-type_ddpm_quantileUni_lda_5.csv	mlp_128_64	0.06279069767441861	0.015600474261626442	0.04342015042885257	0.08216124491998465	0.03539429682750397	0.04024305956335034	-0.014574061409877943	0.08536265506488588	0.11236695588291719
mee-type_ddpm_quantileUni_lda_5.csv	mlp_128_64_es	0.06511627906976744	0.028003708322772783	0.0303450826291813	0.09988747551035358	0.0226316048709147	0.016287221188044786	0.0024083486909379156	0.042854861050891487	0.06783855341156507
mee-type_ddpm_quantileUni_lda_5.csv	mlp_128_64_alpha	0.046511627906976744	0.01644434374852436	0.026093278300346873	0.06692997751360662	0.042600422832980975	0.05091528464917922	-0.020619253074201746	0.1058200987401637	0.11448225465965048
