# Supplementary material for: Synthetic Data Generation for Classifying Electrophysiological and Morpho- Electrophysiological Neurons from Mouse Visual Cortex
Source: Research Square preprint supplement (doi:10.21203/rs.3.rs-7545694/v1), 2025-09-17
Supplement: Supplementary file 7 [file cf9d8d5b8e98f9062d43a94c.xlsx]

## Sheet: Feuil1
file	classifier	mean_test_accuracy	test_std	test_ci_low	test_ci_high	weighted_precision	prec_std	prec_ci_low	prec_ci_high	brier_score
e-type_vae_maxabs_lda_35.csv	svm_poly_3	0.2489247311827957	0.0358948986726892	0.2043553277817453	0.2934941345838461	0.5389682954254252	0.0165846848146031	0.5183756893695758	0.5595609014812747	0.0506941711094944
e-type_vae_maxabs_lda_35.csv	svm_poly_3	0.2489247311827957	0.0358948986726892	0.2043553277817453	0.2934941345838461	0.5389682954254252	0.0165846848146031	0.5183756893695758	0.5595609014812747	0.0506941711094944
e-type_vae_maxabs_lda_35.csv	svm_poly_3	0.2489247311827957	0.03589489867268922	0.20435532778174534	0.2934941345838461	0.5389682954254252	0.016584684814603148	0.5183756893695758	0.5595609014812747	0.050694171109494444
e-type_vae_maxabs_lda_35.csv	svm_rbf_3	0.2456989247311828	0.0198997371218513	0.2209901375732609	0.2704077118891046	0.4602102807909942	0.0398176594739451	0.4107701265294594	0.509650435052529	0.0495597833966843
e-type_vae_maxabs_lda_35.csv	svm_rbf_3	0.2456989247311828	0.0198997371218513	0.2209901375732609	0.2704077118891046	0.4602102807909942	0.0398176594739451	0.4107701265294594	0.509650435052529	0.0495597833966843
e-type_vae_maxabs_lda_35.csv	svm_rbf_3	0.2456989247311828	0.019899737121851335	0.22099013757326094	0.2704077118891046	0.4602102807909942	0.03981765947394516	0.4107701265294594	0.509650435052529	0.04955978339668434
e-type_vae_maxabs_lda_35.csv	logistic_l1_2	0.2290322580645161	0.0119313661404151	0.2142175102785752	0.243847005850457	0.4297630950136336	0.0584002887313973	0.3572495590111524	0.5022766310161149	0.0476708741498572
e-type_vae_maxabs_lda_35.csv	logistic_l1_2	0.2290322580645161	0.0119313661404151	0.2142175102785752	0.243847005850457	0.4297630950136336	0.0584002887313973	0.3572495590111524	0.5022766310161149	0.0476708741498572
e-type_vae_maxabs_lda_35.csv	logistic_l1_2	0.2290322580645161	0.011931366140415133	0.21421751027857522	0.243847005850457	0.42976309501363363	0.05840028873139736	0.3572495590111524	0.5022766310161149	0.047670874149857226
e-type_vae_maxabs_lda_35.csv	svm_rbf_1	0.22096774193548385	0.011148624383509517	0.20712489640898343	0.23481058746198427	0.4439942357185592	0.04666869480707472	0.38604739753345546	0.5019410739036629	0.05521173406481974
e-type_vae_maxabs_lda_35.csv	svm_rbf_bal	0.22096774193548385	0.011148624383509517	0.20712489640898343	0.23481058746198427	0.4439942357185592	0.04666869480707472	0.38604739753345546	0.5019410739036629	0.05525844109813503
e-type_vae_maxabs_lda_35.csv	svm_rbf_1	0.2209677419354838	0.0111486243835095	0.2071248964089834	0.2348105874619842	0.4439942357185592	0.0466686948070747	0.3860473975334554	0.5019410739036629	0.0552117340648197
e-type_vae_maxabs_lda_35.csv	svm_rbf_bal	0.2209677419354838	0.0111486243835095	0.2071248964089834	0.2348105874619842	0.4439942357185592	0.0466686948070747	0.3860473975334554	0.5019410739036629	0.055258441098135
e-type_vae_maxabs_lda_35.csv	svm_rbf_1	0.2209677419354838	0.0111486243835095	0.2071248964089834	0.2348105874619842	0.4439942357185592	0.0466686948070747	0.3860473975334554	0.5019410739036629	0.0552117340648197
e-type_vae_maxabs_lda_35.csv	svm_rbf_bal	0.2209677419354838	0.0111486243835095	0.2071248964089834	0.2348105874619842	0.4439942357185592	0.0466686948070747	0.3860473975334554	0.5019410739036629	0.055258441098135
e-type_vae_maxabs_lda_35.csv	lda	0.2161290322580645	0.0147971601554009	0.1977559312174479	0.2345021332986811	0.432154287767133	0.0376317394934834	0.3854283116482918	0.4788802638859742	0.0542114363793287
e-type_vae_maxabs_lda_35.csv	lda	0.2161290322580645	0.0147971601554009	0.1977559312174479	0.2345021332986811	0.432154287767133	0.0376317394934834	0.3854283116482918	0.4788802638859742	0.0542114363793287
e-type_vae_maxabs_lda_35.csv	lda	0.2161290322580645	0.01479716015540095	0.1977559312174479	0.23450213329868114	0.43215428776713305	0.037631739493483446	0.38542831164829183	0.47888026388597427	0.05421143637932875
e-type_vae_maxabs_lda_35.csv	logistic_l2_2	0.2139784946236559	0.0048833070227378	0.2079150681013466	0.2200419211459651	0.4364531232571116	0.0334295055457567	0.3949449097431923	0.477961336771031	0.0502038499045325
e-type_vae_maxabs_lda_35.csv	logistic_l2_2	0.2139784946236559	0.0048833070227378	0.2079150681013466	0.2200419211459651	0.4364531232571116	0.0334295055457567	0.3949449097431923	0.477961336771031	0.0502038499045325
e-type_vae_maxabs_lda_35.csv	logistic_l2_2	0.2139784946236559	0.004883307022737885	0.20791506810134663	0.22004192114596516	0.43645312325711166	0.033429505545756764	0.39494490974319235	0.477961336771031	0.05020384990453258
e-type_vae_maxabs_lda_35.csv	logistic_l1_1	0.21236559139784944	0.008915658038589786	0.2012953397910365	0.22343584300466238	0.43950749418607005	0.06831362077977382	0.3546849306768802	0.5243300576952599	0.05790976925648965
e-type_vae_maxabs_lda_35.csv	logistic_l1_balanced_1	0.21236559139784944	0.008915658038589786	0.2012953397910365	0.22343584300466238	0.43950749418607005	0.06831362077977382	0.3546849306768802	0.5243300576952599	0.057909825967769835
e-type_vae_maxabs_lda_35.csv	logistic_l1_1	0.2123655913978494	0.0089156580385897	0.2012953397910365	0.2234358430046623	0.43950749418607	0.0683136207797738	0.3546849306768802	0.5243300576952599	0.0579097692564896
e-type_vae_maxabs_lda_35.csv	logistic_l1_balanced_1	0.2123655913978494	0.0089156580385897	0.2012953397910365	0.2234358430046623	0.43950749418607	0.0683136207797738	0.3546849306768802	0.5243300576952599	0.0579098259677698
e-type_vae_maxabs_lda_35.csv	logistic_l1_1	0.2123655913978494	0.0089156580385897	0.2012953397910365	0.2234358430046623	0.43950749418607	0.0683136207797738	0.3546849306768802	0.5243300576952599	0.0579097692564896
e-type_vae_maxabs_lda_35.csv	logistic_l1_balanced_1	0.2123655913978494	0.0089156580385897	0.2012953397910365	0.2234358430046623	0.43950749418607	0.0683136207797738	0.3546849306768802	0.5243300576952599	0.0579098259677698
e-type_vae_maxabs_lda_35.csv	logistic_l2_3	0.20913978494623656	0.009949868560925675	0.19678539136727563	0.22149417852519748	0.433510808317242	0.07587138649054105	0.33930403921813357	0.5277175774163504	0.060166204183958585
e-type_vae_maxabs_lda_35.csv	logistic_l1_3	0.20913978494623656	0.009949868560925675	0.19678539136727563	0.22149417852519748	0.433501397798726	0.07586816322609473	0.33929863091103724	0.5277041646864147	0.06026105816987206
e-type_vae_maxabs_lda_35.csv	logistic_l2_3	0.2091397849462365	0.0099498685609256	0.1967853913672756	0.2214941785251974	0.433510808317242	0.075871386490541	0.3393040392181335	0.5277175774163504	0.0601662041839585
e-type_vae_maxabs_lda_35.csv	logistic_l1_3	0.2091397849462365	0.0099498685609256	0.1967853913672756	0.2214941785251974	0.433501397798726	0.0758681632260947	0.3392986309110372	0.5277041646864147	0.060261058169872
e-type_vae_maxabs_lda_35.csv	logistic_l2_3	0.2091397849462365	0.0099498685609256	0.1967853913672756	0.2214941785251974	0.433510808317242	0.075871386490541	0.3393040392181335	0.5277175774163504	0.0601662041839585
e-type_vae_maxabs_lda_35.csv	logistic_l1_3	0.2091397849462365	0.0099498685609256	0.1967853913672756	0.2214941785251974	0.433501397798726	0.0758681632260947	0.3392986309110372	0.5277041646864147	0.060261058169872
e-type_vae_maxabs_lda_35.csv	logistic_l2_1	0.2086021505376344	0.0108530264721432	0.1951263382956217	0.222077962779647	0.4367156285165834	0.059290566374153	0.3630966668166868	0.5103345902164802	0.0576410264153364
e-type_vae_maxabs_lda_35.csv	logistic_l2_balanced_1	0.2086021505376344	0.0108530264721432	0.1951263382956217	0.222077962779647	0.442122158720563	0.0643355185866709	0.3622390614857244	0.5220052559554016	0.0576407756575805
e-type_vae_maxabs_lda_35.csv	logistic_l2_1	0.2086021505376344	0.0108530264721432	0.1951263382956217	0.222077962779647	0.4367156285165834	0.059290566374153	0.3630966668166868	0.5103345902164802	0.0576410264153364
e-type_vae_maxabs_lda_35.csv	logistic_l2_balanced_1	0.2086021505376344	0.0108530264721432	0.1951263382956217	0.222077962779647	0.442122158720563	0.0643355185866709	0.3622390614857244	0.5220052559554016	0.0576407756575805
e-type_vae_maxabs_lda_35.csv	logistic_l2_1	0.2086021505376344	0.0108530264721432	0.19512633829562176	0.22207796277964703	0.43671562851658347	0.059290566374153066	0.3630966668166868	0.5103345902164802	0.05764102641533647
e-type_vae_maxabs_lda_35.csv	logistic_l2_balanced_1	0.2086021505376344	0.0108530264721432	0.19512633829562176	0.22207796277964703	0.442122158720563	0.06433551858667094	0.36223906148572443	0.5220052559554016	0.057640775657580565
e-type_vae_maxabs_lda_35.csv	mlp_128_64_es	0.2	0.0586674687770348	0.1271547161538122	0.2728452838461878	0.1723179090362977	0.1411894827934686	-0.0029919886733624	0.3476278067459579	0.0497752423437765
e-type_vae_maxabs_lda_35.csv	mlp_128_64_es	0.2	0.0586674687770348	0.1271547161538122	0.2728452838461878	0.1723179090362977	0.1411894827934686	-0.0029919886733624	0.3476278067459579	0.0497752423437765
e-type_vae_maxabs_lda_35.csv	mlp_128_64_es	0.2	0.05866746877703486	0.12715471615381227	0.2728452838461878	0.1723179090362977	0.14118948279346866	-0.002991988673362478	0.3476278067459579	0.049775242343776595
e-type_vae_maxabs_lda_35.csv	mlp_128_64	0.1978494623655914	0.0172755580785587	0.1763990238505667	0.219299900880616	0.3764505739987135	0.0621796627157307	0.2992443253841376	0.4536568226132894	0.0660858800684085
e-type_vae_maxabs_lda_35.csv	mlp_128_64	0.1978494623655914	0.0172755580785587	0.1763990238505667	0.219299900880616	0.3764505739987135	0.0621796627157307	0.2992443253841376	0.4536568226132894	0.0660858800684085
e-type_vae_maxabs_lda_35.csv	mlp_128_64	0.1978494623655914	0.017275558078558736	0.17639902385056677	0.21929990088061602	0.3764505739987135	0.062179662715730735	0.2992443253841376	0.45365682261328943	0.06608588006840854
e-type_vae_maxabs_lda_35.csv	svm_sigmoid	0.1967741935483871	0.0151351486669454	0.1779814243411792	0.2155669627555949	0.3864052764685141	0.0286488710769557	0.350833004663077	0.4219775482739512	0.0554838532694411
e-type_vae_maxabs_lda_35.csv	svm_sigmoid_bal	0.1967741935483871	0.0151351486669454	0.1779814243411792	0.2155669627555949	0.3864052764685141	0.0286488710769557	0.350833004663077	0.4219775482739512	0.0554267967878785
e-type_vae_maxabs_lda_35.csv	svm_sigmoid	0.1967741935483871	0.0151351486669454	0.1779814243411792	0.2155669627555949	0.3864052764685141	0.0286488710769557	0.350833004663077	0.4219775482739512	0.0554838532694411
e-type_vae_maxabs_lda_35.csv	svm_sigmoid_bal	0.1967741935483871	0.0151351486669454	0.1779814243411792	0.2155669627555949	0.3864052764685141	0.0286488710769557	0.350833004663077	0.4219775482739512	0.0554267967878785
e-type_vae_maxabs_lda_35.csv	svm_sigmoid	0.1967741935483871	0.015135148666945427	0.17798142434117922	0.21556696275559498	0.3864052764685141	0.028648871076955747	0.350833004663077	0.4219775482739512	0.05548385326944111
e-type_vae_maxabs_lda_35.csv	svm_sigmoid_bal	0.1967741935483871	0.015135148666945427	0.17798142434117922	0.21556696275559498	0.3864052764685141	0.028648871076955747	0.350833004663077	0.4219775482739512	0.055426796787878596
e-type_vae_maxabs_lda_35.csv	mlp_100_lr0.001	0.1956989247311828	0.0035049475296788	0.1913469575679873	0.2000508918943782	0.3687764252024643	0.0869938763172417	0.2607592609151539	0.4767935894897747	0.0628053572855877
e-type_vae_maxabs_lda_35.csv	mlp_100_lr0.001	0.1956989247311828	0.0035049475296788	0.1913469575679873	0.2000508918943782	0.3687764252024643	0.0869938763172417	0.2607592609151539	0.4767935894897747	0.0628053572855877
e-type_vae_maxabs_lda_35.csv	mlp_100_lr0.001	0.1956989247311828	0.00350494752967884	0.19134695756798736	0.20005089189437825	0.3687764252024643	0.08699387631724177	0.2607592609151539	0.4767935894897747	0.06280535728558775
e-type_vae_maxabs_lda_35.csv	mlp_128_64_alpha	0.19516129032258064	0.021970770690002746	0.1678809753440137	0.2224416053011476	0.36390623359681556	0.09592591968622936	0.24479847262783863	0.4830139945657925	0.0653561395525727
e-type_vae_maxabs_lda_35.csv	mlp_128_64_alpha	0.1951612903225806	0.0219707706900027	0.1678809753440137	0.2224416053011476	0.3639062335968155	0.0959259196862293	0.2447984726278386	0.4830139945657925	0.0653561395525727
e-type_vae_maxabs_lda_35.csv	mlp_128_64_alpha	0.1951612903225806	0.0219707706900027	0.1678809753440137	0.2224416053011476	0.3639062335968155	0.0959259196862293	0.2447984726278386	0.4830139945657925	0.0653561395525727
e-type_vae_maxabs_lda_35.csv	gaussian_nb	0.1924731182795699	0.0188747200876795	0.1690370578705247	0.215909178688615	0.3608687444062576	0.1126136556502985	0.2210404224791657	0.5006970663333494	0.0613922287506434
e-type_vae_maxabs_lda_35.csv	gaussian_nb	0.1924731182795699	0.0188747200876795	0.1690370578705247	0.215909178688615	0.3608687444062576	0.1126136556502985	0.2210404224791657	0.5006970663333494	0.0613922287506434
e-type_vae_maxabs_lda_35.csv	gaussian_nb	0.1924731182795699	0.01887472008767953	0.16903705787052478	0.215909178688615	0.3608687444062576	0.11261365565029854	0.22104042247916575	0.5006970663333494	0.06139222875064341
e-type_vae_maxabs_lda_35.csv	extra_tree_bal	0.18978494623655914	0.01925376836502149	0.16587823522795736	0.21369165724516093	0.42418787766171884	0.022459815513474306	0.3963003333323393	0.45207542199109835	0.06351798228969006
e-type_vae_maxabs_lda_35.csv	extra_tree_bal	0.1897849462365591	0.0192537683650214	0.1658782352279573	0.2136916572451609	0.4241878776617188	0.0224598155134743	0.3963003333323393	0.4520754219910983	0.06351798228969
e-type_vae_maxabs_lda_35.csv	extra_tree_bal	0.1897849462365591	0.0192537683650214	0.1658782352279573	0.2136916572451609	0.4241878776617188	0.0224598155134743	0.3963003333323393	0.4520754219910983	0.06351798228969
e-type_vae_maxabs_lda_35.csv	mlp_50x2_lr0.001	0.1881720430107527	0.0102362541745482	0.1754620547257531	0.2008820312957522	0.3789552740943719	0.1123577871059658	0.2394446549270507	0.5184658932616931	0.0656310412967444
e-type_vae_maxabs_lda_35.csv	mlp_50x2_lr0.001	0.1881720430107527	0.0102362541745482	0.1754620547257531	0.2008820312957522	0.3789552740943719	0.1123577871059658	0.2394446549270507	0.5184658932616931	0.0656310412967444
e-type_vae_maxabs_lda_35.csv	mlp_50x2_lr0.001	0.1881720430107527	0.010236254174548255	0.1754620547257531	0.20088203129575227	0.3789552740943719	0.11235778710596588	0.23944465492705072	0.5184658932616931	0.06563104129674444
e-type_vae_maxabs_lda_35.csv	extra_tree	0.18763440860215055	0.01162459586582776	0.1732005664218839	0.20206825078241722	0.40543226232110285	0.03579236936466915	0.36099016587058175	0.44987435877162396	0.06327149905123339
e-type_vae_maxabs_lda_35.csv	extra_tree	0.1876344086021505	0.0116245958658277	0.1732005664218839	0.2020682507824172	0.4054322623211028	0.0357923693646691	0.3609901658705817	0.4498743587716239	0.0632714990512333
e-type_vae_maxabs_lda_35.csv	extra_tree	0.1876344086021505	0.0116245958658277	0.1732005664218839	0.2020682507824172	0.4054322623211028	0.0357923693646691	0.3609901658705817	0.4498743587716239	0.0632714990512333
e-type_vae_maxabs_lda_35.csv	rf_bal_100_10	0.1849462365591398	0.0151351486669454	0.1661534673519319	0.2037390057663476	0.4368437726963654	0.0387913675748949	0.3886779281375293	0.4850096172552014	0.0609238082290613
e-type_vae_maxabs_lda_35.csv	rf_bal_100_10	0.1849462365591398	0.0151351486669454	0.1661534673519319	0.2037390057663476	0.4368437726963654	0.0387913675748949	0.3886779281375293	0.4850096172552014	0.0609238082290613
e-type_vae_maxabs_lda_35.csv	rf_bal_100_10	0.1849462365591398	0.015135148666945432	0.16615346735193193	0.20373900576634768	0.4368437726963654	0.03879136757489499	0.3886779281375293	0.4850096172552014	0.060923808229061314
e-type_vae_maxabs_lda_35.csv	rf_100_10	0.178494623655914	0.0105148425890365	0.1654387221663276	0.1915505251455003	0.4166413928136593	0.010009991702285	0.4042123464946136	0.4290704391327051	0.0609457407762551
e-type_vae_maxabs_lda_35.csv	rf_100_10	0.178494623655914	0.0105148425890365	0.1654387221663276	0.1915505251455003	0.4166413928136593	0.010009991702285	0.4042123464946136	0.4290704391327051	0.0609457407762551
e-type_vae_maxabs_lda_35.csv	rf_100_10	0.178494623655914	0.01051484258903653	0.16543872216632766	0.19155052514550036	0.41664139281365936	0.010009991702285012	0.40421234649461363	0.4290704391327051	0.0609457407762551
e-type_vae_maxabs_lda_35.csv	mlp_50_lr0.001	0.17795698924731185	0.01308673273616998	0.1617076643546949	0.19420631413992878	0.32106891769404006	0.09675225595751585	0.20093512472659675	0.44120271066148337	0.06161424074988149
e-type_vae_maxabs_lda_35.csv	mlp_50_lr0.001	0.1779569892473118	0.0130867327361699	0.1617076643546949	0.1942063141399287	0.32106891769404	0.0967522559575158	0.2009351247265967	0.4412027106614833	0.0616142407498814
e-type_vae_maxabs_lda_35.csv	mlp_50_lr0.001	0.1779569892473118	0.0130867327361699	0.1617076643546949	0.1942063141399287	0.32106891769404	0.0967522559575158	0.2009351247265967	0.4412027106614833	0.0616142407498814
e-type_vae_maxabs_lda_35.csv	rf_100_20	0.17688172043010755	0.014148061684882546	0.15931458159162276	0.19444885926859234	0.40532654234798837	0.05042517093075976	0.34271542299999286	0.4679376616959839	0.06238113764143651
e-type_vae_maxabs_lda_35.csv	rf_100_20	0.1768817204301075	0.0141480616848825	0.1593145815916227	0.1944488592685923	0.4053265423479883	0.0504251709307597	0.3427154229999928	0.4679376616959839	0.0623811376414365
e-type_vae_maxabs_lda_35.csv	rf_100_20	0.1768817204301075	0.0141480616848825	0.1593145815916227	0.1944488592685923	0.4053265423479883	0.0504251709307597	0.3427154229999928	0.4679376616959839	0.0623811376414365
e-type_vae_maxabs_lda_35.csv	rf_200_10	0.17580645161290326	0.012975826221663623	0.15969483534651513	0.1919180678792914	0.4200982779561607	0.028829918287255032	0.38430120634771975	0.4558953495646017	0.06056543499141005
e-type_vae_maxabs_lda_35.csv	rf_200_20	0.17580645161290323	0.010853026472143201	0.1623306393708906	0.18928226385491587	0.419505427710592	0.05224679240723092	0.3546324665569075	0.48437838886427653	0.062116282562899715
e-type_vae_maxabs_lda_35.csv	rf_200_10	0.1758064516129032	0.0129758262216636	0.1596948353465151	0.1919180678792914	0.4200982779561607	0.028829918287255	0.3843012063477197	0.4558953495646017	0.06056543499141
e-type_vae_maxabs_lda_35.csv	rf_200_20	0.1758064516129032	0.0108530264721432	0.1623306393708906	0.1892822638549158	0.419505427710592	0.0522467924072309	0.3546324665569075	0.4843783888642765	0.0621162825628997
e-type_vae_maxabs_lda_35.csv	rf_200_10	0.1758064516129032	0.0129758262216636	0.1596948353465151	0.1919180678792914	0.4200982779561607	0.028829918287255	0.3843012063477197	0.4558953495646017	0.06056543499141
e-type_vae_maxabs_lda_35.csv	rf_200_20	0.1758064516129032	0.0108530264721432	0.1623306393708906	0.1892822638549158	0.419505427710592	0.0522467924072309	0.3546324665569075	0.4843783888642765	0.0621162825628997
e-type_vae_maxabs_lda_35.csv	decision_tree	0.17473118279569894	0.04367762583137613	0.12049824727386434	0.22896411831753355	0.35869673716546424	0.05470182012021204	0.2907754564859785	0.42661801784494996	0.09709044908285895
e-type_vae_maxabs_lda_35.csv	svm_rbf_2	0.17473118279569894	0.018720951985462534	0.15148605070324878	0.1979763148881491	0.42092524150593286	0.04883029572418731	0.36029442128356615	0.48155606172829957	0.05702366715623097
e-type_vae_maxabs_lda_35.csv	decision_tree	0.1747311827956989	0.0436776258313761	0.1204982472738643	0.2289641183175335	0.3586967371654642	0.054701820120212	0.2907754564859785	0.4266180178449499	0.0970904490828589
e-type_vae_maxabs_lda_35.csv	svm_rbf_2	0.1747311827956989	0.0187209519854625	0.1514860507032487	0.1979763148881491	0.4209252415059328	0.0488302957241873	0.3602944212835661	0.4815560617282995	0.0570236671562309
e-type_vae_maxabs_lda_35.csv	decision_tree	0.1747311827956989	0.0436776258313761	0.1204982472738643	0.2289641183175335	0.3586967371654642	0.054701820120212	0.2907754564859785	0.4266180178449499	0.0970904490828589
e-type_vae_maxabs_lda_35.csv	svm_rbf_2	0.1747311827956989	0.0187209519854625	0.1514860507032487	0.1979763148881491	0.4209252415059328	0.0488302957241873	0.3602944212835661	0.4815560617282995	0.0570236671562309
e-type_vae_maxabs_lda_35.csv	rf_bal_200_20	0.17150537634408602	0.008793240448277494	0.1605871262519107	0.18242362643626134	0.38142178719569836	0.05276763409286456	0.3159021156721988	0.44694145871919794	0.06220902463629593
e-type_vae_maxabs_lda_35.csv	rf_bal_200_20	0.171505376344086	0.0087932404482774	0.1605871262519107	0.1824236264362613	0.3814217871956983	0.0527676340928645	0.3159021156721988	0.4469414587191979	0.0622090246362959
e-type_vae_maxabs_lda_35.csv	rf_bal_200_20	0.171505376344086	0.0087932404482774	0.1605871262519107	0.1824236264362613	0.3814217871956983	0.0527676340928645	0.3159021156721988	0.4469414587191979	0.0622090246362959
e-type_vae_maxabs_lda_35.csv	decision_tree_bal	0.16075268817204302	0.04148851961445263	0.10923788702800638	0.21226748931607967	0.34310949123684537	0.06728390750281188	0.25956548563213155	0.4266534968415592	0.09873497786211258
e-type_vae_maxabs_lda_35.csv	decision_tree_bal	0.160752688172043	0.0414885196144526	0.1092378870280063	0.2122674893160796	0.3431094912368453	0.0672839075028118	0.2595654856321315	0.4266534968415592	0.0987349778621125
e-type_vae_maxabs_lda_35.csv	decision_tree_bal	0.160752688172043	0.0414885196144526	0.1092378870280063	0.2122674893160796	0.3431094912368453	0.0672839075028118	0.2595654856321315	0.4266534968415592	0.0987349778621125
e-type_vae_maxabs_lda_35.csv	svm_rbf_auto	0.15483870967741936	0.008834234798470413	0.14386955837647974	0.16580786097835898	0.46381152205892884	0.012335968909538647	0.44849439358099374	0.47912865053686393	0.056202545136745774
e-type_vae_maxabs_lda_35.csv	svm_rbf_auto	0.1548387096774193	0.0088342347984704	0.1438695583764797	0.1658078609783589	0.4638115220589288	0.0123359689095386	0.4484943935809937	0.4791286505368639	0.0562025451367457
e-type_vae_maxabs_lda_35.csv	svm_rbf_auto	0.1548387096774193	0.0088342347984704	0.1438695583764797	0.1658078609783589	0.4638115220589288	0.0123359689095386	0.4484943935809937	0.4791286505368639	0.0562025451367457
e-type_vae_maxabs_lda_35.csv	svm_poly_4	0.09946236559139784	0.0552221467316509	0.03089501409118113	0.16802971709161457	0.3160707060914351	0.23790302314255227	0.02067508719149047	0.6114663249913798	0.05727790500298711
e-type_vae_maxabs_lda_35.csv	svm_poly_4	0.0994623655913978	0.0552221467316509	0.0308950140911811	0.1680297170916145	0.3160707060914351	0.2379030231425522	0.0206750871914904	0.6114663249913798	0.0572779050029871
e-type_vae_maxabs_lda_35.csv	svm_poly_4	0.0994623655913978	0.0552221467316509	0.0308950140911811	0.1680297170916145	0.3160707060914351	0.2379030231425522	0.0206750871914904	0.6114663249913798	0.0572779050029871
e-type_smote_maxabs_lda_5000.csv	extra_tree_bal	0.2924731182795699	0.0213705450691954	0.2659380818451589	0.3190081547139809	0.4395081584119953	0.0117218566770489	0.4249535509839993	0.4540627658399914	0.0612148513598987
e-type_smote_maxabs_lda_5000.csv	extra_tree_bal	0.2924731182795699	0.0213705450691954	0.2659380818451589	0.3190081547139809	0.4395081584119953	0.0117218566770489	0.4249535509839993	0.4540627658399914	0.0612148513598987
e-type_smote_maxabs_lda_5000.csv	extra_tree_bal	0.2924731182795699	0.021370545069195473	0.2659380818451589	0.3190081547139809	0.43950815841199536	0.011721856677048913	0.4249535509839993	0.45406276583999144	0.06121485135989879
e-type_smote_maxabs_lda_5000.csv	extra_tree	0.29032258064516125	0.024268104953316924	0.26018974841999715	0.32045541287032536	0.437364145640663	0.007819813739268992	0.4276545644479535	0.4470737268333725	0.06151036685641999
e-type_smote_maxabs_lda_5000.csv	extra_tree	0.2903225806451612	0.0242681049533169	0.2601897484199971	0.3204554128703253	0.437364145640663	0.0078198137392689	0.4276545644479535	0.4470737268333725	0.0615103668564199
e-type_smote_maxabs_lda_5000.csv	extra_tree	0.2903225806451612	0.0242681049533169	0.2601897484199971	0.3204554128703253	0.437364145640663	0.0078198137392689	0.4276545644479535	0.4470737268333725	0.0615103668564199
e-type_smote_maxabs_lda_5000.csv	rf_200_20	0.24408602150537634	0.002944744932823471	0.24042963773839646	0.24774240527235622	0.40938719409030844	0.0097456445379305	0.39728637812826895	0.42148801005234793	0.06762386619776166
e-type_smote_maxabs_lda_5000.csv	rf_bal_200_20	0.24408602150537634	0.0035049475296788403	0.2397340543421809	0.24843798866857178	0.4097826888470458	0.006306166748641112	0.4019525486285884	0.4176128290655031	0.06721003300582498
e-type_smote_maxabs_lda_5000.csv	rf_200_20	0.2440860215053763	0.0029447449328234	0.2404296377383964	0.2477424052723562	0.4093871940903084	0.0097456445379305	0.3972863781282689	0.4214880100523479	0.0676238661977616
e-type_smote_maxabs_lda_5000.csv	rf_bal_200_20	0.2440860215053763	0.0035049475296788	0.2397340543421809	0.2484379886685717	0.4097826888470458	0.0063061667486411	0.4019525486285884	0.4176128290655031	0.0672100330058249
e-type_smote_maxabs_lda_5000.csv	rf_200_20	0.2440860215053763	0.0029447449328234	0.2404296377383964	0.2477424052723562	0.4093871940903084	0.0097456445379305	0.3972863781282689	0.4214880100523479	0.0676238661977616
e-type_smote_maxabs_lda_5000.csv	rf_bal_200_20	0.2440860215053763	0.0035049475296788	0.2397340543421809	0.2484379886685717	0.4097826888470458	0.0063061667486411	0.4019525486285884	0.4176128290655031	0.0672100330058249
e-type_smote_maxabs_lda_5000.csv	rf_100_20	0.24301075268817204	0.0030649877018794004	0.2392050678038111	0.246816437572533	0.41440507484202077	0.003997269313897873	0.40944180944382913	0.4193683402402124	0.06723616371670563
e-type_smote_maxabs_lda_5000.csv	rf_100_20	0.243010752688172	0.0030649877018794	0.2392050678038111	0.246816437572533	0.4144050748420207	0.0039972693138978	0.4094418094438291	0.4193683402402124	0.0672361637167056
e-type_smote_maxabs_lda_5000.csv	rf_100_20	0.243010752688172	0.0030649877018794	0.2392050678038111	0.246816437572533	0.4144050748420207	0.0039972693138978	0.4094418094438291	0.4193683402402124	0.0672361637167056
e-type_smote_maxabs_lda_5000.csv	decision_tree_bal	0.2413978494623656	0.0064179227883404	0.2334289457928316	0.2493667531318995	0.4223805007240002	0.0194815588605603	0.3981909504579548	0.4465700509900456	0.089247311827957
e-type_smote_maxabs_lda_5000.csv	decision_tree_bal	0.2413978494623656	0.0064179227883404	0.2334289457928316	0.2493667531318995	0.4223805007240002	0.0194815588605603	0.3981909504579548	0.4465700509900456	0.089247311827957
e-type_smote_maxabs_lda_5000.csv	decision_tree_bal	0.2413978494623656	0.006417922788340498	0.23342894579283166	0.24936675313189952	0.4223805007240002	0.019481558860560386	0.3981909504579548	0.4465700509900456	0.089247311827957
e-type_smote_maxabs_lda_5000.csv	decision_tree	0.24086021505376345	0.007744548543488136	0.2312440879449728	0.2504763421625541	0.42172486952314825	0.016531416407267	0.4011984049309298	0.4422513341153667	0.08931056293485136
e-type_smote_maxabs_lda_5000.csv	decision_tree	0.2408602150537634	0.0077445485434881	0.2312440879449728	0.2504763421625541	0.4217248695231482	0.016531416407267	0.4011984049309298	0.4422513341153667	0.0893105629348513
e-type_smote_maxabs_lda_5000.csv	decision_tree	0.2408602150537634	0.0077445485434881	0.2312440879449728	0.2504763421625541	0.4217248695231482	0.016531416407267	0.4011984049309298	0.4422513341153667	0.0893105629348513
e-type_smote_maxabs_lda_5000.csv	svm_poly_3	0.23763440860215054	0.0014723724664117354	0.23580621671866062	0.23946260048564047	0.32985789348863936	0.007881396737391088	0.3200718469042602	0.3396439400730185	0.06811617767989328
e-type_smote_maxabs_lda_5000.csv	svm_poly_3	0.2376344086021505	0.0014723724664117	0.2358062167186606	0.2394626004856404	0.3298578934886393	0.007881396737391	0.3200718469042602	0.3396439400730185	0.0681161776798932
e-type_smote_maxabs_lda_5000.csv	svm_poly_3	0.2376344086021505	0.0014723724664117	0.2358062167186606	0.2394626004856404	0.3298578934886393	0.007881396737391	0.3200718469042602	0.3396439400730185	0.0681161776798932
e-type_smote_maxabs_lda_5000.csv	rf_200_10	0.2306451612903226	0.0048087483387092	0.2246743116017251	0.23661601097892	0.3595170384105372	0.0200421611144019	0.3346314085085848	0.3844026683124896	0.0606332107443321
e-type_smote_maxabs_lda_5000.csv	rf_bal_100_10	0.2306451612903226	0.0101298084308692	0.2180673428530112	0.2432229797276339	0.3567945698315741	0.0269823521656296	0.3232915545606563	0.3902975851024919	0.0603747854495579
e-type_smote_maxabs_lda_5000.csv	rf_200_10	0.2306451612903226	0.0048087483387092	0.2246743116017251	0.23661601097892	0.3595170384105372	0.0200421611144019	0.3346314085085848	0.3844026683124896	0.0606332107443321
e-type_smote_maxabs_lda_5000.csv	rf_bal_100_10	0.2306451612903226	0.0101298084308692	0.2180673428530112	0.2432229797276339	0.3567945698315741	0.0269823521656296	0.3232915545606563	0.3902975851024919	0.0603747854495579
e-type_smote_maxabs_lda_5000.csv	rf_200_10	0.2306451612903226	0.00480874833870923	0.22467431160172516	0.23661601097892002	0.3595170384105372	0.020042161114401952	0.33463140850858486	0.3844026683124896	0.060633210744332186
e-type_smote_maxabs_lda_5000.csv	rf_bal_100_10	0.2306451612903226	0.010129808430869235	0.21806734285301127	0.2432229797276339	0.3567945698315741	0.02698235216562967	0.3232915545606563	0.3902975851024919	0.06037478544955792
e-type_smote_maxabs_lda_5000.csv	mlp_128_64_alpha	0.228494623655914	0.0779569892473118	0.1316982366991687	0.3252910106126592	0.358321946391428	0.068586197318073	0.2731609344078769	0.4434829583749791	0.0693873250522468
e-type_smote_maxabs_lda_5000.csv	mlp_128_64_alpha	0.228494623655914	0.0779569892473118	0.1316982366991687	0.3252910106126592	0.358321946391428	0.068586197318073	0.2731609344078769	0.4434829583749791	0.0693873250522468
e-type_smote_maxabs_lda_5000.csv	mlp_128_64_alpha	0.228494623655914	0.07795698924731184	0.13169823669916875	0.32529101061265925	0.358321946391428	0.06858619731807308	0.2731609344078769	0.4434829583749791	0.06938732505224685
e-type_smote_maxabs_lda_5000.csv	rf_100_10	0.2279569892473118	0.0051708021671159	0.2215365903545699	0.2343773881400537	0.3497072958429649	0.0175816886889374	0.3278767459702849	0.3715378457156449	0.0608145095997854
e-type_smote_maxabs_lda_5000.csv	rf_100_10	0.2279569892473118	0.0051708021671159	0.2215365903545699	0.2343773881400537	0.3497072958429649	0.0175816886889374	0.3278767459702849	0.3715378457156449	0.0608145095997854
e-type_smote_maxabs_lda_5000.csv	rf_100_10	0.2279569892473118	0.005170802167115948	0.2215365903545699	0.2343773881400537	0.3497072958429649	0.017581688688937436	0.3278767459702849	0.3715378457156449	0.060814509599785446
e-type_smote_maxabs_lda_5000.csv	mlp_128_64_es	0.22096774193548385	0.049179591415712216	0.15990321382822298	0.2820322700427447	0.31969075737181185	0.08999540918512494	0.20794669778302566	0.43143481696059804	0.06754913499136392
e-type_smote_maxabs_lda_5000.csv	mlp_128_64_es	0.2209677419354838	0.0491795914157122	0.1599032138282229	0.2820322700427447	0.3196907573718118	0.0899954091851249	0.2079466977830256	0.431434816960598	0.0675491349913639
e-type_smote_maxabs_lda_5000.csv	mlp_128_64_es	0.2209677419354838	0.0491795914157122	0.1599032138282229	0.2820322700427447	0.3196907573718118	0.0899954091851249	0.2079466977830256	0.431434816960598	0.0675491349913639
e-type_smote_maxabs_lda_5000.csv	mlp_128_64	0.20967741935483875	0.07079136603367576	0.12177832876715859	0.2975765099425189	0.33392570972172503	0.062454650035933305	0.25637801925169107	0.411473400191759	0.07542867129720862
e-type_smote_maxabs_lda_5000.csv	mlp_128_64	0.2096774193548387	0.0707913660336757	0.1217783287671585	0.2975765099425189	0.333925709721725	0.0624546500359333	0.256378019251691	0.411473400191759	0.0754286712972086
e-type_smote_maxabs_lda_5000.csv	mlp_128_64	0.2096774193548387	0.0707913660336757	0.1217783287671585	0.2975765099425189	0.333925709721725	0.0624546500359333	0.256378019251691	0.411473400191759	0.0754286712972086
e-type_smote_maxabs_lda_5000.csv	logistic_l2_3	0.2032258064516129	0.0014723724664117	0.2013976145681229	0.2050539983351028	0.2199771854235483	0.0029455272272033	0.216319830309801	0.2236345405372957	0.0656654627013747
e-type_smote_maxabs_lda_5000.csv	logistic_l1_3	0.2032258064516129	0.0014723724664117	0.2013976145681229	0.2050539983351028	0.2199771854235483	0.0029455272272033	0.216319830309801	0.2236345405372957	0.0656681618964057
e-type_smote_maxabs_lda_5000.csv	logistic_l2_3	0.2032258064516129	0.0014723724664117	0.2013976145681229	0.2050539983351028	0.2199771854235483	0.0029455272272033	0.216319830309801	0.2236345405372957	0.0656654627013747
e-type_smote_maxabs_lda_5000.csv	logistic_l1_3	0.2032258064516129	0.0014723724664117	0.2013976145681229	0.2050539983351028	0.2199771854235483	0.0029455272272033	0.216319830309801	0.2236345405372957	0.0656681618964057
e-type_smote_maxabs_lda_5000.csv	logistic_l2_3	0.2032258064516129	0.0014723724664117508	0.20139761456812294	0.20505399833510285	0.21997718542354838	0.0029455272272033584	0.216319830309801	0.22363454053729576	0.0656654627013747
e-type_smote_maxabs_lda_5000.csv	logistic_l1_3	0.2032258064516129	0.0014723724664117508	0.20139761456812294	0.20505399833510285	0.21997718542354838	0.0029455272272033584	0.216319830309801	0.22363454053729576	0.06566816189640572
e-type_smote_maxabs_lda_5000.csv	logistic_l2_1	0.20268817204301076	0.0014723724664117508	0.2008599801595208	0.20451636392650072	0.21983027301750244	0.0028245444405573896	0.2163231378743357	0.22333740816066916	0.0656174237090374
e-type_smote_maxabs_lda_5000.csv	logistic_l1_1	0.20268817204301076	0.0014723724664117508	0.2008599801595208	0.20451636392650072	0.21983027301750244	0.0028245444405573896	0.2163231378743357	0.22333740816066916	0.0656445204985304
e-type_smote_maxabs_lda_5000.csv	logistic_l2_balanced_1	0.20268817204301076	0.0014723724664117508	0.2008599801595208	0.20451636392650072	0.21983027301750244	0.0028245444405573896	0.2163231378743357	0.22333740816066916	0.06561741215413297
e-type_smote_maxabs_lda_5000.csv	logistic_l1_balanced_1	0.20268817204301076	0.0014723724664117508	0.2008599801595208	0.20451636392650072	0.21983027301750244	0.0028245444405573896	0.2163231378743357	0.22333740816066916	0.0656445246600506
e-type_smote_maxabs_lda_5000.csv	logistic_l2_1	0.2026881720430107	0.0014723724664117	0.2008599801595208	0.2045163639265007	0.2198302730175024	0.0028245444405573	0.2163231378743357	0.2233374081606691	0.0656174237090374
e-type_smote_maxabs_lda_5000.csv	logistic_l1_1	0.2026881720430107	0.0014723724664117	0.2008599801595208	0.2045163639265007	0.2198302730175024	0.0028245444405573	0.2163231378743357	0.2233374081606691	0.0656445204985304
e-type_smote_maxabs_lda_5000.csv	logistic_l2_balanced_1	0.2026881720430107	0.0014723724664117	0.2008599801595208	0.2045163639265007	0.2198302730175024	0.0028245444405573	0.2163231378743357	0.2233374081606691	0.0656174121541329
e-type_smote_maxabs_lda_5000.csv	logistic_l1_balanced_1	0.2026881720430107	0.0014723724664117	0.2008599801595208	0.2045163639265007	0.2198302730175024	0.0028245444405573	0.2163231378743357	0.2233374081606691	0.0656445246600506
e-type_smote_maxabs_lda_5000.csv	logistic_l2_1	0.2026881720430107	0.0014723724664117	0.2008599801595208	0.2045163639265007	0.2198302730175024	0.0028245444405573	0.2163231378743357	0.2233374081606691	0.0656174237090374
e-type_smote_maxabs_lda_5000.csv	logistic_l1_1	0.2026881720430107	0.0014723724664117	0.2008599801595208	0.2045163639265007	0.2198302730175024	0.0028245444405573	0.2163231378743357	0.2233374081606691	0.0656445204985304
e-type_smote_maxabs_lda_5000.csv	logistic_l2_balanced_1	0.2026881720430107	0.0014723724664117	0.2008599801595208	0.2045163639265007	0.2198302730175024	0.0028245444405573	0.2163231378743357	0.2233374081606691	0.0656174121541329
e-type_smote_maxabs_lda_5000.csv	logistic_l1_balanced_1	0.2026881720430107	0.0014723724664117	0.2008599801595208	0.2045163639265007	0.2198302730175024	0.0028245444405573	0.2163231378743357	0.2233374081606691	0.0656445246600506
e-type_smote_maxabs_lda_5000.csv	logistic_l1_2	0.2021505376344086	0.0022490860928335	0.1993579284040764	0.2049431468647408	0.2196945891469664	0.0030267161854707	0.2159364246266868	0.2234527536672461	0.0654171864795921
e-type_smote_maxabs_lda_5000.csv	logistic_l1_2	0.2021505376344086	0.0022490860928335	0.1993579284040764	0.2049431468647408	0.2196945891469664	0.0030267161854707	0.2159364246266868	0.2234527536672461	0.0654171864795921
e-type_smote_maxabs_lda_5000.csv	logistic_l1_2	0.2021505376344086	0.0022490860928335477	0.1993579284040764	0.2049431468647408	0.21969458914696646	0.003026716185470718	0.21593642462668683	0.2234527536672461	0.06541718647959213
e-type_smote_maxabs_lda_5000.csv	mlp_100_lr0.001	0.2010752688172043	0.0580109769096885	0.129045127287814	0.2731054103465946	0.366458257088648	0.0616888718928886	0.2898614057694439	0.4430551084078521	0.0671485345372048
e-type_smote_maxabs_lda_5000.csv	mlp_50x2_lr0.001	0.2010752688172043	0.0325035462369717	0.160716785640805	0.2414337519936035	0.3158648615373246	0.0690227514072088	0.230161796058025	0.4015679270166242	0.0689526638114631
e-type_smote_maxabs_lda_5000.csv	mlp_100_lr0.001	0.2010752688172043	0.0580109769096885	0.129045127287814	0.2731054103465946	0.366458257088648	0.0616888718928886	0.2898614057694439	0.4430551084078521	0.0671485345372048
e-type_smote_maxabs_lda_5000.csv	mlp_50x2_lr0.001	0.2010752688172043	0.0325035462369717	0.160716785640805	0.2414337519936035	0.3158648615373246	0.0690227514072088	0.230161796058025	0.4015679270166242	0.0689526638114631
e-type_smote_maxabs_lda_5000.csv	mlp_100_lr0.001	0.2010752688172043	0.058010976909688546	0.12904512728781403	0.2731054103465946	0.36645825708864804	0.06168887189288867	0.28986140576944397	0.4430551084078521	0.06714853453720482
e-type_smote_maxabs_lda_5000.csv	mlp_50x2_lr0.001	0.2010752688172043	0.0325035462369717	0.16071678564080505	0.24143375199360356	0.3158648615373246	0.06902275140720888	0.230161796058025	0.40156792701662425	0.06895266381146319
e-type_smote_maxabs_lda_5000.csv	logistic_l2_2	0.1989247311827957	0.0019008246806089	0.1965645456099863	0.201284916755605	0.2149672014776366	0.0016569542466645	0.2129098210428823	0.2170245819123908	0.0651805326507016
e-type_smote_maxabs_lda_5000.csv	logistic_l2_2	0.1989247311827957	0.0019008246806089	0.1965645456099863	0.201284916755605	0.2149672014776366	0.0016569542466645	0.2129098210428823	0.2170245819123908	0.0651805326507016
e-type_smote_maxabs_lda_5000.csv	logistic_l2_2	0.1989247311827957	0.001900824680608997	0.19656454560998632	0.20128491675560506	0.21496720147763662	0.0016569542466645748	0.21290982104288236	0.21702458191239088	0.06518053265070164
e-type_smote_maxabs_lda_5000.csv	lda	0.19838709677419356	0.0035049475296788403	0.1940351296109981	0.202739063937389	0.22070875509488297	0.00507044433210859	0.2144129669128074	0.22700454327695854	0.0597213710623898
e-type_smote_maxabs_lda_5000.csv	lda	0.1983870967741935	0.0035049475296788	0.1940351296109981	0.202739063937389	0.2207087550948829	0.0050704443321085	0.2144129669128074	0.2270045432769585	0.0597213710623898
e-type_smote_maxabs_lda_5000.csv	lda	0.1983870967741935	0.0035049475296788	0.1940351296109981	0.202739063937389	0.2207087550948829	0.0050704443321085	0.2144129669128074	0.2270045432769585	0.0597213710623898
e-type_smote_maxabs_lda_5000.csv	svm_sigmoid	0.19086021505376344	0.001900824680608997	0.18850002948095407	0.1932204006265728	0.35547626359936946	0.007801619286254557	0.345789273803935	0.36516325339480393	0.055699790323304924
e-type_smote_maxabs_lda_5000.csv	svm_sigmoid_bal	0.19086021505376344	0.001900824680608997	0.18850002948095407	0.1932204006265728	0.35547626359936946	0.007801619286254557	0.345789273803935	0.36516325339480393	0.055697468596968905
e-type_smote_maxabs_lda_5000.csv	svm_sigmoid	0.1908602150537634	0.0019008246806089	0.188500029480954	0.1932204006265728	0.3554762635993694	0.0078016192862545	0.345789273803935	0.3651632533948039	0.0556997903233049
e-type_smote_maxabs_lda_5000.csv	svm_sigmoid_bal	0.1908602150537634	0.0019008246806089	0.188500029480954	0.1932204006265728	0.3554762635993694	0.0078016192862545	0.345789273803935	0.3651632533948039	0.0556974685969689
e-type_smote_maxabs_lda_5000.csv	svm_sigmoid	0.1908602150537634	0.0019008246806089	0.188500029480954	0.1932204006265728	0.3554762635993694	0.0078016192862545	0.345789273803935	0.3651632533948039	0.0556997903233049
e-type_smote_maxabs_lda_5000.csv	svm_sigmoid_bal	0.1908602150537634	0.0019008246806089	0.188500029480954	0.1932204006265728	0.3554762635993694	0.0078016192862545	0.345789273803935	0.3651632533948039	0.0556974685969689
e-type_smote_maxabs_lda_5000.csv	mlp_50_lr0.001	0.19032258064516128	0.08740487123600248	0.08179509876378106	0.2988500625265415	0.2602345670855125	0.11401133922601532	0.11867079178157242	0.4017983423894526	0.0674749386990979
e-type_smote_maxabs_lda_5000.csv	mlp_50_lr0.001	0.1903225806451612	0.0874048712360024	0.081795098763781	0.2988500625265415	0.2602345670855125	0.1140113392260153	0.1186707917815724	0.4017983423894526	0.0674749386990979
e-type_smote_maxabs_lda_5000.csv	mlp_50_lr0.001	0.1903225806451612	0.0874048712360024	0.081795098763781	0.2988500625265415	0.2602345670855125	0.1140113392260153	0.1186707917815724	0.4017983423894526	0.0674749386990979
e-type_smote_maxabs_lda_5000.csv	svm_poly_4	0.17365591397849464	0.003606561254031924	0.16917777671204656	0.17813405124494272	0.4787125754658061	0.00038636979988852094	0.4782328339952913	0.47919231693632086	0.07149211255343883
e-type_smote_maxabs_lda_5000.csv	svm_poly_4	0.1736559139784946	0.0036065612540319	0.1691777767120465	0.1781340512449427	0.4787125754658061	0.0003863697998885	0.4782328339952913	0.4791923169363208	0.0714921125534388
e-type_smote_maxabs_lda_5000.csv	svm_poly_4	0.1736559139784946	0.0036065612540319	0.1691777767120465	0.1781340512449427	0.4787125754658061	0.0003863697998885	0.4782328339952913	0.4791923169363208	0.0714921125534388
e-type_smote_maxabs_lda_5000.csv	gaussian_nb	0.15806451612903225	0.0012021870846773053	0.1565718037068829	0.1595572285511816	0.17771020218001815	0.0019566920568582346	0.175280648097446	0.1801397562625903	0.06349907351565326
e-type_smote_maxabs_lda_5000.csv	gaussian_nb	0.1580645161290322	0.0012021870846773	0.1565718037068829	0.1595572285511816	0.1777102021800181	0.0019566920568582	0.175280648097446	0.1801397562625903	0.0634990735156532
e-type_smote_maxabs_lda_5000.csv	gaussian_nb	0.1580645161290322	0.0012021870846773	0.1565718037068829	0.1595572285511816	0.1777102021800181	0.0019566920568582	0.175280648097446	0.1801397562625903	0.0634990735156532
e-type_smote_maxabs_lda_5000.csv	svm_rbf_3	0.15376344086021504	0.0035049475296788403	0.1494114736970196	0.15811540802341048	0.1587707026253783	0.00560259820600859	0.15181415813657642	0.16572724711418016	0.06673522694771439
e-type_smote_maxabs_lda_5000.csv	svm_rbf_3	0.153763440860215	0.0035049475296788	0.1494114736970196	0.1581154080234104	0.1587707026253783	0.0056025982060085	0.1518141581365764	0.1657272471141801	0.0667352269477143
e-type_smote_maxabs_lda_5000.csv	svm_rbf_3	0.153763440860215	0.0035049475296788	0.1494114736970196	0.1581154080234104	0.1587707026253783	0.0056025982060085	0.1518141581365764	0.1657272471141801	0.0667352269477143
e-type_smote_maxabs_lda_5000.csv	svm_rbf_2	0.15053763440860216	0.0032923249230956664	0.1464496730812053	0.15462559573599902	0.2184404486286904	0.01653275706176539	0.19791231939404721	0.23896857786333356	0.06542389919599598
e-type_smote_maxabs_lda_5000.csv	svm_rbf_2	0.1505376344086021	0.0032923249230956	0.1464496730812053	0.154625595735999	0.2184404486286904	0.0165327570617653	0.1979123193940472	0.2389685778633335	0.0654238991959959
e-type_smote_maxabs_lda_5000.csv	svm_rbf_2	0.1505376344086021	0.0032923249230956	0.1464496730812053	0.154625595735999	0.2184404486286904	0.0165327570617653	0.1979123193940472	0.2389685778633335	0.0654238991959959
e-type_smote_maxabs_lda_5000.csv	svm_rbf_auto	0.1478494623655914	0.0063043222578271	0.1400216123849727	0.1556773123462101	0.2844620369577096	0.022097099763978	0.2570248637160611	0.3118992101993582	0.0634346944764557
e-type_smote_maxabs_lda_5000.csv	svm_rbf_auto	0.1478494623655914	0.0063043222578271	0.1400216123849727	0.1556773123462101	0.2844620369577096	0.022097099763978	0.2570248637160611	0.3118992101993582	0.0634346944764557
e-type_smote_maxabs_lda_5000.csv	svm_rbf_auto	0.1478494623655914	0.006304322257827185	0.1400216123849727	0.1556773123462101	0.28446203695770966	0.022097099763978088	0.25702486371606115	0.3118992101993582	0.06343469447645574
e-type_smote_maxabs_lda_5000.csv	svm_rbf_1	0.13118279569892471	0.0044171173992352064	0.1256982200484549	0.13666737134939452	0.17552739908266982	0.009050817101042738	0.16428932533397805	0.18676547283136158	0.06475168232502863
e-type_smote_maxabs_lda_5000.csv	svm_rbf_bal	0.13118279569892471	0.0044171173992352064	0.1256982200484549	0.13666737134939452	0.17552739908266982	0.009050817101042738	0.16428932533397805	0.18676547283136158	0.06472984548896009
e-type_smote_maxabs_lda_5000.csv	svm_rbf_1	0.1311827956989247	0.0044171173992352	0.1256982200484549	0.1366673713493945	0.1755273990826698	0.0090508171010427	0.164289325333978	0.1867654728313615	0.0647516823250286
e-type_smote_maxabs_lda_5000.csv	svm_rbf_bal	0.1311827956989247	0.0044171173992352	0.1256982200484549	0.1366673713493945	0.1755273990826698	0.0090508171010427	0.164289325333978	0.1867654728313615	0.06472984548896
e-type_smote_maxabs_lda_5000.csv	svm_rbf_1	0.1311827956989247	0.0044171173992352	0.1256982200484549	0.1366673713493945	0.1755273990826698	0.0090508171010427	0.164289325333978	0.1867654728313615	0.0647516823250286
e-type_smote_maxabs_lda_5000.csv	svm_rbf_bal	0.1311827956989247	0.0044171173992352	0.1256982200484549	0.1366673713493945	0.1755273990826698	0.0090508171010427	0.164289325333978	0.1867654728313615	0.06472984548896
e-type_smote_maxabs_lda_2000.csv	extra_tree_bal	0.29999999999999993	0.024972525080631372	0.26899251466313934	0.33100748533686053	0.4498390663768572	0.009244733374534035	0.4383602137727055	0.46131791898100893	0.05988571790006325
e-type_smote_maxabs_lda_2000.csv	extra_tree_bal	0.2999999999999999	0.0249725250806313	0.2689925146631393	0.3310074853368605	0.4498390663768572	0.009244733374534	0.4383602137727055	0.4613179189810089	0.0598857179000632
e-type_smote_maxabs_lda_2000.csv	extra_tree_bal	0.2999999999999999	0.0249725250806313	0.2689925146631393	0.3310074853368605	0.4498390663768572	0.009244733374534	0.4383602137727055	0.4613179189810089	0.0598857179000632
e-type_smote_maxabs_lda_2000.csv	extra_tree	0.29247311827956984	0.018565910376163453	0.2694204957716099	0.31552574078752976	0.45209885496107577	0.011226830268404181	0.43815890400285396	0.4660388059192976	0.060063440860215055
e-type_smote_maxabs_lda_2000.csv	extra_tree	0.2924731182795698	0.0185659103761634	0.2694204957716099	0.3155257407875297	0.4520988549610757	0.0112268302684041	0.4381589040028539	0.4660388059192976	0.060063440860215
e-type_smote_maxabs_lda_2000.csv	extra_tree	0.2924731182795698	0.0185659103761634	0.2694204957716099	0.3155257407875297	0.4520988549610757	0.0112268302684041	0.4381589040028539	0.4660388059192976	0.060063440860215
e-type_smote_maxabs_lda_2000.csv	svm_poly_3	0.24946236559139784	0.002944744932823471	0.24580598182441796	0.2531187493583777	0.37437934855538063	0.02197324277191438	0.3470959640817034	0.40166273302905786	0.06619771080869155
e-type_smote_maxabs_lda_2000.csv	svm_poly_3	0.2494623655913978	0.0029447449328234	0.2458059818244179	0.2531187493583777	0.3743793485553806	0.0219732427719143	0.3470959640817034	0.4016627330290578	0.0661977108086915
e-type_smote_maxabs_lda_2000.csv	svm_poly_3	0.2494623655913978	0.0029447449328234	0.2458059818244179	0.2531187493583777	0.3743793485553806	0.0219732427719143	0.3470959640817034	0.4016627330290578	0.0661977108086915
e-type_smote_maxabs_lda_2000.csv	rf_200_20	0.2456989247311828	0.009036417373103	0.2344787306062577	0.2569191188561078	0.4148618159931194	0.0166478783882919	0.3941907447519028	0.4355328872343361	0.0652344413940696
e-type_smote_maxabs_lda_2000.csv	rf_bal_200_20	0.2456989247311828	0.0077445485434881	0.2360827976223921	0.2553150518399734	0.4160817079516311	0.0146489939233803	0.397892579587064	0.4342708363161981	0.0654087810600485
e-type_smote_maxabs_lda_2000.csv	rf_200_20	0.2456989247311828	0.009036417373103	0.2344787306062577	0.2569191188561078	0.4148618159931194	0.0166478783882919	0.3941907447519028	0.4355328872343361	0.0652344413940696
e-type_smote_maxabs_lda_2000.csv	rf_bal_200_20	0.2456989247311828	0.0077445485434881	0.2360827976223921	0.2553150518399734	0.4160817079516311	0.0146489939233803	0.397892579587064	0.4342708363161981	0.0654087810600485
e-type_smote_maxabs_lda_2000.csv	rf_200_20	0.2456989247311828	0.009036417373103017	0.23447873060625773	0.25691911885610785	0.41486181599311944	0.016647878388291956	0.3941907447519028	0.4355328872343361	0.06523444139406968
e-type_smote_maxabs_lda_2000.csv	rf_bal_200_20	0.2456989247311828	0.00774454854348814	0.23608279762239215	0.25531505183997344	0.4160817079516311	0.014648993923380324	0.397892579587064	0.43427083631619817	0.06540878106004858
e-type_smote_maxabs_lda_2000.csv	rf_100_20	0.2403225806451613	0.0072630409065087	0.2313043242340681	0.2493408370562544	0.4045226284418127	0.0081195017607331	0.3944409354221583	0.4146043214614672	0.0655317505895262
e-type_smote_maxabs_lda_2000.csv	rf_100_20	0.2403225806451613	0.0072630409065087	0.2313043242340681	0.2493408370562544	0.4045226284418127	0.0081195017607331	0.3944409354221583	0.4146043214614672	0.0655317505895262
e-type_smote_maxabs_lda_2000.csv	rf_100_20	0.2403225806451613	0.007263040906508764	0.2313043242340681	0.24934083705625448	0.40452262844181275	0.008119501760733146	0.3944409354221583	0.4146043214614672	0.06553175058952629
e-type_smote_maxabs_lda_2000.csv	decision_tree	0.2349462365591398	0.0116556362304724	0.2204738526756026	0.2494186204426769	0.3846329911395377	0.0136454967644736	0.3676898690694848	0.4015761132095906	0.0900063251106894
e-type_smote_maxabs_lda_2000.csv	decision_tree	0.2349462365591398	0.0116556362304724	0.2204738526756026	0.2494186204426769	0.3846329911395377	0.0136454967644736	0.3676898690694848	0.4015761132095906	0.0900063251106894
e-type_smote_maxabs_lda_2000.csv	decision_tree	0.2349462365591398	0.011655636230472477	0.22047385267560266	0.24941862044267693	0.38463299113953775	0.013645496764473651	0.36768986906948486	0.40157611320959063	0.09000632511068943
e-type_smote_maxabs_lda_2000.csv	mlp_50x2_lr0.001	0.23333333333333334	0.08072129023205679	0.13310461336363105	0.3335620533030356	0.3634451078343298	0.10664166385816228	0.23103199311310194	0.49585822255555767	0.06646642338507834
e-type_smote_maxabs_lda_2000.csv	mlp_50x2_lr0.001	0.2333333333333333	0.0807212902320567	0.133104613363631	0.3335620533030356	0.3634451078343298	0.1066416638581622	0.2310319931131019	0.4958582225555576	0.0664664233850783
e-type_smote_maxabs_lda_2000.csv	mlp_50x2_lr0.001	0.2333333333333333	0.0807212902320567	0.133104613363631	0.3335620533030356	0.3634451078343298	0.1066416638581622	0.2310319931131019	0.4958582225555576	0.0664664233850783
e-type_smote_maxabs_lda_2000.csv	decision_tree_bal	0.23118279569892475	0.01624065319031528	0.2110173613251971	0.2513482300726524	0.3893433199152752	0.015767325787039474	0.3697655991375584	0.408921040692992	0.09044908285895002
e-type_smote_maxabs_lda_2000.csv	decision_tree_bal	0.2311827956989247	0.0162406531903152	0.2110173613251971	0.2513482300726524	0.3893433199152752	0.0157673257870394	0.3697655991375584	0.408921040692992	0.09044908285895
e-type_smote_maxabs_lda_2000.csv	decision_tree_bal	0.2311827956989247	0.0162406531903152	0.2110173613251971	0.2513482300726524	0.3893433199152752	0.0157673257870394	0.3697655991375584	0.408921040692992	0.09044908285895
e-type_smote_maxabs_lda_2000.csv	mlp_128_64_alpha	0.22580645161290325	0.07821148669879655	0.12869406433301483	0.32291883889279166	0.3213988791770113	0.07618134054435978	0.22680725128817886	0.4159905070658438	0.06767660073991466
e-type_smote_maxabs_lda_2000.csv	mlp_128_64_alpha	0.2258064516129032	0.0782114866987965	0.1286940643330148	0.3229188388927916	0.3213988791770113	0.0761813405443597	0.2268072512881788	0.4159905070658438	0.0676766007399146
e-type_smote_maxabs_lda_2000.csv	mlp_128_64_alpha	0.2258064516129032	0.0782114866987965	0.1286940643330148	0.3229188388927916	0.3213988791770113	0.0761813405443597	0.2268072512881788	0.4159905070658438	0.0676766007399146
e-type_smote_maxabs_lda_2000.csv	rf_200_10	0.2236559139784946	0.0083722642486007	0.2132603748775585	0.2340514530794306	0.3355622290396328	0.0130969270750621	0.3193002462034279	0.3518242118758376	0.0602986896096476
e-type_smote_maxabs_lda_2000.csv	rf_200_10	0.2236559139784946	0.0083722642486007	0.2132603748775585	0.2340514530794306	0.3355622290396328	0.0130969270750621	0.3193002462034279	0.3518242118758376	0.0602986896096476
e-type_smote_maxabs_lda_2000.csv	rf_200_10	0.2236559139784946	0.008372264248600766	0.21326037487755853	0.23405145307943068	0.3355622290396328	0.013096927075062154	0.31930024620342795	0.3518242118758376	0.06029868960964761
e-type_smote_maxabs_lda_2000.csv	rf_100_10	0.22096774193548385	0.012807665859754402	0.20506492433640333	0.23687055953456437	0.3305127084045181	0.011728034865366454	0.31595042974251397	0.3450749870665222	0.060594717212242445
e-type_smote_maxabs_lda_2000.csv	rf_100_10	0.2209677419354838	0.0128076658597544	0.2050649243364033	0.2368705595345643	0.3305127084045181	0.0117280348653664	0.3159504297425139	0.3450749870665222	0.0605947172122424
e-type_smote_maxabs_lda_2000.csv	rf_100_10	0.2209677419354838	0.0128076658597544	0.2050649243364033	0.2368705595345643	0.3305127084045181	0.0117280348653664	0.3159504297425139	0.3450749870665222	0.0605947172122424
e-type_smote_maxabs_lda_2000.csv	rf_bal_100_10	0.2182795698924731	0.0148945109432205	0.1997855918834241	0.236773547901522	0.3292100815026273	0.0285850347612533	0.2937170729521759	0.3647030900530788	0.0604151062503519
e-type_smote_maxabs_lda_2000.csv	rf_bal_100_10	0.2182795698924731	0.0148945109432205	0.1997855918834241	0.236773547901522	0.3292100815026273	0.0285850347612533	0.2937170729521759	0.3647030900530788	0.0604151062503519
e-type_smote_maxabs_lda_2000.csv	rf_bal_100_10	0.2182795698924731	0.014894510943220501	0.19978559188342418	0.23677354790152202	0.32921008150262737	0.028585034761253326	0.2937170729521759	0.3647030900530788	0.060415106250351944
e-type_smote_maxabs_lda_2000.csv	mlp_128_64	0.2139784946236559	0.0531755492065128	0.147952329589216	0.2800046596580957	0.3362801541050599	0.0709813722686129	0.248145139616024	0.4244151685940958	0.0679183900031068
e-type_smote_maxabs_lda_2000.csv	mlp_128_64	0.2139784946236559	0.0531755492065128	0.147952329589216	0.2800046596580957	0.3362801541050599	0.0709813722686129	0.248145139616024	0.4244151685940958	0.0679183900031068
e-type_smote_maxabs_lda_2000.csv	mlp_128_64	0.2139784946236559	0.05317554920651284	0.14795232958921606	0.28000465965809573	0.3362801541050599	0.07098137226861291	0.24814513961602402	0.4244151685940958	0.0679183900031068
e-type_smote_maxabs_lda_2000.csv	logistic_l2_3	0.20591397849462365	0.0014723724664117354	0.20408578661113372	0.20774217037811357	0.22408231663919959	0.002697853249926829	0.22073248938632842	0.22743214389207075	0.06535889081604188
e-type_smote_maxabs_lda_2000.csv	logistic_l1_1	0.20591397849462365	0.0014723724664117354	0.20408578661113372	0.20774217037811357	0.2236235163314814	0.0024192346833318643	0.2206196397219823	0.22662739294098047	0.0653041591737845
e-type_smote_maxabs_lda_2000.csv	logistic_l1_3	0.20591397849462365	0.0014723724664117354	0.20408578661113372	0.20774217037811357	0.22294607690914608	0.004678421003253427	0.21713704998096595	0.22875510383732622	0.06536561801155713
e-type_smote_maxabs_lda_2000.csv	logistic_l1_balanced_1	0.20591397849462365	0.0014723724664117354	0.20408578661113372	0.20774217037811357	0.2236235163314814	0.0024192346833318643	0.2206196397219823	0.22662739294098047	0.06530415187066901
e-type_smote_maxabs_lda_2000.csv	logistic_l2_3	0.2059139784946236	0.0014723724664117	0.2040857866111337	0.2077421703781135	0.2240823166391995	0.0026978532499268	0.2207324893863284	0.2274321438920707	0.0653588908160418
e-type_smote_maxabs_lda_2000.csv	logistic_l1_1	0.2059139784946236	0.0014723724664117	0.2040857866111337	0.2077421703781135	0.2236235163314814	0.0024192346833318	0.2206196397219823	0.2266273929409804	0.0653041591737845
e-type_smote_maxabs_lda_2000.csv	logistic_l1_3	0.2059139784946236	0.0014723724664117	0.2040857866111337	0.2077421703781135	0.222946076909146	0.0046784210032534	0.2171370499809659	0.2287551038373262	0.0653656180115571
e-type_smote_maxabs_lda_2000.csv	logistic_l1_balanced_1	0.2059139784946236	0.0014723724664117	0.2040857866111337	0.2077421703781135	0.2236235163314814	0.0024192346833318	0.2206196397219823	0.2266273929409804	0.065304151870669
e-type_smote_maxabs_lda_2000.csv	logistic_l2_3	0.2059139784946236	0.0014723724664117	0.2040857866111337	0.2077421703781135	0.2240823166391995	0.0026978532499268	0.2207324893863284	0.2274321438920707	0.0653588908160418
e-type_smote_maxabs_lda_2000.csv	logistic_l1_1	0.2059139784946236	0.0014723724664117	0.2040857866111337	0.2077421703781135	0.2236235163314814	0.0024192346833318	0.2206196397219823	0.2266273929409804	0.0653041591737845
e-type_smote_maxabs_lda_2000.csv	logistic_l1_3	0.2059139784946236	0.0014723724664117	0.2040857866111337	0.2077421703781135	0.222946076909146	0.0046784210032534	0.2171370499809659	0.2287551038373262	0.0653656180115571
e-type_smote_maxabs_lda_2000.csv	logistic_l1_balanced_1	0.2059139784946236	0.0014723724664117	0.2040857866111337	0.2077421703781135	0.2236235163314814	0.0024192346833318	0.2206196397219823	0.2266273929409804	0.065304151870669
e-type_smote_maxabs_lda_2000.csv	logistic_l2_1	0.2053763440860215	0.0014723724664117	0.2035481522025315	0.2072045359695114	0.2228343177012987	0.0027380928108188	0.2194345264343644	0.226234108968233	0.0652397534154999
e-type_smote_maxabs_lda_2000.csv	logistic_l1_2	0.2053763440860215	0.0024043741693546	0.2023909192417227	0.2083617689303202	0.2224511084407393	0.0028580254968127	0.2189024010753985	0.2259998158060802	0.0647821117245695
e-type_smote_maxabs_lda_2000.csv	logistic_l2_balanced_1	0.2053763440860215	0.0014723724664117	0.2035481522025315	0.2072045359695114	0.2228343177012987	0.0027380928108188	0.2194345264343644	0.226234108968233	0.0652397629918005
e-type_smote_maxabs_lda_2000.csv	logistic_l2_1	0.2053763440860215	0.0014723724664117	0.2035481522025315	0.2072045359695114	0.2228343177012987	0.0027380928108188	0.2194345264343644	0.226234108968233	0.0652397534154999
e-type_smote_maxabs_lda_2000.csv	logistic_l1_2	0.2053763440860215	0.0024043741693546	0.2023909192417227	0.2083617689303202	0.2224511084407393	0.0028580254968127	0.2189024010753985	0.2259998158060802	0.0647821117245695
e-type_smote_maxabs_lda_2000.csv	logistic_l2_balanced_1	0.2053763440860215	0.0014723724664117	0.2035481522025315	0.2072045359695114	0.2228343177012987	0.0027380928108188	0.2194345264343644	0.226234108968233	0.0652397629918005
e-type_smote_maxabs_lda_2000.csv	logistic_l2_1	0.2053763440860215	0.0014723724664117354	0.20354815220253158	0.20720453596951144	0.22283431770129875	0.0027380928108188497	0.21943452643436442	0.22623410896823307	0.06523975341549997
e-type_smote_maxabs_lda_2000.csv	logistic_l1_2	0.2053763440860215	0.0024043741693546214	0.20239091924172278	0.20836176893032024	0.22245110844073937	0.0028580254968127456	0.21890240107539854	0.2259998158060802	0.06478211172456957
e-type_smote_maxabs_lda_2000.csv	logistic_l2_balanced_1	0.2053763440860215	0.0014723724664117354	0.20354815220253158	0.20720453596951144	0.22283431770129875	0.0027380928108188497	0.21943452643436442	0.22623410896823307	0.0652397629918005
e-type_smote_maxabs_lda_2000.csv	logistic_l2_2	0.20053763440860214	0.0024043741693546106	0.19755220956430344	0.20352305925290085	0.2157936631758745	0.007756728316884924	0.2061624128809508	0.2254249134707982	0.06426871243851431
e-type_smote_maxabs_lda_2000.csv	logistic_l2_2	0.2005376344086021	0.0024043741693546	0.1975522095643034	0.2035230592529008	0.2157936631758745	0.0077567283168849	0.2061624128809508	0.2254249134707982	0.0642687124385143
e-type_smote_maxabs_lda_2000.csv	logistic_l2_2	0.2005376344086021	0.0024043741693546	0.1975522095643034	0.2035230592529008	0.2157936631758745	0.0077567283168849	0.2061624128809508	0.2254249134707982	0.0642687124385143
e-type_smote_maxabs_lda_2000.csv	lda	0.19946236559139785	0.0012021870846773053	0.1979696531692485	0.2009550780135472	0.21798393705958125	0.0008566532549208696	0.21692026155400193	0.21904761256516056	0.059513138596939144
e-type_smote_maxabs_lda_2000.csv	lda	0.1994623655913978	0.0012021870846773	0.1979696531692485	0.2009550780135472	0.2179839370595812	0.0008566532549208	0.2169202615540019	0.2190476125651605	0.0595131385969391
e-type_smote_maxabs_lda_2000.csv	lda	0.1994623655913978	0.0012021870846773	0.1979696531692485	0.2009550780135472	0.2179839370595812	0.0008566532549208	0.2169202615540019	0.2190476125651605	0.0595131385969391
e-type_smote_maxabs_lda_2000.csv	mlp_100_lr0.001	0.19516129032258064	0.010165414194187655	0.18253926149082828	0.207783319154333	0.27693900922451126	0.03547901095401895	0.23288599863102885	0.32099201981799363	0.06362771125438588
e-type_smote_maxabs_lda_2000.csv	mlp_100_lr0.001	0.1951612903225806	0.0101654141941876	0.1825392614908282	0.207783319154333	0.2769390092245112	0.0354790109540189	0.2328859986310288	0.3209920198179936	0.0636277112543858
e-type_smote_maxabs_lda_2000.csv	mlp_100_lr0.001	0.1951612903225806	0.0101654141941876	0.1825392614908282	0.207783319154333	0.2769390092245112	0.0354790109540189	0.2328859986310288	0.3209920198179936	0.0636277112543858
e-type_smote_maxabs_lda_2000.csv	mlp_50_lr0.001	0.1946236559139785	0.0124064309238863	0.1792190372895869	0.2100282745383701	0.2549202835531411	0.0310666135821313	0.2163459879221005	0.2934945791841817	0.0659571553485637
e-type_smote_maxabs_lda_2000.csv	mlp_50_lr0.001	0.1946236559139785	0.0124064309238863	0.1792190372895869	0.2100282745383701	0.2549202835531411	0.0310666135821313	0.2163459879221005	0.2934945791841817	0.0659571553485637
e-type_smote_maxabs_lda_2000.csv	mlp_50_lr0.001	0.1946236559139785	0.01240643092388637	0.1792190372895869	0.2100282745383701	0.2549202835531411	0.03106661358213132	0.2163459879221005	0.2934945791841817	0.06595715534856374
e-type_smote_maxabs_lda_2000.csv	mlp_128_64_es	0.1817204301075269	0.0189701922197605	0.1581658253892449	0.2052750348258088	0.2687086722013861	0.0600158048427355	0.1941892080049381	0.3432281363978342	0.0653672047959791
e-type_smote_maxabs_lda_2000.csv	mlp_128_64_es	0.1817204301075269	0.0189701922197605	0.1581658253892449	0.2052750348258088	0.2687086722013861	0.0600158048427355	0.1941892080049381	0.3432281363978342	0.0653672047959791
e-type_smote_maxabs_lda_2000.csv	mlp_128_64_es	0.1817204301075269	0.018970192219760585	0.15816582538924498	0.2052750348258088	0.26870867220138617	0.06001580484273559	0.19418920800493814	0.3432281363978342	0.06536720479597916
e-type_smote_maxabs_lda_2000.csv	svm_rbf_3	0.1752688172043011	0.0035049475296788	0.1709168500411056	0.1796207843674965	0.180568387586052	0.0031223267391701	0.1766915068833955	0.1844452682887085	0.0661944282137448
e-type_smote_maxabs_lda_2000.csv	svm_rbf_3	0.1752688172043011	0.0035049475296788	0.1709168500411056	0.1796207843674965	0.180568387586052	0.0031223267391701	0.1766915068833955	0.1844452682887085	0.0661944282137448
e-type_smote_maxabs_lda_2000.csv	svm_rbf_3	0.1752688172043011	0.003504947529678852	0.17091685004110563	0.17962078436749657	0.18056838758605206	0.003122326739170135	0.17669150688339555	0.18444526828870858	0.06619442821374485
e-type_smote_maxabs_lda_2000.csv	svm_poly_4	0.17258064516129035	0.0012021870846773053	0.171087932739141	0.1740733575834397	0.46321339996318134	0.0029248604530891765	0.45958170603881054	0.46684509388755213	0.07076046744723734
e-type_smote_maxabs_lda_2000.csv	svm_poly_4	0.1725806451612903	0.0012021870846773	0.171087932739141	0.1740733575834397	0.4632133999631813	0.0029248604530891	0.4595817060388105	0.4668450938875521	0.0707604674472373
e-type_smote_maxabs_lda_2000.csv	svm_poly_4	0.1725806451612903	0.0012021870846773	0.171087932739141	0.1740733575834397	0.4632133999631813	0.0029248604530891	0.4595817060388105	0.4668450938875521	0.0707604674472373
e-type_smote_maxabs_lda_2000.csv	svm_sigmoid	0.16451612903225807	0.010651404707612338	0.15129066327651772	0.17774159478799842	0.2923704802413094	0.031470628282186774	0.25329453410246483	0.331446426380154	0.05652719025568487
e-type_smote_maxabs_lda_2000.csv	svm_sigmoid_bal	0.16451612903225807	0.010651404707612338	0.15129066327651772	0.17774159478799842	0.2923704802413094	0.031470628282186774	0.25329453410246483	0.331446426380154	0.05652509770416238
e-type_smote_maxabs_lda_2000.csv	svm_sigmoid	0.164516129032258	0.0106514047076123	0.1512906632765177	0.1777415947879984	0.2923704802413094	0.0314706282821867	0.2532945341024648	0.331446426380154	0.0565271902556848
e-type_smote_maxabs_lda_2000.csv	svm_sigmoid_bal	0.164516129032258	0.0106514047076123	0.1512906632765177	0.1777415947879984	0.2923704802413094	0.0314706282821867	0.2532945341024648	0.331446426380154	0.0565250977041623
e-type_smote_maxabs_lda_2000.csv	svm_sigmoid	0.164516129032258	0.0106514047076123	0.1512906632765177	0.1777415947879984	0.2923704802413094	0.0314706282821867	0.2532945341024648	0.331446426380154	0.0565271902556848
e-type_smote_maxabs_lda_2000.csv	svm_sigmoid_bal	0.164516129032258	0.0106514047076123	0.1512906632765177	0.1777415947879984	0.2923704802413094	0.0314706282821867	0.2532945341024648	0.331446426380154	0.0565250977041623
e-type_smote_maxabs_lda_2000.csv	gaussian_nb	0.15806451612903225	0.0022490860928335342	0.15527190689870007	0.16085712535936442	0.17257883631421522	0.005678245162578574	0.16552836372286672	0.17962930890556372	0.0633081906547561
e-type_smote_maxabs_lda_2000.csv	gaussian_nb	0.1580645161290322	0.0022490860928335	0.1552719068987	0.1608571253593644	0.1725788363142152	0.0056782451625785	0.1655283637228667	0.1796293089055637	0.0633081906547561
e-type_smote_maxabs_lda_2000.csv	gaussian_nb	0.1580645161290322	0.0022490860928335	0.1552719068987	0.1608571253593644	0.1725788363142152	0.0056782451625785	0.1655283637228667	0.1796293089055637	0.0633081906547561
e-type_smote_maxabs_lda_2000.csv	svm_rbf_2	0.1478494623655914	0.0063043222578271	0.1400216123849727	0.1556773123462101	0.2198417470919074	0.0118341045941141	0.2051477654664181	0.2345357287173968	0.0639875908105309
e-type_smote_maxabs_lda_2000.csv	svm_rbf_2	0.1478494623655914	0.0063043222578271	0.1400216123849727	0.1556773123462101	0.2198417470919074	0.0118341045941141	0.2051477654664181	0.2345357287173968	0.0639875908105309
e-type_smote_maxabs_lda_2000.csv	svm_rbf_2	0.1478494623655914	0.006304322257827184	0.1400216123849727	0.1556773123462101	0.21984174709190749	0.011834104594114155	0.20514776546641814	0.23453572871739684	0.06398759081053099
e-type_smote_maxabs_lda_2000.csv	svm_rbf_auto	0.14408602150537633	0.005240212013338157	0.13757943890545946	0.1505926041052932	0.2285211246746702	0.01645087983423112	0.20809465944572908	0.24894758990361132	0.06376776440666401
e-type_smote_maxabs_lda_2000.csv	svm_rbf_auto	0.1440860215053763	0.0052402120133381	0.1375794389054594	0.1505926041052932	0.2285211246746702	0.0164508798342311	0.208094659445729	0.2489475899036113	0.063767764406664
e-type_smote_maxabs_lda_2000.csv	svm_rbf_auto	0.1440860215053763	0.0052402120133381	0.1375794389054594	0.1505926041052932	0.2285211246746702	0.0164508798342311	0.208094659445729	0.2489475899036113	0.063767764406664
e-type_smote_maxabs_lda_2000.csv	svm_rbf_1	0.14301075268817204	0.006129975403758815	0.1353993829194501	0.15062212245689396	0.1545487838259519	0.008963453586362548	0.1434191862081951	0.16567838144370872	0.06418955389581793
e-type_smote_maxabs_lda_2000.csv	svm_rbf_bal	0.14301075268817204	0.006129975403758815	0.1353993829194501	0.15062212245689396	0.1545487838259519	0.008963453586362548	0.1434191862081951	0.16567838144370872	0.06417590954861142
e-type_smote_maxabs_lda_2000.csv	svm_rbf_1	0.143010752688172	0.0061299754037588	0.1353993829194501	0.1506221224568939	0.1545487838259519	0.0089634535863625	0.1434191862081951	0.1656783814437087	0.0641895538958179
e-type_smote_maxabs_lda_2000.csv	svm_rbf_bal	0.143010752688172	0.0061299754037588	0.1353993829194501	0.1506221224568939	0.1545487838259519	0.0089634535863625	0.1434191862081951	0.1656783814437087	0.0641759095486114
e-type_smote_maxabs_lda_2000.csv	svm_rbf_1	0.143010752688172	0.0061299754037588	0.1353993829194501	0.1506221224568939	0.1545487838259519	0.0089634535863625	0.1434191862081951	0.1656783814437087	0.0641895538958179
e-type_smote_maxabs_lda_2000.csv	svm_rbf_bal	0.143010752688172	0.0061299754037588	0.1353993829194501	0.1506221224568939	0.1545487838259519	0.0089634535863625	0.1434191862081951	0.1656783814437087	0.0641759095486114
e-type_smote_maxabs_lda_10000.csv	extra_tree_bal	0.2956989247311828	0.0187209519854625	0.2724537926387327	0.3189440568236329	0.4397829564750091	0.0132231885869677	0.4233641992651124	0.4562017136849058	0.0611976533839342
e-type_smote_maxabs_lda_10000.csv	extra_tree_bal	0.2956989247311828	0.0187209519854625	0.2724537926387327	0.3189440568236329	0.4397829564750091	0.0132231885869677	0.4233641992651124	0.4562017136849058	0.0611976533839342
e-type_smote_maxabs_lda_10000.csv	extra_tree_bal	0.2956989247311828	0.01872095198546252	0.2724537926387327	0.3189440568236329	0.4397829564750091	0.013223188586967713	0.4233641992651124	0.4562017136849058	0.061197653383934215
e-type_smote_maxabs_lda_10000.csv	extra_tree	0.29086021505376347	0.016285087345011794	0.27063960838985857	0.3110808217176684	0.43648311924319216	0.01572838093320265	0.41695375488839986	0.45601248359798446	0.061458184693232144
e-type_smote_maxabs_lda_10000.csv	extra_tree	0.2908602150537634	0.0162850873450117	0.2706396083898585	0.3110808217176684	0.4364831192431921	0.0157283809332026	0.4169537548883998	0.4560124835979844	0.0614581846932321
e-type_smote_maxabs_lda_10000.csv	extra_tree	0.2908602150537634	0.0162850873450117	0.2706396083898585	0.3110808217176684	0.4364831192431921	0.0157283809332026	0.4169537548883998	0.4560124835979844	0.0614581846932321
e-type_smote_maxabs_lda_10000.csv	rf_bal_200_20	0.2489247311827957	0.0061886367920544	0.2412405236801424	0.256608938685449	0.414834037263624	0.0105992781427895	0.4016732951867742	0.4279947793404738	0.0685606119938092
e-type_smote_maxabs_lda_10000.csv	rf_bal_200_20	0.2489247311827957	0.0061886367920544	0.2412405236801424	0.256608938685449	0.414834037263624	0.0105992781427895	0.4016732951867742	0.4279947793404738	0.0685606119938092
e-type_smote_maxabs_lda_10000.csv	rf_bal_200_20	0.2489247311827957	0.0061886367920544775	0.2412405236801424	0.256608938685449	0.414834037263624	0.01059927814278952	0.4016732951867742	0.4279947793404738	0.06856061199380925
e-type_smote_maxabs_lda_10000.csv	rf_200_20	0.24623655913978496	0.004883307022737885	0.2401731326174757	0.2522999856620942	0.41259617172156443	0.0032104986901242446	0.4086098110817568	0.41658253236137205	0.06838426684247931
e-type_smote_maxabs_lda_10000.csv	rf_200_20	0.2462365591397849	0.0048833070227378	0.2401731326174757	0.2522999856620942	0.4125961717215644	0.0032104986901242	0.4086098110817568	0.416582532361372	0.0683842668424793
e-type_smote_maxabs_lda_10000.csv	rf_200_20	0.2462365591397849	0.0048833070227378	0.2401731326174757	0.2522999856620942	0.4125961717215644	0.0032104986901242	0.4086098110817568	0.416582532361372	0.0683842668424793
e-type_smote_maxabs_lda_10000.csv	decision_tree_bal	0.2456989247311828	0.0291762657015379	0.2094718060075557	0.2819260434548098	0.3894901918689015	0.0252335784532046	0.358158565957707	0.420821817780096	0.088741302972802
e-type_smote_maxabs_lda_10000.csv	decision_tree_bal	0.2456989247311828	0.0291762657015379	0.2094718060075557	0.2819260434548098	0.3894901918689015	0.0252335784532046	0.358158565957707	0.420821817780096	0.088741302972802
e-type_smote_maxabs_lda_10000.csv	decision_tree_bal	0.2456989247311828	0.02917626570153794	0.20947180600755577	0.2819260434548098	0.3894901918689015	0.02523357845320464	0.358158565957707	0.420821817780096	0.08874130297280201
e-type_smote_maxabs_lda_10000.csv	rf_100_20	0.24516129032258066	0.006129975403758801	0.23754992055385876	0.25277266009130256	0.4123861568590453	0.004943931651403087	0.40624745491791797	0.4185248588001726	0.06890091912475735
e-type_smote_maxabs_lda_10000.csv	rf_100_20	0.2451612903225806	0.0061299754037588	0.2375499205538587	0.2527726600913025	0.4123861568590453	0.004943931651403	0.4062474549179179	0.4185248588001726	0.0689009191247573
e-type_smote_maxabs_lda_10000.csv	rf_100_20	0.2451612903225806	0.0061299754037588	0.2375499205538587	0.2527726600913025	0.4123861568590453	0.004943931651403	0.4062474549179179	0.4185248588001726	0.0689009191247573
e-type_smote_maxabs_lda_10000.csv	decision_tree	0.2446236559139785	0.0291390905761811	0.2084426962051356	0.2808046156228213	0.3889581921260771	0.0264155378290966	0.3561589698104981	0.421757414441656	0.0888678051865907
e-type_smote_maxabs_lda_10000.csv	mlp_50x2_lr0.001	0.2446236559139785	0.0285756607869211	0.2091422866899754	0.2801050251379815	0.3539618214247964	0.0530513762954232	0.2880898374236086	0.4198338054259841	0.069023487649252
e-type_smote_maxabs_lda_10000.csv	decision_tree	0.2446236559139785	0.0291390905761811	0.2084426962051356	0.2808046156228213	0.3889581921260771	0.0264155378290966	0.3561589698104981	0.421757414441656	0.0888678051865907
e-type_smote_maxabs_lda_10000.csv	mlp_50x2_lr0.001	0.2446236559139785	0.0285756607869211	0.2091422866899754	0.2801050251379815	0.3539618214247964	0.0530513762954232	0.2880898374236086	0.4198338054259841	0.069023487649252
e-type_smote_maxabs_lda_10000.csv	decision_tree	0.2446236559139785	0.029139090576181192	0.20844269620513567	0.28080461562282133	0.3889581921260771	0.02641553782909663	0.3561589698104981	0.42175741444165604	0.08886780518659075
e-type_smote_maxabs_lda_10000.csv	mlp_50x2_lr0.001	0.2446236559139785	0.0285756607869211	0.20914228668997545	0.2801050251379815	0.3539618214247964	0.05305137629542321	0.28808983742360866	0.4198338054259841	0.06902348764925205
e-type_smote_maxabs_lda_10000.csv	mlp_128_64	0.2424731182795699	0.052690915004308	0.1770487060863059	0.3078975304728338	0.3509030820084952	0.0619615984176244	0.2739675959821714	0.4278385680348189	0.0725244286175777
e-type_smote_maxabs_lda_10000.csv	mlp_128_64	0.2424731182795699	0.052690915004308	0.1770487060863059	0.3078975304728338	0.3509030820084952	0.0619615984176244	0.2739675959821714	0.4278385680348189	0.0725244286175777
e-type_smote_maxabs_lda_10000.csv	mlp_128_64	0.2424731182795699	0.05269091500430803	0.17704870608630596	0.30789753047283386	0.3509030820084952	0.061961598417624476	0.2739675959821714	0.42783856803481896	0.07252442861757778
e-type_smote_maxabs_lda_10000.csv	svm_poly_3	0.2370967741935484	0.0012021870846773	0.235604061771399	0.2385894866156977	0.2842855680777426	0.0214542746922319	0.257646567584824	0.3109245685706612	0.0689145810715347
e-type_smote_maxabs_lda_10000.csv	svm_poly_3	0.2370967741935484	0.0012021870846773	0.235604061771399	0.2385894866156977	0.2842855680777426	0.0214542746922319	0.257646567584824	0.3109245685706612	0.0689145810715347
e-type_smote_maxabs_lda_10000.csv	svm_poly_3	0.2370967741935484	0.0012021870846773053	0.23560406177139906	0.23858948661569776	0.28428556807774263	0.021454274692231975	0.257646567584824	0.31092456857066125	0.06891458107153477
e-type_smote_maxabs_lda_10000.csv	rf_200_10	0.2306451612903226	0.0051708021671159	0.2242247623975806	0.2370655601830645	0.3592503490333171	0.0127557535910181	0.3434119890293915	0.3750887090372428	0.0611988807779715
e-type_smote_maxabs_lda_10000.csv	rf_200_10	0.2306451612903226	0.0051708021671159	0.2242247623975806	0.2370655601830645	0.3592503490333171	0.0127557535910181	0.3434119890293915	0.3750887090372428	0.0611988807779715
e-type_smote_maxabs_lda_10000.csv	rf_200_10	0.2306451612903226	0.005170802167115956	0.22422476239758068	0.2370655601830645	0.35925034903331715	0.012755753591018156	0.3434119890293915	0.3750887090372428	0.06119888077797159
e-type_smote_maxabs_lda_10000.csv	rf_100_10	0.2295698924731183	0.0081978229472994	0.2193909508558079	0.2397488340904286	0.3575899030261544	0.0146548067010182	0.3393935571448647	0.3757862489074441	0.0613989587630512
e-type_smote_maxabs_lda_10000.csv	rf_100_10	0.2295698924731183	0.0081978229472994	0.2193909508558079	0.2397488340904286	0.3575899030261544	0.0146548067010182	0.3393935571448647	0.3757862489074441	0.0613989587630512
e-type_smote_maxabs_lda_10000.csv	rf_100_10	0.2295698924731183	0.008197822947299415	0.21939095085580793	0.23974883409042866	0.3575899030261544	0.014654806701018297	0.3393935571448647	0.3757862489074441	0.06139895876305128
e-type_smote_maxabs_lda_10000.csv	rf_bal_100_10	0.2290322580645161	0.0044171173992352	0.2235476824140463	0.2345168337149859	0.3504108641153506	0.0059803510596526	0.3429852775079602	0.357836450722741	0.0613445195980755
e-type_smote_maxabs_lda_10000.csv	rf_bal_100_10	0.2290322580645161	0.0044171173992352	0.2235476824140463	0.2345168337149859	0.3504108641153506	0.0059803510596526	0.3429852775079602	0.357836450722741	0.0613445195980755
e-type_smote_maxabs_lda_10000.csv	rf_bal_100_10	0.2290322580645161	0.004417117399235207	0.2235476824140463	0.2345168337149859	0.35041086411535066	0.00598035105965261	0.34298527750796026	0.35783645072274106	0.06134451959807552
e-type_smote_maxabs_lda_10000.csv	mlp_128_64_es	0.2204301075268817	0.0430946761878532	0.1669209995901752	0.2739392154635882	0.3123718105000169	0.1039719872139424	0.1832735371547623	0.4414700838452715	0.0702481417804339
e-type_smote_maxabs_lda_10000.csv	mlp_128_64_es	0.2204301075268817	0.0430946761878532	0.1669209995901752	0.2739392154635882	0.3123718105000169	0.1039719872139424	0.1832735371547623	0.4414700838452715	0.0702481417804339
e-type_smote_maxabs_lda_10000.csv	mlp_128_64_es	0.2204301075268817	0.04309467618785322	0.1669209995901752	0.2739392154635882	0.31237181050001694	0.1039719872139424	0.18327353715476236	0.44147008384527153	0.07024814178043395
e-type_smote_maxabs_lda_10000.csv	mlp_128_64_alpha	0.21236559139784944	0.05188241684306124	0.1479450622640196	0.2767861205316793	0.36642216291232377	0.03639709067949459	0.3212292057762375	0.41161512004841005	0.07425132377205704
e-type_smote_maxabs_lda_10000.csv	mlp_128_64_alpha	0.2123655913978494	0.0518824168430612	0.1479450622640196	0.2767861205316793	0.3664221629123237	0.0363970906794945	0.3212292057762375	0.41161512004841	0.074251323772057
e-type_smote_maxabs_lda_10000.csv	mlp_128_64_alpha	0.2123655913978494	0.0518824168430612	0.1479450622640196	0.2767861205316793	0.3664221629123237	0.0363970906794945	0.3212292057762375	0.41161512004841	0.074251323772057
e-type_smote_maxabs_lda_10000.csv	logistic_l2_1	0.20161290322580644	0.0	0.20161290322580644	0.20161290322580644	0.21669454886750628	0.0005608766091374029	0.21599812857450576	0.2173909691605068	0.06574759256229763
e-type_smote_maxabs_lda_10000.csv	logistic_l2_2	0.20161290322580644	0.0	0.20161290322580644	0.20161290322580644	0.21699535119261354	0.0005560149035348948	0.2163049675044295	0.21768573488079757	0.06551431328268369
e-type_smote_maxabs_lda_10000.csv	logistic_l2_3	0.20161290322580644	0.0	0.20161290322580644	0.20161290322580644	0.21348868215357503	0.0027457261986079135	0.2100794127838387	0.21689795152331134	0.0657723537482258
e-type_smote_maxabs_lda_10000.csv	logistic_l1_1	0.20161290322580644	0.0	0.20161290322580644	0.20161290322580644	0.21348868215357503	0.0027457261986079135	0.2100794127838387	0.21689795152331134	0.06576206002024053
e-type_smote_maxabs_lda_10000.csv	logistic_l1_2	0.20161290322580644	0.0	0.20161290322580644	0.20161290322580644	0.2169440316638417	0.0006245642507439238	0.21616853271912786	0.21771953060855556	0.06565620144953657
e-type_smote_maxabs_lda_10000.csv	logistic_l1_3	0.20161290322580644	0.0	0.20161290322580644	0.20161290322580644	0.21348868215357503	0.0027457261986079135	0.2100794127838387	0.21689795152331134	0.06577375017737613
e-type_smote_maxabs_lda_10000.csv	logistic_l2_balanced_1	0.20161290322580644	0.0	0.20161290322580644	0.20161290322580644	0.21669454886750628	0.0005608766091374029	0.21599812857450576	0.2173909691605068	0.06574759515612684
e-type_smote_maxabs_lda_10000.csv	logistic_l1_balanced_1	0.20161290322580644	0.0	0.20161290322580644	0.20161290322580644	0.21348868215357503	0.0027457261986079135	0.2100794127838387	0.21689795152331134	0.06576205287655079
e-type_smote_maxabs_lda_10000.csv	logistic_l2_1	0.2016129032258064	0.0	0.2016129032258064	0.2016129032258064	0.2166945488675062	0.0005608766091374	0.2159981285745057	0.2173909691605068	0.0657475925622976
e-type_smote_maxabs_lda_10000.csv	logistic_l2_2	0.2016129032258064	0.0	0.2016129032258064	0.2016129032258064	0.2169953511926135	0.0005560149035348	0.2163049675044295	0.2176857348807975	0.0655143132826836
e-type_smote_maxabs_lda_10000.csv	logistic_l2_3	0.2016129032258064	0.0	0.2016129032258064	0.2016129032258064	0.213488682153575	0.0027457261986079	0.2100794127838387	0.2168979515233113	0.0657723537482258
e-type_smote_maxabs_lda_10000.csv	logistic_l1_1	0.2016129032258064	0.0	0.2016129032258064	0.2016129032258064	0.213488682153575	0.0027457261986079	0.2100794127838387	0.2168979515233113	0.0657620600202405
e-type_smote_maxabs_lda_10000.csv	logistic_l1_2	0.2016129032258064	0.0	0.2016129032258064	0.2016129032258064	0.2169440316638417	0.0006245642507439	0.2161685327191278	0.2177195306085555	0.0656562014495365
e-type_smote_maxabs_lda_10000.csv	logistic_l1_3	0.2016129032258064	0.0	0.2016129032258064	0.2016129032258064	0.213488682153575	0.0027457261986079	0.2100794127838387	0.2168979515233113	0.0657737501773761
e-type_smote_maxabs_lda_10000.csv	logistic_l2_balanced_1	0.2016129032258064	0.0	0.2016129032258064	0.2016129032258064	0.2166945488675062	0.0005608766091374	0.2159981285745057	0.2173909691605068	0.0657475951561268
e-type_smote_maxabs_lda_10000.csv	logistic_l1_balanced_1	0.2016129032258064	0.0	0.2016129032258064	0.2016129032258064	0.213488682153575	0.0027457261986079	0.2100794127838387	0.2168979515233113	0.0657620528765507
e-type_smote_maxabs_lda_10000.csv	logistic_l2_1	0.2016129032258064	0.0	0.2016129032258064	0.2016129032258064	0.2166945488675062	0.0005608766091374	0.2159981285745057	0.2173909691605068	0.0657475925622976
e-type_smote_maxabs_lda_10000.csv	logistic_l2_2	0.2016129032258064	0.0	0.2016129032258064	0.2016129032258064	0.2169953511926135	0.0005560149035348	0.2163049675044295	0.2176857348807975	0.0655143132826836
e-type_smote_maxabs_lda_10000.csv	logistic_l2_3	0.2016129032258064	0.0	0.2016129032258064	0.2016129032258064	0.213488682153575	0.0027457261986079	0.2100794127838387	0.2168979515233113	0.0657723537482258
e-type_smote_maxabs_lda_10000.csv	logistic_l1_1	0.2016129032258064	0.0	0.2016129032258064	0.2016129032258064	0.213488682153575	0.0027457261986079	0.2100794127838387	0.2168979515233113	0.0657620600202405
e-type_smote_maxabs_lda_10000.csv	logistic_l1_2	0.2016129032258064	0.0	0.2016129032258064	0.2016129032258064	0.2169440316638417	0.0006245642507439	0.2161685327191278	0.2177195306085555	0.0656562014495365
e-type_smote_maxabs_lda_10000.csv	logistic_l1_3	0.2016129032258064	0.0	0.2016129032258064	0.2016129032258064	0.213488682153575	0.0027457261986079	0.2100794127838387	0.2168979515233113	0.0657737501773761
e-type_smote_maxabs_lda_10000.csv	logistic_l2_balanced_1	0.2016129032258064	0.0	0.2016129032258064	0.2016129032258064	0.2166945488675062	0.0005608766091374	0.2159981285745057	0.2173909691605068	0.0657475951561268
e-type_smote_maxabs_lda_10000.csv	logistic_l1_balanced_1	0.2016129032258064	0.0	0.2016129032258064	0.2016129032258064	0.213488682153575	0.0027457261986079	0.2100794127838387	0.2168979515233113	0.0657620528765507
e-type_smote_maxabs_lda_10000.csv	lda	0.1989247311827957	0.0	0.1989247311827957	0.1989247311827957	0.2189594312269657	0.0026560961569358	0.2156614522531311	0.2222574102008003	0.0596267707600077
e-type_smote_maxabs_lda_10000.csv	lda	0.1989247311827957	0.0	0.1989247311827957	0.1989247311827957	0.2189594312269657	0.0026560961569358	0.2156614522531311	0.2222574102008003	0.0596267707600077
e-type_smote_maxabs_lda_10000.csv	lda	0.1989247311827957	0.0	0.1989247311827957	0.1989247311827957	0.21895943122696573	0.002656096156935845	0.2156614522531311	0.22225741020080036	0.0596267707600077
e-type_smote_maxabs_lda_10000.csv	mlp_100_lr0.001	0.19784946236559142	0.04937023912279278	0.13654821386410854	0.2591507108670743	0.3349317567625679	0.09847329963215008	0.21266100582499498	0.45720250770014087	0.06854421680689401
e-type_smote_maxabs_lda_10000.csv	mlp_100_lr0.001	0.1978494623655914	0.0493702391227927	0.1365482138641085	0.2591507108670743	0.3349317567625679	0.09847329963215	0.2126610058249949	0.4572025077001408	0.068544216806894
e-type_smote_maxabs_lda_10000.csv	mlp_100_lr0.001	0.1978494623655914	0.0493702391227927	0.1365482138641085	0.2591507108670743	0.3349317567625679	0.09847329963215	0.2126610058249949	0.4572025077001408	0.068544216806894
e-type_smote_maxabs_lda_10000.csv	mlp_50_lr0.001	0.19193548387096776	0.05266347896235191	0.12654513802325396	0.25732582971868156	0.28786802372807074	0.08206656035096174	0.18596893028386488	0.38976711717227663	0.06865875217542936
e-type_smote_maxabs_lda_10000.csv	mlp_50_lr0.001	0.1919354838709677	0.0526634789623519	0.1265451380232539	0.2573258297186815	0.2878680237280707	0.0820665603509617	0.1859689302838648	0.3897671171722766	0.0686587521754293
e-type_smote_maxabs_lda_10000.csv	mlp_50_lr0.001	0.1919354838709677	0.0526634789623519	0.1265451380232539	0.2573258297186815	0.2878680237280707	0.0820665603509617	0.1859689302838648	0.3897671171722766	0.0686587521754293
e-type_smote_maxabs_lda_10000.csv	svm_sigmoid	0.1838709677419355	0.004498172185667	0.1782857492812711	0.1894561862025998	0.2950891376963863	0.0164588567564399	0.2746527678103221	0.3155255075824505	0.0560090260742829
e-type_smote_maxabs_lda_10000.csv	svm_sigmoid_bal	0.1838709677419355	0.004498172185667	0.1782857492812711	0.1894561862025998	0.2950891376963863	0.0164588567564399	0.2746527678103221	0.3155255075824505	0.055584184766496
e-type_smote_maxabs_lda_10000.csv	svm_sigmoid	0.1838709677419355	0.004498172185667	0.1782857492812711	0.1894561862025998	0.2950891376963863	0.0164588567564399	0.2746527678103221	0.3155255075824505	0.0560090260742829
e-type_smote_maxabs_lda_10000.csv	svm_sigmoid_bal	0.1838709677419355	0.004498172185667	0.1782857492812711	0.1894561862025998	0.2950891376963863	0.0164588567564399	0.2746527678103221	0.3155255075824505	0.055584184766496
e-type_smote_maxabs_lda_10000.csv	svm_sigmoid	0.1838709677419355	0.0044981721856670685	0.17828574928127117	0.18945618620259985	0.29508913769638634	0.016458856756439908	0.2746527678103221	0.31552550758245057	0.05600902607428295
e-type_smote_maxabs_lda_10000.csv	svm_sigmoid_bal	0.1838709677419355	0.0044981721856670685	0.17828574928127117	0.18945618620259985	0.29508913769638634	0.016458856756439908	0.2746527678103221	0.31552550758245057	0.05558418476649605
e-type_smote_maxabs_lda_10000.csv	svm_poly_4	0.16774193548387095	0.0014723724664117354	0.16591374360038103	0.16957012736736088	0.49015482441973823	0.0028173867186770617	0.48665657676213947	0.493653072077337	0.07209648109461933
e-type_smote_maxabs_lda_10000.csv	svm_poly_4	0.1677419354838709	0.0014723724664117	0.165913743600381	0.1695701273673608	0.4901548244197382	0.002817386718677	0.4866565767621394	0.493653072077337	0.0720964810946193
e-type_smote_maxabs_lda_10000.csv	svm_poly_4	0.1677419354838709	0.0014723724664117	0.165913743600381	0.1695701273673608	0.4901548244197382	0.002817386718677	0.4866565767621394	0.493653072077337	0.0720964810946193
e-type_smote_maxabs_lda_10000.csv	gaussian_nb	0.1586021505376344	0.0	0.1586021505376344	0.1586021505376344	0.1788219527867813	0.0054680914645881	0.1720324204763169	0.1856114850972458	0.0634733193117463
e-type_smote_maxabs_lda_10000.csv	gaussian_nb	0.1586021505376344	0.0	0.1586021505376344	0.1586021505376344	0.1788219527867813	0.0054680914645881	0.1720324204763169	0.1856114850972458	0.0634733193117463
e-type_smote_maxabs_lda_10000.csv	gaussian_nb	0.1586021505376344	0.0	0.1586021505376344	0.1586021505376344	0.17882195278678134	0.0054680914645881895	0.1720324204763169	0.1856114850972458	0.06347331931174632
e-type_smote_maxabs_lda_10000.csv	svm_rbf_2	0.1489247311827957	0.0014723724664117	0.1470965392993057	0.1507529230662856	0.2105656139987806	0.0064355777862434	0.2025747887539622	0.2185564392435991	0.0662715815219773
e-type_smote_maxabs_lda_10000.csv	svm_rbf_2	0.1489247311827957	0.0014723724664117	0.1470965392993057	0.1507529230662856	0.2105656139987806	0.0064355777862434	0.2025747887539622	0.2185564392435991	0.0662715815219773
e-type_smote_maxabs_lda_10000.csv	svm_rbf_2	0.1489247311827957	0.0014723724664117354	0.14709653929930577	0.15075292306628563	0.21056561399878068	0.006435577786243494	0.20257478875396223	0.21855643924359913	0.06627158152197732
e-type_smote_maxabs_lda_10000.csv	svm_rbf_3	0.14086021505376342	0.0014723724664117508	0.13903202317027347	0.14268840693725338	0.1385238089325737	0.005719118189926922	0.13142258577466917	0.14562503209047825	0.06579119921585544
e-type_smote_maxabs_lda_10000.csv	svm_rbf_3	0.1408602150537634	0.0014723724664117	0.1390320231702734	0.1426884069372533	0.1385238089325737	0.0057191181899269	0.1314225857746691	0.1456250320904782	0.0657911992158554
e-type_smote_maxabs_lda_10000.csv	svm_rbf_3	0.1408602150537634	0.0014723724664117	0.1390320231702734	0.1426884069372533	0.1385238089325737	0.0057191181899269	0.1314225857746691	0.1456250320904782	0.0657911992158554
e-type_smote_maxabs_lda_10000.csv	svm_rbf_1	0.13978494623655913	0.0019008246806090068	0.13742476066374976	0.1421451318093685	0.20576411739778905	0.005973379864702307	0.19834718667219292	0.21318104812338518	0.06506619443582086
e-type_smote_maxabs_lda_10000.csv	svm_rbf_bal	0.13978494623655913	0.0019008246806090068	0.13742476066374976	0.1421451318093685	0.20576411739778905	0.005973379864702307	0.19834718667219292	0.21318104812338518	0.06506867360779783
e-type_smote_maxabs_lda_10000.csv	svm_rbf_1	0.1397849462365591	0.001900824680609	0.1374247606637497	0.1421451318093685	0.205764117397789	0.0059733798647023	0.1983471866721929	0.2131810481233851	0.0650661944358208
e-type_smote_maxabs_lda_10000.csv	svm_rbf_bal	0.1397849462365591	0.001900824680609	0.1374247606637497	0.1421451318093685	0.205764117397789	0.0059733798647023	0.1983471866721929	0.2131810481233851	0.0650686736077978
e-type_smote_maxabs_lda_10000.csv	svm_rbf_1	0.1397849462365591	0.001900824680609	0.1374247606637497	0.1421451318093685	0.205764117397789	0.0059733798647023	0.1983471866721929	0.2131810481233851	0.0650661944358208
e-type_smote_maxabs_lda_10000.csv	svm_rbf_bal	0.1397849462365591	0.001900824680609	0.1374247606637497	0.1421451318093685	0.205764117397789	0.0059733798647023	0.1983471866721929	0.2131810481233851	0.0650686736077978
e-type_smote_maxabs_lda_10000.csv	svm_rbf_auto	0.13709677419354838	0.003801649361218004	0.13237640304792964	0.14181714533916712	0.23973980762709343	0.009753920049782722	0.22762871625992034	0.25185089899426655	0.0649624688737555
e-type_smote_maxabs_lda_10000.csv	svm_rbf_auto	0.1370967741935483	0.003801649361218	0.1323764030479296	0.1418171453391671	0.2397398076270934	0.0097539200497827	0.2276287162599203	0.2518508989942665	0.0649624688737555
e-type_smote_maxabs_lda_10000.csv	svm_rbf_auto	0.1370967741935483	0.003801649361218	0.1323764030479296	0.1418171453391671	0.2397398076270934	0.0097539200497827	0.2276287162599203	0.2518508989942665	0.0649624688737555
e-type_smote_maxabs_lda_1000.csv	extra_tree_bal	0.2913978494623656	0.0313261443698004	0.2525013037958507	0.3302943951288804	0.4341571476248111	0.0154330729997518	0.4149944564993686	0.4533198387502536	0.0593968500948766
e-type_smote_maxabs_lda_1000.csv	extra_tree_bal	0.2913978494623656	0.0313261443698004	0.2525013037958507	0.3302943951288804	0.4341571476248111	0.0154330729997518	0.4149944564993686	0.4533198387502536	0.0593968500948766
e-type_smote_maxabs_lda_1000.csv	extra_tree_bal	0.2913978494623656	0.03132614436980046	0.25250130379585073	0.3302943951288804	0.4341571476248111	0.015433072999751865	0.4149944564993686	0.4533198387502536	0.05939685009487665
e-type_smote_maxabs_lda_1000.csv	extra_tree	0.2817204301075269	0.0219543193431133	0.2544605421741144	0.3089803180409393	0.4334183835864466	0.0171456374160937	0.4121292628806275	0.4547075042922656	0.0594734851359898
e-type_smote_maxabs_lda_1000.csv	extra_tree	0.2817204301075269	0.0219543193431133	0.2544605421741144	0.3089803180409393	0.4334183835864466	0.0171456374160937	0.4121292628806275	0.4547075042922656	0.0594734851359898
e-type_smote_maxabs_lda_1000.csv	extra_tree	0.2817204301075269	0.02195431934311336	0.25446054217411446	0.30898031804093934	0.4334183835864466	0.01714563741609374	0.4121292628806275	0.45470750429226564	0.05947348513598989
e-type_smote_maxabs_lda_1000.csv	svm_poly_3	0.2413978494623656	0.0022490860928335	0.2386052402320334	0.2441904586926977	0.3647653044002417	0.0202383574495321	0.3396360645723787	0.3898945442281047	0.0645091051187183
e-type_smote_maxabs_lda_1000.csv	svm_poly_3	0.2413978494623656	0.0022490860928335	0.2386052402320334	0.2441904586926977	0.3647653044002417	0.0202383574495321	0.3396360645723787	0.3898945442281047	0.0645091051187183
e-type_smote_maxabs_lda_1000.csv	svm_poly_3	0.2413978494623656	0.0022490860928335342	0.23860524023203342	0.24419045869269776	0.36476530440024174	0.02023835744953213	0.3396360645723787	0.38989454422810477	0.06450910511871835
e-type_smote_maxabs_lda_1000.csv	decision_tree_bal	0.23118279569892475	0.012464540988569497	0.2157060238992828	0.24665956749856668	0.3829673774044375	0.019430243562386873	0.3588415434966912	0.4070932113121838	0.09044908285895004
e-type_smote_maxabs_lda_1000.csv	decision_tree_bal	0.2311827956989247	0.0124645409885694	0.2157060238992828	0.2466595674985666	0.3829673774044375	0.0194302435623868	0.3588415434966912	0.4070932113121838	0.09044908285895
e-type_smote_maxabs_lda_1000.csv	decision_tree_bal	0.2311827956989247	0.0124645409885694	0.2157060238992828	0.2466595674985666	0.3829673774044375	0.0194302435623868	0.3588415434966912	0.4070932113121838	0.09044908285895
e-type_smote_maxabs_lda_1000.csv	rf_200_20	0.23064516129032256	0.0035049475296788403	0.22629319412712712	0.234997128453518	0.4038100697231215	0.01268927839986641	0.3880542495708227	0.4195658898754203	0.06370892623927138
e-type_smote_maxabs_lda_1000.csv	rf_200_20	0.2306451612903225	0.0035049475296788	0.2262931941271271	0.234997128453518	0.4038100697231215	0.0126892783998664	0.3880542495708227	0.4195658898754203	0.0637089262392713
e-type_smote_maxabs_lda_1000.csv	rf_200_20	0.2306451612903225	0.0035049475296788	0.2262931941271271	0.234997128453518	0.4038100697231215	0.0126892783998664	0.3880542495708227	0.4195658898754203	0.0637089262392713
e-type_smote_maxabs_lda_1000.csv	decision_tree	0.22903225806451616	0.017770423527998284	0.20696736293696752	0.25109715319206477	0.39558920524938207	0.0204715014022584	0.3701704789690199	0.42100793152974425	0.09070208728652751
e-type_smote_maxabs_lda_1000.csv	decision_tree	0.2290322580645161	0.0177704235279982	0.2069673629369675	0.2510971531920647	0.395589205249382	0.0204715014022584	0.3701704789690199	0.4210079315297442	0.0907020872865275
e-type_smote_maxabs_lda_1000.csv	decision_tree	0.2290322580645161	0.0177704235279982	0.2069673629369675	0.2510971531920647	0.395589205249382	0.0204715014022584	0.3701704789690199	0.4210079315297442	0.0907020872865275
e-type_smote_maxabs_lda_1000.csv	rf_100_20	0.2258064516129032	0.0063043222578271	0.2179786016322845	0.2336343015935219	0.3953567260455886	0.0192837376331716	0.3714128032756723	0.4193006488155049	0.063915130448284
e-type_smote_maxabs_lda_1000.csv	rf_100_20	0.2258064516129032	0.0063043222578271	0.2179786016322845	0.2336343015935219	0.3953567260455886	0.0192837376331716	0.3714128032756723	0.4193006488155049	0.063915130448284
e-type_smote_maxabs_lda_1000.csv	rf_100_20	0.2258064516129032	0.006304322257827185	0.2179786016322845	0.2336343015935219	0.39535672604558864	0.019283737633171632	0.37141280327567233	0.41930064881550494	0.06391513044828404
e-type_smote_maxabs_lda_1000.csv	rf_bal_200_20	0.22526881720430106	0.0035049475296788403	0.22091685004110562	0.2296207843674965	0.39568006972528563	0.01803573649945089	0.37328574503282785	0.4180743944177434	0.0638697152998991
e-type_smote_maxabs_lda_1000.csv	rf_bal_200_20	0.225268817204301	0.0035049475296788	0.2209168500411056	0.2296207843674965	0.3956800697252856	0.0180357364994508	0.3732857450328278	0.4180743944177434	0.0638697152998991
e-type_smote_maxabs_lda_1000.csv	rf_bal_200_20	0.225268817204301	0.0035049475296788	0.2209168500411056	0.2296207843674965	0.3956800697252856	0.0180357364994508	0.3732857450328278	0.4180743944177434	0.0638697152998991
e-type_smote_maxabs_lda_1000.csv	rf_100_10	0.21344086021505376	0.010165414194187653	0.2008188313833014	0.22606288904680613	0.34406307132882935	0.020667116091911193	0.3184014573308055	0.3697246853268532	0.06028890441480835
e-type_smote_maxabs_lda_1000.csv	rf_100_10	0.2134408602150537	0.0101654141941876	0.2008188313833014	0.2260628890468061	0.3440630713288293	0.0206671160919111	0.3184014573308055	0.3697246853268532	0.0602889044148083
e-type_smote_maxabs_lda_1000.csv	rf_100_10	0.2134408602150537	0.0101654141941876	0.2008188313833014	0.2260628890468061	0.3440630713288293	0.0206671160919111	0.3184014573308055	0.3697246853268532	0.0602889044148083
e-type_smote_maxabs_lda_1000.csv	rf_bal_100_10	0.2129032258064516	0.0051708021671159	0.2064828269137097	0.2193236246991935	0.3420996626469105	0.0060067883526775	0.3346412498045611	0.3495580754892599	0.0599539662875504
e-type_smote_maxabs_lda_1000.csv	rf_bal_100_10	0.2129032258064516	0.0051708021671159	0.2064828269137097	0.2193236246991935	0.3420996626469105	0.0060067883526775	0.3346412498045611	0.3495580754892599	0.0599539662875504
e-type_smote_maxabs_lda_1000.csv	rf_bal_100_10	0.2129032258064516	0.005170802167115949	0.2064828269137097	0.2193236246991935	0.3420996626469105	0.006006788352677538	0.3346412498045611	0.3495580754892599	0.05995396628755044
e-type_smote_maxabs_lda_1000.csv	rf_200_10	0.2096774193548387	0.0053763440860215	0.20300180646127	0.2163530322484073	0.3366393139502718	0.0102939733727422	0.3238576578148695	0.3494209700856741	0.0601675706835269
e-type_smote_maxabs_lda_1000.csv	rf_200_10	0.2096774193548387	0.0053763440860215	0.20300180646127	0.2163530322484073	0.3366393139502718	0.0102939733727422	0.3238576578148695	0.3494209700856741	0.0601675706835269
e-type_smote_maxabs_lda_1000.csv	rf_200_10	0.2096774193548387	0.005376344086021511	0.20300180646127006	0.21635303224840732	0.3366393139502718	0.010293973372742253	0.3238576578148695	0.3494209700856741	0.06016757068352692
e-type_smote_maxabs_lda_1000.csv	logistic_l2_3	0.2032258064516129	0.0024043741693546	0.2002403816073141	0.2062112312959116	0.2160944432931149	0.0075094675913051	0.2067702077393134	0.2254186788469165	0.0655217760079961
e-type_smote_maxabs_lda_1000.csv	logistic_l1_1	0.2032258064516129	0.0024043741693546	0.2002403816073141	0.2062112312959116	0.2170356792520085	0.0053921009407773	0.2103405016391646	0.2237308568648525	0.0654336409281017
e-type_smote_maxabs_lda_1000.csv	logistic_l1_3	0.2032258064516129	0.0024043741693546	0.2002403816073141	0.2062112312959116	0.2160292539358109	0.0074161082730001	0.2068209392864455	0.2252375685851763	0.0655360867843878
e-type_smote_maxabs_lda_1000.csv	logistic_l1_balanced_1	0.2032258064516129	0.0024043741693546	0.2002403816073141	0.2062112312959116	0.2170356792520085	0.0053921009407773	0.2103405016391646	0.2237308568648525	0.0654336372714529
e-type_smote_maxabs_lda_1000.csv	logistic_l2_3	0.2032258064516129	0.0024043741693546	0.2002403816073141	0.2062112312959116	0.2160944432931149	0.0075094675913051	0.2067702077393134	0.2254186788469165	0.0655217760079961
e-type_smote_maxabs_lda_1000.csv	logistic_l1_1	0.2032258064516129	0.0024043741693546	0.2002403816073141	0.2062112312959116	0.2170356792520085	0.0053921009407773	0.2103405016391646	0.2237308568648525	0.0654336409281017
e-type_smote_maxabs_lda_1000.csv	logistic_l1_3	0.2032258064516129	0.0024043741693546	0.2002403816073141	0.2062112312959116	0.2160292539358109	0.0074161082730001	0.2068209392864455	0.2252375685851763	0.0655360867843878
e-type_smote_maxabs_lda_1000.csv	logistic_l1_balanced_1	0.2032258064516129	0.0024043741693546	0.2002403816073141	0.2062112312959116	0.2170356792520085	0.0053921009407773	0.2103405016391646	0.2237308568648525	0.0654336372714529
e-type_smote_maxabs_lda_1000.csv	logistic_l2_3	0.2032258064516129	0.0024043741693546244	0.20024038160731417	0.20621123129591162	0.21609444329311497	0.007509467591305156	0.2067702077393134	0.22541867884691655	0.06552177600799616
e-type_smote_maxabs_lda_1000.csv	logistic_l1_1	0.2032258064516129	0.0024043741693546244	0.20024038160731417	0.20621123129591162	0.21703567925200856	0.0053921009407773965	0.21034050163916462	0.2237308568648525	0.06543364092810174
e-type_smote_maxabs_lda_1000.csv	logistic_l1_3	0.2032258064516129	0.0024043741693546244	0.20024038160731417	0.20621123129591162	0.21602925393581093	0.007416108273000124	0.20682093928644557	0.2252375685851763	0.06553608678438785
e-type_smote_maxabs_lda_1000.csv	logistic_l1_balanced_1	0.2032258064516129	0.0024043741693546244	0.20024038160731417	0.20621123129591162	0.21703567925200856	0.0053921009407773965	0.21034050163916462	0.2237308568648525	0.06543363727145295
e-type_smote_maxabs_lda_1000.csv	logistic_l2_1	0.20268817204301076	0.002404374169354623	0.19970274719871203	0.2056735968873095	0.2160162817017285	0.005574820730396142	0.2090942275043556	0.22293833589910142	0.06529572066442124
e-type_smote_maxabs_lda_1000.csv	logistic_l2_balanced_1	0.20268817204301076	0.002404374169354623	0.19970274719871203	0.2056735968873095	0.2160162817017285	0.005574820730396142	0.2090942275043556	0.22293833589910142	0.06529572778116201
e-type_smote_maxabs_lda_1000.csv	logistic_l2_1	0.2026881720430107	0.0024043741693546	0.199702747198712	0.2056735968873095	0.2160162817017285	0.0055748207303961	0.2090942275043556	0.2229383358991014	0.0652957206644212
e-type_smote_maxabs_lda_1000.csv	logistic_l2_balanced_1	0.2026881720430107	0.0024043741693546	0.199702747198712	0.2056735968873095	0.2160162817017285	0.0055748207303961	0.2090942275043556	0.2229383358991014	0.065295727781162
e-type_smote_maxabs_lda_1000.csv	logistic_l2_1	0.2026881720430107	0.0024043741693546	0.199702747198712	0.2056735968873095	0.2160162817017285	0.0055748207303961	0.2090942275043556	0.2229383358991014	0.0652957206644212
e-type_smote_maxabs_lda_1000.csv	logistic_l2_balanced_1	0.2026881720430107	0.0024043741693546	0.199702747198712	0.2056735968873095	0.2160162817017285	0.0055748207303961	0.2090942275043556	0.2229383358991014	0.065295727781162
e-type_smote_maxabs_lda_1000.csv	logistic_l1_2	0.20053763440860214	0.0014723724664117354	0.19870944252511222	0.20236582629209207	0.21313880708378313	0.006042582289633	0.20563595019856215	0.22064166396900411	0.06456118459710622
e-type_smote_maxabs_lda_1000.csv	logistic_l1_2	0.2005376344086021	0.0014723724664117	0.1987094425251122	0.202365826292092	0.2131388070837831	0.006042582289633	0.2056359501985621	0.2206416639690041	0.0645611845971062
e-type_smote_maxabs_lda_1000.csv	logistic_l1_2	0.2005376344086021	0.0014723724664117	0.1987094425251122	0.202365826292092	0.2131388070837831	0.006042582289633	0.2056359501985621	0.2206416639690041	0.0645611845971062
e-type_smote_maxabs_lda_1000.csv	mlp_50_lr0.001	0.19838709677419356	0.01548909708697627	0.1791548425566123	0.21761935099177482	0.22084801571032614	0.011770045061715608	0.20623357449995783	0.23546245692069445	0.06653110260697709
e-type_smote_maxabs_lda_1000.csv	mlp_50_lr0.001	0.1983870967741935	0.0154890970869762	0.1791548425566123	0.2176193509917748	0.2208480157103261	0.0117700450617156	0.2062335744999578	0.2354624569206944	0.066531102606977
e-type_smote_maxabs_lda_1000.csv	mlp_50_lr0.001	0.1983870967741935	0.0154890970869762	0.1791548425566123	0.2176193509917748	0.2208480157103261	0.0117700450617156	0.2062335744999578	0.2354624569206944	0.066531102606977
e-type_smote_maxabs_lda_1000.csv	logistic_l2_2	0.1956989247311828	0.0012021870846773	0.1942062123090334	0.1971916371533321	0.1998035863346053	0.00327558857912	0.1957364059229845	0.2038707667462262	0.0636118203912844
e-type_smote_maxabs_lda_1000.csv	logistic_l2_2	0.1956989247311828	0.0012021870846773	0.1942062123090334	0.1971916371533321	0.1998035863346053	0.00327558857912	0.1957364059229845	0.2038707667462262	0.0636118203912844
e-type_smote_maxabs_lda_1000.csv	logistic_l2_2	0.1956989247311828	0.0012021870846773053	0.19420621230903345	0.19719163715333216	0.19980358633460538	0.003275588579120071	0.19573640592298455	0.2038707667462262	0.06361182039128443
e-type_smote_maxabs_lda_1000.csv	lda	0.19301075268817205	0.004808748338709221	0.18703990299957465	0.19898160237676946	0.20958822196361634	0.01818103243125784	0.18701348854354838	0.2321629553836843	0.059698188532391075
e-type_smote_maxabs_lda_1000.csv	lda	0.193010752688172	0.0048087483387092	0.1870399029995746	0.1989816023767694	0.2095882219636163	0.0181810324312578	0.1870134885435483	0.2321629553836843	0.059698188532391
e-type_smote_maxabs_lda_1000.csv	lda	0.193010752688172	0.0048087483387092	0.1870399029995746	0.1989816023767694	0.2095882219636163	0.0181810324312578	0.1870134885435483	0.2321629553836843	0.059698188532391
e-type_smote_maxabs_lda_1000.csv	mlp_128_64_alpha	0.19193548387096773	0.03678967478951191	0.14625506917920605	0.2376158985627294	0.2683232403353156	0.10056218128502742	0.1434588002528565	0.39318768041777474	0.06511442863341259
e-type_smote_maxabs_lda_1000.csv	mlp_128_64_alpha	0.1919354838709677	0.0367896747895119	0.146255069179206	0.2376158985627294	0.2683232403353156	0.1005621812850274	0.1434588002528565	0.3931876804177747	0.0651144286334125
e-type_smote_maxabs_lda_1000.csv	mlp_128_64_alpha	0.1919354838709677	0.0367896747895119	0.146255069179206	0.2376158985627294	0.2683232403353156	0.1005621812850274	0.1434588002528565	0.3931876804177747	0.0651144286334125
e-type_smote_maxabs_lda_1000.csv	mlp_128_64	0.18548387096774194	0.013838212555090053	0.16830146063859527	0.2026662812968886	0.26049718388541	0.03577528798266388	0.21607629677196438	0.3049180709988556	0.07139444281802285
e-type_smote_maxabs_lda_1000.csv	mlp_128_64	0.1854838709677419	0.01383821255509	0.1683014606385952	0.2026662812968886	0.26049718388541	0.0357752879826638	0.2160762967719643	0.3049180709988556	0.0713944428180228
e-type_smote_maxabs_lda_1000.csv	mlp_128_64	0.1854838709677419	0.01383821255509	0.1683014606385952	0.2026662812968886	0.26049718388541	0.0357752879826638	0.2160762967719643	0.3049180709988556	0.0713944428180228
e-type_smote_maxabs_lda_1000.csv	mlp_128_64_es	0.18387096774193545	0.015039355624407919	0.1651971413069248	0.2025447941769461	0.19338070177676758	0.015841461962580905	0.1737109287789165	0.21305047477461866	0.06652812077707632
e-type_smote_maxabs_lda_1000.csv	mlp_128_64_es	0.1838709677419354	0.0150393556244079	0.1651971413069248	0.2025447941769461	0.1933807017767675	0.0158414619625809	0.1737109287789165	0.2130504747746186	0.0665281207770763
e-type_smote_maxabs_lda_1000.csv	mlp_128_64_es	0.1838709677419354	0.0150393556244079	0.1651971413069248	0.2025447941769461	0.1933807017767675	0.0158414619625809	0.1737109287789165	0.2130504747746186	0.0665281207770763
e-type_smote_maxabs_lda_1000.csv	mlp_100_lr0.001	0.18225806451612905	0.013359971655687286	0.16566946869423937	0.19884666033801873	0.22751777264171286	0.031030792373857887	0.18898795491535753	0.2660475903680682	0.06631280833014014
e-type_smote_maxabs_lda_1000.csv	mlp_100_lr0.001	0.182258064516129	0.0133599716556872	0.1656694686942393	0.1988466603380187	0.2275177726417128	0.0310307923738578	0.1889879549153575	0.2660475903680682	0.0663128083301401
e-type_smote_maxabs_lda_1000.csv	mlp_100_lr0.001	0.182258064516129	0.0133599716556872	0.1656694686942393	0.1988466603380187	0.2275177726417128	0.0310307923738578	0.1889879549153575	0.2660475903680682	0.0663128083301401
e-type_smote_maxabs_lda_1000.csv	svm_rbf_3	0.18010752688172044	0.004656050557980848	0.17432627653005905	0.18588877723338182	0.18500697077002673	0.007298415775467954	0.17594479065770574	0.19406915088234772	0.06542703137537906
e-type_smote_maxabs_lda_1000.csv	svm_rbf_3	0.1801075268817204	0.0046560505579808	0.174326276530059	0.1858887772333818	0.1850069707700267	0.0072984157754679	0.1759447906577057	0.1940691508823477	0.065427031375379
e-type_smote_maxabs_lda_1000.csv	svm_rbf_3	0.1801075268817204	0.0046560505579808	0.174326276530059	0.1858887772333818	0.1850069707700267	0.0072984157754679	0.1759447906577057	0.1940691508823477	0.065427031375379
e-type_smote_maxabs_lda_1000.csv	svm_poly_4	0.178494623655914	0.0014723724664117	0.176666431772424	0.1803228155394039	0.4734896370138451	0.0079966505295322	0.4635604839451078	0.4834187900825825	0.0699522063968485
e-type_smote_maxabs_lda_1000.csv	svm_poly_4	0.178494623655914	0.0014723724664117	0.176666431772424	0.1803228155394039	0.4734896370138451	0.0079966505295322	0.4635604839451078	0.4834187900825825	0.0699522063968485
e-type_smote_maxabs_lda_1000.csv	svm_poly_4	0.178494623655914	0.0014723724664117354	0.17666643177242408	0.18032281553940394	0.47348963701384517	0.00799665052953228	0.46356048394510785	0.4834187900825825	0.0699522063968485
e-type_smote_maxabs_lda_1000.csv	svm_sigmoid	0.1650537634408602	0.0092341742136116	0.153588021766677	0.1765195051150433	0.2828301872101753	0.0101215553689734	0.2702626163026949	0.2953977581176557	0.0602127632501357
e-type_smote_maxabs_lda_1000.csv	svm_sigmoid_bal	0.1650537634408602	0.0092341742136116	0.153588021766677	0.1765195051150433	0.2828301872101753	0.0101215553689734	0.2702626163026949	0.2953977581176557	0.0602408402693126
e-type_smote_maxabs_lda_1000.csv	svm_sigmoid	0.1650537634408602	0.0092341742136116	0.153588021766677	0.1765195051150433	0.2828301872101753	0.0101215553689734	0.2702626163026949	0.2953977581176557	0.0602127632501357
e-type_smote_maxabs_lda_1000.csv	svm_sigmoid_bal	0.1650537634408602	0.0092341742136116	0.153588021766677	0.1765195051150433	0.2828301872101753	0.0101215553689734	0.2702626163026949	0.2953977581176557	0.0602408402693126
e-type_smote_maxabs_lda_1000.csv	svm_sigmoid	0.1650537634408602	0.009234174213611656	0.15358802176667702	0.17651950511504338	0.28283018721017533	0.010121555368973472	0.27026261630269494	0.29539775811765573	0.06021276325013579
e-type_smote_maxabs_lda_1000.csv	svm_sigmoid_bal	0.1650537634408602	0.009234174213611656	0.15358802176667702	0.17651950511504338	0.28283018721017533	0.010121555368973472	0.27026261630269494	0.29539775811765573	0.06024084026931261
e-type_smote_maxabs_lda_1000.csv	gaussian_nb	0.16129032258064516	0.0026881720430107503	0.15795251613386085	0.16462812902742946	0.1803327531421751	0.006842998787309573	0.17183604790822077	0.1888294583761294	0.06323992372926081
e-type_smote_maxabs_lda_1000.csv	gaussian_nb	0.1612903225806451	0.0026881720430107	0.1579525161338608	0.1646281290274294	0.1803327531421751	0.0068429987873095	0.1718360479082207	0.1888294583761294	0.0632399237292608
e-type_smote_maxabs_lda_1000.csv	gaussian_nb	0.1612903225806451	0.0026881720430107	0.1579525161338608	0.1646281290274294	0.1803327531421751	0.0068429987873095	0.1718360479082207	0.1888294583761294	0.0632399237292608
e-type_smote_maxabs_lda_1000.csv	mlp_50x2_lr0.001	0.15483870967741936	0.02816814386544029	0.11986333954347789	0.18981407981136084	0.21874808793325898	0.03382379782289048	0.17675029589405294	0.260745879972465	0.0706072398954775
e-type_smote_maxabs_lda_1000.csv	mlp_50x2_lr0.001	0.1548387096774193	0.0281681438654402	0.1198633395434778	0.1898140798113608	0.2187480879332589	0.0338237978228904	0.1767502958940529	0.260745879972465	0.0706072398954775
e-type_smote_maxabs_lda_1000.csv	mlp_50x2_lr0.001	0.1548387096774193	0.0281681438654402	0.1198633395434778	0.1898140798113608	0.2187480879332589	0.0338237978228904	0.1767502958940529	0.260745879972465	0.0706072398954775
e-type_smote_maxabs_lda_1000.csv	svm_rbf_1	0.15376344086021504	0.0022490860928335342	0.15097083162988287	0.1565560500905472	0.15447987286802603	0.009313811262143427	0.14291524873775777	0.1660444969982943	0.06441929780903195
e-type_smote_maxabs_lda_1000.csv	svm_rbf_bal	0.15376344086021504	0.0022490860928335342	0.15097083162988287	0.1565560500905472	0.15447987286802603	0.009313811262143427	0.14291524873775777	0.1660444969982943	0.06446803878215371
e-type_smote_maxabs_lda_1000.csv	svm_rbf_1	0.153763440860215	0.0022490860928335	0.1509708316298828	0.1565560500905472	0.154479872868026	0.0093138112621434	0.1429152487377577	0.1660444969982943	0.0644192978090319
e-type_smote_maxabs_lda_1000.csv	svm_rbf_bal	0.153763440860215	0.0022490860928335	0.1509708316298828	0.1565560500905472	0.154479872868026	0.0093138112621434	0.1429152487377577	0.1660444969982943	0.0644680387821537
e-type_smote_maxabs_lda_1000.csv	svm_rbf_1	0.153763440860215	0.0022490860928335	0.1509708316298828	0.1565560500905472	0.154479872868026	0.0093138112621434	0.1429152487377577	0.1660444969982943	0.0644192978090319
e-type_smote_maxabs_lda_1000.csv	svm_rbf_bal	0.153763440860215	0.0022490860928335	0.1509708316298828	0.1565560500905472	0.154479872868026	0.0093138112621434	0.1429152487377577	0.1660444969982943	0.0644680387821537
e-type_smote_maxabs_lda_1000.csv	svm_rbf_2	0.1478494623655914	0.0091160349235554	0.1365304099946443	0.1591685147365384	0.200244879910953	0.0287037980176142	0.1646044073007687	0.2358853525211372	0.0631556207968851
e-type_smote_maxabs_lda_1000.csv	svm_rbf_2	0.1478494623655914	0.0091160349235554	0.1365304099946443	0.1591685147365384	0.200244879910953	0.0287037980176142	0.1646044073007687	0.2358853525211372	0.0631556207968851
e-type_smote_maxabs_lda_1000.csv	svm_rbf_2	0.1478494623655914	0.009116034923555472	0.13653040999464436	0.15916851473653845	0.200244879910953	0.028703798017614218	0.16460440730076878	0.2358853525211372	0.06315562079688514
e-type_smote_maxabs_lda_1000.csv	svm_rbf_auto	0.14086021505376342	0.005889489865646954	0.13354744751980366	0.14817298258772318	0.17725798597195616	0.011021078114950225	0.16357351005523105	0.19094246188868128	0.06266445827896006
e-type_smote_maxabs_lda_1000.csv	svm_rbf_auto	0.1408602150537634	0.0058894898656469	0.1335474475198036	0.1481729825877231	0.1772579859719561	0.0110210781149502	0.163573510055231	0.1909424618886812	0.06266445827896
e-type_smote_maxabs_lda_1000.csv	svm_rbf_auto	0.1408602150537634	0.0058894898656469	0.1335474475198036	0.1481729825877231	0.1772579859719561	0.0110210781149502	0.163573510055231	0.1909424618886812	0.06266445827896
e-type_gan_maxabs_lda_10000.csv	decision_tree	0.039784946236559135	0.005827818115236236	0.03254875429479057	0.0470211381783277	0.33492705145309654	0.08132562322601013	0.2339479529618757	0.43590614994431737	0.11296647691334598
e-type_gan_maxabs_lda_10000.csv	decision_tree_bal	0.03763440860215054	0.00630432225782719	0.029806558621531833	0.04546225858276924	0.27584128480816117	0.061945568418053244	0.1989257026551962	0.3527568669611261	0.11321948134092348
e-type_gan_maxabs_lda_10000.csv	mlp_50x2_lr0.001	0.03602150537634409	0.007009895059357687	0.027317571049953193	0.04472543970273499	0.10133106312794929	0.039295196704753295	0.05253963207732184	0.15012249417857673	0.08830652271821068
e-type_gan_maxabs_lda_10000.csv	mlp_50x2_lr0.001	0.036021505376344	0.0070098950593576	0.0273175710499531	0.0447254397027349	0.1013310631279492	0.0392951967047532	0.0525396320773218	0.1501224941785767	0.0883065227182106
e-type_gan_maxabs_lda_10000.csv	mlp_100_lr0.001	0.03548387096774193	0.0022490860928335377	0.03269126173740975	0.03827648019807411	0.08413445747691403	0.002519956047373036	0.08100551877583506	0.087263396177993	0.08643483481976127
e-type_gan_maxabs_lda_10000.csv	mlp_128_64_es	0.03548387096774193	0.00398720348768584	0.030533103943569926	0.040434637991913935	0.08429194503531437	0.002831182764890035	0.08077656732381541	0.08780732274681333	0.08608179780616385
e-type_gan_maxabs_lda_10000.csv	mlp_100_lr0.001	0.0354838709677419	0.0022490860928335	0.0326912617374097	0.0382764801980741	0.084134457476914	0.002519956047373	0.081005518775835	0.087263396177993	0.0864348348197612
e-type_gan_maxabs_lda_10000.csv	mlp_128_64_es	0.0354838709677419	0.0039872034876858	0.0305331039435699	0.0404346379919139	0.0842919450353143	0.00283118276489	0.0807765673238154	0.0878073227468133	0.0860817978061638
e-type_gan_maxabs_lda_10000.csv	mlp_50_lr0.001	0.03494623655913979	0.007837300933931856	0.025214942146387847	0.04467753097189173	0.09606676783438077	0.03356642933547439	0.05438854098027144	0.1377449946884901	0.08590205702714783
e-type_gan_maxabs_lda_10000.csv	rf_100_20	0.03494623655913978	0.004250373199151047	0.02966870117882376	0.0402237719394558	0.3188246994547893	0.21822177051753286	0.047866583378884664	0.5897828155306939	0.0878802336853326
e-type_gan_maxabs_lda_10000.csv	mlp_50_lr0.001	0.0349462365591397	0.0078373009339318	0.0252149421463878	0.0446775309718917	0.0960667678343807	0.0335664293354743	0.0543885409802714	0.1377449946884901	0.0859020570271478
e-type_gan_maxabs_lda_10000.csv	rf_200_20	0.034408602150537634	0.005827818115236236	0.027172410208769072	0.041644794092306196	0.2541468647406293	0.16515723565961568	0.04907707117922924	0.4592166583020294	0.08776687113464773
e-type_gan_maxabs_lda_10000.csv	rf_bal_200_20	0.03387096774193549	0.0064739755799958585	0.025832465339004282	0.04190947014486669	0.3651807805316577	0.16490467457176478	0.16042458298038925	0.5699369780829262	0.08773280709308655
e-type_gan_maxabs_lda_10000.csv	extra_tree	0.03225806451612903	0.008500746398302094	0.021702993755496985	0.042813135276761075	0.23709743035811243	0.1410092435118027	0.06201132927555897	0.4121835314406659	0.08762459203036052
e-type_gan_maxabs_lda_10000.csv	mlp_128_64	0.030107526881720432	0.0039872034876858396	0.02515675985754843	0.035058293905892435	0.07920947290527157	0.011035012811728062	0.06550769477723152	0.09291125103331162	0.08835382017400344
e-type_gan_maxabs_lda_10000.csv	mlp_128_64	0.0301075268817204	0.0039872034876858	0.0251567598575484	0.0350582939058924	0.0792094729052715	0.011035012811728	0.0655076947772315	0.0929112510333116	0.0883538201740034
e-type_gan_maxabs_lda_10000.csv	mlp_128_64_alpha	0.02956989247311828	0.004250373199151046	0.02429235709280226	0.0348474278534343	0.08369601720265137	0.0073742224301834814	0.07453971069634585	0.09285232370895688	0.08785082065904523
e-type_gan_maxabs_lda_10000.csv	mlp_128_64_alpha	0.0295698924731182	0.004250373199151	0.0242923570928022	0.0348474278534343	0.0836960172026513	0.0073742224301834	0.0745397106963458	0.0928523237089568	0.0878508206590452
e-type_gan_maxabs_lda_10000.csv	rf_100_10	0.027419354838709675	0.0022490860928335373	0.024626745608377496	0.030211964069041853	0.07918672132028945	0.0001868630564620615	0.07895470019048619	0.07941874245009271	0.0777279726807161
e-type_gan_maxabs_lda_10000.csv	rf_200_10	0.026881720430107524	0.0026881720430107538	0.023543913983323204	0.030219526876891844	0.0761651734658751	0.00408874985514308	0.07108831997308308	0.08124202695866713	0.07762351092055932
e-type_gan_maxabs_lda_10000.csv	rf_bal_100_10	0.025806451612903226	0.0036065612540319195	0.021328314346455164	0.030284588879351287	0.08360470399470338	0.01916455636672984	0.05980876431258815	0.1074006436768186	0.07746687394715213
e-type_gan_maxabs_lda_10000.csv	logistic_l2_1	0.011827956989247313	0.0024043741693546127	0.008842532144948605	0.01481338183354602	0.000632257514300014	0.00012548751537069537	0.00047644418424017983	0.0007880708443598482	0.05597550335236523
e-type_gan_maxabs_lda_10000.csv	logistic_l2_2	0.011827956989247313	0.0024043741693546127	0.008842532144948605	0.01481338183354602	0.000632257514300014	0.00012548751537069537	0.00047644418424017983	0.0007880708443598482	0.05597533282963694
e-type_gan_maxabs_lda_10000.csv	logistic_l2_3	0.011827956989247313	0.0024043741693546127	0.008842532144948605	0.01481338183354602	0.000632257514300014	0.00012548751537069537	0.00047644418424017983	0.0007880708443598482	0.05597551850583917
e-type_gan_maxabs_lda_10000.csv	logistic_l1_1	0.011827956989247313	0.0024043741693546127	0.008842532144948605	0.01481338183354602	0.000632257514300014	0.00012548751537069537	0.00047644418424017983	0.0007880708443598482	0.05597516734642873
e-type_gan_maxabs_lda_10000.csv	logistic_l1_2	0.011827956989247313	0.0024043741693546127	0.008842532144948605	0.01481338183354602	0.0006316261174607866	0.00012484039146479526	0.0004766162978572855	0.0007866359370642876	0.0559720003677062
e-type_gan_maxabs_lda_10000.csv	logistic_l1_3	0.011827956989247313	0.0024043741693546127	0.008842532144948605	0.01481338183354602	0.000632257514300014	0.00012548751537069537	0.00047644418424017983	0.0007880708443598482	0.05597548407032358
e-type_gan_maxabs_lda_10000.csv	logistic_l2_balanced_1	0.011827956989247313	0.0024043741693546127	0.008842532144948605	0.01481338183354602	0.000632257514300014	0.00012548751537069537	0.00047644418424017983	0.0007880708443598482	0.055975507828327276
e-type_gan_maxabs_lda_10000.csv	logistic_l1_balanced_1	0.011827956989247313	0.0024043741693546127	0.008842532144948605	0.01481338183354602	0.000632257514300014	0.00012548751537069537	0.00047644418424017983	0.0007880708443598482	0.05597516701780371
e-type_gan_maxabs_lda_1000.csv	lda	0.496236559139785	0.008834234798470415	0.48526740783884537	0.5072057104407246	0.38781782556906863	0.0012123202182813787	0.38631253119973413	0.38932311993840313	0.051378338239467004
e-type_gan_maxabs_lda_1000.csv	logistic_l2_2	0.4924731182795699	0.007928968389114307	0.482628003687911	0.5023182328712289	0.38962117728153384	0.002654452000110989	0.38632523979803607	0.3929171147650316	0.051225197110171296
e-type_gan_maxabs_lda_1000.csv	logistic_l2_1	0.4919354838709678	0.00911603492355546	0.48061643150002076	0.5032545362419149	0.38948358912105296	0.0024561837293782104	0.38643383421131017	0.39253334403079576	0.051211293175045136
e-type_gan_maxabs_lda_1000.csv	logistic_l2_3	0.4919354838709678	0.00911603492355546	0.48061643150002076	0.5032545362419149	0.38948358912105296	0.0024561837293782104	0.38643383421131017	0.39253334403079576	0.05120981575117518
e-type_gan_maxabs_lda_1000.csv	logistic_l1_1	0.4919354838709678	0.00911603492355546	0.48061643150002076	0.5032545362419149	0.38948358912105296	0.0024561837293782104	0.38643383421131017	0.39253334403079576	0.0512133282096748
e-type_gan_maxabs_lda_1000.csv	logistic_l1_3	0.4919354838709678	0.00911603492355546	0.48061643150002076	0.5032545362419149	0.38948358912105296	0.0024561837293782104	0.38643383421131017	0.39253334403079576	0.05121007099154886
e-type_gan_maxabs_lda_1000.csv	logistic_l2_balanced_1	0.4919354838709678	0.00911603492355546	0.48061643150002076	0.5032545362419149	0.38948358912105296	0.0024561837293782104	0.38643383421131017	0.39253334403079576	0.051211251754593845
e-type_gan_maxabs_lda_1000.csv	logistic_l1_balanced_1	0.4919354838709678	0.00911603492355546	0.48061643150002076	0.5032545362419149	0.38948358912105296	0.0024561837293782104	0.38643383421131017	0.39253334403079576	0.051213320564933426
e-type_gan_maxabs_lda_1000.csv	logistic_l1_2	0.4908602150537634	0.01149959657860614	0.47658157998824097	0.5051388501192858	0.3891808976067468	0.0021165509367822217	0.38655285250817983	0.39180894270531375	0.051245799161757734
e-type_gan_maxabs_lda_1000.csv	svm_poly_3	0.3494623655913978	0.015558920568266446	0.3301434140708693	0.36878131711192635	0.39045664625367776	0.006928242060411965	0.38185409751642313	0.3990591949909324	0.042466631768336795
e-type_gan_maxabs_lda_1000.csv	gaussian_nb	0.2618279569892473	0.0067472582785006036	0.2534501292982508	0.27020578468024387	0.3033835422411325	0.0021218852375336464	0.30074887373336695	0.30601821074889807	0.05555165107786787
e-type_gan_maxabs_lda_1000.csv	mlp_128_64_es	0.2553763440860215	0.04425289686331809	0.20042911523461504	0.31032357293742796	0.31953527462791537	0.0013131687994903233	0.31790476020602376	0.32116578904980697	0.06062023869629272
e-type_gan_maxabs_lda_1000.csv	mlp_50_lr0.001	0.2521505376344086	0.033917871603413995	0.21003593756875158	0.2942651377000656	0.31743908600422405	0.009176921586737382	0.30604443285563326	0.32883373915281483	0.06133001106864522
e-type_gan_maxabs_lda_1000.csv	mlp_128_64_alpha	0.2478494623655914	0.05360864813240812	0.18128553398720665	0.3144133907439762	0.31752921660789235	0.022390669822491938	0.2897275279936366	0.3453309052221481	0.0621700987488901
e-type_gan_maxabs_lda_1000.csv	mlp_128_64	0.23763440860215054	0.05468299630052125	0.16973650078188357	0.3055323164224175	0.3283012383443018	0.008724904740400566	0.31746783824038904	0.33913463844821456	0.06444894753704393
e-type_gan_maxabs_lda_1000.csv	rf_bal_100_10	0.23010752688172045	0.011961610463057522	0.21525522580920445	0.24495982795423646	0.30936482996229336	0.009250633399231142	0.29787865150988674	0.3208510084147	0.05973039210947172
e-type_gan_maxabs_lda_1000.csv	svm_rbf_2	0.22688172043010754	0.009427783826209776	0.2151755806702551	0.23858786018995998	0.3153417693584882	0.004775595473036759	0.3094120843896335	0.32127145432734283	0.062311547799857356
e-type_gan_maxabs_lda_1000.csv	extra_tree_bal	0.22526881720430106	0.014275180696077163	0.20754383926612865	0.24299379514247346	0.33597911151186644	0.017814141485087722	0.3138599333709248	0.35809828965280804	0.06314870335230867
e-type_gan_maxabs_lda_1000.csv	mlp_50x2_lr0.001	0.2241935483870968	0.03206708700741214	0.18437700092272538	0.2640100958514682	0.31467363397181664	0.01624437476539799	0.2945035786522922	0.33484368929134106	0.0641883728488438
e-type_gan_maxabs_lda_1000.csv	rf_200_20	0.22419354838709676	0.006473975579995852	0.21615504598416557	0.23223205079002796	0.3219024897365877	0.012633105831920857	0.3062164170395935	0.3375885624335819	0.06490632888132522
e-type_gan_maxabs_lda_1000.csv	rf_100_10	0.2231182795698925	0.010919406457844033	0.20956004568943384	0.23667651345035115	0.30570550641349736	0.007718858977939986	0.2961212771133774	0.31528973571361735	0.05935470849057176
e-type_gan_maxabs_lda_1000.csv	svm_rbf_auto	0.22311827956989244	0.004250373199151044	0.2178407441895764	0.22839581495020847	0.3101352617732668	0.0018823966077109056	0.30779795767513124	0.3124725658714023	0.062181541681353994
e-type_gan_maxabs_lda_1000.csv	rf_bal_200_20	0.2225806451612903	0.010819683762095746	0.20914623336194613	0.2360150569606345	0.31891966781701486	0.005253016308622265	0.31239718658462134	0.3254421490494084	0.06476121151259462
e-type_gan_maxabs_lda_1000.csv	rf_200_10	0.221505376344086	0.009986115925272416	0.20910597571778597	0.23390477697038606	0.3029072476202452	0.007164236090291822	0.29401167359229774	0.3118028216481926	0.05947991007151391
e-type_gan_maxabs_lda_1000.csv	rf_100_20	0.2209677419354839	0.009766614045475781	0.20884088889086538	0.23309459498010243	0.31605426730823133	0.007028791903496117	0.30732686945079407	0.3247816651656686	0.06476724950499013
e-type_gan_maxabs_lda_1000.csv	mlp_100_lr0.001	0.21989247311827959	0.022603035494169792	0.19182709769504708	0.2479578485415121	0.30700034581627805	0.004750515366354223	0.30110180191296226	0.31289888971959384	0.06351999216039471
e-type_gan_maxabs_lda_1000.csv	svm_rbf_1	0.21774193548387094	0.007603298722435988	0.2083011931926335	0.2271826777751084	0.3098032709438773	0.003828268024245416	0.30504984836269705	0.3145566935250575	0.06135578763390272
e-type_gan_maxabs_lda_1000.csv	svm_rbf_bal	0.21774193548387094	0.007603298722435988	0.2083011931926335	0.2271826777751084	0.3098032709438773	0.003828268024245416	0.30504984836269705	0.3145566935250575	0.06122776130492039
e-type_gan_maxabs_lda_1000.csv	extra_tree	0.2161290322580645	0.01325135219770563	0.19967530530665506	0.23258275920947397	0.3219000342328606	0.00840108145649204	0.3114687138423572	0.33233135462336405	0.06345010752688171
e-type_gan_maxabs_lda_1000.csv	svm_rbf_3	0.2150537634408602	0.005029109390825185	0.20880929936724407	0.2212982275144763	0.31309529116156787	0.0027626375465688727	0.30966502357990733	0.3165255587432284	0.062432869066053345
e-type_gan_maxabs_lda_1000.csv	svm_sigmoid	0.20913978494623656	0.06580258615395373	0.12743508273017057	0.29084448716230255	0.2919250110977389	0.07975447069132396	0.19289675614452445	0.3909532660509533	0.055155184413947234
e-type_gan_maxabs_lda_1000.csv	svm_sigmoid_bal	0.20913978494623656	0.06580258615395373	0.12743508273017057	0.29084448716230255	0.2919250110977389	0.07975447069132396	0.19289675614452445	0.3909532660509533	0.055095879835182035
e-type_gan_maxabs_lda_1000.csv	decision_tree	0.19623655913978494	0.014096893120566552	0.1787329544654511	0.21374016381411878	0.3284518157760976	0.009861854358104358	0.3162067062641105	0.3406969252880847	0.09456040480708414
e-type_gan_maxabs_lda_1000.csv	decision_tree_bal	0.19408602150537635	0.01777042352799829	0.1720211263778277	0.216150916632925	0.3271527900888039	0.013239211860837258	0.31071413735660997	0.3435914428209978	0.09481340923466161
e-type_gan_maxabs_lda_1000.csv	svm_poly_4	0.04838709677419355	0.005376344086021507	0.04171148388062491	0.05506270966776219	0.37058851347617294	0.0882258700971439	0.26104162686634713	0.48013540008599875	0.06528486918514023
e-type_gan_maxabs_lda_100.csv	svm_sigmoid	0.39247311827956993	0.024268104953316914	0.3623402860544058	0.42260595050473404	0.386374967149258	0.014618748185129118	0.3682233938289765	0.4045265404695395	0.046638686312729695
e-type_gan_maxabs_lda_100.csv	svm_sigmoid_bal	0.39247311827956993	0.024268104953316914	0.3623402860544058	0.42260595050473404	0.386374967149258	0.014618748185129118	0.3682233938289765	0.4045265404695395	0.04664863995201435
e-type_gan_maxabs_lda_100.csv	logistic_l1_2	0.27311827956989243	0.01338698881504166	0.2564961375138987	0.28974042162588615	0.41679292881112173	0.010912835066976935	0.40324285439012086	0.4303430032321226	0.04757121152422653
e-type_gan_maxabs_lda_100.csv	logistic_l2_2	0.25161290322580643	0.008197822947299404	0.24143396160849606	0.2617918448431168	0.43201521488973765	0.013848610556531034	0.41481989373654843	0.4492105360429269	0.04918748405241783
e-type_gan_maxabs_lda_100.csv	mlp_128_64_es	0.2370967741935484	0.06904469288065805	0.1513664647765994	0.3228270836104974	0.3788869304879252	0.04695626266171867	0.32058302965066937	0.43719083132518105	0.05398823541389088
e-type_gan_maxabs_lda_100.csv	svm_rbf_3	0.23548387096774195	0.013785893983825898	0.21836642272497145	0.2526013192105125	0.39454584667542414	0.016314874699197006	0.3742882541262257	0.4148034392246226	0.05170400032483623
e-type_gan_maxabs_lda_100.csv	mlp_128_64_alpha	0.23118279569892475	0.015674601867863708	0.21172020687342086	0.25064538452442864	0.44091920627484865	0.020469361753277363	0.41550313671959505	0.46633527583010226	0.06010537076786322
e-type_gan_maxabs_lda_100.csv	mlp_50x2_lr0.001	0.22688172043010754	0.03062629111532497	0.18885415735370065	0.26490928350651444	0.45584564650907844	0.021541180249215412	0.4290987385148096	0.48259255450334726	0.05884590158098606
e-type_gan_maxabs_lda_100.csv	logistic_l1_1	0.22580645161290325	0.01793234417221281	0.2035405054508675	0.248072397774939	0.4494306964625072	0.006682142025415259	0.4411337212786647	0.45772767164634975	0.05329524234042956
e-type_gan_maxabs_lda_100.csv	logistic_l1_balanced_1	0.22580645161290325	0.01793234417221281	0.2035405054508675	0.248072397774939	0.4494306964625072	0.006682142025415259	0.4411337212786647	0.45772767164634975	0.05329516608201357
e-type_gan_maxabs_lda_100.csv	logistic_l2_1	0.2241935483870968	0.018192391737299595	0.20160471052567222	0.24678238624852136	0.4475606778517145	0.00780007767059755	0.43787560222494043	0.45724575347848856	0.05321753245064694
e-type_gan_maxabs_lda_100.csv	logistic_l2_balanced_1	0.2241935483870968	0.018192391737299595	0.20160471052567222	0.24678238624852136	0.4475606778517145	0.00780007767059755	0.43787560222494043	0.45724575347848856	0.053217650263804095
e-type_gan_maxabs_lda_100.csv	mlp_100_lr0.001	0.22365591397849466	0.027702522640834948	0.18925868895594516	0.25805313900104415	0.473767404161474	0.028168975965274394	0.4387910008391256	0.5087438074838224	0.056624106121212534
e-type_gan_maxabs_lda_100.csv	logistic_l2_3	0.21989247311827956	0.017149610653480196	0.19859841898664143	0.24118652724991768	0.44770509332970165	0.008764391249460669	0.43682266424907423	0.4585875224103291	0.05405356769227672
e-type_gan_maxabs_lda_100.csv	logistic_l1_3	0.21989247311827956	0.017149610653480196	0.19859841898664143	0.24118652724991768	0.4481273503822522	0.009012055971379352	0.4369374049327932	0.4593172958317112	0.05407324612860611
e-type_gan_maxabs_lda_100.csv	mlp_128_64	0.21989247311827956	0.011148624383509517	0.20604962759177914	0.23373531864477998	0.4215328343377961	0.015535672436612994	0.4022427491853672	0.440822919490225	0.06199414285352656
e-type_gan_maxabs_lda_100.csv	gaussian_nb	0.21774193548387094	0.02020604351931843	0.19265281869979473	0.24283105226794716	0.4273524184525458	0.019549867598993506	0.40307805168522526	0.4516267852198663	0.055634360498494836
e-type_gan_maxabs_lda_100.csv	lda	0.2129032258064516	0.01065140470761233	0.19967776005071125	0.22612869156219195	0.42751674752085334	0.046029705920415255	0.3703633188315669	0.48467017621013975	0.050409151396820104
e-type_gan_maxabs_lda_100.csv	svm_rbf_1	0.21021505376344085	0.011468133875108356	0.19597548480413776	0.22445462272274394	0.420344744201405	0.03467846129037624	0.3772857473040419	0.4634037410987681	0.0552394521048721
e-type_gan_maxabs_lda_100.csv	svm_rbf_bal	0.21021505376344085	0.011468133875108356	0.19597548480413776	0.22445462272274394	0.420344744201405	0.03467846129037624	0.3772857473040419	0.4634037410987681	0.05501726400520818
e-type_gan_maxabs_lda_100.csv	mlp_50_lr0.001	0.2096774193548387	0.02249086092833537	0.18175132705151692	0.23760351165816046	0.4417928459128416	0.03001147366260685	0.40452867953294214	0.4790570122927411	0.05644088992223102
e-type_gan_maxabs_lda_100.csv	svm_poly_3	0.1967741935483871	0.03061449134947944	0.15876128181641783	0.23478710528035637	0.4428538997164376	0.02763230097529198	0.40854386640788676	0.4771639330249885	0.05176140295777822
e-type_gan_maxabs_lda_100.csv	extra_tree	0.1935483870967742	0.012751119597453143	0.17771578095582613	0.20938099323772225	0.36256199179619253	0.022332032036678724	0.3348331116095154	0.39029087198286966	0.06261542694497155
e-type_gan_maxabs_lda_100.csv	extra_tree_bal	0.19193548387096776	0.018487902004354195	0.1689797215498419	0.21489124619209363	0.3739418840940686	0.022959388442241782	0.3454340380445613	0.4024497301435759	0.06253934851359898
e-type_gan_maxabs_lda_100.csv	rf_bal_100_10	0.1903225806451613	0.00994986856092566	0.17796818706620038	0.20267697422412223	0.35115007795771463	0.012069070745611669	0.33616434732111433	0.36613580859431494	0.05875161268573775
e-type_gan_maxabs_lda_100.csv	rf_200_10	0.189247311827957	0.018291425630326884	0.16653550714695847	0.21195911650895555	0.34701029048814896	0.028665690433452753	0.3114171346932766	0.38260344628302134	0.058221289462787686
e-type_gan_maxabs_lda_100.csv	rf_100_10	0.1881720430107527	0.014723724664117374	0.1698901241758533	0.20645396184565207	0.345418459105676	0.022172222887534804	0.31788800818607443	0.3729489100252775	0.05850891809480681
e-type_gan_maxabs_lda_100.csv	rf_100_20	0.18655913978494626	0.016417668263013413	0.16617391216830993	0.2069443674015826	0.36166775018130776	0.018974690669903146	0.33810755989943614	0.3852279404631794	0.061228998760858765
e-type_gan_maxabs_lda_100.csv	rf_bal_200_20	0.1838709677419355	0.013654220536774507	0.1669170136778881	0.2008249218059829	0.36200731090396393	0.023395432516205277	0.33295804462618606	0.3910565771817418	0.061449443573048955
e-type_gan_maxabs_lda_100.csv	svm_rbf_2	0.1827956989247312	0.013440860215053764	0.1661066666908096	0.19948473115865278	0.40452055058216585	0.011234577854047743	0.3905709797257774	0.4184701214385543	0.05714019887902695
e-type_gan_maxabs_lda_100.csv	rf_200_20	0.18010752688172044	0.014224469414325756	0.16244551531640153	0.19776953844703934	0.33904626651465686	0.025361576092051863	0.30755571054345066	0.37053682248586306	0.06125876529143617
e-type_gan_maxabs_lda_100.csv	svm_rbf_auto	0.1693548387096774	0.016351512178221016	0.14905175472178991	0.1896579226975649	0.396164664099394	0.04119827910835695	0.3450102441425968	0.4473190840561912	0.05721892042135115
e-type_gan_maxabs_lda_100.csv	decision_tree_bal	0.16397849462365593	0.010752688172043006	0.15062726883651867	0.1773297204107932	0.35480303567592875	0.020449088180390353	0.3294121390862439	0.3801939322656136	0.09835547122074635
e-type_gan_maxabs_lda_100.csv	decision_tree	0.16129032258064518	0.016016633451361537	0.14140304545166343	0.18117759970962694	0.340415910706896	0.01540460320639266	0.3212885694989039	0.35954325191488806	0.09867172675521821
e-type_gan_maxabs_lda_100.csv	svm_poly_4	0.08978494623655914	0.020080483222562468	0.06485173315256856	0.11471815932054971	0.1185467711037785	0.01810149463815399	0.09607079689790417	0.1410227453096528	0.0591563129574628
e-type_flow_maxabs_lda_10000.csv	lda	0.4080645161290322	0.004808748338709245	0.40209366644043476	0.4140353658176297	0.25824971849240763	0.0006165061972703945	0.2574842249425875	0.25901521204222777	0.05359898084973012
e-type_flow_maxabs_lda_10000.csv	svm_rbf_2	0.3876344086021505	0.0035049475296788403	0.383282441438955	0.39198637576534595	0.3083973143489083	0.04640949701529569	0.2507723127302705	0.36602231596754614	0.05433841075305251
e-type_flow_maxabs_lda_10000.csv	svm_rbf_1	0.360752688172043	0.0058278181152362305	0.3535164962302744	0.36798888011381153	0.30937314805509314	0.048834477579541874	0.248737135373487	0.3700091607366993	0.05399285344325179
e-type_flow_maxabs_lda_10000.csv	svm_rbf_bal	0.360752688172043	0.0058278181152362305	0.3535164962302744	0.36798888011381153	0.30937314805509314	0.048834477579541874	0.248737135373487	0.3700091607366993	0.05398371272285144
e-type_flow_maxabs_lda_10000.csv	mlp_50_lr0.001	0.2172043010752688	0.0443914804662028	0.1620849979534189	0.2723236041971186	0.3068534035122456	0.0254243176931985	0.275284943553706	0.3384218634707853	0.0557613313030588
e-type_flow_maxabs_lda_10000.csv	mlp_50_lr0.001	0.2172043010752688	0.044391480466202865	0.16208499795341896	0.27232360419711865	0.30685340351224566	0.025424317693198556	0.275284943553706	0.33842186347078534	0.05576133130305886
e-type_flow_maxabs_lda_10000.csv	extra_tree_bal	0.21236559139784944	0.010058218781650379	0.1998766632506172	0.22485451954508168	0.32602596782839166	0.005576509682791505	0.31910181651963476	0.33295011913714856	0.060387343453510434
e-type_flow_maxabs_lda_10000.csv	extra_tree	0.21129032258064515	0.015039355624407917	0.1926164961456345	0.2299641490156558	0.3256398362940257	0.005770590331647539	0.3184747020308362	0.3328049705572152	0.06042748893105628
e-type_flow_maxabs_lda_10000.csv	rf_200_10	0.19623655913978494	0.027082582902701456	0.1626090909711317	0.2298640273084382	0.2949429201234287	0.005435186929995571	0.28819424418894557	0.30169159605791185	0.05340097562710725
e-type_flow_maxabs_lda_10000.csv	rf_bal_100_10	0.1935483870967742	0.020909071486698988	0.16758634579587114	0.21951042839767723	0.2964617422428698	0.011006003295428293	0.2827959841868245	0.3101275002989151	0.053589725698975944
e-type_flow_maxabs_lda_10000.csv	mlp_128_64_es	0.19301075268817208	0.051054041995417326	0.1296187867796792	0.25640271859666497	0.31238590738446886	0.0159247682772393	0.2926126959348834	0.3321591188340543	0.059651609530884865
e-type_flow_maxabs_lda_10000.csv	mlp_128_64_es	0.193010752688172	0.0510540419954173	0.1296187867796792	0.2564027185966649	0.3123859073844688	0.0159247682772393	0.2926126959348834	0.3321591188340543	0.0596516095308848
e-type_flow_maxabs_lda_10000.csv	rf_100_10	0.18548387096774194	0.02913909057618118	0.1493029112588991	0.22166483067658477	0.29303304273956676	0.009514186403013849	0.2812196200107447	0.30484646546838884	0.053656184005977846
e-type_flow_maxabs_lda_10000.csv	mlp_100_lr0.001	0.15591397849462366	0.043636244840720234	0.10173242425909648	0.21009553273015083	0.28693182233964665	0.02263223622695172	0.2588301894177977	0.3150334552614956	0.05851626737812787
e-type_flow_maxabs_lda_10000.csv	mlp_100_lr0.001	0.1559139784946236	0.0436362448407202	0.1017324242590964	0.2100955327301508	0.2869318223396466	0.0226322362269517	0.2588301894177977	0.3150334552614956	0.0585162673781278
e-type_flow_maxabs_lda_10000.csv	mlp_128_64	0.15161290322580645	0.04840949302476756	0.09150457856565622	0.21172122788595668	0.28426131717624753	0.025467880696280996	0.25263876660512674	0.3158838677473683	0.0632180694277004
e-type_flow_maxabs_lda_10000.csv	mlp_128_64	0.1516129032258064	0.0484094930247675	0.0915045785656562	0.2117212278859566	0.2842613171762475	0.0254678806962809	0.2526387666051267	0.3158838677473683	0.0632180694277004
e-type_flow_maxabs_lda_10000.csv	mlp_128_64_alpha	0.14623655913978492	0.03435185172199976	0.10358310158494376	0.18889001669462607	0.2903648754858395	0.0223503330570305	0.2626132715810612	0.3181164793906178	0.06387090101238675
e-type_flow_maxabs_lda_10000.csv	mlp_128_64_alpha	0.1462365591397849	0.0343518517219997	0.1035831015849437	0.188890016694626	0.2903648754858395	0.0223503330570305	0.2626132715810612	0.3181164793906178	0.0638709010123867
e-type_flow_maxabs_lda_10000.csv	rf_100_20	0.14193548387096772	0.0069581608094326855	0.13329578610018278	0.15057518164175265	0.310356861149175	0.010330050086901675	0.2975304098566275	0.3231833124417225	0.060762460720806634
e-type_flow_maxabs_lda_10000.csv	rf_200_20	0.14193548387096772	0.019046225359051996	0.11828647154095724	0.16558449620097818	0.30985241071217473	0.006615471482525589	0.301638217941179	0.31806660348317045	0.06063724803090098
e-type_flow_maxabs_lda_10000.csv	mlp_50x2_lr0.001	0.14086021505376345	0.04889222599737487	0.08015249824078083	0.20156793186674607	0.2904274332096316	0.03048891820442048	0.2525704411310233	0.3282844252882399	0.06240382620600279
e-type_flow_maxabs_lda_10000.csv	mlp_50x2_lr0.001	0.1408602150537634	0.0488922259973748	0.0801524982407808	0.201567931866746	0.2904274332096316	0.0304889182044204	0.2525704411310233	0.3282844252882399	0.0624038262060027
e-type_flow_maxabs_lda_10000.csv	rf_bal_200_20	0.13709677419354838	0.012608644515654379	0.12144107423231097	0.1527524741547858	0.3080522466300023	0.006495980368671032	0.29998642167318507	0.31611807158681954	0.060711337339493986
e-type_flow_maxabs_lda_10000.csv	svm_rbf_auto	0.1118279569892473	0.0030649877018794004	0.10802227210488635	0.11563364187360825	0.26499209427982345	0.007322495685779385	0.2559000150097888	0.2740841735498581	0.0547439776794975
e-type_flow_maxabs_lda_10000.csv	decision_tree	0.1064516129032258	0.01325135219770563	0.08999788595181636	0.12290533985463524	0.3067231730159943	0.029642337849702813	0.26991734928542543	0.3435289967465631	0.10512333965844403
e-type_flow_maxabs_lda_10000.csv	decision_tree_bal	0.1032258064516129	0.009617496677418447	0.09128410707441807	0.11516750582880773	0.30206260746250396	0.018800016987809354	0.2787193032031219	0.32540591172188604	0.10550284629981026
e-type_flow_maxabs_lda_10000.csv	logistic_l1_2	0.08978494623655915	0.0014723724664117354	0.08795675435306921	0.09161313812004909	0.3253463565989406	0.015998907173461994	0.3054810895510489	0.34521162364683233	0.05540839549894614
e-type_flow_maxabs_lda_10000.csv	logistic_l2_1	0.089247311827957	0.0022490860928335347	0.08645470259762483	0.09203992105828918	0.32531242860668336	0.01603119436611143	0.3054070717140757	0.345217785499291	0.05540800170646406
e-type_flow_maxabs_lda_10000.csv	logistic_l2_2	0.089247311827957	0.0022490860928335347	0.08645470259762483	0.09203992105828918	0.32531242860668336	0.01603119436611143	0.3054070717140757	0.345217785499291	0.055408001332426605
e-type_flow_maxabs_lda_10000.csv	logistic_l2_3	0.089247311827957	0.0022490860928335347	0.08645470259762483	0.09203992105828918	0.32531242860668336	0.01603119436611143	0.3054070717140757	0.345217785499291	0.05540799373996073
e-type_flow_maxabs_lda_10000.csv	logistic_l1_1	0.089247311827957	0.0022490860928335347	0.08645470259762483	0.09203992105828918	0.32531242860668336	0.01603119436611143	0.3054070717140757	0.345217785499291	0.055408034793365854
e-type_flow_maxabs_lda_10000.csv	logistic_l1_3	0.089247311827957	0.0022490860928335347	0.08645470259762483	0.09203992105828918	0.32531242860668336	0.01603119436611143	0.3054070717140757	0.345217785499291	0.055408000446904616
e-type_flow_maxabs_lda_10000.csv	logistic_l2_balanced_1	0.089247311827957	0.0022490860928335347	0.08645470259762483	0.09203992105828918	0.32531242860668336	0.01603119436611143	0.3054070717140757	0.345217785499291	0.05540799048857411
e-type_flow_maxabs_lda_10000.csv	logistic_l1_balanced_1	0.089247311827957	0.0022490860928335347	0.08645470259762483	0.09203992105828918	0.32531242860668336	0.01603119436611143	0.3054070717140757	0.345217785499291	0.05540803474432704
e-type_flow_maxabs_lda_10000.csv	gaussian_nb	0.08118279569892473	0.004808748338709226	0.07521194601032731	0.08715364538752214	0.167323061662705	0.0028901531998083607	0.16373446248520954	0.17091166084020046	0.058598226319592286
e-type_flow_maxabs_lda_10000.csv	svm_rbf_3	0.03387096774193548	0.0014723724664117356	0.032042775858445546	0.035699159625425414	0.003142530548275276	0.0008980297780650304	0.0020274793035370093	0.004257581793013543	0.05570629972283866
e-type_flow_maxabs_lda_1000.csv	logistic_l2_1	0.4091397849462366	0.002249086092833554	0.4063471757159044	0.4119323941765688	0.28426282378055545	0.0007355007585741961	0.2833495789679823	0.2851760685931286	0.05507816999862765
e-type_flow_maxabs_lda_1000.csv	logistic_l2_2	0.4091397849462366	0.002249086092833554	0.4063471757159044	0.4119323941765688	0.28426282378055545	0.0007355007585741961	0.2833495789679823	0.2851760685931286	0.05507821956559533
e-type_flow_maxabs_lda_1000.csv	logistic_l2_3	0.4091397849462366	0.002249086092833554	0.4063471757159044	0.4119323941765688	0.2842807449275088	0.0007659667553364486	0.2833296715835866	0.28523181827143107	0.05507814568706513
e-type_flow_maxabs_lda_1000.csv	logistic_l1_1	0.4091397849462366	0.002249086092833554	0.4063471757159044	0.4119323941765688	0.2842807449275088	0.0007659667553364486	0.2833296715835866	0.28523181827143107	0.05507869700492061
e-type_flow_maxabs_lda_1000.csv	logistic_l1_2	0.4091397849462366	0.002249086092833554	0.4063471757159044	0.4119323941765688	0.2842807449275088	0.0007659667553364486	0.2833296715835866	0.28523181827143107	0.05508355253690622
e-type_flow_maxabs_lda_1000.csv	logistic_l1_3	0.4091397849462366	0.002249086092833554	0.4063471757159044	0.4119323941765688	0.2842807449275088	0.0007659667553364486	0.2833296715835866	0.28523181827143107	0.0550782220371247
e-type_flow_maxabs_lda_1000.csv	logistic_l2_balanced_1	0.4091397849462366	0.002249086092833554	0.4063471757159044	0.4119323941765688	0.2842807449275088	0.0007659667553364486	0.2833296715835866	0.28523181827143107	0.05507813004331784
e-type_flow_maxabs_lda_1000.csv	logistic_l1_balanced_1	0.4091397849462366	0.002249086092833554	0.4063471757159044	0.4119323941765688	0.2842807449275088	0.0007659667553364486	0.2833296715835866	0.28523181827143107	0.055078686798091844
e-type_flow_maxabs_lda_1000.csv	rf_100_10	0.20698924731182794	0.02975261239405733	0.17004649964961577	0.2439319949740401	0.31261586744611647	0.010953794555530647	0.29901493510279364	0.3262167997894393	0.05052348181768912
e-type_flow_maxabs_lda_1000.csv	rf_100_20	0.210752688172043	0.03799748061093467	0.16357258447499978	0.25793279186908624	0.3259603544657198	0.01865161073014994	0.3028013209135816	0.349119388017858	0.055540110675537435
e-type_flow_maxabs_lda_1000.csv	rf_200_10	0.2118279569892473	0.03731624342501936	0.16549372098019277	0.25816219299830184	0.3247667433623517	0.00922568464707585	0.31331154287729635	0.336221943847407	0.0506209584327161
e-type_flow_maxabs_lda_1000.csv	rf_200_20	0.21129032258064515	0.03944382969790252	0.16231433929347905	0.26026630586781124	0.3340419416909399	0.012376601616104654	0.31867436104411223	0.3494095223377676	0.05536114210247066
e-type_flow_maxabs_lda_1000.csv	rf_bal_100_10	0.21774193548387094	0.051603101667882983	0.1536682219472119	0.28181564902052997	0.32277871497242455	0.009870499459733726	0.31052287114898347	0.33503455879586563	0.0507023773826709
e-type_flow_maxabs_lda_1000.csv	rf_bal_200_20	0.1946236559139785	0.03445687138529967	0.1518397992241144	0.23740751260384263	0.3161587286705518	0.016674697761714295	0.2954543567789022	0.33686310056220137	0.05575234769188044
e-type_flow_maxabs_lda_1000.csv	decision_tree	0.18118279569892476	0.017065129299036426	0.15999363902361896	0.20237195237423056	0.33521839718240837	0.011353372530304004	0.3211213232533343	0.3493154711114824	0.09633143580012651
e-type_flow_maxabs_lda_1000.csv	decision_tree_bal	0.17043010752688176	0.019533228090951555	0.14617640143764474	0.19468381361611878	0.32294033087978574	0.016197446241327483	0.3028285450190885	0.34305211674048297	0.0975964579380139
e-type_flow_maxabs_lda_1000.csv	extra_tree	0.282258064516129	0.024783721659389486	0.2514850095901622	0.31303111944209583	0.3432373862460289	0.020901607529186093	0.3172846126724537	0.36919015981960407	0.05407866540164452
e-type_flow_maxabs_lda_1000.csv	extra_tree_bal	0.2951612903225806	0.025030331928999526	0.26408202830325167	0.3262405523419095	0.34870312442484536	0.014265667027599438	0.3309899592663126	0.36641628958337813	0.0537329285262492
e-type_flow_maxabs_lda_1000.csv	lda	0.40591397849462363	0.008285502692162619	0.39562616809474493	0.4162017888945023	0.38692989896467905	0.030222640473712422	0.3494035343578143	0.4244562635715438	0.04351087327091168
e-type_flow_maxabs_lda_1000.csv	gaussian_nb	0.39032258064516123	0.005509113315032037	0.38348211297986096	0.3971630483104615	0.281042760928499	0.0016086257202217163	0.2790453882851151	0.2830401335718829	0.049314005971948946
e-type_flow_maxabs_lda_1000.csv	svm_rbf_1	0.4010752688172043	0.0022490860928335347	0.3982826595868721	0.4038678780475365	0.2844133766373781	0.012098187359704629	0.269391492949309	0.2994352603254472	0.0505654756778828
e-type_flow_maxabs_lda_1000.csv	svm_rbf_2	0.4037634408602151	0.006129975403758829	0.39615207109149314	0.41137481062893705	0.31433601916058335	0.022271940337755265	0.2866817526730504	0.3419902856481163	0.044421477271180385
e-type_flow_maxabs_lda_1000.csv	svm_rbf_3	0.4016129032258065	0.0024043741693546106	0.3986274783815078	0.4045983280701052	0.27647265233127066	0.005027586708915078	0.27023007891696305	0.2827152257455783	0.055247247930956346
e-type_flow_maxabs_lda_1000.csv	svm_rbf_auto	0.2908602150537634	0.015135148666945443	0.2720674458465555	0.3096529842609713	0.31722523388467644	0.021210524756161517	0.290888888911941	0.3435615788574119	0.048034340295132726
e-type_flow_maxabs_lda_1000.csv	svm_rbf_bal	0.4010752688172043	0.0022490860928335347	0.3982826595868721	0.4038678780475365	0.2844133766373781	0.012098187359704629	0.269391492949309	0.2994352603254472	0.04998088937292613
e-type_flow_maxabs_lda_1000.csv	svm_sigmoid	0.15806451612903225	0.11735033321334817	0.012354832200802107	0.3037742000572624	0.22608333150087306	0.030959778514026242	0.18764168912764417	0.26452497387410195	0.05457057667788142
e-type_flow_maxabs_lda_1000.csv	svm_sigmoid_bal	0.15806451612903225	0.11735033321334817	0.012354832200802107	0.3037742000572624	0.22608333150087306	0.030959778514026242	0.18764168912764417	0.26452497387410195	0.054807116946962886
e-type_flow_maxabs_lda_1000.csv	svm_poly_3	0.06881720430107527	0.024386921354928443	0.038536842027634	0.09909756657451654	0.35662630763183367	0.03186665061509467	0.31705863481973273	0.3961939804439346	0.055400455697010166
e-type_flow_maxabs_lda_100.csv	logistic_l2_1	0.4510752688172043	0.014275180696077163	0.4333502908790319	0.4688002467553767	0.38835737116900026	0.004169097977861928	0.383180752304905	0.3935339900330955	0.042422522849869165
e-type_flow_maxabs_lda_100.csv	logistic_l2_2	0.4553763440860215	0.013521264881676667	0.4385874762722667	0.47216521189977634	0.3850844146811302	0.010915478034267583	0.3715310585827961	0.3986377707794643	0.04315133615127293
e-type_flow_maxabs_lda_100.csv	logistic_l2_3	0.4505376344086022	0.01479716015540096	0.43216453336798555	0.4689107354492188	0.3892347240039792	0.0035197989338929462	0.3848643163868483	0.39360513162111005	0.04234129365393287
e-type_flow_maxabs_lda_100.csv	logistic_l1_1	0.4521505376344086	0.01322405793145038	0.4357307009907657	0.4685703742780515	0.38779634049881173	0.005462545610025059	0.3810136942762976	0.39457898672132585	0.04232883760534999
e-type_flow_maxabs_lda_100.csv	logistic_l1_2	0.4725806451612903	0.0064179227883405	0.4646117414917563	0.48054954883082424	0.38184561163624114	0.0035271290315957576	0.37746610250068935	0.38622512077179294	0.04236204193364438
e-type_flow_maxabs_lda_100.csv	logistic_l1_3	0.4521505376344086	0.013494516557001228	0.4353948822524155	0.4689061930164017	0.3932242440813412	0.00810363967353043	0.38316224644430275	0.4032862417183797	0.04231879876640675
e-type_flow_maxabs_lda_100.csv	logistic_l2_balanced_1	0.4532258064516129	0.01311431281467793	0.43694223636844504	0.4695093765347808	0.39283798315502766	0.010062304300816744	0.38034398216573256	0.40533198414432275	0.04241669821404965
e-type_flow_maxabs_lda_100.csv	logistic_l1_balanced_1	0.45376344086021503	0.012230444264599285	0.43857733853482433	0.4689495431856057	0.3905122964792645	0.009679952699244725	0.37849304770829695	0.40253154525023205	0.04232826070067024
e-type_flow_maxabs_lda_100.csv	rf_100_10	0.11236559139784945	0.027374515307744016	0.0783756412719458	0.1463555415237531	0.3280352585322873	0.042176859219968645	0.27566577088154365	0.380404746183031	0.060878120820889545
e-type_flow_maxabs_lda_100.csv	rf_100_20	0.11129032258064517	0.028865010097948646	0.07544967873423417	0.14713096642705617	0.3301368033454013	0.02891555951706536	0.29423339410514293	0.36604021258565966	0.06354738470721359
e-type_flow_maxabs_lda_100.csv	rf_200_10	0.1150537634408602	0.02567169115336198	0.0831781487627245	0.1469293781189959	0.3217551079083531	0.042724599892259886	0.2687055103844735	0.3748047054322327	0.06005685217327263
e-type_flow_maxabs_lda_100.csv	rf_200_20	0.1075268817204301	0.01833088937766916	0.08476607632512245	0.13028768711573774	0.3226003932561994	0.03252023268044093	0.2822211911236863	0.36297959538871244	0.06324004800821906
e-type_flow_maxabs_lda_100.csv	rf_bal_100_10	0.11344086021505377	0.02965530187208949	0.07661893952461549	0.15026278090549205	0.33155583381206744	0.04765398174191934	0.2723856003120666	0.39072606731206827	0.060670529617073775
e-type_flow_maxabs_lda_100.csv	rf_bal_200_20	0.11236559139784945	0.024446112998687427	0.08201173299135815	0.14271944980434076	0.3201756346815297	0.0373736378835072	0.27377013403967443	0.366581135323385	0.06318650838282225
e-type_flow_maxabs_lda_100.csv	decision_tree	0.1456989247311828	0.08565108417646293	0.03934905710214846	0.2520487923602171	0.3605421734779354	0.056053170477058344	0.2909429697113938	0.430141377244477	0.10050600885515497
e-type_flow_maxabs_lda_100.csv	decision_tree_bal	0.1532258064516129	0.09040414903656042	0.04097422930466811	0.2654773835985577	0.35338635076956026	0.06254801679933274	0.2757227301507844	0.4310499713883361	0.09962049335863378
e-type_flow_maxabs_lda_100.csv	extra_tree	0.16129032258064516	0.013031397466172925	0.14510970550061444	0.17747093966067587	0.3657096737343599	0.016573611340731154	0.3451308172123524	0.38628853025636745	0.06295058823529412
e-type_flow_maxabs_lda_100.csv	extra_tree_bal	0.1553763440860215	0.021115416007156433	0.12915809222283983	0.18159459594920316	0.36856185287549653	0.006752628114931253	0.3601773576519278	0.37694634809906524	0.06300330803289059
e-type_flow_maxabs_lda_100.csv	lda	0.4494623655913978	0.014019790118715361	0.43205449693861603	0.46687023424417956	0.4337795925528024	0.021283116548535437	0.40735311296491117	0.46020607214069364	0.0483262562658341
e-type_flow_maxabs_lda_100.csv	gaussian_nb	0.23978494623655916	0.011148624383509532	0.2259421007100587	0.2536277917630596	0.3817727953652764	0.010163959062277598	0.36915257331842943	0.3943930174121234	0.05270700435154606
e-type_flow_maxabs_lda_100.csv	svm_rbf_1	0.2279569892473118	0.03348905699440308	0.18637483284356748	0.26953914565105613	0.42766298078274384	0.017798406471614518	0.40556334024154317	0.4497626213239445	0.05086813137912126
e-type_flow_maxabs_lda_100.csv	svm_rbf_2	0.16344086021505375	0.017254630683743243	0.14201640649274772	0.18486531393735978	0.3927910797227322	0.012214296773392528	0.37762502715583424	0.40795713228963015	0.055436713152422976
e-type_flow_maxabs_lda_100.csv	svm_rbf_3	0.3731182795698925	0.046264682619711624	0.3156730887726731	0.43056347036711196	0.4357844649250951	0.00637901332047981	0.42786387374099305	0.44370505610919714	0.04918139624637059
e-type_flow_maxabs_lda_100.csv	svm_rbf_auto	0.1650537634408602	0.02104685928071332	0.13892063599673765	0.19118689088498275	0.4015790731438571	0.013761650242634812	0.38449172748170535	0.41866641880600886	0.054416490209394854
e-type_flow_maxabs_lda_100.csv	svm_rbf_bal	0.2279569892473118	0.03348905699440308	0.18637483284356748	0.26953914565105613	0.42766298078274384	0.017798406471614518	0.40556334024154317	0.4497626213239445	0.05086405726237133
e-type_flow_maxabs_lda_100.csv	svm_sigmoid	0.27311827956989243	0.028423526640615704	0.23782580983825427	0.3084107493015306	0.41855268171752325	0.032570558062582855	0.3781109923698087	0.45899437106523777	0.049022046285933915
e-type_flow_maxabs_lda_100.csv	svm_sigmoid_bal	0.27311827956989243	0.028423526640615704	0.23782580983825427	0.3084107493015306	0.41855268171752325	0.032570558062582855	0.3781109923698087	0.45899437106523777	0.048998376642662
e-type_flow_maxabs_lda_100.csv	svm_poly_3	0.18387096774193545	0.020170248905703306	0.15882629584091473	0.20891563964295617	0.4817694024189733	0.014211821212305123	0.46412309567074544	0.4994157091672012	0.0493258259098233
e-type_flow_maxabs_lda_100.csv	svm_poly_4	0.04354838709677419	0.015015311875020363	0.02490441491975991	0.06219235927378847	0.08540089461776665	0.054571623747657824	0.017641274086778222	0.15316051514875506	0.05489475468093201
e-type_flow_maxabs_lda_100.csv	mlp_50_lr0.001	0.17311827956989248	0.025044762793230365	0.14202109926598513	0.20421545987379983	0.4075462679929246	0.034382687874384366	0.36485452229782434	0.45023801368802485	0.05904603996335904
e-type_flow_maxabs_lda_100.csv	mlp_100_lr0.001	0.1672043010752688	0.010651404707612342	0.15397883531952844	0.18042976683100914	0.3856051529259366	0.030331293445387073	0.34794387783584557	0.42326642801602765	0.062020039390452295
e-type_flow_maxabs_lda_100.csv	mlp_50x2_lr0.001	0.1532258064516129	0.016571005384325207	0.13265018565185552	0.1738014272513703	0.3839805847676635	0.01729638580030634	0.36250428522038025	0.40545688431494675	0.06425504764175563
e-type_flow_maxabs_lda_100.csv	mlp_128_64	0.14193548387096774	0.016937617206476737	0.12090465437032893	0.16296631337160655	0.3920018512711653	0.045469592250465096	0.3355438955607578	0.44845980698157284	0.06492525592609509
e-type_flow_maxabs_lda_100.csv	mlp_128_64_es	0.3123655913978495	0.07276460160737903	0.222016405238327	0.40271477755737195	0.39224643031748074	0.05036131951426034	0.3297145929745869	0.4547782676603746	0.048302354312805905
e-type_flow_maxabs_lda_100.csv	mlp_128_64_alpha	0.1532258064516129	0.01731733699828646	0.13172349255607851	0.1747281203471473	0.3811797751625021	0.018701004222527542	0.3579594114891331	0.40440013883587117	0.0659348102651621
e-type_ddpm_maxabs_lda_35.csv	logistic_l2_1	0.21403508771929824	0.012301569571907969	0.19876067166046119	0.2293095037781353	0.4738204856273427	0.06898639926270363	0.3881625572971327	0.5594784139575526	0.06922516678252204
e-type_ddpm_maxabs_lda_35.csv	logistic_l2_2	0.21695906432748538	0.006339030230607836	0.2090881187066143	0.22483000994835645	0.4807277893881466	0.03630366428626305	0.43565083644101793	0.5258047423352752	0.06024287011712347
e-type_ddpm_maxabs_lda_35.csv	logistic_l2_3	0.21052631578947367	0.011877249129584736	0.19577876314757128	0.22527386843137606	0.47024486756114064	0.08640634969231785	0.3629572139319845	0.5775325211902969	0.07278026097129418
e-type_ddpm_maxabs_lda_35.csv	logistic_l1_1	0.21637426900584794	0.012576498928424893	0.2007584830629745	0.23199005494872138	0.4748201326723113	0.07558818487693726	0.38096500482104795	0.5686752605235748	0.06971221806084753
e-type_ddpm_maxabs_lda_35.csv	logistic_l1_2	0.24210526315789474	0.018768194778808433	0.2188014713897724	0.2654090549260171	0.4805398819101687	0.07117700778797416	0.3921619538399721	0.5689178099803653	0.056567971360285976
e-type_ddpm_maxabs_lda_35.csv	logistic_l1_3	0.21052631578947367	0.011877249129584736	0.19577876314757128	0.22527386843137606	0.46930777688533815	0.09696572358939569	0.34890892884460784	0.5897066249260685	0.073009288714011
e-type_ddpm_maxabs_lda_35.csv	logistic_l2_balanced_1	0.21403508771929824	0.012301569571907969	0.19876067166046119	0.2293095037781353	0.4738135237782755	0.06898109135566587	0.38816218608514014	0.5594648614714108	0.06922303858020602
e-type_ddpm_maxabs_lda_35.csv	logistic_l1_balanced_1	0.21637426900584794	0.012576498928424893	0.2007584830629745	0.23199005494872138	0.4748201326723113	0.07558818487693726	0.38096500482104795	0.5686752605235748	0.06971207184297305
e-type_ddpm_maxabs_lda_35.csv	rf_100_10	0.1976608187134503	0.014561286079518985	0.1795805940209659	0.21574104340593467	0.45006625680124346	0.049976368224003996	0.388012399616523	0.5121201139859639	0.07285019996955319
e-type_ddpm_maxabs_lda_35.csv	rf_100_20	0.19649122807017544	0.014966647826982137	0.1779076802896171	0.21507477585073378	0.44241268789144783	0.03263899762300254	0.4018860196055073	0.48293935617738837	0.07430329156223893
e-type_ddpm_maxabs_lda_35.csv	rf_200_10	0.19122807017543858	0.01317412903633779	0.17487022844332706	0.2075859119075501	0.4617297174800886	0.05118059672104744	0.39818061312497827	0.5252788218351989	0.07312348465305007
e-type_ddpm_maxabs_lda_35.csv	rf_200_20	0.1935672514619883	0.010420192796026585	0.18062887321281984	0.20650562971115677	0.44443936244512694	0.025696698261620046	0.41253269734096804	0.47634602754928584	0.07448671191868561
e-type_ddpm_maxabs_lda_35.csv	rf_bal_100_10	0.1988304093567251	0.019395466610265494	0.1747477567383952	0.222913061975055	0.4555892653153183	0.02318995820812206	0.4267951290884432	0.4843834015421934	0.07280642156951263
e-type_ddpm_maxabs_lda_35.csv	rf_bal_200_20	0.19590643274853797	0.015746095927293872	0.17635507232335423	0.2154577931737217	0.4363805819586252	0.028200167293609663	0.4013654494868268	0.47139571443042366	0.07408322353398614
e-type_ddpm_maxabs_lda_35.csv	decision_tree	0.21754385964912282	0.009384097389404216	0.20589196376506164	0.229195755533184	0.41301134819689694	0.03525780700055839	0.36923299858868686	0.45678969780510703	0.1117794486215539
e-type_ddpm_maxabs_lda_35.csv	decision_tree_bal	0.21286549707602337	0.014966647826982137	0.19428194929546502	0.23144904485658171	0.3973204644186597	0.04233099607972382	0.34475959057836186	0.44988133825895754	0.11244778613199664
e-type_ddpm_maxabs_lda_35.csv	extra_tree	0.21403508771929824	0.009106673393214875	0.2027276592235432	0.2253425162150533	0.4457746387281378	0.03884636434583105	0.39754050665881296	0.4940087707974626	0.07533378446115288
e-type_ddpm_maxabs_lda_35.csv	extra_tree_bal	0.21228070175438596	0.011805046338120673	0.19762280071921431	0.2269386027895576	0.4462755219754495	0.02485022980318158	0.41541988628174864	0.4771311576691504	0.07516693400167085
e-type_ddpm_maxabs_lda_35.csv	lda	0.22222222222222224	0.018024602347862503	0.1998417224049423	0.24460272203950217	0.4839469256896235	0.058019795436922095	0.41190583451245016	0.5559880168667968	0.06810760648382821
e-type_ddpm_maxabs_lda_35.csv	gaussian_nb	0.20467836257309938	0.018024602347862503	0.18229786275581944	0.2270588623903793	0.4005962160454352	0.12190445803518282	0.24923183928260684	0.5519605928082636	0.07257244100417072
e-type_ddpm_maxabs_lda_35.csv	svm_rbf_1	0.2350877192982456	0.01380785842469894	0.21794299860000235	0.25223243999648887	0.5021772738478881	0.055467682114161254	0.4333050499029231	0.5710494977928531	0.067077276600753
e-type_ddpm_maxabs_lda_35.csv	svm_rbf_2	0.1742690058479532	0.02232585867698371	0.14654779089975736	0.20199022079614906	0.43182757932369614	0.04255728130130552	0.3789857352704348	0.4846694233769575	0.06908109406033802
e-type_ddpm_maxabs_lda_35.csv	svm_rbf_3	0.2485380116959064	0.018142797728056815	0.22601075293028516	0.2710652704615276	0.5155652415039108	0.052752821048367086	0.45006396280446753	0.5810665202033541	0.05937390272796128
e-type_ddpm_maxabs_lda_35.csv	svm_rbf_auto	0.17368421052631577	0.019895936650530993	0.1489801422768086	0.19838827877582293	0.5033504991785083	0.03821451157565436	0.4559009159460772	0.5508000824109394	0.06787713988659579
e-type_ddpm_maxabs_lda_35.csv	svm_rbf_bal	0.2350877192982456	0.01380785842469894	0.21794299860000235	0.25223243999648887	0.5021772738478881	0.055467682114161254	0.4333050499029231	0.5710494977928531	0.06703222553001693
e-type_ddpm_maxabs_lda_35.csv	svm_sigmoid	0.21286549707602337	0.016068575045653902	0.19291372593939948	0.23281726821264725	0.39374454018156485	0.04220955408519129	0.3413344564937481	0.4461546238693816	0.06694411990792856
e-type_ddpm_maxabs_lda_35.csv	svm_sigmoid_bal	0.21286549707602337	0.016068575045653902	0.19291372593939948	0.23281726821264725	0.39374454018156485	0.04220955408519129	0.3413344564937481	0.4461546238693816	0.06743753624008172
e-type_ddpm_maxabs_lda_35.csv	svm_poly_3	0.2818713450292397	0.02094269541458476	0.2558675541076027	0.30787513595087673	0.596973033111524	0.026916755255659838	0.5635514671621092	0.6303945990609389	0.06005270948867132
e-type_ddpm_maxabs_lda_35.csv	svm_poly_4	0.14853801169590644	0.03278245945771687	0.10783321201468482	0.18924281137712806	0.316306841369677	0.1905971913082826	0.07964917076342667	0.5529645119759273	0.067461077387302
e-type_ddpm_maxabs_lda_35.csv	mlp_50_lr0.001	0.20175438596491224	0.012576498928424891	0.1861386000220388	0.21737017190778568	0.4508123778669674	0.03493498143755621	0.40743486913803695	0.4941898865958978	0.07249789619943856
e-type_ddpm_maxabs_lda_35.csv	mlp_100_lr0.001	0.19766081871345026	0.011248762609164529	0.18369363515731	0.21162800226959053	0.4060564357580976	0.11349094385188835	0.2651388166550427	0.5469740548611525	0.07478445104067906
e-type_ddpm_maxabs_lda_35.csv	mlp_50x2_lr0.001	0.195906432748538	0.021286871021288064	0.16947529136699757	0.22233757413007843	0.4614970090725059	0.09794037059996777	0.33988797692779127	0.5831060412172205	0.07753146256637866
e-type_ddpm_maxabs_lda_35.csv	mlp_128_64	0.20467836257309938	0.01906199533684985	0.18100976922940484	0.2283469559167939	0.5070281625439528	0.0700134302877095	0.4200950067649547	0.5939613183229508	0.07843662894034568
e-type_ddpm_maxabs_lda_35.csv	mlp_128_64_es	0.17076023391812867	0.0410712042091658	0.1197635982887325	0.22175686954752483	0.20632313568777186	0.1352560373121874	0.03838058361752342	0.37426568775802027	0.06335999533248896
e-type_ddpm_maxabs_lda_35.csv	mlp_128_64_alpha	0.19707602339181285	0.007339123039772592	0.18796329853493943	0.20618874824868627	0.45394130321750054	0.12431829087865402	0.29957975711525214	0.6083028493197489	0.07877321313520308
e-type_flow_maxabs_lda_1000.csv	mlp_50_lr0.001	0.3994623655913979	0.0077445485434881	0.3898462384826072	0.4090784927001886	0.3560307041024354	0.0300441240700528	0.3187259968870836	0.3933354113177872	0.0453513491923028
e-type_flow_maxabs_lda_1000.csv	mlp_100_lr0.001	0.3989247311827956	0.0180928157746923	0.376459533209227	0.4213899291563642	0.3745359035023227	0.0371848258977425	0.3283648439056206	0.4207069630990247	0.0453758616584297
e-type_flow_maxabs_lda_1000.csv	mlp_50x2_lr0.001	0.3010752688172042	0.0432202558892836	0.2474102330863264	0.3547403045480821	0.3264976078535687	0.0237815818142245	0.2969688738945086	0.3560263418126287	0.0504883463260809
e-type_flow_maxabs_lda_1000.csv	mlp_128_64	0.2693548387096774	0.056751634895921	0.1988883768202077	0.3398213005991472	0.3358755221046236	0.0223200114421885	0.308161567457362	0.3635894767518852	0.0529651102198654
e-type_flow_maxabs_lda_1000.csv	mlp_128_64_es	0.2935483870967742	0.0528962317258014	0.2278690405222026	0.3592277336713458	0.3274349739738568	0.0272235069111421	0.2936325255374401	0.3612374224102734	0.0501794807057369
e-type_flow_maxabs_lda_1000.csv	mlp_128_64_alpha	0.2569892473118279	0.0484467971013712	0.1968346035227726	0.3171438911008831	0.3280997511621579	0.0215630765927396	0.3013256552664426	0.3548738470578731	0.0530835361350326

## Sheet: Feuil2
file	classifier	mean_train_accuracy	mean_train_std	mean_test_accuracy	test_std	test_ci_low	test_ci_high	weighted_precision	prec_std	prec_ci_low	prec_ci_high	brier_score
e-type_flow_maxabs_lda_1000.csv	mlp_50_lr0.001	0.2147647058823529	0.0056617456073016	0.3994623655913979	0.0077445485434881	0.3898462384826072	0.4090784927001886	0.3560307041024354	0.0300441240700528	0.3187259968870836	0.3933354113177872	0.0453513491923028
e-type_flow_maxabs_lda_1000.csv	mlp_100_lr0.001	0.226235294117647	0.0097359605245522	0.3989247311827956	0.0180928157746923	0.376459533209227	0.4213899291563642	0.3745359035023227	0.0371848258977425	0.3283648439056206	0.4207069630990247	0.0453758616584297
e-type_flow_maxabs_lda_1000.csv	mlp_50x2_lr0.001	0.2691764705882353	0.0057255573458323	0.3010752688172042	0.0432202558892836	0.2474102330863264	0.3547403045480821	0.3264976078535687	0.0237815818142245	0.2969688738945086	0.3560263418126287	0.0504883463260809
e-type_flow_maxabs_lda_1000.csv	mlp_128_64	0.2700588235294118	0.005634176482564	0.2693548387096774	0.056751634895921	0.1988883768202077	0.3398213005991472	0.3358755221046236	0.0223200114421885	0.308161567457362	0.3635894767518852	0.0529651102198654
e-type_flow_maxabs_lda_1000.csv	mlp_128_64_es	0.252235294117647	0.0070651932045274	0.2935483870967742	0.0528962317258014	0.2278690405222026	0.3592277336713458	0.3274349739738568	0.0272235069111421	0.2936325255374401	0.3612374224102734	0.0501794807057369
e-type_flow_maxabs_lda_1000.csv	mlp_128_64_alpha	0.2674705882352941	0.0052862686914496	0.2569892473118279	0.0484467971013712	0.1968346035227726	0.3171438911008831	0.3280997511621579	0.0215630765927396	0.3013256552664426	0.3548738470578731	0.0530835361350326
