# Supplementary material for: Synthetic Data Generation for Classifying Electrophysiological and Morpho- Electrophysiological Neurons from Mouse Visual Cortex
Source: Research Square preprint supplement (doi:10.21203/rs.3.rs-7545694/v1), 2025-09-17
Supplement: Supplementary file 8 [file d28fe842a9c09ff15773e734.xlsx]

## Sheet: e-type_without_reducer_filtered
mean_fit_time	mean_score_time	mean_test_score	std_test_score	mean_train_score	std_train_score	params	rank_test_score	scaler	classifier	consistency
0.179447	0.019632	0.729299	0.019337	0.749795	0.00997002	{'classifier__C': 1, 'classifier__gamma': 'auto'}	1	yeo-johnson	svm_sigmoid	-0.0204956
0.18152	0.0189263	0.719858	0.0160859	0.742313	0.00800767	{'classifier__C': 1, 'classifier__gamma': 'scale'}	2	yeo-johnson	svm_sigmoid	-0.0224551
0.408494	0.0297703	0.717849	0.0195454	0.733932	0.00420159	{'classifier__C': 1, 'classifier__gamma': 'auto'}	1	quantile-normal	svm_sigmoid	-0.0160829
0.412268	0.0276863	0.715155	0.0194695	0.738122	0.00390792	{'classifier__C': 1, 'classifier__gamma': 'scale'}	2	quantile-normal	svm_sigmoid	-0.0229666
0.579893	0.0165624	0.709033	0.0342042	0.731462	0.00539271	{'classifier__C': 0.1, 'classifier__penalty': 'l1', 'classifier__solver': 'liblinear'}	6	quantile-normal	logistic_regression	-0.0224293
1.16447	0.00287976	0.697592	0.0253036	0.727048	0.00290986	{'classifier__C': 1, 'classifier__penalty': 'l1', 'classifier__solver': 'liblinear'}	3	maxabs	logistic_regression	-0.0294556
0.0892418	0.0159964	0.692876	0.0251671	0.710138	0.00699532	{'classifier__C': 1, 'classifier__gamma': 'scale'}	1	standard	svm_sigmoid	-0.0172621
0.0876668	0.0155634	0.692876	0.0251671	0.710138	0.00699532	{'classifier__C': 1, 'classifier__gamma': 'auto'}	1	standard	svm_sigmoid	-0.0172621
0.156625	0.0112987	0.690931	0.0218787	0.705723	0.00683495	{'classifier__C': 10, 'classifier__gamma': 'auto'}	3	yeo-johnson	svm_sigmoid	-0.0147926
0.159545	0.0143081	0.678129	0.0216087	0.693453	0.0062877	{'classifier__C': 10, 'classifier__gamma': 'scale'}	4	yeo-johnson	svm_sigmoid	-0.0153237
0.0666344	0.0126689	0.656525	0.0311231	0.67991	0.00592197	{'classifier__C': 10, 'classifier__gamma': 'scale'}	3	standard	svm_sigmoid	-0.0233843
0.0604917	0.00947516	0.656525	0.0311231	0.67991	0.00592197	{'classifier__C': 10, 'classifier__gamma': 'auto'}	3	standard	svm_sigmoid	-0.0233843
0.415342	0.02987	0.655891	0.0165669	0.674372	0.00649319	{'classifier__C': 1, 'classifier__gamma': 'auto'}	4	quantile-uniform	svm_rbf	-0.0184817
0.0916598	0.0121403	0.634337	0.0245069	0.659857	0.00984366	{'classifier__C': 10, 'classifier__gamma': 'auto'}	1	minmax	svm_sigmoid	-0.0255196
0.323996	0.00551813	0.626891	0.0214728	0.652001	0.00374991	{'classifier__alpha': 1}	1	quantile-uniform	multinomial_nb	-0.0251098
0.314212	0.004598	0.626886	0.0202348	0.654844	0.00368396	{'classifier__alpha': 0.1}	2	quantile-uniform	multinomial_nb	-0.0279573
0.601036	0.00692506	0.623581	0.0191553	0.628282	0.003018	{'classifier__C': 0.1, 'classifier__penalty': 'l1', 'classifier__solver': 'liblinear'}	6	quantile-uniform	logistic_regression	-0.0047016
0.100198	0.0134887	0.606049	0.0173006	0.62529	0.0048054	{'classifier__C': 10, 'classifier__gamma': 'scale'}	1	maxabs	svm_sigmoid	-0.0192405
0.307796	0.00407486	0.589883	0.0140547	0.609428	0.00336332	{'classifier__alpha': 10}	3	quantile-uniform	multinomial_nb	-0.0195447
0.105498	0.0152624	0.584514	0.0228482	0.595958	0.00543915	{'classifier__C': 10, 'classifier__gamma': 'auto'}	2	maxabs	svm_sigmoid	-0.0114445
0.425683	0.0177145	0.583185	0.0165765	0.591769	0.0049891	{'classifier__C': 1, 'classifier__gamma': 'auto'}	2	quantile-uniform	svm_sigmoid	-0.0085833
0.464932	0.0279663	0.5825	0.0162063	0.58279	0.00287686	{'classifier__C': 0.1, 'classifier__gamma': 'auto'}	5	quantile-normal	svm_sigmoid	-0.00029
0.231247	0.018168	0.581816	0.012595	0.585783	0.00459755	{'classifier__C': 0.1, 'classifier__gamma': 'scale'}	5	yeo-johnson	svm_sigmoid	-0.0039673
0.450934	0.031726	0.580482	0.0147105	0.581219	0.00308185	{'classifier__C': 0.1, 'classifier__gamma': 'scale'}	6	quantile-normal	svm_sigmoid	-0.0007366
0.0887044	0.0131298	0.577775	0.0220869	0.588477	0.00529992	{'classifier__C': 0.1, 'classifier__gamma': 'scale'}	5	minmax	svm_linear	-0.0107013
0.092674	0.0126024	0.577775	0.0220869	0.588477	0.00529992	{'classifier__C': 0.1, 'classifier__gamma': 'auto'}	5	minmax	svm_linear	-0.0107013
0.241933	0.0176002	0.577109	0.0135487	0.580546	0.0034547	{'classifier__C': 0.1, 'classifier__gamma': 'auto'}	6	yeo-johnson	svm_sigmoid	-0.0034369
0.146799	0.0171423	0.572406	0.0205349	0.579124	0.00414504	{'classifier__C': 0.1, 'classifier__gamma': 'scale'}	5	standard	svm_sigmoid	-0.0067181
0.144636	0.020975	0.572406	0.0205349	0.579124	0.00414504	{'classifier__C': 0.1, 'classifier__gamma': 'auto'}	5	standard	svm_sigmoid	-0.0067181
0.0962282	0.0135444	0.570356	0.0234712	0.585109	0.00560714	{'classifier__C': 1, 'classifier__gamma': 'scale'}	2	maxabs	svm_poly	-0.0147526
0.240118	0.0361831	0.557578	0.0196768	0.576356	0.00295474	{'classifier__C': 0.1, 'classifier__gamma': 'auto'}	5	yeo-johnson	svm_rbf	-0.0187782
0.436215	0.0351052	0.553564	0.0214853	0.571343	0.00208642	{'classifier__C': 0.1, 'classifier__gamma': 'scale'}	5	quantile-uniform	svm_rbf	-0.0177787
0.250294	0.0384525	0.553533	0.0206835	0.574111	0.00325924	{'classifier__C': 0.1, 'classifier__gamma': 'scale'}	6	yeo-johnson	svm_rbf	-0.0205788
0.0873647	0.0106975	0.549542	0.0274005	0.562813	0.00426662	{'classifier__C': 10, 'classifier__gamma': 'scale'}	1	normalizer	svm_linear	-0.0132713
0.076015	0.0104331	0.549542	0.0274005	0.562813	0.00426662	{'classifier__C': 10, 'classifier__gamma': 'auto'}	1	normalizer	svm_linear	-0.0132713
0.450222	0.0501022	0.544123	0.0204721	0.56663	0.00278802	{'classifier__C': 0.1, 'classifier__gamma': 'scale'}	5	quantile-normal	svm_rbf	-0.0225065
0.472827	0.0483167	0.542772	0.0202164	0.565133	0.00291409	{'classifier__C': 0.1, 'classifier__gamma': 'auto'}	6	quantile-normal	svm_rbf	-0.0223614
0.13381	0.0313258	0.540767	0.0214848	0.556005	0.0028505	{'classifier__C': 0.1, 'classifier__gamma': 'scale'}	5	standard	svm_rbf	-0.0152373
0.138056	0.0309865	0.540767	0.0214848	0.556005	0.0028505	{'classifier__C': 0.1, 'classifier__gamma': 'auto'}	5	standard	svm_rbf	-0.0152373
0.144677	0.0373796	0.540763	0.0165583	0.54957	0.00458358	{'classifier__C': 1, 'classifier__gamma': 'scale'}	3	maxabs	svm_rbf	-0.0088069
0.101299	0.0109226	0.532015	0.0187733	0.538271	0.00423933	{'classifier__C': 0.1, 'classifier__gamma': 'scale'}	5	maxabs	svm_linear	-0.0062557
0.0962621	0.0139106	0.532015	0.0187733	0.538271	0.00423933	{'classifier__C': 0.1, 'classifier__gamma': 'auto'}	5	maxabs	svm_linear	-0.0062557
0.0971941	0.012943	0.511142	0.026192	0.518744	0.0039279	{'classifier__C': 1, 'classifier__gamma': 'scale'}	2	normalizer	svm_poly	-0.0076018
0.124791	0.0334448	0.501025	0.014904	0.509391	0.00512183	{'classifier__C': 0.1, 'classifier__gamma': 'scale'}	4	minmax	svm_rbf	-0.0083661
0.140151	0.00266442	0.499683	0.0328563	0.506547	0.00513192	{'classifier__C': 10, 'classifier__penalty': 'l2', 'classifier__solver': 'liblinear'}	2	normalizer	logistic_regression	-0.0068645
0.132072	0.012106	0.499492	0.146756	0.510832	0.14996	{'classifier__C': 1, 'classifier__gamma': 'scale'}	1	robust	svm_sigmoid	-0.0113402
0.107712	0.0115792	0.494953	0.0139283	0.50116	0.00632754	{'classifier__C': 10, 'classifier__gamma': 'auto'}	3	maxabs	svm_poly	-0.0062071
0.0896689	0.00228205	0.493611	0.0222084	0.506471	0.0037325	{'classifier__C': 0.1, 'classifier__penalty': 'l2', 'classifier__solver': 'liblinear'}	5	minmax	logistic_regression	-0.0128607
0.115849	0.0285737	0.491602	0.0274312	0.497568	0.00519774	{'classifier__C': 1, 'classifier__gamma': 'scale'}	2	normalizer	svm_rbf	-0.0059668
0.216794	0.0382414	0.480161	0.00975431	0.485522	0.00650923	{'classifier__C': 1, 'classifier__gamma': 'auto'}	5	minmax	svm_rbf	-0.0053616
0.254475	0.00296421	0.474098	0.0318298	0.484773	0.00546202	{'classifier__C': 1, 'classifier__penalty': 'l1', 'classifier__solver': 'liblinear'}	3	normalizer	logistic_regression	-0.0106758
0.140981	0.00382862	0.471372	0.0174833	0.473251	0.00367236	{'classifier__C': 0.1, 'classifier__penalty': 'l1', 'classifier__solver': 'liblinear'}	6	minmax	logistic_regression	-0.0018785
0.00968382	0.00165463	0.468003	0.0190133	0.473251	0.00423922	{'classifier__alpha': 0.1}	1	minmax	multinomial_nb	-0.0052478
0.102458	0.0127701	0.466026	0.0323249	0.472877	0.0058085	{'classifier__C': 10, 'classifier__gamma': 'scale'}	1	normalizer	svm_sigmoid	-0.0068509
0.0974265	0.0138722	0.465327	0.0250204	0.468987	0.00370144	{'classifier__C': 1, 'classifier__gamma': 'scale'}	3	normalizer	svm_linear	-0.0036591
0.0945294	0.0142212	0.465327	0.0250204	0.468987	0.00370144	{'classifier__C': 1, 'classifier__gamma': 'auto'}	3	normalizer	svm_linear	-0.0036591
0.00804365	0.00127437	0.465305	0.0155134	0.469211	0.00355	{'classifier__alpha': 1}	2	minmax	multinomial_nb	-0.0039059
0.162318	0.0191481	0.463237	0.053922	0.461735	0.0505358	{'classifier__C': 0.1, 'classifier__gamma': 'auto'}	2	robust	svm_sigmoid	0.0015018
0.0880802	0.0031543	0.461985	0.0237058	0.462552	0.00325845	{'classifier__C': 0.1, 'classifier__penalty': 'l2', 'classifier__solver': 'liblinear'}	5	maxabs	logistic_regression	-0.0005665
0.126313	0.0310452	0.461287	0.0242265	0.463524	0.00318457	{'classifier__C': 10, 'classifier__gamma': 'auto'}	3	normalizer	svm_rbf	-0.0022375
0.128754	0.0146598	0.460616	0.0246388	0.461654	0.00384862	{'classifier__C': 1, 'classifier__gamma': 'scale'}	2	normalizer	svm_sigmoid	-0.0010378
0.286283	0.00273216	0.458607	0.0165948	0.460457	0.00369753	{'classifier__C': 0.1, 'classifier__penalty': 'l1', 'classifier__solver': 'liblinear'}	6	maxabs	logistic_regression	-0.00185
0.113463	0.0169363	0.457201	0.0698816	0.447745	0.0635335	{'classifier__C': 1, 'classifier__gamma': 'auto'}	4	robust	svm_sigmoid	0.00945658
0.0923826	0.00275502	0.455233	0.0234093	0.456641	0.00276846	{'classifier__C': 1, 'classifier__penalty': 'l2', 'classifier__solver': 'liblinear'}	4	normalizer	logistic_regression	-0.0014076
0.0965581	0.0138893	0.444427	0.0258886	0.445342	0.00397243	{'classifier__C': 0.1, 'classifier__gamma': 'scale'}	3	normalizer	svm_poly	-0.0009157
0.44185	0.019639	0.4424	0.027348	0.444819	0.0057304	{'classifier__C': 10, 'classifier__gamma': 'scale'}	3	quantile-uniform	svm_sigmoid	-0.0024192
0.220393	0.0314912	0.439715	0.0219813	0.445569	0.0160586	{'classifier__C': 0.1, 'classifier__gamma': 'auto'}	5	robust	svm_rbf	-0.005854
0.0984832	0.0143036	0.437711	0.063141	0.440711	0.0567965	{'classifier__C': 10, 'classifier__gamma': 'auto'}	5	robust	svm_sigmoid	-0.0030006
0.111809	0.0123598	0.435679	0.0210218	0.437112	0.00340956	{'classifier__C': 10, 'classifier__gamma': 'auto'}	3	normalizer	svm_sigmoid	-0.0014328
0.167955	0.0512505	0.43299	0.00808954	0.434044	0.00297722	{'classifier__C': 1, 'classifier__gamma': 'auto'}	4	maxabs	svm_rbf	-0.0010538
0.120539	0.0332019	0.432319	0.020894	0.431949	0.00290438	{'classifier__C': 0.1, 'classifier__gamma': 'scale'}	4	normalizer	svm_rbf	0.00037013
0.00872869	0.00137482	0.426923	0.00890757	0.430153	0.00282245	{'classifier__alpha': 10}	3	minmax	multinomial_nb	-0.0032301
0.12568	0.0172317	0.421517	0.0240762	0.426638	0.00796756	{'classifier__C': 10, 'classifier__gamma': 'scale'}	2	minmax	svm_sigmoid	-0.0051207
0.0721014	0.00211155	0.420873	0.0167172	0.420052	0.00272825	{'classifier__C': 0.1, 'classifier__penalty': 'l1', 'classifier__solver': 'liblinear'}	5	normalizer	logistic_regression	0.00082135
0.108706	0.0144483	0.419531	0.0180826	0.420875	0.00375303	{'classifier__C': 0.1, 'classifier__gamma': 'scale'}	5	normalizer	svm_linear	-0.0013443
0.107349	0.012881	0.419531	0.0180826	0.420875	0.00375303	{'classifier__C': 0.1, 'classifier__gamma': 'auto'}	5	normalizer	svm_linear	-0.0013443
0.130611	0.0141787	0.414806	0.0100582	0.418556	0.00202368	{'classifier__C': 1, 'classifier__gamma': 'auto'}	3	minmax	svm_sigmoid	-0.00375
0.138646	0.033409	0.412085	0.0303302	0.421405	0.0362937	{'classifier__C': 0.1, 'classifier__gamma': 'scale'}	6	robust	svm_rbf	-0.0093198
0.0743715	0.0034184	0.411446	0.0165236	0.41242	0.00232222	{'classifier__C': 0.1, 'classifier__penalty': 'l2', 'classifier__solver': 'liblinear'}	6	normalizer	logistic_regression	-0.0009748
0.113024	0.0121945	0.405383	0.0124777	0.407781	0.00295754	{'classifier__C': 10, 'classifier__gamma': 'auto'}	4	minmax	svm_poly	-0.0023983
0.455217	0.0140884	0.403333	0.0204572	0.42013	0.0285847	{'classifier__C': 0.1, 'classifier__gamma': 'scale'}	6	robust	svm_poly	-0.0167972
0.156331	0.0145683	0.401968	0.0403133	0.410406	0.0430283	{'classifier__C': 0.1, 'classifier__gamma': 'scale'}	6	robust	svm_sigmoid	-0.0084376
0.431371	0.0136401	0.391915	0.0074907	0.394164	0.00268081	{'classifier__C': 1, 'classifier__gamma': 'auto'}	5	quantile-uniform	svm_poly	-0.0022492
0.124934	0.0147209	0.388563	0.00894611	0.38945	0.0028804	{'classifier__C': 0.1, 'classifier__gamma': 'scale'}	4	normalizer	svm_sigmoid	-0.0008865
0.134845	0.0135202	0.38519	0.00738034	0.385934	0.00167837	{'classifier__C': 1, 'classifier__gamma': 'scale'}	3	maxabs	svm_sigmoid	-0.0007441
0.132172	0.0317078	0.379807	0.00501064	0.38092	0.00240922	{'classifier__C': 1, 'classifier__gamma': 'auto'}	5	normalizer	svm_rbf	-0.0011136
0.132558	0.0160002	0.379802	0.00463978	0.378751	0.000930522	{'classifier__C': 1, 'classifier__gamma': 'auto'}	4	maxabs	svm_sigmoid	0.00105165
0.0935997	0.0143671	0.379798	0.00602762	0.379499	0.0012339	{'classifier__C': 0.1, 'classifier__gamma': 'scale'}	4	maxabs	svm_poly	0.00029906
0.125309	0.0313981	0.376433	0.0020013	0.376431	0.000221608	{'classifier__C': 0.1, 'classifier__gamma': 'auto'}	6	minmax	svm_rbf	1.9755e-06
0.143185	0.0177742	0.376433	0.0020013	0.376431	0.000221608	{'classifier__C': 0.1, 'classifier__gamma': 'scale'}	4	minmax	svm_sigmoid	1.9755e-06
0.133046	0.0139985	0.376433	0.0020013	0.376431	0.000221608	{'classifier__C': 0.1, 'classifier__gamma': 'auto'}	4	minmax	svm_sigmoid	1.9755e-06
0.141496	0.0146036	0.376433	0.0020013	0.37673	0.000688755	{'classifier__C': 1, 'classifier__gamma': 'scale'}	4	minmax	svm_sigmoid	-0.0002973
0.109677	0.0126663	0.376433	0.0020013	0.376431	0.000221608	{'classifier__C': 0.1, 'classifier__gamma': 'auto'}	5	minmax	svm_poly	1.9755e-06
0.109976	0.0138368	0.376433	0.0020013	0.376431	0.000221608	{'classifier__C': 1, 'classifier__gamma': 'auto'}	5	minmax	svm_poly	1.9755e-06
0.137306	0.0361263	0.376433	0.0020013	0.376431	0.000221608	{'classifier__C': 0.1, 'classifier__gamma': 'scale'}	5	maxabs	svm_rbf	1.9755e-06
0.137478	0.0350533	0.376433	0.0020013	0.376431	0.000221608	{'classifier__C': 0.1, 'classifier__gamma': 'auto'}	5	maxabs	svm_rbf	1.9755e-06
0.130463	0.0160752	0.376433	0.0020013	0.376431	0.000221608	{'classifier__C': 0.1, 'classifier__gamma': 'scale'}	5	maxabs	svm_sigmoid	1.9755e-06
0.128413	0.0199158	0.376433	0.0020013	0.376431	0.000221608	{'classifier__C': 0.1, 'classifier__gamma': 'auto'}	5	maxabs	svm_sigmoid	1.9755e-06
0.116827	0.0171805	0.376433	0.0020013	0.376431	0.000221608	{'classifier__C': 0.1, 'classifier__gamma': 'auto'}	5	maxabs	svm_poly	1.9755e-06
0.113662	0.0141254	0.376433	0.0020013	0.376431	0.000221608	{'classifier__C': 1, 'classifier__gamma': 'auto'}	5	maxabs	svm_poly	1.9755e-06
0.130285	0.029277	0.376433	0.0020013	0.376431	0.000221608	{'classifier__C': 0.1, 'classifier__gamma': 'auto'}	6	normalizer	svm_rbf	1.9755e-06
0.114994	0.0124204	0.376433	0.0020013	0.376431	0.000221608	{'classifier__C': 0.1, 'classifier__gamma': 'auto'}	5	normalizer	svm_sigmoid	1.9755e-06
0.116356	0.0150079	0.376433	0.0020013	0.376431	0.000221608	{'classifier__C': 1, 'classifier__gamma': 'auto'}	5	normalizer	svm_sigmoid	1.9755e-06
0.104501	0.0115843	0.376433	0.0020013	0.376431	0.000221608	{'classifier__C': 0.1, 'classifier__gamma': 'auto'}	4	normalizer	svm_poly	1.9755e-06
0.109247	0.0129589	0.376433	0.0020013	0.376431	0.000221608	{'classifier__C': 1, 'classifier__gamma': 'auto'}	4	normalizer	svm_poly	1.9755e-06
0.0990427	0.0133893	0.376433	0.0020013	0.376431	0.000221608	{'classifier__C': 10, 'classifier__gamma': 'auto'}	4	normalizer	svm_poly	1.9755e-06
0.435812	0.0323396	0.376433	0.0020013	0.376431	0.000221608	{'classifier__C': 0.1, 'classifier__gamma': 'auto'}	6	quantile-uniform	svm_rbf	1.9755e-06
0.461546	0.0188442	0.376433	0.0020013	0.376431	0.000221608	{'classifier__C': 0.1, 'classifier__gamma': 'scale'}	4	quantile-uniform	svm_sigmoid	1.9755e-06
0.453372	0.0161967	0.376433	0.0020013	0.376431	0.000221608	{'classifier__C': 0.1, 'classifier__gamma': 'auto'}	4	quantile-uniform	svm_sigmoid	1.9755e-06
0.473074	0.0181326	0.376433	0.0020013	0.376581	0.00034105	{'classifier__C': 1, 'classifier__gamma': 'scale'}	4	quantile-uniform	svm_sigmoid	-0.0001477
0.428121	0.0176592	0.376433	0.0020013	0.376431	0.000221608	{'classifier__C': 0.1, 'classifier__gamma': 'auto'}	6	quantile-uniform	svm_poly	1.9755e-06
