# Supplementary material for: Synthetic Data Generation for Classifying Electrophysiological and Morpho- Electrophysiological Neurons from Mouse Visual Cortex
Source: Research Square preprint supplement (doi:10.21203/rs.3.rs-7545694/v1), 2025-09-17
Supplement: Supplementary file 9 [file fc86005c55191305866197ab.xlsx]

## Sheet: Feuil1
file	classifier	mean_test_accuracy	test_std	test_ci_low	test_ci_high	weighted_precision	prec_std	prec_ci_low	prec_ci_high	brier_score
e-type_smote_yeo_5000.csv	rf_200_20	0.7940860215053762	0.0101654141941876	0.7814639926736239	0.8067080503371286	0.8138230193660216	0.0063960522391519	0.8058812715700361	0.8217647671620072	0.0193740337666395
e-type_smote_yeo_5000.csv	rf_bal_200_20	0.7897849462365591	0.0044171173992352	0.7843003705860894	0.7952695218870289	0.8108714723733975	0.0048576019062496	0.8048399629688013	0.8169029817779937	0.0195685526189668
e-type_smote_yeo_10000.csv	rf_bal_200_20	0.786021505376344	0.0052402120133381	0.7795149227764271	0.7925280879762608	0.8048033518572755	0.0036647543991508	0.800252958257591	0.8093537454569599	0.0193040611084627
e-type_flow_yeo_1000.csv	SVM_rbf_4	0.7849462365591398	0.009876974769286999	0.7726823525769492	0.7972101205413303	0.7940729814091236	0.011763422250228524	0.7794667635053457	0.8086791993129016	nan
e-type_flow_yeo_1000.csv	SVM_rbf_4	0.7849462365591398	0.0098769747692869	0.7726823525769492	0.7972101205413303	0.7940729814091236	0.0117634222502285	0.7794667635053457	0.8086791993129016
e-type_smote_yeo_2000.csv	rf_200_20	0.7849462365591398	0.0078373009339318	0.7752149421463879	0.7946775309718916	0.8112890172858751	0.010180097190341	0.7986487571064133	0.823929277465337	0.019842820864551
e-type_smote_yeo_10000.csv	rf_200_20	0.7849462365591398	0.0068535208516031	0.7764364664567652	0.7934560066615143	0.8047149167610474	0.0058041598221699	0.7975081004700383	0.8119217330520566	0.0193261417077968
e-type_flow_yeo_1000.csv	xgboost	0.7844086021505376	0.008793240448277478	0.7734903520583624	0.7953268522427129	0.7962964061653498	0.004484451759456361	0.7907282238639513	0.8018645884667484	0.018578900812595448
e-type_flow_yeo_1000.csv	xgboost	0.7844086021505376	0.0087932404482774	0.7734903520583624	0.7953268522427129	0.7962964061653498	0.0044844517594563	0.7907282238639513	0.8018645884667484
e-type_flow_yeo_1000.csv	svm_rbf_auto	0.7844086021505376	0.0109853853450013	0.7707684446612542	0.7980487596398211	0.7956346002035767	0.0096178460471668	0.7836924670265433	0.8075767333806101	0.0184508480619642
e-type_smote_yeo_10000.csv	rf_100_20	0.7838709677419354	0.009036417373103	0.7726507736170104	0.7950911618668605	0.8028324545179887	0.0107914726647418	0.7894330714225787	0.8162318376133987	0.0194000983185077
e-type_smote_yeo_1000.csv	rf_bal_200_20	0.7817204301075268	0.0044171173992352	0.776235854457057	0.7872050057579966	0.8090637725341813	0.0042324254516373	0.8038085222258018	0.8143190228425607	0.0205261077589872
e-type_smote_yeo_1000.csv	rf_200_20	0.7811827956989247	0.0084153095927411	0.7707338087438792	0.7916317826539702	0.8092177509996438	0.0111800827015962	0.795335844812131	0.8230996571871565	0.0205315630425644
e-type_flow_yeo_10000.csv	svm_rbf_auto	0.7806451612903225	0.0058894898656469	0.7733323937563628	0.7879579288242822	0.7932583920162889	0.0090228083189134	0.7820550957640007	0.8044616882685771	0.0183746150768594
e-type_smote_yeo_2000.csv	rf_bal_200_20	0.7795698924731183	0.004250373199151	0.7742923570928022	0.7848474278534343	0.8056357050259255	0.0082219618229689	0.7954267910357391	0.8158446190161119	0.0199193530402702
e-type_smote_yeo_2000.csv	rf_100_20	0.7790322580645161	0.0051708021671159	0.7726118591717742	0.7854526569572581	0.800843296579392	0.0055072223667439	0.7940051768365035	0.8076814163222805	0.0200384437424521
e-type_smote_yeo_10000.csv	rf_200_10	0.7790322580645161	0.0101298084308692	0.7664544396272048	0.7916100765018275	0.8191209630990025	0.0090008532468643	0.8079449276692556	0.8302969985287494	0.02145809275042
e-type_flow_yeo_10000.csv	SVM_rbf_4	0.778494623655914	0.0067472582785006036	0.7701167959649176	0.7868724513469105	0.7895589119098536	0.012068758193363088	0.7745735693581279	0.8045442544615793	nan
e-type_flow_yeo_10000.csv	SVM_rbf_4	0.778494623655914	0.0067472582785006	0.7701167959649176	0.7868724513469105	0.7895589119098536	0.012068758193363	0.7745735693581279	0.8045442544615793
e-type_smote_yeo_1000.csv	SVM_rbf_2	0.7779569892473118	0.004498172185667069	0.7723717707866474	0.7835422077079762	0.7953995330094212	0.0064803697652085586	0.7873530911769135	0.8034459748419289	nan
e-type_smote_yeo_1000.csv	SVM_rbf_2	0.7779569892473118	0.004498172185667	0.7723717707866474	0.7835422077079762	0.7953995330094212	0.0064803697652085	0.7873530911769135	0.8034459748419289
e-type_flow_yeo_1000.csv	rf_100_20	0.7779569892473118	0.0061886367920544	0.7702727817446585	0.7856411967499651	0.7945043821382772	0.0067315495014654	0.786146059470181	0.8028627048063735	0.0215962472436751
e-type_smote_yeo_1000.csv	SVM_rbf_1	0.7774193548387096	0.004808748338709221	0.7714485051501122	0.783390204527307	0.7991700108992781	0.006886479580116193	0.7906193171302824	0.8077207046682737	nan
e-type_smote_yeo_1000.csv	SVM_rbf_1	0.7774193548387096	0.0048087483387092	0.7714485051501122	0.783390204527307	0.7991700108992781	0.0068864795801161	0.7906193171302824	0.8077207046682737
e-type_smote_yeo_1000.csv	rf_200_10	0.7768817204301076	0.0065846498461913	0.7687057977753139	0.7850576430849013	0.8252812902742985	0.009225179566065	0.8138267169301505	0.8367358636184465	0.022097213631955
e-type_flow_yeo_10000.csv	rf_100_20	0.7763440860215052	0.0134945165570012	0.7595884306395121	0.7930997414034983	0.7947453445734283	0.0182459659722947	0.7720899855131789	0.8174007036336777	0.0229144980975832
e-type_flow_yeo_1000.csv	rf_200_20	0.7758064516129032	0.0077445485434881	0.7661903245041125	0.7854225787216939	0.7924794341550581	0.0090950108962385	0.7811864865619277	0.8037723817481884	0.0215476564267971
e-type_flow_yeo_1000.csv	rf_100_10	0.7758064516129031	0.0121116992753427	0.7607677906656393	0.7908451125601669	0.792368955622013	0.0129890261127072	0.7762409495261359	0.8084969617178902	0.0219862298400501
e-type_smote_yeo_5000.csv	rf_200_10	0.775268817204301	0.0088342347984704	0.7642996659033613	0.7862379685052406	0.8202886298925272	0.0061059551802036	0.8127070851706225	0.8278701746144318	0.0214405465245646
e-type_smote_yeo_1000.csv	xgboost	0.7741935483870968	0.006853520851603199	0.7656837782847222	0.7827033184894713	0.8004184544556215	0.002005385735800344	0.7979284391849669	0.8029084697262762	0.020146141187575673
e-type_smote_yeo_1000.csv	xgboost	0.7741935483870968	0.0068535208516031	0.7656837782847222	0.7827033184894713	0.8004184544556215	0.0020053857358003	0.7979284391849669	0.8029084697262762
e-type_smote_yeo_5000.csv	rf_100_20	0.7741935483870968	0.0073618623320586	0.7650525889696471	0.7833345078045464	0.7925892260380438	0.0082554298120509	0.7823387560507221	0.8028396960253655	0.0196334532623779
e-type_flow_yeo_1000.csv	rf_200_10	0.7736559139784946	0.0051708021671159	0.7672355150857527	0.7800763128712366	0.7909336827142577	0.0051322374003433	0.7845611683040165	0.7973061971244989	0.021764026167557
e-type_flow_yeo_10000.csv	rf_200_20	0.7731182795698924	0.009036417373103	0.7618980854449674	0.7843384736948175	0.7853559514803108	0.0085491285551023	0.7747408063374244	0.7959710966231972	0.0228934765052251
e-type_smote_yeo_10000.csv	rf_bal_100_10	0.7725806451612904	0.0133869888150416	0.7559585031052968	0.7892027872172841	0.8115126654813078	0.0103196272053646	0.7986991559055224	0.8243261750570933	0.0215873488762998
e-type_smote_yeo_2000.csv	rf_200_10	0.7725806451612903	0.0094277838262097	0.7608745054014379	0.7842867849211428	0.8185205211037822	0.0097029047297073	0.8064727736229035	0.8305682685846608	0.0217093858358861
e-type_flow_yeo_1000.csv	SVM_rbf_5	0.7720430107526882	0.013890334067487959	0.7547958830180651	0.7892901384873113	0.7784032725470975	0.016521105681755004	0.7578896104115427	0.7989169346826523	nan
e-type_flow_yeo_1000.csv	SVM_rbf_5	0.7720430107526882	0.0138903340674879	0.7547958830180651	0.7892901384873113	0.7784032725470975	0.016521105681755	0.7578896104115427	0.7989169346826523
e-type_smote_yeo_5000.csv	extra_tree	0.7720430107526882	0.0022490860928335	0.769250401522356	0.7748356199830204	0.7868256044268398	0.0027913984711826	0.7833596254405313	0.7902915834131483	0.0206749525616698
e-type_smote_yeo_10000.csv	rf_100_10	0.7720430107526881	0.0048087483387092	0.7660721610640907	0.7780138604412855	0.8097224623294241	0.0091895854006876	0.7983120849789713	0.8211328396798769	0.0214538083156145
e-type_smote_yeo_2000.csv	extra_tree_bal	0.771505376344086	0.0091160349235554	0.760186323973139	0.782824428715033	0.7890780898329439	0.0059124457585047	0.7817368187932761	0.7964193608726118	0.0213770524984187
e-type_smote_yeo_2000.csv	extra_tree	0.7709677419354838	0.0122304442645992	0.7557816396100931	0.7861538442608744	0.7889881885862897	0.013663770037574	0.7720223772508986	0.8059539999216808	0.0212444655281467
e-type_smote_yeo_1000.csv	extra_tree_bal	0.7704301075268817	0.009036417373103	0.7592099134019566	0.7816503016518067	0.7915543359458221	0.0086899655719767	0.7807643185494685	0.8023443533421758	0.0218403352308665
e-type_smote_yeo_5000.csv	rf_bal_100_10	0.7704301075268817	0.0067472582785006	0.7620522798358852	0.7788079352178782	0.8129135701567257	0.0037817694145469	0.8082178832251746	0.8176092570882768	0.0214934413049168
e-type_flow_yeo_10000.csv	rf_bal_200_20	0.7693548387096774	0.0091949631056382	0.7579377840565945	0.7807718933627602	0.783062373856456	0.0130962815128163	0.7668011925916505	0.7993235551212616	0.0228776204829158
e-type_smote_yeo_2000.csv	rf_100_10	0.7693548387096774	0.0089963443713341	0.7581844017883487	0.780525275631006	0.8125301777872529	0.0074477774823864	0.803282540620741	0.8217778149537648	0.02189142592233
e-type_smote_yeo_1000.csv	extra_tree	0.7688172043010753	0.004250373199151	0.7635396689207592	0.7740947396813913	0.7872792355054055	0.0024384089626222	0.7842515508836201	0.7903069201271908	0.0216964642631246
e-type_smote_yeo_10000.csv	extra_tree	0.7688172043010753	0.0019008246806089	0.7664570187282659	0.7711773898738846	0.7813869703494324	0.0017207017387896	0.7792504369487306	0.7835235037501341	0.0203577103099304
e-type_flow_yeo_1000.csv	random_forest_5	0.768279569892473	0.010480424026676297	0.7552664046926393	0.7812927350923068	0.7752319065504001	0.009092923642698533	0.7639415506248455	0.7865222624759547	nan
e-type_flow_yeo_1000.csv	random_forest_5	0.768279569892473	0.0104804240266762	0.7552664046926393	0.7812927350923068	0.7752319065504001	0.0090929236426985	0.7639415506248455	0.7865222624759547
e-type_smote_yeo_5000.csv	rf_100_10	0.768279569892473	0.0087932404482774	0.7573613198002977	0.7791978199846483	0.8093085593129903	0.007577152715151	0.7999002815776953	0.8187168370482852	0.0215848359283804
e-type_flow_yeo_1000.csv	rf_bal_200_20	0.767741935483871	0.0061886367920544	0.7600577279812177	0.7754261429865243	0.7830633168406484	0.0109048536728071	0.7695231526294437	0.7966034810518532	0.0214045999692022
e-type_smote_yeo_1000.csv	rf_100_20	0.7677419354838709	0.0075076559375101	0.7584199493953638	0.777063921572378	0.7975373371199606	0.0079688632719343	0.7876426864885915	0.8074319877513296	0.020813848118874
e-type_smote_yeo_1000.csv	rf_bal_100_10	0.7672043010752689	0.0048833070227378	0.7611408745529596	0.7732677275975782	0.8136522572709858	0.0049250810273731	0.8075369614710601	0.8197675530709114	0.0222612705772816
e-type_smote_yeo_2000.csv	rf_bal_100_10	0.7661290322580646	0.0071122347071628	0.7572980264754051	0.7749600380407241	0.8095998358053678	0.0048543328624146	0.80357238545481	0.8156272861559255	0.0219003089714815
e-type_smote_yeo_1000.csv	rf_100_10	0.7661290322580644	0.0126086445156543	0.750473332296827	0.7817847322193018	0.8086177808523439	0.0143946174023094	0.7907445026559788	0.826491059048709	0.0222637151033709
e-type_smote_yeo_1000.csv	SVM_rbf_4	0.7650537634408602	0.0014723724664117354	0.7632255715573703	0.7668819553243501	0.7938382175786253	0.003550794546523596	0.7894293238251886	0.7982471113320619	nan
e-type_smote_yeo_1000.csv	SVM_rbf_4	0.7650537634408602	0.0014723724664117	0.7632255715573703	0.7668819553243501	0.7938382175786253	0.0035507945465235	0.7894293238251886	0.7982471113320619
e-type_smote_yeo_5000.csv	extra_tree_bal	0.7650537634408602	0.0055743121917547	0.7581323406776099	0.7719751862041104	0.7821102788481793	0.0087150689024219	0.7712890915501767	0.7929314661461819	0.0206819671094244
e-type_smote_yeo_10000.csv	extra_tree_bal	0.7650537634408602	0.0099861159252724	0.7526543628145601	0.7774531640671603	0.7770530814024497	0.0126783247374359	0.7613108620184392	0.7927953007864601	0.0202931815306767
e-type_flow_yeo_1000.csv	random_forest_2	0.764516129032258	0.007744548543488129	0.7549000019234673	0.7741322561410486	0.770283308862569	0.00883026577747234	0.7593190857521108	0.7812475319730272	nan
e-type_smote_yeo_1000.csv	random_forest_2	0.764516129032258	0.0067472582785006036	0.7561383013412615	0.7728939567232544	0.7818944722765817	0.011120096476276594	0.7680870488254365	0.7957018957277269	nan
e-type_flow_yeo_1000.csv	random_forest_2	0.764516129032258	0.0077445485434881	0.7549000019234673	0.7741322561410486	0.770283308862569	0.0088302657774723	0.7593190857521108	0.7812475319730272
e-type_smote_yeo_1000.csv	random_forest_2	0.764516129032258	0.0067472582785006	0.7561383013412615	0.7728939567232544	0.7818944722765817	0.0111200964762765	0.7680870488254365	0.7957018957277269
e-type_gan_yeo_10000.csv	SVM_rbf_5	0.7634408602150538	0.010058218781650372	0.7509519320678215	0.775929788362286	0.7795592083465859	0.011519238918512559	0.7652561840947611	0.7938622325984106	nan
e-type_smote_yeo_1000.csv	random_forest_4	0.7634408602150538	0.013838212555090042	0.7462584498859071	0.7806232705442004	0.7782218802523255	0.013597199061385047	0.7613387277013937	0.7951050328032574	nan
e-type_gan_yeo_10000.csv	SVM_rbf_5	0.7634408602150538	0.0100582187816503	0.7509519320678215	0.775929788362286	0.7795592083465859	0.0115192389185125	0.7652561840947611	0.7938622325984106
e-type_smote_yeo_1000.csv	random_forest_4	0.7634408602150538	0.01383821255509	0.7462584498859071	0.7806232705442004	0.7782218802523255	0.013597199061385	0.7613387277013937	0.7951050328032574
e-type_smote_yeo_2000.csv	svm_rbf_auto	0.7634408602150538	0.004250373199151	0.7581633248347377	0.7687183955953698	0.7892441629744964	0.0048818783290106	0.7831825104097526	0.7953058155392402	0.0209990304914439
e-type_smote_yeo_10000.csv	svm_rbf_2	0.7634408602150538	0.0	0.7634408602150538	0.7634408602150538	0.7810222334415882	0.0	0.7810222334415882	0.7810222334415882	0.0227103268769686
e-type_smote_yeo_10000.csv	svm_rbf_auto	0.7634408602150538	0.0019008246806089	0.7610806746422444	0.7658010457878631	0.7829215089526816	0.0014840120505342	0.7810788646166328	0.7847641532887305	0.0221046779143806
e-type_flow_yeo_1000.csv	random_forest_1	0.7634408602150536	0.0068535208516031995	0.7549310901126791	0.7719506303174282	0.7654235584082307	0.009221033828896179	0.7539741326766713	0.7768729841397901	nan
e-type_smote_yeo_1000.csv	SVM_rbf_5	0.7634408602150536	0.004250373199151044	0.7581633248347376	0.7687183955953697	0.7859934075393322	0.004531021046169922	0.7803674018311995	0.791619413247465	nan
e-type_flow_yeo_1000.csv	random_forest_1	0.7634408602150536	0.0068535208516031	0.7549310901126791	0.7719506303174282	0.7654235584082307	0.0092210338288961	0.7539741326766713	0.7768729841397901
e-type_smote_yeo_1000.csv	SVM_rbf_5	0.7634408602150536	0.004250373199151	0.7581633248347376	0.7687183955953697	0.7859934075393322	0.0045310210461699	0.7803674018311995	0.791619413247465
e-type_smote_yeo_2000.csv	svm_rbf_1	0.7623655913978495	0.0024043741693546	0.7593801665535508	0.7653510162421483	0.7878532365099605	0.0027024908284642	0.7844976509427806	0.7912088220771405	0.0210211499458796
e-type_smote_yeo_2000.csv	svm_rbf_bal	0.7623655913978495	0.0024043741693546	0.7593801665535508	0.7653510162421483	0.7878532365099605	0.0027024908284642	0.7844976509427806	0.7912088220771405	0.0209941480779821
e-type_flow_yeo_10000.csv	rf_bal_100_10	0.7623655913978494	0.0077445485434881	0.7527494642890588	0.7719817185066401	0.7777426357650922	0.0156335374152242	0.7583310351920366	0.7971542363381477	0.0276929069803181
e-type_flow_yeo_10000.csv	SVM_rbf_5	0.7612903225806452	0.008585333022941559	0.7506302236534688	0.7719504215078217	0.777065363146387	0.007733220970897719	0.7674633010766689	0.786667425216105	nan
e-type_flow_yeo_10000.csv	SVM_rbf_5	0.7612903225806452	0.0085853330229415	0.7506302236534688	0.7719504215078217	0.777065363146387	0.0077332209708977	0.7674633010766689	0.786667425216105
e-type_smote_yeo_10000.csv	svm_rbf_1	0.7612903225806452	0.0012021870846773	0.7597976101584959	0.7627830350027945	0.7812523443719164	0.0010636681237282	0.7799316259566461	0.7825730627871866	0.0220157184785928
e-type_smote_yeo_10000.csv	svm_rbf_bal	0.7612903225806452	0.0012021870846773	0.7597976101584959	0.7627830350027945	0.7812523443719164	0.0010636681237282	0.7799316259566461	0.7825730627871866	0.0220334407990754
e-type_gan_yeo_10000.csv	SVM_rbf_2	0.760215053763441	0.014148061684882533	0.7426479149249563	0.7777821926019257	0.7755071509036281	0.015034066783096989	0.7568398914324654	0.7941744103747908	nan
e-type_gan_yeo_10000.csv	SVM_rbf_2	0.760215053763441	0.0141480616848825	0.7426479149249563	0.7777821926019257	0.7755071509036281	0.0150340667830969	0.7568398914324654	0.7941744103747908
e-type_smote_yeo_2000.csv	svm_rbf_2	0.7596774193548387	0.0014723724664117	0.7578492274713488	0.7615056112383286	0.7784954201209364	0.0018989142912797	0.7761376066097797	0.7808532336320931	0.0210774961278272
e-type_gan_yeo_1000.csv	rf_bal_200_20	0.7586021505376344	0.0122304442645992	0.7434160482122437	0.773788252863025	0.7699531294866555	0.0168573880212134	0.7490219176769634	0.7908843412963477	0.0282257164436257
e-type_smote_yeo_1000.csv	svm_rbf_2	0.7580645161290323	0.0019008246806089	0.7557043305562229	0.7604247017018416	0.7770642305573737	0.0038049429141963	0.7723397699255956	0.7817886911891518	0.0202155969860464
e-type_smote_yeo_5000.csv	svm_rbf_2	0.7580645161290323	0.0019008246806089	0.7557043305562229	0.7604247017018416	0.7762087035275103	0.0028122018952424	0.7727168936785074	0.7797005133765131	0.022120789301365
e-type_gan_yeo_10000.csv	svm_rbf_2	0.7575268817204301	0.016173773071496	0.737444489982436	0.7776092734584243	0.7758819276070373	0.0175302165192307	0.7541152888743916	0.7976485663396831	0.0210029467843471
e-type_flow_yeo_1000.csv	rf_bal_100_10	0.75752688172043	0.0114681338751083	0.7432873127611269	0.7717664506797332	0.7838805043387367	0.0213212074346741	0.7574067286688674	0.810354280008606	0.024125795059303
e-type_smote_yeo_5000.csv	logistic_l1_2	0.75752688172043	0.0022490860928335	0.7547342724900978	0.7603194909507622	0.8036127384960521	0.0018659237583069	0.8012958881419693	0.8059295888501349	0.024500946913325
e-type_smote_yeo_1000.csv	svm_rbf_1	0.756989247311828	0.0030649877018794	0.7531835624274671	0.760794932196189	0.7891345599891366	0.0023766667042172	0.7861835385067805	0.7920855814714928	0.0204322025326663
e-type_smote_yeo_1000.csv	svm_rbf_bal	0.756989247311828	0.0030649877018794	0.7531835624274671	0.760794932196189	0.7891345599891366	0.0023766667042172	0.7861835385067805	0.7920855814714928	0.020421018126518
e-type_smote_yeo_1000.csv	svm_rbf_auto	0.7559139784946237	0.0022490860928335	0.7531213692642915	0.7587065877249559	0.7879523540399417	0.0032623207891911	0.7839016477654114	0.792003060314472	0.0204724272605949
e-type_smote_yeo_10000.csv	svm_rbf_3	0.7559139784946237	0.005509113315032	0.7490735108293234	0.762754446159924	0.7888650774992335	0.0039459908011764	0.7839654827841696	0.7937646722142975	0.0214659267167888
e-type_smote_yeo_5000.csv	svm_rbf_1	0.7559139784946236	0.0012021870846773	0.7544212660724743	0.7574066909167729	0.7753301088430138	2.2489110063036035e-05	0.7753021849246968	0.7753580327613308	0.0214180221529175
e-type_smote_yeo_5000.csv	svm_rbf_bal	0.7559139784946236	0.0012021870846773	0.7544212660724743	0.7574066909167729	0.7753301088430138	2.2489110063036035e-05	0.7753021849246968	0.7753580327613308	0.0214397142254555
e-type_flow_yeo_10000.csv	rf_200_10	0.7553763440860215	0.0102362541745482	0.7426663558010219	0.7680863323710211	0.7708917418199057	0.0078542514562329	0.7611394005538618	0.7806440830859497	0.0245530316596705
e-type_smote_yeo_5000.csv	svm_rbf_3	0.7553763440860214	0.0019008246806089	0.753016158513212	0.7577365296588308	0.7949695844255888	0.0012165699480945	0.7934590133197432	0.7964801555314345	0.0221933238994634
e-type_gan_yeo_1000.csv	rf_200_20	0.7548387096774194	0.0128076658597543	0.7389358920783389	0.7707415272764999	0.7666112391677858	0.01250889002449	0.7510794007668864	0.7821430775686853	0.0278631871179729
e-type_gan_yeo_1000.csv	svm_rbf_2	0.7548387096774194	0.0158351359946485	0.7351767914062037	0.7745006279486351	0.7724766375554298	0.0146161639460287	0.754328272991802	0.7906250021190576	0.0207827693787076
e-type_gan_yeo_1000.csv	svm_rbf_auto	0.7548387096774194	0.0142751806960771	0.737113731739247	0.7725636876155918	0.7659337042589319	0.018426640477038	0.7430540081707495	0.7888134003471143	0.0205510591868105
e-type_gan_yeo_1000.csv	SVM_rbf_2	0.7543010752688172	0.01597145244893864	0.7344698977639467	0.7741322527736877	0.7729083311738849	0.01595828903348549	0.753093498208076	0.7927231641396938	nan
e-type_gan_yeo_10000.csv	SVM_rbf_4	0.7543010752688172	0.010685272534597728	0.7410335570516117	0.7675685934860227	0.7639535683127736	0.017780986812514152	0.7418755571351389	0.7860315794904084	nan
e-type_smote_yeo_1000.csv	random_forest_5	0.7543010752688172	0.007974406975371674	0.7443995412204731	0.7642026093171612	0.7928692130601815	0.011662035942271685	0.7783888828849045	0.8073495432354586	nan
e-type_gan_yeo_1000.csv	SVM_rbf_2	0.7543010752688172	0.0159714524489386	0.7344698977639467	0.7741322527736877	0.7729083311738849	0.0159582890334854	0.753093498208076	0.7927231641396938
e-type_gan_yeo_10000.csv	SVM_rbf_4	0.7543010752688172	0.0106852725345977	0.7410335570516117	0.7675685934860227	0.7639535683127736	0.0177809868125141	0.7418755571351389	0.7860315794904084
e-type_smote_yeo_1000.csv	random_forest_5	0.7543010752688172	0.0079744069753716	0.7443995412204731	0.7642026093171612	0.7928692130601815	0.0116620359422716	0.7783888828849045	0.8073495432354586
e-type_gan_yeo_1000.csv	SVM_rbf_4	0.7537634408602151	0.013114312814677911	0.7374798707770472	0.7700470109433829	0.7627964039759138	0.020359592093974366	0.7375166314547117	0.7880761764971158	nan
e-type_gan_yeo_1000.csv	SVM_rbf_4	0.7537634408602151	0.0131143128146779	0.7374798707770472	0.7700470109433829	0.7627964039759138	0.0203595920939743	0.7375166314547117	0.7880761764971158
e-type_gan_yeo_1000.csv	SVM_rbf_5	0.753763440860215	0.01597145244893864	0.7339322633553444	0.7735946183650855	0.7734251179695228	0.013809059502653811	0.756278905936024	0.7905713300030217	nan
e-type_gan_yeo_1000.csv	SVM_rbf_5	0.753763440860215	0.0159714524489386	0.7339322633553444	0.7735946183650855	0.7734251179695228	0.0138090595026538	0.756278905936024	0.7905713300030217
e-type_gan_yeo_1000.csv	svm_rbf_1	0.753763440860215	0.0146745635096302	0.7355425636609523	0.7719843180594776	0.764502287723773	0.0174427148216676	0.7428442966987732	0.7861602787487729	0.0207078251771246
e-type_gan_yeo_1000.csv	svm_rbf_bal	0.753763440860215	0.0146745635096302	0.7355425636609523	0.7719843180594776	0.764502287723773	0.0174427148216676	0.7428442966987732	0.7861602787487729	0.0207026192187361
e-type_smote_yeo_5000.csv	svm_rbf_auto	0.753763440860215	0.0024043741693546	0.7507780160159162	0.7567488657045137	0.7750986596704195	0.0016881679936355	0.7730025222498023	0.7771947970910367	0.0214985337241132
e-type_flow_yeo_10000.csv	rf_100_10	0.753225806451613	0.0069581608094326	0.7445861086808281	0.7618655042223978	0.7635797224328471	0.012396848353515	0.7481870021410959	0.7789724427245983	0.0248663087770305
e-type_smote_yeo_5000.csv	mlp_128_64_es	0.753225806451613	0.0064179227883404	0.745256902782079	0.7611947101211469	0.7841684089080015	0.0058750543846484	0.7768735653910943	0.7914632524249088	0.0254984084690149
e-type_smote_yeo_1000.csv	logistic_l1_3	0.7526881720430108	0.0026881720430107	0.7493503655962265	0.756025978489795	0.7976632943052475	0.0036401064427934	0.7931435051856014	0.8021830834248936	0.0259229581724067
e-type_smote_yeo_5000.csv	mlp_128_64_alpha	0.7526881720430108	0.0161290322580645	0.7326613333623049	0.7727150107237166	0.7784350985035671	0.0150116429296621	0.7597956819239154	0.7970745150832187	0.0267418531515266
e-type_gan_yeo_1000.csv	SVM_rbf_1	0.7521505376344086	0.015372019844619124	0.7330636540136712	0.771237421255146	0.7626070274083918	0.0198203636444018	0.7379967954398313	0.7872172593769523	nan
e-type_gan_yeo_1000.csv	SVM_rbf_1	0.7521505376344086	0.0153720198446191	0.7330636540136712	0.771237421255146	0.7626070274083918	0.0198203636444018	0.7379967954398313	0.7872172593769523
e-type_flow_yeo_100.csv	rf_bal_200_20	0.7521505376344086	0.0109853853450013	0.7385103801451252	0.7657906951236921	0.8081587753191306	0.0076588333354786	0.7986490776982239	0.8176684729400373	0.0260601512217575
e-type_flow_yeo_100.csv	rf_200_20	0.7521505376344086	0.0048087483387092	0.7461796879458112	0.758121387323006	0.8144090640534662	0.0038766250523142	0.8095955982914728	0.8192225298154597	0.0258200457252793
e-type_smote_yeo_1000.csv	logistic_regression_1	0.7516129032258065	0.0061886367920544775	0.7439286957231532	0.7592971107284598	0.8045401657484825	0.003761167558656252	0.7998700593996871	0.8092102720972779	nan
e-type_smote_yeo_1000.csv	logistic_regression_1	0.7516129032258065	0.0061886367920544	0.7439286957231532	0.7592971107284598	0.8045401657484825	0.0037611675586562	0.7998700593996871	0.8092102720972779
e-type_flow_yeo_10000.csv	random_forest_2	0.7510752688172043	0.0064739755799958516	0.7430367664142731	0.7591137712201356	0.7560458936452094	0.009835791353336688	0.7438331456279272	0.7682586416624915	nan
e-type_flow_yeo_10000.csv	random_forest_2	0.7510752688172043	0.0064739755799958	0.7430367664142731	0.7591137712201356	0.7560458936452094	0.0098357913533366	0.7438331456279272	0.7682586416624915
e-type_flow_yeo_1000.csv	extra_tree_bal	0.7510752688172042	0.0152777120842825	0.7321054837472278	0.7700450538871806	0.76486688439789	0.0224471602029699	0.7369950537119498	0.7927387150838301	0.0229645287792536
e-type_smote_yeo_1000.csv	logistic_l2_1	0.75	0.0046560505579808	0.7442187496483387	0.7557812503516613	0.8025349672707751	0.0046591591369385	0.7967498571085364	0.8083200774330138	0.0242791838231622
e-type_smote_yeo_1000.csv	logistic_l2_3	0.75	0.0050291093908251	0.7437555359263839	0.7562444640736161	0.795460486908711	0.0035081681772999	0.7911045207833134	0.7998164530341085	0.0256011070825287
e-type_smote_yeo_1000.csv	logistic_l2_balanced_1	0.75	0.0046560505579808	0.7442187496483387	0.7557812503516613	0.8025349672707751	0.0046591591369385	0.7967498571085364	0.8083200774330138	0.0242791980756802
e-type_flow_yeo_100.csv	rf_100_20	0.7494623655913978	0.0168306191854822	0.7285643916813068	0.7703603395014887	0.8073007048791097	0.0120992267891437	0.7922775305689272	0.8223238791892921	0.0260363757115749
e-type_smote_yeo_1000.csv	logistic_regression_3	0.7489247311827957	0.005889489865646942	0.741611963648836	0.7562374987167554	0.7898201034643444	0.00384667426672093	0.7850438265145402	0.7945963804141486	nan
e-type_smote_yeo_1000.csv	random_forest_1	0.7489247311827957	0.009803538993984114	0.7367520297589788	0.7610974326066126	0.7847463819112225	0.01205505723455449	0.7697780513467903	0.7997147124756546	nan
e-type_smote_yeo_1000.csv	logistic_regression_3	0.7489247311827957	0.0058894898656469	0.741611963648836	0.7562374987167554	0.7898201034643444	0.0038466742667209	0.7850438265145402	0.7945963804141486
e-type_smote_yeo_1000.csv	random_forest_1	0.7489247311827957	0.0098035389939841	0.7367520297589788	0.7610974326066126	0.7847463819112225	0.0120550572345544	0.7697780513467903	0.7997147124756546
e-type_smote_yeo_10000.csv	logistic_l1_2	0.7489247311827956	0.0024043741693546	0.7459393063384968	0.7519101560270943	0.7938447783598898	0.0009203508761173	0.7927020118112995	0.79498754490848	0.0251949163737222
e-type_gan_yeo_10000.csv	svm_rbf_auto	0.7483870967741936	0.0101654141941876	0.7357650679424412	0.7610091256059459	0.758204411433614	0.0186189102200543	0.7350859809275843	0.7813228419396436	0.0220042555074575
e-type_flow_yeo_1000.csv	mlp_4	0.7483870967741935	0.020348592330941447	0.7231209822627382	0.7736532112856487	0.7670718902952566	0.019607047979101212	0.7427265247085527	0.7914172558819604	nan
e-type_flow_yeo_1000.csv	mlp_4	0.7483870967741935	0.0203485923309414	0.7231209822627382	0.7736532112856487	0.7670718902952566	0.0196070479791012	0.7427265247085527	0.7914172558819604
e-type_flow_yeo_1000.csv	random_forest_4	0.7478494623655914	0.008372264248600764	0.7374539232646553	0.7582450014665274	0.7545450229384562	0.01280690667753785	0.738643147988602	0.7704468978883103	nan
e-type_flow_yeo_1000.csv	random_forest_4	0.7478494623655914	0.0083722642486007	0.7374539232646553	0.7582450014665274	0.7545450229384562	0.0128069066775378	0.738643147988602	0.7704468978883103
e-type_flow_yeo_100.csv	rf_200_20	0.7478494623655914	0.00938938128848	0.7361910056542775	0.7595079190769052	0.8106572805931911	0.0109194013394709	0.7970990530680321	0.8242155081183501	0.0259883823529411
e-type_gan_yeo_1000.csv	rf_100_20	0.7478494623655914	0.0058278181152362	0.7406132704238227	0.75508565430736	0.7574778682108431	0.0132875942530619	0.7409791408040767	0.7739765956176095	0.0281308777147135
e-type_smote_yeo_2000.csv	logistic_l1_1	0.7478494623655914	0.0035049475296788	0.7434974952023959	0.7522014295287868	0.796882432526847	0.0030581496886875	0.7930852381572856	0.8006796268964084	0.0256345507481402
e-type_smote_yeo_2000.csv	logistic_l1_balanced_1	0.7478494623655914	0.0035049475296788	0.7434974952023959	0.7522014295287868	0.796882432526847	0.0030581496886875	0.7930852381572856	0.8006796268964084	0.0256343572441039
e-type_smote_yeo_2000.csv	mlp_128_64_es	0.7478494623655914	0.0120818306743248	0.7328478881848882	0.7628510365462945	0.7850200554927858	0.0092980660259611	0.7734749816554283	0.7965651293301432	0.0257214037582232
e-type_smote_yeo_10000.csv	logistic_l2_2	0.7478494623655914	0.0048087483387092	0.741878612676994	0.7538203120541888	0.7989507278992253	0.0053649566161873	0.7922892544169804	0.8056122013814702	0.0244718702688306
e-type_smote_yeo_10000.csv	mlp_50_lr0.001	0.7478494623655914	0.0081536295097328	0.7377253941486642	0.7579735305825185	0.7770162644656909	0.0104109089081391	0.7640894136858757	0.7899431152455062	0.027323675559611
e-type_smote_yeo_2000.csv	logistic_l1_2	0.7473118279569894	0.0038016493612179	0.7425914568113706	0.7520321991026081	0.8078072984694622	0.0056391566661527	0.8008053606568695	0.8148092362820549	0.0239519091802592
e-type_smote_yeo_5000.csv	logistic_l2_2	0.7473118279569892	0.0026881720430107	0.743974021510205	0.7506496344037735	0.8041549072793002	0.0027271845524019	0.8007686604041252	0.8075411541544751	0.0241605520329158
e-type_smote_yeo_10000.csv	mlp_128_64	0.7473118279569892	0.0078373009339318	0.7375805335442374	0.7570431223697411	0.7737961569495899	0.0080868604962395	0.7637549934129131	0.7838373204862668	0.0269022912482
e-type_flow_yeo_100.csv	rf_200_10	0.7467741935483871	0.0141480616848825	0.7292070547099023	0.764341332386872	0.8094400139805215	0.0142398116823281	0.7917589524733732	0.8271210754876697	0.026110188122094
e-type_flow_yeo_10000.csv	extra_tree	0.7467741935483871	0.0151351486669454	0.7279814243411793	0.765566962755595	0.7585867452142928	0.0168369750210432	0.7376808794920073	0.7794926109365783	0.0246332953826691
e-type_smote_yeo_5000.csv	logistic_l2_1	0.7467741935483871	0.0029447449328234	0.7431178097814073	0.750430577315367	0.7945957818512259	0.0033009238556807	0.7904971435388152	0.7986944201636367	0.0253064854606459
e-type_smote_yeo_5000.csv	logistic_l2_3	0.7467741935483871	0.0022490860928335	0.743981584318055	0.7495668027787193	0.7887202953858033	0.0041640875654726	0.783549897770388	0.7938906930012187	0.027121049814861
e-type_smote_yeo_5000.csv	logistic_l2_balanced_1	0.7467741935483871	0.0029447449328234	0.7431178097814073	0.750430577315367	0.7945957818512259	0.0033009238556807	0.7904971435388152	0.7986944201636367	0.0253064478316403
e-type_flow_yeo_1000.csv	extra_tree	0.746774193548387	0.0117789797312938	0.7321486584804675	0.7613997286163066	0.7554055383598164	0.0146485366354948	0.7372169777931534	0.7735940989264793	0.0228591650853889
e-type_smote_yeo_2000.csv	logistic_l2_1	0.746236559139785	0.0024043741693546	0.7432511342954863	0.7492219839840838	0.7968578129737998	0.003123833663403	0.7929790611775752	0.8007365647700243	0.0245411679084288
e-type_smote_yeo_2000.csv	logistic_l2_balanced_1	0.746236559139785	0.0024043741693546	0.7432511342954863	0.7492219839840838	0.7968578129737998	0.003123833663403	0.7929790611775752	0.8007365647700243	0.0245411087262063
e-type_smote_yeo_10000.csv	logistic_l2_1	0.7462365591397849	0.0014723724664117	0.744408367256295	0.7480647510232749	0.7894724050851115	0.000500008335633	0.7888515627359541	0.7900932474342689	0.0258913453893752
e-type_smote_yeo_10000.csv	logistic_l2_balanced_1	0.7462365591397849	0.0014723724664117	0.744408367256295	0.7480647510232749	0.7894724050851115	0.000500008335633	0.7888515627359541	0.7900932474342689	0.0258913957838772
e-type_smote_yeo_10000.csv	mlp_50x2_lr0.001	0.7462365591397849	0.0190651862650506	0.7225640037354226	0.7699091145441472	0.7784196926309879	0.0242735733540353	0.7482800704895239	0.8085593147724518	0.0276534763631882
e-type_gan_yeo_100.csv	rf_200_20	0.7456989247311829	0.0098035389939841	0.733526223307366	0.7578716261549998	0.8128003550309353	0.0079291266460255	0.8029550439373672	0.8226456661245034	0.0276379628398052
e-type_flow_yeo_1000.csv	random_forest_3	0.7451612903225806	0.006693494407520817	0.7368502192945837	0.7534723613505775	0.7510563613801131	0.010942642247956663	0.7374692764556018	0.7646434463046244	nan
e-type_smote_yeo_1000.csv	mlp_4	0.7451612903225806	0.011778979731293883	0.7305357552546611	0.7597868253905001	0.7734877065243317	0.01011617332151916	0.760926818311412	0.7860485947372515	nan
e-type_flow_yeo_1000.csv	random_forest_3	0.7451612903225806	0.0066934944075208	0.7368502192945837	0.7534723613505775	0.7510563613801131	0.0109426422479566	0.7374692764556018	0.7646434463046244
e-type_smote_yeo_1000.csv	mlp_4	0.7451612903225806	0.0117789797312938	0.7305357552546611	0.7597868253905001	0.7734877065243317	0.0101161733215191	0.760926818311412	0.7860485947372515
e-type_smote_yeo_2000.csv	logistic_l2_3	0.7451612903225806	0.0022490860928335	0.7423686810922484	0.7479538995529128	0.7912062819125547	0.0049833060259107	0.7850186902281494	0.79739387359696	0.0263112253002152
e-type_smote_yeo_5000.csv	logistic_l1_1	0.7451612903225806	0.0044171173992352	0.7396767146721108	0.7506458659730504	0.7879489904765756	0.0029763810162315	0.7842533253237838	0.7916446556293675	0.0265154364211625
e-type_smote_yeo_5000.csv	logistic_l1_balanced_1	0.7451612903225806	0.0044171173992352	0.7396767146721108	0.7506458659730504	0.7880996134497792	0.002877618525886	0.7845265781256223	0.7916726487739361	0.0265142481659672
e-type_smote_yeo_10000.csv	mlp_128_64_es	0.7451612903225806	0.0133599716556872	0.728572694500691	0.7617498861444703	0.78260231502957	0.0126050570469869	0.7669510694990216	0.7982535605601184	0.0261032633941282
e-type_flow_yeo_10000.csv	extra_tree_bal	0.7446236559139786	0.0134408602150537	0.727934623680057	0.7613126881479002	0.7546651443028054	0.0229414489504839	0.7261795730743599	0.7831507155312509	0.0247550790638836
e-type_smote_yeo_5000.csv	logistic_l1_3	0.7446236559139786	0.0019008246806089	0.7422634703411692	0.746983841486788	0.7850182141559788	0.0040447386308424	0.7799960078159177	0.79004042049604	0.0276250365384198
e-type_gan_yeo_10000.csv	SVM_rbf_1	0.7446236559139785	0.005029109390825185	0.7383791918403624	0.7508681199875946	0.7521438567553332	0.00795083039506934	0.7422715968979514	0.7620161166127151	nan
e-type_gan_yeo_10000.csv	SVM_rbf_1	0.7446236559139785	0.0050291093908251	0.7383791918403624	0.7508681199875946	0.7521438567553332	0.0079508303950693	0.7422715968979514	0.7620161166127151
e-type_smote_yeo_1000.csv	mlp_128_64_es	0.7446236559139785	0.0112454304641676	0.7306606097623176	0.7585867020656394	0.7785847556295111	0.0080000959488544	0.7686513245076427	0.7885181867513795	0.0251826070507405
e-type_smote_yeo_1000.csv	SVM_rbf_3	0.7446236559139784	0.006304322257827185	0.7367958059333597	0.7524515058945971	0.7913976945164761	0.006014565857717709	0.7839296246261225	0.7988657644068298	nan
e-type_smote_yeo_1000.csv	SVM_rbf_3	0.7446236559139784	0.0063043222578271	0.7367958059333597	0.7524515058945971	0.7913976945164761	0.0060145658577177	0.7839296246261225	0.7988657644068298
e-type_flow_yeo_10000.csv	xgboost	0.7440860215053764	0.01030660726488215	0.7312886783209468	0.756883364689806	0.7535775212186037	0.02001265008916298	0.7287285340942405	0.7784265083429668	0.020534200402358357
e-type_flow_yeo_10000.csv	xgboost	0.7440860215053764	0.0103066072648821	0.7312886783209468	0.756883364689806	0.7535775212186037	0.0200126500891629	0.7287285340942405	0.7784265083429668
e-type_smote_yeo_2000.csv	logistic_l1_3	0.7440860215053764	0.0044171173992352	0.7386014458549066	0.7495705971558462	0.7881331872180957	0.0059337887024191	0.7807654154133535	0.7955009590228378	0.0267690936271109
e-type_smote_yeo_1000.csv	random_forest_3	0.7440860215053763	0.008372264248600764	0.7336904824044402	0.7544815606063123	0.7821813533806397	0.01331523162751428	0.765648309641011	0.7987143971202683	nan
e-type_smote_yeo_1000.csv	random_forest_3	0.7440860215053763	0.0083722642486007	0.7336904824044402	0.7544815606063123	0.7821813533806397	0.0133152316275142	0.765648309641011	0.7987143971202683
e-type_smote_yeo_1000.csv	mlp_8	0.7435483870967742	0.0153955065196519	0.724432340917211	0.7626644332763374	0.7808541151610513	0.0115186654538776	0.766551802959618	0.7951564273624846
e-type_smote_yeo_1000.csv	mlp_128_64_alpha	0.7430107526881721	0.0088342347984704	0.7320416013872324	0.7539799039891117	0.7774035558413077	0.0043677550227872	0.7719802716765392	0.7828268400060763	0.0266735586959218
e-type_smote_yeo_1000.csv	logistic_l1_1	0.74247311827957	0.0087932404482774	0.7315548681873947	0.7533913683717453	0.7927215618616361	0.0039312495750872	0.7878402707962964	0.7976028529269759	0.0254814980249879
e-type_smote_yeo_1000.csv	logistic_l1_balanced_1	0.74247311827957	0.0087932404482774	0.7315548681873947	0.7533913683717453	0.7926849329311562	0.0039669423897788	0.7877593233828194	0.7976105424794929	0.0254812405694074
e-type_smote_yeo_2000.csv	mlp_128_64_alpha	0.74247311827957	0.0104804240266762	0.7294599530797362	0.7554862834794037	0.7759850375442499	0.0120358399337256	0.7610405684103995	0.7909295066781002	0.0272086728449696
e-type_flow_yeo_10000.csv	random_forest_5	0.7424731182795699	0.008793240448277478	0.7315548681873946	0.7533913683717451	0.7571205529362612	0.011437186238920169	0.7429194105426425	0.7713216953298799	nan
e-type_flow_yeo_10000.csv	random_forest_5	0.7424731182795699	0.0087932404482774	0.7315548681873946	0.7533913683717451	0.7571205529362612	0.0114371862389201	0.7429194105426425	0.7713216953298799
e-type_flow_yeo_100.csv	rf_100_20	0.7424731182795699	0.0087932404482774	0.7315548681873946	0.7533913683717451	0.8024290760583875	0.0051082892667648	0.7960862971834349	0.8087718549333401	0.0260844291587602
e-type_smote_yeo_2000.csv	mlp_100_lr0.001	0.7424731182795699	0.0140197901187153	0.7250652496267881	0.7598809869323516	0.776689092491012	0.0134602936997081	0.7599759303988355	0.7934022545831886	0.0270665303777992
e-type_flow_yeo_100.csv	rf_bal_200_20	0.7419354838709677	0.0105833439166825	0.7287945267490142	0.7550764409929213	0.804222458594532	0.0123327612600828	0.788909312939445	0.819535604249619	0.0259911163507351
e-type_smote_yeo_1000.csv	mlp_100_lr0.001	0.7419354838709677	0.0155589205682664	0.7226165323504392	0.7612544353914963	0.7687674256070541	0.0167037445270908	0.7480269873925722	0.789507863821536	0.0264700174878259
e-type_flow_yeo_10000.csv	random_forest_1	0.7413978494623656	0.010985385345001361	0.7277576919730822	0.7550380069516491	0.7413381228292313	0.010773714500293836	0.7279607894072906	0.754715456251172	nan
e-type_flow_yeo_10000.csv	random_forest_1	0.7413978494623656	0.0109853853450013	0.7277576919730822	0.7550380069516491	0.7413381228292313	0.0107737145002938	0.7279607894072906	0.754715456251172
e-type_flow_yeo_10000.csv	random_forest_4	0.7408602150537635	0.007974406975371674	0.7309586810054195	0.7507617491021076	0.7419365332612741	0.0063033589196242485	0.7341098794230201	0.749763187099528	nan
e-type_flow_yeo_10000.csv	random_forest_4	0.7408602150537635	0.0079744069753716	0.7309586810054195	0.7507617491021076	0.7419365332612741	0.0063033589196242	0.7341098794230201	0.749763187099528
e-type_flow_yeo_1000.csv	mlp_2	0.7408602150537634	0.010685272534597726	0.7275926968365579	0.7541277332709689	0.7584031131520182	0.014980442124108135	0.739802437489338	0.7770037888146984	nan
e-type_flow_yeo_1000.csv	mlp_2	0.7408602150537634	0.0106852725345977	0.7275926968365579	0.7541277332709689	0.7584031131520182	0.0149804421241081	0.739802437489338	0.7770037888146984
e-type_smote_yeo_2000.csv	mlp_128_64	0.7403225806451613	0.0070098950593576	0.7316186463187704	0.7490265149715523	0.7725725109174911	0.0094719342630822	0.7608115511496693	0.784333470685313	0.0271650489985708
e-type_flow_yeo_100.csv	rf_100_10	0.7403225806451612	0.0157436026498347	0.720774316032836	0.7598708452574864	0.7984504081922779	0.0154065446250866	0.779320656394588	0.8175801599899677	0.0264414253811054
e-type_smote_yeo_1000.csv	logistic_regression_4	0.7397849462365592	0.005170802167115948	0.7333645473438173	0.7462053451293011	0.7884053223685143	0.004479490792681957	0.7828432999209559	0.7939673448160728	nan
e-type_smote_yeo_1000.csv	logistic_regression_4	0.7397849462365592	0.0051708021671159	0.7333645473438173	0.7462053451293011	0.7884053223685143	0.0044794907926819	0.7828432999209559	0.7939673448160728
e-type_flow_yeo_100.csv	rf_100_10	0.7397849462365592	0.0083722642486007	0.7293894071356232	0.7501804853374953	0.7979805943096383	0.0052189110919216	0.791500460296973	0.8044607283223036	0.0265329155769449
e-type_smote_yeo_10000.csv	mlp_128_64_alpha	0.7397849462365592	0.0119313661404151	0.7249701984506184	0.7545996940225	0.7663402432836101	0.0079166162966586	0.7565104658404558	0.7761700207267643	0.0278050668345902
e-type_gan_yeo_1000.csv	random_forest_2	0.739247311827957	0.018526947247433076	0.7162430684341989	0.7622515552217151	0.7461533562325278	0.020665898190288322	0.7204932544591024	0.7718134580059531	nan
e-type_gan_yeo_1000.csv	random_forest_2	0.739247311827957	0.018526947247433	0.7162430684341989	0.7622515552217151	0.7461533562325278	0.0206658981902883	0.7204932544591024	0.7718134580059531
e-type_flow_yeo_100.csv	rf_200_10	0.739247311827957	0.012021870846773	0.7243201876064634	0.7541744360494506	0.800375811588198	0.0140425252765687	0.7829397135084163	0.8178119096679798	0.0263035662119536
e-type_smote_yeo_1000.csv	svm_poly_3	0.7392473118279569	0.0050291093908251	0.7330028477543408	0.745491775901573	0.7644765511627157	0.0065309276723786	0.7563673333970504	0.772585768928381	0.0248226504376259
e-type_gan_yeo_100.csv	rf_bal_200_20	0.7381720430107527	0.0030649877018794	0.7343663581263917	0.7419777278951136	0.804326535858001	0.0063388868510668	0.796455768266344	0.8121973034496579	0.0278512129093961
e-type_smote_yeo_1000.csv	mlp_2	0.7376344086021506	0.012975826221663612	0.7215227923357624	0.7537460248685387	0.7725413753020616	0.01639301985814951	0.7521867527223579	0.7928959978817652	nan
e-type_smote_yeo_1000.csv	mlp_2	0.7376344086021506	0.0129758262216636	0.7215227923357624	0.7537460248685387	0.7725413753020616	0.0163930198581495	0.7521867527223579	0.7928959978817652
e-type_flow_yeo_1000.csv	mlp_128_64	0.7370967741935484	0.0237717107198216	0.7075802968170313	0.7666132515700654	0.7544017724133607	0.0217492184638177	0.7273965508577696	0.7814069939689519	0.0221625970243819
e-type_gan_yeo_100.csv	rf_200_10	0.7370967741935484	0.0141480616848825	0.7195296353550635	0.7546639130320332	0.8017580489091122	0.0104154595342308	0.7888255477807096	0.8146905500375148	0.0296147919469105
e-type_smote_yeo_5000.csv	mlp_128_64	0.7370967741935484	0.0064179227883404	0.7291278705240144	0.7450656778630823	0.771834496065323	0.0052455251657683	0.7653213163153166	0.7783476758153293	0.0278833747604351
e-type_smote_yeo_10000.csv	logistic_l1_1	0.7370967741935484	0.0039872034876858	0.7321460071693764	0.7420475412177203	0.7777216888445014	0.003649565565818	0.773190154672341	0.7822532230166619	0.0285690990381274
e-type_smote_yeo_10000.csv	logistic_l1_balanced_1	0.7370967741935484	0.0039872034876858	0.7321460071693764	0.7420475412177203	0.7777216888445014	0.003649565565818	0.773190154672341	0.7822532230166619	0.0285686244175933
e-type_smote_yeo_1000.csv	mlp_50x2_lr0.001	0.7365591397849462	0.0131692996923826	0.7202072944753588	0.7529109850945337	0.7701442973233974	0.0130997385223793	0.7538788236142759	0.7864097710325189	0.0273072884433861
e-type_smote_yeo_5000.csv	mlp_100_lr0.001	0.7365591397849462	0.0057024740418269	0.7294785830665181	0.7436396965033744	0.7710106359223151	0.0039419003037958	0.7661161202305834	0.7759051516140468	0.0277453765410941
e-type_smote_yeo_2000.csv	logistic_l2_2	0.7360215053763441	0.0051708021671159	0.7296011064836022	0.7424419042690861	0.7979035283112987	0.0037420123623481	0.7932572062801376	0.8025498503424598	0.0237284033647355
e-type_smote_yeo_5000.csv	mlp_50x2_lr0.001	0.7360215053763441	0.0156052959932257	0.7166449711602422	0.7553980395924461	0.7714259223009609	0.0147839610039549	0.7530692101715015	0.7897826344304202	0.0282096647108497
e-type_smote_yeo_10000.csv	mlp_100_lr0.001	0.735483870967742	0.0077445485434881	0.7258677438589514	0.7450999980765327	0.7679539525753821	0.0132915430338482	0.7514503221096767	0.7844575830410876	0.0275785456839524
e-type_flow_yeo_100.csv	rf_bal_100_10	0.7354838709677419	0.0165273399450961	0.714962467971841	0.7560052739636428	0.8015894555931432	0.015069805078147	0.7828778211676597	0.8203010900186267	0.0271466902630453
e-type_smote_yeo_1000.csv	mlp_3	0.7354838709677418	0.004883307022737885	0.7294204444454325	0.7415472974900511	0.764660356810495	0.008425311288007047	0.7541989511105169	0.7751217625104732	nan
e-type_smote_yeo_1000.csv	mlp_3	0.7354838709677418	0.0048833070227378	0.7294204444454325	0.7415472974900511	0.764660356810495	0.008425311288007	0.7541989511105169	0.7751217625104732
e-type_gan_yeo_1000.csv	extra_tree	0.7349462365591398	0.0122599508075176	0.719723497021696	0.7501689760965836	0.7392704539123226	0.0161757961323218	0.7191855502125348	0.7593553576121104	0.0301200379506641
e-type_smote_yeo_2000.csv	mlp_50x2_lr0.001	0.7349462365591398	0.0121116992753427	0.719907575611876	0.7499848975064036	0.768669816323928	0.0056720157869039	0.7616270785240858	0.77571255412377	0.0284660345608362
e-type_gan_yeo_100.csv	xgboost	0.7344086021505378	0.014649921068213657	0.7162183225836101	0.7525988817174656	0.791771223101105	0.006437510413862406	0.7837779981821502	0.7997644480200599	0.0233393761545806
e-type_gan_yeo_100.csv	xgboost	0.7344086021505378	0.0146499210682136	0.7162183225836101	0.7525988817174656	0.791771223101105	0.0064375104138624	0.7837779981821502	0.7997644480200599
e-type_smote_yeo_1000.csv	mlp_9	0.7344086021505377	0.0064179227883404	0.7264396984810038	0.7423775058200717	0.7626275743256403	0.004194829036645	0.7574190061322184	0.7678361425190623
e-type_gan_yeo_1000.csv	xgboost	0.7344086021505376	0.007459374691135266	0.7251465651474426	0.7436706391536326	0.7515677205267731	0.011433847770078024	0.7373707233897249	0.7657647176638214	0.02289763883539092
e-type_gan_yeo_1000.csv	xgboost	0.7344086021505376	0.0074593746911352	0.7251465651474426	0.7436706391536326	0.7515677205267731	0.011433847770078	0.7373707233897249	0.7657647176638214
e-type_smote_yeo_1000.csv	mlp_128_64	0.7344086021505376	0.0117789797312938	0.7197830670826181	0.7490341372184571	0.7749089984305626	0.0068350760530751	0.7664221305704746	0.7833958662906506	0.0272081980996189
e-type_smote_yeo_1000.csv	mlp_6	0.7338709677419355	0.0032923249230956	0.7297830064145386	0.7379589290693324	0.7813579756404151	0.006923909728003	0.7727608062043408	0.7899551450764893
e-type_smote_yeo_1000.csv	mlp_1	0.7338709677419354	0.008710672981730987	0.7230552387003938	0.744686696783477	0.76801645406981	0.012664394522900841	0.752291531331675	0.783741376807945	nan
e-type_smote_yeo_1000.csv	mlp_1	0.7338709677419354	0.0087106729817309	0.7230552387003938	0.744686696783477	0.76801645406981	0.0126643945229008	0.752291531331675	0.783741376807945
e-type_smote_yeo_1000.csv	mlp_10	0.7338709677419354	0.0155589205682664	0.7145520162214068	0.7531899192624639	0.7630954437492907	0.0098142583994235	0.7509094324256576	0.7752814550729239
e-type_gan_yeo_10000.csv	svm_rbf_1	0.7338709677419354	0.0065846498461913	0.7256950450871417	0.7420468903967291	0.740655988605724	0.0085984157535326	0.7299796453229744	0.7513323318884736	0.0227726719105664
e-type_gan_yeo_10000.csv	svm_rbf_bal	0.7338709677419354	0.0065846498461913	0.7256950450871417	0.7420468903967291	0.740655988605724	0.0085984157535326	0.7299796453229744	0.7513323318884736	0.0227274830538824
e-type_gan_yeo_1000.csv	random_forest_4	0.7333333333333334	0.01065140470761233	0.720107867577593	0.7465587990890737	0.7366189253730374	0.016497868951429958	0.7161341154489631	0.7571037352971117	nan
e-type_gan_yeo_1000.csv	random_forest_4	0.7333333333333334	0.0106514047076123	0.720107867577593	0.7465587990890737	0.7366189253730374	0.0164978689514299	0.7161341154489631	0.7571037352971117
e-type_smote_yeo_2000.csv	mlp_50_lr0.001	0.7333333333333334	0.0162850873450117	0.7131127266694285	0.7535539399972383	0.7635927043281278	0.0133813530550302	0.7469775599924428	0.7802078486638128	0.0281284066993771
e-type_smote_yeo_1000.csv	logistic_regression_6	0.7327956989247313	0.009803538993984114	0.7206229975009144	0.7449684003485482	0.7720884994986952	0.005978240739126008	0.7646655332003274	0.779511465797063	nan
e-type_smote_yeo_1000.csv	logistic_regression_6	0.7327956989247313	0.0098035389939841	0.7206229975009144	0.7449684003485482	0.7720884994986952	0.005978240739126	0.7646655332003274	0.779511465797063
e-type_smote_yeo_2000.csv	svm_poly_3	0.7327956989247313	0.0030649877018794	0.7289900140403703	0.7366013838090922	0.7601058577389	0.00112375005229	0.7587105377559918	0.7615011777218083	0.0248778111024532
e-type_smote_yeo_1000.csv	mlp_7	0.7327956989247312	0.0101654141941876	0.7201736700929788	0.7454177277564835	0.777733189091334	0.015543767286815	0.7584330528548383	0.7970333253278298
e-type_smote_yeo_2000.csv	svm_rbf_3	0.7327956989247312	0.004498172185667	0.7272104804640668	0.7383809173853956	0.7845383410609095	0.0024887864074281	0.781448104579587	0.7876285775422319	0.0216782092890789
e-type_smote_yeo_10000.csv	logistic_l1_3	0.7327956989247312	0.0024043741693546	0.7298102740804324	0.7357811237690299	0.7738716713343677	0.0011134762129876	0.7724891080078446	0.7752542346608908	0.0292750980167517
e-type_flow_yeo_100.csv	random_forest_5	0.7327956989247312	0.0086273153418716	0.7220834720635781	0.7435079257858842	0.7814137890039612	0.0097817866020428	0.7692680967420926	0.7935594812658298
e-type_smote_yeo_10000.csv	logistic_l2_3	0.731720430107527	0.0039872034876858	0.726769663083355	0.7366711971316989	0.7745835427483098	0.0026811495234302	0.7712544559112653	0.7779126295853542	0.0288161717099875
e-type_smote_yeo_1000.csv	mlp_12	0.7317204301075269	0.0171496106534801	0.7104263759758888	0.753014484239165	0.7557587262788901	0.0147052891653654	0.7374996981390799	0.7740177544187002
e-type_flow_yeo_100.csv	rf_bal_100_10	0.7317204301075269	0.0069581608094326	0.723080732336742	0.7403601278783117	0.8008194219077055	0.0076777705868821	0.7912862105835061	0.8103526332319049	0.0270918621984404
e-type_flow_yeo_10000.csv	random_forest_3	0.7311827956989247	0.012464540988569485	0.7157060238992828	0.7466595674985667	0.727716823604841	0.019509759628863893	0.7034922574600715	0.7519413897496106	nan
e-type_flow_yeo_10000.csv	random_forest_3	0.7311827956989247	0.0124645409885694	0.7157060238992828	0.7466595674985667	0.727716823604841	0.0195097596288638	0.7034922574600715	0.7519413897496106
e-type_gan_yeo_1000.csv	extra_tree_bal	0.7311827956989247	0.0019008246806089	0.7288226101261154	0.7335429812717341	0.7362323446047989	0.0084139002220246	0.7257851076146322	0.7466795815949656	0.0300454269449715
e-type_smote_yeo_1000.csv	mlp_5	0.7306451612903226	0.0111486243835095	0.7168023157638223	0.744488006816823	0.7795034688556333	0.0080084462579665	0.7695596694555665	0.7894472682557
e-type_smote_yeo_1000.csv	logistic_l1_2	0.7306451612903226	0.0039872034876858	0.7256943942661507	0.7355959283144946	0.7931063917724559	0.0053990668879164	0.786402564793836	0.7998102187510758	0.024016083801713
e-type_smote_yeo_1000.csv	mlp_50_lr0.001	0.7306451612903226	0.0123772735841089	0.715276746285016	0.7460135762956293	0.763236494416446	0.0059366842465405	0.7558651273188132	0.7706078615140789	0.0279851726350488
e-type_gan_yeo_100.csv	rf_100_20	0.7301075268817205	0.0067472582785006	0.721729699190724	0.738485354572717	0.8014401908584693	0.012131628984987	0.7863767839082455	0.8165035978086931	0.0279863918777699
e-type_smote_yeo_1000.csv	SVM_rbf_6	0.7301075268817204	0.005574312191754759	0.7231861041184702	0.7370289496449707	0.7859813883011519	0.007874769996854391	0.7762035699019226	0.7957592067003812	nan
e-type_smote_yeo_1000.csv	logistic_regression_2	0.7301075268817204	0.0067472582785006036	0.7217296991907239	0.7384853545727169	0.7901428976833701	0.006082322417612235	0.7825906969119533	0.7976950984547869	nan
e-type_smote_yeo_1000.csv	logistic_regression_5	0.7301075268817204	0.0030649877018794004	0.7263018419973595	0.7339132117660814	0.7925116314835668	0.004858588415047793	0.7864788971665121	0.7985443658006216	nan
e-type_smote_yeo_1000.csv	SVM_rbf_6	0.7301075268817204	0.0055743121917547	0.7231861041184702	0.7370289496449707	0.7859813883011519	0.0078747699968543	0.7762035699019226	0.7957592067003812
e-type_smote_yeo_1000.csv	logistic_regression_2	0.7301075268817204	0.0067472582785006	0.7217296991907239	0.7384853545727169	0.7901428976833701	0.0060823224176122	0.7825906969119533	0.7976950984547869
e-type_smote_yeo_1000.csv	logistic_regression_5	0.7301075268817204	0.0030649877018794	0.7263018419973595	0.7339132117660814	0.7925116314835668	0.0048585884150477	0.7864788971665121	0.7985443658006216
e-type_smote_yeo_1000.csv	logistic_l2_2	0.7295698924731182	0.0064739755799958	0.721531390070187	0.7376083948760495	0.7906591828664634	0.0049666778055086	0.7844922378446857	0.7968261278882411	0.0235487546608722
e-type_flow_yeo_100.csv	random_forest_1	0.729032258064516	0.0136277331781038	0.7121111924001374	0.7459533237288946	0.772437257381273	0.0127538228083919	0.7566012947606227	0.7882732200019233
e-type_flow_yeo_100.csv	xgboost	0.728494623655914	0.0073618623320586	0.7193536642384644	0.7376355830733636	0.7902213519362774	0.0100011560065793	0.7778032765824885	0.8026394272900663	0.0229821909323475
e-type_flow_yeo_100.csv	random_forest_2	0.7284946236559139	0.0126086445156543	0.7128389236946765	0.7441503236171513	0.7778113117361423	0.0128176371493429	0.761896113145764	0.7937265103265205
e-type_flow_yeo_1000.csv	mlp_100_lr0.001	0.7279569892473118	0.0081536295097328	0.7178329210303847	0.7380810574642389	0.7407756697634265	0.0139487524635943	0.7234560060095252	0.7580953335173277	0.0215924032449417
e-type_smote_yeo_5000.csv	svm_poly_3	0.7279569892473118	0.0022490860928335	0.7251643800169796	0.730749598477644	0.7562809780139723	0.002927679470584	0.7526457838170679	0.7599161722108767	0.02500372130194
e-type_gan_yeo_100.csv	rf_bal_100_10	0.7268817204301075	0.0152777120842825	0.7079119353601311	0.7458515055000838	0.7917429258834867	0.0122261211977149	0.7765621913546081	0.8069236604123653	0.0297805086332841
e-type_flow_yeo_1000.csv	mlp_3	0.7252688172043011	0.023542617253560535	0.6960367969370642	0.7545008374715381	0.735619851520909	0.026745303571248588	0.702411170955459	0.768828532086359	nan
e-type_flow_yeo_1000.csv	mlp_3	0.7252688172043011	0.0235426172535605	0.6960367969370642	0.7545008374715381	0.735619851520909	0.0267453035712485	0.702411170955459	0.768828532086359
e-type_gan_yeo_100.csv	rf_100_10	0.7252688172043011	0.0122304442645992	0.7100827148789105	0.7404549195296918	0.7981743029462803	0.0100499785331235	0.7856956064189801	0.8106529994735806	0.0298867876295278
e-type_smote_yeo_1000.csv	svm_rbf_3	0.7252688172043011	0.0072131225080638	0.716312542671405	0.7342250917371973	0.7802919886761683	0.0098693121002911	0.7680376191542	0.7925463581981367	0.0213036739877992
e-type_smote_yeo_5000.csv	mlp_50_lr0.001	0.724731182795699	0.0137858939838258	0.7076137345529285	0.7418486310384695	0.758791456172516	0.0120964864372346	0.7437716844586416	0.7738112278863903	0.0293603009092018
e-type_smote_yeo_10000.csv	svm_poly_3	0.7247311827956989	0.0014723724664117	0.722902990912209	0.7265593746791889	0.7503282180175302	0.0003039384050577	0.7499508286422986	0.7507056073927619	0.0253220355207121
e-type_flow_yeo_100.csv	extra_tree_bal	0.7241935483870969	0.0167445284972015	0.7034024701852247	0.7449846265889691	0.7789211430836437	0.0133735607886763	0.7623156741245547	0.7955266120427327	0.0281213725490196
e-type_smote_yeo_1000.csv	mlp_11	0.7236559139784946	0.0136277331781038	0.706734848314116	0.7405769796428732	0.7578709285334199	0.0141454545327012	0.7403070269019364	0.7754348301649033
e-type_flow_yeo_100.csv	svm_rbf_auto	0.7225806451612904	0.0109853853450013	0.7089404876720069	0.7362208026505739	0.7790938237700636	0.0154324934223058	0.7599318522850701	0.7982557952550572	0.0219007080433672
e-type_flow_yeo_100.csv	svm_rbf_auto	0.7225806451612904	0.0109853853450013	0.7089404876720069	0.7362208026505739	0.7790938237700636	0.0154324934223058	0.7599318522850701	0.7982557952550572	0.0218461766422481
e-type_flow_yeo_100.csv	SVM_rbf_4	0.7225806451612904	0.0109853853450013	0.7089404876720069	0.7362208026505739	0.7790624587861361	0.0153748193346777	0.7599720991393796	0.7981528184328927
e-type_gan_yeo_100.csv	extra_tree	0.7220430107526882	0.0180928157746922	0.6995778127791196	0.7445082087262568	0.7838336181284973	0.0125093666349208	0.7683011879375847	0.7993660483194098	0.0291535041113219
e-type_flow_yeo_1000.csv	mlp_1	0.7220430107526881	0.009803538993984114	0.7098703093288712	0.7342157121765049	0.7397794033612592	0.008929708531977791	0.7286917057626494	0.7508671009598691	nan
e-type_flow_yeo_1000.csv	mlp_1	0.7220430107526881	0.0098035389939841	0.7098703093288712	0.7342157121765049	0.7397794033612592	0.0089297085319777	0.7286917057626494	0.7508671009598691
e-type_flow_yeo_100.csv	extra_tree	0.721505376344086	0.0163072590194656	0.7012572399102318	0.7417535127779401	0.7768243888926246	0.0178903415609314	0.7546105958608474	0.7990381819244018	0.0280830423782416
e-type_flow_yeo_100.csv	random_forest_4	0.7161290322580646	0.0183899262112764	0.6932949229518988	0.7389631415642304	0.7703597150580067	0.0147727889781084	0.752016874830828	0.7887025552851854
e-type_flow_yeo_100.csv	extra_tree	0.7155913978494624	0.0133599716556872	0.6990028020275727	0.732179993671352	0.7619991847838298	0.0133918730750583	0.7453709781180154	0.7786273914496441	0.0282517267552182
e-type_flow_yeo_1000.csv	mlp_128_64_alpha	0.7150537634408602	0.0318636279331443	0.675489843784115	0.7546176830976055	0.7266930697941355	0.041776888129373	0.6748202118469067	0.7785659277413643	0.02335121384102
e-type_gan_yeo_100.csv	extra_tree_bal	0.713978494623656	0.0174834543457086	0.6922699187983503	0.7356870704489618	0.774958634301605	0.0148791394826199	0.7564837424817836	0.7934335261214265	0.0291950980392156
e-type_vae_yeo_35.csv	extra_tree_bal	0.7128654970760233	0.0088688601684813	0.7018533526997166	0.72387764145233	0.8045488867198282	0.0044367499751538	0.7990399340066481	0.8100578394330082	0.0346314954051796
e-type_flow_yeo_100.csv	random_forest_3	0.7118279569892473	0.0171496106534801	0.6905339028576092	0.7331220111208854	0.7658605968480776	0.0112114888515646	0.7519396947748269	0.7797814989213283
e-type_flow_yeo_100.csv	extra_tree_bal	0.7102150537634409	0.0141480616848825	0.692647914924956	0.7277821926019257	0.7608446799337738	0.0166283231434982	0.7401978897359935	0.7814914701315541	0.0285455091714105
e-type_vae_yeo_35.csv	extra_tree	0.7099415204678363	0.0112106956214507	0.6960216033198603	0.7238614376158123	0.7982373776699728	0.0127113438729159	0.7824541596141851	0.8140205957257606	0.034645313283208
e-type_gan_yeo_100.csv	random_forest_5	0.7096774193548387	0.008500746398302087	0.6991223485942067	0.7202324901154707	0.7786586050343851	0.010183598977847342	0.7660139968114474	0.7913032132573228	nan
e-type_gan_yeo_100.csv	random_forest_5	0.7096774193548387	0.008500746398302	0.6991223485942067	0.7202324901154707	0.7786586050343851	0.0101835989778473	0.7660139968114474	0.7913032132573228
e-type_smote_yeo_2000.csv	lda	0.7091397849462366	0.0022490860928335	0.7063471757159044	0.7119323941765688	0.7838353158139519	0.0022146720925366	0.7810854372088226	0.7865851944190813	0.0299427790108224
e-type_ddpm_yeo_35.csv	lda	0.7087719298245614	0.0147073407484903	0.6905103543078457	0.7270335053412771	0.8037949898783523	0.0057987742829423	0.796594860617513	0.8109951191391916	0.0356296679164848
e-type_ddpm_yeo_35.csv	lda	0.7087719298245614	0.0147073407484903	0.6905103543078457	0.7270335053412771	0.8037949898783523	0.0057987742829423	0.796594860617513	0.8109951191391916	0.0356296679164848
e-type_vae_yeo_35.csv	lda	0.7087719298245614	0.0147073407484903	0.6905103543078457	0.7270335053412771	0.8037949898783523	0.0057987742829423	0.796594860617513	0.8109951191391916	0.0356296679164848
e-type_gan_yeo_100.csv	random_forest_2	0.7086021505376344	0.01527771208428259	0.6896323654676582	0.7275719356076107	0.7753016362181765	0.01551194267494791	0.756041015456493	0.7945622569798599	nan
e-type_gan_yeo_100.csv	random_forest_2	0.7086021505376344	0.0152777120842825	0.6896323654676582	0.7275719356076107	0.7753016362181765	0.0155119426749479	0.756041015456493	0.7945622569798599
e-type_ddpm_yeo_35.csv	extra_tree	0.708187134502924	0.0121265738908348	0.6931300042811166	0.7232442647247315	0.800899420674391	0.003541075933493	0.796502594172867	0.8052962471759151	0.0347416457811194
e-type_ddpm_yeo_35.csv	logistic_l2_2	0.7076023391812865	0.0074547068912175	0.6983460980173001	0.7168585803452728	0.7926785799073526	0.0086861916976845	0.7818932483948412	0.803463911419864	0.0298789568930034
e-type_ddpm_yeo_35.csv	logistic_l2_2	0.7076023391812865	0.0074547068912175	0.6983460980173001	0.7168585803452728	0.7926785799073526	0.0086861916976845	0.7818932483948412	0.803463911419864	0.0298790334414483
e-type_vae_yeo_35.csv	logistic_l2_2	0.7076023391812865	0.0074547068912175	0.6983460980173001	0.7168585803452728	0.7926785799073526	0.0086861916976845	0.7818932483948412	0.803463911419864	0.0298786672615994
e-type_ddpm_yeo_35.csv	logistic_regression_2	0.7076023391812865	0.007454706891217538	0.6983460980173001	0.7168585803452728	0.7922342397245922	0.008468011631966955	0.7817198145448081	0.8027486649043762	nan
e-type_ddpm_yeo_35.csv	logistic_regression_2	0.7076023391812865	0.007454706891217538	0.6983460980173001	0.7168585803452728	0.7922342397245922	0.008468011631966955	0.7817198145448081	0.8027486649043762	nan
e-type_ddpm_yeo_35.csv	logistic_regression_2	0.7076023391812865	0.007454706891217538	0.6983460980173001	0.7168585803452728	0.7922342397245922	0.008468011631966955	0.7817198145448081	0.8027486649043762	nan
e-type_ddpm_yeo_35.csv	logistic_regression_2	0.7076023391812865	0.007454706891217538	0.6983460980173001	0.7168585803452728	0.7922342397245922	0.008468011631966955	0.7817198145448081	0.8027486649043762	nan
e-type_ddpm_yeo_35.csv	logistic_regression_2	0.7076023391812865	0.007454706891217538	0.6983460980173001	0.7168585803452728	0.7922342397245922	0.008468011631966955	0.7817198145448081	0.8027486649043762	nan
e-type_ddpm_yeo_35.csv	logistic_regression_2	0.7076023391812865	0.007454706891217538	0.6983460980173001	0.7168585803452728	0.7922342397245922	0.008468011631966955	0.7817198145448081	0.8027486649043762	nan
e-type_gan_yeo_1000.csv	mlp_128_64	0.706989247311828	0.0143509116290743	0.6891702370006026	0.7248082576230533	0.7276902507989278	0.0154068924053659	0.7085600671749859	0.7468204344228697	0.0283444167840019
e-type_gan_yeo_1000.csv	mlp_128_64_alpha	0.706989247311828	0.008500746398302	0.696434176551196	0.71754431807246	0.7302759659989781	0.0099052063383618	0.7179770278938545	0.7425749041041018	0.0288174172457617
e-type_smote_yeo_1000.csv	lda	0.7043010752688172	0.0032923249230956	0.7002131139414204	0.7083890365962141	0.7818706487602649	0.0019326068641593	0.7794710003943568	0.784270297126173	0.0298313222267501
e-type_flow_yeo_100.csv	SVM_rbf_5	0.7043010752688172	0.0050291093908251	0.6980566111952011	0.7105455393424334	0.7598347141358419	0.0145036784111058	0.7418260188112467	0.7778434094604372
e-type_ddpm_yeo_35.csv	logistic_l1_1	0.7040935672514621	0.0108226640487261	0.6906554549375046	0.7175316795654196	0.7866424257062852	0.0060823799617854	0.7790901534843402	0.7941946979282302	0.029912688122725
e-type_ddpm_yeo_35.csv	logistic_l1_balanced_1	0.7040935672514621	0.0108226640487261	0.6906554549375046	0.7175316795654196	0.7866424257062852	0.0060823799617854	0.7790901534843402	0.7941946979282302	0.0299117358794139
e-type_ddpm_yeo_35.csv	logistic_l1_1	0.7040935672514621	0.0108226640487261	0.6906554549375046	0.7175316795654196	0.7866424257062852	0.0060823799617854	0.7790901534843402	0.7941946979282302	0.0299125524681402
e-type_ddpm_yeo_35.csv	logistic_l1_balanced_1	0.7040935672514621	0.0108226640487261	0.6906554549375046	0.7175316795654196	0.7866424257062852	0.0060823799617854	0.7790901534843402	0.7941946979282302	0.0299115518915637
e-type_vae_yeo_35.csv	logistic_l1_1	0.7040935672514621	0.0108226640487261	0.6906554549375046	0.7175316795654196	0.7866424257062852	0.0060823799617854	0.7790901534843402	0.7941946979282302	0.0299123693978058
e-type_vae_yeo_35.csv	logistic_l1_balanced_1	0.7040935672514621	0.0108226640487261	0.6906554549375046	0.7175316795654196	0.7866424257062852	0.0060823799617854	0.7790901534843402	0.7941946979282302	0.02991226537401
e-type_ddpm_yeo_35.csv	extra_tree_bal	0.704093567251462	0.0129779772053638	0.6879792801860526	0.7202078543168714	0.7991760980407935	0.0142953845908143	0.7814260336539024	0.8169261624276846	0.0345003759398496
e-type_ddpm_yeo_35.csv	extra_tree_bal	0.7040935672514619	0.015935001863671	0.6843076491260317	0.7238794853768921	0.7961061923397261	0.0095858807393032	0.7842037493346583	0.808008635344794	0.0346934419381787
e-type_gan_yeo_100.csv	random_forest_1	0.7037634408602151	0.006958160809432673	0.6951237430894303	0.712403138631	0.7713176626491829	0.012198355345747914	0.7561714039790712	0.7864639213192945	nan
e-type_gan_yeo_100.csv	random_forest_1	0.7037634408602151	0.0069581608094326	0.6951237430894303	0.712403138631	0.7713176626491829	0.0121983553457479	0.7561714039790712	0.7864639213192945
e-type_ddpm_yeo_35.csv	rf_bal_100_10	0.7035087719298245	0.0106634985548599	0.690268289679357	0.716749254180292	0.801192695597736	0.0115819450444863	0.7868118114068228	0.8155735797886492	0.0345746509340603
e-type_smote_yeo_5000.csv	lda	0.703225806451613	0.0024043741693546	0.7002403816073143	0.7062112312959118	0.7776460951215286	0.002650425402722	0.7743551573190439	0.7809370329240133	0.0301060783584847
e-type_smote_yeo_10000.csv	lda	0.7026881720430107	0.0014723724664117	0.7008599801595208	0.7045163639265006	0.7779737813905895	0.0019446111635645	0.7755592277182863	0.7803883350628926	0.0302299023710817
e-type_gan_yeo_1000.csv	mlp_4	0.7021505376344086	0.02323364563046443	0.6733021563080367	0.7309989189607805	0.7229728741446403	0.024280294646847167	0.6928249064158706	0.75312084187341	nan
e-type_gan_yeo_1000.csv	mlp_4	0.7021505376344086	0.0232336456304644	0.6733021563080367	0.7309989189607805	0.7229728741446403	0.0242802946468471	0.6928249064158706	0.75312084187341
e-type_ddpm_yeo_35.csv	logistic_regression_4	0.7017543859649124	0.007454706891217505	0.6924981448009261	0.7110106271288986	0.7821564271875256	0.006129303687543038	0.7745458914646459	0.7897669629104054	nan
e-type_ddpm_yeo_35.csv	logistic_regression_4	0.7017543859649124	0.007454706891217505	0.6924981448009261	0.7110106271288986	0.7821564271875256	0.006129303687543038	0.7745458914646459	0.7897669629104054	nan
e-type_ddpm_yeo_35.csv	logistic_regression_4	0.7017543859649124	0.007454706891217505	0.6924981448009261	0.7110106271288986	0.7821564271875256	0.006129303687543038	0.7745458914646459	0.7897669629104054	nan
e-type_ddpm_yeo_35.csv	logistic_regression_4	0.7017543859649124	0.007454706891217505	0.6924981448009261	0.7110106271288986	0.7821564271875256	0.006129303687543038	0.7745458914646459	0.7897669629104054	nan
e-type_ddpm_yeo_35.csv	logistic_regression_4	0.7017543859649124	0.007454706891217505	0.6924981448009261	0.7110106271288986	0.7821564271875256	0.006129303687543038	0.7745458914646459	0.7897669629104054	nan
e-type_ddpm_yeo_35.csv	logistic_regression_4	0.7017543859649124	0.007454706891217505	0.6924981448009261	0.7110106271288986	0.7821564271875256	0.006129303687543038	0.7745458914646459	0.7897669629104054	nan
e-type_flow_yeo_1000.csv	lda	0.7016129032258065	0.010752688172043	0.6882616774386693	0.7149641290129437	0.7211261135443643	0.0116979547170946	0.70660118431953	0.7356510427691986	0.0230727359967776
e-type_flow_yeo_1000.csv	mlp_128_64_es	0.7016129032258065	0.0232802527899042	0.6727066514674995	0.7305191549841135	0.7130458665470174	0.050901549834479	0.64984324466477	0.7762484884292649	0.0249845385436544
e-type_gan_yeo_100.csv	SVM_rbf_1	0.7016129032258064	0.011717470278335177	0.687063742231175	0.7161620642204378	0.7882316732342834	0.008779887221304593	0.7773300033633003	0.7991333431052666	nan
e-type_gan_yeo_100.csv	SVM_rbf_1	0.7016129032258064	0.0117174702783351	0.687063742231175	0.7161620642204378	0.7882316732342834	0.0087798872213045	0.7773300033633003	0.7991333431052666
e-type_ddpm_yeo_35.csv	rf_100_10	0.7005847953216375	0.0086739163591762	0.6898147056550177	0.7113548849882574	0.7980538030208643	0.0095279629650587	0.786223274430932	0.8098843316107965	0.0346238830577454
e-type_gan_yeo_100.csv	svm_rbf_1	0.7005376344086022	0.0098035389939841	0.6883649329847853	0.712710335832419	0.7861954264614812	0.0099572028015154	0.7738319262200257	0.7985589267029367	0.0234140540006475
e-type_gan_yeo_100.csv	svm_rbf_bal	0.7005376344086022	0.0098035389939841	0.6883649329847853	0.712710335832419	0.7861954264614812	0.0099572028015154	0.7738319262200257	0.7985589267029367	0.023243434966403
e-type_gan_yeo_1000.csv	svm_poly_3	0.7	0.0075076559375101	0.6906780139114929	0.709321986088507	0.7634325254748779	0.0097568828854931	0.7513177552612705	0.7755472956884853	0.0264157684526514
e-type_gan_yeo_100.csv	svm_rbf_auto	0.699462365591398	0.0109853853450013	0.6858222081021145	0.7131025230806814	0.7854150782691545	0.0100220790585947	0.7729710235149454	0.7978591330233635	0.0234339680910291
e-type_gan_yeo_1000.csv	mlp_128_64_es	0.699462365591398	0.0095798546673147	0.6875674049429689	0.7113573262398271	0.7324194478271672	0.0159143832088217	0.7126591311431547	0.7521797645111796	0.0261093150478241
e-type_gan_yeo_1000.csv	mlp_8	0.6994623655913978	0.014148061684882566	0.681895226752913	0.7170295044298827	0.7231371203814553	0.007895062960829816	0.7133341049394408	0.7329401358234697	nan
e-type_gan_yeo_1000.csv	mlp_8	0.6994623655913978	0.0141480616848825	0.681895226752913	0.7170295044298827	0.7231371203814553	0.0078950629608298	0.7133341049394408	0.7329401358234697
e-type_ddpm_yeo_35.csv	extra_tree	0.6994152046783626	0.0124741105308196	0.6839265507226294	0.7149038586340958	0.7930995963429428	0.0082562194031938	0.7828481459487256	0.80335104673716	0.0345341102756892
e-type_gan_yeo_100.csv	SVM_rbf_5	0.6989247311827957	0.001900824680608997	0.6965645456099864	0.7012849167556051	0.7660911971471082	0.010070383469714167	0.7535871645446578	0.7785952297495585	nan
e-type_gan_yeo_100.csv	SVM_rbf_5	0.6989247311827957	0.0019008246806089	0.6965645456099864	0.7012849167556051	0.7660911971471082	0.0100703834697141	0.7535871645446578	0.7785952297495585
e-type_smote_yeo_1000.csv	gaussian_nb	0.6989247311827957	0.0032923249230956	0.6948367698553989	0.7030126925101926	0.75853921093821	0.0037361059709455	0.7539002226606129	0.7631781992158071	0.0328046576429947
e-type_gan_yeo_1000.csv	rf_200_10	0.6983870967741936	0.0083722642486007	0.6879915576732576	0.7087826358751297	0.6937780357685112	0.0280590656557253	0.6589381041205612	0.7286179674164611	0.0373597959565671
e-type_vae_yeo_35.csv	rf_200_20	0.6982456140350877	0.013303290252722	0.6817273974706276	0.7147638305995477	0.7970887918834617	0.0086225309743805	0.7863825055991766	0.8077950781677469	0.0340789223057644
e-type_vae_yeo_35.csv	rf_bal_200_20	0.6982456140350877	0.0123015695719079	0.6829711979762506	0.7135200300939247	0.8004645809158912	0.0097257785008997	0.7883884318968198	0.8125407299349626	0.0342618859649122
e-type_ddpm_yeo_35.csv	SVM_rbf_2	0.6982456140350877	0.006980898471528261	0.6895776837278753	0.7069135443423	0.7873126816359555	0.006496358573051175	0.7792463870763754	0.7953789761955355	nan
e-type_ddpm_yeo_35.csv	SVM_rbf_2	0.6982456140350877	0.006980898471528261	0.6895776837278753	0.7069135443423	0.7873126816359555	0.006496358573051175	0.7792463870763754	0.7953789761955355	nan
e-type_ddpm_yeo_35.csv	SVM_rbf_2	0.6982456140350877	0.006980898471528261	0.6895776837278753	0.7069135443423	0.7873126816359555	0.006496358573051175	0.7792463870763754	0.7953789761955355	nan
e-type_ddpm_yeo_35.csv	SVM_rbf_2	0.6982456140350877	0.006980898471528261	0.6895776837278753	0.7069135443423	0.7873126816359555	0.006496358573051175	0.7792463870763754	0.7953789761955355	nan
e-type_ddpm_yeo_35.csv	SVM_rbf_2	0.6982456140350877	0.006980898471528261	0.6895776837278753	0.7069135443423	0.7873126816359555	0.006496358573051175	0.7792463870763754	0.7953789761955355	nan
e-type_ddpm_yeo_35.csv	SVM_rbf_2	0.6982456140350877	0.006980898471528261	0.6895776837278753	0.7069135443423	0.7873126816359555	0.006496358573051175	0.7792463870763754	0.7953789761955355	nan
e-type_ddpm_yeo_35.csv	mlp_4	0.6982456140350877	0.008372994773845817	0.687849167867255	0.7086420602029203	0.7860380506450635	0.00701869152834537	0.7773231940598193	0.7947529072303077	nan
e-type_smote_yeo_2000.csv	gaussian_nb	0.6978494623655915	0.0030649877018794	0.6940437774812306	0.7016551472499525	0.7605517529977428	0.0026855720369532	0.7572171748848753	0.7638863311106103	0.0330861187307494
e-type_ddpm_yeo_35.csv	SVM_linear_3	0.6976608187134502	0.01198473773796442	0.6827798013363058	0.7125418360905946	0.7792718631911557	0.015037476628894023	0.7606003698372275	0.797943356545084	nan
e-type_ddpm_yeo_35.csv	SVM_linear_6	0.6976608187134502	0.01198473773796442	0.6827798013363058	0.7125418360905946	0.7792718631911557	0.015037476628894023	0.7606003698372275	0.797943356545084	nan
e-type_ddpm_yeo_35.csv	SVM_linear_3	0.6976608187134502	0.01198473773796442	0.6827798013363058	0.7125418360905946	0.7792718631911557	0.015037476628894023	0.7606003698372275	0.797943356545084	nan
e-type_ddpm_yeo_35.csv	SVM_linear_6	0.6976608187134502	0.01198473773796442	0.6827798013363058	0.7125418360905946	0.7792718631911557	0.015037476628894023	0.7606003698372275	0.797943356545084	nan
e-type_ddpm_yeo_35.csv	SVM_linear_3	0.6976608187134502	0.01198473773796442	0.6827798013363058	0.7125418360905946	0.7792718631911557	0.015037476628894023	0.7606003698372275	0.797943356545084	nan
e-type_ddpm_yeo_35.csv	SVM_linear_6	0.6976608187134502	0.01198473773796442	0.6827798013363058	0.7125418360905946	0.7792718631911557	0.015037476628894023	0.7606003698372275	0.797943356545084	nan
e-type_ddpm_yeo_35.csv	SVM_linear_3	0.6976608187134502	0.01198473773796442	0.6827798013363058	0.7125418360905946	0.7792718631911557	0.015037476628894023	0.7606003698372275	0.797943356545084	nan
e-type_ddpm_yeo_35.csv	SVM_linear_6	0.6976608187134502	0.01198473773796442	0.6827798013363058	0.7125418360905946	0.7792718631911557	0.015037476628894023	0.7606003698372275	0.797943356545084	nan
e-type_ddpm_yeo_35.csv	SVM_linear_3	0.6976608187134502	0.01198473773796442	0.6827798013363058	0.7125418360905946	0.7792718631911557	0.015037476628894023	0.7606003698372275	0.797943356545084	nan
e-type_ddpm_yeo_35.csv	SVM_linear_6	0.6976608187134502	0.01198473773796442	0.6827798013363058	0.7125418360905946	0.7792718631911557	0.015037476628894023	0.7606003698372275	0.797943356545084	nan
e-type_ddpm_yeo_35.csv	SVM_linear_3	0.6976608187134502	0.01198473773796442	0.6827798013363058	0.7125418360905946	0.7792718631911557	0.015037476628894023	0.7606003698372275	0.797943356545084	nan
e-type_ddpm_yeo_35.csv	SVM_linear_6	0.6976608187134502	0.01198473773796442	0.6827798013363058	0.7125418360905946	0.7792718631911557	0.015037476628894023	0.7606003698372275	0.797943356545084	nan
e-type_gan_yeo_100.csv	SVM_rbf_4	0.6973118279569892	0.010341604334231928	0.6844710301715053	0.7101526257424731	0.7829945874189216	0.009728942361321833	0.7709145099482687	0.7950746648895745	nan
e-type_gan_yeo_100.csv	SVM_rbf_4	0.6973118279569892	0.0103416043342319	0.6844710301715053	0.7101526257424731	0.7829945874189216	0.0097289423613218	0.7709145099482687	0.7950746648895745
e-type_ddpm_yeo_35.csv	rf_200_20	0.6970760233918128	0.0154168728964492	0.6779334473514085	0.7162185994322172	0.7976607649729736	0.0117481448370431	0.7830735164831336	0.8122480134628135	0.0343100981620718
e-type_ddpm_yeo_35.csv	logistic_regression_1	0.6970760233918128	0.01821334678642974	0.6744611664003027	0.719690880383323	0.7780168151600131	0.010181907639638848	0.7653743070108376	0.7906593233091885	nan
e-type_ddpm_yeo_35.csv	logistic_regression_1	0.6970760233918128	0.01821334678642974	0.6744611664003027	0.719690880383323	0.7780168151600131	0.010181907639638848	0.7653743070108376	0.7906593233091885	nan
e-type_ddpm_yeo_35.csv	logistic_regression_1	0.6970760233918128	0.01821334678642974	0.6744611664003027	0.719690880383323	0.7780168151600131	0.010181907639638848	0.7653743070108376	0.7906593233091885	nan
e-type_ddpm_yeo_35.csv	logistic_regression_1	0.6970760233918128	0.01821334678642974	0.6744611664003027	0.719690880383323	0.7780168151600131	0.010181907639638848	0.7653743070108376	0.7906593233091885	nan
e-type_ddpm_yeo_35.csv	logistic_regression_1	0.6970760233918128	0.01821334678642974	0.6744611664003027	0.719690880383323	0.7780168151600131	0.010181907639638848	0.7653743070108376	0.7906593233091885	nan
e-type_ddpm_yeo_35.csv	logistic_regression_1	0.6970760233918128	0.01821334678642974	0.6744611664003027	0.719690880383323	0.7780168151600131	0.010181907639638848	0.7653743070108376	0.7906593233091885	nan
e-type_ddpm_yeo_35.csv	rf_bal_100_10	0.6970760233918127	0.0118050463381206	0.6824181223566411	0.7117339244269844	0.7956613742558188	0.0084371032713407	0.7851853268746678	0.8061374216369699	0.0345757047617629
e-type_gan_yeo_100.csv	SVM_rbf_2	0.6967741935483872	0.005170802167115948	0.6903537946556453	0.7031945924411291	0.7640598280441677	0.011380175921000085	0.7499294733098365	0.7781901827784989	nan
e-type_gan_yeo_100.csv	SVM_rbf_2	0.6967741935483872	0.0051708021671159	0.6903537946556453	0.7031945924411291	0.7640598280441677	0.011380175921	0.7499294733098365	0.7781901827784989
e-type_gan_yeo_100.csv	svm_rbf_2	0.6967741935483872	0.0044171173992352	0.6912896178979174	0.702258769198857	0.7652994531228232	0.0048980505107641	0.7592177201422239	0.7713811861034225	0.0245229666335747
e-type_ddpm_yeo_35.csv	SVM_rbf_5	0.6964912280701754	0.005624381304582283	0.6895076362921052	0.7034748198482456	0.7858818223945356	0.002282034783379457	0.7830483019613647	0.7887153428277066	nan
e-type_ddpm_yeo_35.csv	SVM_rbf_5	0.6964912280701754	0.005624381304582283	0.6895076362921052	0.7034748198482456	0.7858818223945356	0.002282034783379457	0.7830483019613647	0.7887153428277066	nan
e-type_ddpm_yeo_35.csv	SVM_rbf_5	0.6964912280701754	0.005624381304582283	0.6895076362921052	0.7034748198482456	0.7858818223945356	0.002282034783379457	0.7830483019613647	0.7887153428277066	nan
e-type_ddpm_yeo_35.csv	SVM_rbf_5	0.6964912280701754	0.005624381304582283	0.6895076362921052	0.7034748198482456	0.7858818223945356	0.002282034783379457	0.7830483019613647	0.7887153428277066	nan
e-type_ddpm_yeo_35.csv	SVM_rbf_5	0.6964912280701754	0.005624381304582283	0.6895076362921052	0.7034748198482456	0.7858818223945356	0.002282034783379457	0.7830483019613647	0.7887153428277066	nan
e-type_ddpm_yeo_35.csv	SVM_rbf_5	0.6964912280701754	0.005624381304582283	0.6895076362921052	0.7034748198482456	0.7858818223945356	0.002282034783379457	0.7830483019613647	0.7887153428277066	nan
e-type_ddpm_yeo_35.csv	logistic_l2_balanced_1	0.695906432748538	0.0183769080262814	0.6730884876540025	0.7187243778430735	0.7766812436873701	0.0107767655861025	0.7633001218420253	0.7900623655327149	0.0313938722819006
e-type_ddpm_yeo_35.csv	rf_200_10	0.695906432748538	0.010128952091046	0.6833296775975554	0.7084831878995207	0.7987045771616338	0.004819767514147	0.7927200453596054	0.8046891089636622	0.0343565746482575
e-type_ddpm_yeo_35.csv	SVM_rbf_1	0.6953216374269007	0.009564577329705337	0.6834456460985696	0.7071976287552317	0.798886437124015	0.005358229024180002	0.7922333170505602	0.8055395571974697	nan
e-type_ddpm_yeo_35.csv	SVM_rbf_1	0.6953216374269007	0.009564577329705337	0.6834456460985696	0.7071976287552317	0.798886437124015	0.005358229024180002	0.7922333170505602	0.8055395571974697	nan
e-type_ddpm_yeo_35.csv	SVM_rbf_1	0.6953216374269007	0.009564577329705337	0.6834456460985696	0.7071976287552317	0.798886437124015	0.005358229024180002	0.7922333170505602	0.8055395571974697	nan
e-type_ddpm_yeo_35.csv	SVM_rbf_1	0.6953216374269007	0.009564577329705337	0.6834456460985696	0.7071976287552317	0.798886437124015	0.005358229024180002	0.7922333170505602	0.8055395571974697	nan
e-type_ddpm_yeo_35.csv	SVM_rbf_1	0.6953216374269007	0.009564577329705337	0.6834456460985696	0.7071976287552317	0.798886437124015	0.005358229024180002	0.7922333170505602	0.8055395571974697	nan
e-type_ddpm_yeo_35.csv	SVM_rbf_1	0.6953216374269007	0.009564577329705337	0.6834456460985696	0.7071976287552317	0.798886437124015	0.005358229024180002	0.7922333170505602	0.8055395571974697	nan
e-type_ddpm_yeo_35.csv	logistic_l2_1	0.6953216374269006	0.0174706073056019	0.6736290133087789	0.7170142615450222	0.7764762575377857	0.0103701969238196	0.7635999573631953	0.7893525577123761	0.0313937318771078
e-type_ddpm_yeo_35.csv	logistic_l2_1	0.6953216374269006	0.0174706073056019	0.6736290133087789	0.7170142615450222	0.7762639211412388	0.0105947446099606	0.7631088081888873	0.7894190340935903	0.0313926824257708
e-type_ddpm_yeo_35.csv	logistic_l2_balanced_1	0.6953216374269006	0.0174706073056019	0.6736290133087789	0.7170142615450222	0.7764762575377857	0.0103701969238196	0.7635999573631953	0.7893525577123761	0.031393535761685
e-type_ddpm_yeo_35.csv	rf_bal_200_20	0.6953216374269006	0.0139311453211363	0.6780238358279007	0.7126194390259004	0.7940395750052591	0.0075482434683532	0.7846671928409282	0.80341195716959	0.0344267000835421
e-type_vae_yeo_35.csv	logistic_l2_1	0.6953216374269006	0.0174706073056019	0.6736290133087789	0.7170142615450222	0.7764762575377857	0.0103701969238196	0.7635999573631953	0.7893525577123761	0.0313952062915606
e-type_vae_yeo_35.csv	logistic_l2_balanced_1	0.6953216374269006	0.0174706073056019	0.6736290133087789	0.7170142615450222	0.7764762575377857	0.0103701969238196	0.7635999573631953	0.7893525577123761	0.0313934460241176
e-type_smote_yeo_10000.csv	gaussian_nb	0.6951612903225807	0.0014723724664117	0.6933330984390907	0.6969894822060706	0.7565384638051696	0.0021784126664506	0.7538336072240067	0.7592433203863326	0.0333192879165031
e-type_ddpm_yeo_35.csv	rf_200_10	0.6947368421052631	0.0191291546594106	0.6709848594486011	0.7184888247619251	0.798657415419181	0.006607969500293	0.7904525375894387	0.8068622932489233	0.034478652951171
e-type_vae_yeo_35.csv	rf_100_10	0.6947368421052631	0.0189043624271866	0.6712639758704294	0.7182097083400968	0.79638170871537	0.0088087977288371	0.7854441417080138	0.8073192757227261	0.0345579085016903
e-type_flow_yeo_100.csv	mlp_2	0.6946236559139786	0.0114995965786061	0.680345020848456	0.7089022909795011	0.7561165798980959	0.0131376395968737	0.7398040457892815	0.7724291140069103
e-type_ddpm_yeo_35.csv	rf_100_20	0.6935672514619884	0.0149666478269821	0.67498370368143	0.7121507992425468	0.8028122079572378	0.008128440404773	0.7927194161450863	0.8129049997693893	0.0346902172096908
e-type_ddpm_yeo_35.csv	rf_200_20	0.6935672514619884	0.0104201927960265	0.68062887321282	0.7065056297111568	0.7962395122458047	0.0056095160862882	0.7892743780741157	0.8032046464174937	0.0345342585630743
e-type_ddpm_yeo_35.csv	svm_rbf_2	0.6935672514619883	0.0078458525526308	0.6838253388121714	0.7033091641118051	0.7823408733755063	0.0074559374625669	0.7730831042553781	0.7915986424956345	0.0309469249684325
e-type_ddpm_yeo_35.csv	mlp_128_64	0.6935672514619883	0.0088688601684813	0.6825551070856816	0.704579395838295	0.7790013277670577	0.0051059724951885	0.7726614255439634	0.7853412299901519	0.0357501849324176
e-type_ddpm_yeo_35.csv	svm_rbf_2	0.6935672514619883	0.0078458525526308	0.6838253388121714	0.7033091641118051	0.7823408733755063	0.0074559374625669	0.7730831042553781	0.7915986424956345	0.030706340692962
e-type_vae_yeo_35.csv	svm_rbf_2	0.6935672514619883	0.0078458525526308	0.6838253388121714	0.7033091641118051	0.7823408733755063	0.0074559374625669	0.7730831042553781	0.7915986424956345	0.0308577081240097
e-type_ddpm_yeo_35.csv	random_forest_5	0.6935672514619883	0.006339030230607834	0.6856963058411172	0.7014381970828594	0.8106356647095879	0.010034423241695319	0.7981762826276357	0.8230950467915401	nan
e-type_ddpm_yeo_35.csv	random_forest_5	0.6935672514619883	0.006339030230607834	0.6856963058411172	0.7014381970828594	0.8106356647095879	0.010034423241695319	0.7981762826276357	0.8230950467915401	nan
e-type_ddpm_yeo_35.csv	mlp_2	0.6935672514619883	0.022017369119317762	0.666229076891368	0.7209054260326085	0.7848602529728186	0.02014856883552058	0.7598425004344223	0.8098780055112149	nan
e-type_smote_yeo_5000.csv	gaussian_nb	0.6935483870967742	0.0026881720430107	0.69021058064999	0.6968861935435585	0.7552995511992765	0.002975888666821	0.7516044973790222	0.7589946050195308	0.0335999338869435
e-type_flow_yeo_100.csv	mlp_4	0.69247311827957	0.0178920013895632	0.6702572642983377	0.7146889722608024	0.7579710212669258	0.0177612678170038	0.7359174944560969	0.7800245480777548
e-type_gan_yeo_1000.csv	random_forest_5	0.6924731182795699	0.019990314454385198	0.6676518645087874	0.7172943720503524	0.660219875623919	0.03967870759117907	0.6109522529126975	0.7094874983351406	nan
e-type_gan_yeo_1000.csv	random_forest_5	0.6924731182795699	0.0199903144543851	0.6676518645087874	0.7172943720503524	0.660219875623919	0.039678707591179	0.6109522529126975	0.7094874983351406
e-type_ddpm_yeo_35.csv	rf_100_10	0.6923976608187135	0.0129779772053638	0.676283373753304	0.7085119478841229	0.796438407383109	0.0119335636373573	0.7816209310443287	0.8112558837218893	0.0347085408571131
e-type_vae_yeo_35.csv	rf_200_10	0.6923976608187135	0.0106233345757806	0.6792070487350933	0.7055882729023336	0.7939381837856443	0.0093984687019086	0.7822684435602394	0.8056079240110492	0.0344446248498526
e-type_gan_yeo_1000.csv	mlp_100_lr0.001	0.6919354838709678	0.0220528433354771	0.664553262243278	0.7193177054986576	0.720059509339319	0.0221692069631569	0.6925328031844387	0.7475862154941992	0.0300900056437991
e-type_gan_yeo_1000.csv	random_forest_3	0.6919354838709676	0.017170666045883173	0.6706152860166147	0.7132556817253205	0.6689654403687104	0.033004511954353374	0.627984926096704	0.7099459546407169	nan
e-type_gan_yeo_1000.csv	random_forest_3	0.6919354838709676	0.0171706660458831	0.6706152860166147	0.7132556817253205	0.6689654403687104	0.0330045119543533	0.627984926096704	0.7099459546407169
e-type_gan_yeo_100.csv	random_forest_3	0.6913978494623656	0.020152327756979938	0.6663754296065212	0.71642026931821	0.7580418067931713	0.02098890750647715	0.7319806359807499	0.7841029776055928	nan
e-type_gan_yeo_100.csv	random_forest_3	0.6913978494623656	0.0201523277569799	0.6663754296065212	0.71642026931821	0.7580418067931713	0.0209889075064771	0.7319806359807499	0.7841029776055928
e-type_ddpm_yeo_35.csv	mlp_1	0.6912280701754386	0.01499518292977552	0.6726090913850566	0.7098470489658206	0.7801094502476751	0.011673453742185492	0.7656149430013063	0.7946039574940439	nan
e-type_gan_yeo_1000.csv	random_forest_1	0.6908602150537635	0.015324938509397056	0.6718317906319586	0.7098886394755684	0.6645612847072093	0.03443558775437475	0.6218038551356158	0.7073187142788029	nan
e-type_gan_yeo_1000.csv	random_forest_1	0.6908602150537635	0.015324938509397	0.6718317906319586	0.7098886394755684	0.6645612847072093	0.0344355877543747	0.6218038551356158	0.7073187142788029
e-type_flow_yeo_100.csv	mlp_128_64	0.6908602150537634	0.0146005114129035	0.6727312856769978	0.708989144430529	0.749459152461057	0.0175101509882462	0.7277174283758395	0.7712008765462744	0.0240067488482139
e-type_flow_yeo_100.csv	mlp_3	0.6908602150537634	0.0118706463257095	0.6761208608757201	0.7055995692318067	0.7392259392239959	0.0132765877194808	0.7227408782337224	0.7557110002142695
e-type_flow_yeo_100.csv	mlp_128_64_alpha	0.6903225806451612	0.0193286860346748	0.6663228470633216	0.7143223142270008	0.7519826450431861	0.0168886337925343	0.7310126364841487	0.7729526536022235	0.0243924730494311
e-type_ddpm_yeo_35.csv	rf_100_20	0.6900584795321638	0.015333462692546	0.6710194709390288	0.7090974881252988	0.7922336685990083	0.0103751149395172	0.7793512619013837	0.805116075296633	0.0345850626566416
e-type_ddpm_yeo_35.csv	rf_bal_200_20	0.6900584795321637	0.0115117074181459	0.6757648068731967	0.7043521521911307	0.7974286352997438	0.0034662222749824	0.7931247518911262	0.8017325187083615	0.0344236654135338
e-type_ddpm_yeo_35.csv	mlp_3	0.6900584795321637	0.013557921777040469	0.6732240961711498	0.7068928628931777	0.7815120386598086	0.00650845243063518	0.7734307275926671	0.7895933497269501	nan
e-type_flow_yeo_100.csv	mlp_50x2_lr0.001	0.6897849462365592	0.0204371804395142	0.6644088350600201	0.7151610574130982	0.7521418994743538	0.0153211402902162	0.7331181911645631	0.7711656077841446	0.024685496360083
e-type_vae_yeo_35.csv	rf_bal_100_10	0.6894736842105263	0.0131416403825989	0.6731561824701124	0.7057911859509403	0.7937225472975749	0.0065847115323683	0.7855465480492759	0.8018985465458738	0.0346543218041801
e-type_ddpm_yeo_35.csv	svm_rbf_auto	0.6894736842105262	0.0121265738908349	0.6744165539887187	0.7045308144323338	0.7944777930167722	0.0100675662996411	0.7819772583929784	0.8069783276405661	0.0310520712855194
e-type_ddpm_yeo_35.csv	svm_rbf_auto	0.6894736842105262	0.0121265738908349	0.6744165539887187	0.7045308144323338	0.7944777930167722	0.0100675662996411	0.7819772583929784	0.8069783276405661	0.0307528766929192
e-type_vae_yeo_35.csv	svm_rbf_auto	0.6894736842105262	0.0121265738908349	0.6744165539887187	0.7045308144323338	0.7944777930167722	0.0100675662996411	0.7819772583929784	0.8069783276405661	0.0311157238501959
e-type_ddpm_yeo_35.csv	mlp_100_lr0.001	0.6888888888888889	0.0073391230397726	0.6797761640320155	0.6980016137457623	0.7783260205341911	0.0077746273767444	0.7686725456210382	0.787979495447344	0.0341200389081552
e-type_gan_yeo_100.csv	mlp_4	0.6887096774193548	0.009949868560925718	0.6763552838403939	0.7010640709983158	0.7582805306155277	0.005387020401457933	0.7515916613254482	0.7649693999056072	nan
e-type_gan_yeo_100.csv	mlp_4	0.6887096774193548	0.0099498685609257	0.6763552838403939	0.7010640709983158	0.7582805306155277	0.0053870204014579	0.7515916613254482	0.7649693999056072
e-type_smote_yeo_10000.csv	svm_poly_4	0.6887096774193548	0.0035049475296788	0.6843577102561593	0.6930616445825504	0.7162961964097498	0.0025435436443378	0.7131379698387156	0.7194544229807841	0.0315635910955722
e-type_ddpm_yeo_35.csv	svm_rbf_1	0.6883040935672515	0.0131741290363377	0.67194625183514	0.704661935299363	0.7944298984637616	0.0101136817768062	0.7818721039122117	0.8069876930153114	0.0309437935972077
e-type_ddpm_yeo_35.csv	svm_rbf_bal	0.6883040935672515	0.0131741290363377	0.67194625183514	0.704661935299363	0.7944298984637616	0.0101136817768062	0.7818721039122117	0.8069876930153114	0.0310556144787778
e-type_ddpm_yeo_35.csv	svm_rbf_1	0.6883040935672515	0.0131741290363377	0.67194625183514	0.704661935299363	0.7944298984637616	0.0101136817768062	0.7818721039122117	0.8069876930153114	0.031054718208911
e-type_ddpm_yeo_35.csv	svm_rbf_bal	0.6883040935672515	0.0131741290363377	0.67194625183514	0.704661935299363	0.7944298984637616	0.0101136817768062	0.7818721039122117	0.8069876930153114	0.031017913630679
e-type_vae_yeo_35.csv	svm_rbf_1	0.6883040935672515	0.0131741290363377	0.67194625183514	0.704661935299363	0.7944298984637616	0.0101136817768062	0.7818721039122117	0.8069876930153114	0.0313295357479387
e-type_vae_yeo_35.csv	svm_rbf_bal	0.6883040935672515	0.0131741290363377	0.67194625183514	0.704661935299363	0.7944298984637616	0.0101136817768062	0.7818721039122117	0.8069876930153114	0.0310143390662201
e-type_ddpm_yeo_35.csv	SVM_rbf_4	0.6883040935672515	0.013174129036337787	0.67194625183514	0.704661935299363	0.7937333308318852	0.009436714497916911	0.7820161021784943	0.8054505594852762	nan
e-type_ddpm_yeo_35.csv	SVM_rbf_4	0.6883040935672515	0.013174129036337787	0.67194625183514	0.704661935299363	0.7937333308318852	0.009436714497916911	0.7820161021784943	0.8054505594852762	nan
e-type_ddpm_yeo_35.csv	SVM_rbf_4	0.6883040935672515	0.013174129036337787	0.67194625183514	0.704661935299363	0.7937333308318852	0.009436714497916911	0.7820161021784943	0.8054505594852762	nan
e-type_ddpm_yeo_35.csv	SVM_rbf_4	0.6883040935672515	0.013174129036337787	0.67194625183514	0.704661935299363	0.7937333308318852	0.009436714497916911	0.7820161021784943	0.8054505594852762	nan
e-type_ddpm_yeo_35.csv	SVM_rbf_4	0.6883040935672515	0.013174129036337787	0.67194625183514	0.704661935299363	0.7937333308318852	0.009436714497916911	0.7820161021784943	0.8054505594852762	nan
e-type_ddpm_yeo_35.csv	SVM_rbf_4	0.6883040935672515	0.013174129036337787	0.67194625183514	0.704661935299363	0.7937333308318852	0.009436714497916911	0.7820161021784943	0.8054505594852762	nan
e-type_gan_yeo_100.csv	random_forest_4	0.6881720430107527	0.019291263567751817	0.6642187755588154	0.7121253104626901	0.7592902802756297	0.015905721417832093	0.7395407186256491	0.7790398419256104	nan
e-type_gan_yeo_100.csv	random_forest_4	0.6881720430107527	0.0192912635677518	0.6642187755588154	0.7121253104626901	0.7592902802756297	0.015905721417832	0.7395407186256491	0.7790398419256104
e-type_gan_yeo_10000.csv	mlp_128_64	0.6881720430107527	0.0172126995629915	0.6667996536514884	0.7095444323700171	0.7165676091967785	0.012335543779844	0.7012510085870798	0.7318842098064773	0.0321882186205907
e-type_gan_yeo_1000.csv	mlp_6	0.6881720430107526	0.017524737648394257	0.6664122071947753	0.7099318788267299	0.7113583576488162	0.02015301730792446	0.686335081602389	0.7363816336952433	nan
e-type_gan_yeo_1000.csv	mlp_6	0.6881720430107526	0.0175247376483942	0.6664122071947753	0.7099318788267299	0.7113583576488162	0.0201530173079244	0.686335081602389	0.7363816336952433
e-type_ddpm_yeo_35.csv	mlp_50x2_lr0.001	0.6877192982456141	0.0108226640487261	0.6742811859316565	0.7011574105595716	0.7822125687615015	0.0135967660858443	0.7653299538207106	0.7990951837022924	0.0366364249908145
e-type_vae_yeo_35.csv	mlp_100_lr0.001	0.6877192982456141	0.0169741816066666	0.6666430680456435	0.7087955284455846	0.7725486092727697	0.0139002151670357	0.7552892125325754	0.789808006012964	0.0339714716386718
e-type_ddpm_yeo_35.csv	random_forest_2	0.6877192982456141	0.006980898471528236	0.6790513679384017	0.6963872285528264	0.8044844212300308	0.004219610582968734	0.799245082682719	0.8097237597773427	nan
e-type_ddpm_yeo_35.csv	random_forest_2	0.6877192982456141	0.006980898471528236	0.6790513679384017	0.6963872285528264	0.8044844212300308	0.004219610582968734	0.799245082682719	0.8097237597773427	nan
e-type_ddpm_yeo_35.csv	xgboost	0.6877192982456141	0.014531898993905458	0.6696755624393481	0.70576303405188	0.7874730331292982	0.005561677820604106	0.7805672980098457	0.7943787682487506	0.032148788766699125
e-type_flow_yeo_100.csv	mlp_100_lr0.001	0.6876344086021506	0.0095798546673148	0.6757394479537215	0.6995293692505797	0.7501986324218788	0.0101266745767136	0.7376247051784481	0.7627725596653094	0.0244974260752788
e-type_ddpm_yeo_35.csv	random_forest_1	0.6871345029239766	0.007454706891217526	0.6778782617599902	0.696390744087963	0.803017447482512	0.006091852886822124	0.7954534130705914	0.8105814818944327	nan
e-type_ddpm_yeo_35.csv	random_forest_1	0.6871345029239766	0.007454706891217526	0.6778782617599902	0.696390744087963	0.803017447482512	0.006091852886822124	0.7954534130705914	0.8105814818944327	nan
e-type_ddpm_yeo_35.csv	random_forest_1	0.6871345029239766	0.007454706891217526	0.6778782617599902	0.696390744087963	0.803017447482512	0.006091852886822124	0.7954534130705914	0.8105814818944327	nan
e-type_ddpm_yeo_35.csv	random_forest_1	0.6871345029239766	0.007454706891217526	0.6778782617599902	0.696390744087963	0.803017447482512	0.006091852886822124	0.7954534130705914	0.8105814818944327	nan
e-type_ddpm_yeo_35.csv	random_forest_1	0.6871345029239766	0.007454706891217526	0.6778782617599902	0.696390744087963	0.803017447482512	0.006091852886822124	0.7954534130705914	0.8105814818944327	nan
e-type_smote_yeo_5000.csv	svm_poly_4	0.6865591397849462	0.0014723724664117	0.6847309479014562	0.6883873316684362	0.7116706070878137	0.0021197805276066	0.7090385519225911	0.7143026622530363	0.0309388712916203
e-type_flow_yeo_100.csv	mlp_1	0.685483870967742	0.0032923249230957	0.681395909640345	0.689571832295139	0.7502085113155912	0.0065712619878935	0.7420492118824589	0.7583678107487235
e-type_flow_yeo_10000.csv	mlp_4	0.6854838709677419	0.011404948083654035	0.6713227575308857	0.6996449844045981	0.6962854932890585	0.01189933679055164	0.681510515193729	0.7110604713843881	nan
e-type_flow_yeo_10000.csv	mlp_4	0.6854838709677419	0.011404948083654	0.6713227575308857	0.6996449844045981	0.6962854932890585	0.0118993367905516	0.681510515193729	0.7110604713843881
e-type_gan_yeo_1000.csv	mlp_2	0.6849462365591398	0.021115416007156468	0.6587279846959581	0.7111644884223215	0.7163612606378262	0.01227158218506274	0.7011240788376352	0.7315984424380173	nan
e-type_gan_yeo_1000.csv	mlp_2	0.6849462365591398	0.0211154160071564	0.6587279846959581	0.7111644884223215	0.7163612606378262	0.0122715821850627	0.7011240788376352	0.7315984424380173
e-type_gan_yeo_10000.csv	svm_poly_3	0.6849462365591398	0.0074593746911353	0.6756841995560448	0.6942082735622348	0.7093407045098798	0.0115706709378328	0.6949738189713102	0.7237075900484495	0.0279839034737556
e-type_flow_yeo_1000.csv	mlp_50_lr0.001	0.6849462365591397	0.0193286860346748	0.6609465029773001	0.7089459701409793	0.6900807188302903	0.0228994070554185	0.6616473495093638	0.7185140881512169	0.0252541200785168
e-type_vae_yeo_35.csv	mlp_50x2_lr0.001	0.684795321637427	0.0181898608362523	0.6622096263047157	0.7073810169701382	0.7779272968198949	0.0117590172533008	0.7633265484422144	0.7925280451975755	0.0364701119161777
e-type_gan_yeo_10000.csv	extra_tree_bal	0.6844086021505376	0.0122599508075176	0.6691858626130937	0.6996313416879815	0.7019858542002695	0.0149173796042879	0.683463480998086	0.720508227402453	0.0387020619860847
e-type_flow_yeo_100.csv	mlp_50_lr0.001	0.6838709677419355	0.0256857616894435	0.6519778821857118	0.7157640532981591	0.7469170699094139	0.0222233218416005	0.7193231712582031	0.7745109685606246	0.0247859915598284
e-type_gan_yeo_1000.csv	rf_100_10	0.6838709677419355	0.0086273153418716	0.6731587408807824	0.6945831946030885	0.6481822342862394	0.0060641911079818	0.640652546509231	0.6557119220632479	0.0372399695253314
e-type_gan_yeo_100.csv	mlp_2	0.6833333333333333	0.009949868560925704	0.6709789397543724	0.6956877269122943	0.7619913826825451	0.01279713271311101	0.7461016437124395	0.7778811216526507	nan
e-type_gan_yeo_100.csv	mlp_2	0.6833333333333333	0.0099498685609257	0.6709789397543724	0.6956877269122943	0.7619913826825451	0.012797132713111	0.7461016437124395	0.7778811216526507
e-type_ddpm_yeo_35.csv	mlp_100_lr0.001	0.6830409356725144	0.017495058832341	0.6613179509739397	0.7047639203710891	0.7745023108779049	0.0126553595439651	0.758788606547839	0.7902160152079708	0.0336678394295491
e-type_gan_yeo_1000.csv	rf_bal_100_10	0.682258064516129	0.0188555676524195	0.6588457849964241	0.705670344035834	0.6644583547703174	0.0423512359544923	0.6118723498061914	0.7170443597344435	0.0375850824374809
e-type_ddpm_yeo_35.csv	gaussian_nb	0.6818713450292397	0.0152495962694798	0.6629364703542842	0.7008062197041953	0.7697110430623662	0.0077711628941769	0.7600618698724897	0.7793602162522426	0.0421674456816261
e-type_ddpm_yeo_35.csv	gaussian_nb	0.6818713450292397	0.0152495962694798	0.6629364703542842	0.7008062197041953	0.7697110430623662	0.0077711628941769	0.7600618698724897	0.7793602162522426	0.0421674456816261
e-type_ddpm_yeo_35.csv	mlp_50_lr0.001	0.6818713450292397	0.0024463743465908	0.6788337700769486	0.6849089199815309	0.7759492870005908	0.0141756457408383	0.7583478980329013	0.7935506759682804	0.033682581649205
e-type_vae_yeo_35.csv	gaussian_nb	0.6818713450292397	0.0152495962694798	0.6629364703542842	0.7008062197041953	0.7697110430623662	0.0077711628941769	0.7600618698724897	0.7793602162522426	0.0421674456816261
e-type_ddpm_yeo_35.csv	SVM_linear_2	0.6818713450292397	0.012644297257567053	0.6661713763419321	0.6975713137165473	0.7658399317505797	0.01401547518722888	0.7484374207928794	0.78324244270828	nan
e-type_ddpm_yeo_35.csv	SVM_linear_5	0.6818713450292397	0.012644297257567053	0.6661713763419321	0.6975713137165473	0.7658399317505797	0.01401547518722888	0.7484374207928794	0.78324244270828	nan
e-type_ddpm_yeo_35.csv	logistic_regression_3	0.6818713450292397	0.01139975946761283	0.6677166741101224	0.6960260159483571	0.7625165860317192	0.011091632559711176	0.7487445052010212	0.7762886668624173	nan
e-type_ddpm_yeo_35.csv	SVM_linear_2	0.6818713450292397	0.012644297257567053	0.6661713763419321	0.6975713137165473	0.7658399317505797	0.01401547518722888	0.7484374207928794	0.78324244270828	nan
e-type_ddpm_yeo_35.csv	SVM_linear_5	0.6818713450292397	0.012644297257567053	0.6661713763419321	0.6975713137165473	0.7658399317505797	0.01401547518722888	0.7484374207928794	0.78324244270828	nan
e-type_ddpm_yeo_35.csv	logistic_regression_3	0.6818713450292397	0.01139975946761283	0.6677166741101224	0.6960260159483571	0.7625165860317192	0.011091632559711176	0.7487445052010212	0.7762886668624173	nan
e-type_ddpm_yeo_35.csv	SVM_linear_2	0.6818713450292397	0.012644297257567053	0.6661713763419321	0.6975713137165473	0.7658399317505797	0.01401547518722888	0.7484374207928794	0.78324244270828	nan
e-type_ddpm_yeo_35.csv	SVM_linear_5	0.6818713450292397	0.012644297257567053	0.6661713763419321	0.6975713137165473	0.7658399317505797	0.01401547518722888	0.7484374207928794	0.78324244270828	nan
e-type_ddpm_yeo_35.csv	logistic_regression_3	0.6818713450292397	0.01139975946761283	0.6677166741101224	0.6960260159483571	0.7625165860317192	0.011091632559711176	0.7487445052010212	0.7762886668624173	nan
e-type_ddpm_yeo_35.csv	SVM_linear_2	0.6818713450292397	0.012644297257567053	0.6661713763419321	0.6975713137165473	0.7658399317505797	0.01401547518722888	0.7484374207928794	0.78324244270828	nan
e-type_ddpm_yeo_35.csv	SVM_linear_5	0.6818713450292397	0.012644297257567053	0.6661713763419321	0.6975713137165473	0.7658399317505797	0.01401547518722888	0.7484374207928794	0.78324244270828	nan
e-type_ddpm_yeo_35.csv	logistic_regression_3	0.6818713450292397	0.01139975946761283	0.6677166741101224	0.6960260159483571	0.7625165860317192	0.011091632559711176	0.7487445052010212	0.7762886668624173	nan
e-type_ddpm_yeo_35.csv	SVM_linear_2	0.6818713450292397	0.012644297257567053	0.6661713763419321	0.6975713137165473	0.7658399317505797	0.01401547518722888	0.7484374207928794	0.78324244270828	nan
e-type_ddpm_yeo_35.csv	SVM_linear_5	0.6818713450292397	0.012644297257567053	0.6661713763419321	0.6975713137165473	0.7658399317505797	0.01401547518722888	0.7484374207928794	0.78324244270828	nan
e-type_ddpm_yeo_35.csv	logistic_regression_3	0.6818713450292397	0.01139975946761283	0.6677166741101224	0.6960260159483571	0.7625165860317192	0.011091632559711176	0.7487445052010212	0.7762886668624173	nan
e-type_ddpm_yeo_35.csv	SVM_linear_2	0.6818713450292397	0.012644297257567053	0.6661713763419321	0.6975713137165473	0.7658399317505797	0.01401547518722888	0.7484374207928794	0.78324244270828	nan
e-type_ddpm_yeo_35.csv	SVM_linear_5	0.6818713450292397	0.012644297257567053	0.6661713763419321	0.6975713137165473	0.7658399317505797	0.01401547518722888	0.7484374207928794	0.78324244270828	nan
e-type_ddpm_yeo_35.csv	logistic_regression_3	0.6818713450292397	0.01139975946761283	0.6677166741101224	0.6960260159483571	0.7625165860317192	0.011091632559711176	0.7487445052010212	0.7762886668624173	nan
e-type_ddpm_yeo_35.csv	mlp_50_lr0.001	0.6812865497076024	0.017049566943992	0.6601167162482824	0.7024563831669224	0.7745514555478553	0.0129421781050636	0.7584816189364567	0.7906212921592539	0.0334562785435603
e-type_flow_yeo_100.csv	lda	0.6811827956989247	0.0072630409065087	0.6721645392878315	0.6902010521100179	0.744089409336795	0.0049292306652839	0.73796896108087	0.7502098575927201	0.0251130773616121
e-type_flow_yeo_100.csv	lda	0.6811827956989247	0.0072630409065087	0.6721645392878315	0.6902010521100179	0.744089409336795	0.0049292306652839	0.73796896108087	0.7502098575927201	0.0251130773616121
e-type_ddpm_yeo_35.csv	logistic_regression_6	0.6807017543859649	0.0184233731017817	0.6578261152800069	0.7035773934919229	0.7661316256861278	0.017396291223883444	0.7445312771711636	0.787731974201092	nan
e-type_ddpm_yeo_35.csv	logistic_regression_6	0.6807017543859649	0.0184233731017817	0.6578261152800069	0.7035773934919229	0.7661316256861278	0.017396291223883444	0.7445312771711636	0.787731974201092	nan
e-type_ddpm_yeo_35.csv	logistic_regression_6	0.6807017543859649	0.0184233731017817	0.6578261152800069	0.7035773934919229	0.7661316256861278	0.017396291223883444	0.7445312771711636	0.787731974201092	nan
e-type_gan_yeo_10000.csv	mlp_128_64_alpha	0.6806451612903226	0.0268413675620787	0.647317201525935	0.7139731210547102	0.7019500397773768	0.0379859511799132	0.6547842517597526	0.749115827795001	0.0328720863755923
e-type_ddpm_yeo_35.csv	SVM_linear_1	0.6801169590643276	0.01596180592275578	0.660297759303726	0.6999361588249291	0.7600450340558031	0.015266346355979071	0.7410893614014746	0.7790007067101317	nan
e-type_ddpm_yeo_35.csv	SVM_linear_4	0.6801169590643276	0.01596180592275578	0.660297759303726	0.6999361588249291	0.7600450340558031	0.015266346355979071	0.7410893614014746	0.7790007067101317	nan
e-type_ddpm_yeo_35.csv	SVM_linear_1	0.6801169590643276	0.01596180592275578	0.660297759303726	0.6999361588249291	0.7600450340558031	0.015266346355979071	0.7410893614014746	0.7790007067101317	nan
e-type_ddpm_yeo_35.csv	SVM_linear_4	0.6801169590643276	0.01596180592275578	0.660297759303726	0.6999361588249291	0.7600450340558031	0.015266346355979071	0.7410893614014746	0.7790007067101317	nan
e-type_ddpm_yeo_35.csv	SVM_linear_1	0.6801169590643276	0.01596180592275578	0.660297759303726	0.6999361588249291	0.7600450340558031	0.015266346355979071	0.7410893614014746	0.7790007067101317	nan
e-type_ddpm_yeo_35.csv	SVM_linear_4	0.6801169590643276	0.01596180592275578	0.660297759303726	0.6999361588249291	0.7600450340558031	0.015266346355979071	0.7410893614014746	0.7790007067101317	nan
e-type_ddpm_yeo_35.csv	SVM_linear_1	0.6801169590643276	0.01596180592275578	0.660297759303726	0.6999361588249291	0.7600450340558031	0.015266346355979071	0.7410893614014746	0.7790007067101317	nan
e-type_ddpm_yeo_35.csv	SVM_linear_4	0.6801169590643276	0.01596180592275578	0.660297759303726	0.6999361588249291	0.7600450340558031	0.015266346355979071	0.7410893614014746	0.7790007067101317	nan
e-type_ddpm_yeo_35.csv	SVM_linear_1	0.6801169590643276	0.01596180592275578	0.660297759303726	0.6999361588249291	0.7600450340558031	0.015266346355979071	0.7410893614014746	0.7790007067101317	nan
e-type_ddpm_yeo_35.csv	SVM_linear_4	0.6801169590643276	0.01596180592275578	0.660297759303726	0.6999361588249291	0.7600450340558031	0.015266346355979071	0.7410893614014746	0.7790007067101317	nan
e-type_ddpm_yeo_35.csv	SVM_linear_1	0.6801169590643276	0.01596180592275578	0.660297759303726	0.6999361588249291	0.7600450340558031	0.015266346355979071	0.7410893614014746	0.7790007067101317	nan
e-type_ddpm_yeo_35.csv	SVM_linear_4	0.6801169590643276	0.01596180592275578	0.660297759303726	0.6999361588249291	0.7600450340558031	0.015266346355979071	0.7410893614014746	0.7790007067101317	nan
e-type_gan_yeo_1000.csv	mlp_10	0.6801075268817204	0.03346747203760414	0.6385521717417361	0.7216628820217047	0.7110140332881393	0.017622423114278356	0.689132904946026	0.7328951616302526	nan
e-type_gan_yeo_1000.csv	mlp_10	0.6801075268817204	0.0334674720376041	0.6385521717417361	0.7216628820217047	0.7110140332881393	0.0176224231142783	0.689132904946026	0.7328951616302526
e-type_vae_yeo_35.csv	rf_100_20	0.6795321637426901	0.0185620704656185	0.65648430911341	0.7025800183719701	0.7858482700560427	0.0156258671110761	0.7664461934235032	0.8052503466885823	0.0346099749373433
e-type_vae_yeo_35.csv	mlp_128_64	0.6795321637426901	0.0089169302233783	0.6684603325098262	0.690603994975554	0.7732782149100436	0.0049290229341322	0.7671580245864108	0.7793984052336763	0.0371015652577823
e-type_vae_yeo_35.csv	mlp_128_64_alpha	0.6795321637426901	0.0160951566602606	0.6595473871721949	0.6995169403131853	0.7721997306127077	0.0133671761903577	0.755602189179494	0.7887972720459215	0.0375716286918882
e-type_vae_yeo_35.csv	mlp_50_lr0.001	0.67953216374269	0.0064061117836861	0.671577925372418	0.687486402112962	0.767442081435332	0.0061705911160091	0.7597802805989474	0.7751038822717166	0.0334611570065246
e-type_ddpm_yeo_35.csv	logistic_regression_6	0.67953216374269	0.01761680740513692	0.657658008224442	0.701406319260938	0.7651724012085966	0.015758305574476373	0.7456058805040756	0.7847389219131177	nan
e-type_ddpm_yeo_35.csv	logistic_regression_6	0.67953216374269	0.01761680740513692	0.657658008224442	0.701406319260938	0.7651724012085966	0.015758305574476373	0.7456058805040756	0.7847389219131177	nan
e-type_ddpm_yeo_35.csv	logistic_regression_6	0.67953216374269	0.01761680740513692	0.657658008224442	0.701406319260938	0.7651724012085966	0.015758305574476373	0.7456058805040756	0.7847389219131177	nan
e-type_ddpm_yeo_35.csv	mlp_10	0.6783625730994152	0.010337818438399845	0.665526476124487	0.6911986700743433	0.7724413218403605	0.011006856056732484	0.7587745049413047	0.7861081387394163	nan
e-type_gan_yeo_100.csv	mlp_128_64	0.6779569892473118	0.01308673273617	0.6617076643546949	0.6942063141399288	0.755194745854529	0.0124978528096502	0.7396766119659365	0.7707128797431214	0.0304866859961937
e-type_smote_yeo_2000.csv	svm_poly_4	0.6779569892473118	0.0051708021671159	0.6715365903545699	0.6843773881400538	0.70779548148906	0.002787116873391	0.7043348188085842	0.7112561441695359	0.0300672115884977
e-type_ddpm_yeo_35.csv	mlp_128_64	0.6777777777777778	0.012644297257567	0.6620778090904702	0.6934777464650854	0.7710074876103913	0.0108961598204113	0.7574781182427122	0.7845368569780704	0.0369103857351809
e-type_flow_yeo_1000.csv	mlp_50x2_lr0.001	0.6768817204301075	0.0136277331781038	0.659960654765729	0.6938027860944861	0.6591112738323914	0.0472619667522163	0.600427791231861	0.7177947564329219	0.0258065007265985
e-type_ddpm_yeo_35.csv	mlp_11	0.6760233918128653	0.010420192796026595	0.6630850135636969	0.6889617700620337	0.7712160564925323	0.008055394299595066	0.7612139633993893	0.7812181495856754	nan
e-type_ddpm_yeo_35.csv	mlp_128_64_alpha	0.6742690058479532	0.0093840973894042	0.6626171099638921	0.6859209017320144	0.7711763477627416	0.012204968303132	0.7560218780215244	0.7863308175039587	0.0375807952543526
e-type_gan_yeo_100.csv	mlp_128_64_alpha	0.6741935483870967	0.0144011776730956	0.6563121245386779	0.6920749722355154	0.7529772857288161	0.0132760638965966	0.7364928751505593	0.7694616963070728	0.0312851226204623
e-type_ddpm_yeo_35.csv	random_forest_3	0.6736842105263158	0.01635859734584719	0.6533723291408656	0.6939960919117659	0.7868675573073858	0.0049005687399226614	0.780782697532301	0.7929524170824706	nan
e-type_ddpm_yeo_35.csv	random_forest_3	0.6736842105263158	0.01635859734584719	0.6533723291408656	0.6939960919117659	0.7868675573073858	0.0049005687399226614	0.780782697532301	0.7929524170824706	nan
e-type_ddpm_yeo_35.csv	logistic_l1_3	0.6730994152046784	0.0038123990673699	0.6683656965359396	0.6778331338734173	0.7606748667435419	0.0053472889618141	0.7540353305516649	0.7673144029354189	0.037395945088868
e-type_vae_yeo_35.csv	logistic_l1_3	0.6730994152046784	0.0038123990673699	0.6683656965359396	0.6778331338734173	0.760387861932068	0.0055099023788937	0.7535464145145783	0.7672293093495577	0.0373946966570423
e-type_ddpm_yeo_35.csv	mlp_50x2_lr0.001	0.6730994152046783	0.0088688601684813	0.6620872708283716	0.684111559580985	0.7746416428862282	0.0044431467003804	0.7691247475896279	0.7801585381828284	0.0376107166228769
e-type_gan_yeo_10000.csv	mlp_4	0.6720430107526882	0.01646162461547836	0.6516032041157038	0.6924828173896727	0.693189868182618	0.020254362145630186	0.6680407558998077	0.7183389804654282	nan
e-type_gan_yeo_10000.csv	mlp_4	0.6720430107526882	0.0164616246154783	0.6516032041157038	0.6924828173896727	0.693189868182618	0.0202543621456301	0.6680407558998077	0.7183389804654282
e-type_ddpm_yeo_35.csv	logistic_l1_3	0.6719298245614035	0.0048045838377645	0.6659641457836994	0.6778955033391075	0.7598398242525904	0.0061049939000503	0.7522594731176444	0.7674201753875365	0.0373950362027572
e-type_ddpm_yeo_35.csv	mlp_128_64_alpha	0.6719298245614035	0.015935001863671	0.6521439064359733	0.6917157426868337	0.7686053203345022	0.0193411211862027	0.7445901464726982	0.7926204941963063	0.037896022319247
e-type_ddpm_yeo_35.csv	mlp_12	0.6719298245614035	0.015935001863671	0.6521439064359733	0.6917157426868337	0.7681510696259066	0.012662133434189694	0.7524289544002211	0.7838731848515922	nan
e-type_flow_yeo_1000.csv	mlp_11	0.671505376344086	0.036384783474599225	0.6263277006212368	0.7166830520669353	0.704490708704058	0.033339151223558953	0.6630946848990938	0.7458867325090223	nan
e-type_flow_yeo_1000.csv	mlp_11	0.671505376344086	0.0363847834745992	0.6263277006212368	0.7166830520669353	0.704490708704058	0.0333391512235589	0.6630946848990938	0.7458867325090223
e-type_vae_yeo_35.csv	logistic_l2_3	0.6707602339181287	0.0114371972021099	0.6565590779119119	0.6849613899243454	0.754822994847298	0.0107349983651014	0.7414937338565752	0.7681522558380207	0.0372763601190395
e-type_ddpm_yeo_35.csv	logistic_l2_3	0.6701754385964913	0.0145318989939054	0.6521317027902254	0.6882191744027573	0.7544015821287309	0.0132601372827721	0.7379369470534732	0.7708662172039885	0.0372760326751047
e-type_ddpm_yeo_35.csv	logistic_l2_3	0.6701754385964912	0.0124741105308196	0.654686784640758	0.6856640925522244	0.7543355439337475	0.0115527013682353	0.7399909705628103	0.7686801173046847	0.0372744035058015
e-type_flow_yeo_1000.csv	mlp_12	0.6698924731182796	0.027109252119309077	0.6362318907435044	0.7035530554930548	0.7049173684019728	0.03182104018138157	0.6654063284233559	0.7444284083805898	nan
e-type_flow_yeo_1000.csv	mlp_12	0.6698924731182796	0.027109252119309	0.6362318907435044	0.7035530554930548	0.7049173684019728	0.0318210401813815	0.6654063284233559	0.7444284083805898
e-type_gan_yeo_100.csv	mlp_100_lr0.001	0.6693548387096774	0.0155589205682664	0.6500358871891488	0.6886737902302059	0.7543252399747062	0.0168432114179709	0.7334116307428772	0.7752388492065353	0.0289903662243033
e-type_ddpm_yeo_35.csv	logistic_l1_2	0.6684210526315789	0.0123362708244028	0.6531035492768263	0.6837385559863315	0.7646741203129637	0.0133856702467894	0.7480536154756979	0.7812946251502294	0.0390014128050019
e-type_ddpm_yeo_35.csv	logistic_l1_2	0.6684210526315789	0.0123362708244028	0.6531035492768263	0.6837385559863315	0.7646741203129637	0.0133856702467894	0.7480536154756979	0.7812946251502294	0.0390014278386055
e-type_vae_yeo_35.csv	logistic_l1_2	0.6684210526315789	0.0123362708244028	0.6531035492768263	0.6837385559863315	0.7646741203129637	0.0133856702467894	0.7480536154756979	0.7812946251502294	0.0390014400309057
e-type_ddpm_yeo_35.csv	logistic_regression_5	0.6684210526315789	0.012508333120589122	0.6528899057182036	0.6839521995449542	0.7648305461265128	0.01307358480653572	0.7485975465447736	0.781063545708252	nan
e-type_ddpm_yeo_35.csv	logistic_regression_5	0.6684210526315789	0.012508333120589122	0.6528899057182036	0.6839521995449542	0.7648305461265128	0.01307358480653572	0.7485975465447736	0.781063545708252	nan
e-type_ddpm_yeo_35.csv	logistic_regression_5	0.6684210526315789	0.012508333120589122	0.6528899057182036	0.6839521995449542	0.7648305461265128	0.01307358480653572	0.7485975465447736	0.781063545708252	nan
e-type_ddpm_yeo_35.csv	logistic_regression_5	0.6684210526315789	0.012508333120589122	0.6528899057182036	0.6839521995449542	0.7648305461265128	0.01307358480653572	0.7485975465447736	0.781063545708252	nan
e-type_ddpm_yeo_35.csv	logistic_regression_5	0.6684210526315789	0.012508333120589122	0.6528899057182036	0.6839521995449542	0.7648305461265128	0.01307358480653572	0.7485975465447736	0.781063545708252	nan
e-type_ddpm_yeo_35.csv	logistic_regression_5	0.6684210526315789	0.012508333120589122	0.6528899057182036	0.6839521995449542	0.7648305461265128	0.01307358480653572	0.7485975465447736	0.781063545708252	nan
e-type_gan_yeo_10000.csv	extra_tree	0.6682795698924732	0.0161960971305291	0.6481694591740839	0.6883896806108625	0.6785443743293512	0.019568209209981	0.6542472334439984	0.7028415152147041	0.0387873561037318
e-type_gan_yeo_10000.csv	mlp_128_64_es	0.6682795698924732	0.0231713569242042	0.6395085302101592	0.6970506095747872	0.7078290129821949	0.012336266601713	0.6925115148706043	0.7231465110937856	0.0314742935507
e-type_ddpm_yeo_35.csv	svm_linear_bal	0.6678362573099415	0.0182133467864297	0.6452214003184313	0.6904511143014516	0.754078382224219	0.0146802000834401	0.7358505062941834	0.7723062581542546	0.0319693706883497
e-type_ddpm_yeo_35.csv	random_forest_4	0.6678362573099415	0.020942695414584742	0.6418324663883045	0.6938400482315784	0.7853830708208219	0.010306743172356967	0.7725855588849738	0.79818058275667	nan
e-type_ddpm_yeo_35.csv	random_forest_4	0.6678362573099415	0.020942695414584742	0.6418324663883045	0.6938400482315784	0.7853830708208219	0.010306743172356967	0.7725855588849738	0.79818058275667	nan
e-type_gan_yeo_100.csv	mlp_10	0.667741935483871	0.014300468901366034	0.6499855580916122	0.6854983128761297	0.7490229849401728	0.00885603153798391	0.7380267694125011	0.7600192004678445	nan
e-type_gan_yeo_100.csv	mlp_10	0.667741935483871	0.014300468901366	0.6499855580916122	0.6854983128761297	0.7490229849401728	0.0088560315379839	0.7380267694125011	0.7600192004678445
e-type_ddpm_yeo_35.csv	svm_sigmoid	0.6637426900584795	0.0156097635263615	0.644360608667322	0.683124771449637	0.7811243697726897	0.0056139357166554	0.7741537479050884	0.7880949916402911	0.0320010589930196
e-type_ddpm_yeo_35.csv	svm_sigmoid_bal	0.6637426900584795	0.0156097635263615	0.644360608667322	0.683124771449637	0.7811243697726897	0.0056139357166554	0.7741537479050884	0.7880949916402911	0.0321469127234181
e-type_ddpm_yeo_35.csv	svm_sigmoid	0.6637426900584795	0.0156097635263615	0.644360608667322	0.683124771449637	0.7811243697726897	0.0056139357166554	0.7741537479050884	0.7880949916402911	0.0321561492018961
e-type_ddpm_yeo_35.csv	svm_sigmoid_bal	0.6637426900584795	0.0156097635263615	0.644360608667322	0.683124771449637	0.7811243697726897	0.0056139357166554	0.7741537479050884	0.7880949916402911	0.0321426579747535
e-type_vae_yeo_35.csv	svm_sigmoid	0.6637426900584795	0.0156097635263615	0.644360608667322	0.683124771449637	0.7811243697726897	0.0056139357166554	0.7741537479050884	0.7880949916402911	0.0319811765836354
e-type_vae_yeo_35.csv	svm_sigmoid_bal	0.6637426900584795	0.0156097635263615	0.644360608667322	0.683124771449637	0.7811243697726897	0.0056139357166554	0.7741537479050884	0.7880949916402911	0.031930532981751
e-type_gan_yeo_100.csv	mlp_128_64_es	0.6634408602150537	0.0089963443713341	0.652270423293725	0.6746112971363823	0.7541233560487014	0.0109539712290825	0.7405222043361896	0.7677245077612131	0.0262987630351139
e-type_gan_yeo_100.csv	mlp_8	0.6629032258064516	0.013251352197705618	0.6464494988550421	0.679356952757861	0.7462617491214574	0.020808280716248417	0.720424856091574	0.7720986421513407	nan
e-type_gan_yeo_100.csv	mlp_8	0.6629032258064516	0.0132513521977056	0.6464494988550421	0.679356952757861	0.7462617491214574	0.0208082807162484	0.720424856091574	0.7720986421513407
e-type_ddpm_yeo_35.csv	mlp_9	0.6625730994152047	0.020530397288353146	0.6370812442334364	0.688064954596973	0.760053838574005	0.01833643849228838	0.7372861430428528	0.7828215341051572	nan
e-type_gan_yeo_10000.csv	mlp_2	0.6623655913978495	0.01737981707015548	0.6407856982464701	0.6839454845492288	0.6915116172992357	0.009610609497569176	0.6795784694853089	0.7034447651131626	nan
e-type_gan_yeo_10000.csv	mlp_2	0.6623655913978495	0.0173798170701554	0.6407856982464701	0.6839454845492288	0.6915116172992357	0.0096106094975691	0.6795784694853089	0.7034447651131626
e-type_gan_yeo_10000.csv	mlp_8	0.6618279569892473	0.013627733178103832	0.6449068913248688	0.6787490226536259	0.6893455742264721	0.009862585014012363	0.677099557485349	0.7015915909675953	nan
e-type_gan_yeo_10000.csv	mlp_8	0.6618279569892473	0.0136277331781038	0.6449068913248688	0.6787490226536259	0.6893455742264721	0.0098625850140123	0.677099557485349	0.7015915909675953
e-type_gan_yeo_100.csv	mlp_1	0.6607526881720429	0.00976661404547577	0.6486258351274244	0.6728795412166614	0.749595699335391	0.0067100300534407185	0.7412640965911684	0.7579273020796137	nan
e-type_gan_yeo_100.csv	mlp_1	0.6607526881720429	0.0097666140454757	0.6486258351274244	0.6728795412166614	0.749595699335391	0.0067100300534407	0.7412640965911684	0.7579273020796137
e-type_flow_yeo_100.csv	mlp_128_64_es	0.6586021505376344	0.01383821255509	0.6414197402084877	0.6757845608667811	0.7320269977808107	0.0157668348787932	0.7124498865461897	0.7516041090154317	0.0282190561285514
e-type_gan_yeo_100.csv	mlp_12	0.6580645161290322	0.017254630683743225	0.6366400624067262	0.6794889698513381	0.729444550368921	0.011782677735363364	0.7148144236224832	0.7440746771153588	nan
e-type_gan_yeo_100.csv	mlp_12	0.6580645161290322	0.0172546306837432	0.6366400624067262	0.6794889698513381	0.729444550368921	0.0117826777353633	0.7148144236224832	0.7440746771153588
e-type_gan_yeo_10000.csv	mlp_100_lr0.001	0.6575268817204301	0.0170651292990364	0.6363377250451243	0.6787160383957358	0.6853226225033204	0.0189862453686272	0.661748085168033	0.7088971598386079	0.0344318179844909
e-type_smote_yeo_1000.csv	svm_poly_4	0.6575268817204301	0.0081978229472994	0.6473479401031197	0.6677058233377404	0.7073070170442357	0.0062452025127625	0.6995525739226467	0.7150614601658247	0.0304123994227338
e-type_gan_yeo_100.csv	mlp_11	0.6548387096774193	0.01619609713052909	0.63472859895903	0.6749488203958086	0.7240954683690128	0.00582564274386553	0.716861977507558	0.7313289592304677	nan
e-type_gan_yeo_100.csv	mlp_11	0.6548387096774193	0.016196097130529	0.63472859895903	0.6749488203958086	0.7240954683690128	0.0058256427438655	0.716861977507558	0.7313289592304677
e-type_gan_yeo_1000.csv	SVM_rbf_6	0.6537634408602151	0.007928968389114308	0.6439183262685562	0.663608555451874	0.6558157336259364	0.009615187446215295	0.64387690153799	0.6677545657138827	nan
e-type_gan_yeo_1000.csv	SVM_rbf_6	0.6537634408602151	0.0079289683891143	0.6439183262685562	0.663608555451874	0.6558157336259364	0.0096151874462152	0.64387690153799	0.6677545657138827
e-type_gan_yeo_100.csv	mlp_6	0.653763440860215	0.009194963105638202	0.6423463862071321	0.6651804955132978	0.7431519813637943	0.019483519692889043	0.7189599964028399	0.7673439663247488	nan
e-type_gan_yeo_100.csv	mlp_6	0.653763440860215	0.0091949631056382	0.6423463862071321	0.6651804955132978	0.7431519813637943	0.019483519692889	0.7189599964028399	0.7673439663247488
e-type_gan_yeo_100.csv	mlp_50_lr0.001	0.653763440860215	0.0138903340674879	0.6365163131255919	0.6710105685948381	0.7397548939275111	0.0187321988454483	0.7164957970139237	0.7630139908410986	0.0292647180859124
e-type_gan_yeo_100.csv	logistic_regression_2	0.6526881720430107	0.00994986856092566	0.6403337784640497	0.6650425656219716	0.7535059918651984	0.017226573303181936	0.7321163759822192	0.7748956077481776	nan
e-type_gan_yeo_100.csv	mlp_3	0.6526881720430107	0.010306607264882148	0.6398908288585811	0.6654855152274403	0.7369935883977281	0.013488926528207688	0.7202448739532369	0.7537423028422193	nan
e-type_gan_yeo_100.csv	logistic_regression_2	0.6526881720430107	0.0099498685609256	0.6403337784640497	0.6650425656219716	0.7535059918651984	0.0172265733031819	0.7321163759822192	0.7748956077481776
e-type_gan_yeo_100.csv	mlp_3	0.6526881720430107	0.0103066072648821	0.6398908288585811	0.6654855152274403	0.7369935883977281	0.0134889265282076	0.7202448739532369	0.7537423028422193
e-type_gan_yeo_100.csv	logistic_l2_2	0.6526881720430107	0.0099498685609256	0.6403337784640497	0.6650425656219716	0.7535059918651984	0.0172265733031819	0.7321163759822192	0.7748956077481776	0.0278759471183036
e-type_flow_yeo_10000.csv	mlp_2	0.6494623655913978	0.019065186265050677	0.6257898101870355	0.6731349209957601	0.6691584837030033	0.022339810625073415	0.6414199451231597	0.696897022282847	nan
e-type_flow_yeo_10000.csv	mlp_2	0.6494623655913978	0.0190651862650506	0.6257898101870355	0.6731349209957601	0.6691584837030033	0.0223398106250734	0.6414199451231597	0.696897022282847
e-type_gan_yeo_100.csv	mlp_9	0.6483870967741936	0.014772722219391477	0.6300443394389104	0.6667298541094768	0.7369808553106438	0.007951273344624107	0.7271080454587469	0.7468536651625408	nan
e-type_gan_yeo_1000.csv	SVM_rbf_3	0.6483870967741936	0.005170802167115948	0.6419666978814517	0.6548074956669355	0.6536131082949737	0.008429990289643507	0.643145892847116	0.6640803237428313	nan
e-type_gan_yeo_100.csv	mlp_9	0.6483870967741936	0.0147727222193914	0.6300443394389104	0.6667298541094768	0.7369808553106438	0.0079512733446241	0.7271080454587469	0.7468536651625408
e-type_gan_yeo_1000.csv	SVM_rbf_3	0.6483870967741936	0.0051708021671159	0.6419666978814517	0.6548074956669355	0.6536131082949737	0.0084299902896435	0.643145892847116	0.6640803237428313
e-type_gan_yeo_1000.csv	mlp_12	0.646236559139785	0.004883307022737885	0.6401731326174757	0.6522999856620942	0.6890879892763151	0.0161153714573677	0.669078112720021	0.7090978658326091	nan
e-type_gan_yeo_1000.csv	mlp_12	0.646236559139785	0.0048833070227378	0.6401731326174757	0.6522999856620942	0.6890879892763151	0.0161153714573677	0.669078112720021	0.7090978658326091
e-type_gan_yeo_1000.csv	mlp_50x2_lr0.001	0.646236559139785	0.0289899133646083	0.6102408274039045	0.6822322908756654	0.6817037994268322	0.0259317747438636	0.6495052483178471	0.7139023505358174	0.0361919615951577
e-type_ddpm_yeo_35.csv	mlp_128_64_es	0.6450292397660818	0.0378200296011813	0.5980694705992943	0.6919890089328694	0.7520838524685305	0.0210003252141439	0.7260085046995571	0.7781592002375038	0.0347644746954806
e-type_gan_yeo_100.csv	logistic_l1_1	0.6446236559139785	0.0119313661404151	0.6298089081280377	0.6594384036999194	0.7448829258597097	0.0134914925946105	0.728131025222949	0.7616348264964704	0.0273241032991998
e-type_gan_yeo_100.csv	logistic_l1_balanced_1	0.6446236559139785	0.0119313661404151	0.6298089081280377	0.6594384036999194	0.7448829258597097	0.0134914925946105	0.728131025222949	0.7616348264964704	0.0273241575749408
e-type_gan_yeo_100.csv	logistic_regression_4	0.6446236559139784	0.010819683762095748	0.6311892441146343	0.6580580677133225	0.7421377531938786	0.005475340911792423	0.7353392195058138	0.7489362868819435	nan
e-type_gan_yeo_100.csv	logistic_regression_4	0.6446236559139784	0.0108196837620957	0.6311892441146343	0.6580580677133225	0.7421377531938786	0.0054753409117924	0.7353392195058138	0.7489362868819435
e-type_gan_yeo_100.csv	logistic_l2_1	0.6440860215053764	0.0144262450161276	0.6261734724395842	0.6619985705711686	0.7443862991930923	0.0086307281765662	0.7336698347379671	0.7551027636482175	0.0274549689178311
e-type_gan_yeo_100.csv	logistic_l2_balanced_1	0.6440860215053764	0.0144262450161276	0.6261734724395842	0.6619985705711686	0.7443862991930923	0.0086307281765662	0.7336698347379671	0.7551027636482175	0.0274551689942606
e-type_smote_yeo_1000.csv	svm_sigmoid	0.6440860215053764	0.0061886367920544	0.6364018140027231	0.6517702290080297	0.739435465583655	0.0083553431585152	0.7290609367910885	0.7498099943762215	0.0272184261020859
e-type_smote_yeo_1000.csv	svm_sigmoid_bal	0.6440860215053764	0.0061886367920544	0.6364018140027231	0.6517702290080297	0.739435465583655	0.0083553431585152	0.7290609367910885	0.7498099943762215	0.0272029877765177
e-type_gan_yeo_100.csv	logistic_regression_1	0.6435483870967742	0.015277712084282588	0.6245786020267978	0.6625181721667506	0.7436609174114565	0.009094115569348674	0.7323690815134919	0.754952753309421	nan
e-type_gan_yeo_100.csv	logistic_regression_1	0.6435483870967742	0.0152777120842825	0.6245786020267978	0.6625181721667506	0.7436609174114565	0.0090941155693486	0.7323690815134919	0.754952753309421
e-type_gan_yeo_1000.csv	svm_rbf_3	0.6435483870967741	0.0061886367920544	0.6358641795941208	0.6512325945994274	0.649501306190909	0.007943359870914	0.6396383222144185	0.6593642901673994	0.0277113121893571
e-type_ddpm_yeo_35.csv	mlp_128_64_es	0.6426900584795322	0.0145318989939054	0.6246463226732663	0.6607337942857981	0.7575530728133314	0.0091029509677674	0.7462502663192404	0.7688558793074224	0.0345202937620071
e-type_ddpm_yeo_35.csv	SVM_rbf_3	0.6421052631578948	0.010254782407456264	0.629372269033143	0.6548382572826467	0.7713406283547195	0.005004016636202177	0.7651273210511346	0.7775539356583044	nan
e-type_ddpm_yeo_35.csv	SVM_rbf_3	0.6421052631578948	0.010254782407456264	0.629372269033143	0.6548382572826467	0.7713406283547195	0.005004016636202177	0.7651273210511346	0.7775539356583044	nan
e-type_ddpm_yeo_35.csv	SVM_rbf_3	0.6421052631578948	0.010254782407456264	0.629372269033143	0.6548382572826467	0.7713406283547195	0.005004016636202177	0.7651273210511346	0.7775539356583044	nan
e-type_ddpm_yeo_35.csv	SVM_rbf_3	0.6421052631578948	0.010254782407456264	0.629372269033143	0.6548382572826467	0.7713406283547195	0.005004016636202177	0.7651273210511346	0.7775539356583044	nan
e-type_ddpm_yeo_35.csv	SVM_rbf_3	0.6421052631578948	0.010254782407456264	0.629372269033143	0.6548382572826467	0.7713406283547195	0.005004016636202177	0.7651273210511346	0.7775539356583044	nan
e-type_ddpm_yeo_35.csv	SVM_rbf_3	0.6421052631578948	0.010254782407456264	0.629372269033143	0.6548382572826467	0.7713406283547195	0.005004016636202177	0.7651273210511346	0.7775539356583044	nan
e-type_gan_yeo_10000.csv	mlp_6	0.6408602150537634	0.023481148174110147	0.6117045187294827	0.6700159113780442	0.6727786924241276	0.02450334557651787	0.6423537703862199	0.7032036144620353	nan
e-type_gan_yeo_10000.csv	mlp_6	0.6408602150537634	0.0234811481741101	0.6117045187294827	0.6700159113780442	0.6727786924241276	0.0245033455765178	0.6423537703862199	0.7032036144620353
e-type_gan_yeo_10000.csv	mlp_10	0.6387096774193548	0.004498172185667069	0.6331244589586904	0.6442948958800192	0.6749856381485091	0.005694672137694202	0.6679147687735602	0.682056507523458	nan
e-type_gan_yeo_10000.csv	mlp_10	0.6387096774193548	0.004498172185667	0.6331244589586904	0.6442948958800192	0.6749856381485091	0.0056946721376942	0.6679147687735602	0.682056507523458
e-type_ddpm_yeo_35.csv	svm_poly_3	0.6385964912280702	0.0245161097266135	0.6081557204045209	0.6690372620516194	0.7492362950543482	0.0226597192682784	0.7211005374295226	0.7773720526791738	0.0390708159608246
e-type_ddpm_yeo_35.csv	svm_poly_3	0.6385964912280702	0.0245161097266135	0.6081557204045209	0.6690372620516194	0.7492362950543482	0.0226597192682784	0.7211005374295226	0.7773720526791738	0.0392656674781251
e-type_vae_yeo_35.csv	svm_poly_3	0.6385964912280702	0.0245161097266135	0.6081557204045209	0.6690372620516194	0.7492362950543482	0.0226597192682784	0.7211005374295226	0.7773720526791738	0.0388000894523274
e-type_flow_yeo_10000.csv	mlp_3	0.6376344086021506	0.0258120513637802	0.6055845137039583	0.6696843035003429	0.6254530370402136	0.029882604253376428	0.5883488831662254	0.6625571909142018	nan
e-type_flow_yeo_10000.csv	mlp_3	0.6376344086021506	0.0258120513637802	0.6055845137039583	0.6696843035003429	0.6254530370402136	0.0298826042533764	0.5883488831662254	0.6625571909142018
e-type_ddpm_yeo_35.csv	svm_rbf_3	0.6374269005847953	0.0103378184383998	0.6245908036098672	0.6502629975597235	0.7663741455738948	0.0072482469778394	0.7573742582514223	0.7753740328963673	0.0558838398981346
e-type_ddpm_yeo_35.csv	svm_rbf_3	0.6374269005847953	0.0103378184383998	0.6245908036098672	0.6502629975597235	0.7663741455738948	0.0072482469778394	0.7573742582514223	0.7753740328963673	0.0579488253458126
e-type_vae_yeo_35.csv	svm_rbf_3	0.6374269005847953	0.0103378184383998	0.6245908036098672	0.6502629975597235	0.7663741455738948	0.0072482469778394	0.7573742582514223	0.7753740328963673	0.0532394387074458
e-type_ddpm_yeo_35.csv	SVM_rbf_6	0.6374269005847953	0.011134171207403377	0.6236020010467256	0.6512518001228651	0.7653851198106476	0.006918013892070764	0.7567952710217898	0.7739749685995054	nan
e-type_ddpm_yeo_35.csv	SVM_rbf_6	0.6374269005847953	0.011134171207403377	0.6236020010467256	0.6512518001228651	0.7653851198106476	0.006918013892070764	0.7567952710217898	0.7739749685995054	nan
e-type_ddpm_yeo_35.csv	SVM_rbf_6	0.6374269005847953	0.011134171207403377	0.6236020010467256	0.6512518001228651	0.7653851198106476	0.006918013892070764	0.7567952710217898	0.7739749685995054	nan
e-type_ddpm_yeo_35.csv	SVM_rbf_6	0.6374269005847953	0.011134171207403377	0.6236020010467256	0.6512518001228651	0.7653851198106476	0.006918013892070764	0.7567952710217898	0.7739749685995054	nan
e-type_ddpm_yeo_35.csv	SVM_rbf_6	0.6374269005847953	0.011134171207403377	0.6236020010467256	0.6512518001228651	0.7653851198106476	0.006918013892070764	0.7567952710217898	0.7739749685995054	nan
e-type_ddpm_yeo_35.csv	SVM_rbf_6	0.6374269005847953	0.011134171207403377	0.6236020010467256	0.6512518001228651	0.7653851198106476	0.006918013892070764	0.7567952710217898	0.7739749685995054	nan
e-type_flow_yeo_1000.csv	mlp_6	0.6370967741935484	0.009876974769287	0.6248328902113578	0.649360658175739	0.5953647207798365	0.014092380296268301	0.577866719516964	0.612862722042709	nan
e-type_gan_yeo_100.csv	mlp_7	0.6370967741935484	0.01435091162907433	0.619277763882323	0.6549157845047737	0.7167578440432569	0.016838850902860625	0.695849649106054	0.7376660389804599	nan
e-type_flow_yeo_1000.csv	mlp_6	0.6370967741935484	0.009876974769287	0.6248328902113578	0.649360658175739	0.5953647207798365	0.0140923802962683	0.577866719516964	0.612862722042709
e-type_gan_yeo_100.csv	mlp_7	0.6370967741935484	0.0143509116290743	0.619277763882323	0.6549157845047737	0.7167578440432569	0.0168388509028606	0.695849649106054	0.7376660389804599
e-type_gan_yeo_100.csv	logistic_l1_3	0.6365591397849463	0.0159488139507433	0.6167560716882583	0.6563622078816342	0.7378271631710722	0.008864377285154	0.7268205850296012	0.7488337413125432	0.0276683478979938
e-type_gan_yeo_100.csv	logistic_regression_6	0.6365591397849462	0.017359015366626804	0.6150050753599396	0.6581132042099527	0.7372713779264892	0.010429519327025122	0.7243214192595517	0.7502213365934267	nan
e-type_gan_yeo_100.csv	logistic_regression_6	0.6365591397849462	0.0173590153666268	0.6150050753599396	0.6581132042099527	0.7372713779264892	0.0104295193270251	0.7243214192595517	0.7502213365934267
e-type_gan_yeo_1000.csv	mlp_9	0.636021505376344	0.02188839030733577	0.608843479153093	0.6631995315995951	0.6794458307347764	0.017139757480264972	0.6581640109335877	0.7007276505359651	nan
e-type_gan_yeo_1000.csv	mlp_9	0.636021505376344	0.0218883903073357	0.608843479153093	0.6631995315995951	0.6794458307347764	0.0171397574802649	0.6581640109335877	0.7007276505359651
e-type_gan_yeo_100.csv	logistic_l2_3	0.635483870967742	0.016196097130529	0.6153737602493526	0.6555939816861313	0.7357421499167043	0.0113464773892372	0.7216536374360554	0.7498306623973532	0.0277036694904378
e-type_smote_yeo_10000.csv	decision_tree_bal	0.635483870967742	0.0132513521977056	0.6190301440163325	0.6519375979191514	0.6613763018790795	0.0145444094328739	0.6433170323111446	0.6794355714470144	0.0428842504743833
e-type_gan_yeo_100.csv	logistic_regression_3	0.6349462365591398	0.01693761720647672	0.613915407058501	0.6559770660597787	0.7355947571271851	0.012260381430584577	0.7203714829005823	0.750818031353788	nan
e-type_gan_yeo_100.csv	logistic_regression_3	0.6349462365591398	0.0169376172064767	0.613915407058501	0.6559770660597787	0.7355947571271851	0.0122603814305845	0.7203714829005823	0.750818031353788
e-type_gan_yeo_1000.csv	mlp_3	0.6344086021505376	0.02224858246941779	0.6067833382871941	0.6620338660138811	0.6803529410870095	0.014792574118057062	0.6619855343638572	0.6987203478101618	nan
e-type_gan_yeo_1000.csv	mlp_3	0.6344086021505376	0.0222485824694177	0.6067833382871941	0.6620338660138811	0.6803529410870095	0.014792574118057	0.6619855343638572	0.6987203478101618
e-type_gan_yeo_100.csv	logistic_regression_5	0.6338709677419355	0.009579854667314756	0.6219760070935064	0.6457659283903646	0.7148114645212924	0.02017073173418639	0.6897661931095269	0.7398567359330579	nan
e-type_gan_yeo_100.csv	logistic_regression_5	0.6338709677419355	0.0095798546673147	0.6219760070935064	0.6457659283903646	0.7148114645212924	0.0201707317341863	0.6897661931095269	0.7398567359330579
e-type_gan_yeo_100.csv	logistic_l1_2	0.6338709677419355	0.0095798546673147	0.6219760070935064	0.6457659283903646	0.7148114645212924	0.0201707317341863	0.6897661931095269	0.7398567359330579	0.0317547079384115
e-type_gan_yeo_100.csv	mlp_50x2_lr0.001	0.6338709677419355	0.0069581608094326	0.6252312699711506	0.6425106655127204	0.7221419601827425	0.0093929698459753	0.7104790476887813	0.7338048726767036	0.0345974694661956
e-type_vae_yeo_35.csv	mlp_128_64_es	0.632748538011696	0.0223258586769837	0.6050273230635	0.6604697529598919	0.7373231502038772	0.0291490299480892	0.7011298491347714	0.773516451272983	0.0366979568353194
e-type_ddpm_yeo_35.csv	mlp_8	0.632748538011696	0.011437197202109894	0.6185473820054792	0.6469496940179127	0.7575723967911406	0.008711018305542757	0.7467562389734542	0.768388554608827	nan
e-type_smote_yeo_10000.csv	decision_tree	0.6295698924731182	0.0076977532598259	0.6200118693833366	0.6391279155628998	0.6634389414845752	0.0108249792609871	0.6499979544549049	0.6768799285142454	0.0435800126502213
e-type_flow_yeo_100.csv	SVM_rbf_2	0.6279569892473118	0.0096174966774184	0.616015289870117	0.6398986886245066	0.5274231541692628	0.0206874584533779	0.5017362817933673	0.5531100265451583
e-type_flow_yeo_100.csv	SVM_rbf_1	0.6263440860215054	0.0091160349235554	0.6150250336505584	0.6376631383924524	0.4992350412117351	0.0185410410259375	0.4762132980806094	0.5222567843428608
e-type_smote_yeo_2000.csv	svm_sigmoid	0.625268817204301	0.0111809862059598	0.6113857891679477	0.6391518452406544	0.7374984723651041	0.0098187757869074	0.7253068519640663	0.749690092766142	0.0283906143392367
e-type_smote_yeo_2000.csv	svm_sigmoid_bal	0.625268817204301	0.0111809862059598	0.6113857891679477	0.6391518452406544	0.7374984723651041	0.0098187757869074	0.7253068519640663	0.749690092766142	0.0285287262847438
e-type_flow_yeo_1000.csv	mlp_10	0.6241935483870968	0.03001858983901853	0.5869205461071422	0.6614665506670515	0.6538094975817079	0.03215029822899061	0.613889629739256	0.6937293654241599	nan
e-type_flow_yeo_1000.csv	mlp_10	0.6241935483870968	0.0300185898390185	0.5869205461071422	0.6614665506670515	0.6538094975817079	0.0321502982289906	0.613889629739256	0.6937293654241599
e-type_gan_yeo_100.csv	lda	0.6241935483870968	0.0051708021671159	0.6177731494943549	0.6306139472798388	0.7315862622531697	0.0042721189246481	0.726281725988389	0.7368907985179504	0.0294331585197635
e-type_gan_yeo_100.csv	mlp_5	0.6241935483870967	0.01525404404205494	0.6052531510730624	0.643133945701131	0.7038112981703026	0.015806586329712744	0.6841848289901985	0.7234377673504068	nan
e-type_gan_yeo_100.csv	mlp_5	0.6241935483870967	0.0152540440420549	0.6052531510730624	0.643133945701131	0.7038112981703026	0.0158065863297127	0.6841848289901985	0.7234377673504068
e-type_flow_yeo_100.csv	SVM_rbf_6	0.6204301075268818	0.0061299754037588	0.6128187377581599	0.6280414772956037	0.588306443285065	0.0241804037645722	0.5582825064685648	0.6183303801015652
e-type_gan_yeo_1000.csv	mlp_1	0.6193548387096774	0.017483454345708693	0.5976462628843717	0.6410634145349832	0.6645104291240183	0.01654749055396164	0.6439640058425472	0.6850568524054893	nan
e-type_gan_yeo_1000.csv	mlp_1	0.6193548387096774	0.0174834543457086	0.5976462628843717	0.6410634145349832	0.6645104291240183	0.0165474905539616	0.6439640058425472	0.6850568524054893
e-type_smote_yeo_5000.csv	decision_tree	0.6193548387096774	0.0116556362304724	0.6048824548261403	0.6338272225932146	0.6460907829314901	0.0046880767036635	0.6402697668677333	0.651911798995247	0.0447817836812144
e-type_flow_yeo_10000.csv	mlp_128_64_es	0.6188172043010753	0.0226030354941697	0.5907518288778428	0.6468825797243078	0.6030789215001062	0.0420644481940653	0.5508490105732279	0.6553088324269846	0.0320121844460016
e-type_gan_yeo_1000.csv	mlp_50_lr0.001	0.6188172043010753	0.0162850873450117	0.5985965976371704	0.6390378109649802	0.6692401935689123	0.0160128422213557	0.6493576238737376	0.689122763264087	0.0356866734077182
e-type_smote_yeo_5000.csv	decision_tree_bal	0.6188172043010753	0.0166145560649058	0.5981875081891437	0.639446900413007	0.6465356907752339	0.0106195273375024	0.6333498060023164	0.6597215755481514	0.0448450347881087
e-type_flow_yeo_100.csv	mlp_6	0.6188172043010753	0.0191408420633525	0.5950507098157062	0.6425836987864445	0.6555938010109715	0.0303956857025084	0.6178525723734498	0.6933350296484933
e-type_flow_yeo_10000.csv	mlp_100_lr0.001	0.617741935483871	0.0202417748355018	0.5926084524108814	0.6428754185568606	0.6188185219481547	0.0248521041631681	0.5879605589291389	0.6496764849671705	0.0304090363818557
e-type_smote_yeo_5000.csv	svm_sigmoid	0.617741935483871	0.0051708021671159	0.6113215365911291	0.624162334376613	0.7226934805366616	0.0067154802319563	0.7143551105019923	0.7310318505713309	0.0280877666475284
e-type_smote_yeo_5000.csv	svm_sigmoid_bal	0.617741935483871	0.0051708021671159	0.6113215365911291	0.624162334376613	0.7226934805366616	0.0067154802319563	0.7143551105019923	0.7310318505713309	0.0281689513080583
e-type_flow_yeo_1000.csv	decision_tree	0.613978494623656	0.0243869213549284	0.5836981323502147	0.6442588568970972	0.647747145406053	0.0167729106873986	0.626920826060423	0.6685734647516831	0.0454142947501581
e-type_flow_yeo_10000.csv	mlp_6	0.6134408602150538	0.011309507509657318	0.5993982519028972	0.6274834685272105	0.5656002098350633	0.027523466659154568	0.5314253121786294	0.5997751074914972	nan
e-type_flow_yeo_10000.csv	mlp_6	0.6134408602150538	0.0113095075096573	0.5993982519028972	0.6274834685272105	0.5656002098350633	0.0275234666591545	0.5314253121786294	0.5997751074914972
e-type_flow_yeo_1000.csv	mlp_9	0.6129032258064516	0.05564581060345281	0.5438098261292789	0.6819966254836244	0.6562371230245947	0.029986624743295238	0.6190038106531988	0.6934704353959906	nan
e-type_flow_yeo_1000.csv	mlp_9	0.6129032258064516	0.0556458106034528	0.5438098261292789	0.6819966254836244	0.6562371230245947	0.0299866247432952	0.6190038106531988	0.6934704353959906
e-type_gan_yeo_100.csv	svm_rbf_3	0.6118279569892474	0.0129758262216636	0.5957163407228593	0.6279395732556355	0.7384384967360142	0.0109891559427192	0.7247936574312929	0.7520833360407356	0.0353312605265879
e-type_flow_yeo_10000.csv	mlp_128_64	0.6118279569892473	0.019347370124136	0.5878050240461844	0.6358508899323102	0.5946631093406826	0.0329141229470669	0.5537948278448571	0.635531390836508	0.0322273547876535
e-type_gan_yeo_100.csv	SVM_rbf_6	0.6107526881720431	0.011148624383509519	0.5969098426455427	0.6245955336985435	0.7385899819234988	0.007263314097920997	0.7295713863004644	0.7476085775465332	nan
e-type_gan_yeo_100.csv	SVM_rbf_6	0.6107526881720431	0.0111486243835095	0.5969098426455427	0.6245955336985435	0.7385899819234988	0.0072633140979209	0.7295713863004644	0.7476085775465332
e-type_smote_yeo_10000.csv	svm_sigmoid	0.6102150537634409	0.0065846498461913	0.6020391311086472	0.6183909764182346	0.6999390481728559	0.0048689568836274	0.6938934397016493	0.7059846566440625	0.0281319498354584
e-type_smote_yeo_10000.csv	svm_sigmoid_bal	0.6102150537634409	0.0065846498461913	0.6020391311086472	0.6183909764182346	0.6999390481728559	0.0048689568836274	0.6938934397016493	0.7059846566440625	0.0280136614438067
e-type_flow_yeo_1000.csv	mlp_5	0.6096774193548387	0.01628508734501177	0.5894568126909338	0.6298980260187436	0.5837628879337181	0.026569716217491823	0.5507722278639677	0.6167535480034685	nan
e-type_flow_yeo_1000.csv	mlp_5	0.6096774193548387	0.0162850873450117	0.5894568126909338	0.6298980260187436	0.5837628879337181	0.0265697162174918	0.5507722278639677	0.6167535480034685
e-type_flow_yeo_10000.csv	mlp_128_64_alpha	0.6096774193548387	0.0300185898390185	0.572404417074884	0.6469504216347933	0.5900436431160608	0.0678247631471275	0.505828076529575	0.6742592097025467	0.0326234895953868
e-type_flow_yeo_10000.csv	lda	0.6091397849462366	0.009036417373103	0.5979195908213115	0.6203599790711616	0.5892175802165452	0.0189757328828571	0.5656560958563702	0.6127790645767203	0.0340436043969398
e-type_gan_yeo_10000.csv	rf_200_20	0.6075268817204302	0.010752688172043	0.594175655933293	0.6208781075075674	0.6530840598779413	0.0121495812631286	0.6379983622302634	0.6681697575256191	0.0453638001099005
e-type_gan_yeo_10000.csv	rf_bal_200_20	0.606989247311828	0.0128076658597543	0.5910864297127475	0.6228920649109085	0.6454262550111689	0.0230220843361691	0.6168405617273368	0.674011948295001	0.0453145626812115
e-type_flow_yeo_1000.csv	decision_tree_bal	0.6059139784946236	0.0214717479007697	0.5792532821477305	0.6325746748415166	0.6314745414122109	0.0168989241699762	0.6104917556619759	0.652457327162446	0.0463630613535736
e-type_flow_yeo_100.csv	mlp_12	0.6059139784946236	0.0179926887426682	0.5835731046519662	0.628254852337281	0.6795387514140719	0.0127338384859531	0.6637276026071224	0.6953499002210215
e-type_flow_yeo_100.csv	mlp_8	0.6048387096774194	0.0247107208479169	0.5741562972308977	0.6355211221239411	0.6165130359971522	0.0274854590030041	0.5823853310790164	0.6506407409152881
e-type_gan_yeo_1000.csv	mlp_11	0.603763440860215	0.02121783576416247	0.5774180180720542	0.6301088636483759	0.6371499139933856	0.01787411455810639	0.614956269446815	0.6593435585399562	nan
e-type_gan_yeo_1000.csv	mlp_11	0.603763440860215	0.0212178357641624	0.5774180180720542	0.6301088636483759	0.6371499139933856	0.0178741145581063	0.614956269446815	0.6593435585399562
e-type_smote_yeo_1000.csv	decision_tree	0.6016129032258065	0.0169376172064767	0.5805820737251677	0.6226437327264454	0.652137858852776	0.0127357060166766	0.6363243912001615	0.6679513265053905	0.0468690702087286
e-type_flow_yeo_10000.csv	decision_tree	0.6010752688172043	0.0105148425890365	0.588019367327618	0.6141311703067907	0.6370827783060949	0.0125128110935213	0.6215460712549449	0.652619485357245	0.046932321315623
e-type_gan_yeo_1000.csv	svm_poly_4	0.6005376344086022	0.0118096143206928	0.5858740614739262	0.6152012073432782	0.6595605252203967	0.0074506603846237	0.6503093084579663	0.668811741982827	0.0308362704137212
e-type_gan_yeo_100.csv	SVM_rbf_3	0.6	0.012522381396615167	0.5844514098480463	0.6155485901519536	0.7370592501661514	0.004699113505822661	0.7312245301024983	0.7428939702298044	nan
e-type_gan_yeo_100.csv	SVM_rbf_3	0.6	0.0125223813966151	0.5844514098480463	0.6155485901519536	0.7370592501661514	0.0046991135058226	0.7312245301024983	0.7428939702298044
e-type_smote_yeo_2000.csv	decision_tree	0.6	0.0147727222193914	0.5816572426647167	0.6183427573352832	0.6261790356616886	0.0132222393272207	0.6097614571134446	0.6425966142099326	0.0470588235294117
e-type_flow_yeo_100.csv	mlp_9	0.5994623655913979	0.024342433167036	0.569237242699208	0.6296874884835878	0.6868551140459814	0.0144085420255828	0.6689645461462093	0.7047456819457536
e-type_gan_yeo_100.csv	svm_poly_3	0.5994623655913978	0.0114049480836539	0.5853012521545415	0.613623479028254	0.7678996494460228	0.0186902102207631	0.7446926882960412	0.7911066105960045	0.034009181010855
e-type_flow_yeo_1000.csv	mlp_8	0.5989247311827958	0.012665826870311543	0.583198029950448	0.6146514324151435	0.49945345228556287	0.05511297485987083	0.431021655568152	0.5678852490029738	nan
e-type_flow_yeo_1000.csv	mlp_8	0.5989247311827958	0.0126658268703115	0.583198029950448	0.6146514324151435	0.4994534522855628	0.0551129748598708	0.431021655568152	0.5678852490029738
e-type_smote_yeo_2000.csv	decision_tree_bal	0.5989247311827958	0.0225229678125305	0.5709587729172744	0.6268906894483172	0.6283038781459492	0.0175110042161407	0.6065610946383728	0.6500466616535256	0.0471853257432005
e-type_flow_yeo_10000.csv	mlp_1	0.5967741935483872	0.018624202231923397	0.5736491921417417	0.6198991949550328	0.6056174883302091	0.023716581795226344	0.5761694625546218	0.6350655141057965	nan
e-type_flow_yeo_10000.csv	mlp_1	0.5967741935483872	0.0186242022319233	0.5736491921417417	0.6198991949550328	0.6056174883302091	0.0237165817952263	0.5761694625546218	0.6350655141057965
e-type_flow_yeo_100.csv	mlp_10	0.596774193548387	0.0444971649388356	0.5415236658216999	0.6520247212750742	0.6929443873980554	0.0349343674912201	0.6495676409841873	0.7363211338119235
e-type_smote_yeo_1000.csv	decision_tree_bal	0.596236559139785	0.0191408420633525	0.5724700646544159	0.6200030536251542	0.6496054867235007	0.0058367296847964	0.6423582296066417	0.6568527438403597	0.0475015812776723
e-type_flow_yeo_10000.csv	decision_tree_bal	0.5935483870967742	0.0306144913494794	0.5555354753648049	0.6315612988287435	0.6200596993238431	0.0247092890073945	0.5893790647421493	0.6507403339055369	0.0478178368121442
e-type_flow_yeo_10000.csv	mlp_50_lr0.001	0.5935483870967742	0.0169376172064767	0.5725175575961353	0.614579216597413	0.6120841198077983	0.0327364194478768	0.571436486349272	0.6527317532663246	0.0321481232991922
e-type_gan_yeo_1000.csv	mlp_7	0.5924731182795699	0.014918749382270533	0.5739490442733799	0.61099719228576	0.6480676699569539	0.018892018752671734	0.624610130418371	0.6715252094955367	nan
e-type_gan_yeo_1000.csv	mlp_7	0.5924731182795699	0.0149187493822705	0.5739490442733799	0.61099719228576	0.6480676699569539	0.0188920187526717	0.624610130418371	0.6715252094955367
e-type_gan_yeo_1000.csv	mlp_5	0.589247311827957	0.019328686034674768	0.5652475782461174	0.6132470454097966	0.6349673021070178	0.027174123457324402	0.6012261713273136	0.668708432886722	nan
e-type_gan_yeo_1000.csv	mlp_5	0.589247311827957	0.0193286860346747	0.5652475782461174	0.6132470454097966	0.6349673021070178	0.0271741234573244	0.6012261713273136	0.668708432886722
e-type_gan_yeo_100.csv	svm_sigmoid	0.5876344086021505	0.0150393556244079	0.56896058216714	0.6063082350371611	0.7105590502598553	0.0220543067648501	0.683175011544599	0.7379430889751116	0.0342698796092777
e-type_gan_yeo_100.csv	svm_sigmoid_bal	0.5876344086021505	0.0150393556244079	0.56896058216714	0.6063082350371611	0.7105590502598553	0.0220543067648501	0.683175011544599	0.7379430889751116	0.0343955855442119
e-type_flow_yeo_1000.csv	SVM_rbf_6	0.5865591397849462	0.002944744932823471	0.5829027560179664	0.5902155235519261	0.43479871032379036	0.033566526404803	0.3931203629421904	0.47647705770539034	nan
e-type_flow_yeo_1000.csv	SVM_rbf_6	0.5865591397849462	0.0029447449328234	0.5829027560179664	0.5902155235519261	0.4347987103237903	0.033566526404803	0.3931203629421904	0.4764770577053903
e-type_gan_yeo_10000.csv	svm_poly_4	0.5865591397849462	0.0066934944075208	0.5782480687569493	0.5948702108129431	0.6027249209123534	0.0072628750036733	0.5937068704968381	0.6117429713278687	0.0318340445154257
e-type_gan_yeo_10000.csv	mlp_3	0.5838709677419355	0.02643445111599901	0.5510482614789222	0.6166936740049488	0.63195149281297	0.01828882189171148	0.609242921100471	0.6546600645254691	nan
e-type_gan_yeo_10000.csv	mlp_3	0.5838709677419355	0.026434451115999	0.5510482614789222	0.6166936740049488	0.63195149281297	0.0182888218917114	0.609242921100471	0.6546600645254691
e-type_flow_yeo_100.csv	mlp_7	0.5838709677419355	0.0355306794554292	0.5397538022304108	0.6279881332534601	0.5922950694892405	0.0331213226823152	0.5511695155417198	0.6334206234367612
e-type_gan_yeo_100.csv	gaussian_nb	0.5833333333333333	0.0117174702783351	0.5687841723387018	0.5978824943279647	0.5269098005535796	0.0352589845416807	0.4831299888349514	0.5706896122722078	0.044149128135418
e-type_ddpm_yeo_35.csv	mlp_6	0.5818713450292398	0.02598887256525025	0.5496018976110629	0.6141407924474166	0.7405457864772972	0.021657859067237464	0.7136540025953374	0.767437570359257	nan
e-type_gan_yeo_10000.csv	rf_100_20	0.5817204301075269	0.0165273399450961	0.5611990271116261	0.6022418331034278	0.625048030238207	0.0165441950023373	0.604505698924542	0.645590361551872	0.0455433920086
e-type_flow_yeo_10000.csv	mlp_8	0.5806451612903226	0.021672735882522994	0.5537349054024149	0.6075554171782304	0.5031726968370185	0.04322051623192984	0.4495073378480497	0.5568380558259872	nan
e-type_flow_yeo_10000.csv	mlp_8	0.5806451612903226	0.0216727358825229	0.5537349054024149	0.6075554171782304	0.5031726968370185	0.0432205162319298	0.4495073378480497	0.5568380558259872
e-type_gan_yeo_10000.csv	mlp_50x2_lr0.001	0.5774193548387097	0.0357334817843169	0.5330503769766533	0.621788332700766	0.6177210455799023	0.0169037111525665	0.596732316005725	0.6387097751540796	0.0442047952211538
e-type_flow_yeo_10000.csv	mlp_5	0.5752688172043012	0.020648241257711326	0.5496306394083754	0.600906995000227	0.4958437904485292	0.03047375178845187	0.4580056299626109	0.5336819509344476	nan
e-type_flow_yeo_10000.csv	mlp_5	0.5752688172043012	0.0206482412577113	0.5496306394083754	0.600906995000227	0.4958437904485292	0.0304737517884518	0.4580056299626109	0.5336819509344476
e-type_flow_yeo_100.csv	mlp_5	0.5741935483870968	0.0233267668278673	0.54522954182244	0.6031575549517536	0.6315196121406915	0.039052740597494	0.5830292301095925	0.6800099941717905
e-type_flow_yeo_10000.csv	SVM_rbf_6	0.5725806451612904	0.0032923249230956664	0.5684926838338935	0.5766686064886872	0.49085664800857015	0.02059274919441235	0.46528737270982873	0.5164259233073116	nan
e-type_flow_yeo_10000.csv	SVM_rbf_6	0.5725806451612904	0.0032923249230956	0.5684926838338935	0.5766686064886872	0.4908566480085701	0.0205927491944123	0.4652873727098287	0.5164259233073116
e-type_flow_yeo_10000.csv	mlp_50x2_lr0.001	0.567741935483871	0.0147727222193915	0.5493991781485876	0.5860846928191543	0.510312771298657	0.0203632700825374	0.4850284319514704	0.5355971106458437	0.0344278468329998
e-type_flow_yeo_100.csv	mlp_11	0.567741935483871	0.0470775602776663	0.509287423763825	0.626196447203917	0.6626252777563597	0.0516234299428558	0.5985263233325213	0.7267242321801981
e-type_gan_yeo_10000.csv	random_forest_2	0.5672043010752688	0.01678762902795273	0.5463597064960594	0.5880488956544782	0.6101686103757216	0.01899022524073345	0.5865891313765224	0.6337480893749208	nan
e-type_gan_yeo_10000.csv	random_forest_2	0.5672043010752688	0.0167876290279527	0.5463597064960594	0.5880488956544782	0.6101686103757216	0.0189902252407334	0.5865891313765224	0.6337480893749208
e-type_gan_yeo_10000.csv	SVM_rbf_6	0.5634408602150538	0.010514842589036578	0.5503849587254674	0.5764967617046401	0.527928377019831	0.014113106834700235	0.5104046403603801	0.5454521136792818	nan
e-type_gan_yeo_10000.csv	SVM_rbf_6	0.5634408602150538	0.0105148425890365	0.5503849587254674	0.5764967617046401	0.527928377019831	0.0141131068347002	0.5104046403603801	0.5454521136792818
e-type_gan_yeo_10000.csv	xgboost	0.5586021505376344	0.01223044426459931	0.5434160482122437	0.5737882528630251	0.5762316210493991	0.013514084747455378	0.5594516685498091	0.593011573548989	0.03700941987269405
e-type_gan_yeo_10000.csv	xgboost	0.5586021505376344	0.0122304442645993	0.5434160482122437	0.5737882528630251	0.5762316210493991	0.0135140847474553	0.5594516685498091	0.593011573548989
e-type_gan_yeo_1000.csv	logistic_l1_2	0.5553763440860214	0.0124064309238864	0.5399717254616297	0.5707809627104131	0.611380246840101	0.0091321116002587	0.6000412326384807	0.6227192610417212	0.040532203459853
e-type_gan_yeo_1000.csv	logistic_regression_5	0.5548387096774194	0.012406430923886417	0.5394340910530278	0.5702433283018111	0.610493018292768	0.009919877172321812	0.5981758639412926	0.6228101726442434	nan
e-type_gan_yeo_1000.csv	logistic_regression_5	0.5548387096774194	0.0124064309238864	0.5394340910530278	0.5702433283018111	0.610493018292768	0.0099198771723218	0.5981758639412926	0.6228101726442434
e-type_flow_yeo_100.csv	SVM_rbf_3	0.5510752688172043	0.0063043222578271	0.5432474188365856	0.558903118797823	0.4408559399382824	0.0067284312778422	0.4325014890561974	0.4492103908203674
e-type_gan_yeo_1000.csv	logistic_regression_4	0.55	0.005889489865646942	0.5426872324660403	0.5573127675339598	0.6080017356966467	0.00825108525677085	0.5977566601872045	0.6182468112060889	nan
e-type_gan_yeo_1000.csv	logistic_regression_4	0.55	0.0058894898656469	0.5426872324660403	0.5573127675339598	0.6080017356966467	0.0082510852567708	0.5977566601872045	0.6182468112060889
e-type_gan_yeo_1000.csv	logistic_l1_1	0.5489247311827956	0.0061299754037588	0.5413133614140737	0.5565361009515175	0.6073241613178564	0.0074223550522006	0.598108090267653	0.6165402323680598	0.0397964607068066
e-type_gan_yeo_1000.csv	logistic_l1_balanced_1	0.5489247311827956	0.0061299754037588	0.5413133614140737	0.5565361009515175	0.6073241613178564	0.0074223550522006	0.598108090267653	0.6165402323680598	0.0397964550436428
e-type_gan_yeo_1000.csv	logistic_regression_6	0.5483870967741936	0.007603298722435988	0.5389463544829561	0.5578278390654311	0.6063127914857855	0.008631188057720564	0.5955957560127876	0.6170298269587835	nan
e-type_gan_yeo_1000.csv	logistic_regression_6	0.5483870967741936	0.0076032987224359	0.5389463544829561	0.5578278390654311	0.6063127914857855	0.0086311880577205	0.5955957560127876	0.6170298269587835
e-type_gan_yeo_1000.csv	logistic_regression_2	0.5483870967741935	0.006304322257827185	0.5405592467935748	0.5562149467548122	0.6053911416072209	0.007994781095591782	0.5954643097473045	0.6153179734671372	nan
e-type_gan_yeo_1000.csv	logistic_regression_2	0.5483870967741935	0.0063043222578271	0.5405592467935748	0.5562149467548122	0.6053911416072209	0.0079947810955917	0.5954643097473045	0.6153179734671372
e-type_gan_yeo_10000.csv	SVM_rbf_3	0.5483870967741934	0.010411245554321004	0.535459827992934	0.5613143655554528	0.5139202511219046	0.013001161488121596	0.49777717696727075	0.5300633252765385	nan
e-type_gan_yeo_10000.csv	SVM_rbf_3	0.5483870967741934	0.010411245554321	0.535459827992934	0.5613143655554528	0.5139202511219046	0.0130011614881215	0.4977771769672707	0.5300633252765385
e-type_gan_yeo_1000.csv	logistic_regression_1	0.5478494623655914	0.007928968389114308	0.5380043477739325	0.5576945769572503	0.6046826271442651	0.00936056132762549	0.5930599551407741	0.6163052991477561	nan
e-type_gan_yeo_1000.csv	logistic_regression_3	0.5478494623655914	0.007928968389114308	0.5380043477739325	0.5576945769572503	0.605057309188432	0.009192506262122016	0.5936433051094925	0.6164713132673716	nan
e-type_gan_yeo_1000.csv	logistic_regression_1	0.5478494623655914	0.0079289683891143	0.5380043477739325	0.5576945769572503	0.6046826271442651	0.0093605613276254	0.5930599551407741	0.6163052991477561
e-type_gan_yeo_1000.csv	logistic_regression_3	0.5478494623655914	0.0079289683891143	0.5380043477739325	0.5576945769572503	0.605057309188432	0.009192506262122	0.5936433051094925	0.6164713132673716
e-type_gan_yeo_1000.csv	logistic_l2_1	0.5478494623655914	0.0079289683891143	0.5380043477739325	0.5576945769572503	0.604401910742702	0.0089434320580002	0.5932971731359017	0.6155066483495023	0.039735024041155
e-type_gan_yeo_1000.csv	logistic_l2_3	0.5478494623655914	0.0079289683891143	0.5380043477739325	0.5576945769572503	0.604401910742702	0.0089434320580002	0.5932971731359017	0.6155066483495023	0.0397209206190852
e-type_gan_yeo_1000.csv	logistic_l1_3	0.5478494623655914	0.0079289683891143	0.5380043477739325	0.5576945769572503	0.6046759840650323	0.0088376133302076	0.5937026377628677	0.6156493303671969	0.0397270506241863
e-type_gan_yeo_1000.csv	logistic_l2_balanced_1	0.5478494623655914	0.0079289683891143	0.5380043477739325	0.5576945769572503	0.604401910742702	0.0089434320580002	0.5932971731359017	0.6155066483495023	0.0397350550326978
e-type_gan_yeo_100.csv	svm_poly_4	0.5473118279569892	0.0539847595216294	0.4802808956072938	0.6143427603066844	0.6857716632872787	0.0414585112248009	0.6342941224803166	0.7372492040942408	0.0393032017161898
e-type_gan_yeo_1000.csv	decision_tree	0.5467741935483872	0.0430359469221132	0.493338007626591	0.6002103794701834	0.6012145561894462	0.0240589481738065	0.5713414264073804	0.631087685971512	0.0533206831119544
e-type_gan_yeo_1000.csv	logistic_l2_2	0.546774193548387	0.0070098950593576	0.538070259221996	0.5554781278747779	0.6039737372774195	0.008041756726621	0.5939885774676612	0.6139588970871779	0.0398748338557554
e-type_flow_yeo_1000.csv	mlp_7	0.5456989247311828	0.034425399125983074	0.5029541460126542	0.5884437034497113	0.403231988149367	0.004191510584600275	0.39802754035837884	0.40843643594035517	nan
e-type_flow_yeo_1000.csv	mlp_7	0.5456989247311828	0.034425399125983	0.5029541460126542	0.5884437034497113	0.403231988149367	0.0041915105846002	0.3980275403583788	0.4084364359403551
e-type_flow_yeo_100.csv	decision_tree	0.5456989247311828	0.0188172043010752	0.5223342796036925	0.569063569858673	0.6490667188844523	0.0219771537590962	0.621778478278794	0.6763549594901107	0.0534471853257432
e-type_gan_yeo_1000.csv	decision_tree_bal	0.5435483870967742	0.0479143573468159	0.4840548545821627	0.6030419196113858	0.5950279207628626	0.0214913697370644	0.5683428606882637	0.6217129808374615	0.0537001897533206
e-type_gan_yeo_10000.csv	svm_rbf_3	0.5424731182795698	0.0083722642486007	0.5320775791786337	0.5528686573805058	0.5090850314766315	0.0101786796896721	0.4964465313567177	0.5217235315965454	0.0342619028191634
e-type_flow_yeo_10000.csv	mlp_7	0.5403225806451613	0.05855650782470958	0.4676150730186822	0.6130300882716403	0.4461461562499166	0.037790555483491826	0.39922298403394285	0.49306932846589036	nan
e-type_flow_yeo_10000.csv	mlp_7	0.5403225806451613	0.0585565078247095	0.4676150730186822	0.6130300882716403	0.4461461562499166	0.0377905554834918	0.3992229840339428	0.4930693284658903
e-type_gan_yeo_10000.csv	mlp_50_lr0.001	0.5397849462365591	0.0262974131212808	0.5071323951179734	0.5724374973551449	0.5935236834133977	0.0245471848353807	0.563044327746052	0.6240030390807434	0.0441526672158185
e-type_gan_yeo_1000.csv	lda	0.539247311827957	0.0055743121917547	0.5323258890647068	0.5461687345912073	0.60447581644496	0.001024319668237	0.6032039555902581	0.6057476772996618	0.0400585478730552
e-type_flow_yeo_100.csv	decision_tree	0.5376344086021505	0.0202060435193184	0.5125452918180743	0.5627235253862267	0.632694028296005	0.0149356187701619	0.6141490081781984	0.6512390484138115	0.0543959519291587
e-type_ddpm_yeo_35.csv	decision_tree	0.5362573099415204	0.0292835928855071	0.4998969269175303	0.5726176929655106	0.6708432956053121	0.0309575026328827	0.6324044791117633	0.7092821120988608	0.0662489557226399
e-type_gan_yeo_10000.csv	random_forest_4	0.5349462365591398	0.009504123403044984	0.5231453086950929	0.5467471644231866	0.5774892925990368	0.016147606164222464	0.5574393913677486	0.597539193830325	nan
e-type_gan_yeo_10000.csv	random_forest_4	0.5349462365591398	0.0095041234030449	0.5231453086950929	0.5467471644231866	0.5774892925990368	0.0161476061642224	0.5574393913677486	0.597539193830325
e-type_flow_yeo_10000.csv	mlp_12	0.5344086021505376	0.054874276890980664	0.46627318810754204	0.6025440161935333	0.5841690039361067	0.04097333428039589	0.5332938898737709	0.6350441179984425	nan
e-type_flow_yeo_10000.csv	mlp_12	0.5344086021505376	0.0548742768909806	0.466273188107542	0.6025440161935333	0.5841690039361067	0.0409733342803958	0.5332938898737709	0.6350441179984425
e-type_flow_yeo_10000.csv	mlp_11	0.5317204301075269	0.06726878626625256	0.4481951999978571	0.6152456602171966	0.5539583882646955	0.05969738651915108	0.4798342926370107	0.6280824838923802	nan
e-type_flow_yeo_10000.csv	mlp_11	0.5317204301075269	0.0672687862662525	0.4481951999978571	0.6152456602171966	0.5539583882646955	0.059697386519151	0.4798342926370107	0.6280824838923802
e-type_flow_yeo_100.csv	gaussian_nb	0.5311827956989247	0.0067472582785006	0.5228049680079282	0.5395606233899212	0.3670864406048912	0.0034831969503286	0.362761480353015	0.3714114008567674	0.0536536314038211
e-type_flow_yeo_100.csv	gaussian_nb	0.5311827956989247	0.0067472582785006	0.5228049680079282	0.5395606233899212	0.3670864406048912	0.0034831969503286	0.362761480353015	0.3714114008567674	0.0536536314038211
e-type_flow_yeo_100.csv	decision_tree_bal	0.5306451612903226	0.027650302947578	0.4963127755808874	0.5649775469997578	0.6395059968916257	0.0301548003441191	0.6020638669313103	0.6769481268519411	0.0552182163187855
e-type_flow_yeo_100.csv	decision_tree_bal	0.5295698924731183	0.0364641396942218	0.48429368298933	0.5748461019569064	0.6390353994793184	0.040293274925077	0.5890046906351237	0.6890661083235131	0.0553447185325743
e-type_ddpm_yeo_35.csv	decision_tree	0.5292397660818715	0.0306669253850921	0.4911617488956014	0.5673177832681416	0.6614235479274614	0.0180019307816814	0.6390711985776913	0.6837758972772314	0.067251461988304
e-type_vae_yeo_35.csv	decision_tree_bal	0.5269005847953216	0.0348063769355625	0.4836827596465237	0.5701184099441197	0.670939392799973	0.0302904406576751	0.6333288431456101	0.7085499424543358	0.0675856307435254
e-type_gan_yeo_100.csv	decision_tree_bal	0.524731182795699	0.0275061876178204	0.4905777399028131	0.5588846256885848	0.6425447762972833	0.0142006135092423	0.624912385750451	0.6601771668441156	0.0559139784946236
e-type_gan_yeo_10000.csv	mlp_1	0.5236559139784946	0.025741966924460433	0.49169304040544	0.5556187875515493	0.5745321478090417	0.02830358684765642	0.5393886030002731	0.6096756926178103	nan
e-type_gan_yeo_10000.csv	mlp_1	0.5236559139784946	0.0257419669244604	0.49169304040544	0.5556187875515493	0.5745321478090417	0.0283035868476564	0.5393886030002731	0.6096756926178103
e-type_gan_yeo_100.csv	decision_tree	0.5182795698924731	0.0248128618477727	0.48747033264369	0.5490888071412563	0.6356665720933392	0.0259079366785287	0.6034976198518672	0.6678355243348112	0.056672991777356
e-type_flow_yeo_10000.csv	mlp_10	0.5172043010752688	0.020700670223847785	0.4915010241196283	0.5429075780309093	0.6005195252360217	0.033552236390196874	0.5588589212510919	0.6421801292209515	nan
e-type_flow_yeo_10000.csv	mlp_10	0.5172043010752688	0.0207006702238477	0.4915010241196283	0.5429075780309093	0.6005195252360217	0.0335522363901968	0.5588589212510919	0.6421801292209515
e-type_ddpm_yeo_35.csv	decision_tree_bal	0.5152046783625732	0.0343115916063297	0.472601210343923	0.5578081463812234	0.6694148171362788	0.0265414587754225	0.6364592433150272	0.7023703909575304	0.0692564745196324
e-type_vae_yeo_35.csv	decision_tree	0.5146198830409356	0.0346586830149991	0.4715854441160548	0.5576543219658164	0.6608957692805736	0.0227212608625519	0.6326835976737465	0.6891079408874007	0.0693400167084377
e-type_ddpm_yeo_35.csv	decision_tree_bal	0.5128654970760234	0.0306390336781982	0.4748221120180518	0.5509088821339948	0.6572626494458818	0.0270336928655775	0.6236958862761961	0.6908294126155674	0.0695906432748537
e-type_flow_yeo_10000.csv	mlp_9	0.5112903225806452	0.023155758567051623	0.4825386508168388	0.5400419943444517	0.5903440036175478	0.02565635661819953	0.5584874292796524	0.6222005779554431	nan
e-type_flow_yeo_10000.csv	mlp_9	0.5112903225806452	0.0231557585670516	0.4825386508168388	0.5400419943444517	0.5903440036175478	0.0256563566181995	0.5584874292796524	0.6222005779554431
e-type_gan_yeo_10000.csv	mlp_7	0.5075268817204301	0.021954319343113333	0.48026699378701776	0.5347867696538425	0.5633944059099736	0.024046575045546255	0.5335366393958137	0.5932521724241334	nan
e-type_gan_yeo_10000.csv	mlp_7	0.5075268817204301	0.0219543193431133	0.4802669937870177	0.5347867696538425	0.5633944059099736	0.0240465750455462	0.5335366393958137	0.5932521724241334
e-type_gan_yeo_1000.csv	gaussian_nb	0.5021505376344086	0.0134945165570012	0.4853948822524156	0.5189061930164017	0.5736409699395314	0.0158398490355231	0.5539731996551397	0.5933087402239231	0.0394893568001827
e-type_flow_yeo_100.csv	svm_poly_3	0.5005376344086021	0.0061299754037588	0.4929262646398802	0.508149004177324	0.3914451478465484	0.0039922579706505	0.3864881048528496	0.3964021908402472	0.0539339814537955
e-type_flow_yeo_100.csv	logistic_regression_6	0.4946236559139785	0.2525093739423903	0.1810918570807402	0.8081554547472167	0.6588848517516928	0.1239145658123155	0.5050245965294893	0.8127451069738962
e-type_gan_yeo_10000.csv	mlp_9	0.493010752688172	0.03403484846347614	0.45075090666675294	0.5352705987095911	0.5357279164442976	0.014736134647860687	0.5174305885793659	0.5540252443092294	nan
e-type_gan_yeo_10000.csv	mlp_9	0.493010752688172	0.0340348484634761	0.4507509066667529	0.5352705987095911	0.5357279164442976	0.0147361346478606	0.5174305885793659	0.5540252443092294
e-type_ddpm_yeo_35.csv	svm_poly_4	0.4748538011695906	0.1132564510286274	0.334227343363016	0.6154802589761652	0.668672294383476	0.0395471765277047	0.619567989058416	0.7177765997085359	0.0519281093462937
e-type_ddpm_yeo_35.csv	svm_poly_4	0.4748538011695906	0.1132564510286274	0.334227343363016	0.6154802589761652	0.668672294383476	0.0395471765277047	0.619567989058416	0.7177765997085359	0.0502356461013835
e-type_vae_yeo_35.csv	svm_poly_4	0.4748538011695906	0.1132564510286274	0.334227343363016	0.6154802589761652	0.668672294383476	0.0395471765277047	0.619567989058416	0.7177765997085359	0.0509859929669144
e-type_ddpm_yeo_35.csv	mlp_7	0.4730994152046783	0.022592331897171764	0.44504733005248953	0.5011515003568671	0.7170812476541252	0.0215039238003399	0.690380599651126	0.7437818956571244	nan
e-type_flow_yeo_100.csv	svm_sigmoid	0.4596774193548387	0.0102362541745482	0.4469674310698391	0.4723874076398383	0.3866767355103802	0.0087094225164832	0.3758625591265176	0.3974909118942427	0.0539106658725446
e-type_gan_yeo_10000.csv	mlp_5	0.4526881720430108	0.021302809415224687	0.4262372405315301	0.4791391035544915	0.5238254235184014	0.025337333111028704	0.49236496918394085	0.555285877852862	nan
e-type_gan_yeo_10000.csv	mlp_5	0.4526881720430108	0.0213028094152246	0.4262372405315301	0.4791391035544915	0.5238254235184014	0.0253373331110287	0.4923649691839408	0.555285877852862
e-type_ddpm_yeo_35.csv	mlp_5	0.4526315789473684	0.09194035176246877	0.33847255418172073	0.566790603713016	0.7069723029231509	0.027048388347657316	0.6733872929024306	0.7405573129438713	nan
e-type_flow_yeo_100.csv	svm_poly_4	0.4360215053763441	0.0129479511599917	0.4199445005704817	0.4520985101822065	0.3055940930747775	0.0140455951499002	0.2881541832438009	0.323034002905754	0.0539476825633735
e-type_gan_yeo_1000.csv	svm_sigmoid	0.4069892473118279	0.0058894898656469	0.3996764797778681	0.4143020148457876	0.5530486894977639	0.0071820277033583	0.5441310242644017	0.561966354731126	0.0520942285799617
e-type_gan_yeo_1000.csv	svm_sigmoid_bal	0.4069892473118279	0.0058894898656469	0.3996764797778681	0.4143020148457876	0.5530486894977639	0.0071820277033583	0.5441310242644017	0.561966354731126	0.0520911171457786
e-type_gan_yeo_10000.csv	mlp_12	0.4	0.04950909433643587	0.3385263399787736	0.4614736600212264	0.3240654489115623	0.12923219960304333	0.1636024792557803	0.4845284185673443	nan
e-type_gan_yeo_10000.csv	mlp_12	0.4	0.0495090943364358	0.3385263399787736	0.4614736600212264	0.3240654489115623	0.1292321996030433	0.1636024792557803	0.4845284185673443
e-type_flow_yeo_1000.csv	SVM_rbf_1	0.3844086021505376	0.0	0.3844086021505376	0.3844086021505376	0.14776997340733034	0.0	0.14776997340733034	0.14776997340733034	nan
e-type_flow_yeo_1000.csv	SVM_rbf_2	0.3844086021505376	0.0	0.3844086021505376	0.3844086021505376	0.14776997340733034	0.0	0.14776997340733034	0.14776997340733034	nan
e-type_flow_yeo_1000.csv	SVM_rbf_3	0.3844086021505376	0.0	0.3844086021505376	0.3844086021505376	0.14776997340733034	0.0	0.14776997340733034	0.14776997340733034	nan
e-type_flow_yeo_10000.csv	SVM_rbf_1	0.3844086021505376	0.0	0.3844086021505376	0.3844086021505376	0.14776997340733034	0.0	0.14776997340733034	0.14776997340733034	nan
e-type_flow_yeo_10000.csv	SVM_rbf_2	0.3844086021505376	0.0	0.3844086021505376	0.3844086021505376	0.14776997340733034	0.0	0.14776997340733034	0.14776997340733034	nan
e-type_flow_yeo_10000.csv	SVM_rbf_3	0.3844086021505376	0.0	0.3844086021505376	0.3844086021505376	0.14776997340733034	0.0	0.14776997340733034	0.14776997340733034	nan
e-type_flow_yeo_1000.csv	SVM_rbf_1	0.3844086021505376	0.0	0.3844086021505376	0.3844086021505376	0.1477699734073303	0.0	0.1477699734073303	0.1477699734073303
e-type_flow_yeo_1000.csv	SVM_rbf_2	0.3844086021505376	0.0	0.3844086021505376	0.3844086021505376	0.1477699734073303	0.0	0.1477699734073303	0.1477699734073303
e-type_flow_yeo_1000.csv	SVM_rbf_3	0.3844086021505376	0.0	0.3844086021505376	0.3844086021505376	0.1477699734073303	0.0	0.1477699734073303	0.1477699734073303
e-type_flow_yeo_10000.csv	SVM_rbf_1	0.3844086021505376	0.0	0.3844086021505376	0.3844086021505376	0.1477699734073303	0.0	0.1477699734073303	0.1477699734073303
e-type_flow_yeo_10000.csv	SVM_rbf_2	0.3844086021505376	0.0	0.3844086021505376	0.3844086021505376	0.1477699734073303	0.0	0.1477699734073303	0.1477699734073303
e-type_flow_yeo_10000.csv	SVM_rbf_3	0.3844086021505376	0.0	0.3844086021505376	0.3844086021505376	0.1477699734073303	0.0	0.1477699734073303	0.1477699734073303
e-type_flow_yeo_1000.csv	gaussian_nb	0.3844086021505376	0.0	0.3844086021505376	0.3844086021505376	0.1477699734073303	0.0	0.1477699734073303	0.1477699734073303	0.0482966806967667
e-type_flow_yeo_1000.csv	svm_rbf_1	0.3844086021505376	0.0	0.3844086021505376	0.3844086021505376	0.1477699734073303	0.0	0.1477699734073303	0.1477699734073303	0.0483490230189369
e-type_flow_yeo_1000.csv	svm_rbf_2	0.3844086021505376	0.0	0.3844086021505376	0.3844086021505376	0.1477699734073303	0.0	0.1477699734073303	0.1477699734073303	0.0483446045016659
e-type_flow_yeo_1000.csv	svm_rbf_3	0.3844086021505376	0.0	0.3844086021505376	0.3844086021505376	0.1477699734073303	0.0	0.1477699734073303	0.1477699734073303	0.0483452339537236
e-type_flow_yeo_1000.csv	svm_sigmoid	0.3844086021505376	0.0	0.3844086021505376	0.3844086021505376	0.1477699734073303	0.0	0.1477699734073303	0.1477699734073303	0.0483404992381102
e-type_flow_yeo_1000.csv	svm_poly_3	0.3844086021505376	0.0	0.3844086021505376	0.3844086021505376	0.1477699734073303	0.0	0.1477699734073303	0.1477699734073303	0.0483477945074305
e-type_flow_yeo_1000.csv	svm_poly_4	0.3844086021505376	0.0	0.3844086021505376	0.3844086021505376	0.1477699734073303	0.0	0.1477699734073303	0.1477699734073303	0.0483471769699956
e-type_flow_yeo_10000.csv	svm_rbf_1	0.3844086021505376	0.0	0.3844086021505376	0.3844086021505376	0.1477699734073303	0.0	0.1477699734073303	0.1477699734073303	0.0511515235237364
e-type_flow_yeo_10000.csv	svm_rbf_2	0.3844086021505376	0.0	0.3844086021505376	0.3844086021505376	0.1477699734073303	0.0	0.1477699734073303	0.1477699734073303	0.0510676036385413
e-type_flow_yeo_10000.csv	svm_rbf_3	0.3844086021505376	0.0	0.3844086021505376	0.3844086021505376	0.1477699734073303	0.0	0.1477699734073303	0.1477699734073303	0.0511639278477321
e-type_flow_yeo_10000.csv	svm_sigmoid	0.3844086021505376	0.0	0.3844086021505376	0.3844086021505376	0.1477699734073303	0.0	0.1477699734073303	0.1477699734073303	0.0511103111365224
e-type_flow_yeo_10000.csv	svm_poly_3	0.3844086021505376	0.0	0.3844086021505376	0.3844086021505376	0.1477699734073303	0.0	0.1477699734073303	0.1477699734073303	0.0511649991519424
e-type_flow_yeo_10000.csv	svm_poly_4	0.3844086021505376	0.0	0.3844086021505376	0.3844086021505376	0.1477699734073303	0.0	0.1477699734073303	0.1477699734073303	0.0516254799894672
e-type_flow_yeo_100.csv	logistic_regression_5	0.3698924731182796	0.2588306280609587	0.0485118006225176	0.6912731456140415	0.5941062887248789	0.0883870047308774	0.4843593270414824	0.7038532504082754
e-type_gan_yeo_10000.csv	mlp_11	0.3602150537634409	0.03862932221290298	0.3122504150966662	0.40817969243021557	0.29509551620134544	0.09841991143938845	0.17289105546065375	0.41729997694203713	nan
e-type_gan_yeo_10000.csv	mlp_11	0.3602150537634409	0.0386293222129029	0.3122504150966662	0.4081796924302155	0.2950955162013454	0.0984199114393884	0.1728910554606537	0.4172999769420371
e-type_gan_yeo_10000.csv	random_forest_5	0.3344086021505376	0.009617496677418456	0.3224669027733427	0.34635030152773244	0.3642088961367409	0.017508753091780273	0.34246890776923844	0.38594888450424336	nan
e-type_gan_yeo_10000.csv	random_forest_5	0.3344086021505376	0.0096174966774184	0.3224669027733427	0.3463503015277324	0.3642088961367409	0.0175087530917802	0.3424689077692384	0.3859488845042433
e-type_gan_yeo_10000.csv	random_forest_1	0.31451612903225806	0.003801649361217994	0.3097957578866393	0.3192365001778768	0.3660521120301385	0.03900212366599599	0.3176245792205802	0.4144796448396968	nan
e-type_gan_yeo_10000.csv	random_forest_1	0.314516129032258	0.0038016493612179	0.3097957578866393	0.3192365001778768	0.3660521120301385	0.0390021236659959	0.3176245792205802	0.4144796448396968
e-type_gan_yeo_10000.csv	rf_bal_100_10	0.3123655913978495	0.0269756423748432	0.2788709074325867	0.3458602753631122	0.3722210928845617	0.0172038085676542	0.3508597431541159	0.3935824426150074	0.0540287868074439
e-type_gan_yeo_10000.csv	rf_100_10	0.3064516129032258	0.0195701878744099	0.282152015181487	0.3307512106249646	0.3731776651490206	0.0383473676838789	0.3255631192700655	0.4207922110279757	0.0539975051915743
e-type_gan_yeo_10000.csv	rf_200_10	0.3	0.0118096143206928	0.2853364270653239	0.314663572934676	0.3709461827501931	0.023704616545705	0.3415130137941659	0.4003793517062204	0.0540579297731176
e-type_flow_yeo_100.csv	logistic_regression_4	0.2897849462365592	0.2352219661042696	-0.002281700661819	0.5818515931349375	0.5863160985016427	0.0927367325510637	0.4711682363819355	0.7014639606213499
e-type_gan_yeo_10000.csv	random_forest_3	0.28817204301075267	0.02292050940569055	0.2597124716612159	0.3166316143602894	0.35809944040646935	0.0348184254577998	0.31486665504137784	0.40133222577156086	nan
e-type_gan_yeo_10000.csv	random_forest_3	0.2881720430107526	0.0229205094056905	0.2597124716612159	0.3166316143602894	0.3580994404064693	0.0348184254577998	0.3148666550413778	0.4013322257715608
e-type_gan_yeo_10000.csv	decision_tree	0.2811827956989247	0.0101654141941876	0.2685607668671723	0.2938048245306771	0.4180408160401512	0.0080894707759606	0.4079964114131194	0.4280852206671831	0.0845667299177735
e-type_gan_yeo_10000.csv	decision_tree_bal	0.2801075268817204	0.0145260818130175	0.2620710140595341	0.2981440397039068	0.4163421998968496	0.0196322949910254	0.3919654860043771	0.4407189137893221	0.0846932321315623
e-type_flow_yeo_100.csv	svm_rbf_1	0.2451612903225806	0.0153720198446191	0.2260744067018432	0.2642481739433181	0.4641936330576199	0.0116799579860929	0.4496910497257557	0.4786962163894842	0.0539647157078352
e-type_flow_yeo_100.csv	svm_rbf_1	0.2451612903225806	0.0153720198446191	0.2260744067018432	0.2642481739433181	0.4641936330576199	0.0116799579860929	0.4496910497257557	0.4786962163894842	0.0539174589751361
e-type_flow_yeo_100.csv	svm_rbf_2	0.232258064516129	0.0169589358017069	0.2112007644833005	0.2533153645489575	0.4667446249746153	0.0156211805607597	0.4473483674628793	0.4861408824863512	0.0539399210084657
e-type_flow_yeo_100.csv	svm_rbf_2	0.232258064516129	0.0169589358017069	0.2112007644833005	0.2533153645489575	0.4667446249746153	0.0156211805607597	0.4473483674628793	0.4861408824863512	0.0539381806719945
e-type_flow_yeo_100.csv	svm_rbf_3	0.2263440860215054	0.0109853853450013	0.2127039285322219	0.2399842435107888	0.2288695504400875	0.0237727334154914	0.1993518032191761	0.258387297660999	0.0539195480008041
e-type_flow_yeo_100.csv	svm_rbf_3	0.2263440860215054	0.0109853853450013	0.2127039285322219	0.2399842435107888	0.2288695504400875	0.0237727334154914	0.1993518032191761	0.258387297660999	0.053940812772858
e-type_gan_yeo_10000.csv	gaussian_nb	0.203763440860215	0.0048087483387092	0.1977925911716176	0.2097342905488124	0.3051727786059786	0.0037423655038443	0.3005260180917354	0.3098195391202218	0.057294290335996
e-type_flow_yeo_100.csv	logistic_regression_1	0.1698924731182795	0.0623922356877249	0.0924222802973873	0.2473626659391717	0.5499590662611136	0.0802290959300855	0.45034148623629	0.6495766462859371
e-type_flow_yeo_100.csv	logistic_regression_3	0.1618279569892473	0.0896697799793996	0.0504882194619739	0.2731676945165207	0.5522372659659098	0.0833900220186072	0.4486948778159858	0.6557796541158338
e-type_flow_yeo_100.csv	logistic_regression_2	0.15752688172043	0.0853595159602434	0.051539043848496	0.2635147195923641	0.5307243626966043	0.1098623024489455	0.3943122969859751	0.6671364284072334
e-type_gan_yeo_10000.csv	lda	0.1118279569892473	0.0030649877018794	0.1080222721048863	0.1156336418736082	0.3457130488144327	0.0108476631241069	0.3322438960485865	0.3591822015802789	0.0560540731986663
e-type_gan_yeo_10000.csv	logistic_regression_2	0.10806451612903226	0.0035049475296788403	0.10371254896583681	0.1124164832922277	0.3273913807303993	0.006209641284798358	0.3196810927053054	0.3351016687554932	nan
e-type_gan_yeo_10000.csv	logistic_regression_5	0.10806451612903226	0.003987203487685837	0.10311374910486026	0.11301528315320425	0.32664265330480535	0.009095709346952167	0.3153488384705694	0.3379364681390413	nan
e-type_gan_yeo_10000.csv	logistic_regression_2	0.1080645161290322	0.0035049475296788	0.1037125489658368	0.1124164832922277	0.3273913807303993	0.0062096412847983	0.3196810927053054	0.3351016687554932
e-type_gan_yeo_10000.csv	logistic_regression_5	0.1080645161290322	0.0039872034876858	0.1031137491048602	0.1130152831532042	0.3266426533048053	0.0090957093469521	0.3153488384705694	0.3379364681390413
e-type_gan_yeo_10000.csv	logistic_regression_1	0.1075268817204301	0.003801649361217994	0.10280651057481137	0.11224725286604882	0.3272114581042401	0.0063344789821243065	0.3193461636047579	0.3350767526037223	nan
e-type_gan_yeo_10000.csv	logistic_regression_3	0.1075268817204301	0.003801649361217994	0.10280651057481137	0.11224725286604882	0.3272114581042401	0.0063344789821243065	0.3193461636047579	0.3350767526037223	nan
e-type_gan_yeo_10000.csv	logistic_regression_4	0.1075268817204301	0.004250373199151044	0.10224934634011408	0.11280441710074611	0.3262365552900617	0.008998145377936606	0.3150638821236742	0.33740922845644916	nan
e-type_gan_yeo_10000.csv	logistic_regression_6	0.1075268817204301	0.004250373199151044	0.10224934634011408	0.11280441710074611	0.3261958315158758	0.008739030493705427	0.3153448919726369	0.3370467710591147	nan
e-type_gan_yeo_10000.csv	logistic_regression_1	0.1075268817204301	0.0038016493612179	0.1028065105748113	0.1122472528660488	0.3272114581042401	0.0063344789821243	0.3193461636047579	0.3350767526037223
e-type_gan_yeo_10000.csv	logistic_regression_3	0.1075268817204301	0.0038016493612179	0.1028065105748113	0.1122472528660488	0.3272114581042401	0.0063344789821243	0.3193461636047579	0.3350767526037223
e-type_gan_yeo_10000.csv	logistic_regression_4	0.1075268817204301	0.004250373199151	0.102249346340114	0.1128044171007461	0.3262365552900617	0.0089981453779366	0.3150638821236742	0.3374092284564491
e-type_gan_yeo_10000.csv	logistic_regression_6	0.1075268817204301	0.004250373199151	0.102249346340114	0.1128044171007461	0.3261958315158758	0.0087390304937054	0.3153448919726369	0.3370467710591147
e-type_gan_yeo_10000.csv	logistic_l2_1	0.1075268817204301	0.004250373199151	0.102249346340114	0.1128044171007461	0.3267625032030529	0.0088683592853312	0.3157509807553209	0.3377740256507848	0.0561837027665232
e-type_gan_yeo_10000.csv	logistic_l2_2	0.1075268817204301	0.004250373199151	0.102249346340114	0.1128044171007461	0.3267881048415578	0.0088945785654855	0.3157440268575994	0.3378321828255161	0.0561748301048352
e-type_gan_yeo_10000.csv	logistic_l2_3	0.1075268817204301	0.004250373199151	0.102249346340114	0.1128044171007461	0.3267625032030529	0.0088683592853312	0.3157509807553209	0.3377740256507848	0.0561845978230631
e-type_gan_yeo_10000.csv	logistic_l1_1	0.1075268817204301	0.004250373199151	0.102249346340114	0.1128044171007461	0.3267881048415578	0.0088945785654855	0.3157440268575994	0.3378321828255161	0.0561762087113458
e-type_gan_yeo_10000.csv	logistic_l1_2	0.1075268817204301	0.004250373199151	0.102249346340114	0.1128044171007461	0.3265424631121782	0.0088956609029775	0.3154970412287222	0.3375878849956342	0.0561011592725851
e-type_gan_yeo_10000.csv	logistic_l1_3	0.1075268817204301	0.004250373199151	0.102249346340114	0.1128044171007461	0.3267625032030529	0.0088683592853312	0.3157509807553209	0.3377740256507848	0.0561838374845845
e-type_gan_yeo_10000.csv	logistic_l2_balanced_1	0.1075268817204301	0.004250373199151	0.102249346340114	0.1128044171007461	0.3267625032030529	0.0088683592853312	0.3157509807553209	0.3377740256507848	0.0561837210377987
e-type_gan_yeo_10000.csv	logistic_l1_balanced_1	0.1075268817204301	0.004250373199151	0.102249346340114	0.1128044171007461	0.3267881048415578	0.0088945785654855	0.3157440268575994	0.3378321828255161	0.0561762088369217
e-type_flow_yeo_10000.csv	gaussian_nb	0.0913978494623656	0.0	0.0913978494623656	0.0913978494623656	0.0083535668863452	0.0	0.0083535668863452	0.0083535668863452	0.0585338269900054
e-type_gan_yeo_10000.csv	svm_sigmoid	0.086021505376344	0.0115622651438745	0.0716650570095088	0.1003779537431793	0.2428044508237576	0.0443918286849188	0.1876847153312646	0.2979241863162505	0.0553113183596802
e-type_gan_yeo_10000.csv	svm_sigmoid_bal	0.086021505376344	0.0115622651438745	0.0716650570095088	0.1003779537431793	0.2428044508237576	0.0443918286849188	0.1876847153312646	0.2979241863162505	0.0553134971481694
e-type_flow_yeo_100.csv	logistic_l1_2	0.0677419354838709	0.0335429586178797	0.0260928513748109	0.1093910195929309	0.3798392545877657	0.2210174650877761	0.1054098252140162	0.654268683961515	0.0553633217992249
e-type_flow_yeo_100.csv	svm_rbf_bal	0.0618279569892473	0.0	0.0618279569892473	0.0618279569892473	0.0038226962654642	0.0	0.0038226962654642	0.0038226962654642	0.0532863465641394
e-type_flow_yeo_100.csv	svm_rbf_bal	0.0618279569892473	0.0	0.0618279569892473	0.0618279569892473	0.0038226962654642	0.0	0.0038226962654642	0.0038226962654642	0.0533630906383335
e-type_flow_yeo_100.csv	svm_sigmoid_bal	0.0618279569892473	0.0	0.0618279569892473	0.0618279569892473	0.0038226962654642	0.0	0.0038226962654642	0.0038226962654642	0.0531628159265673
e-type_flow_yeo_100.csv	logistic_l2_2	0.0612903225806451	0.0294106169819523	0.0247722183091946	0.0978084268520957	0.3609450017692904	0.2095124054790929	0.1008009907088312	0.6210890128297497	0.0553633217992262
e-type_flow_yeo_100.csv	logistic_l2_3	0.0612903225806451	0.0294106169819523	0.0247722183091946	0.0978084268520957	0.360921699919166	0.2093729268910689	0.1009508743999765	0.6208925254383556	0.0553633217992262
e-type_flow_yeo_100.csv	logistic_l1_3	0.0612903225806451	0.0294106169819523	0.0247722183091946	0.0978084268520957	0.3610350873804783	0.2095290515850228	0.1008704074495756	0.6211997673113809	0.0553633217992262
e-type_flow_yeo_100.csv	logistic_l1_3	0.0612903225806451	0.0294106169819523	0.0247722183091946	0.0978084268520957	0.3607327165566252	0.2093003397502503	0.1008520198769226	0.6206134132363279	0.0553633217992262
e-type_flow_yeo_100.csv	logistic_l2_1	0.060752688172043	0.0296674831426266	0.0239156424365263	0.0975897339075596	0.3536365938266673	0.2073160415257669	0.0962197288140054	0.6110534588393293	0.0553633217992262
e-type_flow_yeo_100.csv	logistic_l2_2	0.060752688172043	0.029849605682777	0.0236895074351602	0.0978158689089257	0.3556618847557843	0.2076688293332388	0.0978069758235793	0.6135167936879893	0.0553633217992262
e-type_flow_yeo_100.csv	logistic_l2_3	0.060752688172043	0.0296674831426266	0.0239156424365263	0.0975897339075596	0.3540045412158874	0.2074386804992533	0.0964353998050708	0.611573682626704	0.0553633217992262
e-type_flow_yeo_100.csv	logistic_l2_1	0.0602150537634408	0.029789021886441	0.023227097745343	0.0972030097815387	0.3543685315319774	0.2076633952805078	0.0965203698674128	0.612216693196542	0.0553633217992262
e-type_flow_yeo_100.csv	logistic_l1_1	0.0596774193548387	0.0258819460256148	0.0275407387713796	0.0918140999382977	0.3599431243203339	0.2085073250746455	0.101047085413377	0.6188391632272907	0.0553633217992262
e-type_flow_yeo_100.csv	logistic_l1_1	0.0596774193548387	0.0258819460256148	0.0275407387713796	0.0918140999382977	0.3600268055733699	0.2086126347925346	0.1010000073810492	0.6190536037656906	0.0553633217992262
e-type_flow_yeo_1000.csv	logistic_l1_1	0.053763440860215	7.757919228897728e-18	0.053763440860215	0.053763440860215	0.0205238656714291	0.0003968666876425	0.020031090593297	0.0210166407495612	0.0553633217993079
e-type_flow_yeo_100.csv	logistic_l1_2	0.0532258064516129	0.0120818306743248	0.0382242322709098	0.068227380632316	0.3496896718662596	0.1978315251640177	0.1040493893603563	0.595329954372163	0.0553633217992262
e-type_flow_yeo_1000.csv	logistic_l1_3	0.0526881720430107	0.0030649877018794	0.0488824871586498	0.0564938569273717	0.0198056522132696	0.0019672934503116	0.0173629347621156	0.0222483696644236	0.0553633217993079
e-type_flow_yeo_1000.csv	logistic_l1_balanced_1	0.0526881720430107	0.0024043741693546	0.049702747198712	0.0556735968873094	0.0201176549365687	0.0037944595861639	0.0154062110757898	0.0248290987973477	0.0553633217993079
e-type_flow_yeo_1000.csv	logistic_l2_2	0.0521505376344086	0.0014723724664117	0.0503223457509186	0.0539787295178985	0.0190492112935489	0.0014723724664117	0.017221019410059	0.0208774031770389	0.0553633217993079
e-type_flow_yeo_1000.csv	logistic_l1_2	0.0521505376344086	0.0014723724664117	0.0503223457509186	0.0539787295178985	0.0188428465710552	0.0011996699269237	0.0173532596130662	0.0203324335290442	0.0553633217993079
e-type_flow_yeo_1000.csv	logistic_l2_3	0.0516129032258064	0.0012021870846773	0.0501201908036571	0.0531056156479558	0.0184799513314996	0.0011314701973433	0.0170750455224178	0.0198848571405813	0.0553633217993079
e-type_flow_yeo_1000.csv	logistic_l2_balanced_1	0.0516129032258064	0.0066934944075208	0.0433018321978095	0.0599239742538033	0.0203051427343889	0.0039337656958378	0.015420727492498	0.0251895579762798	0.0553633217993079
e-type_flow_yeo_1000.csv	logistic_l2_1	0.0505376344086021	0.0029447449328234	0.0468812506416222	0.054194018175582	0.0181900157751411	0.0012541273640723	0.0166328109780103	0.019747220572272	0.0553633217993079
e-type_flow_yeo_100.csv	logistic_l2_balanced_1	0.0483870967741935	0.0095041234030449	0.0365861689101467	0.0601880246382403	0.1860954657065462	0.2477655872845365	-0.1215461440184756	0.4937370754315681	0.0553633217992275
e-type_flow_yeo_100.csv	logistic_l1_balanced_1	0.0467741935483871	0.0079744069753716	0.036872659500043	0.0566757275967311	0.1077911731086911	0.224865111081283	-0.1714157397730288	0.3869980859904112	0.0553633217992275
e-type_flow_yeo_100.csv	logistic_l2_balanced_1	0.0462365591397849	0.0091949631056382	0.034819504486702	0.0576536137928678	0.1836288733284984	0.2499074490988168	-0.1266722091004427	0.4939299557574395	0.0553633217992288
e-type_flow_yeo_100.csv	logistic_l1_balanced_1	0.0456989247311828	0.0078373009339318	0.0359676303184308	0.0554302191439347	0.1050160844628552	0.2263287482030418	-0.1760081739393873	0.3860403428650978	0.0553633217992293
e-type_flow_yeo_10000.csv	logistic_l2_balanced_1	0.0435483870967742	0.0012021870846773	0.0420556746746248	0.0450410995189235	0.0053552863403976	4.303726042310005e-05	0.0053018485235489	0.0054087241572463	0.0553633217993079
e-type_flow_yeo_10000.csv	logistic_l1_balanced_1	0.043010752688172	0.0019008246806089	0.0406505671153626	0.0453709382609814	0.0052858437369862	0.0001875818763093	0.0050529300744574	0.005518757399515	0.0553633217993079
e-type_flow_yeo_10000.csv	svm_rbf_bal	0.0403225806451612	0.0	0.0403225806451612	0.0403225806451612	0.0016259105098855	2.42434975903054e-19	0.0016259105098855	0.0016259105098855	0.0512705184467345
e-type_flow_yeo_10000.csv	svm_sigmoid_bal	0.0403225806451612	0.0	0.0403225806451612	0.0403225806451612	0.0016259105098855	2.42434975903054e-19	0.0016259105098855	0.0016259105098855	0.0513083378186966
e-type_flow_yeo_10000.csv	logistic_l2_1	0.0284946236559139	0.0014723724664117	0.026666431772424	0.0303228155394039	0.0037630441904813	9.326193295308088e-05	0.0036472442059305	0.003878844175032	0.0553633217993079
e-type_flow_yeo_10000.csv	logistic_l2_2	0.0284946236559139	0.0014723724664117	0.026666431772424	0.0303228155394039	0.0037661585645908	0.000100571557872	0.0036412824819378	0.0038910346472437	0.0553633217993079
e-type_flow_yeo_10000.csv	logistic_l2_3	0.0284946236559139	0.0014723724664117	0.026666431772424	0.0303228155394039	0.0037630441904813	9.326193295308088e-05	0.0036472442059305	0.003878844175032	0.0553633217993079
e-type_flow_yeo_10000.csv	logistic_l1_1	0.0284946236559139	0.0014723724664117	0.026666431772424	0.0303228155394039	0.0037619324567993	9.456048334735304e-05	0.0036445201089741	0.0038793448046244	0.0553633217993079
e-type_flow_yeo_10000.csv	logistic_l1_2	0.0284946236559139	0.0014723724664117	0.026666431772424	0.0303228155394039	0.0037703846723822	9.772896933926974e-05	0.0036490381295721	0.0038917312151924	0.0553633217993079
e-type_flow_yeo_10000.csv	logistic_l1_3	0.0284946236559139	0.0014723724664117	0.026666431772424	0.0303228155394039	0.0037630441904813	9.326193295308088e-05	0.0036472442059305	0.003878844175032	0.0553633217993079
e-type_flow_yeo_1000.csv	svm_rbf_bal	0.0268817204301075	3.878959614448864e-18	0.0268817204301075	0.0268817204301075	0.0007226268932824	0.0	0.0007226268932824	0.0007226268932824	0.0483730618187486
e-type_flow_yeo_1000.csv	svm_sigmoid_bal	0.0268817204301075	3.878959614448864e-18	0.0268817204301075	0.0268817204301075	0.0007226268932824	0.0	0.0007226268932824	0.0007226268932824	0.048362331711111
e-type_flow_yeo_1000.csv	logistic_regression_1	0.013440860215053762	1.939479807224432e-18	0.01344086021505376	0.013440860215053764	0.0001806567233206151	0.0	0.0001806567233206151	0.0001806567233206151	nan
e-type_flow_yeo_1000.csv	logistic_regression_2	0.013440860215053762	1.939479807224432e-18	0.01344086021505376	0.013440860215053764	0.0001806567233206151	0.0	0.0001806567233206151	0.0001806567233206151	nan
e-type_flow_yeo_1000.csv	logistic_regression_3	0.013440860215053762	1.939479807224432e-18	0.01344086021505376	0.013440860215053764	0.0001806567233206151	0.0	0.0001806567233206151	0.0001806567233206151	nan
e-type_flow_yeo_1000.csv	logistic_regression_4	0.013440860215053762	1.939479807224432e-18	0.01344086021505376	0.013440860215053764	0.0001806567233206151	0.0	0.0001806567233206151	0.0001806567233206151	nan
e-type_flow_yeo_1000.csv	logistic_regression_5	0.013440860215053762	1.939479807224432e-18	0.01344086021505376	0.013440860215053764	0.0001806567233206151	0.0	0.0001806567233206151	0.0001806567233206151	nan
e-type_flow_yeo_1000.csv	logistic_regression_6	0.013440860215053762	1.939479807224432e-18	0.01344086021505376	0.013440860215053764	0.0001806567233206151	0.0	0.0001806567233206151	0.0001806567233206151	nan
e-type_flow_yeo_10000.csv	logistic_regression_1	0.013440860215053762	1.939479807224432e-18	0.01344086021505376	0.013440860215053764	0.0001806567233206151	0.0	0.0001806567233206151	0.0001806567233206151	nan
e-type_flow_yeo_10000.csv	logistic_regression_2	0.013440860215053762	1.939479807224432e-18	0.01344086021505376	0.013440860215053764	0.0001806567233206151	0.0	0.0001806567233206151	0.0001806567233206151	nan
e-type_flow_yeo_10000.csv	logistic_regression_3	0.013440860215053762	1.939479807224432e-18	0.01344086021505376	0.013440860215053764	0.0001806567233206151	0.0	0.0001806567233206151	0.0001806567233206151	nan
e-type_flow_yeo_10000.csv	logistic_regression_4	0.013440860215053762	1.939479807224432e-18	0.01344086021505376	0.013440860215053764	0.0001806567233206151	0.0	0.0001806567233206151	0.0001806567233206151	nan
e-type_flow_yeo_10000.csv	logistic_regression_5	0.013440860215053762	1.939479807224432e-18	0.01344086021505376	0.013440860215053764	0.0001806567233206151	0.0	0.0001806567233206151	0.0001806567233206151	nan
e-type_flow_yeo_10000.csv	logistic_regression_6	0.013440860215053762	1.939479807224432e-18	0.01344086021505376	0.013440860215053764	0.0001806567233206151	0.0	0.0001806567233206151	0.0001806567233206151	nan
e-type_flow_yeo_1000.csv	logistic_regression_1	0.0134408602150537	1.939479807224432e-18	0.0134408602150537	0.0134408602150537	0.0001806567233206	0.0	0.0001806567233206	0.0001806567233206
e-type_flow_yeo_1000.csv	logistic_regression_2	0.0134408602150537	1.939479807224432e-18	0.0134408602150537	0.0134408602150537	0.0001806567233206	0.0	0.0001806567233206	0.0001806567233206
e-type_flow_yeo_1000.csv	logistic_regression_3	0.0134408602150537	1.939479807224432e-18	0.0134408602150537	0.0134408602150537	0.0001806567233206	0.0	0.0001806567233206	0.0001806567233206
e-type_flow_yeo_1000.csv	logistic_regression_4	0.0134408602150537	1.939479807224432e-18	0.0134408602150537	0.0134408602150537	0.0001806567233206	0.0	0.0001806567233206	0.0001806567233206
e-type_flow_yeo_1000.csv	logistic_regression_5	0.0134408602150537	1.939479807224432e-18	0.0134408602150537	0.0134408602150537	0.0001806567233206	0.0	0.0001806567233206	0.0001806567233206
e-type_flow_yeo_1000.csv	logistic_regression_6	0.0134408602150537	1.939479807224432e-18	0.0134408602150537	0.0134408602150537	0.0001806567233206	0.0	0.0001806567233206	0.0001806567233206
e-type_flow_yeo_10000.csv	logistic_regression_1	0.0134408602150537	1.939479807224432e-18	0.0134408602150537	0.0134408602150537	0.0001806567233206	0.0	0.0001806567233206	0.0001806567233206
e-type_flow_yeo_10000.csv	logistic_regression_2	0.0134408602150537	1.939479807224432e-18	0.0134408602150537	0.0134408602150537	0.0001806567233206	0.0	0.0001806567233206	0.0001806567233206
e-type_flow_yeo_10000.csv	logistic_regression_3	0.0134408602150537	1.939479807224432e-18	0.0134408602150537	0.0134408602150537	0.0001806567233206	0.0	0.0001806567233206	0.0001806567233206
e-type_flow_yeo_10000.csv	logistic_regression_4	0.0134408602150537	1.939479807224432e-18	0.0134408602150537	0.0134408602150537	0.0001806567233206	0.0	0.0001806567233206	0.0001806567233206
e-type_flow_yeo_10000.csv	logistic_regression_5	0.0134408602150537	1.939479807224432e-18	0.0134408602150537	0.0134408602150537	0.0001806567233206	0.0	0.0001806567233206	0.0001806567233206
e-type_flow_yeo_10000.csv	logistic_regression_6	0.0134408602150537	1.939479807224432e-18	0.0134408602150537	0.0134408602150537	0.0001806567233206	0.0	0.0001806567233206	0.0001806567233206
